# Supplementary material for: Resolving Recalcitrant Clades in the Pantropical Ochnaceae: Insights From Comparative Phylogenomics of Plastome and Nuclear Genomic Data Derived From Targeted Sequencing
Source: Front Plant Sci. 2021 Feb 4;12:638650. doi: 10.3389/fpls.2021.638650 (PMC7890083; doi:10.3389/fpls.2021.638650)
Supplement: Supplementary Data 1 — Annotated de novo reference contig (Ouratea bahiensis) before and after removal of the inverted repeat (in different file formats). [file Data_Sheet_1.ZIP]

Archive with 9 entries (9 files):
- GeSeqJob-20200503-172332_scaffold1_size138408_GBSON.json
- GeSeqJob-20200503-172332_scaffold1_size138408_GenBank.gb
- size138408_GeSeqEdit100891.gb
- size138408_GeSeqEdit100891.geneious
- size138408_GeSeqEdit100891.fasta
- GeSeqJob-20200503-172332_scaffold1_size138408_GFF3.gff3
- GeSeqJob-20200503-172332_scaffold1_size138408_GFF3 + FASTA.gff3
- size138408_GeSeqEdit100891.gff
- GeSeqJob-20200503-172332_scaffold1_size138408_OGDRAW.jpg
