# Supplementary material for: Resolving Recalcitrant Clades in the Pantropical Ochnaceae: Insights From Comparative Phylogenomics of Plastome and Nuclear Genomic Data Derived From Targeted Sequencing
Source: Front Plant Sci. 2021 Feb 4;12:638650. doi: 10.3389/fpls.2021.638650 (PMC7890083; doi:10.3389/fpls.2021.638650)
Supplement: Supplementary Data 1 — Annotated de novo reference contig (Ouratea bahiensis) before and after removal of the inverted repeat (in different file formats). [file Data_Sheet_1.ZIP › GeSeqJob-20200503-172332_scaffold1_size138408_GFF3.gff3]

##gff-version 3
##source-version GeSeq 1.82
##sequence-region	scaffold1|size138408	1	138408
scaffold1|size138408	GeSeq	source	1	138408	.	+	1	ID=source-null;gbkey=source
scaffold1|size138408	blatN	gene	113290	113363	100.0	+	1	ID=gene-blatn_trnI-CAU_1;gbkey=gene;gene=trnI-CAU;gene_biotype=tRNA;Note=blatN_hit_trnI-CAU_NC_036341.1%2C_position_1_-_74%2C_psl_score_100.0%2C_coverage_100.00%25%2C_match_100.00%25
scaffold1|size138408	blatN	tRNA	113290	113363	.	+	1	ID=trna-blatn_trnI-CAU_1;gbkey=tRNA;gene=trnI-CAU
scaffold1|size138408	blatN	gene	105349	105429	100.0	+	1	ID=gene-blatn_trnL-CAA_1;gbkey=gene;gene=trnL-CAA;gene_biotype=tRNA;Note=blatN_hit_trnL-CAA_NC_036341.1%2C_position_1_-_81%2C_psl_score_100.0%2C_coverage_100.00%25%2C_match_100.00%25
scaffold1|size138408	blatN	tRNA	105349	105429	.	+	1	ID=trna-blatn_trnL-CAA_1;gbkey=tRNA;gene=trnL-CAA
scaffold1|size138408	blatN	gene	98967	99038	100.0	-	1	ID=gene-blatn_trnV-GAC_1;gbkey=gene;gene=trnV-GAC;gene_biotype=tRNA;Note=blatN_hit_trnV-GAC_NC_036341.1%2C_position_1_-_72%2C_psl_score_100.0%2C_coverage_100.00%25%2C_match_100.00%25
scaffold1|size138408	blatN	tRNA	98967	99038	.	-	1	ID=trna-blatn_trnV-GAC_1;gbkey=tRNA;gene=trnV-GAC
scaffold1|size138408	blatN	gene	91175	91248	100.0	-	1	ID=gene-blatn_trnR-ACG_1;gbkey=gene;gene=trnR-ACG;gene_biotype=tRNA;Note=blatN_hit_trnR-ACG_NC_036341.1%2C_position_1_-_74%2C_psl_score_100.0%2C_coverage_100.00%25%2C_match_100.00%25
scaffold1|size138408	blatN	tRNA	91175	91248	.	-	1	ID=trna-blatn_trnR-ACG_1;gbkey=tRNA;gene=trnR-ACG
scaffold1|size138408	blatN	gene	86115	86194	100.0	-	1	ID=gene-blatn_trnL-UAG_1;gbkey=gene;gene=trnL-UAG;gene_biotype=tRNA;Note=blatN_hit_trnL-UAG_NC_036341.1%2C_position_1_-_80%2C_psl_score_100.0%2C_coverage_100.00%25%2C_match_100.00%25
scaffold1|size138408	blatN	tRNA	86115	86194	.	-	1	ID=trna-blatn_trnL-UAG_1;gbkey=tRNA;gene=trnL-UAG
scaffold1|size138408	blatN	gene	69631	69704	100.0	+	1	ID=gene-blatn_trnR-ACG_2;gbkey=gene;gene=trnR-ACG;gene_biotype=tRNA;Note=blatN_hit_trnR-ACG_NC_036341.1%2C_position_1_-_74%2C_psl_score_100.0%2C_coverage_100.00%25%2C_match_100.00%25
scaffold1|size138408	blatN	tRNA	69631	69704	.	+	1	ID=trna-blatn_trnR-ACG_2;gbkey=tRNA;gene=trnR-ACG
scaffold1|size138408	blatN	gene	61841	61912	100.0	+	1	ID=gene-blatn_trnV-GAC_2;gbkey=gene;gene=trnV-GAC;gene_biotype=tRNA;Note=blatN_hit_trnV-GAC_NC_036341.1%2C_position_1_-_72%2C_psl_score_100.0%2C_coverage_100.00%25%2C_match_100.00%25
scaffold1|size138408	blatN	tRNA	61841	61912	.	+	1	ID=trna-blatn_trnV-GAC_2;gbkey=tRNA;gene=trnV-GAC
scaffold1|size138408	blatN	gene	55450	55530	100.0	-	1	ID=gene-blatn_trnL-CAA_2;gbkey=gene;gene=trnL-CAA;gene_biotype=tRNA;Note=blatN_hit_trnL-CAA_NC_036341.1%2C_position_1_-_81%2C_psl_score_100.0%2C_coverage_100.00%25%2C_match_100.00%25
scaffold1|size138408	blatN	tRNA	55450	55530	.	-	1	ID=trna-blatn_trnL-CAA_2;gbkey=tRNA;gene=trnL-CAA
scaffold1|size138408	blatN	gene	47516	47589	100.0	-	1	ID=gene-blatn_trnI-CAU_2;gbkey=gene;gene=trnI-CAU;gene_biotype=tRNA;Note=blatN_hit_trnI-CAU_NC_036341.1%2C_position_1_-_74%2C_psl_score_100.0%2C_coverage_100.00%25%2C_match_100.00%25
scaffold1|size138408	blatN	tRNA	47516	47589	.	-	1	ID=trna-blatn_trnI-CAU_2;gbkey=tRNA;gene=trnI-CAU
scaffold1|size138408	blatN	gene	27338	27411	100.0	-	1	ID=gene-blatn_trnP-UGG_1;gbkey=gene;gene=trnP-UGG;gene_biotype=tRNA;Note=blatN_hit_trnP-UGG_NC_036341.1%2C_position_1_-_74%2C_psl_score_100.0%2C_coverage_100.00%25%2C_match_100.00%25
scaffold1|size138408	blatN	tRNA	27338	27411	.	-	1	ID=trna-blatn_trnP-UGG_1;gbkey=tRNA;gene=trnP-UGG
scaffold1|size138408	blatN	gene	5401	5481	100.0	+	1	ID=gene-blatn_trnL-CAA_3;gbkey=gene;gene=trnL-CAA;gene_biotype=tRNA;Note=blatN_hit_trnL-CAA_NC_036341.1%2C_position_1_-_81%2C_psl_score_100.0%2C_coverage_100.00%25%2C_match_100.00%25
scaffold1|size138408	blatN	tRNA	5401	5481	.	+	1	ID=trna-blatn_trnL-CAA_3;gbkey=tRNA;gene=trnL-CAA
scaffold1|size138408	blatN	gene	94999	95870	71.3	-	1	ID=gene-blatn_trnA-UGC_1;gbkey=gene;gene=trnA-UGC;gene_biotype=tRNA;Note=blatN_hit_trnA-UGC_NC_036341.1%2C_position_1_-_73%2C_psl_score_71.3%2C_coverage_100.00%25%2C_match_100.00%25
scaffold1|size138408	blatN	tRNA	94999	95033	.	-	1	ID=trna-blatn_trnA-UGC_1;gbkey=tRNA;gene=trnA-UGC
scaffold1|size138408	blatN	tRNA	95833	95870	.	-	1	ID=trna-blatn_trnA-UGC_1;gbkey=tRNA;gene=trnA-UGC
scaffold1|size138408	blatN	exon	94999	95033	.	-	1	ID=blatn_trnA-UGC_1_exon_2;Parent=gene-blatn_trnA-UGC_1;gbkey=exon;gene=trnA-UGC
scaffold1|size138408	blatN	intron	95034	95832	.	-	1	ID=blatn_trnA-UGC_1_intron_1;Parent=gene-blatn_trnA-UGC_1;gbkey=intron;gene=trnA-UGC
scaffold1|size138408	blatN	exon	95833	95870	.	-	1	ID=blatn_trnA-UGC_1_exon_1;Parent=gene-blatn_trnA-UGC_1;gbkey=exon;gene=trnA-UGC
scaffold1|size138408	blatN	gene	65009	65880	71.3	+	1	ID=gene-blatn_trnA-UGC_2;gbkey=gene;gene=trnA-UGC;gene_biotype=tRNA;Note=blatN_hit_trnA-UGC_NC_036341.1%2C_position_1_-_73%2C_psl_score_71.3%2C_coverage_100.00%25%2C_match_100.00%25
scaffold1|size138408	blatN	tRNA	65009	65046	.	+	1	ID=trna-blatn_trnA-UGC_2;gbkey=tRNA;gene=trnA-UGC
scaffold1|size138408	blatN	tRNA	65846	65880	.	+	1	ID=trna-blatn_trnA-UGC_2;gbkey=tRNA;gene=trnA-UGC
scaffold1|size138408	blatN	exon	65009	65046	.	+	1	ID=blatn_trnA-UGC_2_exon_1;Parent=gene-blatn_trnA-UGC_2;gbkey=exon;gene=trnA-UGC
scaffold1|size138408	blatN	intron	65047	65845	.	+	1	ID=blatn_trnA-UGC_2_intron_1;Parent=gene-blatn_trnA-UGC_2;gbkey=intron;gene=trnA-UGC
scaffold1|size138408	blatN	exon	65846	65880	.	+	1	ID=blatn_trnA-UGC_2_exon_2;Parent=gene-blatn_trnA-UGC_2;gbkey=exon;gene=trnA-UGC
scaffold1|size138408	blatN	gene	95935	96955	69.5	-	1	ID=gene-blatn_trnI-GAU_1;gbkey=gene;gene=trnI-GAU;gene_biotype=tRNA;Note=blatN_hit_trnI-GAU_NC_036341.1%2C_position_1_-_72%2C_psl_score_69.5%2C_coverage_100.00%25%2C_match_100.00%25
scaffold1|size138408	blatN	tRNA	95935	95969	.	-	1	ID=trna-blatn_trnI-GAU_1;gbkey=tRNA;gene=trnI-GAU
scaffold1|size138408	blatN	tRNA	96919	96955	.	-	1	ID=trna-blatn_trnI-GAU_1;gbkey=tRNA;gene=trnI-GAU
scaffold1|size138408	blatN	exon	95935	95969	.	-	1	ID=blatn_trnI-GAU_1_exon_2;Parent=gene-blatn_trnI-GAU_1;gbkey=exon;gene=trnI-GAU
scaffold1|size138408	blatN	intron	95970	96918	.	-	1	ID=blatn_trnI-GAU_1_intron_1;Parent=gene-blatn_trnI-GAU_1;gbkey=intron;gene=trnI-GAU
scaffold1|size138408	blatN	exon	96919	96955	.	-	1	ID=blatn_trnI-GAU_1_exon_1;Parent=gene-blatn_trnI-GAU_1;gbkey=exon;gene=trnI-GAU
scaffold1|size138408	blatN	gene	63924	64944	69.5	+	1	ID=gene-blatn_trnI-GAU_2;gbkey=gene;gene=trnI-GAU;gene_biotype=tRNA;Note=blatN_hit_trnI-GAU_NC_036341.1%2C_position_1_-_72%2C_psl_score_69.5%2C_coverage_100.00%25%2C_match_100.00%25
scaffold1|size138408	blatN	tRNA	63924	63960	.	+	1	ID=trna-blatn_trnI-GAU_2;gbkey=tRNA;gene=trnI-GAU
scaffold1|size138408	blatN	tRNA	64910	64944	.	+	1	ID=trna-blatn_trnI-GAU_2;gbkey=tRNA;gene=trnI-GAU
scaffold1|size138408	blatN	exon	63924	63960	.	+	1	ID=blatn_trnI-GAU_2_exon_1;Parent=gene-blatn_trnI-GAU_2;gbkey=exon;gene=trnI-GAU
scaffold1|size138408	blatN	intron	63961	64909	.	+	1	ID=blatn_trnI-GAU_2_intron_1;Parent=gene-blatn_trnI-GAU_2;gbkey=intron;gene=trnI-GAU
scaffold1|size138408	blatN	exon	64910	64944	.	+	1	ID=blatn_trnI-GAU_2_exon_2;Parent=gene-blatn_trnI-GAU_2;gbkey=exon;gene=trnI-GAU
scaffold1|size138408	blatN	gene	97252	98742	99.6	-	1	ID=gene-blatn_rrn16_1;gbkey=gene;gene=rrn16;gene_biotype=rRNA;Note=blatN_hit_rrn16_NC_036341.1%2C_position_1_-_1491%2C_psl_score_99.6%2C_coverage_100.00%25%2C_match_99.53%25
scaffold1|size138408	blatN	rRNA	97252	98742	.	-	1	ID=rrna-blatn_rrn16_1;gbkey=rRNA;gene=rrn16
scaffold1|size138408	blatN	gene	62137	63627	99.6	+	1	ID=gene-blatn_rrn16_2;gbkey=gene;gene=rrn16;gene_biotype=rRNA;Note=blatN_hit_rrn16_NC_036341.1%2C_position_1_-_1491%2C_psl_score_99.6%2C_coverage_100.00%25%2C_match_99.53%25
scaffold1|size138408	blatN	rRNA	62137	63627	.	+	1	ID=rrna-blatn_rrn16_2;gbkey=rRNA;gene=rrn16
scaffold1|size138408	blatN	gene	92037	94846	99.5	-	1	ID=gene-blatn_rrn23_1;gbkey=gene;gene=rrn23;gene_biotype=rRNA;Note=blatN_hit_rrn23_NC_036341.1%2C_position_1_-_2810%2C_psl_score_99.5%2C_coverage_100.00%25%2C_match_99.43%25
scaffold1|size138408	blatN	rRNA	92037	94846	.	-	1	ID=rrna-blatn_rrn23_1;gbkey=rRNA;gene=rrn23
scaffold1|size138408	blatN	gene	66033	68842	99.5	+	1	ID=gene-blatn_rrn23_2;gbkey=gene;gene=rrn23;gene_biotype=rRNA;Note=blatN_hit_rrn23_NC_036341.1%2C_position_1_-_2810%2C_psl_score_99.5%2C_coverage_100.00%25%2C_match_99.43%25
scaffold1|size138408	blatN	rRNA	66033	68842	.	+	1	ID=rrna-blatn_rrn23_2;gbkey=rRNA;gene=rrn23
scaffold1|size138408	blatN	gene	91491	91611	99.2	-	1	ID=gene-blatn_rrn5_1;gbkey=gene;gene=rrn5;gene_biotype=rRNA;Note=blatN_hit_rrn5_NC_036341.1%2C_position_1_-_121%2C_psl_score_99.2%2C_coverage_100.00%25%2C_match_99.17%25
scaffold1|size138408	blatN	rRNA	91491	91611	.	-	1	ID=rrna-blatn_rrn5_1;gbkey=rRNA;gene=rrn5
scaffold1|size138408	blatN	gene	69268	69388	99.2	+	1	ID=gene-blatn_rrn5_2;gbkey=gene;gene=rrn5;gene_biotype=rRNA;Note=blatN_hit_rrn5_NC_036341.1%2C_position_1_-_121%2C_psl_score_99.2%2C_coverage_100.00%25%2C_match_99.17%25
scaffold1|size138408	blatN	rRNA	69268	69388	.	+	1	ID=rrna-blatn_rrn5_2;gbkey=rRNA;gene=rrn5
scaffold1|size138408	blatN	gene	12019	12685	71.7	-	1	ID=gene-blatn_trnV-UAC_1;gbkey=gene;gene=trnV-UAC;gene_biotype=tRNA;Note=blatN_hit_trnV-UAC_NC_036341.1%2C_position_1_-_74%2C_psl_score_71.7%2C_coverage_100.00%25%2C_match_98.65%25
scaffold1|size138408	blatN	tRNA	12019	12055	.	-	1	ID=trna-blatn_trnV-UAC_1;gbkey=tRNA;gene=trnV-UAC
scaffold1|size138408	blatN	tRNA	12649	12685	.	-	1	ID=trna-blatn_trnV-UAC_1;gbkey=tRNA;gene=trnV-UAC
scaffold1|size138408	blatN	exon	12019	12055	.	-	1	ID=blatn_trnV-UAC_1_exon_2;Parent=gene-blatn_trnV-UAC_1;gbkey=exon;gene=trnV-UAC
scaffold1|size138408	blatN	intron	12056	12648	.	-	1	ID=blatn_trnV-UAC_1_intron_1;Parent=gene-blatn_trnV-UAC_1;gbkey=intron;gene=trnV-UAC
scaffold1|size138408	blatN	exon	12649	12685	.	-	1	ID=blatn_trnV-UAC_1_exon_1;Parent=gene-blatn_trnV-UAC_1;gbkey=exon;gene=trnV-UAC
scaffold1|size138408	blatN	gene	127327	127398	98.7	+	1	ID=gene-blatn_trnR-UCU_1;gbkey=gene;gene=trnR-UCU;gene_biotype=tRNA;Note=blatN_hit_trnR-UCU_NC_036341.1%2C_position_1_-_72%2C_psl_score_98.7%2C_coverage_100.00%25%2C_match_98.61%25
scaffold1|size138408	blatN	tRNA	127327	127398	.	+	1	ID=trna-blatn_trnR-UCU_1;gbkey=tRNA;gene=trnR-UCU
scaffold1|size138408	blatN	gene	123840	123911	98.7	-	1	ID=gene-blatn_trnQ-UUG_1;gbkey=gene;gene=trnQ-UUG;gene_biotype=tRNA;Note=blatN_hit_trnQ-UUG_NC_036341.1%2C_position_1_-_72%2C_psl_score_98.7%2C_coverage_100.00%25%2C_match_98.61%25
scaffold1|size138408	blatN	tRNA	123840	123911	.	-	1	ID=trna-blatn_trnQ-UUG_1;gbkey=tRNA;gene=trnQ-UUG
scaffold1|size138408	blatN	gene	90501	90572	98.7	+	1	ID=gene-blatn_trnN-GUU_1;gbkey=gene;gene=trnN-GUU;gene_biotype=tRNA;Note=blatN_hit_trnN-GUU_NC_036341.1%2C_position_1_-_72%2C_psl_score_98.7%2C_coverage_100.00%25%2C_match_98.61%25
scaffold1|size138408	blatN	tRNA	90501	90572	.	+	1	ID=trna-blatn_trnN-GUU_1;gbkey=tRNA;gene=trnN-GUU
scaffold1|size138408	blatN	gene	70307	70378	98.7	-	1	ID=gene-blatn_trnN-GUU_2;gbkey=gene;gene=trnN-GUU;gene_biotype=tRNA;Note=blatN_hit_trnN-GUU_NC_036341.1%2C_position_1_-_72%2C_psl_score_98.7%2C_coverage_100.00%25%2C_match_98.61%25
scaffold1|size138408	blatN	tRNA	70307	70378	.	-	1	ID=trna-blatn_trnN-GUU_2;gbkey=tRNA;gene=trnN-GUU
scaffold1|size138408	blatN	gene	117545	120098	65.3	-	1	ID=gene-blatn_trnK-UUU_1;gbkey=gene;gene=trnK-UUU;gene_biotype=tRNA;Note=blatN_hit_trnK-UUU_NC_036341.1%2C_position_1_-_72%2C_psl_score_65.3%2C_coverage_100.00%25%2C_match_98.61%25
scaffold1|size138408	blatN	tRNA	117545	117579	.	-	1	ID=trna-blatn_trnK-UUU_1;gbkey=tRNA;gene=trnK-UUU
scaffold1|size138408	blatN	tRNA	120062	120098	.	-	1	ID=trna-blatn_trnK-UUU_1;gbkey=tRNA;gene=trnK-UUU
scaffold1|size138408	blatN	exon	117545	117579	.	-	1	ID=blatn_trnK-UUU_1_exon_2;Parent=gene-blatn_trnK-UUU_1;gbkey=exon;gene=trnK-UUU
scaffold1|size138408	blatN	intron	117580	120061	.	-	1	ID=blatn_trnK-UUU_1_intron_1;Parent=gene-blatn_trnK-UUU_1;gbkey=intron;gene=trnK-UUU
scaffold1|size138408	blatN	exon	120062	120098	.	-	1	ID=blatn_trnK-UUU_1_exon_1;Parent=gene-blatn_trnK-UUU_1;gbkey=exon;gene=trnK-UUU
scaffold1|size138408	blatN	gene	91836	91938	98.1	-	1	ID=gene-blatn_rrn4.5_1;gbkey=gene;gene=rrn4.5;gene_biotype=rRNA;Note=blatN_hit_rrn4.5_NC_036341.1%2C_position_1_-_103%2C_psl_score_98.1%2C_coverage_100.00%25%2C_match_98.06%25
scaffold1|size138408	blatN	rRNA	91836	91938	.	-	1	ID=rrna-blatn_rrn4.5_1;gbkey=rRNA;gene=rrn4.5
scaffold1|size138408	blatN	gene	68941	69043	98.1	+	1	ID=gene-blatn_rrn4.5_2;gbkey=gene;gene=rrn4.5;gene_biotype=rRNA;Note=blatN_hit_rrn4.5_NC_036341.1%2C_position_1_-_103%2C_psl_score_98.1%2C_coverage_100.00%25%2C_match_98.06%25
scaffold1|size138408	blatN	rRNA	68941	69043	.	+	1	ID=rrna-blatn_rrn4.5_2;gbkey=rRNA;gene=rrn4.5
scaffold1|size138408	blatN	gene	125049	125136	97.8	-	1	ID=gene-blatn_trnS-GCU_1;gbkey=gene;gene=trnS-GCU;gene_biotype=tRNA;Note=blatN_hit_trnS-GCU_NC_036341.1%2C_position_1_-_88%2C_psl_score_97.8%2C_coverage_100.00%25%2C_match_97.73%25
scaffold1|size138408	blatN	tRNA	125049	125136	.	-	1	ID=trna-blatn_trnS-GCU_1;gbkey=tRNA;gene=trnS-GCU
scaffold1|size138408	blatN	gene	115746	115819	97.3	-	1	ID=gene-blatn_trnH-GUG_1;gbkey=gene;gene=trnH-GUG;gene_biotype=tRNA;Note=blatN_hit_trnH-GUG_NC_036341.1%2C_position_1_-_74%2C_psl_score_97.3%2C_coverage_100.00%25%2C_match_97.30%25
scaffold1|size138408	blatN	tRNA	115746	115819	.	-	1	ID=trna-blatn_trnH-GUG_1;gbkey=tRNA;gene=trnH-GUG
scaffold1|size138408	blatN	gene	12858	12930	97.3	+	1	ID=gene-blatn_trnM-CAU_1;gbkey=gene;gene=trnM-CAU;gene_biotype=tRNA;Note=blatN_hit_trnM-CAU_NC_036341.1%2C_position_1_-_73%2C_psl_score_97.3%2C_coverage_100.00%25%2C_match_97.26%25
scaffold1|size138408	blatN	tRNA	12858	12930	.	+	1	ID=trna-blatn_trnM-CAU_1;gbkey=tRNA;gene=trnM-CAU
scaffold1|size138408	blatN	gene	27067	27140	96.0	-	1	ID=gene-blatn_trnW-CCA_1;gbkey=gene;gene=trnW-CCA;gene_biotype=tRNA;Note=blatN_hit_trnW-CCA_NC_036341.1%2C_position_1_-_74%2C_psl_score_96.0%2C_coverage_100.00%25%2C_match_95.95%25
scaffold1|size138408	blatN	tRNA	27067	27140	.	-	1	ID=trna-blatn_trnW-CCA_1;gbkey=tRNA;gene=trnW-CCA
scaffold1|size138408	blatN	gene	126753	126800	100.0	+	1	ID=gene-blatn_trnG-UCC_1;gbkey=gene;gene=trnG-UCC;gene_biotype=tRNA;Note=blatN_hit_trnG-UCC_NC_036341.1%2C_position_24_-_71%2C_psl_score_100.0%2C_coverage_67.61%25%2C_match_67.61%25
scaffold1|size138408	blatN	tRNA	126753	126800	.	+	1	ID=trna-blatn_trnG-UCC_1;gbkey=tRNA;gene=trnG-UCC
scaffold1|size138408	blatX	gene	113529	113810	99.0	+	1	ID=gene-blatx_rpl23_1;gbkey=gene;gene=rpl23;gene_biotype=protein_coding;Note=blatX_hit_rpl23_NC_036341.1%2C_position_1_-_282%2C_psl_score_99.0%2C_coverage_100.00%25%2C_match_98.94%25
scaffold1|size138408	blatX	CDS	113529	113810	.	+	1	ID=cds-blatx_rpl23_1;gbkey=CDS;gene=rpl23
scaffold1|size138408	blatX	gene	47069	47350	99.0	-	1	ID=gene-blatx_rpl23_2;gbkey=gene;gene=rpl23;gene_biotype=protein_coding;Note=blatX_hit_rpl23_NC_036341.1%2C_position_1_-_282%2C_psl_score_99.0%2C_coverage_100.00%25%2C_match_98.94%25
scaffold1|size138408	blatX	CDS	47069	47350	.	-	1	ID=cds-blatx_rpl23_2;gbkey=CDS;gene=rpl23
scaffold1|size138408	blatX	gene	101741	102208	98.8	+	1	ID=gene-blatx_rps7_1;gbkey=gene;gene=rps7;gene_biotype=protein_coding;Note=blatX_hit_rps7_NC_036341.1%2C_position_1_-_468%2C_psl_score_98.8%2C_coverage_100.00%25%2C_match_98.72%25
scaffold1|size138408	blatX	CDS	101741	102208	.	+	1	ID=cds-blatx_rps7_1;gbkey=CDS;gene=rps7
scaffold1|size138408	blatX	gene	58671	59138	98.8	-	1	ID=gene-blatx_rps7_2;gbkey=gene;gene=rps7;gene_biotype=protein_coding;Note=blatX_hit_rps7_NC_036341.1%2C_position_1_-_468%2C_psl_score_98.8%2C_coverage_100.00%25%2C_match_98.72%25
scaffold1|size138408	blatX	CDS	58671	59138	.	-	1	ID=cds-blatx_rps7_2;gbkey=CDS;gene=rps7
scaffold1|size138408	blatX	gene	1793	2260	98.8	+	1	ID=gene-blatx_rps7_3;gbkey=gene;gene=rps7;gene_biotype=protein_coding;Note=blatX_hit_rps7_NC_036341.1%2C_position_1_-_468%2C_psl_score_98.8%2C_coverage_100.00%25%2C_match_98.72%25
scaffold1|size138408	blatX	CDS	1793	2260	.	+	1	ID=cds-blatx_rps7_3;gbkey=CDS;gene=rps7
scaffold1|size138408	blatX	gene	102525	104740	97.3	+	1	ID=gene-blatx_ndhB_1;gbkey=gene;gene=ndhB;gene_biotype=protein_coding;Note=blatX_hit_ndhB_NC_036341.1%2C_position_1_-_1533%2C_psl_score_97.3%2C_coverage_100.00%25%2C_match_98.63%25
scaffold1|size138408	blatX	CDS	102525	103301	.	+	1	ID=cds-blatx_ndhB_1;gbkey=CDS;gene=ndhB
scaffold1|size138408	blatX	CDS	103985	104740	.	+	1	ID=cds-blatx_ndhB_1;gbkey=CDS;gene=ndhB
scaffold1|size138408	blatX	exon	102525	103301	.	+	1	ID=blatx_ndhB_1_exon_1;Parent=gene-blatx_ndhB_1;gbkey=exon;gene=ndhB
scaffold1|size138408	blatX	intron	103302	103984	.	+	1	ID=blatx_ndhB_1_intron_1;Parent=gene-blatx_ndhB_1;gbkey=intron;gene=ndhB
scaffold1|size138408	blatX	exon	103985	104740	.	+	1	ID=blatx_ndhB_1_exon_2;Parent=gene-blatx_ndhB_1;gbkey=exon;gene=ndhB
scaffold1|size138408	blatX	gene	56139	58354	97.3	-	1	ID=gene-blatx_ndhB_2;gbkey=gene;gene=ndhB;gene_biotype=protein_coding;Note=blatX_hit_ndhB_NC_036341.1%2C_position_1_-_1533%2C_psl_score_97.3%2C_coverage_100.00%25%2C_match_98.63%25
scaffold1|size138408	blatX	CDS	56139	56894	.	-	1	ID=cds-blatx_ndhB_2;gbkey=CDS;gene=ndhB
scaffold1|size138408	blatX	CDS	57578	58354	.	-	1	ID=cds-blatx_ndhB_2;gbkey=CDS;gene=ndhB
scaffold1|size138408	blatX	exon	56139	56894	.	-	1	ID=blatx_ndhB_2_exon_2;Parent=gene-blatx_ndhB_2;gbkey=exon;gene=ndhB
scaffold1|size138408	blatX	intron	56895	57577	.	-	1	ID=blatx_ndhB_2_intron_1;Parent=gene-blatx_ndhB_2;gbkey=intron;gene=ndhB
scaffold1|size138408	blatX	exon	57578	58354	.	-	1	ID=blatx_ndhB_2_exon_1;Parent=gene-blatx_ndhB_2;gbkey=exon;gene=ndhB
scaffold1|size138408	blatX	gene	2577	4792	97.3	+	1	ID=gene-blatx_ndhB_3;gbkey=gene;gene=ndhB;gene_biotype=protein_coding;Note=blatX_hit_ndhB_NC_036341.1%2C_position_1_-_1533%2C_psl_score_97.3%2C_coverage_100.00%25%2C_match_98.63%25
scaffold1|size138408	blatX	CDS	2577	3353	.	+	1	ID=cds-blatx_ndhB_3;gbkey=CDS;gene=ndhB
scaffold1|size138408	blatX	CDS	4037	4792	.	+	1	ID=cds-blatx_ndhB_3;gbkey=CDS;gene=ndhB
scaffold1|size138408	blatX	exon	2577	3353	.	+	1	ID=blatx_ndhB_3_exon_1;Parent=gene-blatx_ndhB_3;gbkey=exon;gene=ndhB
scaffold1|size138408	blatX	intron	3354	4036	.	+	1	ID=blatx_ndhB_3_intron_1;Parent=gene-blatx_ndhB_3;gbkey=intron;gene=ndhB
scaffold1|size138408	blatX	exon	4037	4792	.	+	1	ID=blatx_ndhB_3_exon_2;Parent=gene-blatx_ndhB_3;gbkey=exon;gene=ndhB
scaffold1|size138408	blatX	gene	134603	134710	98.2	+	1	ID=gene-blatx_psbT_1;gbkey=gene;gene=psbT;gene_biotype=protein_coding;Note=blatX_hit_psbT_NC_036341.1%2C_position_1_-_108%2C_psl_score_98.2%2C_coverage_100.00%25%2C_match_98.15%25
scaffold1|size138408	blatX	CDS	134603	134710	.	+	1	ID=cds-blatx_psbT_1;gbkey=CDS;gene=psbT
scaffold1|size138408	blatX	gene	35011	35118	98.2	+	1	ID=gene-blatx_psbT_2;gbkey=gene;gene=psbT;gene_biotype=protein_coding;Note=blatX_hit_psbT_NC_036341.1%2C_position_1_-_108%2C_psl_score_98.2%2C_coverage_100.00%25%2C_match_98.15%25
scaffold1|size138408	blatX	CDS	35011	35118	.	+	1	ID=cds-blatx_psbT_2;gbkey=CDS;gene=psbT
scaffold1|size138408	blatX	gene	24962	25084	96.8	-	1	ID=gene-blatx_psbJ_1;gbkey=gene;gene=psbJ;gene_biotype=protein_coding;Note=blatX_hit_psbJ_NC_036341.1%2C_position_1_-_123%2C_psl_score_96.8%2C_coverage_100.00%25%2C_match_96.75%25
scaffold1|size138408	blatX	CDS	24962	25084	.	-	1	ID=cds-blatx_psbJ_1;gbkey=CDS;gene=psbJ
scaffold1|size138408	blatX	gene	26844	26957	96.5	+	1	ID=gene-blatx_petG_1;gbkey=gene;gene=petG;gene_biotype=protein_coding;Note=blatX_hit_petG_NC_036341.1%2C_position_1_-_114%2C_psl_score_96.5%2C_coverage_100.00%25%2C_match_96.49%25
scaffold1|size138408	blatX	CDS	26844	26957	.	+	1	ID=cds-blatx_petG_1;gbkey=CDS;gene=petG
scaffold1|size138408	blatX	gene	113829	115320	94.6	+	1	ID=gene-blatx_rpl2_1;gbkey=gene;gene=rpl2;gene_biotype=protein_coding;Note=blatX_hit_rpl2_NC_036341.1%2C_position_1_-_833%2C_psl_score_94.6%2C_coverage_98.80%25%2C_match_95.80%25
scaffold1|size138408	blatX	CDS	113829	114219	.	+	1	ID=cds-blatx_rpl2_1;gbkey=CDS;gene=rpl2
scaffold1|size138408	blatX	CDS	114888	115320	.	+	1	ID=cds-blatx_rpl2_1;gbkey=CDS;gene=rpl2
scaffold1|size138408	blatX	exon	113829	114219	.	+	1	ID=blatx_rpl2_1_exon_1;Parent=gene-blatx_rpl2_1;gbkey=exon;gene=rpl2
scaffold1|size138408	blatX	intron	114220	114887	.	+	1	ID=blatx_rpl2_1_intron_1;Parent=gene-blatx_rpl2_1;gbkey=intron;gene=rpl2
scaffold1|size138408	blatX	exon	114888	115320	.	+	1	ID=blatx_rpl2_1_exon_2;Parent=gene-blatx_rpl2_1;gbkey=exon;gene=rpl2
scaffold1|size138408	blatX	gene	45559	47050	94.6	-	1	ID=gene-blatx_rpl2_2;gbkey=gene;gene=rpl2;gene_biotype=protein_coding;Note=blatX_hit_rpl2_NC_036341.1%2C_position_1_-_833%2C_psl_score_94.6%2C_coverage_98.80%25%2C_match_95.80%25
scaffold1|size138408	blatX	CDS	45559	45991	.	-	1	ID=cds-blatx_rpl2_2;gbkey=CDS;gene=rpl2
scaffold1|size138408	blatX	CDS	46660	47050	.	-	1	ID=cds-blatx_rpl2_2;gbkey=CDS;gene=rpl2
scaffold1|size138408	blatX	exon	45559	45991	.	-	1	ID=blatx_rpl2_2_exon_2;Parent=gene-blatx_rpl2_2;gbkey=exon;gene=rpl2
scaffold1|size138408	blatX	intron	45992	46659	.	-	1	ID=blatx_rpl2_2_intron_1;Parent=gene-blatx_rpl2_2;gbkey=intron;gene=rpl2
scaffold1|size138408	blatX	exon	46660	47050	.	-	1	ID=blatx_rpl2_2_exon_1;Parent=gene-blatx_rpl2_2;gbkey=exon;gene=rpl2
scaffold1|size138408	blatX	gene	25227	25343	95.8	-	1	ID=gene-blatx_psbL_1;gbkey=gene;gene=psbL;gene_biotype=protein_coding;Note=blatX_hit_psbL_NC_036341.1%2C_position_1_-_117%2C_psl_score_95.8%2C_coverage_100.00%25%2C_match_95.73%25
scaffold1|size138408	blatX	CDS	25227	25343	.	-	1	ID=cds-blatx_psbL_1;gbkey=CDS;gene=psbL
scaffold1|size138408	blatX	gene	116174	117235	95.7	-	1	ID=gene-blatx_psbA_1;gbkey=gene;gene=psbA;gene_biotype=protein_coding;Note=blatX_hit_psbA_NC_036341.1%2C_position_1_-_1062%2C_psl_score_95.7%2C_coverage_100.00%25%2C_match_95.67%25
scaffold1|size138408	blatX	CDS	116174	117235	.	-	1	ID=cds-blatx_psbA_1;gbkey=CDS;gene=psbA
scaffold1|size138408	blatX	gene	25499	25750	95.7	-	1	ID=gene-blatx_psbE_1;gbkey=gene;gene=psbE;gene_biotype=protein_coding;Note=blatX_hit_psbE_NC_036341.1%2C_position_1_-_252%2C_psl_score_95.7%2C_coverage_100.00%25%2C_match_95.63%25
scaffold1|size138408	blatX	CDS	25499	25750	.	-	1	ID=cds-blatx_psbE_1;gbkey=CDS;gene=psbE
scaffold1|size138408	blatX	gene	27777	27911	94.9	+	1	ID=gene-blatx_psaJ_1;gbkey=gene;gene=psaJ;gene_biotype=protein_coding;Note=blatX_hit_psaJ_NC_036341.1%2C_position_1_-_135%2C_psl_score_94.9%2C_coverage_100.00%25%2C_match_94.81%25
scaffold1|size138408	blatX	CDS	27777	27911	.	+	1	ID=cds-blatx_psaJ_1;gbkey=CDS;gene=psaJ
scaffold1|size138408	blatX	gene	106390	113201	96.4	-	1	ID=gene-blatx_ycf2_1;gbkey=gene;gene=ycf2;gene_biotype=protein_coding;Note=blatX_hit_ycf2_NC_036341.1%2C_position_1_-_6875%2C_psl_score_96.4%2C_coverage_98.77%25%2C_match_94.81%25
scaffold1|size138408	blatX	CDS	106390	113201	.	-	1	ID=cds-blatx_ycf2_1;gbkey=CDS;gene=ycf2
scaffold1|size138408	blatX	gene	47678	54489	96.4	+	1	ID=gene-blatx_ycf2_2;gbkey=gene;gene=ycf2;gene_biotype=protein_coding;Note=blatX_hit_ycf2_NC_036341.1%2C_position_1_-_6875%2C_psl_score_96.4%2C_coverage_98.77%25%2C_match_94.81%25
scaffold1|size138408	blatX	CDS	47678	54489	.	+	1	ID=cds-blatx_ycf2_2;gbkey=CDS;gene=ycf2
scaffold1|size138408	blatX	gene	20444	20557	94.8	+	1	ID=gene-blatx_psaI_1;gbkey=gene;gene=psaI;gene_biotype=protein_coding;Note=blatX_hit_psaI_NC_036341.1%2C_position_1_-_114%2C_psl_score_94.8%2C_coverage_100.00%25%2C_match_94.74%25
scaffold1|size138408	blatX	CDS	20444	20557	.	+	1	ID=cds-blatx_psaI_1;gbkey=CDS;gene=psaI
scaffold1|size138408	blatX	gene	124756	124866	94.6	+	1	ID=gene-blatx_psbI_1;gbkey=gene;gene=psbI;gene_biotype=protein_coding;Note=blatX_hit_psbI_NC_036341.1%2C_position_1_-_111%2C_psl_score_94.6%2C_coverage_100.00%25%2C_match_94.59%25
scaffold1|size138408	blatX	CDS	124756	124866	.	+	1	ID=cds-blatx_psbI_1;gbkey=CDS;gene=psbI
scaffold1|size138408	blatX	gene	28801	29106	94.5	+	1	ID=gene-blatx_rps18_1;gbkey=gene;gene=rps18;gene_biotype=protein_coding;Note=blatX_hit_rps18_NC_036341.1%2C_position_1_-_306%2C_psl_score_94.5%2C_coverage_100.00%25%2C_match_94.44%25
scaffold1|size138408	blatX	CDS	28801	29106	.	+	1	ID=cds-blatx_rps18_1;gbkey=CDS;gene=rps18
scaffold1|size138408	blatX	gene	25370	25489	94.2	-	1	ID=gene-blatx_psbF_1;gbkey=gene;gene=psbF;gene_biotype=protein_coding;Note=blatX_hit_psbF_NC_036341.1%2C_position_1_-_120%2C_psl_score_94.2%2C_coverage_100.00%25%2C_match_94.17%25
scaffold1|size138408	blatX	CDS	25370	25489	.	-	1	ID=cds-blatx_psbF_1;gbkey=CDS;gene=psbF
scaffold1|size138408	blatX	gene	82259	82564	93.8	+	1	ID=gene-blatx_ndhE_1;gbkey=gene;gene=ndhE;gene_biotype=protein_coding;Note=blatX_hit_ndhE_NC_036341.1%2C_position_1_-_306%2C_psl_score_93.8%2C_coverage_100.00%25%2C_match_93.79%25
scaffold1|size138408	blatX	CDS	82259	82564	.	+	1	ID=cds-blatx_ndhE_1;gbkey=CDS;gene=ndhE
scaffold1|size138408	blatX	gene	135007	135228	93.7	+	1	ID=gene-blatx_psbH_1;gbkey=gene;gene=psbH;gene_biotype=protein_coding;Note=blatX_hit_psbH_NC_036341.1%2C_position_1_-_222%2C_psl_score_93.7%2C_coverage_100.00%25%2C_match_93.69%25
scaffold1|size138408	blatX	CDS	135007	135228	.	+	1	ID=cds-blatx_psbH_1;gbkey=CDS;gene=psbH
scaffold1|size138408	blatX	gene	35415	35636	93.7	+	1	ID=gene-blatx_psbH_2;gbkey=gene;gene=psbH;gene_biotype=protein_coding;Note=blatX_hit_psbH_NC_036341.1%2C_position_1_-_222%2C_psl_score_93.7%2C_coverage_100.00%25%2C_match_93.69%25
scaffold1|size138408	blatX	CDS	35415	35636	.	+	1	ID=cds-blatx_psbH_2;gbkey=CDS;gene=psbH
scaffold1|size138408	blatX	gene	36590	37235	93.9	+	1	ID=gene-blatx_petB_1;gbkey=gene;gene=petB;gene_biotype=protein_coding;Note=blatX_hit_petB_NC_036341.1%2C_position_3_-_648%2C_psl_score_93.9%2C_coverage_99.69%25%2C_match_93.52%25
scaffold1|size138408	blatX	CDS	36590	37235	.	+	1	ID=cds-blatx_petB_1;gbkey=CDS;gene=petB
scaffold1|size138408	blatX	gene	13581	15077	93.5	-	1	ID=gene-blatx_atpB_1;gbkey=gene;gene=atpB;gene_biotype=protein_coding;Note=blatX_hit_atpB_NC_036341.1%2C_position_1_-_1497%2C_psl_score_93.5%2C_coverage_100.00%25%2C_match_93.45%25
scaffold1|size138408	blatX	CDS	13581	15077	.	-	1	ID=cds-blatx_atpB_1;gbkey=CDS;gene=atpB
scaffold1|size138408	blatX	gene	132922	134448	93.4	+	1	ID=gene-blatx_psbB_1;gbkey=gene;gene=psbB;gene_biotype=protein_coding;Note=blatX_hit_psbB_NC_036341.1%2C_position_1_-_1527%2C_psl_score_93.4%2C_coverage_100.00%25%2C_match_93.32%25
scaffold1|size138408	blatX	CDS	132922	134448	.	+	1	ID=cds-blatx_psbB_1;gbkey=CDS;gene=psbB
scaffold1|size138408	blatX	gene	33330	34856	93.4	+	1	ID=gene-blatx_psbB_2;gbkey=gene;gene=psbB;gene_biotype=protein_coding;Note=blatX_hit_psbB_NC_036341.1%2C_position_1_-_1527%2C_psl_score_93.4%2C_coverage_100.00%25%2C_match_93.32%25
scaffold1|size138408	blatX	CDS	33330	34856	.	+	1	ID=cds-blatx_psbB_2;gbkey=CDS;gene=psbB
scaffold1|size138408	blatX	gene	134771	134902	93.2	-	1	ID=gene-blatx_pbf1_1;gbkey=gene;gene=pbf1;gene_biotype=protein_coding;Note=blatX_hit_pbf1_NC_036341.1%2C_position_1_-_132%2C_psl_score_93.2%2C_coverage_100.00%25%2C_match_93.18%25
scaffold1|size138408	blatX	CDS	134771	134902	.	-	1	ID=cds-blatx_pbf1_1;gbkey=CDS;gene=pbf1
scaffold1|size138408	blatX	gene	35179	35310	93.2	-	1	ID=gene-blatx_pbf1_2;gbkey=gene;gene=pbf1;gene_biotype=protein_coding;Note=blatX_hit_pbf1_NC_036341.1%2C_position_1_-_132%2C_psl_score_93.2%2C_coverage_100.00%25%2C_match_93.18%25
scaffold1|size138408	blatX	CDS	35179	35310	.	-	1	ID=cds-blatx_pbf1_2;gbkey=CDS;gene=pbf1
scaffold1|size138408	blatX	gene	30862	32886	89.0	-	1	ID=gene-blatx_clpP_1;gbkey=gene;gene=clpP;gene_biotype=protein_coding;Note=blatX_hit_clpP_NC_036341.1%2C_position_1_-_588%2C_psl_score_89.0%2C_coverage_100.00%25%2C_match_93.03%25
scaffold1|size138408	blatX	CDS	30862	31089	.	-	1	ID=cds-blatx_clpP_1;gbkey=CDS;gene=clpP
scaffold1|size138408	blatX	CDS	31679	31969	.	-	1	ID=cds-blatx_clpP_1;gbkey=CDS;gene=clpP
scaffold1|size138408	blatX	CDS	32818	32886	.	-	1	ID=cds-blatx_clpP_1;gbkey=CDS;gene=clpP
scaffold1|size138408	blatX	exon	30862	31089	.	-	1	ID=blatx_clpP_1_exon_3;Parent=gene-blatx_clpP_1;gbkey=exon;gene=clpP
scaffold1|size138408	blatX	intron	31090	31678	.	-	1	ID=blatx_clpP_1_intron_2;Parent=gene-blatx_clpP_1;gbkey=intron;gene=clpP
scaffold1|size138408	blatX	exon	31679	31969	.	-	1	ID=blatx_clpP_1_exon_2;Parent=gene-blatx_clpP_1;gbkey=exon;gene=clpP
scaffold1|size138408	blatX	intron	31970	32817	.	-	1	ID=blatx_clpP_1_intron_1;Parent=gene-blatx_clpP_1;gbkey=intron;gene=clpP
scaffold1|size138408	blatX	exon	32818	32886	.	-	1	ID=blatx_clpP_1_exon_1;Parent=gene-blatx_clpP_1;gbkey=exon;gene=clpP
scaffold1|size138408	blatX	gene	124263	124448	93.1	+	1	ID=gene-blatx_psbK_1;gbkey=gene;gene=psbK;gene_biotype=protein_coding;Note=blatX_hit_psbK_NC_036341.1%2C_position_1_-_186%2C_psl_score_93.1%2C_coverage_100.00%25%2C_match_93.01%25
scaffold1|size138408	blatX	CDS	124263	124448	.	+	1	ID=cds-blatx_psbK_1;gbkey=CDS;gene=psbK
scaffold1|size138408	blatX	gene	82822	83067	92.7	+	1	ID=gene-blatx_psaC_1;gbkey=gene;gene=psaC;gene_biotype=protein_coding;Note=blatX_hit_psaC_NC_036341.1%2C_position_1_-_246%2C_psl_score_92.7%2C_coverage_100.00%25%2C_match_92.68%25
scaffold1|size138408	blatX	CDS	82822	83067	.	+	1	ID=cds-blatx_psaC_1;gbkey=CDS;gene=psaC
scaffold1|size138408	blatX	gene	127536	129060	92.8	-	1	ID=gene-blatx_atpA_1;gbkey=gene;gene=atpA;gene_biotype=protein_coding;Note=blatX_hit_atpA_NC_036341.1%2C_position_1_-_1525%2C_psl_score_92.8%2C_coverage_99.48%25%2C_match_92.30%25
scaffold1|size138408	blatX	CDS	127536	129060	.	-	1	ID=cds-blatx_atpA_1;gbkey=CDS;gene=atpA
scaffold1|size138408	blatX	gene	15860	17279	93.4	+	1	ID=gene-blatx_rbcL_1;gbkey=gene;gene=rbcL;gene_biotype=protein_coding;Note=blatX_hit_rbcL_NC_036341.1%2C_position_1_-_1420%2C_psl_score_93.4%2C_coverage_98.82%25%2C_match_92.21%25
scaffold1|size138408	blatX	CDS	15860	17279	.	+	1	ID=cds-blatx_rbcL_1;gbkey=CDS;gene=rbcL
scaffold1|size138408	blatX	gene	38248	38743	93.0	+	1	ID=gene-blatx_petD_1;gbkey=gene;gene=petD;gene_biotype=protein_coding;Note=blatX_hit_petD_NC_036341.1%2C_position_5_-_500%2C_psl_score_93.0%2C_coverage_99.00%25%2C_match_92.02%25
scaffold1|size138408	blatX	CDS	38248	38743	.	+	1	ID=cds-blatx_petD_1;gbkey=CDS;gene=petD
scaffold1|size138408	blatX	gene	77041	78222	91.3	+	1	ID=gene-blatx_ndhH_1;gbkey=gene;gene=ndhH;gene_biotype=protein_coding;Note=blatX_hit_ndhH_NC_036341.1%2C_position_1_-_1176%2C_psl_score_91.3%2C_coverage_100.51%25%2C_match_92.01%25
scaffold1|size138408	blatX	CDS	77041	78222	.	+	1	ID=cds-blatx_ndhH_1;gbkey=CDS;gene=ndhH
scaffold1|size138408	blatX	gene	20995	21549	91.6	+	1	ID=gene-blatx_ycf4_1;gbkey=gene;gene=ycf4;gene_biotype=protein_coding;Note=blatX_hit_ycf4_NC_036341.1%2C_position_1_-_555%2C_psl_score_91.6%2C_coverage_100.00%25%2C_match_91.53%25
scaffold1|size138408	blatX	CDS	20995	21549	.	+	1	ID=cds-blatx_ycf4_1;gbkey=CDS;gene=ycf4
scaffold1|size138408	blatX	gene	23046	24008	91.2	+	1	ID=gene-blatx_petA_1;gbkey=gene;gene=petA;gene_biotype=protein_coding;Note=blatX_hit_petA_NC_036341.1%2C_position_1_-_963%2C_psl_score_91.2%2C_coverage_100.00%25%2C_match_91.17%25
scaffold1|size138408	blatX	CDS	23046	24008	.	+	1	ID=cds-blatx_petA_1;gbkey=CDS;gene=petA
scaffold1|size138408	blatX	gene	129122	130364	87.3	-	1	ID=gene-blatx_atpF_1;gbkey=gene;gene=atpF;gene_biotype=protein_coding;Note=blatX_hit_atpF_NC_036341.1%2C_position_1_-_540%2C_psl_score_87.3%2C_coverage_99.45%25%2C_match_90.61%25
scaffold1|size138408	blatX	CDS	129122	129517	.	-	1	ID=cds-blatx_atpF_1;gbkey=CDS;gene=atpF
scaffold1|size138408	blatX	CDS	130221	130364	.	-	1	ID=cds-blatx_atpF_1;gbkey=CDS;gene=atpF
scaffold1|size138408	blatX	exon	129122	129517	.	-	1	ID=blatx_atpF_1_exon_2;Parent=gene-blatx_atpF_1;gbkey=exon;gene=atpF
scaffold1|size138408	blatX	intron	129518	130220	.	-	1	ID=blatx_atpF_1_intron_1;Parent=gene-blatx_atpF_1;gbkey=intron;gene=atpF
scaffold1|size138408	blatX	exon	130221	130364	.	-	1	ID=blatx_atpF_1_exon_1;Parent=gene-blatx_atpF_1;gbkey=exon;gene=atpF
scaffold1|size138408	blatX	gene	13186	13584	92.5	-	1	ID=gene-blatx_atpE_1;gbkey=gene;gene=atpE;gene_biotype=protein_coding;Note=blatX_hit_atpE_NC_036341.1%2C_position_1_-_399%2C_psl_score_92.5%2C_coverage_97.79%25%2C_match_90.44%25
scaffold1|size138408	blatX	CDS	13186	13584	.	-	1	ID=cds-blatx_atpE_1;gbkey=CDS;gene=atpE
scaffold1|size138408	blatX	gene	22128	22811	90.5	+	1	ID=gene-blatx_cemA_1;gbkey=gene;gene=cemA;gene_biotype=protein_coding;Note=blatX_hit_cemA_NC_036341.1%2C_position_7_-_690%2C_psl_score_90.5%2C_coverage_99.13%25%2C_match_89.71%25
scaffold1|size138408	blatX	CDS	22128	22811	.	+	1	ID=cds-blatx_cemA_1;gbkey=CDS;gene=cemA
scaffold1|size138408	blatX	gene	42227	42629	90.6	-	1	ID=gene-blatx_rpl16_1;gbkey=gene;gene=rpl16;gene_biotype=protein_coding;Note=blatX_hit_rpl16_NC_036341.1%2C_position_6_-_408%2C_psl_score_90.6%2C_coverage_98.77%25%2C_match_89.46%25
scaffold1|size138408	blatX	CDS	42227	42629	.	-	1	ID=cds-blatx_rpl16_1;gbkey=CDS;gene=rpl16
scaffold1|size138408	blatX	gene	41735	42103	88.9	-	1	ID=gene-blatx_rpl14_1;gbkey=gene;gene=rpl14;gene_biotype=protein_coding;Note=blatX_hit_rpl14_NC_036341.1%2C_position_1_-_369%2C_psl_score_88.9%2C_coverage_100.00%25%2C_match_88.89%25
scaffold1|size138408	blatX	CDS	41735	42103	.	-	1	ID=cds-blatx_rpl14_1;gbkey=CDS;gene=rpl14
scaffold1|size138408	blatX	gene	41092	41496	88.9	-	1	ID=gene-blatx_rps8_1;gbkey=gene;gene=rps8;gene_biotype=protein_coding;Note=blatX_hit_rps8_NC_036341.1%2C_position_1_-_405%2C_psl_score_88.9%2C_coverage_100.00%25%2C_match_88.89%25
scaffold1|size138408	blatX	CDS	41092	41496	.	-	1	ID=cds-blatx_rps8_1;gbkey=CDS;gene=rps8
scaffold1|size138408	blatX	gene	115381	115599	92.3	+	1	ID=gene-blatx_rps19_1;gbkey=gene;gene=rps19;gene_biotype=protein_coding;Note=blatX_hit_rps19_NC_036341.1%2C_position_1_-_219%2C_psl_score_92.3%2C_coverage_96.05%25%2C_match_88.60%25
scaffold1|size138408	blatX	CDS	115381	115599	.	+	1	ID=cds-blatx_rps19_1;gbkey=CDS;gene=rps19
scaffold1|size138408	blatX	gene	45280	45498	92.3	-	1	ID=gene-blatx_rps19_2;gbkey=gene;gene=rps19;gene_biotype=protein_coding;Note=blatX_hit_rps19_NC_036341.1%2C_position_1_-_219%2C_psl_score_92.3%2C_coverage_96.05%25%2C_match_88.60%25
scaffold1|size138408	blatX	CDS	45280	45498	.	-	1	ID=cds-blatx_rps19_2;gbkey=CDS;gene=rps19
scaffold1|size138408	blatX	gene	40489	40602	88.6	-	1	ID=gene-blatx_rpl36_1;gbkey=gene;gene=rpl36;gene_biotype=protein_coding;Note=blatX_hit_rpl36_NC_036341.1%2C_position_1_-_114%2C_psl_score_88.6%2C_coverage_100.00%25%2C_match_88.60%25
scaffold1|size138408	blatX	CDS	40489	40602	.	-	1	ID=cds-blatx_rpl36_1;gbkey=CDS;gene=rpl36
scaffold1|size138408	blatX	gene	83202	84703	88.1	+	1	ID=gene-blatx_ndhD_1;gbkey=gene;gene=ndhD;gene_biotype=protein_coding;Note=blatX_hit_ndhD_NC_036341.1%2C_position_1_-_1503%2C_psl_score_88.1%2C_coverage_99.93%25%2C_match_87.96%25
scaffold1|size138408	blatX	CDS	83202	84703	.	+	1	ID=cds-blatx_ndhD_1;gbkey=CDS;gene=ndhD
scaffold1|size138408	blatX	gene	38847	39878	87.2	-	1	ID=gene-blatx_rpoA_1;gbkey=gene;gene=rpoA;gene_biotype=protein_coding;Note=blatX_hit_rpoA_NC_036341.1%2C_position_1_-_1020%2C_psl_score_87.2%2C_coverage_101.18%25%2C_match_87.94%25
scaffold1|size138408	blatX	CDS	38847	39878	.	-	1	ID=cds-blatx_rpoA_1;gbkey=CDS;gene=rpoA
scaffold1|size138408	blatX	gene	81494	82024	87.8	+	1	ID=gene-blatx_ndhG_1;gbkey=gene;gene=ndhG;gene_biotype=protein_coding;Note=blatX_hit_ndhG_NC_036341.1%2C_position_1_-_531%2C_psl_score_87.8%2C_coverage_100.00%25%2C_match_87.76%25
scaffold1|size138408	blatX	CDS	81494	82024	.	+	1	ID=cds-blatx_ndhG_1;gbkey=CDS;gene=ndhG
scaffold1|size138408	blatX	gene	43961	44623	86.7	-	1	ID=gene-blatx_rps3_1;gbkey=gene;gene=rps3;gene_biotype=protein_coding;Note=blatX_hit_rps3_NC_036341.1%2C_position_1_-_657%2C_psl_score_86.7%2C_coverage_100.91%25%2C_match_87.67%25
scaffold1|size138408	blatX	CDS	43961	44623	.	-	1	ID=cds-blatx_rps3_1;gbkey=CDS;gene=rps3
scaffold1|size138408	blatX	gene	80640	81104	89.9	+	1	ID=gene-blatx_ndhI_1;gbkey=gene;gene=ndhI;gene_biotype=protein_coding;Note=blatX_hit_ndhI_NC_036341.1%2C_position_1_-_465%2C_psl_score_89.9%2C_coverage_97.48%25%2C_match_87.63%25
scaffold1|size138408	blatX	CDS	80640	81104	.	+	1	ID=cds-blatx_ndhI_1;gbkey=CDS;gene=ndhI
scaffold1|size138408	blatX	gene	28405	28604	88.0	+	1	ID=gene-blatx_rpl33_1;gbkey=gene;gene=rpl33;gene_biotype=protein_coding;Note=blatX_hit_rpl33_NC_036341.1%2C_position_2_-_201%2C_psl_score_88.0%2C_coverage_99.50%25%2C_match_87.56%25
scaffold1|size138408	blatX	CDS	28405	28604	.	+	1	ID=cds-blatx_rpl33_1;gbkey=CDS;gene=rpl33
scaffold1|size138408	blatX	gene	76663	76934	86.4	+	1	ID=gene-blatx_rps15_1;gbkey=gene;gene=rps15;gene_biotype=protein_coding;Note=blatX_hit_rps15_NC_036341.1%2C_position_1_-_272%2C_psl_score_86.4%2C_coverage_99.63%25%2C_match_86.08%25
scaffold1|size138408	blatX	CDS	76663	76934	.	+	1	ID=cds-blatx_rps15_1;gbkey=CDS;gene=rps15
scaffold1|size138408	blatX	gene	85034	86005	87.5	-	1	ID=gene-blatx_ccsA_1;gbkey=gene;gene=ccsA;gene_biotype=protein_coding;Note=blatX_hit_ccsA_NC_036341.1%2C_position_1_-_972%2C_psl_score_87.5%2C_coverage_100.00%25%2C_match_85.91%25
scaffold1|size138408	blatX	CDS	85034	86005	.	-	1	ID=cds-blatx_ccsA_1;gbkey=CDS;gene=ccsA
scaffold1|size138408	blatX	gene	29410	29754	88.2	-	1	ID=gene-blatx_rpl20_1;gbkey=gene;gene=rpl20;gene_biotype=protein_coding;Note=blatX_hit_rpl20_NC_036341.1%2C_position_1_-_345%2C_psl_score_88.2%2C_coverage_97.46%25%2C_match_85.88%25
scaffold1|size138408	blatX	CDS	29410	29754	.	-	1	ID=cds-blatx_rpl20_1;gbkey=CDS;gene=rpl20
scaffold1|size138408	blatX	gene	39953	40369	85.9	-	1	ID=gene-blatx_rps11_1;gbkey=gene;gene=rps11;gene_biotype=protein_coding;Note=blatX_hit_rps11_NC_036341.1%2C_position_1_-_417%2C_psl_score_85.9%2C_coverage_100.00%25%2C_match_85.85%25
scaffold1|size138408	blatX	CDS	39953	40369	.	-	1	ID=cds-blatx_rps11_1;gbkey=CDS;gene=rps11
scaffold1|size138408	blatX	gene	78269	80550	87.6	+	1	ID=gene-blatx_ndhA_1;gbkey=gene;gene=ndhA;gene_biotype=protein_coding;Note=blatX_hit_ndhA_NC_036341.1%2C_position_55_-_1095%2C_psl_score_87.6%2C_coverage_95.62%25%2C_match_85.30%25
scaffold1|size138408	blatX	CDS	78269	78775	.	+	1	ID=cds-blatx_ndhA_1;gbkey=CDS;gene=ndhA
scaffold1|size138408	blatX	CDS	80011	80550	.	+	1	ID=cds-blatx_ndhA_1;gbkey=CDS;gene=ndhA
scaffold1|size138408	blatX	exon	78269	78775	.	+	1	ID=blatx_ndhA_1_exon_1;Parent=gene-blatx_ndhA_1;gbkey=exon;gene=ndhA
scaffold1|size138408	blatX	intron	78776	80010	.	+	1	ID=blatx_ndhA_1_intron_1;Parent=gene-blatx_ndhA_1;gbkey=intron;gene=ndhA
scaffold1|size138408	blatX	exon	80011	80550	.	+	1	ID=blatx_ndhA_1_exon_2;Parent=gene-blatx_ndhA_1;gbkey=exon;gene=ndhA
scaffold1|size138408	blatX	gene	18162	19669	86.8	+	1	ID=gene-blatx_accD_1;gbkey=gene;gene=accD;gene_biotype=protein_coding;Note=blatX_hit_accD_NC_036341.1%2C_position_1_-_1505%2C_psl_score_86.8%2C_coverage_100.13%25%2C_match_82.47%25
scaffold1|size138408	blatX	CDS	18162	19669	.	+	1	ID=cds-blatx_accD_1;gbkey=CDS;gene=accD
scaffold1|size138408	blatX	gene	117860	119364	84.1	-	1	ID=gene-blatx_matK_1;gbkey=gene;gene=matK;gene_biotype=protein_coding;Note=blatX_hit_matK_NC_036341.1%2C_position_11_-_1533%2C_psl_score_84.1%2C_coverage_97.22%25%2C_match_80.10%25
scaffold1|size138408	blatX	CDS	117860	119364	.	-	1	ID=cds-blatx_matK_1;gbkey=CDS;gene=matK
scaffold1|size138408	blatX	gene	87024	89237	86.4	+	1	ID=gene-blatx_ndhF_1;gbkey=gene;gene=ndhF;gene_biotype=protein_coding;Note=blatX_hit_ndhF_NC_036341.1%2C_position_1_-_2253%2C_psl_score_86.4%2C_coverage_97.36%25%2C_match_79.38%25
scaffold1|size138408	blatX	CDS	87024	89237	.	+	1	ID=cds-blatx_ndhF_1;gbkey=CDS;gene=ndhF
scaffold1|size138408	blatX	gene	26596	26685	88.9	+	1	ID=gene-blatx_petL_1;gbkey=gene;gene=petL;gene_biotype=protein_coding;Note=blatX_hit_petL_NC_036341.1%2C_position_13_-_102%2C_psl_score_88.9%2C_coverage_88.24%25%2C_match_78.43%25
scaffold1|size138408	blatX	CDS	26596	26685	.	+	1	ID=cds-blatx_petL_1;gbkey=CDS;gene=petL
scaffold1|size138408	blatX	gene	44753	45094	83.7	-	1	ID=gene-blatx_rpl22_1;gbkey=gene;gene=rpl22;gene_biotype=protein_coding;Note=blatX_hit_rpl22_NC_036341.1%2C_position_24_-_365%2C_psl_score_83.7%2C_coverage_87.02%25%2C_match_72.77%25
scaffold1|size138408	blatX	CDS	44753	45094	.	-	1	ID=cds-blatx_rpl22_1;gbkey=CDS;gene=rpl22
scaffold1|size138408	blatX	gene	70718	76254	83.9	+	1	ID=gene-blatx_ycf1_1;gbkey=gene;gene=ycf1;gene_biotype=protein_coding;Note=blatX_hit_ycf1_NC_036341.1%2C_position_1_-_5621%2C_psl_score_83.9%2C_coverage_98.44%25%2C_match_66.72%25
scaffold1|size138408	blatX	CDS	70718	76254	.	+	1	ID=cds-blatx_ycf1_1;gbkey=CDS;gene=ycf1
scaffold1|size138408	blatX	gene	121455	122466	72.0	-	1	ID=gene-blatx_rps16_1;gbkey=gene;gene=rps16;gene_biotype=protein_coding;Note=blatX_hit_rps16_NC_036341.1%2C_position_1_-_150%2C_psl_score_72.0%2C_coverage_68.49%25%2C_match_58.90%25
scaffold1|size138408	blatX	CDS	121455	121565	.	-	1	ID=cds-blatx_rps16_1;gbkey=CDS;gene=rps16
scaffold1|size138408	blatX	CDS	122428	122466	.	-	1	ID=cds-blatx_rps16_1;gbkey=CDS;gene=rps16
scaffold1|size138408	blatX	exon	121455	121565	.	-	1	ID=blatx_rps16_1_exon_2;Parent=gene-blatx_rps16_1;gbkey=exon;gene=rps16
scaffold1|size138408	blatX	intron	121566	122427	.	-	1	ID=blatx_rps16_1_intron_1;Parent=gene-blatx_rps16_1;gbkey=intron;gene=rps16
scaffold1|size138408	blatX	exon	122428	122466	.	-	1	ID=blatx_rps16_1_exon_1;Parent=gene-blatx_rps16_1;gbkey=exon;gene=rps16
scaffold1|size138408	blatX	gene	6442	10046	96.6	-	1	ID=gene-blatx_ycf2-fragment_1;gbkey=gene;gene=ycf2-fragment;gene_biotype=protein_coding;Note=blatX_hit_ycf2-fragment_NC_036341.1%2C_position_3211_-_6875%2C_psl_score_96.6%2C_coverage_52.27%25%2C_match_50.41%25%2C_fragment_match_94.87%25
scaffold1|size138408	blatX	CDS	6442	10046	.	-	1	ID=cds-blatx_ycf2-fragment_1;gbkey=CDS;gene=ycf2-fragment
scaffold1|size138408	blatX	gene	89348	90161	94.7	-	1	ID=gene-blatx_ycf1-fragment_1;gbkey=gene;gene=ycf1-fragment;gene_biotype=protein_coding;Note=blatX_hit_ycf1-fragment_NC_036341.1%2C_position_1_-_802%2C_psl_score_94.7%2C_coverage_14.47%25%2C_match_13.65%25%2C_fragment_match_95.76%25
scaffold1|size138408	blatX	CDS	89348	90161	.	-	1	ID=cds-blatx_ycf1-fragment_1;gbkey=CDS;gene=ycf1-fragment
scaffold1|size138408	blatX	gene	30581	30694	94.8	-	1	ID=gene-trsp_rps12_1;gbkey=gene;gene=rps12;gene_biotype=protein_coding;Note=blatX_hit_rps12-fragment_NC_036341.1%2C_position_1_-_114%2C_psl_score_94.8%2C_coverage_30.65%25%2C_match_29.03%25%2C_fragment_match_94.74%25%25_blatX_hit_rps12_NC_036341.1%2C_position_114_-_372%2C_psl_score_88.9%2C_coverage_69.62%25%2C_match_67.20%25
scaffold1|size138408	blatX	gene	100892	101682	94.8	-	1	ID=gene-trsp_rps12_1;gbkey=gene;gene=rps12;gene_biotype=protein_coding;Note=blatX_hit_rps12-fragment_NC_036341.1%2C_position_1_-_114%2C_psl_score_94.8%2C_coverage_30.65%25%2C_match_29.03%25%2C_fragment_match_94.74%25%25_blatX_hit_rps12_NC_036341.1%2C_position_114_-_372%2C_psl_score_88.9%2C_coverage_69.62%25%2C_match_67.20%25
scaffold1|size138408	blatX	CDS	30581	30694	.	-	1	ID=cds-trsp_rps12_1;gbkey=CDS;gene=rps12
scaffold1|size138408	blatX	CDS	100892	101125	.	-	1	ID=cds-trsp_rps12_1;gbkey=CDS;gene=rps12
scaffold1|size138408	blatX	CDS	101658	101682	.	-	1	ID=cds-trsp_rps12_1;gbkey=CDS;gene=rps12
scaffold1|size138408	blatX	exon	100892	101125	.	+	1	ID=trsp_rps12_1_exon_2;Parent=gene-trsp_rps12_1;gbkey=exon;gene=rps12
scaffold1|size138408	blatX	exon	101658	101682	.	+	1	ID=trsp_rps12_1_exon_3;Parent=gene-trsp_rps12_1;gbkey=exon;gene=rps12
scaffold1|size138408	blatX	intron	101126	101657	.	+	1	ID=blatx_rps12_1_intron_1;Parent=gene-blatx_rps12_1;gbkey=intron;gene=rps12
scaffold1|size138408	blatX	gene	59197	59987	94.8	-	1	ID=gene-trsp_rps12_1;gbkey=gene;gene=rps12;gene_biotype=protein_coding;Note=blatX_hit_rps12-fragment_NC_036341.1%2C_position_1_-_114%2C_psl_score_94.8%2C_coverage_30.65%25%2C_match_29.03%25%2C_fragment_match_94.74%25%25_blatX_hit_rps12_NC_036341.1%2C_position_114_-_372%2C_psl_score_88.9%2C_coverage_69.62%25%2C_match_67.20%25
scaffold1|size138408	blatX	gene	30581	30694	94.8	-	1	ID=gene-trsp_rps12_1;gbkey=gene;gene=rps12;gene_biotype=protein_coding;Note=blatX_hit_rps12-fragment_NC_036341.1%2C_position_1_-_114%2C_psl_score_94.8%2C_coverage_30.65%25%2C_match_29.03%25%2C_fragment_match_94.74%25%25_blatX_hit_rps12_NC_036341.1%2C_position_114_-_372%2C_psl_score_88.9%2C_coverage_69.62%25%2C_match_67.20%25
scaffold1|size138408	blatX	CDS	59197	59221	.	-	1	ID=cds-trsp_rps12_1;gbkey=CDS;gene=rps12
scaffold1|size138408	blatX	CDS	59754	59987	.	-	1	ID=cds-trsp_rps12_1;gbkey=CDS;gene=rps12
scaffold1|size138408	blatX	CDS	30581	30694	.	-	1	ID=cds-trsp_rps12_1;gbkey=CDS;gene=rps12
scaffold1|size138408	blatX	exon	59754	59987	.	-	1	ID=trsp_rps12_1_exon_2;Parent=gene-trsp_rps12_1;gbkey=exon;gene=rps12
scaffold1|size138408	blatX	exon	59197	59221	.	-	1	ID=trsp_rps12_1_exon_3;Parent=gene-trsp_rps12_1;gbkey=exon;gene=rps12
scaffold1|size138408	blatX	intron	59222	59753	.	-	1	ID=blatx_rps12_2_intron_1;Parent=gene-blatx_rps12_2;gbkey=intron;gene=rps12
scaffold1|size138408	blatX	gene	30581	30694	94.8	-	1	ID=gene-trsp_rps12_1;gbkey=gene;gene=rps12;gene_biotype=protein_coding;Note=blatX_hit_rps12-fragment_NC_036341.1%2C_position_1_-_114%2C_psl_score_94.8%2C_coverage_30.65%25%2C_match_29.03%25%2C_fragment_match_94.74%25%25_blatX_hit_rps12_NC_036341.1%2C_position_114_-_372%2C_psl_score_88.9%2C_coverage_69.62%25%2C_match_67.20%25
scaffold1|size138408	blatX	gene	944	1734	94.8	-	1	ID=gene-trsp_rps12_1;gbkey=gene;gene=rps12;gene_biotype=protein_coding;Note=blatX_hit_rps12-fragment_NC_036341.1%2C_position_1_-_114%2C_psl_score_94.8%2C_coverage_30.65%25%2C_match_29.03%25%2C_fragment_match_94.74%25%25_blatX_hit_rps12_NC_036341.1%2C_position_114_-_372%2C_psl_score_88.9%2C_coverage_69.62%25%2C_match_67.20%25
scaffold1|size138408	blatX	CDS	30581	30694	.	-	1	ID=cds-trsp_rps12_1;gbkey=CDS;gene=rps12
scaffold1|size138408	blatX	CDS	944	1177	.	-	1	ID=cds-trsp_rps12_1;gbkey=CDS;gene=rps12
scaffold1|size138408	blatX	CDS	1710	1734	.	-	1	ID=cds-trsp_rps12_1;gbkey=CDS;gene=rps12
scaffold1|size138408	blatX	exon	944	1177	.	+	1	ID=trsp_rps12_1_exon_2;Parent=gene-trsp_rps12_1;gbkey=exon;gene=rps12
scaffold1|size138408	blatX	exon	1710	1734	.	+	1	ID=trsp_rps12_1_exon_3;Parent=gene-trsp_rps12_1;gbkey=exon;gene=rps12
scaffold1|size138408	blatX	intron	1178	1709	.	+	1	ID=blatx_rps12_3_intron_1;Parent=gene-blatx_rps12_3;gbkey=intron;gene=rps12
scaffold1|size138408	blatX	exon	30581	30694	.	-	1	ID=trsp_rps12_1_exon_1;Parent=gene-trsp_rps12_1;gbkey=exon;gene=rps12
