# Supplementary material for: Resolving Recalcitrant Clades in the Pantropical Ochnaceae: Insights From Comparative Phylogenomics of Plastome and Nuclear Genomic Data Derived From Targeted Sequencing
Source: Front Plant Sci. 2021 Feb 4;12:638650. doi: 10.3389/fpls.2021.638650 (PMC7890083; doi:10.3389/fpls.2021.638650)
Supplement: Supplementary Data 1 — Annotated de novo reference contig (Ouratea bahiensis) before and after removal of the inverted repeat (in different file formats). [file Data_Sheet_1.ZIP › size138408_GeSeqEdit100891.fasta]

>size138408_GeSeqEdit100891
AATAGAAAATACTAATACTAATATAATAGATAGAATAGAAAAGAACTGTCTTTTCTTTATACTTTCGCCGGTTCCGTTGCTACCGCGTGCTTTACGCAATCGATCGGATCATATAGATATCCCTTCAACACAACATAGGTCGTCGAAAGGATCTCGGAGACCCACCAAAGCACGAAAGCCAGGATCTTTCAGAAAAAGGATTCCTATTCGAAGAGTGCATAACCGCATGGATAAGCTCACACTAACCCGTCAATTTGGGATCCAATTCGGGATTTTCCTTGGGAGGTGTCGGGAAGGAATTGGAATGTAATAATATCGATTCATACAGATATAGAAGAATCTCTATTGATTCAAAGGCTGTACCTATAGGCCTATAGGATAGGGCTAGCGAAAGAGGAAAAAACCGAAGATTTCACATAGTACTTTTGATCGAAAAATCAATCTGATTTATTTCGTACCCTTCGCTCAGTGAGAAAATGGGTCAGATTCTACAGGATCAAACCTATGGGACTTAAGGAATGACGGAAGGGAATAAAAAAGAAATAAATAAAAATGAAGTAGAAGAGCCCAGATTCCAAATGAACAAATTCAAACTTGAAAAAAATCTTTCTGATTCTCGAAGAATGAGGGGCAAAGGGATTGATCGAGAAAGATCTCTTGTTCTTATTATAAGATCGTGATTGGATCCACATATGTTTGGTAAAAAGAAGAATCTTCTCCTTTGAGAATAATCAAAAAAAGAAAGTGTTCAATTGGAACATGAAAACGTGACTAAATTTGTCCTAGTTACTCTTGGGGACGGAGTGGATGAAGGGAGGAGCTTCTCGAACGAGGAAAGGGATCCAATGACTTCGAAAGAATTGAACGAGGAGCCGTATGAGGTGAAAATCTCATGTACGGTTCTGTAGAGTGGCAGTAAGGATGACTTATCTGTCAACTTTTCCACTATTACCCCCAAAAAACCAAACTCTGCCTTACGTAAAGTTGCCAGAGTACGATTAACCTCGGGATTTGAAATCACTGCTTATATACCCGGTATTGGCCATAATTTACAAGAGCATTCTGTAGTCTTAGTAAGAGGGGGAAGGGTTAAGGATTTACCCGGTGTGAGATATCACATTGTTCGAGGAACCCTAGATGCTGTCGGAGTAAAGGATCGTCAACAAGGGCGTTCTAGTGCGTTGTAGATTCTTATCCAAGACTTGTATCATTTGATGATGCCATGTGAATCGCTAGAAACATGTAAAGTGTATGGCTAACCCAATAACGAAAGTTTCGTAAGGGGACTGGAGCAGGCTACCATGAGACAAAAGATCTTCTTTACTAAAGAGATTCGGAACTCTTATATGTCCAAGGTCCAATATTGGAAGAATTTCAGAGGTTTTCCTTGACTTTGTCCGTGTCAACAAACAATTCGAAATGCCTCGACTTTTTTAGAGCAGGTCCGAGTCAAATAGCAATGATTCAAAGCACTTCTTTTTACACTTTTTCGGAAACCCAAGGACTCCATCGTATGGATATGTAAAATACAGGATTTCCAATCCTAGCAGGAAAAGGAGGGAAACGGATACTCAATTTAAAGTGAGTAAATAGAATTCCATACTCAATCTCATAGATACATATAGAATTCTGTGGAAAGCCGTATTCGATGAAAGTCGTATGTACGGCTTGGAGGGAGGTCTTTCATATCTTTCGAGATCCACCCTACAATATGGGGTCAAAAAGCCAAAATAAATGATTTTATTAGCCCTTATAAAAGGAAAACTGATTCTTGAGAACCCCTTGTACGCTCATGTCACGTCGAGGTACTGCAGAAGAAAAAACTGCAAAATCCGATCCAATTTATCGTAATCGATTAGTTAACATGTTGGTTAACCGTATTCTGAAACACGGAAAAAAATCATTGGCTTATCAAATTATCTATCGAGCCATGAAAAAGATTCAACAAAAGACAGAAACAAATCCACTATCTGTTTTACGTCAAGCAATACGTGGAGTAACTCCCGATATAGCAGTAAAAGCAAGACGTGTAGGCGGATCGACTCATCAAGTTCCCATTGAAATAGGATCCACACAAGGAAAAGCACTTGCCATTCGTTGGTTATTAGGGGCATCCCGAAAACGTCCGGGCCGAAATATGGCTTTCAAATTAAGTTCCGAATTAGTGGATGCTGCCAAAGGGAGTGGCGATGCCATACGCAAAAAGGAAGAGACTCATAGAATGGCGGAGGCAAATAGAGCTTTTGCGCATTTTCGTTAATCCATGAACAGGATCTATATAGACTCATGGAGCCATACATCTCGATCGGAAAAGAATCAATAGAAAAAGAAAGAATCGGAATTGATCGCTATATTTCTCGAAACAAACGAAAAGGAAACGAAAGATGAAACATAAATCATGGATCAATTAAGCCCTCTCGGGGACTTGCTTAAGATAAGAATAAAAAAAAGGTAAATACCATGGAATAAGGTTTGATCCTATTTATGGGGATTCCGTAAATATTCCATTCCAAAAAAAAAAAGAGAAAGTTCGAAACAATTGGGATTTTTTGGAGATTGGATGCAGTTACTAATTCATGATCTGGCATGTACAGAATGAAAACTTCATTCTCGATTCTACGAGAATTTTTATGAAAGCCTTTCATTTGCTTCTCTTCGATGGAAGTTTGATTTTCCCAGAATGTATCCTAATTTTTGGCCTAATTCTTCTTCTGATGATCGATTCAACTTCTGATCAAAAAGATATACCTTGGTTTTATTTCATCTCTTCAACAAGTTTAGTAATGAGTATAACGGCCCTATTGTTCCGATGGAGAGAAGAACCTATGATTAGCTTTTCGGGAAATTTCCAAACGAACAATTTCAACGAAATATTTCAATTTCTTATTTTACTATGTTCAACTCTATGTATTCCTCTATCCGTAGAGTACATTGAATGTACAGAAATGGCTATAACAGAGTTTCTCTTATTCGTATTAACAGCTACTCTAGGAGGAATGTTTTTATGCGGTGCTAACGATTTAATAACTATCTTTGTAGCTCCAGAATGTTTCAGTTTATGCTCCTACCTATTATCTGGATATACCAAGAAAGATGTACGGTCTAATGAGGCTACTATGAAATATTTACTCATGGGTGGGGCAAGCTCTTCTATTCTGGTTCATGGTTTCTCTTGGCTATATGGTTCGTCCGGGGGAGAGATCGAGCTTCAAGAAATAGTGAATGGTCTTATCAATACACAAATGTATAACTCCCCAGGAATTTCAATTGCGCTTATATTCATCACTGTAGGAATTGGGTTCAAGCTTTCCCTAGCCCCTTCTCATCAATGGACTCCTGACGTATACGAAGGAGTGCGGTTCGTTCGAAAAATTCCTACTTCTCTATCTATCTCTGAGATGCTTGGATTTTTCAAAACTCCATGGACATGCAGAAGAGAAATGCTATCCGCACTCGGACCAAGACATAACTTTTACTTGTTCAAATAACAATTAAGGTGAAGCAGCGTCAGGAACAACGAATCTCTTTATGATAAACAAGATTCATTTTGCAAGTTCGTTATTACGGGTAGCTCCTACAAAAGATCGGACTAATGACGTATACAATATTTAAATTCTCGATGTAGATGCTACATAGTTGGTTCTCATCCTTCAGAGACTACGAGTGTAATAGGAGCATCCGTCGACAAAAGGATCACCCTAAGATGATCATCTCATGGCTATTGAGAACGAATCAAATCAGATGGTTCTATTTCTCAATCTTTTCGACCTCTTGGTTCCGTAGGAGCAAGTCAGAAAGATTGAGAAAAATTGGTCATTCACAACCACTGATGAAGGATTCCTCGAAAAGTTAAGGATTAGTAATCCTTTTTAGAAATCGAATGGATTCGGTCTTATACATACGCGAGGAAGGTAATCAAAAAAGAAAGAAGATGAGTTCTTCTTTCTTTTATCACTTAGGAGCCGTGCGAGATGAAAGTCTCATGCACGGTTTTGAATGAGAGAAAGAAGTGAGGAATCCTCTTTTCGACTCTGACTCTCCCACTCCAGTCGTTGCTTTTCTTTCTGTTACTTCGAAAGTAGCTGCTTCAGCTTCAGCCACTCGAATTTTCGATATTCCTTTTTATTTCTCATCAAACGAATGGCATCTTCTTCTGGAAATCCTAGCTATTCTGAGCATGATAGTGGGGAATCTCATTGCTATTACTCAAACAAGCATGAAACGTATGCTTGCATATTCGTCCATAGGTCAAATCGGATATGTAATTATTGGAATCATTGTTGGAGACTCAAATGGTGGATATGCAAGCATGATAACTTATATCTTCTTCTATATCTCCATGAATCTAGGAACTTTTGCTTGCATTGTATTATTTGGTCTACGTACCGGAACTGATAACATTCGAGATTATGCAGGATTATACACGAAAGATCCTTTTTTGGCTCTCTCTTTAGCCCTATGTCTCTTATCCCTAGGAGGTCTTCCTCCACTAGCAGGTTTTTTCGGAAAACTCCATTTATTCTGGTGTGGATGGCAGGCAGGCCTATATTTCTTGGTTTCAATAGGACTCCTTACGAGCGTTGTTTCTATCTACTATTATCTAAAAATAATCAAGTTATTAATGACTGGACGAAACCAAGAAATAACCCCTCACGTGCGAAATTATAGAAGATCCCCTTTAAGATCAAACAATTCCATCGAATTGAGTATGATTGTATGTGTAATAGCATCTACTATACCAGGAATATCAATGAACCCGATTATTGAAATTGCTCAAGATACCCTTTTTTAGCTTCTAGAACCTATTTCTTAGTTCAAGATCCCTCTTACTAACTGGAATCAAAGAATTAGTAGATCTGTTCCGCCCAAAATGGGAATGGGCTAGGGTTATGAACTTATAATCTGATAATCGAGTCGATTCCATGATTATAAGTTCATTCCATACCGGACCAGACCGGAATAGGCTTATATACATTCTCATTATGAGAAGGGGTCATTCGAGCGTATCTAAATAGATACTATCGTATCTAAATAGATACTATGTTTACATATGGATCCCTCCGTCGTTACATTCCATTTAGGATTAGGAATAGGCGTAATCGGACCTGCTTTTTACATATATATCTCTCCTTATTTGGGACCCTATTCTATTCACCTCTTTGGGCGTCTATTGAATCGAGAAATGGGTTTGATTGTCCATTTTTTTGCTATAATTTTTTGCTATAATATATATATAAGGCATGTTCCGGATAATTCAAATCGAAGCAATTGGATGTCCGACTCGGGCCTATATGACATGAACGATCAATAGAAATACTCCAACACTCCACCTTTGTCATATATTCCATACATCACACTAGATAGATATCATATTCATGGAATACGATTCACTTTCAAGATGCCTTGGTGGTGAAATGGTAGACACGCGAGACTCAAAATCTCGTGCTAAAGAGCGTGGAGGTTCGAGTCCTCTTCAAGGCATAATATTGAGAATGCTCATTGAATTGGAATAAGTTCGGCAGCGGATCACGAAATCTTGGTGATCTTCTCTATCTAATGAATGGGGAGTCCGCTTTGAAATCGTTCGCCCTGCAACCACCCCCGAGTATATGCTTCAACAGGAATTACACAAGGGTAGATTGATACAATAGAAACCTCTGGTAAAATGCCCGCCCGTCACCCAACAGATAAAGTACATTACATAGTCCGTTTTAGGGATTGGCGACTTACCCATTCAGTGACTTTGGCACTGGATGGTCCCAAAAAAAAATGGGTACTATCGGGTCGGGTGAATTCAATAATAGGCGTCTGTTGGCATTCCATCCTTCCTTCTCCTTTCAGGGACTATCCGAAAGAGAATCCAGTACTTCTTGGTCGTGAATATCTGAATAGGACGAACCGCCCCGTGGATATCTTTGCTTCGGAACAAAACAATTAGAATTAGGCCCGGTCAACTGGAATGTGTATTATCCATATAGGGGATCTTCCAATTGAGAAGATCCATCGACCTGAGACGAAGAGAAGGGTCTATCTATTTTATTTAGTTATTCATTTAGTTATTCAGTTAAACCAATGATTCGTTATTGGAGCAGATAGCAACAACCACCATTTCATCCGACATACGTATTTTTGATTTTCCAATGGATTTACATCTTTCATTAATGGAAATTTTTTGATGTAGTGAGTAATAGCTCTGGTTGCTCGCTGTTCAAGAATTCTTGTTTAGGCAGTTCATACCATCCATACATAGTGTTTTGATCTAAGATTTCAATTCTTCCATGTTTCAGCAGTAACATATTCTTCCATGTCCAAAATATGGAAGAAAGAGGTGTTTCCACGACTTTACCACCCAGTCAATTCTGTTCCACTTAATCTCTATTTCATGGCCACATATCTTTCAGGCTAAGGAATGGGAAACCTTTCTCCTATTACATGAATCCAATTTCATCCGGGAAAAGCCATCTTTTTCTCAACAATGCCTTTGTCATTTGATCCAATAGCGTTCCGTTAGATAGGAACAGATTTGATAAATACTGATAACTCTCGGATAGAGTATTAGAACGGAAAAATCCATTAGATAATGAACTATTGGTTCTAAGCCATTTCTGGCGATGAATCAACAATTCGAAGTGCTTTTCTTGCGTATTCTTGATAAACCAGCGTTTATATATAGATGTAGGAGGATTGGTTTGGGAAGTAAGAAGCCCCTTTGACATCTCTTCATCTGCAAAGAATTCTTGATGTGAAAACACAGAGACAAAGGGGGGATCTTTGAATAGGAAAAAGAGTGGATCCGCAGGGTCCCAAATGAATTGGCTTATTCGAAAAAAGCCTTGTTCTTTGGAAGATCTATCTCCTGTCTGGTACTGCATGGTTCCACTCTGCAAGAACTCCGAATCGTTCTCTTGAAGCTCATCCTCTTCATCATAAATGATCCGCTTGTCCCGAAATGACCTGGCCCAATAGGGAAATCCCAATTCATTGGACCTTTCGATACAATCAAATAGAAAGCCCCAGGGGCGCCATATTCTAGGAGCCCAAACTATGTGATTGAATAAAACCTCCTCTATCTGTTGTGGATCGAGGACTCCTTCTCCTTCCCCTTCTTCAAACTCCGATTCGTATTTTTCATAGAGAAATCTCTGATCAAGGATAGAACAAGATCCATTTTGCATCATATCTAAGGGACTCCTTGGTTCGGGCCGAAGAAGCAATGTCACTCGATCATTATCAAACCGACTGCAATCTTTTTCTGTCCGTGAGGATCCCACCAGAGCGCCTTCTACTTCTAATAGGCCGTGAACTAGATCCGAATCATTTTCAACAAGTCCATAATAAGTGATCCCATTTTTTTCATCGGGTCCGGGTAGAGACCAAAGGTCTTGAGCAACCAATCCGGCAGAACAACTCAAAAGATAAAGAAGTATCGTCAATTTCTTCATGCTCGTTCCAAGTTCGAAGTACCATTTGTACAAATAAGAATCCCCTTCATTACATGATTTCTTCTTCATATAGATAGATATAGGATCTACGGGGCAATTACTTAGAAATACATTTTGTGCAACAGCCCTTCCTATCTGATAGAAAAGGATCCCATGATCCTGAACCGATCTTACCTGGGATCGCAAATCCCAAGTTTGTCTATGAAGAGCAGATCTAATTATATTAGTGTCTATAATTGATTTCTTCTGTGTAATACTAATTGATAGGGCCTCATTGGTAAGTGCTACAAGATCTCGTACATTGGAACCCATGGTTATGGACCCGAATCCATTAGTATGGAACATTTTCTTTTCCAAGTGAAATCCCCTAGTATATGAAAGAGTGAAAAAGTGCTTTCGTTGTTGTGGAATAAGAAGCCTTCGTATCTTAATGCATGTATTTAATTTATTCGGAGCTATTAGAGCGGGATCCACTTTTTGGGGAATATGAGTCGAAGCAATAACAAGAATATCTCTAGTGGAACATCTTTCACAATCCCTGGAGAGATAGTTCACTAATAGACCAAGGGATAAGTAATTCGACTCATTCACATCCAGATCATGAATGTTTGGAATCCATATTATGCAAGGAGACATTGCTTTTGCTAATTCGAATTGAAGGGTGATATAAAATCGGTCTATTTCCGGCATCATATCCATAGTTAGCGCATTCATCCTAGTTAGAAGCTCCAGCTCCGTATCAAGGTCACGGTCGAGATCGTCACTCACATCAATATCGTCACTATCATCAATAAGAAAACCCTTAGGCTTGTTATCCAGGAACTTGTTAAGAAATACTGTAATGAAAGGAACATAGGAGTTTGTCGCTAGGTATTTGACCAAATAGGATCGTCCAGTTCCTATAGAACCTATCACTAAAATACCCCTAGAGGGGGATAGGGCTAAGCGGAGCGAAAAGGGTTTTCCATGAGATGGGAAATGAAAACTATTCGCCCCACACGAGGTTTGTGAATAAGTGATTGTCTGATAATGAGCAAGGAATATCCGTCTTTCGGCTAAACAGGGTGTATTGAACTCATAATTCATTAGATACTTTTTATGAATGTCAACTAAGTATCGTAAGTAAATGGATCCCGGCTCTTCAATCATTTGATAACCAGAGTCATTCTTTGATAAATGATCACTATGAGTCAGACTCAATAGAATTTGATCAATCCTTTTTTCTGTCGTTAAGGTGGAGAACTGAACCAAGAATTCTCTTTCTTTATCATCAATTGAATCACTGTTCGCGACCAAGGATTCTATTTTATCATCAATCCAATCACCGTTCACGTTTTTTCTTTTTCTTATCAATGAATAAATCTCTTTACTTGTATGACTTAGATGTCTCGTATTTCTCGAAAAAGTGATTCGATTGATGGGATTTGGTATGATACTTATGAGATCGATGAGATTGATATTCAAAAATTTCTTCTTAGAACGTATTGATTTGACCCCATAAGCGGGACCACCACCCCATAGCATGTTGACGCCAGAAGCAGAACCCCGTATTTCTTCTAGAAAATCTCCTAATTGTTCCAGAGCAACTAGAAAGAGATTCTTTAACCAGAAAGAATTCAGTTCAGATGTAGGATACCTATCCAGAAGTTTTCGCAACTCAATCATGTATGATGGAATCATCAAAGATTTGACCTTTTCGAACTCTGTCTGTAACTCACTAGAGGCTCGGGAAACAAAGAGAAGATGTGTACGAACGAGATATCCAGCAACAAGAAGAAGGAAAAGGATTGAATAGAGGAACTCCCGAACGTTTGGCGATCTCAGATGTGTCGATATCAATGGTGACTCATTATTTCGATGAATCATTTCTTCGGACAGAAGAAGATTATGTAAACACTTACTCGAAATCTCGCTTATCAGATTCCATTGTGGAAGACACAATTTTTTCTGAAGAATTCGCCATGATATATCTAATCCATGCATAATATCATGAAAAATGGATACAAATTTTTGACTGCTACTTAGTATCGGTAATAGGTCTGAAAAGGTATCTAAAAATATCAAATTTAGATATTTGTACCCTGTCGAAGTAAGGAACCATGGCATATATGTTTGGAATAGATTCCATTTTGAGAGAGTTGAAAAAGCACTATCTCGTTGAAAGGTTCTATACATCTGCCCTTTTTCAACGCATTTCTTTAGACAAAGACTCCGTTTTTTCCTCTTTTCGGATGGTAAATCTTTCTCAGAACATGGAGTGTGAATCAAACCCATGTTTGAATTGAAATTGAGATACTGATGCAAGTTCTTCCCTTCTGAATCAGATAGATTCATATCCGAAAGAGGTTGACAATAAGTTCTTTCAAAATTGACTATTTGTCCCTCTGTTAGAGGTGTTCCAGAAATGTCTGCGATCGAATAAATAGCTCTACGAACGAATGGATCGGATCGAATTGGAAAATGGAAAGATTTGTACAAGTTATACCTTTCGTCACCACTTCGTGGAAAATCATTAGGTATGAATATGTTAGATACCTGTGACTCGATTGGTGAAATAGTATCTCTCTCCAAAAAAGCATGTTTTTTTTTACCGCCGCACAAAGACAAAGAGAATATTTTGTTGCGAATGAACAAGATATTGAGGAATTGTCCATACGTAAAATCATAATTCTTGATACGGGCCTTTTCCACATAAAAAGGGAATCTTTTGTTACAATAGAAGCAGAAGTGATGTAGATTATTCAAGAATCGAAGTCGATTTGCTTTATAAAAAGAAGATATCAATGAACTTCTATGAAATGGTTTTACGGGATTCAGCCAATTGTCTTGATCGTGGGATATCATTGAGAAATAGGAATCCGTGTTATCAAAAGATTTCCTGCGATTATTTCTAGTATGGAATGAGTCAATCATCCACTTTGGTATCTTATTGAACAAAAATGGTGATATTGTTCCTCCATTGATCAAAAATTTCGATTTTTGGGAAGTATCATGATCATCCAATAAGAAGGGTTTCCATTTTTTCAAATGAACGATTTGAAGACCTATTGGTTCTAACAGCTGATTACAGAGTTGATCATTCGGACCTTTGCAGTCGGCCAGAAGGTTGTTCCGTAGGTAATCAGCAATGGTTTCAAGGTCATACACCAACCTCTTAGATCTGGCGTCTGGTGATGCTCCAAATTTTTGCTGGGAAAGGAAGAGGTTGCCTCGAGTTGCAACTTTTGCTGGCGTTTTGTCTGAGCTGGATGATGAAACATGCAGTAGTGTTGGCTCTGATGCTCCTTCATCAGTATCTCAGGAGCGGATTATCATTGTGGGTAACCAACTTCCCCTTCGGTCCCATCGAAATCCAGATGGCAGTGGAGAGTGGTGCTTTAGCTGGGATGAGGACTCACTTCTTTTACAACTTAAAGATGGCCTAGGAGAGGATGTTGAAGTCATCTATGTCGGCTGTCTCAAAGAAGAGATTGACACTAGTGAGCAAGATGATGTGTCACAAATATTGCTCGAGGCTTTCAAATGTGTTCCTGCATTTATACCTCCTGACCTTTTCACTAAGTTCTACCATGGTTTCTGCAAGCAGCATCTCTGGCCTTTATTTCACTACATGCTTCCTCTATCACCCGATCTTGGTGGCCGCTTTGATCGGTCCCTTTGGCAGGCTTATGTTTCTGTCAACAAAATATTTGCAGACAAAGTAAAGGAAGTAATCAGCCCTGATGATGATTATGTGTGGGTTCATGACTACCATCTCATGGTTTTGCCCCCCTTAAAAAAAAAAAAAAAAAGAATTCCAAAAATTTTATTTTGAATTTATTAGTAATTTTTATTAGAAATTCATTATTCAAAATTGAAGAAATTGAAATTTATTTTTTAGTCTAGTTTCTATATATTTAATATTTACTTTCTATTTATAATGCTATTTATAATGTTTGATTGTATGTTTATAACTAGGATTATCAAAGTGAGGAGACTCCTTTCTTTTTGTCTATGTTTTCACGGTAAGAAAGGACTCCTTTGTTTTGTGCTTTACCGGGTAAGGTATACCAAGAAAAGCCTATTTGACAATGTTACCAATGAAAGGTGTCAAAGATCCTCATTTTTCCAACTCGAACTTACCAATAAATACAGTAAGTCGTTCCTAAACCCGTGTAACTTACTAGTGGATTCGATTTTGATTAGGTTAGATTGGAGCTTTTTTTTTAACCGTTATGATTTTGGCTCCAAAAATTCATTAGGTTTGGGTAGGTATTCCAAAGGCGAAGAAAAGAAGTATCACTAACTTTTTGATTGCCGAAAGGAAAGGAGGAAAATTCATATGTAATTGACCTACAAAGAGTAATGAAAAAAATTTGGTTTGTTTAGACAAGATTAGAAAAAATACGGATTGGATCTATTGAAATGCGCTTTTTTGTTTCATCTTTATGCTCGGCCCTGAATGATTCCTGTAAGCAGAATGCTTTTTCTTTTTCGATGAATCAAGCAAGCACAAGCGGCTAGTTATAAACAACAAAGAATACAATAATGAAGAACTGAAAACTATAAACTATACAATTTTTGTTTTCATTTTTTTTAGGGCTATACGGACTCGAACCGTAGACCTTCTCGGTAAAACAGGTCAAACTTTTTATTATCAAAATGATTCGAACTGTTTCAAAGACCCAACATGCATTTTTTGTTTTTTGCATTGAGCTCTTTCATTAACTGATAGAAATAATCGGTTAGTCTACCATAGTTCTCTTGACAGAAAGATAAGAAGATGGCTCCATGTGCTCTGATTTATTATGGATTCCGATCCGAGAGCACTACCAAAGTGTTTCAAAGAAGGGTTATCCTGACGTAGGTCTGCTTTTGGCTTAGATCAACCTAAGTTAAATGGAGTCTCCATCGCCCCGCTTCTGCTTAAAGAATCAAATATGAAACTTCATACACCTTAAAGTTCATAGGGATAGGATAGGACGAAAAGAGAATTTTTTGAAATCCTTATACTCAGCCTAGCATTGAATAGACTGGATATTTACCTTATCAATATCTTAAATCAATAATGGGTTCTCTTGAGTGCTGAAAAGAGCACTTAAATTAAACCGAATGTTTTGTCAGGCTATTGTTCTCTTGTTCCCTAAAAGTCATGGAGTAAGACATCAACTTCTGAATAAGTCTTTTAATTATATGATATACTTCTTTGAAAAACATTGACGCGCGTGTAAACGAGGTGCTCTACCTAACTGAGCTATAGCCCTTGTACTTGTGATACACATTTTATCATGTCGATAATTTCTTGTCAAGATAAAGATTACAAGGGCTAACATCCTATTTCTTTGATCTGCTTGTTTGGTATTGCTTATAAATAATATTCGATTTATAATCGATAGATGGGACGGGCTACCTTTTTTCTCTTTATGATGATAAAAGACCTACTTAACTCAGTGGTTAGAGTATTGCTTTCATACGGCGGGAGTCATTGGTTCAAATCCAATAGTAGGTAGAACTTATTAGATAGCAGAATCAATGGTATCTAATAAGTTTTGCTACCCACCTTTTCTTTTTATTTGATTGATTTTTGATCTTTTCCATTCCATTCTATTTCATTTTTGAATTGAAAAATTTTTCGTTGTATTAGAATCTGATTTGACTTATGATTCCAGTCAATTGGCAGAAAAAAATAGATGTATAAACGAAACCTCTGTTTATACAGAAGTTATTTTGATTATTCGGACACACCAACAACTAGTTATAGTTACGAAATCAGATTGATAGCCTCTACTCGTGCCTTAGCCCGTCTGAGAGCCAGATTGGCCTCAATTATTTGTCTCTTTCCTTCAGCTTTCCTCAAGTTTGCTTCGGCTATTTCAAGAGTTTGCTGAGCTTCTTGTGGATCAATGTCACTACCCCTCTCCGCATCATTTACTAAAACAGTAATCTCATTATTGCCTATTCTAGCAAAACCACCCATCAGAGCCATCGTTAACCATTCGTCGTTAAGGCGTATTCTCAAAATACCGATATCGACAGCAGTGGCAATAGGCGCGTGATTTGGTAATACGCCAATTTGTCCACTATTAGTAGATAAAATGATTTCTTTAACTTCTGAATCCCAAACAATTCGATTCGGGGTCAGTACACAAAGATTTAAGGTCATTTCTTCAAGTTGTTCTCCATTTCTAAATTCGTAGCCTTCGCAGTAGCTTCATCAATGTTACCTACCAAATAAAAGGCCTGTTCGGGAAGACTATCTAATTCTCCGGAAAGGATCAATTTAAAGCCTCTAATTGTTTCCACTAGACCAACATATTTTCCCGGAGAACCGGTAAATACTTCTGCTACAAAAAAGGGTTGTGATAAGAAACGCTCAATTTTTCGTGCTCTTGCTACAGTTAAGCGATCCTCTTCGGACAATTCGTCCAACCCAAGGATAGCTATAATGTCCTGAAGTTCTTTGTAACGTTGTAAAGTTTGCTTAACTCTTTGCGCAGTTTCATAATGTTCTTCACCAACGATCTGAGGTTGGAGCATAGTTGACGTTGAATCTAAAGGATCCACTGCTGGATAGATACCTTTAGCAGCTAATCCTCTTGATAGTACAGTAGTAGCATCTAAATGCGCAAATGTAGTGGCAGGAGCAGGGTCAGTCAAATCGTCCGCAGGTACATAAACTGCTTGAATAGAGGTTATGGACCCTTCTTTGGTCGAAGTAATTCTTTCTTGTAAAGAACCCATTTCGGTACTAAGGGTAGGTTGATAACCCACAGCAGAAGGCATTCTGCCCAATAAGGCGGATACTTCCGATCCCGCTTGGACGAAACGGAAGATATTGTCGATAAATAGAAGCACGTCTTGTTCATTAACATCTCGGAAGTATTCCGCCATAGTTAGGGCAGTCAAACCAACTCTCATACGAGCTCCCGGCGGTTCATTCATCTGACCATAGACTAGAGCCACTTTTGATTCTGCAATATTTTCTTCATTAATTACTCCAGATTCTTTCATTTCCATGTAAAGATCATTTCCTTCACGAGTACGTTCGCCTACTCCGCCAAATACGGATACACCCCCGTGAGCTTTCGCAATGTTGTTGATTAATTCCATAATTAGTACTGTTTTCCCCACTCCAGCCCCCCCGAATAGTCCGATTTTTCCTCCACGGCGATAAGGGGCTAAAAGATCTACTACTTTAATTCCGGTTTCAAAAATAGATAATTTTGTATCTAACTGTATAAAGGCAGGCGCAGATCTATGAATAGGGGATGTTGTGCGAGTATCTACAGGACCTAAATCATCAACGGGTTCTCCAAGCACATTGAAAATTCGTCCTAGAGTCGCCCCGCCGACTGGAACACTTAGAGGAGCTCCTGTGTCAATCACTTCTATTCCTCTCATTAGACCATCTGTAGCACTCATAGCTACAGCGCGAACTCGATTATTTCCTAATAATTGCTGTACTTCACAAGTCACATTAATTTGTTGACCGGCAGTATCTCGACCCTTAACTACCAGCGCGTTGTAAATATTAGGCATCTTGCCCGGGGGAAAAGTTACATCTAGCACCGGGCCAATGATTTGAGCGATACGCCCCAGGTTCTTTTTTTCAAGCGTGGAAACTCCAGGGTCAGAAGTAGTAGGATTGATTCTCATAATAATATAAAAACATGTCGAAATTTTTTTTTTTCGAAAATTTTCCAGTCCAAAAGAAATGTTCGATAACAAGTTGATCAATTAATTCAATAAGAAGTGGGAGTTAGCACTCAATTTCGTTTGTACCATCTAACGAATCCAATTTAATTGTTTACTTATTTTCAATTTCAATGAGTTAATTTTCAAGTTCAACTAACTCATTTTCAAAACAAAATAGAGATATCAAAATATATATATTAAGTGTATGAATAAAAAGGGCTTCAGGAAGCTTTTCATTTGTCTATCACTATAAACAATACTATCTATTTATGGAATTCGAACCTGAACTCTATTTATGATTCATTATTTCTATCTCATCGGTACTTTTTTCTTATTTAAACAGATCTAGTTACGCCTAGTTATTATTTTCTTTTTTTCCTAGACGAATTCCGCGGATTTTCACATTTACACCTTTTCACATTTAGGATTTACATATACAACATATATCACTGTCAAGAGGACATTTTTTTTATTATTTAGATATTTTGATTAAAAAAGTTAAGGATTTAGAAACTTGAAAAACAAGGGTTGCGCCATACATATGAAAGAGTATACAATAATGATGTATTTGGTGAATCAAATACCATGATCTAATGTCTAATAACGAAATTATGATTAGTTGATAATATTGGTTAATAATTTTGTGAAAGATTCCTGTGAAAGGGTTCATTCACTCCTAATTCATGTCGAGTAGACCTTGTTGCTGTGAGAATTCTTAATTCATGAGTTTTAGGGAGGGACTTATGTCACCACAAACAGAGACTAAAGCAACTGTTGGATTCAAGGCTGGTGTTAAAGATTATAAATTGACTTATTATACTCCTGACTATGAAACCAAAGATACTGATATCTTGGCAGCATTCCGAGTAACTCCTCAACCTGGAGTTCCGCCCGAGGAAGCAGGGGCTGCGGTAGCTGCTGAATCTTCTACTGGTACATGGACGACTGTGTGGACCGATGGACTTACCAGTCTTGATCGTTATAAAGGACGATGCTACCACATCGAGCCCGTTGCTGGAGAAGAAAATCAATATATTGCTTATGTAGCTTACCCTTTAGACCTTTTTGAAGAAGGTTCTGTTACTAACATGTTTACTTCCATTGTGGGTAATGTATTTGGGTTCAAAGCCCTACGCGCTCTACGTCTGGAGGATTTGCGAATCCCTACTGCTTATACTAAAACTTTCCAAGGACCGCCCCATGGTATCCAAGTTGAGAGAGATAAATTGAACAAGTATGGTCGTCCCCTATTGGGCTGTACTATTAAACCAAAATTGGGATTATCCGCTAAAAATTACGGTAGAGCTGTTTATGAATGTCTCCGCGGTGGACTTGATTTTACCAAAGATGATGAGAATGTGAACTCCCAACCATTTATGCGTTGGAGAGACCGTTTCGTATTTTGTGCCGAAGCAATTTATAAAGCACAGGCGGAAACGGGTGAAATCAAAGGACATTATTTTAATGCTACTGCGGGTACATGCGAAGAAATGATGAAAAGGGCTGTATTTGCCAGAGAATTGGGAGTTCCTATCGTAATGCATGACTACTTAACAGGAGGATTTACTGCAAATACTAGCTTGGCTCATTATTGCCGAGATAATGGTTTACTTCTTCACATCCATCGCGCAATGCATGCAGTTATTGATAGACAGAAGAATCATGGTATGCACTTTCGTGTACTAGCTAAGGCGTTACGTATGTCTGGTGGAGATCATGTTCACGCTGGTACCGTAGTAGGTAAACTTGAAGGGGAAAGAGACATCACTTTGGGCTTTGTTGATTTACTGCGCGATGATTTTATTGAAAAAGATCGAAGTCGCGGTATTTATTTCACTCAAGACTGGGTCTCTCTACCAGGTGTTCTGCCCGTGGCTTCAGGGGGTATTCACGTTTGGCATATGCCTGCTCTGACCGAGATCTTTGGAGATGATTCCGTACTACAATTTGGTGGAGGAACTTTAGGGCACCCTTGGGGAAATGCGCCCGGTGCCGTAGCTAATCGAGTAGCTCTAGAAGCATGTGTACAAGCTCGTAATGAGGGACGTGATCTTGCTCGTCAGGGTAATGAAATTATACGCGAGGCCAGCAAATGGAGTCCTGAACTAGCTGCTGCTTGTGAAGTATGGAAGGAGATTAAATTTGAATTTGAGGCAATGGATACAATTTGAGGCAATGGATACTTTGTAATCCACGTTTTTTCTTTTAATTGAATTCCAATTAAACTCGGCCCAATCTTTTACTAAAAGGATTGAGCCGAATATAAAGATCCTAATAAAAATAAAAAGGTCCTATTGTATATATTTTTGTATATATTTTTTATATTTTTGATATATTAGATATACAAGACCTTAAATACAAAAAAAAATAGAAGGCTAAACAACTCAAACCTTTCTATTCTTGTCTTGGATCCACACTTAATCCTAAGGATCTATAGGATTGATGTATTCTTTTATATCTATATCTCGTAGTTTCGGTCAAGGGTCGATCCAAGTATCACAACTTTGTCTACCCATCCTGTATATTGTCCTTTTCGTTCCTTATCCGTATTGGAATAGAAACGTATTAATAGGCGAGATTTTACCAAAAATTTTCTTCTTCATATTCCTAGGAGAAAAGAAAAAATTATTTTCTCGATGCAAATACGAATTTTACATAACATGACAAATTCCTATTTTATTTTTATATTTTGTTAGATATCTATTCTATTTAGATAGTTAGTTTAGAATTCTGATAATAGAATTCGAATATTTTATTATATTTAAGATTTCGTTTTTTAGTTTATATTAAAATTGAAATTAAATTAATTATTTAATATAAATATTCAATTTAAAATGAAAATTAAAAAATAATGGAAAGAAAATGGGGTTCCATCATAATCTTATTTTTTCCTACCCCTTACCTTATTCAATACCCAGTTAATAATCCTAGTGTTTGGATCCATATGCTTATTCTGCTCAGAAATGAAATATTCAAATGATTTTTTTTTTCATCGAATGACTATTCATCTATTTTTTTTGATATAAATAGTGGCAAGAAAGCTCTATGGAAAAATGGTGGTTCAATTCGATGCTATCTAACAGGAAGGTAGAATACAGGTGTAGGCTAAATAAATCAATGGATAATATTGGTCCTCTTGAAAATACCAGTATAAGTGAGGACCCTATTATAAATAAGACAGATAAAATAAATAAGACAGATAAAAACACCTATAATTGGAGTAATAGTGAGAGTTCTAGTTATTGTAATGTTGATCATTTAGTTGGCATTAGGGACATTCGGAATTTCAGTGCGGATGACACTTTTTTCGTTAGGGATAGTAATAGGAACAGTTATTCGATATATATTGATAATCCAATTTTTAAGATGAACAATGATCGTTCTTTTCTGAGTGAACTAGAAAGCTCTTTTTATATTTATTGGAATTCTAGTTCTCTGAATAATAGGTCTAGGGGTGACGGCCACTATGATCATTATATGTATGATACTAAATATAGTTGGAATAATTATATCAATAGTTGCATTGACAGTTATCTTCATTCTCAAATCTGTATTGATGGTTCTATTTTAAATGATAGTGACAATTACACCGAAAGTTACATTTATAGTTCTATTTGTGGTGAAAGTGAAAATAGGAGTGAAAACGAGAGTTCCGGTCTAAGAAGAAAAACGAATGGCAGCGATTTAACTAGAAAAGAAAGTTCTAATGATCGCGATGTCGCTCAAAAATACAGGCATTTGTGGATTCAATGTGAAATTTGTTATGCATTAAATTATAAAAAAATTTTGAAGTCAAGAATGAATATTTGTGAACAATGTGGATATCATTTGAAAATGAGTAGTTCAGATAGAATTGAATTTTCGATTGATCCAGGTACTTGGAATCCTATGAATGAAGACATGGTATCCCTGGATCCCATTGGATTTCATTCGGAGGAGGAACCTTATAAAGATCGTATTGATTCTTATCAAAGAAAGACAGGATTAACCGAGGCTGTTCAAACAGGCACAGGCCAACTAAACGGAATTCCCGTAGCAATTGGGGTTATGGATTTCCAGTTTATGGGGGGTAGTATGGGATCCGTAGTAGGCGAGAAAATTACTCGTTTGGTCGAGTATGCTACCAATAAATTTTTACCTCTTATTCTAGTGTGTGCTTCCGGAGGAGCTCGCATGCAAGAGGGAAGTTTGAGCTTGATGCAAATGGCTAAAATTTCTTCCGCTTTATATGATTATCAATCGAATAAAAAGTTATTTTATGTATCAATCCTTACATCTCCTACAACTGGTGGGGTGACCGCTAGTTTTGGTATGTTGGGAGATATCATTATTGCTGAACCCAATGCTTACATTGCGTTTGCGGGTAAAAGAGTAATTGAACAAACATTGAATAAGACAGTACCTGAAGGTTCCCAAGCGGCTGAATTTTTATTTCATAAAGGCTTATTTGATCCAATCGTACCACGTAATCTTTTAAAAGGGGTTCTGAATGAGTTATTTCAGCTCCACGCTTTTTTTCCTTTGAATTATAAATAAAATAAATAAATAAAGTAAAGTAGAGCTTAACTTAATTAATTCTAAATTGGTTTAATTATAAATAAGTTAACTAATTATTTGAGTTCGGCCGAACAAGTATTTATCGAAATCAAAGGAAAAACCCGAAGAATGCATTTTTTTTTGTGACGGAAGAGTAAATTGTAGAAAGTATCCTGTAGGTCTTTTTTTTTTTTTTTACCGATATTTCTGATTACTAATACTAATTAGGCAACCTCTATCGACAAACCAAGAGAAAAGAGTGCATTTTTTCTTATGCGAAATTGAATTTACAAGGTAAATAATAAATAAAACCAATTTCATGTTCTTTTCTTACCTCTGTATAGAAAATATAGAGTCTTGCATATATGGAGTCTTGCATATTTCTATATAGCTGTCGAAAATCCCTCTTTTACTAATATTTTAAATCCCTATTGTTCGATCGGATTATAAGGCACTTTTTCGGAAATTTATAAGCGGAAGAAGTTCTTTCTAAAATGAAAGTCAAATTAAAGTTATAAGACAAGAAAAAGATAATAAAAGAAGAATGAGAACTAAGTGGGTTATCATACATATAATTTATGTAGAAAAATGAAAGAGTCCATTTACCATTTAGTTAGTTCTACACTCCTTGTACTTTAATTATATATACTCACTTAGATATACTTAATCTAATTTTATACAAATTATATTATAATGATTATAAGATATCTTTCTAACAAAATAATAAAGCAATAACAGGTAAAAAGATTAATAAAAAATAGGTACAAATTTTAAATCGAGGTGCCCATTCTATGACAATTCTCAACAACTTACCCTCTATTTTTGTGCCTTTAGTGGGCTTAGTATTTCCGGCAATTGCAATGGCTTCTTTATCTCTTCATGTTCAAAAAAACAAGATTGTGTAGATCCGATGGGACCAAATCTCATCTATTTTTTTTTTTCAAGACTTAGACTTGGACCATAACACAGATATCTATTTAGTATAATATGGTATAATATGCGGCTTCCTTCAAAAAAAAAAACATAAATGAAAAAAGGGTTCTTATGCAGGCGTAATAAATAGGCTATATGAGTAAATAAGCTATTTGAAAAAAAAAATCGAGATTGGGGCGAATGCCTGAAATTGAAATAAAAGCAAAGCTAATGTATCTATATGTGTGTAAGTGTAAATAGGGGATTATATGAGGGGGCTCCTCTTATTTTAGATCTAACAAATTCAATGAATTCCCCCCTAAGATTTACATCAGAATAGTGCGAGTTGATAAAAGTTACTTTGGAAACAAAAAAAGTCAAATTCATTTGAGCTAGTCTCCCACTTCCAATAAAATTAACTGGATCTAGTATGAGTTGGCGATCAGAACGTATATGGATAGAACTTATAGCGGGATCTCGAAAAACAAGTAATTTTTTCTGGGCCTTTATACTTTTTTTAGGTTCCTTGGGTTTTTTATTGGTTGGAATTTCCAGTTATCTTGGAAGAAATTTAATATCTTTATTTCCGTATCAGCAAATCATTTTTTTCCCACAAGGGATGGTGATGTCTTTCTATGGCATTGCCGGTCTATTTATTAGCTCTTATTTGTGGTGCACAATTTCATGGAATGTAGGTAGTGGCTATGATCTATTTGATAGAATAGAAGGAATAGTGTGTATTTTTCGTTGGGGATTTCCTGGGAAAAATCGTCGCATCTTACTCCGATTCCTTATGAAAGATATTCAGTCTATCAGAATAGAAGTTAAAGAGGGTATTTATGCTCGGCGTGTCCTTTATATGGAAATCAGAGGGCAGGGGGCCATTCCTTTGACTCGTACTGATGAGAATTTGACTCCACGAGAAATTGAGCAAAAAGCGGCTGAATTGGCCTATTTCTTGCGTGTACCAATTGAAGTATTTTGATTAGATACAGATAGATCATATCTTGTAAATTATCCCCCCCCCTTTTTTTTTCAATCGACGTTTCTTTTTATCTGTGCTCCTTAATGAGCGTTGGACCAGTTCGAATGATAACTTTTCTGTTTTATTTGGCTTTTACCGCTCATTTTTGATCATCACAATATTCTTTCAGAAATCTATCTCACTTATTCCTGTGGAATATCGGCAGTTGACCAATTTTGTTTTCAAAATATTTTCTATTTTGATACAAAGGAATTCGTTCATCTCGAAATCTGAATTGGAAGTGGCTCTTTCGGGCATTCATCGAAAAGAGGGAATTGCTTCAAATTTGAGCAATTGAAATATCTGGAAAGAATAGGAATTTTTTGTTTCTTCATTCGTTTTTCTTAGGCCATTTCTGTATTCTTTCTAAATTCAAGAATTACCCACTGATTCACATATAAACAAATAAAAAAGAACTAGCTTCATAGGTTCGAAAGGGTCCGAAGCCTTGTAATAGAACTTATGCTTGATAGAAATATTCGATCATATAGAGTCGACGAATGGGATCGTTTCATTAAAAATTCACAGACAACAAAATGAAAAAAAAAACATTTATTCCCCTTCTATATCTTATATCTATAACCCTCTTGCCCTGGTGTATCTCTTTTTCATTTAATAAAAGTCTGGAATCTTGGATTATTAATTGGTGGAATACTAATAAATATGAAACTTTTTTAAATGATATTCACGAAAAGGGTATTCTAAAAAAATTCATAGAATTAGAGGAACTCTTACTGTTAGACGAAATGATAAAAGAATACCCCGAAACGCATCTACAAAAGTTTCCTATCGCAGTCCACAAAGAAACAATCCAATTGCTCAAGATGCATAATGAGCAGCGTATCCATACAATTTTGCACTTCTCGACAAATATAATCTCTTTCATTATTCTAAGTGTTTATTCTATTCTAGGTAATGAAGAACTTATTATTCTTAATTCTTGGGTTCAAGAATTCCTATATAACTTAAGTGACACAATAAAAGCTTTTTCTATTCTTTTATTAACCGATTTATGTATAGGATTCCATTCACCCCACGGTTGGGAATTAATGATTGGCTCTGTCTACAAAGATTTTGGATTTGCTCATAATGATCAAATTATATCTGGTCTTGTTTCCACTTTTCCAGTCATTATTGATACAATTTTTAAATATTGGATTTTCCATTATTTAAATCGTGTATCTCCGTCACTAGTAGTGATTTATCATTCAATGAATGACTGAAAAACGGTCCACCGATCAAATTAGAATGTTTGGTATTTTGTACATAAACAAAACATTCAAAATCTTACTTTTTTTTTTATTTTTATATAGTAATTTTTTCGATACATTCAAAAGATTCGGATTTTTCTTATATTTTAGAAAAATTTTTCAGTAAATAGCAGCATCGTGGATAGGGAACTATACTAGTAACCTACCTAATTTTATTGTAGAAATTTTCGGGATCAACGTTGGATCATGCAAACTAGAAGGACCCTTTCTTGGATAAAGGAAGAGATTACCCGCTCCATTTCCGTATCGCTCATGATATATATAATCACTCAGGCATCCATTTCCAAAGCATATCCCATTTTTGCACAGCAGGTTTATGAAAATCCACGCGAAGCAACTGGCCGTATTGTATGCGCCAATTGTCATTTAGCTAATAAGCCCGTGGATATTGAGGTTCCACAAGCGGTACTTCCTGATACTGTATTTGAAGCAGTTGTTCGAATTCCTTATGATATGCAACTGAAACAAGTTCTTGCTAATGGCAAAAAAGGAACTTTAAATGTAGGAGCTGTCCTTATTTTACCCGAGGGGTTTGAATTAGCCCCTCCCGATCGTATTTCGCCAGAGATGAAAGAAAAGATAGGTAATCTGTCTTTTCAGACTTATCGCCCCACTAAAAAAAATATTCTTGTGATTGGTCCTGTTCCTGGTCAGAAATATAGTGAAATCACCTTTCCTATTCTTTCTCCGAACCCTGCTACTAGGAAGAATATTCACTTCTTAAAATATCCCATATACGTAGGAGGAAACAGGGGAAGGGGGCAGATTTATCCCGACGGGAGCAAGAGTAATAATACGGTTTATAATGCTACAGCAGCAGGTATAGTAAGTAAAATTCTACGAAAAGAAAAAGGGGGGTATGAGATAACCATAACAGATCCGTCAGAGGGACGTCAAGTGATTGATATTATACCTCCAGGACCAGAACTTCTTGTTTCAGAAGGCGAATCCATCAAACTTGATCAACCATTAACGAGTAATCCTAATGTGGGTGGATTTGGTCAGGGGGATGCGGAAATAGTACTTCAAGACCCATTACGCGTTCAAGGCCTTTTGTTTTTCTTGGCATCTGTTATTTTAGCACAAATCTTTTTAGTTCTTAAAAAGAAACAGTTTGAGAAGGTTCAATTGTCCGAAATGAATTTCTAGATCTACGGATTTATCACCAGCAAGTTCTTAAAAAGAACACAATTTTTGTTGGCAATTATGTATGATCAAATTTTGACAAGCCTTTTTTTTTCTTTTCTTTCTATTTTTTTATACCAGATTTTGGGAATTACTTATACCGCATTTCTAGTCATAGTATGGATATTGGTAAAAAGGCTATTTTACTTTATCCCTTCTTTTGGTCTTTTTTAATCTAAATGGAAGCGGTCTGATTCTGTTACTATTGTCAGATTTCATAGAATGTATCACTTTTCTATTCGCATAGAATCCAATTCGACTAGATACTAATTCTTAGTCGTCGGCACAAGAAAGGGATTTTCTTGTGTCGAAATAATAATGATTCTTGATCTCATTTGTCAAAGATCCCTATTCTTAGTTTCTATCTATTTTTTCCAGGTTTATCATAATATCCCTTTCGATTTGAATTTTATATGTATAAATTTATTTATTACGTATAAAAACGTATAAAAAGTTAAAACCTAGTGGACAAAGAAAAAAGAAAGGGAAAATTTTTGAGCAAATAGAACTTCGAACTTCTAAAAAAATTGAAACTTTGATGAGATACTAAAAAAAAATAAAGTAAGGTTCTATTAGTATAGAAAAATTGGCATGCTATCGGATCGACCGAAACAAAATATATAACATAAATTAAATAGTATGATTATACCATCCAAGGGAAGGAAATCGAGTAATTACTTCGTTCTTATAACTTTGAAAGTAGTGATAGATACTATCGAGGAACAACTGTTTTGAGTCAATTAATGAAGTTACTTTTTCAAAAGCACCATCCAGAAAAAATTGGATGGAGTTTTTTGAAATATTTGAAATATGAGAGAGCTCAACGGGACCCCCGCCCTTTTTTCTCTCTTTGTTTTGATTGAGGGGGTTCGTTGAACTCTTACGCTTTCATGTCTACACTGCAGTTTATCCGATTATTACAGGGACGAACCCAATCCGGAATATGAACCATAAAAGAAAATGCCTATTAAACCAATCACAGGAATACCAGTTACAGTACCTATTATCCAAAGAGGAATCCTTCCAGTAGTATCGGCCATTTCTCTCACTTTCCTCCACATTTAATCAAGTGGTCATGCTAGAGACCTAAACAGTCATAGATAATTATGAGATGATATCCTTCCGATGGGGTAAGAGAATTTCTACTCTTATTTATTATTCTACTATTCTCTTTAGCTTCTATTAATTGAAGAAATAATTAGAAAATAAAACAGCAAGTACAAAAATGAGTAATAACCCCCAGTAGAGACTGGTACGATTCAATTCAACATTTTGTTCATTCGGGTTTGATTGTGTCATAGCTCTATAATTAATTCGAATTAGGTTTATCGTTGGATGAACTGCATTGCCGATATTGACCCCAAAAAAGAAACGGTAGGTACAGCTAATCCGTGAACAGCCAACCATCGTACTGTAAAAATTGGATAGGTTCGATCTATGGTCATTGGGGCCTCCTAAAAAGATCTACTAAATTCATCGAGTTGTTCCAAAGGATCAAAACGGCCAGTTATTAATGGAATTCCTTGTCGGCTCTCTGTAAAATATTCATTTGGGCGAGGGCTTCCAAAGACATCGTAAGCTAAACCCGTGCTTACGAATAACCAACCTGCAATGAATAGGGAAGGTATAGTAATGCTATGAATGACCCAATATCGAATACTGGTAATAATATCAGCAAACGAACGTTCTCCTGTGCTTCCAGACATGCTGAGCTCCATATATTCTTGTACAGTCAAAGGGGGATCCGTTTTGTAAACGATTGGATCAGTAAATGAAAATTTACTGGGATTCCGTCCTTGTGAGATCGTCAATATTGTACCAAGGGTTTTGTTAAAGTATACCGAATCAGTATAGCTATCCTTCTTCTGACGCAGCAATGCAACTTCAATCAGTATCGAAACGAAGCCCTAGATAATTTATTTCTTCTTTTCTTTTTCTTGTCGCTATAGAACCGTGTATGGAAAATTTGAATTCGACGAGTTGCTTTCTAATCTAATAATAATTCATGAATTGGAATCCTTTTTTTTTTCATTTTAAAGGAATTGGTTAGTCGTCCAGTATCAAGAACCGGCAGTAGAAAGTATTCGATGAAAGAAGGAGACGAGAACAACGAAAAAATAATTGTAATAATCAATATTCGTGATGTACGCATTCTTGTAGTAGATCAAAAAGGCCTTCTTGACATTTAACTACAAAGAGGGGTTTCCATTTTTTTTTTTTTAATATTCATTTTCTATTTTATTTCTCCAGAATTGTCCAACGAATCTCTTGATTCGGAATCACGTGAGGATAGGTGAATGTTTTAGATGATGAATGGATTTCTTTTTCTACTTATACCACTCTATTTTTGTTAGTGCCATCTATAGATAATAATATATAATTATCATGATTGATAAATAATTGATAAATTCAAAACTTTCAATTGAACGTATTCATTTAATATTGGTATGTATTTTTTTTATTCTTGTATCTTTCAAAAAATGGAACTTTAGGGAAGTACTTTATAACCATATGATATGTATAAAAAAGTTTATTTAGTTCTTTCATGCCTACTATAACTAGTTATTTCGGTTTTCTACTAGCGGCTTTAACTATAACCTCAGTTTTATTTATTGGTATGAGTAGGATACGACTTATTTGAAATGAATTGAATGAACAATTCATAAAAAAATATTTTTTTGGACTATTCCATCTCTAGTGTGTCAATTTCCAATTCTTGGTTATTGAGATTTATGGACAATATGGATTAATATTTAAGGATAGATATTACCTCTCTTTTCCCTTTAAACAAAAATTGAAATGATTGAAGTTTTTCTATTTGGAATCGTCTTAGGTCTAATTCCTATTACTTTAGCTGGATTATTCGTAACTGCATATTTACAATACAGACGTGGTGATCAGTTGGACTTTTAATTAATTAACATCGTACCTTTTTTGACCTCCTTTTAAATCCGCAGGAGGTCAAATTAGAGTAGATTGTTGTTCCATTTTTCTGTATAATTTTGACTTAACAAAACAGATTCACGCTCTGTAGGATTTGAACCTACGACATTAGGTTTTGGAGACCTACGTTCTACCGAACTGAACTAAGAGCGCTTTTTTTTATGACAAAGAATATAAGACTGTAAGGAAAAAGATTCTTTTTTTAACTCCAATACATCTTGAATGCATATATTATCCTATTCTATAGCATAATCATAATATAGAATAGGATAAAAATGAAAGATTAGGTATGTCCAATTTTAATTGATCTCAATTGATCCCCCGTTGTTGCTTAGAGACGAAGTAATAGGTAGGGATGACAGGATTTGAACCCGTGACATTTTGTACCCAAAACAAACGCGCTACCAAGCTGCGCTACATCCCTTTCAATTGGTCTACAATGTCATTGTATAGAATCCATGTATTGTTTTCCACATACTTATTTCATTTTCTTCATCGATATACACAACTTATCTTGCTATTTCTTCTTTTTGGTCTCATTAATAATAAACATATGAAAAAAAAGTATATGAAACCCGCCTTCGTGAATGTTTGGGTGGAAGCGGACTATTTTGTTCTTCTTAAGAAAAGGAAGATCTTATCTATCAAATCGTTGTACATTTCTATTTGAATTAGGGATTCCTACCACATACAAAACGAATGCAAGTGGCCTTGAATTACATAAACCTTAGATCATGTATGTATTATACAATAAACATTTTTTATTACACTAAAGAAGGAGGATTTAAAATGCGAGATTTCAAAACATATCTATCCGCGGCACCGGTAATAAGTACTATATGGTTCGGGTCTTTAGCAGGTCTATTGATAGAGATCAATCGTTTTTTCCCAGATGCGTTGACATTCCCCTTTTTTTCATTCTAGTTATTTACACGAGAGGGTGAAAAAAAAAGATTAGAGATAGAATTCAAAATTTGTGACTACTCTCCCCTTCCTCTTTTCTCTTTTTTTTTTAATTCCTTTTTTTTAGGATAAGTTAGAAAAGAGAAAGAATAAGTGGATTCAAACTTAGTGAAACTGGGACTTGGGTCTTGCCTTCAAGTAAATTAACTTTAAGTAAATTTACTTTAATCAAATTAAGAGAACAGAAGTTAAAATATGGTTAGCGCAACAGTATCATACAAGATGATTAAATGAAATACTGTCCTGCAATTCTAATCTAAACTTCTAATCAAAATAGAGTTTAAAATCATTGTATTACTTATTATTTTTTAATATATTGTTTGCAACAATAAAATTTCGTGAAATTTTATTTCGAGTTAACAACTTCTATTTTTTCCTTCCTTTCTTCTTCGTTTTGGATCAAAAAAAAAAAAAAGAGAAGAGTTGATTGGATAAAAAATCCAAAGGAGGTTCATGGCCAAGGGTAAAGATGCCCGAGTAAGGGTTATTTTGGAATGTACCGGTTGTGTTCGAAACAGTGTTAATAAGAAATCAACAGGCATTTCCCGATATATTACTCAAAAGAATCGACACAATACGCCTAGCCGATTGGAATTGAGAAAATTTTGTCCCTATTGTTACAAACATATGATTCACGGGGAAATAAAAAAATAAGTGGAACCGATCACCTACGCGTCACCTTTCCAAAGAAGATGAAAAATAACATTATAAGATATAATATGTTAATACTTAATATATATTTAATATATATAAATTAAAATAAAAATCCTATTTCTTAATTCTAAATCATTATCATTTTTGATCCAATCGAACGAAATAGGATTTTCGAAATAAGGAAAATAAACAAATCATGGATAAATCTAAGCGACTTTTTCTTAAGTCCAAGCGATCTTTTCGTAGGCGTTTGCCCCCGATCCAATCGGGGGAGCGAATTGATTATAGAAACATGAGTTTAATTAGTCGATTTATTAGTGAACAAGGAAAAATATTATCTAGACGGGTGAATAGATTGACTTTAAAACAACAACGATTAATTACTATTGCTATAAAACAAGCTCGTATTTTATCTTCGTTACCTTTTCTTAGTAATGAAAAACAATTTGAAAAAAGCGAGTTGGTCGTTAAAATGACTGGTCTTAGAACCAGAAAAAAATAGGCTTACTCTTCAATTGAATCAAAATTATAATCCGAACTCAAACGTAGATTGAAAGTTTTGTTCGAAAAATTCGAAAACCCAGATTTGATTGTCGTAAGAAAAAAACGAATTTTGGAAGAAGAAATCTTTTTTTTTATTGAATATTTTTGTTCAGTTTCACTACTTGATCATATTATGATCATATTTGATCATATTTTATCATACTAATTTCTATTCTATCCTCTCAGAATTCATTCTCCATCGAATTCCATGTAAATCATTCCGCGATGGATTCTTTTCAATCTCCTTATTTTTTGATTTTATAATGTCATTGCAAATCATATAAAGACAATTCCTATTTAATATGGCTATTTGCGCCAGTATTTTACGATTAAGAAGCAATTGTTTCTTGTATAGATTTTTTATTAATCTACTATAACTATAGGATGCCTTATTCTCACGAATTACTGCATTCATCCGAGTAATCCACAAACGACGAAAATCTCTTTTTTGCCCATCTCTATCCCGATGGGCCGAAAGCAAAGCTCTTATGTTTTGTTGGATAATAGTTCGAGTAAGTCTTGAATGAGCTCCGCGAAAGCTTGATGCGAATAAACGAATTTTTGTTCTACGCCTTCGAGCTATATATCCTCGTCTAATTCTGGTCATTGACTAAACGAAACTTTGATGAATAACTAATTGATTTCCTTTCTTTCAGTTATTCTTGTCCCCTTAATAACAAAACGGAATCCTCCAATGTATAAAATAACAATTCCAACGGCTTTTGCTACTATAACCTTCCCAACCACAATTTTTTTCTTTTTTTTCTTCTAGGCATTGTCGCCTAGAAGAAAAATTGTATTGATACTAAGTATTAAATAAAAAAATAGTAAATAAAATAGTAATAGTAAATAAAATAGTAAATAGAAATAGAAATGGATAAATAAATCATGGGTTCCGTCGTTTCTATGGTTACTTATTAAACGGTGAGGTCTTCTCTATACACCGGAGCCCCTTCCTTCATTGATTTTTTTAATCAAATAATCAATGTTATTATTAACTTGTACAGTTCACACTCTTTGGCTCTACTCATGAATTCGCTAGTAATAGGCCTTTCACAACGAAATTTATCTATACAGTAACGGTATTTAATTATGAAGATTAGCTGATTAGCTGACCTTCTTAGTCCGTTCTTACAAGAATAGGGGTATAATTTTTCGGCCTTTTAATTTAAATAAGATTTTCCCTGCTTAAGGTATAATCATTTACTACCAATAGGGAATTCTTTATCATTTTAAATGAAAATTTGAGGTGATTGAATTTCCACCAATAGAAAACATAAATTTAATACACAATAACAATAGAAGGGATATAATAGATCTTTTTTTAGATAGTGAAGGGGTTTTTTCTATCCTATCCATCTGTACTGATCATGGATAGTGGAAAAAATTGTTTCCTTTCTTTTGTCCTAACCCACGATCTGAACGAGTCGCACATACACCCTAGTACATGTTCCTCGCCGCTGAGGACATCCCCCAAGAGCGGGGGATTTGGTGACATTTCTGATTGGCTGTCTTGTGTTTCTAATAAGTTGTTTAATAGTTGGCATATTGAATTGTATGCATAATGGGCTGGTTTAGATCGATCCTAACCGGAAGATTATGAATTATTTATGAATTATTTCTAATAATATTAATAGAAGATTATTAGAATATTAAACCCGAGTAATAAAATCTCAAATTGTTTGTGCAATTTGCGTGAAATTACTGTTATTTTTTATGAAACTGCTACAAGATCAACAATTCCATGAGCTTGGGCTTCTGTTGCTGACATAAAAACATCCCTTTCCATGTCTTCGGATACGACCCCTAAGGGTTTGCCCGTTCTTAATGCATAAACCCGTGTGAGGATTTCGCGCAGTTTCAGTAGTTCTTCTGCTTCCAGGACAAATTCTCCTGTTTGTGCCTCATAAAAACCGGAAATAGGTTGATGGATCATTACCCTGATGATATAAGATAATAAAAGATTATTCTATCCCGAATTAGAAGGTGACGCGAAGAGATAAAGAATAATAAGAAAAAGGCTAGAATTGAACAACCGTACAGGCATTGTTTGCGGATTGCATACGGCTTCAGACTGGAATTCACTTTTACCTTTCGTCGAAGAAAAATATAGAGCTCAGATTGGTAAATGATCCAATAACCGCCCTTCCCTTGTGAGTAGTTAAAAAATACTACGGTGGCTCCGTTGCTTTATTTCATCGGTAATTTAGCAATCCCAAAGTTTCTTTTTTTTTTCGTACTCTTTCATAACTCATAAGACAAATAGTATTAAGAGCCCCTCGATGTGAAAACAAAAAGGTTTGTAACGCTGAAAAAGAACCCCGATGGAAAAGATAAAATCGGAAATCCCCTTACTATCTCATACTATTCTTTCGATATAGAATCGAATATTAAATTACAAAAAAAAAAGAAAAAAATTTCTTATATCGAATTCGAAATGCCATGCTATTATTACTTAATATTCATTCATATTTCATATGGCGAAGGCATAGTTTTCTTTGTTCTTTCAAATAAAAAACTCATTGGCGCCAAGCGTGCGGGAATGCTAGACGTTTAGTAATTTTTCCTCCGACCAGGATAAAAGATCCCATTGAAGCGGCCAATCCCATACATACTGTCTGTACATCTGGTTGCACAAATTGCATAGTATCATAGATAGCTATTCCAGGTATTACCCATCCGCCAGGAGAGTTTATAAACAAATACAAATCTTTAGTTTCACTCTCCATACTGAGATATACCATAAGACCAATAAGTTGATTTGAGATCTCGCTATCAACATCTTGACCTAAAAAAAGTAATCTCTCTCGATAAAGTCGATTGATTAGGATAAAATTATATCTCTTAGAAACCGTACATGCATCTTTTGCTGCATACGGTTCAACAAAAGTCGCGAAAAAAACAATCAATGTGTAGCTTCCAGTTCTCCTGTTTTTGATAGTGAGTACTTGCTAACTTCTCTTCTAATGAAGAGGTTGTTCTTCCATTTTTTTTTTCAAGAAAGAGGGGTTTTGACCCGTTTACCTATATATTTACCTATATATATAATTCATTAAATTAAACTTATCAAATTAACTTCTCATTGATGTATTCTTTCATCGAGATCTAATTCAAATCACGATGACATTTTCTTGTTCCTGAATGGGTTTCTTTAATTCTTCTTTAGGTTTGTGCTCTACTCCGTGTAAAGATCTGTCCGAATTTGGATTTGCCCGTATAGGGCAAATGCCCCCAAGACTCCGTCTTTTTGGTACAACTTCTTTTTTTTTAATTCATAGGACGGTTTCTGCCACAAATATTTGACGTATTCGGCATATTATTCGATTGATTATGAGTAGCGATTGGAAACTACTCCTATTTCTATTTTCCTATTTCTAATTTCTATTTTCCTATTTCTATTTATAAATAAATAAGTAGTAATGATAGATATATTAGTAATTGGTTTTTTATAAACGGAGCCTGGATACTTCATTTTTTTGGCCAACTAAGCTAACCATAAATTATTCTAATTGATAATATTAATCTGGATACCCCCAAAACATAGATGAACTTCACGCTCCAAATTTTTTATAATTAAATAAATCTTTCTTGGGTGAAACAGAGGATCTCTCGATCGGGGGAGAGAACGGGAAAATCCCGTATGACCCAATATATCTGACAAGGCGCACTATACGTCAATCCAAATTGAATCGTCTTCCCCAGGATTTCTAAAAGGCACTTTTGGAACACCAATAGGCATGAAATGAAAGCAAAAAATAAGTACTATATTTCACTTTGATGTGAAAGCGTAAGAATGAATTTATTGTCTTAATAATATTGGCCTTTATCATATGTTATGCGTGGATTCGGTAAGTTCATAAAAATAAAGGAAGACAAAGTAATAAAGTAAAATTCTTACTAATAGCTCCCTTGAATAATGAACAAATCTGTATGCAGTCGTTCATAGAAAATGGGGTCAATCCCCCATTGCGTATTGGTGCTTATCGGGTATAGAATAGATCTGCTTCTCCGTATTTCTCCAAACAGAATTGTTACATTGTTTGTTATTAAAAGAATAGAAAAAATAATAATCCTTTCTCAGAGATAATCCAATGAAAAAGGGGGGGGGTCCATAACATAGTTTTTTTTCCAGTGCAATAAAGTTACATAGTGTCTATTTTTCGTTGATAAAGGGGTATTTCTATGGGTTTGCCTTGGTATCGTGTTCATACTGTCGTATTGAATGATCCCGGTCGTTTGCTGTCTGTCCATATAATGCATACAGCTTTGGTTGCTGGTTGGGCCGGTTCGATGGCTCTATATGAATTAGCCGTTTTTGATCCCTCTGACCCTGTTCTTGATCCAATGTGGAGACAGGGTATGTTCGTTATACCCTTCATGACTCGTTTAGGAATAACCAATTCATGGGGTGGTTGGAGTATCACAGGAGGAACTATAACAAATCCGGGTATTTGGAGTTATGAAGGTGTGGCTGGGGCGCATATTGTCTTTTCGGGCTTGTGCTTCTTGGCAGCTATCTGGCATTGGGTATATTGGGATCTAGAAATCTTTTGTGATGAACGTACCGGAAAACCCTCTTTGGATTTGCCCAAGATCTTTGGAATTCATTTATTTCTATCAGGGGTGGCTTGTTTTGGGTTTGGCGCTTTTCATGTAACCGGATTGTATGGTCCTGGAATATGGGTGTCTGATCCTTACGGACTAACCGGAAAAGTACAATCTGTAAATCCAGCGTGGGGTGTGGAGGGTTTTGATCCTTTTGTTCCGGGAGGAATAGCCTCTCATCATATTGCAGCGGGGACGTTGGGCATATTAGCGGGCCTATTTCATCTTAGTGTCCGTCCGCCTCAACGTCTATACAAAGGATTACGTATGGGAAATATTGAAACCGTCCTTTCCAGCAGTATCGCTGCTGTCTTTTTTGCAGCTTTTGTTGTTGCTGGAACCATGTGGTATGGTTCAGCCACTACCCCCATTGAATTATTTGGTCCGACTCGTTATCAATGGGATCAAGGATACTTCCAGCAAGAAATATATCGAAGAGTTGGCGCTGGGCTAGCCGAAAATCAAAGTTTATCCGAAGCTTGGTCTAAAATTCCTGAAAAATTGGCTTTTTATGATTACATCGGTAATAATCCGGCAAAAGGTGGATTGTTCAGAGCAGGAGCAATGGACAACGGGGATGGAATAGCTGTTGGGTGGTTAGGTCATCCTATCTTTAGAGATAAAGAAGGGCGTGAACTTTTTGTACGTCGTATGCCTACTTTTTTTGAAACATTTCCAGTTGTTTTGGTAGACGGAGACGGAATTGTTAGAGCCGATGTTCCTTTTAGAAGGGCAGAATCGAAGTATAGTGTCGAACAAGTAGGTGTAACTGTTGAGTTTTATGGTGGCGAACTTAATGGAGTTACTTATAGTGACCCTGCTACTGTGAAAAAATATGCTAGACGTGCTCAATTGGGTGAAATTTTTGAATTAGATCGTTCTACTTTGAAATCGGATGGTGTTTTTCGTAGTAGTCCAAGGGGTTGGTTTACTTTTGGACATGCTTCGTTTGCTCTTCTCTTCTTCTTTGGACACATTTGGCATGGTGCTCGTACCTTGTTCAGAGATGTTTTTGCCGGCATTGATCCAGATTTAGACGCTCAAGTGGAATTTGGAGCATTCCAAAAATTGGGAGATCCAACTACAAGAAGACAAGTAGTCTGAATTTTATTTTTGTAATTTGACATTTGACATGGGGTACTGGAAACATCTTGATTTGAATAGTCGTCTTTTCCTTGAATCTTGCTCTTTTTTTATCCGGGGGAGGATCCCTAATAAACAGATATGGAAGTTATAATTGTAAACCGCGATCGAATCTATGGAAGCATTGGTTTATACATTCCTCTTAGTCTCGACTCTAGGAATAATTTTTTTCGCTATCTTTTTTCGAGAACCGCCTAAAGTTCCAACTAAAAAGATGAAATGATTTTTTATTATCTTAGTTGAAGTAAAGAGCCTCCCAATATTGGGAGGCTCTTTACTTCAACTAGTCCCCATGTTCCTCGAATGGATCTCTTAATTGTTGAGAGGGTTGCCCAAAAGCAGTATATAAGGCGTACCCGGTAAAACTTACAAGTAAACCAGATATAGAGATAGCGACCAGGGTTGCTGTTTCCATTATTATAGAATTTCAAGACCATAATGGGTCTATGATAAGATGATTTATTTACAACGGAATGGTATACAAAGTCAACAGATCTCAATTAATACAAAATAGGATTTATGGCTACACAAAATGTTGAGAGTAGTTCTAGATCTGGTCCAAGACGAACTATTGTAGGGGATTTATTGAAACCATTGAATTCGGAATATGGTAAAGTAGCTCCTGGATGGGGAACTACTCCTTTGATGGGTATCGCAATGGCTCTATTTGCGGTATTCCTATCTATTATTTTAGAGATTTATAATTCTTCCGTTTTACTAGATGGAATTTCAATGAATTAGATGTACAAGGACCGCTAAGTCCTAACTTTTCAATACAAAGTGAAGCGTTTTGGTCTGAGATTTTTTTTAGTCCATTCTATTCTATTTTGGTAGTTCGATCGTGGAATTTCTCTTTCTTTCTGTATTTTTGGAATATGAGTGTGCGACTTGTTATAATGGATCCTATTGATAGTACAGAGAATGGACCTGTCATCTTGATATAGATTGTTTTTTACCTCGTCAGATATTTATTCTAGTATCTGAAGCACGGAATATATGAAATCGATTACGAAGTTTTAGAACTATGATTCATACTTAATGTTCAGATCTTGCGACCCGACTCAAAAAAAAATTTCAATTCAAAGAGTTAGTTTCAACTCAAAGAGCTAGAAGGTATAAATTCAAAGATTTTTCTTCTTTCAAACGCTTTATCTATGCTTTTTTGATCAAAGGGCAAACCCTTCTGTGGATTTTTAGTTACTACATTTCTTCAACGCATTGAATAAGTGATGATACAACGATTCTTACTCAGGGAATCTTAGGTTTATAGTTTGAAGGGTTTATTGAATCATCGTGGGTCTAGCATGAATCTGAGGTTTCTTTCTATCGAGTTTAGGATCTTAACAAGAAAATTCCTATCAATAATAAAGACAACAACAGTAAGGCTGCATTACATACAAATCAAAATACCAAAAAAATAGAGAATATAGAAAATTCAAGAGGCCTGTAAAGAGCAACACTAAGAGATCAAAGAGCCGACTTGAAATTTTGGCATTATAACCACAAGAAAGAGTTGCCGGATTAGTGTTTTTTCGTATCGTAATCTTCAGCGAAGATTGTTGAATCATAGAATTAAGAAGTTTTTATTACACATATCCGTTTCAACTAATATTTTGGTGTTTCTGTTTGAGCTGTACGAGATGAAATTCTCATATACGGTTCTCAGAGGGGGAGTCTTCCCGGTTTACCTATCTCAATAAAGTCTATGATTGGTTCGAAGAACGCCTCGAGATTCAGGCGATTGCAGATGATATAACTAGTAAATACGTTCCCCCTCATGTCAACATATTTTATTGTTTAGGAGGAATTACGCTTACTTGTTTTTTAGTACAAGTAGCTACGGGGTTTGCTATGACTTTTTACTATCGTCCGACCGTTACTGAGGCTTTTGCTTCTGTTCAATACATAATGACTGAAGCTAACTTTGGTTGGTTAATTCGATCAGTTCATCGATGGTCGGCAAGTATGATGGTCCTAACGATGATCCTGCACGTATTTCGTGTGTATCTCACCGGTGGCTTTAAAAAACCTCGTGAATTGACTTGGATTACAGGTGTGGTTCTTGCTGTATTGACCGCATCTTTTGGCGTAACTGGGTATTCTTTACCTTGGGACCAAATAGGTTATTGGGCAGTCAAAATTGTAACAGGTGTTCCGGAAGCTATTCCTGTAATCGGATCGCCTTTGGTGGAGTTATTACGTGGAAGTGCTAGTGTAGGACAATCTACTTTGACTCGTTTTTATAGTTTACATACGTTTGTATTACCTCTTCTTACTTCCGTATTTATGTTAATGCACTTTTCAATGATACGTAAGCAAGGCATTTCTGGTCCTTTATAGAGAATATAGATCATAGATAGTTGTAATCAATCATTACATTAATCGTTTGGGGGAGGAAGATATAGTATTTCATTGCTATAAATATGGATTATTAAAAAAAAAAAAAATAAGCCATGTATTTGGATATTTTCCTTCAACTCCAAAAAAAAATTGAATTTCTTTTTTTTTTTTTTATTTTATTTGACATGAATAGTTGAAGCGAATTCTCCTAAGATAAAAATGGATTATGGGAGTGTGTGACTTGGACTATTGATTTAGCCGTGCAGATATATGCCCTTATCCGCCACATTGGAATTCACAATCAAATGTGTCTTTGTTCCAACAACTGCGAAAGCCCCATACAATACAGAGGGTAGGCTGGTTCGCTCGAAGAGAATCTTTTCTATGATCAAACCCCAATCATGTTGTGCATGAAGAGGCTCCGTAAAATCCAGTCGAATAAGTGATGTGGTAGAATCCATATTCTATTTTAGCTATTTTACCTAATATTTAGTTTTACAGATTTCATTTACTTATTTTAATAGTATGGAAATGCAGCCATTTCCTTTGCATCGACTCGATTTACGATACTATCGGAGTGAAAGAAGGGATCTACAGAATGCCAGAGGCTAAACTATATTAGTAACAAGTAAATCCTTTGTATGTAAAAAGTCTCGATATTTTTTGGAGATGGAGATAAGTCAATCGAAAGGTCTGAGACGGCCCAAAAAGCGGATCACCTTTGTAGGCATACTTGGGTATTGAGCATTTACCTGTAAGAACCGAATTCCTTGCAATGGATGATTGCAACTCTGGAAAAAGGAATCTAGTCAACTTTTTATTACATAAAATTATTACATAAAATCATTCATCTATGTGTAGATATGGATAACATATAGATTTTATAACATCTAGACATATATATTTTTATAGGGATGCTTTTGGCTCGTTTGATTATTGCTCGAGCTGGATGATGAAAAATTATCATGTCCGGTTCTTTCGGAGGATGGATCTATGAATTCACCTATCCCAATAACAAAAAAACCTGACTTGAATGATCCTGTATTACGAGCTAAATTGGCTAAAGGAATGGGTCATAATTATTACGGAGAACCCGCATGGCCCAACGATCTTCTATATATTTTTCCAGTAGTAATCTTAGGTACTATTGCATGTAATGTAGGATTAGCGGTTCTAGAACCATCAATGATTGGTGAACCTGCAGATCCATTTGCAACTCCTTTGGAAATATTACCTGAATGGTATTTCTTTCCCGTATTTCAAATACTTCGTACAGTACCAAATAAGTTATTGGGTGTTCTTTTAATGATTTCAGTACCTGCGGGATTATTAACAGTACCCTTTTTGGAGAATGTTAATAAATTCCAAAATCCATTTCGTCGCCCAGTCGCGACAACCGTCTTTTTGATTGGTACTGTAATGGCCCTTTGGCTAGGTATTGGAGCAACATTACCTATTGATAAATCTTTAACTTTAGGTCTTTTTTAAATTGATTCAATTATAAAATATCACGACATGCGTATCTAGGGAATAGTCACTTCAAAGTGAATTTTCCCTAGATAAACAAGCTATTCAATGTTAAAAAAAAAGGCGCAAATAAATCCATTGGATTTAAAATGGATTCTTTGGTAAATCAATTGCGAAATGCTTTTCTCTTTCTAAAATGTCTAATATATGTTTTACGTCGTTTATGCGAAAATATTCAATTTTCATAAGATCTTCGTGGCTCTTATTCAAAAGGTCCAATAATGTATGTATATTGGACCTTTTCAGGGAATTATAGATCTTCGGAGTCAATTCTAATTGGTCAATAAAAATATATTTCAATGCGAGTTCTTCTTTATTTTTTCTTAGTTTAAGTTTAGCCAATCTATCATGAAAAGTAAAAAGAGGTAAAGTAACCTTGTGCTGATTTTTTTCTAAATGCGCGTTTTCTTCTTCTGCATGTAGAAAAAGAATAAATAAATCAATCAAAGTTCGAGAGGCTTCATGAAGTGCTTCTTTAGGAGTTAAACTTCCATTTGTCCATATTTCCAGAAAAAGTATCTCTTGCTTTTCATTCCCGTTTCCATAAGAATGAACACTATGATTTGCATTTTTAACAGGCATGAATACAGCATCTAGAGGGTAACTTTCATCTTGAAAATTATTTGGCGGTTTTAGACGATAACCGCGACTCCTCTCGATTTGTAATTCAATACGCAAATCAATAGGTTCGGTTAGCTTAGCTATATGCTGTTTATTATCAATGATTTCCACAGCAGGTGGTAGGATGATGTCTTGAGCAGTTACATACCCAGGGCCTTTGACACAAATAGATGCGTTACGAGTTCCATACAAATTACTTCTCAATACAATTTCTTTTAAATTCATTAAAATTTCATGTACTGATTCTTGAATACCTGCTATAGTAGAAAATTCGTGTGCTATTTTTTGAGATTTTAATTTTGCACATGTGATACATGTTCCTTCTATTTCTCCAAGCAAAGCTCTTCGCATCGCAATGCCTATTGTGTCGGCTTGACCTTTCATAAGTGGAGACAGAATAAAACGTCCATAATAAAGACGCTTACTGGTGGCTCTTGATTCAACACACTTCCACTGTAGTGTCCGAGTAGATATTGTTACTTTCTCTCGAACCATAATAATCTTATTATTTTTTTTTTATCAAATGATTGAATTATTTATTTCTCTTGAAATCTCTTCAATGTTTATTTTTACACGCGTCTTTTTTTCGGGGCTCTGCAGCCATTATGTGGCATAGGAGTTACATCCCGGACGAAACTTAATAGTATACCACTTCTGCGAATAGCTCTTAATGCTGCATCTCTTCCGAGACCAGGACCTTTTATCATAACTTCTGCTCGTTGCATACCTTGATCCACTACTGTTCGAATAGCAATTCCTGCTGCAGTTTGAGCAGCAAATGGGGTCCCCCTTCTTGTGCCTCTGAACCCACAAGTACCAGCGGAGGACCAAGAGATTACTCGACCCCGGACATCCGTAACGGTCACAATAGTATTGTTGAAACTTGCTTGAACATGGATAACTCCTTTTGGTATTTTACGCGCATTCCTACGTGAAGCACTGCGTCCATTCCTGCGTAAACCAATTCTCGGTAAAGGTTTTGGCATATTTTATCATCTTATAAATAGAAGTCATAGGTTTATGGATATATCCATTTTGTGTCAAAATAGATCTTTTTATTTTTATTTGTACATTGGATCCTTTAGGGAGTTCCCGGTTACAAAGATTATCCTTGTCTTTGTTTATGTCTGGGATTGGAGCAAATTACTATAATTCGTCCCCGTCTCCGTATCAGTCGACATTTTTCACAAATTTTACGAACAGAAGCCCTTATTTTCATATTTGTCATTCCTTAATTTTATTAATTTTAAATATACATACTTTTTTTTTTGAAGAAAATAAGTTTCTTTCAATTTTGAAATCTTGAATTGTATCCCTATGAAAATGAAAGGAATTTTGAAGTTCAAAAAAACTATCTAATCATTTGAATCTTTCTCGCGGAGTCTGTAAATTAGATACCGTCTGGTTGAAACAGAATTACTTACTTCCATTTTGACCCTATCCCCCAGTAATATATGTATAAAACCACGTCGGGTCTTTCTCGCAACATAACCTAAAATTGGGTCTTTATTATCTAAATGAATCTGGGAACATACCATTAGAAAGTGATTCATTAATTTAACCTTCCCGAATCCTCTTTTGTTCTTTCATTCCATCTAAACGCCTCTTGAAGTATCAACTAATGTAGGAGGAATGTTATTATAAACCTGTTCCTTCCCCCCCCCTTTTTTTTTCACAAATAGAAAGCCCAGATACAATTTTGAAAAGATTACCATATATAACACAAGATTTCTCCACCGATTCTTTCTAGTCGAGCTTCTCGGTCTGTCATTATACCCCGAGAAGTAGAAAGAATTACAACCCCCATCCCACCCAAAATTTTAGGAATTTGCTGATAGTTAGAATAGATTCGTAAACCGGGTCGACTGATCCGTTTTAAATTTAGACTTGTTTTATATGGTCCTTTTCTATTCCTTCTATGCCGTAGAGTTAAAACCAAAAAATTTTTGTTGCCTTCCCGGTGTTTCCTCGCGTTTTCAATAAAACCCTCTCGTAAAAGTATTTTAATAATGTGTTCCGTGGTGTTAGTAGATCTTATTCGAACGCTTCCTTTTCTATCCATGTCAGCATTTCGTATAGAGGTTATTATGTCAGCAATAGTGTCCCTGCCCATGATAAACTAAAATTATTGTTGCTCCCTAATTTGGATATAATTAACATATTCATTTTTTTTTTTTTTTTCTTTTTTTTATGTTTTATGAAAGAATTTTATTTTTATTAAAGGTATATGCGTGAAATACAATCTATTAATTAATTTGAATTAAATCCAGTTCATTCAACTATTATAACTATATCACGGTCTAATCTTAAATGTTATCTTTCGTCTTATATTTTATATTATATGTTTTATCTTATAATACTTCAGGGGCTAATGAAACTATTTTAGTAAAATTTAACTGTCTCAATTCTCGGGCAATCGCACCAAAAATGCGAGTTCCTTTTGGATTTCCTTCTTGATCAATGACAACTGCAGCATTGTCATCATATCGTATTATCATACCGTTGTCTCGTTTGAGTTCTTTACAGGTACGTACAATTACAGCTCTAATTACTTCTGATTTTTCTAGAGGTGAATTTGGTACTGCTTCTTTGATCACAGCAACAATAACGTCACCGATATGAGCATATCGGCGATTACTAGTCCCTAGGATTCGAATGCACATCAATTCTCGGGCTCCGCTGTTATCTGCTACATTCAAATGGGTCTGAGATTGGATCATATCATTTTGTTATTTCAATGCAAAGGAAAAAAAAAAAGAAATATTATTTGTTAAAAAAAAAAAAAGAAACTTGCAATTTTTTTCATCTCCAAGACCTTTGTATTTTAGTTTCATTCTATATTCCTATCCCGAAATAATGAATTGAGTTCGTATAGGCATTTTTGACGCTGCTATTGAAATAGCCTTTCTGGCTATATTTTCTGCTACTCCGCTCATTTCATAAAGTATTCTTCCTGGTTTAACAACAGCTACCCAATATTCGGGAGATCCTTTCCCCGAACCCATACGTGTTTCCGTGGGTCTTACGGTAATAGGTTTGTCGGGAAAAATACGTACCCATATTTTTCCACCGCGGCGCGCATTTCGTGTCATTGCCCGACGCCCTGCTTCTATTTGTCGAGATGTAATCCAAGCGGGTTCAAGTGCTTGAAGAGCATATCTACCGAAAGAAATACGATTACCTCGATAAGATATTCCTTTCATCCTTCCTCTATGTTGTTTACGGAATCTGGTTCTTTTGGGGTTATAGTTGATGGTTGTTTCTCAATTCCATCTCTACTGCAAAACTGGACATGAGAGTTTCTTCTCATCCAGCTCCTCGCGAATGAAATGATTAAAAAAATATACATTTTAAAAATATACATAGAGTTGATGAATAGTATACTGAATGGTGGGATCCTTTCAGATTTCATCTAAATTATTTATTGTTAATTTATTTATTTTTATTGGAAATTTGTATATTTTATTTTTAGTTTTATTTAGTTTTTTAACTAAAACTAAATAACTGAAGTATAAACTTTTTGTTTTTTTTTTGTATTCTTATTTAATATATTTAGTCTATTTATTTAATATTATTTATAATATTATTGAGTATATTTATTTAGTATATTTATTATGATATCAAAATGATATCAGAGATATCAAAATGATATCAGATCGTTTAACAATAACATAAAAAGCTTCGCGGGCGAATATTTACTCTTTCACTGTTTCCTTCATTTATCATTTATAAGGTTAACCCATTAATTCTCAGAATAAATGGATTGTTCCCTGGTGCATTTCGCCATCCCCTCTAATGAATCATTAAGATTCATTTTCAATTTTCAATAGGATCTTATGTATTCACAGGTTCCGTCGTTCCCATCACTTCTCGATTACTGGTTAGGTCTTAATTGTACAATGGAGCCCTAATGAAAATTCTTCTTGAGTCAATTTTCTCAGTCTTTCTTGACTTGAGGCTCTTGATTTTTTTTCTATGAATATGAACAGATTCATTTAATTATAGATCAATCGGTAATGATGCTTTATTACATTGGCTTTTATATGAGATGACTCATAGACCTTACATATTGGTATTGGAATTTTATATCATTGATATTTTTTTTCTCTCTTTCTCTCACCTTTCCATTTATCTGCAAAATTGGAATTTTGCTTTCCAATTAATAATCTAATTCATTTAGCTTTTCTTTATGTAAAAATAAGATTTAAGTTGCTACAATGATATGATTAATATATCATATCTTGCTTCTTTTATTTGGATCTAGATAATGCGAAGCGATGAGTTGGTTATTCGTTCTATACTTATTAGTTCATAATTAGGGGTCAGTCCATTTTTTTTAATCCTTACCTTAAAAAAAACCAAGGAGTCGCACACAACGAGTCGCACACTAAGCATAGCAATTATATCAAATTCTTAATCTAATTTTTTATTTTATTCAACCCTATAGAATTAGAATATAGAATTAGAATTGCTTTTTTTTGTTCAATCAAAACAAAAAAAAAAAAAAAAATGAAAGAGGTTGTCATTTTTTGTTCTTTCAATGGATCGAACATAAAGACAAGTTAAGTAAGGGTCTACTATTCCTCGTTTCCAAATGTCCAAATTTTTATGCCTAATACCCCATAAATCGTTATAACTTTATAGGAACAATACTCAATTTTAGCTCGAATGGTTTGGAGAGGAACCCTACCTTCTCTAATCCATTCAACGCGTGCAATTTCTTTTCCGTCAAGACGCCCCGCAATTTGTATTTGAATTCCTTTTGTATCAGCCTGTTCGGTCAATTCAATAGCTTTTTTCATTGCTTTGCGAAACGGGACTCTATTCTTTAATTGTCCGGCTATAAATTCTGCAAGAATATTAGGGTGCCTGTAGGGCTTTTTAATTCTTTTAATAGAAATGTTGAGCTTTTGGTTCACACAATTAAGTTCTTTTTGTATATTTAGCTCTAATTCTTCGAGTTTTTTACTTTTAGGTTTAGCTTCTATTAATAATTTTGGGAATCCCATATATATTATAACCTGAATCACATCAATTCGTTTTTGAATCTTTATACGTGAAATTCCCTCAACACCAGAAGAAAGTTTCATATCTTTTTGTACATAATTCTTGATACAGTTTCTTATTTTTTGATCTTCTTGTAGACCCTCAGAATAATTTTTTGGTTGTGCAAACCAAAGAGAATGATGACCTTGGGTCGTACCAAGTCTGAAACCAAGTGGATTTATTTTTTGTCCCATAATCCCTCACTACTATACATATCATGACATGTTATATCCGTGGCTTTTTTTTTTTTTTTTTTTTCCCCCCCCCCCCGATTTTTTTAAATATATGGTATATTATATTTTTCATATTCGTCATATAATTCTTCATCCAAGGATATATCTTTCAGTACAATAGTTATATGACAAGTCGGTCTTTTTATTAGAGAATTGCGCCCTCGAGCCCGAGGTTTTAGTTTTTTCACAGTAGTACCCTCGTTGACTTCAGCTTTACTAATGACTAAACTCGCTTTGTTGAAGCCCATATTGTGACTAGCGTTTGCCGCTGCAGAATAAACTAATTTAAAAATGGGATAACATGCTTGATAAGGCATGAGCTCGAGTATCATAAGTGTTTCCTCATAGGAACGTCCACGAATTTGATCAATTACTCTTCGCGCTTTGTGGGCAGACATACATATATGTTGACTTCGAGCATATACTTCTGTATATAAATATGAGTTGTTCCGTCTCTTCTTTATCATAAGGTTCACCTCAAATCAAAATCCACAAACTATTAAGTATTTTATTATTAATGTAAATAGATAAGCATCTATAATGTATATTTGCTTTTATTAACGACGAGATTTATTATCATTTTTTGCATGTCCCCGGAAATTTAGAGTAGGTGAAAATTCTCCCAATTTATGACCCACCATACGATCTATTATATAAATAGGTAAATGTTGCTTTCCATTATGGATAGCAATAGTATGGCCAATCATTGTGGGTATAATGGTAGATGCCCGGGACCACGTTACTATTATTTCTTTTTCTGCCTTTGTGTTAAGTTTCTTTATTTTTCTTAATAAATGATTTGCTACAAAAGGGTTTTTTTTTAGTGAACGTGTCACAGTCAATTTCTCCTATTTTTTTTTTTGAAAAGACGAAGAAACAAATTCTATTTTCTCTCCTATTTACTACGGCGACGAAGAATCAAATTCTCACTATATTTATTCCTTTTTCTACTTCTTCTTCCAAGTGCAGGATAACCCCAAGGGGTTGCGGGTTTTTTTCTACCAATTGGGGCCCTCCCTTCACCACCCCCATGGGGATGGTCTACAGGGTTCATAACGACTCCTCTTACTATAGGACGCTTACCTAGCCAACATTTAGATCCGGCTCTACCCAAACTTTTCTGGTTCACCCCAGCATTCCCTACTTGTCCGACTGTTGCTGAGCAGTTTTTGGATATTAAACGAACCTCCCCAGAAGGTAATTTTAATGTGGCCGATTTCCCCTCTTTTGCAATCAGTTTCGCTACAGCACCTGCAGCTCTAGCTAATTGTCCACCCTTTCCAAGTGTGATTTCTATGTTATGTATGGCCGTGCCTAAGGGCATATCGGTTGAAGTAGATTCTTCTTTTTGATCAATCAAAACCTCTTCCCAAACCGTACAAGCTTCTTCCAAAGCATACGGCTTTCTGGGTGTAGATGATGATATCTATACAGATGGATCTTATCTATCATACAATGAAGTAAAGTACTACATGAGTGGATATATAGGAATCCAAATCTGCCGAATCACTCATGTTATGCTCTTCTACATCCTAGGTCTTCCCGTTCCTTCATCTGGCTTATGTTCTTCATGTAGCATTCAGATCGAATGACTCTATGAAATTACGTCGATACTTCCACATATTAGGGGTAACGTAGGAGACATCTCTATTTTTCCCCCGGGGAATCTTTAGAATTCCCACTGCTTAGCTTTCAATTTGTCTCTGACCATCAAATGAAATGTGAATAACCCGTCTTCCTCTCTTTGAAACAAGGGGCGCTTCTGGTTCTGTCGGTGCTTGAAACAATTTTGTCTTCTCCATATTACTATATCTCTAGAGTCAATAATTTTATATGAGGAACTACTGAACTCAATCACTTGCTGCCGTTACTCTTCAGTTTTCTGTTGAGGTCTATCCTGTAGAGGTACTCAAATTGGATCAGTGATCGATTTCTAGGTTTCGTCGTAAACCTAATTGGTTACTTCCAATTACGTAAATCAATAGTTCAAACCGCACTCAAAGGTAGGGCATTTCCCATTTTTATAGGAACTTCTGTACCAGAAATAATGGTATCTCCAATTATAGCCCCTCTGGGATGTAAAATATATCTCTTCTCACCATCCCCATAGTGTATGAGACAAATGTATGCATTTCGATTAGGGTCGTATTCTATGGTTACGATTCTACCATATATGTCTTTTTCATTCCGTCGAAAATCGATTTTACGGTATAGACGCTTATGACCTCCCCCTCTATGCCTTGCGGTAATGATTCCTCTAGCATTACGTCCTTTACCACAACGATGCTGTCCATAGATCAAATTATTTCGTGTATTGGATTTTACTTGACTGTCTACGGCTCCATTGCGTGTGCTCGGGGTAGAAGTTTTGTATAAATATATCGCCATGCTATTAAGTATTTTGATTTAAGTTCTTTTCTTTCTAAGAGGTGGAATAGAATAACCCGGTTGAAGCGTAATGATCATACGTTTGTAATGCATTGTATGTCCCATAATAGGTCTCATTCTTCTACCCTTTCCCGGGAGTCGATGGCTATTCATAGCTATTACCTTGACACCAAAGAAGAGTTCGACCCAATGCTTTATTTCTGTCCTAGTTGATCCTAATTCGACATTAAAAGTATATTGATTTTTCCCCAATAACTGAATACTTTTGTCTGTAAATACTGCATATTTGATTCCATCCATAAATCTATTTTCTTCCCTATGAGTTCTAGTCTCAGTAAGAATGCTAGTTCTTACTGTTCATATGTTATGATATGAATATACCACACCAATTCGTTATGTATGGATGATGAGATTCCATTGATACAGAGCCAATTCCAATAGACTTATTGGAGGGTCCCATTGGCGTGCATCCAGTAGGAATTGAACCTACGAATTCGCCAATTATGAGTTGGGCGCTTTAACCATTCAGCCATGGATGCTTAGCGGGGATCCTCGTACATGGTGAATAACCAAATTCCAATTGAAATGAAATCTTTAGGATAAATCAATGCAATTTAGGAGGAATCAATGAAAGGACATCAATTCAAATCCTGGATTTTCGAATTGAGAGAGATATTGAGAGAGATCAAGAATTCTCACTATTTCTTAGATTCATGGACCCAATTCAATTCAGTGGGATCTTTCATTCACATTTTTTTCCATCAAGAGCGTTTTATAAAACTCTTGGACTCCCGAATTTGGAGTATCCTACTTTCACGCAATTCACAGGGTTCAACAAGCAATCGATATTTCACGATCAAGGGTGTAGTACTATTTGTAGTAGTGGTCCTTATATATCGTATTAACAATCGAAAGATGGTCGAAAGAAAAAATCTCTATTTGACAGGGCTTCTTCCTATACCTATGAATTCCATTGGACCCAGAAATGATACATTGGAAGAATCCTTTGGGTCTTCCAATATCAATAGGTTGATTGTTTCACTCCTGTATCTTCCAAAAGGAAAAAAGATCTCTGAGAGCTGTTTCCTGGATCCGAAAGAGAGTACTTGGGTTCTTCCAATAACTAAAAAGTGTATCATGTCTGAATCTAACTGGGGTTCGCGGTGGTGGAGGAACTGGATCGGAAAAAAGAAGGATTCTAGTTGGAAGATATCTAATGAAACCGTCGCTGGAATTGAGATCTCATTCAAAGAGAAAGATATCAAATATCTGGAGTTTCTTTTTGTATATTATATGAATGATCCGATCCGCAAGGACCACGATTGGGAATTGTTTGATCATCTTTCTCCGAGGAAGGGGCGAAACATAATCAACTTGAATTCGGGACAGCTATTCGAAATCTTAGTGAAAGACTGGATTTGTTATCTCATGTTTGCTTTTCGTGAAAAAATACCAATTGAAGTGGAGGGGTTCTTCAAACAACAAGGAGCTGGGTCAACTATTCAATCAAATGATATTGAGCATGTTTCCCATCTCTTCTCTAGAAAGAAGTGGGCTATTTCTTTGCAAAATTGTGCTCAATTTCATATGTGGCAATTCCGCCAAGATCTCTTCGTTAGTTGGGGGAATAATCCGCACGAATCGGATTTTTTGAGGAACATATCGAGAGAGAATTGGATTTGGTTAGACAATGTGTGGTTGGTAAACAAGGATCGGTTTTTTAGCAAGGCACGGAATATATCGTCAAATATTCAATATGATTCCACAAGATCTAGTTTCGTTCAAGGAAGGGATTCTAGCCAATTGAAGGGATCTTCTGATCAATCCAGAGATCATTTCGATTCCATTAGGAATGAGGATTCGGAATATCACACATTGATCAATCAAAGAGAGATTCAACAACTAAAACTAAAAGAAAGATTGATTCTTTGGGATCCTTCCTTTCGTCAAACGGAACGAACAGAGATAGAATCAGACCGATTCCCTAAATGCCTTTCTGGATATTCCTCAATGTCCCGGCTATTCGCGGAAGGTGAGAAGGAGATGAATAATCATCTGCTTCCGGAAGAAATTGAAGAATTTCTTGGGAATCCTACAAGATCCATTCGTTCTTTTTTCTCTGACAGATGGTCCGAACCTCATCTGGGTTCGAATCCTACTGAGAAGTCCACTAGAGATCAGAAATTGTTGAAGAAAGAACAAGATATTTCTTTTGTCCCTTCCAGGCGATCGGAAAATAAAGAAATAGTGAATATATTCAAGATAATTACGTATTTACAAAATACCGTCTCAATTCATCCTATTTCATCAGATCCGGGATGTGATATGGTTCTGAAGGATGAACTGGATATGGACAGTTCCAATAAGATTTCTTTCTTGAACAAAAATCCATTTTTTGATTTATTTCATCTATTCCATGATCGGAACGGGGGGGGATACACGTTACACCACGATTTTGAATCAGAAAAGAGATTTCAAGAAATAGCGGATCTATTCACTCTATCAATAACCGAGCCGGATCGGGTGTATGATAAGGGATTTGCCTTTTTTATTGATTCCTACGGATTGGATCAAAAACAATTCTTGAATGAGGTATTCAACTCCAGGGATGAATCGAAAAAGAAATCTTTATTGGTTCTACCTCCTATTTTTTATGAAGAGAATGAATCTTTTTATCGAAGGATCAGAAAAAGATGGGTCCGGATCTCCTGCGGGAATGATTTGGAAGATCCAAAACAAAAAATAGTGGCTAGGAACAACATAATGGAGGCAGTCAATCAATATGGATTGATCCGAAATCTGATTCAAATCCAATATAGCACCTATGGAAGAAATGTATTGAATCAATTCTTTTTAATGAATAGATCCGATCGCAACTTCGAATATGGAATTCAAAGGGATCAAATAGGAAATGATACTCTGAATCATAGAACTATAATGAAATATACGATTAACCAACATTTATCGAATTTGAAACAGAGTCAGAAGAAATGGTTCGATCCTCTTATTTTTCTTTCTCGAACCGAGAGATCCATGAATTGGGATCCTAATGCATATAGATACAAATGGTCTAATGGGAGCAAGAATTTCCAGGAGCATTTGGAACATTTCATTTCTGAGCAGAAGTTTCAAGTAGTGTTCGATCGATTACGTATTAATCAATATTCGATTGATTGGTCTGAGGTTATCGACAAAAAAGATTTGTCTAAGTCACTTCGTTTCTTTTTGTCCAAGTTACTTCTTTTTTTGTCCAAGTTTCTTCTCTTTTTGTCTAACTCACTTCCTTTTTTCTTTGTGAGTTTCGGGAATATCCCCATTCAAAGGTCCGAGATCCATATCTATGAATTGAAAGGTCCGAATGATCAACTCTGTAATCAGCTGTTAGAACCAATAGGTCTTCAAATCGTTCATTTGAAAAAATGGAAACCCTTCTTATTGGATGATCATGATACTTCCCAAAAATCGAAATTTTTGATCAATGGAGGAACAATATCACCATTTTTGTTCAATAAGATACCAAAGTGGATGATTGACTCATTCCATACTAGAAATAATCGCAGGAAATCTTTTGATAACACGGATTCCTATTTCTCAATGATATCCCACGATCAAGACAATTGGCTGAATCCCGTAAAACCATTTCATAGAAGTTCATTGATATCTTCTTTTTATAAAGCAAATCGACTTCGATTCTTGAATAATCTACATCACTTCTGCTTCTATTGTAACAAAAGATTCCCTTTTTATGTGGAAAAGGCCCGTATCAAGAATTATGATTTTACGTATGGACAATTCCTCAATATCTTGTTCATTCGCAACAAAATATTCTCTTTGTCTTTGTGCGGCGGTAAAAAAAAACATGCTTTTTTGGAGAGAGATACTATTTCACCAATCGAGTCACAGGTATCTAACATATTCATACCTAATGATTTTCCACGAAGTGGTGACGAAAGGTATAACTTGTACAAATCTTTCCATTTTCCAATTCGATCCGATCCATTCGTTCGTAGAGCTATTTATTCGATCGCAGACATTTCTGGAACACCTCTAACAGAGGGACAAATAGTCAATTTTGAAAGAACTTATTGTCAACCTCTTTCGGATATGAATCTATCTGATTCAGAAGGGAAGAACTTGCATCAGTATCTCAATTTCAATTCAAACATGGGTTTGATTCACACTCCATGTTCTGAGAAAGATTTACCATCCGAAAAGAGGAAAAAACGGAGTCTTTGTCTAAAGAAATGCGTTGAAAAAGGGCAGATGTATAGAACCTTTCAACGAGATAGTGCTTTTTCAACTCTCTCAAAATGGAATCTATTCCAAACATATATGCCATGGTTCCTTACTTCGACAGGGTACAAATATCTAAATTTGATATTTTTAGATACCTTTTCAGACCTATTACCGATACTAAGTAGCAGTCAAAAATTTGTATCCATTTTTCATGATATTATGCATGGATTAGATATATCATGGCGAATTCTTCAGAAAAAATTGTGTCTTCCACAATGGAATCTGATAAGCGAGATTTCGAGTAAGTGTTTACATAATCTTCTTCTGTCCGAAGAAATGATTCATCGAAATAATGAGTCACCATTGATATCGACACATCTGAGATCGCCAAACGTTCGGGAGTTCCTCTATTCAATCCTTTTCCTTCTTCTTGTTGCTGGATATCTCGTTCGTACACATCTTCTCTTTGTTTCCCGAGCCTCTAGTGAGTTACAGACAGAGTTCGAAAAGGTCAAATCTTTGATGATTCCATCATACATGATTGAGTTGCGAAAACTTCTGGATAGGTATCCTACATCTGAACTGAATTCTTTCTGGTTAAAGAATCTCTTTCTAGTTGCTCTGGAACAATTAGGAGATTTTCTAGAAGAAATACGGGGTTCTGCTTCTGGCGTCAACATGCTATGGGGTGGTGGTCCCGCTTATGGGGTCAAATCAATACGTTCTAAGAAGAAATTTTTGAATATCAATCTCATCGATCTCATAAGTATCATACCAAATCCCATCAATCGAATCACTTTTTCGAGAAATACGAGACATCTAAGTCATACAAGTAAAGAGATTTATTCATTGATAAGAAAAAGAAAAAACGTGAACGGTGATTGGATTGATGATAAAATAGAATCCTTGGTCGCGAACAGTGATTCAATTGATGATAAAGAAAGAGAATTCTTGGTTCAGTTCTCCACCTTAACGACAGAAAAAAGGATTGATCAAATTCTATTGAGTCTGACTCATAGTGATCATTTATCAAAGAATGACTCTGGTTATCAAATGATTGAAGAGCCGGGATCCATTTACTTACGATACTTAGTTGACATTCATAAAAAGTATCTAATGAATTATGAGTTCAATACACCCTGTTTAGCCGAAAGACGGATATTCCTTGCTCATTATCAGACAATCACTTATTCACAAACCTCGTGTGGGGCGAATAGTTTTCATTTCCCATCTCATGGAAAACCCTTTTCGCTCCGCTTAGCCCTATCCCCCTCTAGGGGTATTTTAGTGATAGGTTCTATAGGAACTGGACGATCCTATTTGGTCAAATACCTAGCGACAAACTCCTATGTTCCTTTCATTACAGTATTTCTTAACAAGTTCCTGGATAACAAGCCTAAGGGTTTTCTTATTGATGATAGTGACGATATTGATGTGAGTGACGATCTCGACCGTGACCTTGATACGGAGCTGGAGCTTCTAACTAGGATGAATGCGCTAACTATGGATATGATGCCGGAAATAGACCGATTTTATATCACCCTTCAATTCGAATTAGCAAAAGCAATGTCTCCTTGCATAATATGGATTCCAAACATTCATGATCTGGATGTGAATGAGTCGAATTACTTATCCCTTGGTCTATTAGTGAACTATCTCTCCAGGGATTGTGAAAGATGTTCCACTAGAGATATTCTTGTTATTGCTTCGACTCATATTCCCCAAAAAGTGGATCCCGCTCTAATAGCTCCGAATAAATTAAATACATGCATTAAGATACGAAGGCTTCTTATTCCACAACAACGAAAGCACTTTTTCACTCTTTCATATACTAGGGGATTTCACTTGGAAAAGAAAATGTTCCATACTAATGGATTCGGGTCCATAACCATGGGTTCCAATGTACGAGATCTTGTAGCACTTACCAATGAGGCCCTATCAATTAGTATTACACAGAAGAAATCAATTATAGACACTAATATAATTAGATCTGCTCTTCATAGACAAACTTGGGATTTGCGATCCCAGGTAAGATCGGTTCAGGATCATGGGATCCTTTTCTATCAGATAGGAAGGGCTGTTGCACAAAATGTATTTCTAAGTAATTGCCCCGTAGATCCTATATCTATCTATATGAAGAAGAAATCATGTAATGAAGGGGATTCTTATTTGTACAAATGGTACTTCGAACTTGGAACGAGCATGAAGAAATTGACGATACTTCTTTATCTTTTGAGTTGTTCTGCCGGATTGGTTGCTCAAGACCTTTGGTCTCTACCCGGACCCGATGAAAAAAATGGGATCACTTATTATGGACTTGTTGAAAATGATTCGGATCTAGTTCACGGCCTATTAGAAGTAGAAGGCGCTCTGGTGGGATCCTCACGGACAGAAAAAGATTGCAGTCGGTTTGATAATGATCGAGTGACATTGCTTCTTCGGCCCGAACCAAGGAGTCCCTTAGATATGATGCAAAATGGATCTTGTTCTATCCTTGATCAGAGATTTCTCTATGAAAAATACGAATCGGAGTTTGAAGAAGGGGAAGGAGAAGGAGTCCTCGATCCACAACAGATAGAGGAGGTTTTATTCAATCACATAGTTTGGGCTCCTAGAATATGGCGCCCCTGGGGCTTTCTATTTGATTGTATCGAAAGGTCCAATGAATTGGGATTTCCCTATTGGGCCAGGTCATTTCGGGACAAGCGGATCATTTATGATGAAGAGGATGAGCTTCAAGAGAACGATTCGGAGTTCTTGCAGAGTGGAACCATGCAGTACCAGACAGGAGATAGATCTTCCAAAGAACAAGGCTTTTTTCGAATAAGCCAATTCATTTGGGACCCTGCGGATCCACTCTTTTTCCTATTCAAAGATCCCCCCTTTGTCTCTGTGTTTTCACATCAAGAATTCTTTGCAGATGAAGAGATGTCAAAGGGGCTTCTTACTTCCCAAACCAATCCTCCTACATCTATATATAAACGCTGGTTTATCAAGAATACGCAAGAAAAGCACTTCGAATTGTTGATTCATCGCCAGAAATGGCTTAGAACCAATAGTTCATTATCTAATGGATTTTTCCGTTCTAATACTCTATCCGAGAGTTATCAGTATTTATCAAATCTGTTCCTATCTAACGGAACGCTATTGGATCAAATGACAAAGGCATTGTTGAGAAAAAGATGGCTTTTCCCGGATGAAATTGGATTCATGTAATAGGAGAAAGGTTTCCCATTCCTTAGCCTGAAAGATATGTGGCCATGAAATAGAGATTAAGTGGAACAGAATTGACTGGGTGGTAAAGTCGTGGAAACACCTCTTTCTTCCATATTTTGGACATGGAAGAATATGTTACTGCTGAAACATGGAAGAATTGAAATCTTAGATCAAAACACTATGTATGGATGGTATGAACTGCCTAAACAAGAATTCTTGAACAGCGAGCAACCAGAGCTATTACTCACTACATCAAAAAATTTCCATTAATGAAAGATGTAAATCCATTGGAAAATCAAAAATACGTATGTCGGATGAAATGGTGGTTGTTGCTATCTGCTCCAATAACGAATCATTGGTTTAACTGAATAACTAAATGAATAACTAAATAAAATAGATAGACCCTTCTCTTCGTCTCAGGTCGATGGATCTTCTCAATTGGAAGATCCCCTATATGGATAATACACATTCCAGTTGACCGGGCCTAATTCTAATTGTTTTGTTCCGAAGCAAAGATATCCACGGGGCGGTTCGTCCTATTCAGATATTCACGACCAAGAAGTACTGGATTCTCTTTCGGATAGTCCCTGAAAGGAGAAGGAAGGATGGAATGCCAACAGACGCCTATTATTGAATTCACCCGACCCGATAGTACCCATTTTTTTTTGGGACCATCCAGTGCCAAAGTCACTGAATGGGTAAGTCGCCAATCCCTAAAACGGACTATGTAATGTACTTTATCTGTTGGGTGACGGGCGGGCATTTTACCAGAGGTTTCTATTGTATCAATCTACCCTTGTGTAATTCCTGTTGAAGCATATACTCGGGGGTGGTTGCAGGGCGAACGATTTCAAAGCGGACTCCCCATTCATTAGATAGAGAAGATCACCAAGATTTCGTGATCCGCTGCCGAACTTATTCCAATTCAATGAGCATTCTCAATATTATGCCTTGAAGAGGACTCGAACCTCCACGCTCTTTAGCACGAGATTTTGAGTCTCGCGTGTCTACCATTTCACCACCAAGGCATCTTGAAAGTGAATCGTATTCCATGAATATGATATCTATCTAGTGTGATGTATGGAATATATGACAAAGGTGGAGTGTTGGAGTATTTCTATTGATCGTTCATGTCATATAGGCCCGAGTCGGACATCCAATTGCTTCGATTTGAATTATCCGGAACATGCCTTATATATATATTATAGCAAAAAATTATAGCAAAAAAATGGACAATCAAACCCATTTCTCGATTCAATAGACGCCCAAAGAGGTGAATAGAATAGGGTCCCAAATAAGGAGAGATATATATGTAAAAAGCAGGTCCGATTACGCCTATTCCTAATCCTAAATGGAATGTAACGACGGAGGGATCCATATGTAAACATAGTATCTATTTAGATACGATAGTATCTATTTAGATACGCTCGAATGACCCCTTCTCATAATGAGAATGTATATAAGCCTATTCCGGTCTGGTCCGGTATGGAATGAACTTATAATCATGGAATCGACTCGATTATCAGATTATAAGTTCATAACCCTAGCCCATTCCCATTTTGGGCGGAACAGATCTACTAATTCTTTGATTCCAGTTAGTAAGAGGGATCTTGAACTAAGAAATAGGTTCTAGAAGCTAAAAAAGGGTATCTTGAGCAATTTCAATAATCGGGTTCATTGATATTCCTGGTATAGTAGATGCTATTACACATACAATCATACTCAATTCGATGGAATTGTTTGATCTTAAAGGGGATCTTCTATAATTTCGCACGTGAGGGGTTATTTCTTGGTTTCGTCCAGTCATTAATAACTTGATTATTTTTAGATAATAGTAGATAGAAACAACGCTCGTAAGGAGTCCTATTGAAACCAAGAAATATAGGCCTGCCTGCCATCCACACCAGAATAAATGGAGTTTTCCGAAAAAACCTGCTAGTGGAGGAAGACCTCCTAGGGATAAGAGACATAGGGCTAAAGAGAGAGCCAAAAAAGGATCTTTCGTGTATAATCCTGCATAATCTCGAATGTTATCAGTTCCGGTACGTAGACCAAATAATACAATGCAAGCAAAAGTTCCTAGATTCATGGAGATATAGAAGAAGATATAAGTTATCATGCTTGCATATCCACCATTTGAGTCTCCAACAATGATTCCAATAATTACATATCCGATTTGACCTATGGACGAATATGCAAGCATACGTTTCATGCTTGTTTGAGTAATAGCAATGAGATTCCCCACTATCATGCTCAGAATAGCTAGGATTTCCAGAAGAAGATGCCATTCGTTTGATGAGAAATAAAAAGGAATATCGAAAATTCGAGTGGCTGAAGCTGAAGCAGCTACTTTCGAAGTAACAGAAAGAAAAGCAACGACTGGAGTGGGAGAGTCAGAGTCGAAAAGAGGATTCCTCACTTCTTTCTCTCATTCAAAACCGTGCATGAGACTTTCATCTCGCACGGCTCCTAAGTGATAAAAGAAAGAAGAACTCATCTTCTTTCTTTTTTGATTACCTTCCTCGCGTATGTATAAGACCGAATCCATTCGATTTCTAAAAAGGATTACTAATCCTTAACTTTTCGAGGAATCCTTCATCAGTGGTTGTGAATGACCAATTTTTCTCAATCTTTCTGACTTGCTCCTACGGAACCAAGAGGTCGAAAAGATTGAGAAATAGAACCATCTGATTTGATTCGTTCTCAATAGCCATGAGATGATCATCTTAGGGTGATCCTTTTGTCGACGGATGCTCCTATTACACTCGTAGTCTCTGAAGGATGAGAACCAACTATGTAGCATCTACATCGAGAATTTAAATATTGTATACGTCATTAGTCCGATCTTTTGTAGGAGCTACCCGTAATAACGAACTTGCAAAATGAATCTTGTTTATCATAAAGAGATTCGTTGTTCCTGACGCTGCTTCACCTTAATTGTTATTTGAACAAGTAAAAGTTATGTCTTGGTCCGAGTGCGGATAGCATTTCTCTTCTGCATGTCCATGGAGTTTTGAAAAATCCAAGCATCTCAGAGATAGATAGAGAAGTAGGAATTTTTCGAACGAACCGCACTCCTTCGTATACGTCAGGAGTCCATTGATGAGAAGGGGCTAGGGAAAGCTTGAACCCAATTCCTACAGTGATGAATATAAGCGCAATTGAAATTCCTGGGGAGTTATACATTTGTGTATTGATAAGACCATTCACTATTTCTTGAAGCTCGATCTCTCCCCCGGACGAACCATATAGCCAAGAGAAACCATGAACCAGAATAGAAGAGCTTGCCCCACCCATGAGTAAATATTTCATAGTAGCCTCATTAGACCGTACATCTTTCTTGGTATATCCAGATAATAGGTAGGAGCATAAACTGAAACATTCTGGAGCTACAAAGATAGTTATTAAATCGTTAGCACCGCATAAAAACATTCCTCCTAGAGTAGCTGTTAATACGAATAAGAGAAACTCTGTTATAGCCATTTCTGTACATTCAATGTACTCTACGGATAGAGGAATACATAGAGTTGAACATAGTAAAATAAGAAATTGAAATATTTCGTTGAAATTGTTCGTTTGGAAATTTCCCGAAAAGCTAATCATAGGTTCTTCTCTCCATCGGAACAATAGGGCCGTTATACTCATTACTAAACTTGTTGAAGAGATGAAATAAAACCAAGGTATATCTTTTTGATCAGAAGTTGAATCGATCATCAGAAGAAGAATTAGGCCAAAAATTAGGATACATTCTGGGAAAATCAAACTTCCATCGAAGAGAAGCAAATGAAAGGCTTTCATAAAAATTCTCGTAGAATCGAGAATGAAGTTTTCATTCTGTACATGCCAGATCATGAATTAGTAACTGCATCCAATCTCCAAAAAATCCCAATTGTTTCGAACTTTCTCTTTTTTTTTTTGGAATGGAATATTTACGGAATCCCCATAAATAGGATCAAACCTTATTCCATGGTATTTACCTTTTTTTTATTCTTATCTTAAGCAAGTCCCCGAGAGGGCTTAATTGATCCATGATTTATGTTTCATCTTTCGTTTCCTTTTCGTTTGTTTCGAGAAATATAGCGATCAATTCCGATTCTTTCTTTTTCTATTGATTCTTTTCCGATCGAGATGTATGGCTCCATGAGTCTATATAGATCCTGTTCATGGATTAACGAAAATGCGCAAAAGCTCTATTTGCCTCCGCCATTCTATGAGTCTCTTCCTTTTTGCGTATGGCATCGCCACTCCCTTTGGCAGCATCCACTAATTCGGAACTTAATTTGAAAGCCATATTTCGGCCCGGACGTTTTCGGGATGCCCCTAATAACCAACGAATGGCAAGTGCTTTTCCTTGTGTGGATCCTATTTCAATGGGAACTTGATGAGTCGATCCGCCTACACGTCTTGCTTTTACTGCTATATCGGGAGTTACTCCACGTATTGCTTGACGTAAAACAGATAGTGGATTTGTTTCTGTCTTTTGTTGAATCTTTTTCATGGCTCGATAGATAATTTGATAAGCCAATGATTTTTTTCCGTGTTTCAGAATACGGTTAACCAACATGTTAACTAATCGATTACGATAAATTGGATCGGATTTTGCAGTTTTTTCTTCTGCAGTACCTCGACGTGACATGAGCGTACAAGGGGTTCTCAAGAATCAGTTTTCCTTTTATAAGGGCTAATAAAATCATTTATTTTGGCTTTTTGACCCCATATTGTAGGGTGGATCTCGAAAGATATGAAAGACCTCCCTCCAAGCCGTACATACGACTTTCATCGAATACGGCTTTCCACAGAATTCTATATGTATCTATGAGATTGAGTATGGAATTCTATTTACTCACTTTAAATTGAGTATCCGTTTCCCTCCTTTTCCTGCTAGGATTGGAAATCCTGTATTTTACATATCCATACGATGGAGTCCTTGGGTTTCCGAAAAAGTGTAAAAAGAAGTGCTTTGAATCATTGCTATTTGACTCGGACCTGCTCTAAAAAAGTCGAGGCATTTCGAATTGTTTGTTGACACGGACAAAGTCAAGGAAAACCTCTGAAATTCTTCCAATATTGGACCTTGGACATATAAGAGTTCCGAATCTCTTTAGTAAAGAAGATCTTTTGTCTCATGGTAGCCTGCTCCAGTCCCCTTACGAAACTTTCGTTATTGGGTTAGCCATACACTTTACATGTTTCTAGCGATTCACATGGCATCATCAAATGATACAAGTCTTGGATAAGAATCTACAACGCACTAGAACGCCCTTGTTGACGATCCTTTACTCCGACAGCATCTAGGGTTCCTCGAACAATGTGATATCTCACACCGGGTAAATCCTTAACCCTTCCCCCTCTTACTAAGACTACAGAATGCTCTTGTAAATTATGGCCAATACCGGGTATATAAGCAGTGATTTCAAATCCCGAGGTTAATCGTACTCTGGCAACTTTACGTAAGGCAGAGTTTGGTTTTTTGGGGGTAATAGTGGAAAAGTTGACAGATAAGTCATCCTTACTGCCACTCTACAGAACCGTACATGAGATTTTCACCTCATACGGCTCCTCGTTCAATTCTTTCGAAGTCATTGGATCCCTTTCCTCGTTCGAGAAGCTCCTCCCTTCATCCACTCCGTCCCCAAGAGTAACTAGGACAAATTTAGTCACGTTTTCATGTTCCAATTGAACACTTTCTTTTTTTGATTATTCTCAAAGGAGAAGATTCTTCTTTTTACCAAACATATGTGGATCCAATCACGATCTTATAATAAGAACAAGAGATCTTTCTCGATCAATCCCTTTGCCCCTCATTCTTCGAGAATCAGAAAGATTTTTTTCAAGTTTGAATTTGTTCATTTGGAATCTGGGCTCTTCTACTTCATTTTTATTTATTTCTTTTTTATTCCCTTCCGTCATTCCTTAAGTCCCATAGGTTTGATCCTGTAGAATCTGACCCATTTTCTCACTGAGCGAAGGGTACGAAATAAATCAGATTGATTTTTCGATCAAAAGTACTATGTGAAATCTTCGGTTTTTTCCTCTTTCGCTAGCCCTATCCTATAGGCCTATAGGTACAGCCTTTGAATCAATAGAGATTCTTCTATATCTGTATGAATCGATATTATTACATTCCAATTCCTTCCCGACACCTCCCAAGGAAAATCCCGAATTGGATCCCAAATTGACGGGTTAGTGTGAGCTTATCCATGCGGTTATGCACTCTTCGAATAGGAATCCTTTTTCTGAAAGATCCTGGCTTTCGTGCTTTGGTGGGTCTCCGAGATCCTTTCGACGACCTATGTTGTGTTGAAGGGATATCTATATGATCCGATCGATTGCGTAAAGCACGCGGTAGCAACGGAACCGGCGAAAGTATAAAGAAAAGACAGTTCTTTTCTATTCTATCTATTATATTAGTATTAGTATTTTCTATTAGTAATAGATTAGTATTAGTTAGTGATCCTGGCTCAGTGAGTCCTTTGTGATGAACTGTTGGCACCAGTCCTACATTTTGTCTCTGTGGACCGAGGAGAAAGGGGCTTAGCGAGAAGAGGATTGTACCATGAGAGAAGCAAGGAGGTCAACCTCTTTCAAATATACAACATGGATTCTAGCAATGCAATGTAGTTGGACTCTCATGTCGATCCGAATGAATCATCCTTTCCACGGAGGTAAATCTTTGCCTGCTAGGCAAGAGGATAGCAAGTTACAAATTCTGTCTCGGTAGGATATATATGTATTTTATTTCTATTACTATGAAATTCATAAATGAAGTAGTTAATAAATGAAATAGTTAATGGTGGGGTTACCATTATCCTTTTTGTAGTGACGAATCTTGTATGTGTTCCTAAGAAAAGGAATTTGTCCATTTTTCGGGGTCTCAAAGGGGCGTGGAAACACATAAGAACTCTTGAATGGAAAAGAGATGGAACTCCAGTTCCTTCGGAAATAGTAAGATCTTTGGCGCAAGAAGAAGGGGTTGATCCGTATCATCTTGACTTGGTTCTGATTTCTCTATTTTTTTAAGAATACCGAGTCGGGGTCTTCTCCTACCCGTATCGAATAGAACATGCTGAGCCAAATCTTCTTCATGTAAAACCTGCTTTATTTAGATCGGGAAAATCATACGCTTTTATGAAACCATGTGCTATGGCTCGAATCCGTAGTCAATCCTATTTCCGATAGGAGCAGTTGACAATTGAATCCAATTTTTCCCATTATTTTCGTATCCGTAATGGTGCGAAAAGAAGGACCGACTCCAAGTTGTTCAAAAGTAGTGGCGTTGAGTTTCTCGACCCTTTGCCTTCGGATTAGTCAGTTCTATTTCTCGATGGGGGCAAGGGAAGGGATATAACTCAGCGGTAGAGTGTCACCTTGACGTGGTGGAAGTCATCAGTTCGAGCCTGATTATCCCTAAACCCAATGTGAGTTTTTCTATTTTGACTTGCTCCCCCGCCGTCGTGATCGAATGGATAAGAGGCTCGTGGGATTGACGTGAGGGGGTAGGGACGGCTATATTTCTTGGAGCGAACTCTAAGCGAATATGAAGCGCATGGATACAAGTTATGCCTTGAAATGAAAGACAGTTCCGAATCAGCTTTGTCTACGAATAAGGAAGCTATAAGTAATGCAACTAAGAATCTCATGGAGAGTTCGATCCTGGCTCAGGATGAACGCTGGCGGCATGCTTAACACATGCAAGTCGGACGGGAAGTGGTGTTTCCAGTGGCGGACGGGTGAGTAACGCGTAAGAACCTGCCCTTGGGAGGGGAACAACAGCTGGAAACGGCTGCTAATACCCCGTAGGCTGAGGAGCAAAAGGAGGAATCCGCCCGAGGAGGGGCTCGCGTCTGATTAGCTAGTTGGTGAGGCAATAGCTTACCAAGGCGATGATCAGTAGCTGGTCCGAGAGGATGATCAGCCACACTGGGACTGAGACACGGCCCAGACTCCTACGGGAGGCAGCAGTGGGGAATTTTCCGCAATGGGCGAAAGCCTGACGGAGCAATGCCGCGTGGAGGTAGAAGGCCTACGGGTCGTGAACTTCTTTTCCCGGAGAAGAAGCAATGACGGTATCTGGGGAATAAGCATCGGCTAACTCTGTGCCAGCAGCCGCGGTAATACAGAGGATGCAAGCGTTATCCGGAATGATTGGGCGTAAAGCGTCTGTAGGTGGCTTTTTAAGTCCGCCGTCAAATCCCAGGGCTCAACCCTGGACAGGCGGTGGAAACTGCCAAGCTGGAGTACGGTAGGGGCAGAGGGAATTTCCGGTGGAGCGGTGAAATGCGTAGAGATCGGAAAGAACACCAACGGCGAAAGCACTCTGCTGGGCCGACACTGACACTGAGAGACGAAAGCTAGGGGAGCGAATGGGATTAGATACCCCAGTAGTCCTAGCCGTAAACGATGGATACTGGGCGCTGTGCGTATCGACCCGTGCAGTGCTGTAGCTAACGCGTTAAGTATCCCGCCTGGGGAGTACGTTCGCAAGAATGAAACTCAAAGGAATTGACGGGGGCCCGCACAAGCGGTGGAGCATGTGGTTTAATTCGATGCAAAGCGAAGAACCTTACCAGGGCTTGACATGCCGCGAATCCTCTTGAAAGAGAGGGGTGCCTTCGGGAACGCGGACACAGGTGGTGCATGGCTGTCGTCAGCTCGTGCCGTAAGGTGTTGGGTTAAGTCCCGCAACGAGCGCAACCCTCGTGTTTAGTTGCCACCGTTGAGTTTGGAACCCTGAACAGACTGCCGGTGATAAGCCGGAGGAAGGTGAGGATGACGTCAAGTCATCATGCCCCTTATGCCCTGGGCGACACACGTGCTACAATGGCCGGGACAAAGGGTCGCGATCCCGCGAGGGTGAGCTAACTCCAAAAACCCGTCCTCAGTTCGGATTGCAGGCTGCAACTCGCCTGCATGAAGCCGGAATCGCTAGTAATCGCCGGTCAGCCATACGGCGGTGAATTCGTTCCCGGGCCTTGTACACACCGCCCGTCACACTATGGGAGCTGGCCATGCCCGAAGTCGTTACCTTAACCGCAAGGAGGGGGATGCCGAAGGCAGGGCTAGTGACTGGAGTGAAGTCGTAACAAGGTAGCCGTACTGGAAGGTGCGGCTGGATCACCTCCTTTTCAGGGAGAGGTAATGCTTGTTGGGTATTTTGGTTTGACACTGCTTCACACCCCAAAAGAAGGGAGCTACGTATGAGTTAAACTTGTCGACGGAAGTCTTCTTTCGTTTCTCGACGGTGAAGTAAGACCAAGCTCATGAGCTTATTATCCTAGGTCGGAACAAGTTGATAGGATCCCCCTTTTTTTCGCCCCCATGTCGCCACGCGGGAGGGACATGGGGGCGAAAAAAGGAAAGAGAGGGATGGGGTTTCTCTCGCTTTTGGCATAGCGGGCCCCCGGCGAGAGGCCCGCACGACGGGCTATTAGCTCAGTGGTAGAGCGCGCCCCTGATAATTGCGTCGTTGTGCCTGGGCTGTGAGGGCTCTCAGCCACATGGATAGTTCAATGTGCTCATCAGCGCCTGACCCTGAGATGTGGATCATCCAAGGCACATTAGCATGGCGTACTTCTCCTGTTCGAACCGGGGTTTGAAACCAAACTTCTCCTCAGGAGGATAGATGGGGCGATTCGGGTGAGATCCAATGTAGATCCAACTTTCTATTCACTCGTGGGATCCGGGCGGTCCGGGGGGGACCACCATGGCTCCTCTCTTCTCGAGAATCCATACATCCCTTATCAGTGTATGGACAGCTATCTCTCGAGCACAGGTTTAGGTTCGGCCTCAATGGGAAAATAAAATGGAGCACCTAACAACGTATCTTCACAGACCAAGAACTACGAGATCGCCCCTTTCATTCTGGGGCGACGGAGGGATCGTACCATTCGAGCCTTTTTTTTTCATGCTTTTCCCGGAGGTCTGGAGAAAGCTGCAATCAATAGGATTTTCCTAACCCTCCCTTCCCGAAAGGAAGAACGTGAAATTCTTTTTCCTTTCCGCAGGGACCAGGAGATTGGATCTAGCCGTAAGAAGAAGGCTTGGCTGATAAATAACTCACTTCTTGGTCTTCGACCCCCTCAGTCACTACGAACGCCTCCGATCAGTGCAATGGGATGTGTCTATTTGTCTATCTCTTGGCTCGAAATGGGAGCAGGTTTGAAAAAGGATCTTAGAGTGTCTAAGGTGGGGCCAGGAGGGTCTCTTAACGCCTTCTTTTTTCTTCTCATCGGAGTTATTTCAAAAAGACTTGCCATGGTAAGGAAGAAGGGGGGAACAAGCACACTTGGAGAGCGCAGTACAACGGAGAGTTGTATGCTGCGTTCGGGAAGGATGAATCGCTCCCGAAAAGGAATCTATTGATTCTCTCCTAATTGGTTGGACCGTAGGTGCGATGATTTACTTCACGGGCGAGGTCTCTGGTTCAAGTCCAGGATGGCCCAGCTGCGCCAAAGAAAAGAATAGAAGAAGCATCTGACTCCTTCATGCATGCTCCACTTGGCTCGGGGGGATATAGCTCAGTTGGTAGAGCTCCGCTCTTGCAATTGGGTCGTTGCGATTACGGGTTGGATGTCTAATTGTCCAGGCGGTAATGATAGTATCTTGTACCTGAACCGGTGGCTCACTCTTTCTAAGTAATGGGGAAGAGGACCGAAACATGCCACTGAAAGACTCTACTGAGACAAAGATGGGCTGTCAAGAACGTAGAGGAGGTAGGATGGGCAGTTGGTCAGATCTAGTATGGATCGTACATGGACGATAGTTGGAGTCGGCGGCTCTCCTAGGGTTCCCTCATCTGGGATCCCTGGGGAAGAGGATCAAGTTGGCCCTTGCGAACAGCTTGATGCACTATCCCCCTTCAACCCTTTAGCGAAATGCGGCAAAAGGAAGGAAAATCCATGGACCGACCCCATCGTCTCCACCCCGTAGGAACTACGAGATCACCCCAAGGACGCCTTCGGCATCCAGGGGTCGCGGACCGACCATAGAACCCTGTTCAATAAGTGGAAGGCATTAGCTGTCCGCTCTCAGGTTGGGCAGTAAGGGTCGGAGAAGGGCAATCACTCATTCTTAAAACCAGCATTCTTAAGCCAAAGAGTGGGGCGGAAAGGGGGAAAGCTCTCCGTTCCTGGGTTTCCTGTAGCTGGATCCTCCGGAACCACAAGAATCCTTAGTTAGAATGGGATTCCAACTCAGCACCTTTTGAGATTTTGAGAAGAGTTGCTCTTTGGAGAGCACAGTACGATGAAAGTTGTAAGCTGTGTTCGGGGGGGAGTTATTGTTTATCGTTGGCCTCTATGGTAGAATCAGTCGGGGGGCCCGAGAGGCGGTGGTTTACCCTGTGGCGGATGTCAGCGGTTCGAGTCCGCTTATCTCCAACTCGTGAACTTAGCCGGTACAAAGCTATATGATAGCACCCAATTTTTCCGATTCGGTAGTTCGATCTATGATTTATCATTCATGGACGTTGATAAGATCCTTCCATTTAGCAGCACCTTAGGATGGCATAGCCTTAAAGTTAAGGGCGAGGTTCAAACGAGGAAAGGCTTACGGTGGATACCTAGGCACCCAGAGACGAGGAAGGGCGTAGTAAGCGACGAAATGCTTCGGGGAGTTGAAAATAAGCGTAGATCCGGAGATTCCCGAATAGGTCAACCTTTCAAACTGCTGCTGAATCCATGGGCAGGCAAGAGACAACCTGGCGAACTGAAACATCTTAGTAACCAGAGGAAAAGAAAGCAAAAGCGATTCCCGTAGTAGCGGCGAGCGAAATGGGAGCAGCCTAAACCGTGAAAACGGGGTTGTGGGAGAGCAATACAAGCGTCGTGCTGCTAGGCGAAGCGGTGGAGTGCTGCACCCTAGATGGCGAGAGTCCAGTAGCCGAAAGCATCATTAGCTTATGCTCTGACCCGAGTAGCATGGGGCACGTGGAATCCCGTGTGAATCAGCAAGGACCACCTTGCAAGGCTAAATACTCCTGGGTGACCGATAGCGAAGTAGTACCGTGAGGGAAGGGTGAAAAGAACCCCCATCGGGGAGTGAAATAGAACATGAAACCGTAAGCTCCCAAGCAGTGGGAGGAGCCCGGGGCTCTGACCGCGTGCCTGTTGAAGAATGAGCCGGCGACTCATAGGCAGTGGCTTGGTTAAGGGAACCCACCGGAGCCGTAGCGAAAGCGAGTCTTCATAGGGCAATTGTCACTGCTTATGGACCCGAACCTGGGTGATCTATCCATGACCAGGATGAAGCTTGGGTGAAACTAAGTGGAGGTCCGAACCGACTGATGTTGAAGAATCAGCGGATGAGTTGTGGTTAGGGGTGAAATGCCACTCGAACCCAGAGCTAGCTGGTTCTCCCCGAAATGCGTTGAGGCGCAGCGGTTGACTGGACATCTAGGGGTAAAGCACTGTTTCGGTGCGGGCCGCGAGAGCGGTACCAAATCGAGGCAAACTCTGAATACTAGATATGACCTCAAAATAACAGGGGTCAAGGTCGGCCAGTGAGACGATGGGGGATAAGCTTCATCGTCGAGAGGGAAACAGCCCGGATCACCAGCTAAGGCCCCTAAATGACCGCTCAGTGATAAAGGAGGTAGGGGTGCAGAGACAGCCAGGAGGTTTGCCTAGAAGCAGCCACCCTTGAAAGAGTGCGTAATAGCTCACTGATCGAGCGCTCTTGCGCCGAAGATGAACGGGGCTAAGCGATCTGCCGAAGCTGTGGGATGTAAAAATGCATCGGTAGGGGAGCGTTCCGCCTTAGAGGGAAGCACCCGCGCGAGCAGGGGTGGACGAAGCGGAAGCGAGAATGTCGGCTTGAGTAACGCAAACATTGGTGAGAATCCAATGCCCCGAAAACCTAAGGGTTCCTCCGCAAGGTTCGTCCACGGAGGGTGAGTCAGGGCCTAAGATCAGGCCGAAAGGCGTAGTCGATGGACAACAGGTGAATATTCCTGTACTACCCCTTGTTGGTCCCGAGGGACGGAGGAGGCTAGGTTAGCCGAAAGATGGTTATCGGTTCAAGGACGCACGGTGTCCCTGCTTTTTCAGGGTAAGAAGGGGTAGAGAAAATGCCTCGAGCCAATGTTCGAGTACCAGGCGCTACGGCGTTGAAGTAACCCATGCCATACTCCCAGGAAAAGCTCGAACGACCTTCAACAAAAGGGTACCTGTACCCGAAACCGACACAGGTGGGTAGGTAGAGAATACCTAGGGGCGCGAGACAACTCTCTCTAAGGAACTCGGCAAAATAGCCCCGTAACTTCGGGAGAAGGGGTGCCTCCTCACAAAGGGGGTCGCAGTGACCAGGCCCGGGCGACTGTTTACCAAAAACACAGGTCTCCGCAAAGTCGTAAGACCATGTATGGGGGCTGACGCCTGCCCAGTGCCGGAAGGTCAAGGAAGTTGGTGACCTGATGACAGGGGAGCCGGCGACCGAAGCCCCGGTGAACGGCGGCCGTAACTATAACGGTCCTAAGGTAGCGAAATTCCTTGTCGGGTAAGTTCCGACCCGCACGAAAGGCGTAACGATCTGGGCACTGTCTCGGAGAGAGGCTCGGTGAAATAGACATGTCTGTGAAGATGCGGACTACCTGCACCTGGACAGAAAGACCCTATGAAGCTTCACTGTTCCCTGGGATTGGCTTTGGGCCTTTCCTGCGCAGCTTAGGTGGAAGGCGAAGAAGGCCCCCTTCCGGGGGGGTCCGAGCCATCAGTGAGATACCACTCTGGAAGAGCTAGAATTCTAACCTTGTGTCAGGACCTACGGGCCAAGGGACAGTCTCAGGTAGACAGTTTCTATGGGGCGTAGGCCTCCCAAAAGGTAACGGAGGCGTGCAAAGGTTTCCTCGGGCCGGACGGAGATTGGCCCTCGAGTGCAAAGGCAGAAGGGAGCTTGACTGCAAGACCCACCCGTCGAGCAGGGACGAAAGTCGGCCTTAGTGATCCGACGGTGCCGAGTGGAAGGGCCGTCGCTCAACGGATAAAAGTTACTCTAGGGATAACAGGCTGATCTTCCCCAAGAGCTCACATCGACGGGAAGGTTTGGCACCTCGATGTCGGCTCTTCGCCACCTGGGGCTGTAGTATGTTCCAAGGGTTGGGCTGTTCGCCCATTAAAGCGGTACGTGAGCTGGGTTCAGAACGTCGTGAGACAGTTCGGTCCATATCCGGTGTGGGCGTTAGAGCATTGAGAGGACCTTTCCCTAGTACGAGAGGACCGGGAAGGACGCACCTCTGGTGTACCAGTTATCGTGCCCACGGTAAACGCTGGGTAGCCAAGTGCGGAGCGGATAACTGCTGAAAGCATCTAAGTAGTAAGCCCACCCCAAGATGAGTGCTCTCCTATTCCGACTTCCCCAGAGCCTCCGGTAGCACAGCCGAGACAGCGACGGGTTCTCTGCCCCTGCGAGGATGGAGCGACAGAAGTTTTGAGAATTCAAGAGAAGGTCACGGCGAGACGAGCCGTTTATCATTACGATAGGTGTCAAGTGGAAGTGCAGTGATGTATGCAGCTGAGGCATCCTAACAGACCGGTAGACTTGAACCTTGTTCCTACATGACCCGATCAATTCGATCAGGTACTCGCCATCTATTTTTATTGTTCAACTCTTTGACAACATGAAAAAACCAAAAGCTCTGCCCTCCCTCTCTATCGATCCAAGGGATGGAAGGGCGGAGGCCTTTGGTGTCCCCTCCAGTCAAGAATTGGGGCCTCACAATCACTATCCAATATGTTTTTCTCTCATGCCTTTCTTCGTTCATAGTTCGATATTCTGGTGTCCTAGGCGTAGAGGAACCACACCAATCCATCCCGAACTTGGTGGTTAAACTCTACTGCGGTGAAGATACTGTAGGGGAGGTCCTGCGGAAAAATAGCTCGACGCCAGGATGATAAAAAGCTTAACACCCCTCATTCTTATTACTTTTTCAATATGAAAAAAAATGAAAAGGTCGTCTTATCTTATTCAAAACCCCAATTATGAAATCTCTTCTCTCCCACTTCACACCTCGGAACGCACCGTTCTTATAGAGAGAGAGGCGCTTTCGCATCTTCTTAACCCGAAAGGGCTGGGGAGAGGAAAGGTTCCTTTTTTAGGGTACTCCCAGGAACAGATCCAGTGGAGACAGGGTGGGGCCTGTAGCTCAGAGGATTAGAGCACGTGGCTACGAACCACGGTGTCGGGGGTTCGAATCCCTCCTCGCCCACAACCGGCCAAAAAGGGAAGGACCCCTCCCTCTGGAGGTAGGAAAATCATGATCGGGATAGCGGATCCAAGGCTATGGAACTTGGGTGTAGGTCTTGTGTCAAAATAGAATGGCCTCACTTTTTCTTCTTTTTATTTCTTATTTCTTCTTGATATATATATCGTTAATGCCGGAATCCGTCGGACCAAATCAGCATATTTTTTTGTTTTACGCCCCGTAACTCTTCCTCAGCCAGGCTTGGGCAGAATAGCAGAGCAAGTATTGGTAGCATAGCAAAAATGTGTTCGTCGTCATTAATATGTTTGCTCGCGGTAATTGTGGCCTCTCGGCAGAATCGATGACTGCATCTTTGATGCACTTGCTAGTACATCTGAAAATTCTTAATTGGCTAGTTGTAAATAGCCCCAGACTATGGAACAAAGGATTATACCGGACTTATCTACACCGAGGTATTGACGGTGATTCTCAAATATCGCAGAACAGAATGTGATATGATGAGATAGAATGCAATAGAAAGAAAGCCACAGGGAACGGGTTACCTACTCTTAACGGTCAAAGCAAACCCTTTCATTCCGAATTCTTTAATTCGGAATGAATCAAATCTCCCCAAGTAGGATTCGAACCTACGACCAGTCAGTTAACAGCCGACCGCTCTACCACTGAGCTACTGAGGAACAACGGGAGATTAGATCTCGTAGAGTTCAATTCCCGTTCTTAACCCATGACCAATATGAGCTCGAAGTTTCCTTCGTAACTCCCGAAACTTCTTCGTAGTGTCTTTGTTCCATGCCTCATTTCATAGGGAACCTCAAAGTGGCTCTATTTCATTATATTCCATCCATATCCCAATTCCATTCATTTAATATCCCCTTTGGTGTCATTGACATAAGAGATGTCGTTTCTAGTCTATCTGTTTCTATTTCTATATGCTATTTCTATATATATGGAAAGTTTCAAAATCATCATATAATAATCCAGAAATTGCAATAGAAAAGAAAAAGGGGGTTTGTGATATGATTTTGAAATCTTTTATACTAGGTAATCTAGTATCCTTATGCATGAAGATAATCAATTCGGTCGTTATGGTCGGACTCTATTATGGATTTCTGACCACATTCTCCATGGGGCCCTCTTATCTCTTCCTTCTCCGAGCTCGGGTTAGAGAAGAAGGAGAAGAAGGAACCGAGAAGAAGGTATCAGCAACAACAGGTTTTATTACGGGACAGCTCATGATGTTCATATCGATCTATTATGCGCCTCTGCATCTAGCATTGGGTAGACCTCATACAATAACTGTCCTAGCTCTACCGTATCTTTTGTTTCATTTCTTCTGGAACAATCACAAACACTTTTTTGATTATGGATCTACTACCAGAAATTCAATGCGTAATCTTAGCATTCAATGTGTATTCCTGAATAATCTCATTTTTCAATTATTCAACCATTTCATTTTACCAAGTTCAATGTTAGTCAGATTAGTCAATATTTATATGTTTCGATGCAACAACAAGATGTTATTTGTAACAAGTAGTTTTGTTGGTTGGTTAATTGGTCACATTTTATTCATGAAATGGGTTGGATTGATATTAGTCTGGATACAGCAAAATCATTCTATTAAATCGAATGTATTTATTCGATCTAATAAGTACCTTGTATCAGAATTGATAAATTCTATGGCTCGAATCTTTAGTATTCTCTTATTTATTACCTGTGTCTACTCTTTAGGCAGAATGCCGTCACCCATTTTGACTAAGAAACTGAAAGAAACCTCAGAAAGGGAAGAAAGGGAGGAAGAAACAGATGTAGAAATAGAAAAAACTTCCGAAACAAAAGAGATAGACTATAAAAATAGACAAATTTTTGAAATTTTATATTCTTATGATTTAGATGGTAATCAAAAAAGTAGTAAATTACTAAAAAAAAAAGATCTCTTCTGGTTTGAAAAACCTCTTGTAACTAGTCTTTTCGACTACAAACGATGGAATCGTCCGTTTCGATATATAAAAAATGATCAATTTGAAAATGTTGTACGGCAGGAAATGTCACAATATTTTTTTTATACATGTCAAAGTGATGGAAAAGAAAGAATATCTTTTACATATCCAAAAAGTTTGTCAACTTTTTTAGAAATGATACAAAGAAAAATGTCTCTGTTTACAACAAAGAAACTCTCCCTTGATGAATTGTATAATCATTGGAATTCTAACAATGAAAAAAAAAGGAAAAACTTAAATAAAGAGTTTATAAATAGAGTCGAAACCCTAGATCCGAGACTTCTTGTTCCGAATACACTAGAAAAAAGGACTAGATTGTGTAATGATGAAACTAAAAAAAAATACTTACCTAAAACTTATGATCCCTTATTGAGTGGATCCCGTCGAGGAAGAATGAAATTTGGTTTTTCATCATCAATCATAAATGAAACTTCGATAAAAAATTACATAGAAAGGGTTTGGATAAATAAAATTTATCTTATCCTTCTTATTACCAATTATCTAGAATTTGAATCAAAAAAGGATCCATTTCATTTTAATATAAAATTATTTTCAACAGAAATCGGTTATTTCTTGAACTTAATTAATGAATTTGCTGGTAAATCAGCATCAAGTTTAAATTTTAAAATACTTTCTTTATTTCCAGATTACAAAGAAGAAAAAATGTATTCAGAAGATCGAATAAAAATTTTAAAATTTTTATTGGAGGCAGTTATAACCTATCCCAACAACAAAACAATTAGAAAAAAATTTACTGAAATAAAAGAAATAAGCAAACAAGTTTCTCGGTGCTCATATAAATTACTCGACGAGTTGGAACAACAAGAGGGAGAAAATGAGGAAAACGTGATAGAGGATCATGAAATTCGTTCACGAAAAGCCAAGCGTGTAGTAATTTTTACTGACAATCAACAAAACAATGATCCTTATAATACTAGCAAGGATAAAATAAATTCTGATCAAATAGACGAAGTGTCTTTGATACGTTATTCACAACAATCCGACTTTCGTCGCGATATAATAAAAGGATCTATCCGAGCACAAAGACGCAAAATCGCTATTTTGGAACTGTTTCAAGCAAATGTGCATTCACCCCTTTTTTTGGACAGAATAGATAAATCTATTTTTTTTTCTTTTGATATTTCAGAGCTGATGAAAATAATATTTCTAAATTGGATATGTAAAAACACAGAATTGACAATTTTGAATTATACAGAAAAAAAAAAAAAAGAAAGTGAGAAAAAAGACGAGAACAAACGAGAAGAAGACAAAAGAGAGGAGAAAGTCCGGATAGAAATTGCCGAAGCCTGGGATAGTATTATATGTGCTCAAATAATAAGGGGTTCGCTTTTAGTAACCCAATCAATTCTTAGAAAATATATAATCTTGCCCTCATTAATAATAGCTAAAAATATAATTCGTATGCTATTTTTTCAATTTCCCGAATGGTCCGAAGATTTAAAGGATTGGAATAGAGAAATGCATGTTAAATGCACCTATAATGGAGTTCAATTATCAGAAACAGAATTTCCGCAAAACTGGTTAACAGACGGTATTCAAATAAAGATCTTATTTCCTTTTCGTCTAAAACCTTGGCACAGATCTAAGTTAAAAATTTCTCATACTCATAAAGATCCAATGAAAAAGAAAGGGCAAAAAAATGAGTTTTGTTTTTTAACAGTTTTTGGAATGGAAGTTGAACTCCCTTTTGGCTCCCCCCGAAAACGACTTTCACTTTTTAACCCCATATTTACAAAACTAAAAAAAAAAATTAGAAAGTTGAAAAAAAATTGTTTTCTAGTTATAAAAATTTTAAAAGAAAGATTCTTTCTAAATTTTTCAAAAGAAATAAAAAACCGGGTCATCAAAAGCATTCTATTTCTAAAAGAAATAATAAACAAACTTTCAAAATTAAAAAGAAACCCAATTCTATTATTTGGATTTAGAGAAGTATATGGATTGAATGAAACTAAAAAAGATCTGATAATCAATAATCGAATGACTTTTCAATTTTCTACTCAACTTCAATCTATGGAATCTATGGACTGGACAAATTTTTCACTGACAGAAAAAAAAATGAAAGATCTCACTGATAGAATAAACACAATACTAAATCAAATCGAAAACATTACAAAAGAAAAGACAAAAAGATTTATAACCTCAGAGATCAATATTAATCCTAACAAAATAAATGATCCTGCTAACAGATTCAAATTAAAATCATCAAAAAATATTTCAAATATATTGAAAAGAAAAAAAAGTCAATTAGTCCACAAATCACATTTTTTTATAAGAATTTTGATTGAAAGAATATACATAGATATCTTTCTTGGTATCATTAATATTCCAAGGATTAATGCTCCATTTTTTTTTGAATCAACAAGAAAAATTATTAATAAATACATTTACTATGATGAAGAAAATCATAAAAAAATGGATAAAAGAAATGAAAATGCAATTCACTTTATTTCAACTATAAAAAAGTCACTTATTAATGATAGTAGCGTTCTTACTAAGAATTCACAGCTTTTTTGTGATGTATCCTCCTTGTCACAAACATATGTACTTTACAAATTATCACAAATCCAAGTTATTAACATATATAAGTTAAGATCTGTCCTTCAATATAAAGGAACACCCCTCTTTCTTAAGAAAGAAATAAAAGATTATTTTGCCATCCAGGGACTATTTCATTCTAAGTTAAAAGATAAAAATTTTCGAAATTCTGTAATCAATCAATGGAAAAACTGGTTAAAGAGTCATTACCAATATAAATATGATTTATCTCCGATTAGATGGTCTAGATTAATATCACAAAAAAGGCGAAACAAGATCAATCAAGACCGTATGGTTCAAAATAAAGATAAAAATTTAAACAAATTGAATTTATATGAAAAAAACCAATTAATTCATTACGAAAAGCAAAATGATCTTGAAGGCGACTCATTATCGAACCAAAAAGAGAATTTTAAAAAACACTATCGATATTATCTTTTATCATATAAATTTATTAATTATGAAGAGAAAAAAGATTCATCTATATATAGATTCCAAGTAAAGAATAAACAAGAGATTTCCAACACAGAAAAAAGCAAATTACTTGATATATTGGAAGATATCCCTATCAATAATTTTCTAACAGAAAAACCTATTGTCGATATGAATAAAAGTCCAACTAGAAAATATTTTGATTGGAAAATTCTCTATTTTTGTCCTAGAAATAAGGTCAATATTGACTGCTGGATCAATACCGGAACGAAACAAAAAAAAAATAAGAATAAAACTAGCCCTAATAAGTATCAAATAATTGATAAAATTGATAAAAAAGGTCTTTTTTTTTTTACGATTCCAAAATATGAAAAAAAAGTACTTTCATCCAATCAAAAGGCTTTTTTTTTTGATTGGATGGGAATGAATGAAGAAATACTCAATCACCCCATATTCAATTTTGAACTTTGGTTTTTTCAAAAATTTGTAATACTTTCCAACACCTACAAGATAAAACCATGGTCGATACCAATCAAATTACTTCTCTTAAATTCAAATGGAAATGAACCTGCTCATAAAAATAAAAAAATCAACGAAAAGAGAAAGAAAAGTGGAGATCCTCTTATATCTATATCATCGACCGAAAAAAAATCTATTGAATTAGCGAATGGAAATCAAGAAGAAAAAGAATCTGAGGATCAAGTGTATCTGGTATCAGTTTTCGCAAATCAAGAAAAAGATATTGAAGAAGCTTATGCGGGATCAGGCATGAAAAAACGTAGAAAGAAAAAGCAATACAAAAATAATACGGAAGCAGAACTCGATTTCTTCCTAAAAAGGTATTTACGTTTTCAATTAAGATGGGATGATTCTTTAAATCAAAAAATAATCAATAATATCAAAGTATATTGTCTCCTGCTTAGACTACCCAATCCACGAGAAATTATTTTATCCTATATCCAAAGGGGAGAAATGAGTCTGGATATTCTAATGACTCAGAAGAATGTAACTCTCACAGAATTGATGAAAAAGGGAATCCTGATTATTGAACCAGTTCGTTTGTCAGTAAAAAATGATGGACAATTTTTTATATATCAAATCATAGGTATTTTATTGGTTCATAATAGCAAACAACAAATTAATCAAAGATACAGAGAAAAAAGTTATGTTGATAAAAAGAATTTTACCGCACCGATTGAAAGAAATCAAAATATAACTGGAAATAGAGATAAAAATCATTATGATTTACTTGTTCTTGAAAATGTTTTCTCCCCTAAACATCGTAGAGAATTGAGAATTTTAATGTTGTTCAATTCAAAAAATAGAAATGATATTCATATAAATACAAAAATTTTCAATGCTAATAACATAAAAGACTATGGTCCCATTCTGGATAAAAGCAAACATTTTGATAAAACTAAAAACAAACTAATTAAATTAAAGCTTTTTCTTTGGCCCAATTATCGATTAGAAGATTTAGCTTGTATAAATCGCTATTGGTTTGATACCAATAATGCCAGTCGTTTCAGTATGCTAAAGATACATATATATCCACCATTGAAAATTTAGTAAGAGTACATCTTTCATATATCTCATAGCATGTCTGATCTAGTATAAAAAAATGAACACATGTGTTGGTTTCCATTCCATATTCCATTCGGATACATAGAATTCAACCACATATCAATTGTATCTAGAGATGAAAAATGGAAGTTTTTTTTCCTTTTAGGTATAATTTTTTTTTTTCTTTTGTAAGCGAAGAAATATATCATCTTTTTTTATTCGGTTAGAAATAAAAAAAATTGGATTGCTTAATGATCGATTTTATTTAACAAAATTAGGAATTCTTACCGAAGGAAAGATTCTTTATTGTGTATAACATAAAATAAACTGACATTATTATTTATTACATTATTTATTATTACTGATCAATAAAAAAATATCTTAAAATAAGATAAGAAAAGGGAGCTTTTTTTATGGTAAAAAATTCATTCATTTCAATTATTTCACAAAAACAAAAAGAAGGAAACACGGGATCTGTTGAATTTCAAATAAAAAGTTTCACTAATAAGATACGAAGACTTACTTCACATTTGGAATTACATAGAAAAGACTATTTATCTCAGAGAGGTTTACGGAAAATTCTAGGAAAACGTCAACGACTCCTATCTTATTTGGCCAAGCAAAATAGAATGCGTTATAAAGAATTAATTAACCAATTGGATATTCGGGAGTCAAAAACTCGTTGATTTGAAGAGTTCTTTTTTGAATTATTTGATTTATGAGATCTTGAATTTTGATGAATTTATTTTCGTTTTCAGTAATTCATAGAAGAACGAATCGAGGAAATCCCTATGAATGTACCAGTTCCAAGAGAAGACCTTATGATAGTCAATATGGGCCCTCACCACCCATCAATGCATGGTGTTCTTCGACTGATCGTTACTCTAGACGGTGAAGATGTTATTGACTGTGAACCAATTTTAGGTTATTTACACAGAGGAATGGAAAAAATTGCGGAAAACCGAACAATTATACAATATTTGCCTTATGTAACACGTTGGGATTATTTAGCTACGATGTTCACAGAAGCAATAACAGTAAATGGGCCAGAACAGTTGGGAAATATTCAAGTACCTAAAAGGGCCAGCTATATCCGAATAATTATGTTGGAGTTAAGTCGTATAGCCTCTCATCTCTTATGGCTTGGCCCTTTTATGGCAGATATTGGCGCACAGACTCCTTTCTTCTATATTTTTAGAGAAAGAGAATTAATATATGATTTATTCGAAGCTGCAACTGGTATGAGAATGATGCATAATTTTTTTCGTATCGGCGGAGTGGCGGCTGATCTACCTCATGGATGGATAGATAAATGTTTGGATTTCTGTGATTATTTTTTAATAGGAGTTACTGAATATCAAAAACTTATTACGCGAAATCCTATTTTTTTAGAACGAGTTGAAGGAGTAGGTATTGTTGGTACGGAGGAAGCAATAAATTGGGGGTTATCAGGACCGATGCTACGAGCTTCCGGAATACAATGGGATCTTCGTAAAGTTGATCATTATGAGTCTTATGACGAATTTGATTGGGAAGTTCAGTGGCAAAAAGAAGGAGATTCATTAGCTCGTTATTTAGTTCGAATTGGTGAAATGACGGAATCCATAAAAATTCTTCAACAAGCTCTGGAAGGAATCCCAGGAGGACCCTATGAGAATTTAGAAACCCGATGTTTTGATAGAGAAAGGGATCCAGAGTGGAATGATTTTGAATATCGATTCATTAGTAAAAAAACTTCTCCTACTTTTGAATTACCGAAGCAAGAACTTTATGTAAGAGTCGAAGCCCCAAAGGGGGAATTGGGGATTTTTCTGATAGGGGATCAGAGTGGGTTTCCTTGGAGATGGAAAATTCGCCCGCCGGGTTTCATCAATTTGCAAATTCTTCCTCAATTAGTTAAAAGAATGAAATTGGCTGATATTATGACAATACTAGGTAGCATAGATATCATTATGGGAGAAGTTGATCGTTGAAATGATAATTGATACAACAAAAGTACAAGCTATACATTCTTTTTTCAGATTGGAATCCTTAAACGCGGTTTATGGAATTATATGGATGCTTGTTCCTATTTTGACTCTTGTATTTGGAATCACACTAGGCATACTCGTAATTGTGTGGTTAGAAAGAGAAATATCCGCAGGACTACAACAACGTATTGGACCTGAATACGCTGGCCCTTTGGGGGTTCTTCAAGCTCTAGTGGATGGGACAAAACTACTTTTCAAAGAGAATCTTTTTCCATCTAGAGGGAATAATCATTTATTTAGTATCGGACCGTCCATAGCAGTCATATCAACTCTATTAACCTATTCAGTAATTCCTTTTAGTTATCACCTTGTTTTAGCTAATCTAAATATCGGTGTTTTTTTATGGATTGCTATTTCAAGTATTGCTCCGATTGGACTTCTTATGTCAGGATATGGATCAAATAATAAATATTCCTTTTTAGGTGGTCTACGAGCTGCTGCTCAATCAATTAGTTATGAAATACCATTAACTCTCTGTGTATTATCCATATCTCTACGTGTGATTCGTTGAAAGAAAAACTTTTCCATATTATTTTTCCTTTCTTTTTTTAGTTTTTTAGGAAGAAGGTGAAATGAATTGAATAGATATTTTCATTTTTTATTTATCATTTTCTTTGATGAACTCAATTAGATAGTTATATGAGTGAAAGAAAACTGCTGCTAAATTTGTAGTACAAAATTGAGACTCATTTCCTATGTGCAAGAGGAAACCGGAAATAGACATAAGAAGACGAGATTATTTGCCCCAAGATTGGTTGATTAGTCATCCTGGCTTGAAGCGGGCTCAAAAGACAAACCTTATTCAGTTTTCACTATTATTTCTATGTATTACCATAATGCTAACGGGTGATTGAGCAAAAAGGAGTGGATGGTTAGGAACACCAAGATACACAAAGGATTAGTAATAGAGATTATTAAAATAGTCCAAAAGAATATTTCTGCATAATATACATATACATAAGATAATAATATAAATTAATATTCTTTAATATTTAATATAATAATATAACTATATATAAGAATATAAAAAGAATATTAATGGGGGCTTTAAGTTGGTAGAACTGATTAGGTAGGACTCCCCATGATTCCGATTTAGAGTATGCTGCCGCCCACCGATTAAAGAAATAACTATCAGGAACGAAAGAATCCTTTCCTTTTTAAGTTCACTTTTCTTTTTTCATAAATTCATAAAGAAGAATAGGAAAAAAAATGAATCTAATTACAATAGAAAAGAAAAAGAGATCTTTTTTATTCTTTCTTGTTTATAGCCATATTCATACAGATCGAATTCTTGTTATAATTCGGGAACTAATGGACTGCCTAATTCTTTTTTGAATCGACAACAATAGATTGAACTACCTATGTTCTACAAGCAGTATTTTTCATTTTTACATTATAACGAGTATTTTATTAAAGGATTAAAAAAAAGTTATTACTCAAGAAAGAAAAACATAAATTCTTAAAGGATAAGATCAATTCAGAAGTACTTTTTTAGTATTATAACAGAAAGAATTTTATTGGTCGAATTTTGGGTTTTGGAAAGTTCAATAGATTTTGATCCTATCTATCCTACAAATAAGAAATAGATCAAGAAAGAACAAATAGATCAAGATAAATAATATGATCCTGCCCTTAGATTTATTTAAGTCCTTCGAGGAGCCGTATGAGGTGAAAATCTCATGTACGGTTCTGTAATAGCGATGGAAACAGTGATGTTATCACCGACTATGATTATCTAACAGTTCAAGTACAGTTGATATAGTTGAAGCACAATCAAAATATGGTTTTTGGGGGTGGAATTTGTGGCGTCAACCTATAGGGGTTATCCTTTTTTTCATTTCTTCCCTAGCAGAATGTGAAAGACTACCTTTTGATTTACCAGAAGCAGAAGAAGAATTAGTAGCAGGGTATCAAACCGAATACTCGGGTATCAAATTTGGTTTATTTTATGTTGCTTCCTATCTAAACTTATTAGTTTCTTCATTATTTGTAACAGTTCTTTACTTGGGCGGTTGGAATATCTCTATTCCGCATATATTTGTTCCTGAACTTTTTGAAATAAATAAAGTGGGTGAGGTCTTTGGAACAATGATTGGTATCTTTATTACATTGGTTAAAACATATTTGTTCTTGTTCATTCCTATCACAACAAGATGGACTTTACCTAGATTAAGAATGGACCAATTATTAAATCTTGGATGGAAATTTCTTTTACCTATTTCTCTCGGTAATCTATTATTAACAACCTCCTCTGAACTCCTTTCACTATAAGTACTCTAAAGAAATCCTTTTCTATATTCACAACTTGTCTGAAACAAGAGAAAGAAACAAAGAAAAACCTATTTATAAATATTCACGATATGCTCCCCATGGTAACTGGGTTCATGAATTATAGTCAACAAACCATCCGAGCTGCAAGGTACATTGGTCAAAGTTTCATGATTACCTTATCTCATGCAAATCGTTTACCTATAACTATTCAATATCCTTATGAAAAATTAATTACATCGGAACGTTTCCGGGGCCGAATTCATTTTGAATTCGATAAATGCATTGCTTGTGAAGTATGTGTTCGTGTATGTCCTATAGACCTACCCGTTGTTGATTGGAAATTGGAAACTGACATTCGAAAGAAAAGATTGTTTAATTACAGTATTGATTTTGGAATCTGTATATTTTGTGGCAACTGTGTTGAGTATTGTCCAACAAATTGTTTATCAATGACTGAAGAATATGAGCTTTCTACTTATGATCGTCACGAATTAAATTATAATCAAATTGCTTTAGGCCGTTTACCTATGTTAGTAATTGACGATTATACAATTCGAACAGTTTTAAATTCGCCTCAAAAAAAGGGAAATCCATTTTGATTAAAGATTGATTAAAAAGCAATTTCCAATTATTAAATGTGGAATAGTATTTTTTTTTCATTTTACTTGAGCAATAACTATAAAAACTACAAGTGCTTAGTTGGTGAGAATCACGTCGGGACTAAATTTGTATTGAAGATCTATTAATATTCGAAATTTCAATTTCGAGTGTCGAATTATCCTTTTCGAGAAAGACTGAAATTAGGCCAATAGTTGTACCTACAGTAAATTACACCCCTTGGGGTTTAATTCAATTAAGAACCAATTATAAAATAGTTTTTCCTGGTCGGGTCAAGAAGGTCATGAAAAAAAATTCGATTTTTTTATCTCTTATTTTACGTACAATGGATTTGCTTGGGTCAATACATGATTTTCTTTTAGTCTTTCTGGGTTTTGGTCTTATATTAGGAGGTCTAGGAGTGGTATTAGTTACCAATCCAATTTATTCTGCCTTTTCGTTGGGGTTGGTTCTTGTTTGTATATCTTTATTCTATATTTTATCAAACTCTCCTTTTGTAGCTGCCGCACAACTCCTTATTTATGTGGGAGCTATAAATGTTTTAATTCTATTTGCTGTGATGTTTATGAATGGTCCAGAATATTCAAAAGATTTGAATCTTTGGAATGTTGGGGGTGGGATTACCCTTTTTGTTTGTACAAGTATTTTTGTTTCACTAATTAGTATTGTTCTAGATACGTCATGGTACGGGATTATTTGGACTACAAGACCAAATCAGATTATAGAGCAAGAGTTGATAAGTAATGGTCAACAAATTGGAATTCATTTATCAACAGATTTTTTCCTTTCATTTGAATTTATTTCAATAATTCTTTTAGTTGCTTTGATAGGTGCAATCGTTGTGGCTCGTCAGTAAGAAATCTTTAGAATTAGAAATTGGAATCAAAATAAAACTTTTGTCTATGTTATTACATTCATTTTCCTTTAATTCTATTTGAAGATTATTCATGTATAAATTTTTTTATTCAATCTATTACCAATAGATTTTTTTGTTATGTACTTGTGATATTCTTATTCTAATAAATCCAATCCGCTGATGTTGAATTGTTGTTCGTGTTGAAATAAATCGAAATTAATAAGGAGTTGCTCAATGATCCTCGAACATGTACTTGTTTTGAGTGCCTATTTATTTTCTATCGGTATCTATGGATTGATCACGAGTCGAAATATGGTTAGAGCCCTTATGTGTCTTGAACTTATACTGAATGCAGTTAATATAAATTTTGTAACATTTTCTGATTTTTTTGATAGTCGCCAATTAAAAGGAAATATTTTCTCAATTTTTGTTATAGCTATCGCAGCTGCTGAAGCAGCTATTGGACTGGCTATTGTTTCGTCAATTTATCGTAACAGAAAATCAACCCGTATCAATCAATCGAATTTGTTGAATAAGTAGTATTCATCAGATAAAATAGAATATTCATCAATTCAAATCAGCAGCTATGATATGTAACGTATCTAATCATTTTACGAAAGAAAACGTAAAAAATTAAAGTATCTTGGTTCTATCTCATGAGTCGATCCACAATTGAATAGATATTTTTTGGTAAATCATTGAGTCATCTAGTACTTTAAATATATAATTCAAATTCCTTAAAAAAATTTCTAGATCGAGAATTCAAATTTATGATATTCAAAAAAATTCTAGATACAATGTCACATTCAGTAAAGATTTATGATACATGTATAGGGTGTACTCAATGTGTACGAGCCTGCCCCACCGATGTATTAGAAATGATACCTTGGGACGGATGTAAAGCAAAGCAAATTGCTTCTGCCCCAAGAACAGAAGACTGTGTCGGTTGTAAGAGATGTGAATCCGCCTGTCCAACGGATTTCTTGAGTGTTCGAGTTTATTTATGGCATGAAACCACCCGAAGTATGGGTCTAGCTTATTGATAATTTCCATAAAAAAACCACTTGAATACATTTGATTTTTTGTTTACCGACAAAAACCCGTAATCGAAAACATAATATATTTGTTATAATTTCGAATACGGGTTTTTCTGGTCCAAGTGTATCTTGCCTTTACCACGAATTCTTTTCCTTGGTTAACATTATTTGTAGTTTTACCGATATCCGCAGGTTCTTTAATTTTTTTTTTCCTCATCGAGGAAATAAGGTAATGAAATGGTATACTATATTTATATGTTTATCTGAACTTCTTTTAATGACCTATGCATTCTCTTATTATTTCGAATTGGATGATCCATTAATTCAATTAACAGAGGATTATAAATGGATCAATTTCTTTGATTTTTACTGGAGATTGGGAATAGATGGACTTTCTTTAGGGCCGACTTTACTGACAGGATTTATTACTACTTTAGCTACTTTAGCGGCTCGGCCAGTTACTCGGGATTCCCGATTATTCCATTTTCTGATGTTAGCAATGTATAGTGGTCAAATAGGATTATTTTCTTCTCAAGATCTTTTGCTTTTTTTCATCATGTGGGAGTTAGAATTAATTCCTGTTTATCTACTTCTATCGATATGGGGAGGGAAGAAACGTCTATATTCAGCTACAAAGTTTATTTTGTATACTGCAGGAAGTTCTGTCTTTTTATTAATGGGAGCTTTGGGTATTGCTTTATATGGTTCCAATGAACCAACATTTAATTTTGAAACATCAGCAAATCAATCATATCCTGTGTCTTTGGAAATAATATTCTATATTGGATTTCTTATTGCTTTTGCTGTCAAATCACCGATTATACCCTTCCATACATGGTTACCCGACACCCATGGGGAAGCACATTATAGTACTTGTATGCTTCTAGCCGGAATCCTATTAAAAATGGGAGCGTATGGGTTAGTTCGAATCAATATGCAATTATTACCTCATGCTCATTCTATATTTTCTCCCTGGTTGATAATAGTAGGCGCAATACAAATAATCTATGCAGCTTCAACATCTCCTGGTCAACGAAATTTAAAAAAAAGAATAGCCTATTCTTCTGTATCTCATATGGGTTTCATAATTATAGGAATTTGTTCTATAAGCGATATGGGACTTAATGGAGCCATTTTACAAATAATATCACATGGATTTATTGGCGCTGCCCTTTTTTTCTTGGCAGGAACGAGTTATGATAGAATACGTCTCGTTTATCTTGACGAAATGGGCGGAATGGCTAACCCAATGCCAAAAATATTCATGATGTTCAGTATCTTATCACTAGCCTCCCTTGCATTACCAAGCATGAGCGGTTTTTTTTCGGAATTGATAGTATTTCTTGGAATAATTACTGGTCAAAAATATTTTTTAATGCCAAAAATACTAATTACTTTTGGAATGGCAGTTGGAATGATATTAACTCCTATTTATTTATTATCTATGTTACGCCAAATATTCTATGGATACAAGCTTTTTAATGGCACATATTTTTCTTTTTTTGATTCTGGTCCACGAGAGCTCTTTGTTTTAATCTCTATCCTTTTGCCAATAATAGGTATTGGTATTTATCCGGATTTCGTTTTTTCATTGTCAGTCGACAAGGTTGAAGATATTTTATCTAATTATTTTTATAGGTAGTTTTTATAACTAATAACTATTTATAACTAATAACTAAAAAATAATAACTAAAAAAAAGAAAACAAAAAGCAATCCTATTATTTTTATTTTAAAAAATAAAAAAATAGAAAATTATTATGAAACTTTTTATATAATAAAAAAACTTCTTTTTTCTGCCCTTAAATTTAAGTTAAAAAAAAAATGCATTGTAACGGGATCCAGATATGTTTGGCATTTGTGAGAACTTTTTGAATCACTACAGGAGGTGATTCAAAAAGTTCTCAATGGCTTACCTGAAATTTCTTCTATATGCCGTCCTAGGGTTATATTCGCCAGACCCTTTACTTGAATTCAATTAGATGTTAATGTAAATGAACCATAACTATGTAGTCCTACTCCTAATAAATTAACCCCAAAATAACATATCCAAATTATAAGAAAGCCGATAGAGGCGACAATTGCGGAATGAAAACCTTCCCAATTTTTCTTTGTTCGAATATGTAAATAAATCGCGAATATAGTCCAAGTAATAAATGCCCAAGTTTCTTTTGGATCCCAATTCCAATACGATCCCCATGCTTCATTAGCCCAGACTGCGCCCGAAAGAATACCTATGGTTAAAAAAAGAAACCCTATACTAATAATACGATCACTCCAATAATCTAATTGTTGAATCAATTGAAATTTGTAATAATTCCTAGAAAAAAGAAAAGAAGTACTTTTTAAAACACTCCCTCTTTCCATCATGTATTGGATCTTACCGAAGGAAAATGAATCATTTACTAAATTATTCCTTTTATCAAAAAATCTTATGAATTTTCGAAATGTAATTACTAGAAGTGCTACTGATAATAACGATCCACATAAAAGAGCTACATAGCCCAATACCATCATACTTACGTGCATCATTAACCACTGAGATTGAAGAGCTGGTACTAAATTTTCGGATTGATGTGTGTCAGTTAAAAGACCCGAAGTAGCAAAGCCTTGGGCAAAAAAAGTACTTGGGGTGATTATTGCACTTAAATAATTTATATGTTTTTTAAAATTAAAATACGGAATCATATGAATAATGGAGAAACCCCAGGAAAGAAAGATTAATGATTCATATAAATCACTTAATGGTAAATGTCCCGAATAAATCCAACGAATGACTAATAATCCTGTTATACAGAAAAAAGTGGTTATCATGCCTTTTTCTGACGAATCATATAGTCCTACGAATTCATCGACTAATAAGGTTATCAAATGAATTGTAATTACAATTGAAACGACCGAAAAAGATATATGAGCTAATATATGTTCTAAAGTCGAAAATATCATAAAAATTCTTAAAAAGACGGGACTCAATTATATTATACGAAATTAAAAGCAGGAATTGAATTCATTATAGGACTTATTCTAACTTTTTGATTTGAAATTGAAAAATTTATGCCGCCACTCGGACTCGAACCGAGATGCTCTAGCACTGCTTCCTAAGAGCAGCGTGTCTACCGATTTCACCATAGCGGCTTGCTCAAAATCATAATAAACTATTTTTATTCAATCGTCGAGCTTGAAGGAGTCAATTCAATGTAATATTTTTATATTTTAGGACGGATAAAAATTCAAGATTAATGAATAAAAATTTGTAATTTTGAATCTTTCCATATTAATACTTATTATTATAATCTATTAATACTTATTATTATAATCCTTATTATCATTTAGTATGCTAATTTCAGTTACCCCAACCATGGTTTTTTGTATTGTAGTTTTTTATGGATTACAATTTCAACACTACATTCAAGGGGTTTATGGAAACATTTAATTCTATTAATCGTTTAATCCGTAAGGTTTCATTATTATTGTTTGTGTTAGAATTTAACAACCCAGTTAGGCATAGGTATTGATTTGGGTATATCATATAAAAAAGGGAACGGGTTCTGTCCCGTACTTCAAAAAATCTTGTCTATCTTGATCCATCTTCCAGCCCAAGCATATGATCTAAAATACATCATTCAAAATTTACATATTTTTATCTACCTCAATTTAAAAGAAAATCTACCTCAATTTAAAAGAAATTTTGATTTTATTAAGTATTTTTTTTTTCACTAGTATTTTAGTTTTATCATTTGACCAATTCTAACTTCTTGATTTGAATATGTGAATTATTTGGTAAAGATTCAGAATAATTAAGAATAGCAAATTTGATTTTAGTTTTGTATATCTTTATCTTTTTTTTCTTTATTTTATTAACATTTTATTGACTGAACCCTTTTTTTAACAAGAAATAAGAACCGATGAATGAGAAACAGGAAAAAATGAATTCAATTATTAATTAAACTAATACAATTTTTTTATGGAACATATACATCAATATTCATGGATCATACCGTTCCTTACACTTTCAGTCCCTATGTTAATAGGATGGGGACTCCTACTTTTTCCGGCAGCAACAAAAAAATTTCGTCGTATGTGGTCCTTTCCGAGTGTTTTATTGTTAAGTATAATTATGATTTTTTCGACCAATCTGTCTATTCAGCAAATAAATAGTTCTTTTATCTATCAATATGTATGGTCTTGGACCATCAATAATGATTTTTCCTTAGAGTTCGGACACTTGATCGACCCCCTTACTTCTATTTTGTCAATATTAATTACTACAGTTGGAGTTCTGGTTCTTATTTATAGTGATAATTATATGTTTCATGATCAAAGCTATTTGAGATTTTTTGCTTATATGAGTTTTTTCAATACTTCAATGTTGGGATTAGTTACTAGTTCTAATTTGATACAAATTTATATTTTTTGGGAATTGGTTGGAATGTGTTCTTATCTATTAATAGGCTTTTGGTTCACACGACCTATTGCGTCGAATGCTTGCCAAAAAGCATTTGTAACTAATCGTGTAGGGGATTTTGGTTTATTATTAGGAATTTTAGGTCTTTATTGGATAACAGGCAGTTTTGACTTTCGGGATTTATTCGAAATATTCAAAAACTTGATTTTTAACAATGAAGCTAATTTTTTATTTCTTACTTTGTGTGCTTTCCTATTATTTTCTGGTGCAATTGCTAAATCAGCCCAATTTCCTCTTCATGTATGGTTACCAGATGCCATGGAAGGACCCACTCCTATTTCGGCCTTAATCCATGCTGCTACTATGGTAGCGGCGGGTATTTTTCTTGTAACTCGACTTCTACCTCTTTTCGTACTCATACCCTACATAATGAATCTAATAGCTTTGATAGGTATAATAACAGTATTCTTAGGAGCGACTTTAGCACTTGCTCAAAGAGATATTAAGAGGAGTTTAGCCTATTCTACAATGTCTCAATTGGGTTATACAATGTTAGCTCTAGGTATGGGGTCGTATCGAGCTGCTTTATTTCATTTGATTACTCATGCTTATTCAAAAGCATTGTTATTTTTAGGAGCTGGATCCATTATTCATTTAATGGAAGCTATTGTTGGTTATTCCCCAGATAATAGTCAAAATATGGTTCTTATGGGTGGCTTAACAAAACATGTTCCGATTACAAAAACTGCTTTTTTATTAGGAACCCTCTCTCTTTGTGGTATTCCACCCCTTGCCTGTTTTTGGTCCAAAGATGAAATTCTTAATGATATTTGGTTGTATTCACTTAGTTTCGCAATAATAGCTTGGTTCACAGCAGGATTGACTGCCTTTTATATGTTTCGAGTCTATTTACTTACTTTTGAAGGGCATTTAAATGTTTCTTTTCAAAATTACAGTGGCAAAAAAAATAGCTCATTCTATGGAATATCTCTATGGGGTAAAGAAGCATCCAAAATGGTAAAAAAAAAAATTCGTTTATGTTTATTAAGTGTATTAACAATGAATGATGAAAGGGGTTTTTTTTTTCGGAAGAAGACATATCAAATTGATGGTAATGTAAGAAATATGACGCATCCTTTTATTACTATTAAATCTTTTGACAATAAAAGTACTTTTTCCTATCCTCACGAATCGGATAATACTATGTTATTCCCTATACTTGTTTTAGTACTATTTACTTTGTTTATTGGAGCTATAGGAATTTCTTTCAATCAATTCAATCAAGAAGGAATGGATTTGGCTATATTATCAAAATTGTTAACTCCCTTTTTGAATCAAAATCAAAAAAATTCTATGAATGTCTATGAATTTGTAACAAACGCAATTTTCTCAGTCAGTATAGCTTATTTTGGAATATTTATAGCATCATATTTATATAAGCCCATTTATTCATCGTTACAAAATTTTAACTTCCTTAATTCGCTTGCTAAAGAAGGTCCTAAGGGAATTCTTTGGGACAAAATAATAAATGTCATATACGATTGGTCCTATAATCGTGCTTACATAGATGATTTTTATGCAATATTTTTTACTGGAGGTATAAGAAAATTAACGCAATTAATTGAGTTTTTTGATAGACGACTAATTGATGGACTTACTAATGGAATCGGAGTTACAAGTTTCTTTGTAGGAGAAGGTATAAAATATATAGGAGGAGGTCGCATCTCATCTTATCTCTTGTTCTATTCATTTTATGTATTAATTTTTTTATTATTAGTAATTTACTTTTTTTTTTAGTAATTTACTACTTTTTTGATTACCATCTAAATCATAAGAATATAAAATTTCAAAAATTTGTCTATTTTTATAGTCTATCTCTTTTGTTTCGGAAGTTTTTTCTATTTCTACATCTGTTTCTTCCTCCCTTTCTTCCCTTTCTGAGGTTTCTTTCAGTTTCTTAGTCAAAATGGGTGACGGCATTCTGCCTAAAGAGTAGACACAGGTAATAAATAAGAGAATACTAAAGATTCGAGCCATAGAATTTATCAATTCTGATACAAGGTACTTATTAGATCGAATAAATACATTCGATTTAATAGAATGATTTTGCTGTATCCAGACTAATATCAATCCAACCCATTTCATGAATAAAATGTGACCAATTAACCAACCAACAAAACTACTTGTTACAAATAACATCTTGTTGTTGCATCGAAACATATAAATATTGACTAATCTGACTAACATTGAACTTGGTAAAATGAAATGGTTGAATAATTGAAAAATGAGATTATTCAGGAATACACATTGAATGCTAAGATTACGCATTGAATTTCTGGTAGTAGATCCATAATCAAAAAAGTGTTTGTGATTGTTCCAGAAGAAATGAAACAAAAGATACGGTAGAGCTAGGACAGTTATTGTATGAGGTCTACCCAATGCTAGATGCAGAGGCGCATAATAGATCGATATGAACATCATGAGCTGTCCCGTAATAAAACCTGTTGTTGCTGATACCTTCTTCTCGGTTCCTTCTTCTCCTTCTTCTCTAACCCGAGCTCGGAGAAGGAAGAGATAAGAGGGCCCCATGGAGAATGTGGTCAGAAATCCATAATAGAGTCCGACCATAACGACCGAATTGATTATCTTCATGCATAAGGATACTAGATTACCTAGTATAAAAGATTTCAAAATCATATCACAAACCCCCTTTTTCTTTTCTATTGCAATTTCTGGATTATTATATGATGATTTTGAAACTTTCCATATATATAGAAATAGCATATAGAAATAGAAACAGATAGACTAGAAACGACATCTCTTATGTCAATGACACCAAAGGGGATATTAAATGAATGGAATTGGGATATGGATGGAATATAATGAAATAGAGCCACTTTGAGGTTCCCTATGAAATGAGGCATGGAACAAAGACACTACGAAGAAGTTTCGGGAGTTACGAAGGAAACTTCGAGCTCATATTGGTCATGGGTTAAGAACGGGAATTGAACTCTACGAGATCTAATCTCCCGTTGTTCCTCAGTAGCTCAGTGGTAGAGCGGTCGGCTGTTAACTGACTGGTCGTAGGTTCGAATCCTACTTGGGGAGATTTGATTCATTCCGAATTAAAGAATTCGGAATGAAAGGGTTTGCTTTGACCGTTAAGAGTAGGTAACCCGTTCCCTGTGGCTTTCTTTCTATTGCATTCTATCTCATCATATCACATTCTGTTCTGCGATATTTGAGAATCACCGTCAATACCTCGGTGTAGATAAGTCCGGTATAATCCTTTGTTCCATAGTCTGGGGCTATTTACAACTAGCCAATTAAGAATTTTCAGATGTACTAGCAAGTGCATCAAAGATGCAGTCATCGATTCTGCCGAGAGGCCACAATTACCGCGAGCAAACATATTAATGACGACGAACACATTTTTGCTATGCTACCAATACTTGCTCTGCTATTCTGCCCAAGCCTGGCTGAGGAAGAGTTACGGGGCGTAAAACAAAAAAATATGCTGATTTGGTCCGACGGATTCCGGCATTAACGATATATATATCAAGAAGAAATAAGAAATAAAAAGAAGAAAAAGTGAGGCCATTCTATTTTGACACAAGACCTACACCCAAGTTCCATAGCCTTGGATCCGCTATCCCGATCATGATTTTCCTACCTCCAGAGGGAGGGGTCCTTCCCTTTTTGGCCGGTTGTGGGCGAGGAGGGATTCGAACCCCCGACACCGTGGTTCGTAGCCACGTGCTCTAATCCTCTGAGCTACAGGCCCCACCCTGTCTCCACTGGATCTGTTCCTGGGAGTACCCTAAAAAAGGAACCTTTCCTCTCCCCAGCCCTTTCGGGTTAAGAAGATGCGAAAGCGCCTCTCTCTCTATAAGAACGGTGCGTTCCGAGGTGTGAAGTGGGAGAGAAGAGATTTCATAATTGGGGTTTTGAATAAGATAAGACGACCTTTTCATTTTTTTTCATATTGAAAAAGTAATAAGAATGAGGGGTGTTAAGCTTTTTATCATCCTGGCGTCGAGCTATTTTTCCGCAGGACCTCCCCTACAGTATCTTCACCGCAGTAGAGTTTAACCACCAAGTTCGGGATGGATTGGTGTGGTTCCTCTACGCCTAGGACACCAGAATATCGAACTATGAACGAAGAAAGGCATGAGAGAAAAACATATTGGATAGTGATTGTGAGGCCCCAATTCTTGACTGGAGGGGACACCAAAGGCCTCCGCCCTTCCATCCCTTGGATCGATAGAGAGGGAGGGCAGAGCTTTTGGTTTTTTCATGTTGTCAAAGAGTTGAACAATAAAAATAGATGGCGAGTACCTGATCGAATTGATCGGGTCATGTAGGAACAAGGTTCAAGTCTACCGGTCTGTTAGGATGCCTCAGCTGCATACATCACTGCACTTCCACTTGACACCTATCGTAATGATAAACGGCTCGTCTCGCCGTGACCTTCTCTTGAATTCTCAAAACTTCTGTCGCTCCATCCTCGCAGGGGCAGAGAACCCGTCGCTGTCTCGGCTGTGCTACCGGAGGCTCTGGGGAAGTCGGAATAGGAGAGCACTCATCTTGGGGTGGGCTTACTACTTAGATGCTTTCAGCAGTTATCCGCTCCGCACTTGGCTACCCAGCGTTTACCGTGGGCACGATAACTGGTACACCAGAGGTGCGTCCTTCCCGGTCCTCTCGTACTAGGGAAAGGTCCTCTCAATGCTCTAACGCCCACACCGGATATGGACCGAACTGTCTCACGACGTTCTGAACCCAGCTCACGTACCGCTTTAATGGGCGAACAGCCCAACCCTTGGAACATACTACAGCCCCAGGTGGCGAAGAGCCGACATCGAGGTGCCAAACCTTCCCGTCGATGTGAGCTCTTGGGGAAGATCAGCCTGTTATCCCTAGAGTAACTTTTATCCGTTGAGCGACGGCCCTTCCACTCGGCACCGTCGGATCACTAAGGCCGACTTTCGTCCCTGCTCGACGGGTGGGTCTTGCAGTCAAGCTCCCTTCTGCCTTTGCACTCGAGGGCCAATCTCCGTCCGGCCCGAGGAAACCTTTGCACGCCTCCGTTACCTTTTGGGAGGCCTACGCCCCATAGAAACTGTCTACCTGAGACTGTCCCTTGGCCCGTAGGTCCTGACACAAGGTTAGAATTCTAGCTCTTCCAGAGTGGTATCTCACTGATGGCTCGGACCCCCCCGGAAGGGGGCCTTCTTCGCCTTCCACCTAAGCTGCGCAGGAAAGGCCCAAAGCCAATCCCAGGGAACAGTGAAGCTTCATAGGGTCTTTCTGTCCAGGTGCAGGTAGTCCGCATCTTCACAGACATGTCTATTTCACCGAGCCTCTCTCCGAGACAGTGCCCAGATCGTTACGCCTTTCGTGCGGGTCGGAACTTACCCGACAAGGAATTTCGCTACCTTAGGACCGTTATAGTTACGGCCGCCGTTCACCGGGGCTTCGGTCGCCGGCTCCCCTGTCATCAGGTCACCAACTTCCTTGACCTTCCGGCACTGGGCAGGCGTCAGCCCCCATACATGGTCTTACGACTTTGCGGAGACCTGTGTTTTTGGTAAACAGTCGCCCGGGCCTGGTCACTGCGACCCCCTTTGTGAGGAGGCACCCCTTCTCCCGAAGTTACGGGGCTATTTTGCCGAGTTCCTTAGAGAGAGTTGTCTCGCGCCCCTAGGTATTCTCTACCTACCCACCTGTGTCGGTTTCGGGTACAGGTACCCTTTTGTTGAAGGTCGTTCGAGCTTTTCCTGGGAGTATGGCATGGGTTACTTCAACGCCGTAGCGCCTGGTACTCGAACATTGGCTCGAGGCATTTTCTCTACCCCTTCTTACCCTGAAAAAGCAGGGACACCGTGCGTCCTTGAACCGATAACCATCTTTCGGCTAACCTAGCCTCCTCCGTCCCTCGGGACCAACAAGGGGTAGTACAGGAATATTCACCTGTTGTCCATCGACTACGCCTTTCGGCCTGATCTTAGGCCCTGACTCACCCTCCGTGGACGAACCTTGCGGAGGAACCCTTAGGTTTTCGGGGCATTGGATTCTCACCAATGTTTGCGTTACTCAAGCCGACATTCTCGCTTCCGCTTCGTCCACCCCTGCTCGCGCGGGTGCTTCCCTCTAAGGCGGAACGCTCCCCTACCGATGCATTTTTACATCCCACAGCTTCGGCAGATCGCTTAGCCCCGTTCATCTTCGGCGCAAGAGCGCTCGATCAGTGAGCTATTACGCACTCTTTCAAGGGTGGCTGCTTCTAGGCAAACCTCCTGGCTGTCTCTGCACCCCTACCTCCTTTATCACTGAGCGGTCATTTAGGGGCCTTAGCTGGTGATCCGGGCTGTTTCCCTCTCGACGATGAAGCTTATCCCCCATCGTCTCACTGGCCGACCTTGACCCCTGTTATTTTGAGGTCATATCTAGTATTCAGAGTTTGCCTCGATTTGGTACCGCTCTCGCGGCCCGCACCGAAACAGTGCTTTACCCCTAGATGTCCAGTCAACCGCTGCGCCTCAACGCATTTCGGGGAGAACCAGCTAGCTCTGGGTTCGAGTGGCATTTCACCCCTAACCACAACTCATCCGCTGATTCTTCAACATCAGTCGGTTCGGACCTCCACTTAGTTTCACCCAAGCTTCATCCTGGTCATGGATAGATCACCCAGGTTCGGGTCCATAAGCAGTGACAATTGCCCTATGAAGACTCGCTTTCGCTACGGCTCCGGTGGGTTCCCTTAACCAAGCCACTGCCTATGAGTCGCCGGCTCATTCTTCAACAGGCACGCGGTCAGAGCCCCGGGCTCCTCCCACTGCTTGGGAGCTTACGGTTTCATGTTCTATTTCACTCCCCGATGGGGGTTCTTTTCACCCTTCCCTCACGGTACTACTTCGCTATCGGTCACCCAGGAGTATTTAGCCTTGCAAGGTGGTCCTTGCTGATTCACACGGGATTCCACGTGCCCCATGCTACTCGGGTCAGAGCATAAGCTAATGATGCTTTCGGCTACTGGACTCTCGCCATCTAGGGTGCAGCACTCCACCGCTTCGCCTAGCAGCACGACGCTTGTATTGCTCTCCCACAACCCCGTTTTCACGGTTTAGGCTGCTCCCATTTCGCTCGCCGCTACTACGGGAATCGCTTTTGCTTTCTTTTCCTCTGGTTACTAAGATGTTTCAGTTCGCCAGGTTGTCTCTTGCCTGCCCATGGATTCAGCAGCAGTTTGAAAGGTTGACCTATTCGGGAATCTCCGGATCTACGCTTATTTTCAACTCCCCGAAGCATTTCGTCGCTTACTACGCCCTTCCTCGTCTCTGGGTGCCTAGGTATCCACCGTAAGCCTTTCCTCGTTTGAACCTCGCCCTTAACTTTAAGGCTATGCCATCCTAAGGTGCTGCTAAATGGAAGGATCTTATCAACGTCCATGAATGATAAATCATAGATCGAACTACCGAATCGGAAAAATTGGGTGCTATCATATAGCTTTGTACCGGCTAAGTTCACGAGTTGGAGATAAGCGGACTCGAACCGCTGACATCCGCCACAGGGTAAACCACCGCCTCTCGGGCCCCCCGACTGATTCTACCATAGAGGCCAACGATAAACAATAACTCCCCCCCGAACACAGCTTACAACTTTCATCGTACTGTGCTCTCCAAAGAGCAACTCTTCTCAAAATCTCAAAAGGTGCTGAGTTGGAATCCCATTCTAACTAAGGATTCTTGTGGTTCCGGAGGATCCAGCTACAGGAAACCCAGGAACGGAGAGCTTTCCCCCTTTCCGCCCCACTCTTTGGCTTAAGAATGCTGGTTTTAAGAATGAGTGATTGCCCTTCTCCGACCCTTACTGCCCAACCTGAGAGCGGACAGCTAATGCCTTCCACTTATTGAACAGGGTTCTATGGTCGGTCCGCGACCCCTGGATGCCGAAGGCGTCCTTGGGGTGATCTCGTAGTTCCTACGGGGTGGAGACGATGGGGTCGGTCCATGGATTTTCCTTCCTTTTGCCGCATTTCGCTAAAGGGTTGAAGGGGGATAGTGCATCAAGCTGTTCGCAAGGGCCAACTTGATCCTCTTCCCCAGGGATCCCAGATGAGGGAACCCTAGGAGAGCCGCCGACTCCAACTATCGTCCATGTACGATCCATACTAGATCTGACCAACTGCCCATCCTACCTCCTCTACGTTCTTGACAGCCCATCTTTGTCTCAGTAGAGTCTTTCAGTGGCATGTTTCGGTCCTCTTCCCCATTACTTAGAAAGAGTGAGCCACCGGTTCAGGTACAAGATACTATCATTACCGCCTGGACAATTAGACATCCAACCCGTAATCGCAACGACCCAATTGCAAGAGCGGAGCTCTACCAACTGAGCTATATCCCCCCGAGCCAAGTGGAGCATGCATGAAGGAGTCAGATGCTTCTTCTATTCTTTTCTTTGGCGCAGCTGGGCCATCCTGGACTTGAACCAGAGACCTCGCCCGTGAAGTAAATCATCGCACCTACGGTCCAACCAATTAGGAGAGAATCAATAGATTCCTTTTCGGGAGCGATTCATCCTTCCCGAACGCAGCATACAACTCTCCGTTGTACTGCGCTCTCCAAGTGTGCTTGTTCCCCCCTTCTTCCTTACCATGGCAAGTCTTTTTGAAATAACTCCGATGAGAAGAAAAAAGAAGGCGTTAAGAGACCCTCCTGGCCCCACCTTAGACACTCTAAGATCCTTTTTCAAACCTGCTCCCATTTCGAGCCAAGAGATAGACAAATAGACACATCCCATTGCACTGATCGGAGGCGTTCGTAGTGACTGAGGGGGTCGAAGACCAAGAAGTGAGTTATTTATCAGCCAAGCCTTCTTCTTACGGCTAGATCCAATCTCCTGGTCCCTGCGGAAAGGAAAAAGAATTTCACGTTCTTCCTTTCGGGAAGGGAGGGTTAGGAAAATCCTATTGATTGCAGCTTTCTCCAGACCTCCGGGAAAAGCATGAAAAAAAAAGGCTCGAATGGTACGATCCCTCCGTCGCCCCAGAATGAAAGGGGCGATCTCGTAGTTCTTGGTCTGTGAAGATACGTTGTTAGGTGCTCCATTTTATTTTCCCATTGAGGCCGAACCTAAACCTGTGCTCGAGAGATAGCTGTCCATACACTGATAAGGGATGTATGGATTCTCGAGAAGAGAGGAGCCATGGTGGTCCCCCCCGGACCGCCCGGATCCCACGAGTGAATAGAAAGTTGGATCTACATTGGATCTCACCCGAATCGCCCCATCTATCCTCCTGAGGAGAAGTTTGGTTTCAAACCCCGGTTCGAACAGGAGAAGTACGCCATGCTAATGTGCCTTGGATGATCCACATCTCAGGGTCAGGCGCTGATGAGCACATTGAACTATCCATGTGGCTGAGAGCCCTCACAGCCCAGGCACAACGACGCAATTATCAGGGGCGCGCTCTACCACTGAGCTAATAGCCCGTCGTGCGGGCCTCTCGCCGGGGGCCCGCTATGCCAAAAGCGAGAGAAACCCCATCCCTCTCTTTCCTTTTTTCGCCCCCATGTCCCTCCCGCGTGGCGACATGGGGGCGAAAAAAAGGGGGATCCTATCAACTTGTTCCGACCTAGGATAATAAGCTCATGAGCTTGGTCTTACTTCACCGTCGAGAAACGAAAGAAGACTTCCGTCGACAAGTTTAACTCATACGTAGCTCCCTTCTTTTGGGGTGTGAAGCAGTGTCAAACCAAAATACCCAACAAGCATTACCTCTCCCTGAAAAGGAGGTGATCCAGCCGCACCTTCCAGTACGGCTACCTTGTTACGACTTCACTCCAGTCACTAGCCCTGCCTTCGGCATCCCCCTCCTTGCGGTTAAGGTAACGACTTCGGGCATGGCCAGCTCCCATAGTGTGACGGGCGGTGTGTACAAGGCCCGGGAACGAATTCACCGCCGTATGGCTGACCGGCGATTACTAGCGATTCCGGCTTCATGCAGGCGAGTTGCAGCCTGCAATCCGAACTGAGGACGGGTTTTTGGAGTTAGCTCACCCTCGCGGGATCGCGACCCTTTGTCCCGGCCATTGTAGCACGTGTGTCGCCCAGGGCATAAGGGGCATGATGACTTGACGTCATCCTCACCTTCCTCCGGCTTATCACCGGCAGTCTGTTCAGGGTTCCAAACTCAACGGTGGCAACTAAACACGAGGGTTGCGCTCGTTGCGGGACTTAACCCAACACCTTACGGCACGAGCTGACGACAGCCATGCACCACCTGTGTCCGCGTTCCCGAAGGCACCCCTCTCTTTCAAGAGGATTCGCGGCATGTCAAGCCCTGGTAAGGTTCTTCGCTTTGCATCGAATTAAACCACATGCTCCACCGCTTGTGCGGGCCCCCGTCAATTCCTTTGAGTTTCATTCTTGCGAACGTACTCCCCAGGCGGGATACTTAACGCGTTAGCTACAGCACTGCACGGGTCGATACGCACAGCGCCCAGTATCCATCGTTTACGGCTAGGACTACTGGGGTATCTAATCCCATTCGCTCCCCTAGCTTTCGTCTCTCAGTGTCAGTGTCGGCCCAGCAGAGTGCTTTCGCCGTTGGTGTTCTTTCCGATCTCTACGCATTTCACCGCTCCACCGGAAATTCCCTCTGCCCCTACCGTACTCCAGCTTGGCAGTTTCCACCGCCTGTCCAGGGTTGAGCCCTGGGATTTGACGGCGGACTTAAAAAGCCACCTACAGACGCTTTACGCCCAATCATTCCGGATAACGCTTGCATCCTCTGTATTACCGCGGCTGCTGGCACAGAGTTAGCCGATGCTTATTCCCCAGATACCGTCATTGCTTCTTCTCCGGGAAAAGAAGTTCACGACCCGTAGGCCTTCTACCTCCACGCGGCATTGCTCCGTCAGGCTTTCGCCCATTGCGGAAAATTCCCCACTGCTGCCTCCCGTAGGAGTCTGGGCCGTGTCTCAGTCCCAGTGTGGCTGATCATCCTCTCGGACCAGCTACTGATCATCGCCTTGGTAAGCTATTGCCTCACCAACTAGCTAATCAGACGCGAGCCCCTCCTCGGGCGGATTCCTCCTTTTGCTCCTCAGCCTACGGGGTATTAGCAGCCGTTTCCAGCTGTTGTTCCCCTCCCAAGGGCAGGTTCTTACGCGTTACTCACCCGTCCGCCACTGGAAACACCACTTCCCGTCCGACTTGCATGTGTTAAGCATGCCGCCAGCGTTCATCCTGAGCCAGGATCGAACTCTCCATGAGATTCTTAGTTGCATTACTTATAGCTTCCTTATTCGTAGACAAAGCTGATTCGGAACTGTCTTTCATTTCAAGGCATAACTTGTATCCATGCGCTTCATATTCGCTTAGAGTTCGCTCCAAGAAATATAGCCGTCCCTACCCCCTCACGTCAATCCCACGAGCCTCTTATCCATTCGATCACGACGGCGGGGGAGCAAGTCAAAATAGAAAAACTCACATTGGGTTTAGGGATAATCAGGCTCGAACTGATGACTTCCACCACGTCAAGGTGACACTCTACCGCTGAGTTATATCCCTTCCCTTGCCCCCATCGAGAAATAGAACTGACTAATCCGAAGGCAAAGGGTCGAGAAACTCAACGCCACTACTTTTGAACAACTTGGAGTCGGTCCTTCTTTTCGCACCATTACGGATACGAAAATAATGGGAAAAATTGGATTCAATTGTCAACTGCTCCTATCGGAAATAGGATTGACTACGGATTCGAGCCATAGCACATGGTTTCATAAAAGCGTATGATTTTCCCGATCTAAATAAAGCAGGTTTTACATGAAGAAGATTTGGCTCAGCATGTTCTATTCGATACGGGTAGGAGAAGACCCCGACTCGGTATTCTTAAAAAAATAGAGAAATCAGAACCAAGTCAAGATGATACGGATCAACCCCTTCTTCTTGCGCCAAAGATCTTACTATTTCCGAAGGAACTGGAGTTCCATCTCTTTTCCATTCAAGAGTTCTTATGTGTTTCCACGCCCCTTTGAGACCCCGAAAAATGGACAAATTCCTTTTCTTAGGAACACATACAAGATTCGTCACTACAAAAAGGATAATGGTAACCCCACCATTAACTATTTCATTTATTAACTACTTCATTTATGAATTTCATAGTAATAGAAATAAAATACATATATATCCTACCGAGACAGAATTTGTAACTTGCTATCCTCTTGCCTAGCAGGCAAAGATTTACCTCCGTGGAAAGGATGATTCATTCGGATCGACATGAGAGTCCAACTACATTGCATTGCTAGAATCCATGTTGTATATTTGAAAGAGGTTGACCTCCTTGCTTCTCTCATGGTACAATCCTCTTCTCGCTAAGCCCCTTTCTCCTCGGTCCACAGAGACAAAATGTAGGACTGGTGCCAACAGTTCATCACAAAGGACTCACTGAGCCAGGATCACTAACTAATACTAATCTATTACTAATAGAAAATACTAATACTAATATAATAGATAGAATAGAAAAGAACTGTCTTTTCTTTATACTTTCGCCGGTTCCGTTGCTACCGCGTGCTTTACGCAATCGATCGGATCATATAGATATCCCTTCAACACAACATAGGTCGTCGAAAGGATCTCGGAGACCCACCAAAGCACGAAAGCCAGGATCTTTCAGAAAAAGGATTCCTATTCGAAGAGTGCATAACCGCATGGATAAGCTCACACTAACCCGTCAATTTGGGATCCAATTCGGGATTTTCCTTGGGAGGTGTCGGGAAGGAATTGGAATGTAATAATATCGATTCATACAGATATAGAAGAATCTCTATTGATTCAAAGGCTGTACCTATAGGCCTATAGGATAGGGCTAGCGAAAGAGGAAAAAACCGAAGATTTCACATAGTACTTTTGATCGAAAAATCAATCTGATTTATTTCGTACCCTTCGCTCAGTGAGAAAATGGGTCAGATTCTACAGGATCAAACCTATGGGACTTAAGGAATGACGGAAGGGAATAAAAAAGAAATAAATAAAAATGAAGTAGAAGAGCCCAGATTCCAAATGAACAAATTCAAACTTGAAAAAAATCTTTCTGATTCTCGAAGAATGAGGGGCAAAGGGATTGATCGAGAAAGATCTCTTGTTCTTATTATAAGATCGTGATTGGATCCACATATGTTTGGTAAAAAGAAGAATCTTCTCCTTTGAGAATAATCAAAAAAAGAAAGTGTTCAATTGGAACATGAAAACGTGACTAAATTTGTCCTAGTTACTCTTGGGGACGGAGTGGATGAAGGGAGGAGCTTCTCGAACGAGGAAAGGGATCCAATGACTTCGAAAGAATTGAACGAGGAGCCGTATGAGGTGAAAATCTCATGTACGGTTCTGTAGAGTGGCAGTAAGGATGACTTATCTGTCAACTTTTC
