# Supplementary material for: Resolving Recalcitrant Clades in the Pantropical Ochnaceae: Insights From Comparative Phylogenomics of Plastome and Nuclear Genomic Data Derived From Targeted Sequencing
Source: Front Plant Sci. 2021 Feb 4;12:638650. doi: 10.3389/fpls.2021.638650 (PMC7890083; doi:10.3389/fpls.2021.638650)
Supplement: Supplementary Data 1 — Annotated de novo reference contig (Ouratea bahiensis) before and after removal of the inverted repeat (in different file formats). [file Data_Sheet_1.ZIP › size138408_GeSeqEdit100891.gb]

LOCUS       size138408_GeSeq      100891 bp    DNA     linear   UNA 20-MAY-2020
DEFINITION  .
ACCESSION   urn.local...l-bxz2g49
VERSION     urn.local...l-bxz2g49
KEYWORDS    .
SOURCE      
  ORGANISM  .
FEATURES             Location/Qualifiers
     source          1..>100891
     exon            order(944..1177,complement(59754..59987))
                     /gene="rps12"
                     /standard_name="exon"
     gene            join(complement(59197..59987),complement(30581..30694),
                     complement(30581..30694),complement(30581..30694),
                     complement(944..1734))
                     /gene="rps12"
                     /Note="blatX_hit_rps12-fragment_NC_036341.1,_position_1_-_
                     114,_psl_score_94.8,_coverage_30.65%,_match_29.03%,_fragme
                     nt_match_94.74%%_blatX_hit_rps12_NC_036341.1,_position_114
                     _-_372,_psl_score_88.9,_coverage_69.62%,_match_67.20%"
                     /standard_name="gene"
     CDS             join(complement(59754..59987),complement(59197..59221),
                     complement(30581..30694),complement(30581..30694),
                     complement(30581..30694),complement(1710..1734),
                     complement(944..1177))
                     /gene="rps12"
                     /codon_start=1
                     /standard_name="CDS"
     intron          1178..1709
                     /gene="rps12"
                     /standard_name="intron"
     exon            order(1710..1734,complement(59197..59221))
                     /gene="rps12"
                     /standard_name="exon"
     CDS             1793..2260
                     /codon_start=2
                     /gene="rps7"
                     /standard_name="CDS"
     gene            1793..2260
                     /gene="rps7"
                     /Note="blatX_hit_rps7_NC_036341.1,_position_1_-_468,_psl_s
                     core_98.8,_coverage_100.00%,_match_98.72%"
                     /standard_name="gene"
     gene            2577..4792
                     /gene="ndhB"
                     /Note="blatX_hit_ndhB_NC_036341.1,_position_1_-_1533,_psl_
                     score_97.3,_coverage_100.00%,_match_98.63%"
                     /standard_name="gene"
     CDS             join(2577..3353,4037..4792)
                     /codon_start=2
                     /gene="ndhB"
                     /standard_name="CDS"
     exon            2577..3353
                     /gene="ndhB"
                     /standard_name="exon"
     intron          3354..4036
                     /gene="ndhB"
                     /standard_name="intron"
     exon            4037..4792
                     /gene="ndhB"
                     /standard_name="exon"
     gene            5401..5481
                     /gene="trnL-CAA"
                     /Note="blatN_hit_trnL-CAA_NC_036341.1,_position_1_-_81,_ps
                     l_score_100.0,_coverage_100.00%,_match_100.00%"
                     /standard_name="gene"
     tRNA            5401..5481
                     /gene="trnL-CAA"
                     /standard_name="tRNA"
     CDS             complement(6442..10046)
                     /codon_start=2
                     /gene="ycf2-fragment"
                     /standard_name="CDS"
     gene            complement(6442..10046)
                     /gene="ycf2-fragment"
                     /Note="blatX_hit_ycf2-fragment_NC_036341.1,_position_3211_
                     -_6875,_psl_score_96.6,_coverage_52.27%,_match_50.41%,_fra
                     gment_match_94.87%"
                     /standard_name="gene"
     exon            complement(12019..12055)
                     /gene="trnV-UAC"
                     /standard_name="exon"
     tRNA            join(complement(12649..12685),complement(12019..12055))
                     /gene="trnV-UAC"
                     /standard_name="tRNA"
     gene            complement(12019..12685)
                     /gene="trnV-UAC"
                     /Note="blatN_hit_trnV-UAC_NC_036341.1,_position_1_-_74,_ps
                     l_score_71.7,_coverage_100.00%,_match_98.65%"
                     /standard_name="gene"
     intron          complement(12056..12648)
                     /gene="trnV-UAC"
                     /standard_name="intron"
     exon            complement(12649..12685)
                     /gene="trnV-UAC"
                     /standard_name="exon"
     gene            12858..12930
                     /gene="trnM-CAU"
                     /Note="blatN_hit_trnM-CAU_NC_036341.1,_position_1_-_73,_ps
                     l_score_97.3,_coverage_100.00%,_match_97.26%"
                     /standard_name="gene"
     tRNA            12858..12930
                     /gene="trnM-CAU"
                     /standard_name="tRNA"
     CDS             complement(13186..13584)
                     /codon_start=2
                     /gene="atpE"
                     /standard_name="CDS"
     gene            complement(13186..13584)
                     /gene="atpE"
                     /Note="blatX_hit_atpE_NC_036341.1,_position_1_-_399,_psl_s
                     core_92.5,_coverage_97.79%,_match_90.44%"
                     /standard_name="gene"
     CDS             complement(13581..15077)
                     /codon_start=2
                     /gene="atpB"
                     /standard_name="CDS"
     gene            complement(13581..15077)
                     /gene="atpB"
                     /Note="blatX_hit_atpB_NC_036341.1,_position_1_-_1497,_psl_
                     score_93.5,_coverage_100.00%,_match_93.45%"
                     /standard_name="gene"
     gene            15860..17279
                     /gene="rbcL"
                     /Note="blatX_hit_rbcL_NC_036341.1,_position_1_-_1420,_psl_
                     score_93.4,_coverage_98.82%,_match_92.21%"
                     /standard_name="gene"
     CDS             15860..17279
                     /codon_start=2
                     /gene="rbcL"
                     /standard_name="CDS"
     CDS             18162..19669
                     /codon_start=2
                     /gene="accD"
                     /standard_name="CDS"
     gene            18162..19669
                     /gene="accD"
                     /Note="blatX_hit_accD_NC_036341.1,_position_1_-_1505,_psl_
                     score_86.8,_coverage_100.13%,_match_82.47%"
                     /standard_name="gene"
     CDS             20444..20557
                     /codon_start=2
                     /gene="psaI"
                     /standard_name="CDS"
     gene            20444..20557
                     /gene="psaI"
                     /Note="blatX_hit_psaI_NC_036341.1,_position_1_-_114,_psl_s
                     core_94.8,_coverage_100.00%,_match_94.74%"
                     /standard_name="gene"
     gene            20995..21549
                     /gene="ycf4"
                     /Note="blatX_hit_ycf4_NC_036341.1,_position_1_-_555,_psl_s
                     core_91.6,_coverage_100.00%,_match_91.53%"
                     /standard_name="gene"
     CDS             20995..21549
                     /codon_start=2
                     /gene="ycf4"
                     /standard_name="CDS"
     CDS             22128..22811
                     /codon_start=2
                     /gene="cemA"
                     /standard_name="CDS"
     gene            22128..22811
                     /gene="cemA"
                     /Note="blatX_hit_cemA_NC_036341.1,_position_7_-_690,_psl_s
                     core_90.5,_coverage_99.13%,_match_89.71%"
                     /standard_name="gene"
     CDS             23046..24008
                     /codon_start=2
                     /gene="petA"
                     /standard_name="CDS"
     gene            23046..24008
                     /gene="petA"
                     /Note="blatX_hit_petA_NC_036341.1,_position_1_-_963,_psl_s
                     core_91.2,_coverage_100.00%,_match_91.17%"
                     /standard_name="gene"
     CDS             complement(24962..25084)
                     /codon_start=2
                     /gene="psbJ"
                     /standard_name="CDS"
     gene            complement(24962..25084)
                     /gene="psbJ"
                     /Note="blatX_hit_psbJ_NC_036341.1,_position_1_-_123,_psl_s
                     core_96.8,_coverage_100.00%,_match_96.75%"
                     /standard_name="gene"
     CDS             complement(25227..25343)
                     /codon_start=2
                     /gene="psbL"
                     /standard_name="CDS"
     gene            complement(25227..25343)
                     /gene="psbL"
                     /Note="blatX_hit_psbL_NC_036341.1,_position_1_-_117,_psl_s
                     core_95.8,_coverage_100.00%,_match_95.73%"
                     /standard_name="gene"
     CDS             complement(25370..25489)
                     /codon_start=2
                     /gene="psbF"
                     /standard_name="CDS"
     gene            complement(25370..25489)
                     /gene="psbF"
                     /Note="blatX_hit_psbF_NC_036341.1,_position_1_-_120,_psl_s
                     core_94.2,_coverage_100.00%,_match_94.17%"
                     /standard_name="gene"
     CDS             complement(25499..25750)
                     /codon_start=2
                     /gene="psbE"
                     /standard_name="CDS"
     gene            complement(25499..25750)
                     /gene="psbE"
                     /Note="blatX_hit_psbE_NC_036341.1,_position_1_-_252,_psl_s
                     core_95.7,_coverage_100.00%,_match_95.63%"
                     /standard_name="gene"
     CDS             26596..26685
                     /codon_start=2
                     /gene="petL"
                     /standard_name="CDS"
     gene            26596..26685
                     /gene="petL"
                     /Note="blatX_hit_petL_NC_036341.1,_position_13_-_102,_psl_
                     score_88.9,_coverage_88.24%,_match_78.43%"
                     /standard_name="gene"
     CDS             26844..26957
                     /codon_start=2
                     /gene="petG"
                     /standard_name="CDS"
     gene            26844..26957
                     /gene="petG"
                     /Note="blatX_hit_petG_NC_036341.1,_position_1_-_114,_psl_s
                     core_96.5,_coverage_100.00%,_match_96.49%"
                     /standard_name="gene"
     tRNA            complement(27067..27140)
                     /gene="trnW-CCA"
                     /standard_name="tRNA"
     gene            complement(27067..27140)
                     /gene="trnW-CCA"
                     /Note="blatN_hit_trnW-CCA_NC_036341.1,_position_1_-_74,_ps
                     l_score_96.0,_coverage_100.00%,_match_95.95%"
                     /standard_name="gene"
     tRNA            complement(27338..27411)
                     /gene="trnP-UGG"
                     /standard_name="tRNA"
     gene            complement(27338..27411)
                     /gene="trnP-UGG"
                     /Note="blatN_hit_trnP-UGG_NC_036341.1,_position_1_-_74,_ps
                     l_score_100.0,_coverage_100.00%,_match_100.00%"
                     /standard_name="gene"
     CDS             27777..27911
                     /codon_start=2
                     /gene="psaJ"
                     /standard_name="CDS"
     gene            27777..27911
                     /gene="psaJ"
                     /Note="blatX_hit_psaJ_NC_036341.1,_position_1_-_135,_psl_s
                     core_94.9,_coverage_100.00%,_match_94.81%"
                     /standard_name="gene"
     CDS             28405..28604
                     /codon_start=2
                     /gene="rpl33"
                     /standard_name="CDS"
     gene            28405..28604
                     /gene="rpl33"
                     /Note="blatX_hit_rpl33_NC_036341.1,_position_2_-_201,_psl_
                     score_88.0,_coverage_99.50%,_match_87.56%"
                     /standard_name="gene"
     CDS             28801..29106
                     /codon_start=2
                     /gene="rps18"
                     /standard_name="CDS"
     gene            28801..29106
                     /gene="rps18"
                     /Note="blatX_hit_rps18_NC_036341.1,_position_1_-_306,_psl_
                     score_94.5,_coverage_100.00%,_match_94.44%"
                     /standard_name="gene"
     CDS             complement(29410..29754)
                     /codon_start=2
                     /gene="rpl20"
                     /standard_name="CDS"
     gene            complement(29410..29754)
                     /gene="rpl20"
                     /Note="blatX_hit_rpl20_NC_036341.1,_position_1_-_345,_psl_
                     score_88.2,_coverage_97.46%,_match_85.88%"
                     /standard_name="gene"
     exon            complement(30581..30694)
                     /gene="rps12"
                     /standard_name="exon"
     exon            complement(30862..31089)
                     /gene="clpP"
                     /standard_name="exon"
     gene            complement(30862..32886)
                     /gene="clpP"
                     /Note="blatX_hit_clpP_NC_036341.1,_position_1_-_588,_psl_s
                     core_89.0,_coverage_100.00%,_match_93.03%"
                     /standard_name="gene"
     CDS             join(complement(32818..32886),complement(31679..31969),
                     complement(30862..31089))
                     /gene="clpP"
                     /codon_start=2
                     /standard_name="CDS"
     intron          complement(31090..31678)
                     /gene="clpP"
                     /standard_name="intron"
     exon            complement(31679..31969)
                     /gene="clpP"
                     /standard_name="exon"
     intron          complement(31970..32817)
                     /gene="clpP"
                     /standard_name="intron"
     exon            complement(32818..32886)
                     /gene="clpP"
                     /standard_name="exon"
     CDS             33330..34856
                     /codon_start=2
                     /gene="psbB"
                     /standard_name="CDS"
     gene            33330..34856
                     /gene="psbB"
                     /Note="blatX_hit_psbB_NC_036341.1,_position_1_-_1527,_psl_
                     score_93.4,_coverage_100.00%,_match_93.32%"
                     /standard_name="gene"
     gene            35011..35118
                     /gene="psbT"
                     /Note="blatX_hit_psbT_NC_036341.1,_position_1_-_108,_psl_s
                     core_98.2,_coverage_100.00%,_match_98.15%"
                     /standard_name="gene"
     CDS             35011..35118
                     /codon_start=2
                     /gene="psbT"
                     /standard_name="CDS"
     CDS             complement(35179..35310)
                     /codon_start=2
                     /gene="pbf1"
                     /standard_name="CDS"
     gene            complement(35179..35310)
                     /gene="pbf1"
                     /Note="blatX_hit_pbf1_NC_036341.1,_position_1_-_132,_psl_s
                     core_93.2,_coverage_100.00%,_match_93.18%"
                     /standard_name="gene"
     CDS             35415..35636
                     /codon_start=2
                     /gene="psbH"
                     /standard_name="CDS"
     gene            35415..35636
                     /gene="psbH"
                     /Note="blatX_hit_psbH_NC_036341.1,_position_1_-_222,_psl_s
                     core_93.7,_coverage_100.00%,_match_93.69%"
                     /standard_name="gene"
     CDS             36590..37235
                     /codon_start=2
                     /gene="petB"
                     /standard_name="CDS"
     gene            36590..37235
                     /gene="petB"
                     /Note="blatX_hit_petB_NC_036341.1,_position_3_-_648,_psl_s
                     core_93.9,_coverage_99.69%,_match_93.52%"
                     /standard_name="gene"
     CDS             38248..38743
                     /codon_start=2
                     /gene="petD"
                     /standard_name="CDS"
     gene            38248..38743
                     /gene="petD"
                     /Note="blatX_hit_petD_NC_036341.1,_position_5_-_500,_psl_s
                     core_93.0,_coverage_99.00%,_match_92.02%"
                     /standard_name="gene"
     CDS             complement(38847..39878)
                     /codon_start=2
                     /gene="rpoA"
                     /standard_name="CDS"
     gene            complement(38847..39878)
                     /gene="rpoA"
                     /Note="blatX_hit_rpoA_NC_036341.1,_position_1_-_1020,_psl_
                     score_87.2,_coverage_101.18%,_match_87.94%"
                     /standard_name="gene"
     CDS             complement(39953..40369)
                     /codon_start=2
                     /gene="rps11"
                     /standard_name="CDS"
     gene            complement(39953..40369)
                     /gene="rps11"
                     /Note="blatX_hit_rps11_NC_036341.1,_position_1_-_417,_psl_
                     score_85.9,_coverage_100.00%,_match_85.85%"
                     /standard_name="gene"
     gene            complement(40489..40602)
                     /gene="rpl36"
                     /Note="blatX_hit_rpl36_NC_036341.1,_position_1_-_114,_psl_
                     score_88.6,_coverage_100.00%,_match_88.60%"
                     /standard_name="gene"
     CDS             complement(40489..40602)
                     /codon_start=2
                     /gene="rpl36"
                     /standard_name="CDS"
     CDS             complement(41092..41496)
                     /codon_start=2
                     /gene="rps8"
                     /standard_name="CDS"
     gene            complement(41092..41496)
                     /gene="rps8"
                     /Note="blatX_hit_rps8_NC_036341.1,_position_1_-_405,_psl_s
                     core_88.9,_coverage_100.00%,_match_88.89%"
                     /standard_name="gene"
     CDS             complement(41735..42103)
                     /codon_start=2
                     /gene="rpl14"
                     /standard_name="CDS"
     gene            complement(41735..42103)
                     /gene="rpl14"
                     /Note="blatX_hit_rpl14_NC_036341.1,_position_1_-_369,_psl_
                     score_88.9,_coverage_100.00%,_match_88.89%"
                     /standard_name="gene"
     CDS             complement(42227..42629)
                     /codon_start=2
                     /gene="rpl16"
                     /standard_name="CDS"
     gene            complement(42227..42629)
                     /gene="rpl16"
                     /Note="blatX_hit_rpl16_NC_036341.1,_position_6_-_408,_psl_
                     score_90.6,_coverage_98.77%,_match_89.46%"
                     /standard_name="gene"
     gene            complement(43961..44623)
                     /gene="rps3"
                     /Note="blatX_hit_rps3_NC_036341.1,_position_1_-_657,_psl_s
                     core_86.7,_coverage_100.91%,_match_87.67%"
                     /standard_name="gene"
     CDS             complement(43961..44623)
                     /codon_start=2
                     /gene="rps3"
                     /standard_name="CDS"
     gene            complement(44753..45094)
                     /gene="rpl22"
                     /Note="blatX_hit_rpl22_NC_036341.1,_position_24_-_365,_psl
                     _score_83.7,_coverage_87.02%,_match_72.77%"
                     /standard_name="gene"
     CDS             complement(44753..45094)
                     /codon_start=2
                     /gene="rpl22"
                     /standard_name="CDS"
     CDS             complement(45280..45498)
                     /codon_start=2
                     /gene="rps19"
                     /standard_name="CDS"
     gene            complement(45280..45498)
                     /gene="rps19"
                     /Note="blatX_hit_rps19_NC_036341.1,_position_1_-_219,_psl_
                     score_92.3,_coverage_96.05%,_match_88.60%"
                     /standard_name="gene"
     exon            complement(45559..45991)
                     /gene="rpl2"
                     /standard_name="exon"
     CDS             join(complement(46660..47050),complement(45559..45991))
                     /gene="rpl2"
                     /codon_start=2
                     /standard_name="CDS"
     gene            complement(45559..47050)
                     /gene="rpl2"
                     /Note="blatX_hit_rpl2_NC_036341.1,_position_1_-_833,_psl_s
                     core_94.6,_coverage_98.80%,_match_95.80%"
                     /standard_name="gene"
     intron          complement(45992..46659)
                     /gene="rpl2"
                     /standard_name="intron"
     exon            complement(46660..47050)
                     /gene="rpl2"
                     /standard_name="exon"
     gene            complement(47069..47350)
                     /gene="rpl23"
                     /Note="blatX_hit_rpl23_NC_036341.1,_position_1_-_282,_psl_
                     score_99.0,_coverage_100.00%,_match_98.94%"
                     /standard_name="gene"
     CDS             complement(47069..47350)
                     /codon_start=2
                     /gene="rpl23"
                     /standard_name="CDS"
     tRNA            complement(47516..47589)
                     /gene="trnI-CAU"
                     /standard_name="tRNA"
     gene            complement(47516..47589)
                     /gene="trnI-CAU"
                     /Note="blatN_hit_trnI-CAU_NC_036341.1,_position_1_-_74,_ps
                     l_score_100.0,_coverage_100.00%,_match_100.00%"
                     /standard_name="gene"
     gene            47678..54489
                     /gene="ycf2"
                     /Note="blatX_hit_ycf2_NC_036341.1,_position_1_-_6875,_psl_
                     score_96.4,_coverage_98.77%,_match_94.81%"
                     /standard_name="gene"
     CDS             47678..54489
                     /codon_start=2
                     /gene="ycf2"
                     /standard_name="CDS"
     gene            complement(55450..55530)
                     /gene="trnL-CAA"
                     /Note="blatN_hit_trnL-CAA_NC_036341.1,_position_1_-_81,_ps
                     l_score_100.0,_coverage_100.00%,_match_100.00%"
                     /standard_name="gene"
     tRNA            complement(55450..55530)
                     /gene="trnL-CAA"
                     /standard_name="tRNA"
     exon            complement(56139..56894)
                     /gene="ndhB"
                     /standard_name="exon"
     CDS             join(complement(57578..58354),complement(56139..56894))
                     /gene="ndhB"
                     /codon_start=2
                     /standard_name="CDS"
     gene            complement(56139..58354)
                     /gene="ndhB"
                     /Note="blatX_hit_ndhB_NC_036341.1,_position_1_-_1533,_psl_
                     score_97.3,_coverage_100.00%,_match_98.63%"
                     /standard_name="gene"
     intron          complement(56895..57577)
                     /gene="ndhB"
                     /standard_name="intron"
     exon            complement(57578..58354)
                     /gene="ndhB"
                     /standard_name="exon"
     CDS             complement(58671..59138)
                     /codon_start=2
                     /gene="rps7"
                     /standard_name="CDS"
     gene            complement(58671..59138)
                     /gene="rps7"
                     /Note="blatX_hit_rps7_NC_036341.1,_position_1_-_468,_psl_s
                     core_98.8,_coverage_100.00%,_match_98.72%"
                     /standard_name="gene"
     intron          complement(59222..59753)
                     /gene="rps12"
                     /standard_name="intron"
     tRNA            61841..61912
                     /gene="trnV-GAC"
                     /standard_name="tRNA"
     gene            61841..61912
                     /gene="trnV-GAC"
                     /Note="blatN_hit_trnV-GAC_NC_036341.1,_position_1_-_72,_ps
                     l_score_100.0,_coverage_100.00%,_match_100.00%"
                     /standard_name="gene"
     rRNA            62137..63627
                     /gene="rrn16"
                     /standard_name="rRNA"
     gene            62137..63627
                     /gene="rrn16"
                     /Note="blatN_hit_rrn16_NC_036341.1,_position_1_-_1491,_psl
                     _score_99.6,_coverage_100.00%,_match_99.53%"
                     /standard_name="gene"
     gene            63924..64944
                     /gene="trnI-GAU"
                     /Note="blatN_hit_trnI-GAU_NC_036341.1,_position_1_-_72,_ps
                     l_score_69.5,_coverage_100.00%,_match_100.00%"
                     /standard_name="gene"
     exon            63924..63960
                     /gene="trnI-GAU"
                     /standard_name="exon"
     tRNA            join(63924..63960,64910..64944)
                     /gene="trnI-GAU"
                     /standard_name="tRNA"
     intron          63961..64909
                     /gene="trnI-GAU"
                     /standard_name="intron"
     exon            64910..64944
                     /gene="trnI-GAU"
                     /standard_name="exon"
     gene            65009..65880
                     /gene="trnA-UGC"
                     /Note="blatN_hit_trnA-UGC_NC_036341.1,_position_1_-_73,_ps
                     l_score_71.3,_coverage_100.00%,_match_100.00%"
                     /standard_name="gene"
     exon            65009..65046
                     /gene="trnA-UGC"
                     /standard_name="exon"
     tRNA            join(65009..65046,65846..65880)
                     /gene="trnA-UGC"
                     /standard_name="tRNA"
     intron          65047..65845
                     /gene="trnA-UGC"
                     /standard_name="intron"
     exon            65846..65880
                     /gene="trnA-UGC"
                     /standard_name="exon"
     rRNA            66033..68842
                     /gene="rrn23"
                     /standard_name="rRNA"
     gene            66033..68842
                     /gene="rrn23"
                     /Note="blatN_hit_rrn23_NC_036341.1,_position_1_-_2810,_psl
                     _score_99.5,_coverage_100.00%,_match_99.43%"
                     /standard_name="gene"
     gene            68941..69043
                     /gene="rrn4.5"
                     /Note="blatN_hit_rrn4.5_NC_036341.1,_position_1_-_103,_psl
                     _score_98.1,_coverage_100.00%,_match_98.06%"
                     /standard_name="gene"
     rRNA            68941..69043
                     /gene="rrn4.5"
                     /standard_name="rRNA"
     rRNA            69268..69388
                     /gene="rrn5"
                     /standard_name="rRNA"
     gene            69268..69388
                     /gene="rrn5"
                     /Note="blatN_hit_rrn5_NC_036341.1,_position_1_-_121,_psl_s
                     core_99.2,_coverage_100.00%,_match_99.17%"
                     /standard_name="gene"
     tRNA            69631..69704
                     /gene="trnR-ACG"
                     /standard_name="tRNA"
     gene            69631..69704
                     /gene="trnR-ACG"
                     /Note="blatN_hit_trnR-ACG_NC_036341.1,_position_1_-_74,_ps
                     l_score_100.0,_coverage_100.00%,_match_100.00%"
                     /standard_name="gene"
     tRNA            complement(70307..70378)
                     /gene="trnN-GUU"
                     /standard_name="tRNA"
     gene            complement(70307..70378)
                     /gene="trnN-GUU"
                     /Note="blatN_hit_trnN-GUU_NC_036341.1,_position_1_-_72,_ps
                     l_score_98.7,_coverage_100.00%,_match_98.61%"
                     /standard_name="gene"
     gene            70718..76254
                     /gene="ycf1"
                     /Note="blatX_hit_ycf1_NC_036341.1,_position_1_-_5621,_psl_
                     score_83.9,_coverage_98.44%,_match_66.72%"
                     /standard_name="gene"
     CDS             70718..76254
                     /codon_start=2
                     /gene="ycf1"
                     /standard_name="CDS"
     CDS             76663..76934
                     /codon_start=2
                     /gene="rps15"
                     /standard_name="CDS"
     gene            76663..76934
                     /gene="rps15"
                     /Note="blatX_hit_rps15_NC_036341.1,_position_1_-_272,_psl_
                     score_86.4,_coverage_99.63%,_match_86.08%"
                     /standard_name="gene"
     gene            77041..78222
                     /gene="ndhH"
                     /Note="blatX_hit_ndhH_NC_036341.1,_position_1_-_1176,_psl_
                     score_91.3,_coverage_100.51%,_match_92.01%"
                     /standard_name="gene"
     CDS             77041..78222
                     /codon_start=2
                     /gene="ndhH"
                     /standard_name="CDS"
     exon            78269..78775
                     /gene="ndhA"
                     /standard_name="exon"
     CDS             join(78269..78775,80011..80550)
                     /codon_start=2
                     /gene="ndhA"
                     /standard_name="CDS"
     gene            78269..80550
                     /gene="ndhA"
                     /Note="blatX_hit_ndhA_NC_036341.1,_position_55_-_1095,_psl
                     _score_87.6,_coverage_95.62%,_match_85.30%"
                     /standard_name="gene"
     intron          78776..80010
                     /gene="ndhA"
                     /standard_name="intron"
     exon            80011..80550
                     /gene="ndhA"
                     /standard_name="exon"
     gene            80640..81104
                     /gene="ndhI"
                     /Note="blatX_hit_ndhI_NC_036341.1,_position_1_-_465,_psl_s
                     core_89.9,_coverage_97.48%,_match_87.63%"
                     /standard_name="gene"
     CDS             80640..81104
                     /codon_start=2
                     /gene="ndhI"
                     /standard_name="CDS"
     gene            81494..82024
                     /gene="ndhG"
                     /Note="blatX_hit_ndhG_NC_036341.1,_position_1_-_531,_psl_s
                     core_87.8,_coverage_100.00%,_match_87.76%"
                     /standard_name="gene"
     CDS             81494..82024
                     /codon_start=2
                     /gene="ndhG"
                     /standard_name="CDS"
     gene            82259..82564
                     /gene="ndhE"
                     /Note="blatX_hit_ndhE_NC_036341.1,_position_1_-_306,_psl_s
                     core_93.8,_coverage_100.00%,_match_93.79%"
                     /standard_name="gene"
     CDS             82259..82564
                     /codon_start=2
                     /gene="ndhE"
                     /standard_name="CDS"
     CDS             82822..83067
                     /codon_start=2
                     /gene="psaC"
                     /standard_name="CDS"
     gene            82822..83067
                     /gene="psaC"
                     /Note="blatX_hit_psaC_NC_036341.1,_position_1_-_246,_psl_s
                     core_92.7,_coverage_100.00%,_match_92.68%"
                     /standard_name="gene"
     gene            83202..84703
                     /gene="ndhD"
                     /Note="blatX_hit_ndhD_NC_036341.1,_position_1_-_1503,_psl_
                     score_88.1,_coverage_99.93%,_match_87.96%"
                     /standard_name="gene"
     CDS             83202..84703
                     /codon_start=2
                     /gene="ndhD"
                     /standard_name="CDS"
     gene            complement(85034..86005)
                     /gene="ccsA"
                     /Note="blatX_hit_ccsA_NC_036341.1,_position_1_-_972,_psl_s
                     core_87.5,_coverage_100.00%,_match_85.91%"
                     /standard_name="gene"
     CDS             complement(85034..86005)
                     /codon_start=2
                     /gene="ccsA"
                     /standard_name="CDS"
     tRNA            complement(86115..86194)
                     /gene="trnL-UAG"
                     /standard_name="tRNA"
     gene            complement(86115..86194)
                     /gene="trnL-UAG"
                     /Note="blatN_hit_trnL-UAG_NC_036341.1,_position_1_-_80,_ps
                     l_score_100.0,_coverage_100.00%,_match_100.00%"
                     /standard_name="gene"
     gene            87024..89237
                     /gene="ndhF"
                     /Note="blatX_hit_ndhF_NC_036341.1,_position_1_-_2253,_psl_
                     score_86.4,_coverage_97.36%,_match_79.38%"
                     /standard_name="gene"
     CDS             87024..89237
                     /codon_start=2
                     /gene="ndhF"
                     /standard_name="CDS"
     gene            complement(89348..90161)
                     /gene="ycf1-fragment"
                     /Note="blatX_hit_ycf1-fragment_NC_036341.1,_position_1_-_8
                     02,_psl_score_94.7,_coverage_14.47%,_match_13.65%,_fragmen
                     t_match_95.76%"
                     /standard_name="gene"
     CDS             complement(89348..90161)
                     /codon_start=2
                     /gene="ycf1-fragment"
                     /standard_name="CDS"
     tRNA            90501..90572
                     /gene="trnN-GUU"
                     /standard_name="tRNA"
     gene            90501..90572
                     /gene="trnN-GUU"
                     /Note="blatN_hit_trnN-GUU_NC_036341.1,_position_1_-_72,_ps
                     l_score_98.7,_coverage_100.00%,_match_98.61%"
                     /standard_name="gene"
     tRNA            complement(91175..91248)
                     /gene="trnR-ACG"
                     /standard_name="tRNA"
     gene            complement(91175..91248)
                     /gene="trnR-ACG"
                     /Note="blatN_hit_trnR-ACG_NC_036341.1,_position_1_-_74,_ps
                     l_score_100.0,_coverage_100.00%,_match_100.00%"
                     /standard_name="gene"
     rRNA            complement(91491..91611)
                     /gene="rrn5"
                     /standard_name="rRNA"
     gene            complement(91491..91611)
                     /gene="rrn5"
                     /Note="blatN_hit_rrn5_NC_036341.1,_position_1_-_121,_psl_s
                     core_99.2,_coverage_100.00%,_match_99.17%"
                     /standard_name="gene"
     gene            complement(91836..91938)
                     /gene="rrn4.5"
                     /Note="blatN_hit_rrn4.5_NC_036341.1,_position_1_-_103,_psl
                     _score_98.1,_coverage_100.00%,_match_98.06%"
                     /standard_name="gene"
     rRNA            complement(91836..91938)
                     /gene="rrn4.5"
                     /standard_name="rRNA"
     rRNA            complement(92037..94846)
                     /gene="rrn23"
                     /standard_name="rRNA"
     gene            complement(92037..94846)
                     /gene="rrn23"
                     /Note="blatN_hit_rrn23_NC_036341.1,_position_1_-_2810,_psl
                     _score_99.5,_coverage_100.00%,_match_99.43%"
                     /standard_name="gene"
     gene            complement(94999..95870)
                     /gene="trnA-UGC"
                     /Note="blatN_hit_trnA-UGC_NC_036341.1,_position_1_-_73,_ps
                     l_score_71.3,_coverage_100.00%,_match_100.00%"
                     /standard_name="gene"
     exon            complement(94999..95033)
                     /gene="trnA-UGC"
                     /standard_name="exon"
     tRNA            join(complement(95833..95870),complement(94999..95033))
                     /gene="trnA-UGC"
                     /standard_name="tRNA"
     intron          complement(95034..95832)
                     /gene="trnA-UGC"
                     /standard_name="intron"
     exon            complement(95833..95870)
                     /gene="trnA-UGC"
                     /standard_name="exon"
     gene            complement(95935..96955)
                     /gene="trnI-GAU"
                     /Note="blatN_hit_trnI-GAU_NC_036341.1,_position_1_-_72,_ps
                     l_score_69.5,_coverage_100.00%,_match_100.00%"
                     /standard_name="gene"
     tRNA            join(complement(96919..96955),complement(95935..95969))
                     /gene="trnI-GAU"
                     /standard_name="tRNA"
     exon            complement(95935..95969)
                     /gene="trnI-GAU"
                     /standard_name="exon"
     intron          complement(95970..96918)
                     /gene="trnI-GAU"
                     /standard_name="intron"
     exon            complement(96919..96955)
                     /gene="trnI-GAU"
                     /standard_name="exon"
     rRNA            complement(97252..98742)
                     /gene="rrn16"
                     /standard_name="rRNA"
     gene            complement(97252..98742)
                     /gene="rrn16"
                     /Note="blatN_hit_rrn16_NC_036341.1,_position_1_-_1491,_psl
                     _score_99.6,_coverage_100.00%,_match_99.53%"
                     /standard_name="gene"
     tRNA            complement(98967..99038)
                     /gene="trnV-GAC"
                     /standard_name="tRNA"
     gene            complement(98967..99038)
                     /gene="trnV-GAC"
                     /Note="blatN_hit_trnV-GAC_NC_036341.1,_position_1_-_72,_ps
                     l_score_100.0,_coverage_100.00%,_match_100.00%"
                     /standard_name="gene"
     misc_feature    
                     /note="Geneious type: Editing History Deletion"
                     /standard_name="CACTATTACCCCCAAAAAACCAAACTCTGCCTTACGTAAAGT
                     TGCCAGAGTACGATTAACCTCGGGATTTGAAATCACTGCTTATATACCCGGTATTGGC
                     CATAATTTACAAGAGCATTCTGTAGTCTTAGTAAGAGGGGGAAGGGTTAAGGATTTAC
                     CCGGTGTGAGATATCACATTGTTCGAGGAACCCTAGATGCTGTCGGAGTAAAGGATCG
                     TCAACAAGGGCGTTCTAGTGCGTTGTAGATTCTTATCCAAGACTTGTATCATTTGATG
                     ATGCCATGTGAATCGCTAGAAACATGTAAAGTGTATGGCTAACCCAATAACGAAAGTT
                     TCGTAAGGGGACTGGAGCAGGCTACCATGAGACAAAAGATCTTCTTTACTAAAGAGAT
                     TCGGAACTCTTATATGTCCAAGGTCCAATATTGGAAGAATTTCAGAGGTTTTCCTTGA
                     CTTTGTCCGTGTCAACAAACAATTCGAAATGCCTCGACTTTTTTAGAGCAGGTCCGAG
                     TCAAATAGCAATGATTCAAAGCACTTCTTTTTACACTTTTTCGGAAACCCAAGGACTC
                     CATCGTATGGATATGTAAAATACAGGATTTCCAATCCTAGCAGGAAAAGGAGGGAAAC
                     GGATACTCAATTTAAAGTGAGTAAATAGAATTCCATACTCAATCTCATAGATACATAT
                     AGAATTCTGTGGAAAGCCGTATTCGATGAAAGTCGTATGTACGGCTTGGAGGGAGGTC
                     TTTCATATCTTTCGAGATCCACCCTACAATATGGGGTCAAAAAGCCAAAATAAATGAT
                     TTTATTAGCCCTTATAAAAGGAAAACTGATTCTTGAGAACCCCTTGTACGCTCATGTC
                     ACGTCGAGGTACTGCAGAAGAAAAAACTGCAAAATCCGATCCAATTTATCGTAATCGA
                     TTAGTTAACATGTTGGTTAACCGTATTCTGAAACACGGAAAAAAATCATTGGCTTATC
                     AAATTATCTATCGAGCCATGAAAAAGATTCAACAAAAGACAGAAACAAATCCACTATC
                     TGTTTTACGTCAAGCAATACGTGGAGTAACTCCCGATATAGCAGTAAAAGCAAGACGT
                     GTAGGCGGATCGACTCATCAAGTTCCCATTGAAATAGGATCCACACAAGGAAAAGCAC
                     TTGCCATTCGTTGGTTATTAGGGGCATCCCGAAAACGTCCGGGCCGAAATATGGCTTT
                     CAAATTAAGTTCCGAATTAGTGGATGCTGCCAAAGGGAGTGGCGATGCCATACGCAAA
                     AAGGAAGAGACTCATAGAATGGCGGAGGCAAATAGAGCTTTTGCGCATTTTCGTTAAT
                     CCATGAACAGGATCTATATAGACTCATGGAGCCATACATCTCGATCGGAAAAGAATCA
                     ATAGAAAAAGAAAGAATCGGAATTGATCGCTATATTTCTCGAAACAAACGAAAAGGAA
                     ACGAAAGATGAAACATAAATCATGGATCAATTAAGCCCTCTCGGGGACTTGCTTAAGA
                     TAAGAATAAAAAAAAGGTAAATACCATGGAATAAGGTTTGATCCTATTTATGGGGATT
                     CCGTAAATATTCCATTCCAAAAAAAAAAAGAGAAAGTTCGAAACAATTGGGATTTTTT
                     GGAGATTGGATGCAGTTACTAATTCATGATCTGGCATGTACAGAATGAAAACTTCATT
                     CTCGATTCTACGAGAATTTTTATGAAAGCCTTTCATTTGCTTCTCTTCGATGGAAGTT
                     TGATTTTCCCAGAATGTATCCTAATTTTTGGCCTAATTCTTCTTCTGATGATCGATTC
                     AACTTCTGATCAAAAAGATATACCTTGGTTTTATTTCATCTCTTCAACAAGTTTAGTA
                     ATGAGTATAACGGCCCTATTGTTCCGATGGAGAGAAGAACCTATGATTAGCTTTTCGG
                     GAAATTTCCAAACGAACAATTTCAACGAAATATTTCAATTTCTTATTTTACTATGTTC
                     AACTCTATGTATTCCTCTATCCGTAGAGTACATTGAATGTACAGAAATGGCTATAACA
                     GAGTTTCTCTTATTCGTATTAACAGCTACTCTAGGAGGAATGTTTTTATGCGGTGCTA
                     ACGATTTAATAACTATCTTTGTAGCTCCAGAATGTTTCAGTTTATGCTCCTACCTATT
                     ATCTGGATATACCAAGAAAGATGTACGGTCTAATGAGGCTACTATGAAATATTTACTC
                     ATGGGTGGGGCAAGCTCTTCTATTCTGGTTCATGGTTTCTCTTGGCTATATGGTTCGT
                     CCGGGGGAGAGATCGAGCTTCAAGAAATAGTGAATGGTCTTATCAATACACAAATGTA
                     TAACTCCCCAGGAATTTCAATTGCGCTTATATTCATCACTGTAGGAATTGGGTTCAAG
                     CTTTCCCTAGCCCCTTCTCATCAATGGACTCCTGACGTATACGAAGGAGTGCGGTTCG
                     TTCGAAAAATTCCTACTTCTCTATCTATCTCTGAGATGCTTGGATTTTTCAAAACTCC
                     ATGGACATGCAGAAGAGAAATGCTATCCGCACTCGGACCAAGACATAACTTTTACTTG
                     TTCAAATAACAATTAAGGTGAAGCAGCGTCAGGAACAACGAATCTCTTTATGATAAAC
                     AAGATTCATTTTGCAAGTTCGTTATTACGGGTAGCTCCTACAAAAGATCGGACTAATG
                     ACGTATACAATATTTAAATTCTCGATGTAGATGCTACATAGTTGGTTCTCATCCTTCA
                     GAGACTACGAGTGTAATAGGAGCATCCGTCGACAAAAGGATCACCCTAAGATGATCAT
                     CTCATGGCTATTGAGAACGAATCAAATCAGATGGTTCTATTTCTCAATCTTTTCGACC
                     TCTTGGTTCCGTAGGAGCAAGTCAGAAAGATTGAGAAAAATTGGTCATTCACAACCAC
                     TGATGAAGGATTCCTCGAAAAGTTAAGGATTAGTAATCCTTTTTAGAAATCGAATGGA
                     TTCGGTCTTATACATACGCGAGGAAGGTAATCAAAAAAGAAAGAAGATGAGTTCTTCT
                     TTCTTTTATCACTTAGGAGCCGTGCGAGATGAAAGTCTCATGCACGGTTTTGAATGAG
                     AGAAAGAAGTGAGGAATCCTCTTTTCGACTCTGACTCTCCCACTCCAGTCGTTGCTTT
                     TCTTTCTGTTACTTCGAAAGTAGCTGCTTCAGCTTCAGCCACTCGAATTTTCGATATT
                     CCTTTTTATTTCTCATCAAACGAATGGCATCTTCTTCTGGAAATCCTAGCTATTCTGA
                     GCATGATAGTGGGGAATCTCATTGCTATTACTCAAACAAGCATGAAACGTATGCTTGC
                     ATATTCGTCCATAGGTCAAATCGGATATGTAATTATTGGAATCATTGTTGGAGACTCA
                     AATGGTGGATATGCAAGCATGATAACTTATATCTTCTTCTATATCTCCATGAATCTAG
                     GAACTTTTGCTTGCATTGTATTATTTGGTCTACGTACCGGAACTGATAACATTCGAGA
                     TTATGCAGGATTATACACGAAAGATCCTTTTTTGGCTCTCTCTTTAGCCCTATGTCTC
                     TTATCCCTAGGAGGTCTTCCTCCACTAGCAGGTTTTTTCGGAAAACTCCATTTATTCT
                     GGTGTGGATGGCAGGCAGGCCTATATTTCTTGGTTTCAATAGGACTCCTTACGAGCGT
                     TGTTTCTATCTACTATTATCTAAAAATAATCAAGTTATTAATGACTGGACGAAACCAA
                     GAAATAACCCCTCACGTGCGAAATTATAGAAGATCCCCTTTAAGATCAAACAATTCCA
                     TCGAATTGAGTATGATTGTATGTGTAATAGCATCTACTATACCAGGAATATCAATGAA
                     CCCGATTATTGAAATTGCTCAAGATACCCTTTTTTAGCTTCTAGAACCTATTTCTTAG
                     TTCAAGATCCCTCTTACTAACTGGAATCAAAGAATTAGTAGATCTGTTCCGCCCAAAA
                     TGGGAATGGGCTAGGGTTATGAACTTATAATCTGATAATCGAGTCGATTCCATGATTA
                     TAAGTTCATTCCATACCGGACCAGACCGGAATAGGCTTATATACATTCTCATTATGAG
                     AAGGGGTCATTCGAGCGTATCTAAATAGATACTATCGTATCTAAATAGATACTATGTT
                     TACATATGGATCCCTCCGTCGTTACATTCCATTTAGGATTAGGAATAGGCGTAATCGG
                     ACCTGCTTTTTACATATATATCTCTCCTTATTTGGGACCCTATTCTATTCACCTCTTT
                     GGGCGTCTATTGAATCGAGAAATGGGTTTGATTGTCCATTTTTTTGCTATAATTTTTT
                     GCTATAATATATATATAAGGCATGTTCCGGATAATTCAAATCGAAGCAATTGGATGTC
                     CGACTCGGGCCTATATGACATGAACGATCAATAGAAATACTCCAACACTCCACCTTTG
                     TCATATATTCCATACATCACACTAGATAGATATCATATTCATGGAATACGATTCACTT
                     TCAAGATGCCTTGGTGGTGAAATGGTAGACACGCGAGACTCAAAATCTCGTGCTAAAG
                     AGCGTGGAGGTTCGAGTCCTCTTCAAGGCATAATATTGAGAATGCTCATTGAATTGGA
                     ATAAGTTCGGCAGCGGATCACGAAATCTTGGTGATCTTCTCTATCTAATGAATGGGGA
                     GTCCGCTTTGAAATCGTTCGCCCTGCAACCACCCCCGAGTATATGCTTCAACAGGAAT
                     TACACAAGGGTAGATTGATACAATAGAAACCTCTGGTAAAATGCCCGCCCGTCACCCA
                     ACAGATAAAGTACATTACATAGTCCGTTTTAGGGATTGGCGACTTACCCATTCAGTGA
                     CTTTGGCACTGGATGGTCCCAAAAAAAAATGGGTACTATCGGGTCGGGTGAATTCAAT
                     AATAGGCGTCTGTTGGCATTCCATCCTTCCTTCTCCTTTCAGGGACTATCCGAAAGAG
                     AATCCAGTACTTCTTGGTCGTGAATATCTGAATAGGACGAACCGCCCCGTGGATATCT
                     TTGCTTCGGAACAAAACAATTAGAATTAGGCCCGGTCAACTGGAATGTGTATTATCCA
                     TATAGGGGATCTTCCAATTGAGAAGATCCATCGACCTGAGACGAAGAGAAGGGTCTAT
                     CTATTTTATTTAGTTATTCATTTAGTTATTCAGTTAAACCAATGATTCGTTATTGGAG
                     CAGATAGCAACAACCACCATTTCATCCGACATACGTATTTTTGATTTTCCAATGGATT
                     TACATCTTTCATTAATGGAAATTTTTTGATGTAGTGAGTAATAGCTCTGGTTGCTCGC
                     TGTTCAAGAATTCTTGTTTAGGCAGTTCATACCATCCATACATAGTGTTTTGATCTAA
                     GATTTCAATTCTTCCATGTTTCAGCAGTAACATATTCTTCCATGTCCAAAATATGGAA
                     GAAAGAGGTGTTTCCACGACTTTACCACCCAGTCAATTCTGTTCCACTTAATCTCTAT
                     TTCATGGCCACATATCTTTCAGGCTAAGGAATGGGAAACCTTTCTCCTATTACATGAA
                     TCCAATTTCATCCGGGAAAAGCCATCTTTTTCTCAACAATGCCTTTGTCATTTGATCC
                     AATAGCGTTCCGTTAGATAGGAACAGATTTGATAAATACTGATAACTCTCGGATAGAG
                     TATTAGAACGGAAAAATCCATTAGATAATGAACTATTGGTTCTAAGCCATTTCTGGCG
                     ATGAATCAACAATTCGAAGTGCTTTTCTTGCGTATTCTTGATAAACCAGCGTTTATAT
                     ATAGATGTAGGAGGATTGGTTTGGGAAGTAAGAAGCCCCTTTGACATCTCTTCATCTG
                     CAAAGAATTCTTGATGTGAAAACACAGAGACAAAGGGGGGATCTTTGAATAGGAAAAA
                     GAGTGGATCCGCAGGGTCCCAAATGAATTGGCTTATTCGAAAAAAGCCTTGTTCTTTG
                     GAAGATCTATCTCCTGTCTGGTACTGCATGGTTCCACTCTGCAAGAACTCCGAATCGT
                     TCTCTTGAAGCTCATCCTCTTCATCATAAATGATCCGCTTGTCCCGAAATGACCTGGC
                     CCAATAGGGAAATCCCAATTCATTGGACCTTTCGATACAATCAAATAGAAAGCCCCAG
                     GGGCGCCATATTCTAGGAGCCCAAACTATGTGATTGAATAAAACCTCCTCTATCTGTT
                     GTGGATCGAGGACTCCTTCTCCTTCCCCTTCTTCAAACTCCGATTCGTATTTTTCATA
                     GAGAAATCTCTGATCAAGGATAGAACAAGATCCATTTTGCATCATATCTAAGGGACTC
                     CTTGGTTCGGGCCGAAGAAGCAATGTCACTCGATCATTATCAAACCGACTGCAATCTT
                     TTTCTGTCCGTGAGGATCCCACCAGAGCGCCTTCTACTTCTAATAGGCCGTGAACTAG
                     ATCCGAATCATTTTCAACAAGTCCATAATAAGTGATCCCATTTTTTTCATCGGGTCCG
                     GGTAGAGACCAAAGGTCTTGAGCAACCAATCCGGCAGAACAACTCAAAAGATAAAGAA
                     GTATCGTCAATTTCTTCATGCTCGTTCCAAGTTCGAAGTACCATTTGTACAAATAAGA
                     ATCCCCTTCATTACATGATTTCTTCTTCATATAGATAGATATAGGATCTACGGGGCAA
                     TTACTTAGAAATACATTTTGTGCAACAGCCCTTCCTATCTGATAGAAAAGGATCCCAT
                     GATCCTGAACCGATCTTACCTGGGATCGCAAATCCCAAGTTTGTCTATGAAGAGCAGA
                     TCTAATTATATTAGTGTCTATAATTGATTTCTTCTGTGTAATACTAATTGATAGGGCC
                     TCATTGGTAAGTGCTACAAGATCTCGTACATTGGAACCCATGGTTATGGACCCGAATC
                     CATTAGTATGGAACATTTTCTTTTCCAAGTGAAATCCCCTAGTATATGAAAGAGTGAA
                     AAAGTGCTTTCGTTGTTGTGGAATAAGAAGCCTTCGTATCTTAATGCATGTATTTAAT
                     TTATTCGGAGCTATTAGAGCGGGATCCACTTTTTGGGGAATATGAGTCGAAGCAATAA
                     CAAGAATATCTCTAGTGGAACATCTTTCACAATCCCTGGAGAGATAGTTCACTAATAG
                     ACCAAGGGATAAGTAATTCGACTCATTCACATCCAGATCATGAATGTTTGGAATCCAT
                     ATTATGCAAGGAGACATTGCTTTTGCTAATTCGAATTGAAGGGTGATATAAAATCGGT
                     CTATTTCCGGCATCATATCCATAGTTAGCGCATTCATCCTAGTTAGAAGCTCCAGCTC
                     CGTATCAAGGTCACGGTCGAGATCGTCACTCACATCAATATCGTCACTATCATCAATA
                     AGAAAACCCTTAGGCTTGTTATCCAGGAACTTGTTAAGAAATACTGTAATGAAAGGAA
                     CATAGGAGTTTGTCGCTAGGTATTTGACCAAATAGGATCGTCCAGTTCCTATAGAACC
                     TATCACTAAAATACCCCTAGAGGGGGATAGGGCTAAGCGGAGCGAAAAGGGTTTTCCA
                     TGAGATGGGAAATGAAAACTATTCGCCCCACACGAGGTTTGTGAATAAGTGATTGTCT
                     GATAATGAGCAAGGAATATCCGTCTTTCGGCTAAACAGGGTGTATTGAACTCATAATT
                     CATTAGATACTTTTTATGAATGTCAACTAAGTATCGTAAGTAAATGGATCCCGGCTCT
                     TCAATCATTTGATAACCAGAGTCATTCTTTGATAAATGATCACTATGAGTCAGACTCA
                     ATAGAATTTGATCAATCCTTTTTTCTGTCGTTAAGGTGGAGAACTGAACCAAGAATTC
                     TCTTTCTTTATCATCAATTGAATCACTGTTCGCGACCAAGGATTCTATTTTATCATCA
                     ATCCAATCACCGTTCACGTTTTTTCTTTTTCTTATCAATGAATAAATCTCTTTACTTG
                     TATGACTTAGATGTCTCGTATTTCTCGAAAAAGTGATTCGATTGATGGGATTTGGTAT
                     GATACTTATGAGATCGATGAGATTGATATTCAAAAATTTCTTCTTAGAACGTATTGAT
                     TTGACCCCATAAGCGGGACCACCACCCCATAGCATGTTGACGCCAGAAGCAGAACCCC
                     GTATTTCTTCTAGAAAATCTCCTAATTGTTCCAGAGCAACTAGAAAGAGATTCTTTAA
                     CCAGAAAGAATTCAGTTCAGATGTAGGATACCTATCCAGAAGTTTTCGCAACTCAATC
                     ATGTATGATGGAATCATCAAAGATTTGACCTTTTCGAACTCTGTCTGTAACTCACTAG
                     AGGCTCGGGAAACAAAGAGAAGATGTGTACGAACGAGATATCCAGCAACAAGAAGAAG
                     GAAAAGGATTGAATAGAGGAACTCCCGAACGTTTGGCGATCTCAGATGTGTCGATATC
                     AATGGTGACTCATTATTTCGATGAATCATTTCTTCGGACAGAAGAAGATTATGTAAAC
                     ACTTACTCGAAATCTCGCTTATCAGATTCCATTGTGGAAGACACAATTTTTTCTGAAG
                     AATTCGCCATGATATATCTAATCCATGCATAATATCATGAAAAATGGATACAAATTTT
                     TGACTGCTACTTAGTATCGGTAATAGGTCTGAAAAGGTATCTAAAAATATCAAATTTA
                     GATATTTGTACCCTGTCGAAGTAAGGAACCATGGCATATATGTTTGGAATAGATTCCA
                     TTTTGAGAGAGTTGAAAAAGCACTATCTCGTTGAAAGGTTCTATACATCTGCCCTTTT
                     TCAACGCATTTCTTTAGACAAAGACTCCGTTTTTTCCTCTTTTCGGATGGTAAATCTT
                     TCTCAGAACATGGAGTGTGAATCAAACCCATGTTTGAATTGAAATTGAGATACTGATG
                     CAAGTTCTTCCCTTCTGAATCAGATAGATTCATATCCGAAAGAGGTTGACAATAAGTT
                     CTTTCAAAATTGACTATTTGTCCCTCTGTTAGAGGTGTTCCAGAAATGTCTGCGATCG
                     AATAAATAGCTCTACGAACGAATGGATCGGATCGAATTGGAAAATGGAAAGATTTGTA
                     CAAGTTATACCTTTCGTCACCACTTCGTGGAAAATCATTAGGTATGAATATGTTAGAT
                     ACCTGTGACTCGATTGGTGAAATAGTATCTCTCTCCAAAAAAGCATGTTTTTTTTTAC
                     CGCCGCACAAAGACAAAGAGAATATTTTGTTGCGAATGAACAAGATATTGAGGAATTG
                     TCCATACGTAAAATCATAATTCTTGATACGGGCCTTTTCCACATAAAAAGGGAATCTT
                     TTGTTACAATAGAAGCAGAAGTGATGTAGATTATTCAAGAATCGAAGTCGATTTGCTT
                     TATAAAAAGAAGATATCAATGAACTTCTATGAAATGGTTTTACGGGATTCAGCCAATT
                     GTCTTGATCGTGGGATATCATTGAGAAATAGGAATCCGTGTTATCAAAAGATTTCCTG
                     CGATTATTTCTAGTATGGAATGAGTCAATCATCCACTTTGGTATCTTATTGAACAAAA
                     ATGGTGATATTGTTCCTCCATTGATCAAAAATTTCGATTTTTGGGAAGTATCATGATC
                     ATCCAATAAGAAGGGTTTCCATTTTTTCAAATGAACGATTTGAAGACCTATTGGTTCT
                     AACAGCTGATTACAGAGTTGATCATTCGGACCTTTCAATTCATAGATATGGATCTCGG
                     ACCTTTGAATGGGGATATTCCCGAAACTCACAAAGAAAAAAGGAAGTGAGTTAGACAA
                     AAAGAGAAGAAACTTGGACAAAAAAAGAAGTAACTTGGACAAAAAGAAACGAAGTGAC
                     TTAGACAAATCTTTTTTGTCGATAACCTCAGACCAATCAATCGAATATTGATTAATAC
                     GTAATCGATCGAACACTACTTGAAACTTCTGCTCAGAAATGAAATGTTCCAAATGCTC
                     CTGGAAATTCTTGCTCCCATTAGACCATTTGTATCTATATGCATTAGGATCCCAATTC
                     ATGGATCTCTCGGTTCGAGAAAGAAAAATAAGAGGATCGAACCATTTCTTCTGACTCT
                     GTTTCAAATTCGATAAATGTTGGTTAATCGTATATTTCATTATAGTTCTATGATTCAG
                     AGTATCATTTCCTATTTGATCCCTTTGAATTCCATATTCGAAGTTGCGATCGGATCTA
                     TTCATTAAAAAGAATTGATTCAATACATTTCTTCCATAGGTGCTATATTGGATTTGAA
                     TCAGATTTCGGATCAATCCATATTGATTGACTGCCTCCATTATGTTGTTCCTAGCCAC
                     TATTTTTTGTTTTGGATCTTCCAAATCATTCCCGCAGGAGATCCGGACCCATCTTTTT
                     CTGATCCTTCGATAAAAAGATTCATTCTCTTCATAAAAAATAGGAGGTAGAACCAATA
                     AAGATTTCTTTTTCGATTCATCCCTGGAGTTGAATACCTCATTCAAGAATTGTTTTTG
                     ATCCAATCCGTAGGAATCAATAAAAAAGGCAAATCCCTTATCATACACCCGATCCGGC
                     TCGGTTATTGATAGAGTGAATAGATCCGCTATTTCTTGAAATCTCTTTTCTGATTCAA
                     AATCGTGGTGTAACGTGTATCCCCCCCCGTTCCGATCATGGAATAGATGAAATAAATC
                     AAAAAATGGATTTTTGTTCAAGAAAGAAATCTTATTGGAACTGTCCATATCCAGTTCA
                     TCCTTCAGAACCATATCACATCCCGGATCTGATGAAATAGGATGAATTGAGACGGTAT
                     TTTGTAAATACGTAATTATCTTGAATATATTCACTATTTCTTTATTTTCCGATCGCCT
                     GGAAGGGACAAAAGAAATATCTTGTTCTTTCTTCAACAATTTCTGATCTCTAGTGGAC
                     TTCTCAGTAGGATTCGAACCCAGATGAGGTTCGGACCATCTGTCAGAGAAAAAAGAAC
                     GAATGGATCTTGTAGGATTCCCAAGAAATTCTTCAATTTCTTCCGGAAGCAGATGATT
                     ATTCATCTCCTTCTCACCTTCCGCGAATAGCCGGGACATTGAGGAATATCCAGAAAGG
                     CATTTAGGGAATCGGTCTGATTCTATCTCTGTTCGTTCCGTTTGACGAAAGGAAGGAT
                     CCCAAAGAATCAATCTTTCTTTTAGTTTTAGTTGTTGAATCTCTCTTTGATTGATCAA
                     TGTGTGATATTCCGAATCCTCATTCCTAATGGAATCGAAATGATCTCTGGATTGATCA
                     GAAGATCCCTTCAATTGGCTAGAATCCCTTCCTTGAACGAAACTAGATCTTGTGGAAT
                     CATATTGAATATTTGACGATATATTCCGTGCCTTGCTAAAAAACCGATCCTTGTTTAC
                     CAACCACACATTGTCTAACCAAATCCAATTCTCTCTCGATATGTTCCTCAAAAAATCC
                     GATTCGTGCGGATTATTCCCCCAACTAACGAAGAGATCTTGGCGGAATTGCCACATAT
                     GAAATTGAGCACAATTTTGCAAAGAAATAGCCCACTTCTTTCTAGAGAAGAGATGGGA
                     AACATGCTCAATATCATTTGATTGAATAGTTGACCCAGCTCCTTGTTGTTTGAAGAAC
                     CCCTCCACTTCAATTGGTATTTTTTCACGAAAAGCAAACATGAGATAACAAATCCAGT
                     CTTTCACTAAGATTTCGAATAGCTGTCCCGAATTCAAGTTGATTATGTTTCGCCCCTT
                     CCTCGGAGAAAGATGATCAAACAATTCCCAATCGTGGTCCTTGCGGATCGGATCATTC
                     ATATAATATACAAAAAGAAACTCCAGATATTTGATATCTTTCTCTTTGAATGAGATCT
                     CAATTCCAGCGACGGTTTCATTAGATATCTTCCAACTAGAATCCTTCTTTTTTCCGAT
                     CCAGTTCCTCCACCACCGCGAACCCCAGTTAGATTCAGACATGATACACTTTTTAGTT
                     ATTGGAAGAACCCAAGTACTCTCTTTCGGATCCAGGAAACAGCTCTCAGAGATCTTTT
                     TTCCTTTTGGAAGATACAGGAGTGAAACAATCAACCTATTGATATTGGAAGACCCAAA
                     GGATTCTTCCAATGTATCATTTCTGGGTCCAATGGAATTCATAGGTATAGGAAGAAGC
                     CCTGTCAAATAGAGATTTTTTCTTTCGACCATCTTTCGATTGTTAATACGATATATAA
                     GGACCACTACTACAAATAGTACTACACCCTTGATCGTGAAATATCGATTGCTTGTTGA
                     ACCCTGTGAATTGCGTGAAAGTAGGATACTCCAAATTCGGGAGTCCAAGAGTTTTATA
                     AAACGCTCTTGATGGAAAAAAATGTGAATGAAAGATCCCACTGAATTGAATTGGGTCC
                     ATGAATCTAAGAAATAGTGAGAATTCTTGATCTCTCTCAATATCTCTCTCAATTCGAA
                     AATCCAGGATTTGAATTGATGTCCTTTCATTGATTCCTCCTAAATTGCATTGATTTAT
                     CCTAAAGATTTCATTTCAATTGGAATTTGGTTATTCACCATGTACGAGGATCCCCGCT
                     AAGCATCCATGGCTGAATGGTTAAAGCGCCCAACTCATAATTGGCGAATTCGTAGGTT
                     CAATTCCTACTGGATGCACGCCAATGGGACCCTCCAATAAGTCTATTGGAATTGGCTC
                     TGTATCAATGGAATCTCATCATCCATACATAACGAATTGGTGTGGTATATTCATATCA
                     TAACATATGAACAGTAAGAACTAGCATTCTTACTGAGACTAGAACTCATAGGGAAGAA
                     AATAGATTTATGGATGGAATCAAATATGCAGTATTTACAGACAAAAGTATTCAGTTAT
                     TGGGGAAAAATCAATATACTTTTAATGTCGAATTAGGATCAACTAGGACAGAAATAAA
                     GCATTGGGTCGAACTCTTCTTTGGTGTCAAGGTAATAGCTATGAATAGCCATCGACTC
                     CCGGGAAAGGGTAGAAGAATGAGACCTATTATGGGACATACAATGCATTACAAACGTA
                     TGATCATTACGCTTCAACCGGGTTATTCTATTCCACCTCTTAGAAAGAAAAGAACTTA
                     AATCAAAATACTTAATAGCATGGCGATATATTTATACAAAACTTCTACCCCGAGCACA
                     CGCAATGGAGCCGTAGACAGTCAAGTAAAATCCAATACACGAAATAATTTGATCTATG
                     GACAGCATCGTTGTGGTAAAGGACGTAATGCTAGAGGAATCATTACCGCAAGGCATAG
                     AGGGGGAGGTCATAAGCGTCTATACCGTAAAATCGATTTTCGACGGAATGAAAAAGAC
                     ATATATGGTAGAATCGTAACCATAGAATACGACCCTAATCGAAATGCATACATTTGTC
                     TCATACACTATGGGGATGGTGAGAAGAGATATATTTTACATCCCAGAGGGGCTATAAT
                     TGGAGATACCATTATTTCTGGTACAGAAGTTCCTATAAAAATGGGAAATGCCCTACCT
                     TTGAGTGCGGTTTGAACTATTGATTTACGTAATTGGAAGTAACCAATTAGGTTTACGA
                     CGAAACCTAGAAATCGATCACTGATCCAATTTGAGTACCTCTACAGGATAGACCTCAA
                     CAGAAAACTGAAGAGTAACGGCAGCAAGTGATTGAGTTCAGTAGTTCCTCATATAAAA
                     TTATTGACTCTAGAGATATAGTAATATGGAGAAGACAAAATTGTTTCAAGCACCGACA
                     GAACCAGAAGCGCCCCTTGTTTCAAAGAGAGGAAGACGGGTTATTCACATTTCATTTG
                     ATGGTCAGAGACAAATTGAAAGCTAAGCAGTGGGAATTCTAAAGATTCCCCGGGGGAA
                     AAATAGAGATGTCTCCTACGTTACCCCTAATATGTGGAAGTATCGACGTAATTTCATA
                     GAGTCATTCGATCTGAATGCTACATGAAGAACATAAGCCAGATGAAGGAACGGGAAGA
                     CCTAGGATGTAGAAGAGCATAACATGAGTGATTCGGCAGATTTGGATTCCTATATATC
                     CACTCATGTAGTACTTTACTTCATTGTATGATAGATAAGATCCATCTGTATAGATATC
                     ATCATCTACACCCAGAAAGCCGTATGCTTTGGAAGAAGCTTGTACGGTTTGGGAAGAG
                     GTTTTGATTGATCAAAAAGAAGAATCTACTTCAACCGATATGCCCTTAGGCACGGCCA
                     TACATAACATAGAAATCACACTTGGAAAGGGTGGACAATTAGCTAGAGCTGCAGGTGC
                     TGTAGCGAAACTGATTGCAAAAGAGGGGAAATCGGCCACATTAAAATTACCTTCTGGG
                     GAGGTTCGTTTAATATCCAAAAACTGCTCAGCAACAGTCGGACAAGTAGGGAATGCTG
                     GGGTGAACCAGAAAAGTTTGGGTAGAGCCGGATCTAAATGTTGGCTAGGTAAGCGTCC
                     TATAGTAAGAGGAGTCGTTATGAACCCTGTAGACCATCCCCATGGGGGTGGTGAAGGG
                     AGGGCCCCAATTGGTAGAAAAAAACCCGCAACCCCTTGGGGTTATCCTGCACTTGGAA
                     GAAGAAGTAGAAAAAGGAATAAATATAGTGAGAATTTGATTCTTCGTCGCCGTAGTAA
                     ATAGGAGAGAAAATAGAATTTGTTTCTTCGTCTTTTCAAAAAAAAAAATAGGAGAAAT
                     TGACTGTGACACGTTCACTAAAAAAAAACCCTTTTGTAGCAAATCATTTATTAAGAAA
                     AATAAAGAAACTTAACACAAAGGCAGAAAAAGAAATAATAGTAACGTGGTCCCGGGCA
                     TCTACCATTATACCCACAATGATTGGCCATACTATTGCTATCCATAATGGAAAGCAAC
                     ATTTACCTATTTATATAATAGATCGTATGGTGGGTCATAAATTGGGAGAATTTTCACC
                     TACTCTAAATTTCCGGGGACATGCAAAAAATGATAATAAATCTCGTCGTTAATAAAAG
                     CAAATATACATTATAGATGCTTATCTATTTACATTAATAATAAAATACTTAATAGTTT
                     GTAGTTTGGTCTTGTAGTCCTGGGCGAACGACGGGAATTGAACCCGCGCATGGTGGAT
                     TCACAATCCACTGCCTTGATCCACTTGGCTACATCCGCCCCTAATAAAAAAATAAAAA
                     ATAAAAAGGATTTCCACTTATAATTTCTAGCATTTACTGCTCAATGGAAAAAAAAAGA
                     CAAAATAAACAAGTGAAAGCTTTATCTTTTATATCTTTATCTTTCATTTTCCATTTTT
                     AAACTTAAAATAAGAAGTATATAAATTAAAAAAGAGTACTATAATATACTGTAATACT
                     CAATCCTAAATCAACTCAAAAAAAAGTTCTTCTTATGATTAGGTTAAAGAAAGATAAA
                     AGATAAATATTATTAAAAAAAGGAGCAACAGCACCTTCTATCAAGAAGGTTGCTATTG
                     CTCCTTTTTTTTTTCAAAAACTCATATACAATAAGACCGAAGTCTTATCCATTTGTAG
                     ATGGAACTTCAACAGCAGCTAAATCTAGAGGGAAGTTATGAGCATTACGTTCATGCAT
                     AACTTCCATACCAAGGTTAGCACGGTTAATAATATCAGCCCAAGTATTAATTACACGA
                     CCTTGACTATCAACTACAGATTGGTTGAAATTGAAACCATTTAGGTTGAAAGCCATAG
                     TGCTAATACCTAAAGAAGTGAACCAGATACCTACTACAGGCCAAGCAGCTAGGAAGAA
                     ATGTAAAGAACGAGAGTTATTGAAACTAGCATATTGGAAGATTAATCGGCCAAAATAA
                     CCATGAGCAGCTACGATATTATAAGTTTCTTCCTCTTGACCGAATCTGTAACCTTCAT
                     TGGCAGATTCATTTTCTGTAGTTTCCCTGATCAAACTAGAAGTTACCAAAGAACCATG
                     CATAGCACTGAATAGGGAGCCGCCGAATACACCAGCTACGCCTAACATGTGAAATGGG
                     TGCATAAGGATGTTGTGCTCAGCCTGGAATACAATCATAAAGTTGAAAGTACCAGAAA
                     TTCCTAAAGGCATACCATCAGAAAAGCTTCCTTGACCAATTGGGTAGATCAAGAAAAC
                     TGCAGTAGCAGCTGCAACAGGAGCTGAATATGCAACAGCAATCCAAGGACGCATACCC
                     AGACGGAAACTAAGTTCCCACTCACGACCCATGTAACAAGCTACACCAAGTAAGAAAT
                     GTAGAACAATTAACTCATAAGGACCACCATTATATAACCATTCATCAACAGATGCGGC
                     TTCCCATATTGGGTAAAAGTGCAAACCTATAGCCGCAGAAGTCGGAATAATGGCACCA
                     GAAATAATATTGTTTCCGTAAAGTAGAGATCCAGAAACAGGTTCACGAATACCATCAA
                     TATCCACTGGAGGGGCAGCAATGAAAGCGATAATAAACACAGAAGTTGCGGTCAATAA
                     AGTAGGGATCATCAAAACACCAAACCATCCAATGTAAAGACGGTTTTCAGTGCTGGTT
                     ATCCAGTTACAGAAGCGACCCCATAGGCTCTCGCTTTCGCGTCTCTCTAAAATTGCAG
                     TCATGGTAAAATCTTGGTTTATTTAATCATCAGGGACTCCCAAGTACACGAATTCTCT
                     ATAAATAGAAATAGATAATTGAGGACTTGTTATTCAACAGTATAACATGACTTATATA
                     CCCATGTCAACCAATATATCAACATCCATGGATATATCTTTATGATATTATCTATCTA
                     GATTATCAGAATCTTTTTGAATAAATGAAGTTGAAGTAAGTCAAATAAGATATTCAGA
                     TTTAGAGAATATACTATTTAGAGAATATACTCTATTAGAGAATATACTATAGAATTTC
                     ATATGATTCTAATATGATAATAATGGGTTGCCCGGGACTCGAACCCGGAACTAGTCGG
                     ATGGAGTAGATAATTTCCTTGTTAAAAAAAAAAAAATTAAGTAAAAAACCTCTCCCCA
                     AACCGTACTTGCATTTTTCATTGCACACGGCTTTCCCTATGCATACGTCTAAAACTCA
                     GTTCGCTTCCTAGACAAAACTTCTAAGAAAGTTGAATACTCAGTTGTTCAATCCTTAC
                     TCGTATACTGCATGAGCATTTCATAATAGAAATGAATGAATTTTTTTGGTATCCCTTC
                     ATCATTTAGGAATAATTTCGATTTACATGTTTTCATAACCAATTATTCGTAATTGGCC
                     AGATCATGGATACAAATAATATCCAAATACCAAACCCGTCCTCTATATAACTTTCGTA
                     AAATAGAAAAAGTTCTCGGGAAGATCAAAGAAAGAATATCTTCTTCCTCCATAAAAAA
                     TTCTTCCAATAACCCCGAACCTAATCTTTTCAAAAAAGCGCGTACAGTACTTTTGTGT
                     TTACGCGCCAAAGTTTTAACACAAGAGAGCCGAAGTATATATTTTATTCGATACAAAC
                     TCTTTTTTTTTGAAGATCCGCTATAATAATGAGAAAGGTTTTTACTGATATGCAGAAA
                     CCGGTCGATAATATCAGAATCCGATGAACCAGCCCGGGTCGGATTACTAATGGGATGT
                     CCTACTGTGTTACAAAATTTCATTTTTTCCAAGGATCCAATCAACGGAACGATTGGAA
                     CTATTGTATCGAGTTTTTTCATAGTATTATCTATTAGAAATGAATTTTCTAGCATTTG
                     GCTCCGTACCACTGAAGGCTTTAGTCGTATACTTGAAAGATAACCCAAAAAGTCGATA
                     GACTGCTTGGATAATAGATTTATATAGATCTTTTCTGGCTGAAACCACACATAAAAAT
                     AACATTGGCATAAATTGATAAAATAATATTTCCATTTTTTCATCAGAAGAGGCGTATC
                     CTTTGAAGCCAGAATGGATTTTCCTTGATATCTAACATAATGTATGAAAGAATCCTTG
                     AACAAGTCTAGGATGGCCTGAAAATCATTAACACAGACTTCTGCAAAATGTTCTATTT
                     TTCCATAGAAATCTATTCGTTCAAGAAGAACCCAAGAAAATGTTGATCGTAAATAAAA
                     AGATTTGTTACGGAGAAAAAAGAAGATGTATTCATATTCATATACATGAGAATTATAT
                     AGGAACAAGAAAAATCTTGAATTTGTTTTTGCAAAAACGGAAATGGATTTCTTTGAAA
                     TAAGAAGACTGGTCCAATTCCAATACTCGTGAAGAAAGAGTCGTAATAAATGTAAGGG
                     AGAAGGATCTTTTACCGAGTAGCGAAGAGTTTGAACCAATTTTTCTATATGGATGGGG
                     TAAGGTATTAGTCCATCTGACACATAATTTAAATGTGGAATTTTGTCCTCTAAAAAAG
                     GAAATATTAAATGAATAGATCGTAAATTCTGAGATTTTACTATTTTTGACCTTTCTAA
                     AGAGAATACTAATCGTAGGGAAAATGGAATTTCCACAATGACCGCAAACCCTTCTGAT
                     ATCATTTGAGAATAAAAGTTATTATTGTACCTAATAAATCGATTTTGGTTAGAACCAT
                     TAGCAAAAATAATCAAATGATTCTGTTGATACATTCGAGTAATTACACGTTTTACAAT
                     TAGTAAATTAAATTTATTGTAATAACCTACATTTTCCAACAAAATAGATCTATTTAAA
                     CCATGATCATAAGCAAGTGTATAAATATACTCCCGAAAGATAAGTGGGTATAAGAAGT
                     CATTTTTTCGAGATCTATCTAGTTCTAAATATCTTTGATACGCCTCCATTTTCAGTTT
                     CAATTCGATTTGATTGAAGCAAGGATAGGGGATTTATTGGGTTATTAAATGATACATA
                     GTGCGATACAGTAAAAACAAAGTAGTATAATAAGAATAGATACCTCGAAAAGGGTAAA
                     CTCATCAATGACTCTCTAGCCTATCTTTCTTTCATCTAATTTTTTTATTTATTATAGC
                     AATGGTTAGAAATCCTTTACTTTTTCAAGCCAATCGCTCTTTTGATTTTGGCACAAAT
                     CCCTTTATCAATATACTCTTTCTTCTACACATTTTTCTCCCCCTCATAATGGAGAATA
                     GCTAATAGTTAGGACTCATTAAAAAAAAATCTGCTCATGGAAAGTCCTTTCTCACATC
                     AGACACTAATAATTTTTAACGGCTAATTAGATCGGATAATCATTCAAATTAAGAACGT
                     AAGCTCGTTACTTTTTGTTTCCCTATAATTTGAGCCATAGTGCCCTATCCATTTATTT
                     ACTTGACCCAACTTTGAATTCATTTTTTATCTTTCGCACCAACAATTTTGGGATCCAT
                     CCGGTAAGGGTAAGAACGAAATATTCTCAGAATTCTCCATTGATACGACATGCTTTTT
                     TTTCCACTCATTCCTTTCAGGATCAGTCGTGGTCTTACAAACTATACTGATGATATGG
                     ACGAAGCCCTTTCTTCATACAAATGCGTAAAAGATGTTAGTCGCACTTAAAAGCCGAG
                     TACTCTACCATTGAGTTAGCAACCCCCAATACCCCCCCCCAAAAAAAAATTAGGTTAT
                     GTAGATACAATCGGGATTAAGATAAATAAAGAGATTAAGTCACATGATAGAATCAAAA
                     CATTAAACTAGCAAGAAATGACCAAGAAAAAAAGAAATAAAATCTAAAAATTTCTAAT
                     CAATTCTGAACATAAAAAAAAAAGAAATAATTGATTAACTGAAAATCGAAGAAATTCT
                     CAAATAAATATAAATCAAATAAAAATATAGATAAAGTAAAAATGGAATGCCCATTCCT
                     TGTCTTTTATGCAAGTCATTCTTTATTATATTTAGATTATATTTAGGTATTCTATTTT
                     ATAGATTTTATATTTTATTTAATTTATTATATATAATAGATTCTATTATCTTATGCAT
                     TTTTTCTATAACAATACTTTTTTATCTTTATATATAAAATTTTTTTATAGATATAGAT
                     TTTTTTCAATAAAAAAAAGACTTTTGTATCACGGAAAATCCAACAAATTTATCATTTG
                     AATGAAAATGAAGAAAAAAACAAGAAAACCTATAGAACTGCGATAAATAGATCCATGA
                     ATAAGATCCAGTTACCCAGATCGGATTGTATTTATTTGATACACTGTTGTCAATAGGA
                     ATGTGTTGAGAAAAAAATAAACAATGGATAAAAAAAAGAATTAATTCAATTTCAATAA
                     AATATATATATATAATAAATAAATTTCCTAATTTACATTTTAAAAATTTCATATTTAT
                     TAAAAAAACTTCTAATCTAATAGTTAGAATAAAAACTAAGGACTTGTATTGGATTGGC
                     ACTTTATAGAGAATATCCGCATAAATAGAAACAAAAAAGCTCTGGGTAGAAGAATAAA
                     TTAAAGAAGAATTAGGAAAAAATTCTCGGGTTTATTTTATACAATCAATATAAATCAA
                     TATAAATAAACTAAGAATAAATAAACTAAGACAGGATAATCTCTTTTTTTATTTGTTA
                     ATAGAGTTCCAGCGAAAACCAACTCATTGAAAGTAATGTTAACGAAAACCAACTCATT
                     GAAAATAATGGTAAACTTTTTTATTTCGAAACCAAATTACTTTATTTATATTCACTTG
                     ATTTTTTCTATCCATCTTAATTTTAGATCAATTTCTAGCCAATCACTTCAATTTATAT
                     CAAGAAGATTAAAATATAAGTCTGAATAGAGAAAGAAAAGGGATAGTAAAAAAAGGGT
                     TATACTAAACTGGATATGTATATGAGTTACCAACATTGGTATTTCATTAAGTAAATTG
                     TCTTTGATTAAAGCGAAGTTCTGTAAAAAACCCCGCCTTCTTAAAAATATCATGAACA
                     GTTCCTGTGGGTTGAGCGCTTTTTTCAAGGAAATAAAGAATAGCAGGAACATTAAAAT
                     AAGTTTGATTTTTTATCGGATCATAAAAACCCACTTTCCGAAGATCTCTTCCTTCCCT
                     TCGCGATCGAACATCAATTGCAACGATTCGATAAACAACTCATTGGGATATAGGTAGA
                     TAACCCCCCTAGAAAGGTATAAGAAGTTTTCTTCTCGTACGACTCTAGAAAAATGATT
                     CGAAGTTCTCGCTATGTATAAAATTAGAATGTCAAATAGATCCATAAAATCATCAAAT
                     CAATTAGATTCTGTTTAAATCTTTTTTTTTGGCAAAAAAAATCATTCGTACCTCCTTA
                     ACTCAAGTTGGATAACTTTCACGTAGCTCAAACGAGACTCTTGAAGCATTTCATGTAT
                     TGAGCGATCTCTAATCCCTTTTCTTTTTGTTTGTCTCCCTTAGGATCTATTTTAATTC
                     TTTACTCTGATTTAATATTGTTGAAACAATTGAAAAGGATATTTGCTTGTTCCAGGAT
                     TTTTTATCTTTGCACTGACTCATTAGGTTTAGACATTAGTTCGGTGATCTTTAATCGT
                     TTCAAAATGGCAGCATACCCCTTTTTTCGATTTCTTTCTATCAAAGAATCAAACTAAA
                     GATTGATTCCTGCATAATACACTTTTTTTGATCAAAAGAATTTTGCCAATTCCAACAA
                     ATTTGAGTCTTGGATTTGAAACTTGCTCGAATTAGACCCTTCCAATATCGAAAATAGA
                     CTTACGAAGTTGTTCCAACTTATTGATTGGCACTAACCACCTTAGATTCTTGCCCTAA
                     GAAAAAATCAATACTTTCTGCTCGAACTCCCTCACGTACTATTTACATTATAACCCAA
                     CAAAAGGAAGGGTGATAATGTATAACAGAACAAACAATGTCGAGCCAAGAACACCTTT
                     ATTCCTCTATACTATCTAATAGGTATTCCTCTATACTATCTAATAGGGCGGATGTAAG
                     AATCCACAACCGATCATGTCTTTCAAGTCACACCTTACTTTCTACCACATCGTTTCAA
                     ACAAAGTTTTACCATAACATTCCTTGAGTTTTGAACCAGTATGCAATTGATTCAATTA
                     TGAAATCGTGAATAGTCATTGGCTCGGCCGGTATATAGTAATCTAGATTTTTAACTTC
                     TATCAGGTAGGAAAAAAAAGTAGAAGGAGTTCAATTTAATCCCTTTTTTATTATAATT
                     ATATGAATTATAGAAATATCTTTTGATTTATAATAAGACGAAGAGATAAGGTCTTTGA
                     AAATCTTCATCTTATTGTGACTCAATACGATGGATTCGCCAATCTCCCAAGCCTTTGA
                     GTGCCAAAACAAAAACTTATAAAAAATCATTAAAAAGATTTAATTGAAAAATTGACCA
                     TTTTGATCTCATTATTTGATCATTATTTGAATACAATTTTACAGTAAGAATCACATTT
                     TATCATCATAAGAGAGATGAATCCCCCCATTCAGATTCGGATTAAATCATCAACTATT
                     TAAAACAAATAGATAGAAATTTATTTTCTTGTTTTTTTTTTTAGTGGAGTCATGTATA
                     AAAGGACTGATGTAAAGAAAGCCTTAAGTTCGTATTCTTTTATACTGATTGATAAAAT
                     AAGAATCGAAATATTAAGCTGTCTCTATAGCTATCAAATCCATTAGATAGATTAAACA
                     ATTTTCATTGGAATTAATTATGAATATTTAATGGTAAATCTTTACCATTAACTAAGGG
                     TAGATAGATTCATAATTTTTCATTAAAGGCAAAAGACATAATATCTGAAAACCAAGGT
                     TAGTTAAAAGAAAATCCAGGTGTTACATATCTAATTTCTTTGTTTGATAATGAGATTT
                     GAGCAAACACAGGCATTGAAATTGATATCTTCCATTGTCAATTAATTCCTATCAACTT
                     CCCAAATTATATGGAGGATATAAATCCAACAAGTAACAAGGAAGGTTCCTATCTTATT
                     CTTATTAGACGCGAGATTCTATAGGTACAAAGCAAAAAAAGTCTAGATAAAAAGGTCT
                     AGATTAAGTCATTGTTTCCTATTTTTTTTACCCTAAATCGGCTTAAGATACTTATGAT
                     TGAATTAAAAATATGCATCATTGAAATTTCAAATACGTGTGGGATGTAAGACTTTTAT
                     TTTCTAAATAACTAACGTAAATATGAAGAAGATAAAGATATGATGAAAAGCCCGTCTG
                     GCTTTTTTGAATTCAAATTCTTTTGATCTATGGTTCCATCTTTCCTGAAAAAAAAACT
                     AGATTAAATTCCATCTACGTATTATTTTAATACGATAAAATTTGTGAAAAAGATATGA
                     TTCTGAAAAAAGTCATTAAAAATTTAGAAAAATTGAGAATTGCATTTATTATACTCGT
                     ACTAAAATGGAAGGTTATTCAAAAAGGCAATCTTTGAATTTGAATAGGTATACTCTGG
                     GACGGAAGGATTCGAACCTCCGAATAGCGGGACCAAAACCCGTTGCCTTACCACTTGG
                     CCACGCCCCATTTATATTTCTATTCAACACTAATAAAAACGAATATTGGTTCTTCGTC
                     AATTCTCGCCAAAATATCTATATCTCTGACATATATTAGCTTGTTATTCAGATTTGAA
                     TATGTGGAGATATAGAATTAAACTGAATTTATTGATCATAATATATAATTCAATTAAG
                     ATATTGTATGAAAATATGATTGTTTCTATTCTTTTTTGATTTGAGAATTGGAGGATTT
                     TTGATTGGGTGAGTTTAAAGAAGAGTTTTTTGTCTACCTTACTTGATTTTATATCCAT
                     TTTATATCAAAAATATATTACTAACTCATTCAAAATACAATTATATTATCTTCAAGAA
                     CAAAAAGTTTCTTATGCTTAATATTTTTAGTTTGATTTTTATCTGTCTTAATTCTGCC
                     CTTTATTCAAGCAGTTTTTTCTTCACAAAATTGCCCGAAGCCTACGCTTTTTTGAACC
                     CAATCGTAGATGTTATGCCAGTAATCCCTGTGCTCTTTTTTCTACTAGCCTTTGTTTG
                     GCAAGCTGCTGTAAGTTTTCGATGAAATCTTTAAGACTGTCCTAGAAAAATTCATGAT
                     TTATTCAAAAATCAAACTCTATCAATTGATAAGATTAGATAAGTCTTATAGCATAAGC
                     CCTCAATTCAAACATTGAATTTATTGTATAGACGCGACAAAGCTGGATCAACTCATTT
                     CCTCATTCTGAATTTTTATTACAAATGAATTTATAAAATAAAAATTCTTTTTGATTTC
                     TAGAAATCATTTCTTGGTATCAAAATAGGATATATGGTATAAAAATAGAGAATCTATT
                     TCCTTTTTTTTCCAAACCAAAAAAGATCTTGGAGATTGTATAATGCTTACTCTCAAAC
                     TTTTTGTTTATACAGTAGTGATATTCTTTGTTTCTCTCTTTATCTTCGGATTTTTATC
                     TAATGATCCAGGTCGTAATCCTGGGCGTGAAGAATAAGAAGAATAAAAAGTAAGGGTT
                     TTCTTTCCTTGCTTTAGTTTTTTTTTAAGTAAATATTCTTAGCATTTTATCTATTCTA
                     GATTATCTATTCTATCTATTTAACTCTGTAAATAAAGCATAAAACAAAAAGGTTCAAG
                     AAATTTGAAAGATAAAAAAAACACAAAATCATCCATCAACGGAACCGGAAAGAGAGGG
                     ATTCGAACCCTCGGTACGAATAACTCGTACAGCGGATTAGCAATCCGACGCTTTAGTC
                     CACTCAGCCATCTCTCCTAATTGAAAAAGGCTAATTACTATACTTACATTACACAACA
                     GGTAAGGCTTGAAAAAAGCCTTTCATTTTTATCTTTCTTGATTCCTTTCGTTCGTAAT
                     TGCTTTATTTCGTTATAACTTTTTTTTTTAATAGTTTTATTTAATTTTAAAAAAGATT
                     ACTATATGAAAAAATATGAAAAAGTTTTAAAAGGAGGTTTAGTATAAAAATAAAAGGT
                     TTAGTATATAACATATTTAGTATAATAATATACAACAAAAATATACGTATATATAAAA
                     CTTACATCAGCAATTCTCCCAATTTCATTTAGATAATTTCATTTATAGAAAGTAAAGG
                     TTATAAAACTAAAAAGGCATCTCCAACTCAATATTCCAATCAACCAATCAATATATAT
                     TAATCAAGATTATTTCTATATATTGTATCTATATTTTGTATATTGATTGATATATAAT
                     ATTATCAATAGATTATAATTATCTATTTTTTTATATATTTTAATATTTTAAATTAATA
                     ATTAATAAAAAAATAGAAAATATTTATAAAATATTACCTTTTAAGATTACCTTTTTTT
                     TTTCAATTTCGTCCAAATTGGTCCGAAAAACCCTTTTTCCACGGCCTACCCCGTGATA
                     TAGATAAAATTCTTTTTTTTTATATTTGAATATTTGATTCGAAAGGAAAAATAATGTT
                     TGTTACTGAACGAACAACAACGAGAAGGGGGATTTTTTCCGTTTCTATGATATAGGAT
                     CAAATGATATAGAATCATTGAATCCTTTTTTCCTAATCTCATTAGGCCCCCTGAAGAA
                     ATACACTACGCCAACGCGCTAATTTTTAGAATTCAATCCTATTTTGCCCGATTTTCTT
                     ACTCGACAAAAGGGTTCTTTATATATAATAATGACATCATAGCGGGTATAGTTTAGTG
                     GTAAAAGTGTGATTCGCTCTATTATAATAGTTAAGGGATCCCTCGGCTCAGATTCCAA
                     TCAAAAACTTTATTTCTTAAAAGGATTGAATCCTTTACCTCTCAATGAGAAATAGAAA
                     TTCGAGGAAGAAGATACATTCTCGTGATTTGTATCCAAGAGTCAATTAGAAATTGAAA
                     ATTGGATTATGAGATTGCGAAACATAATGTTTTTGAATTGGATCCATACTTCCAATTG
                     AATGAGTATGATTAAAGGATCTATGGATAAACATAGAAAAGTACATATTTCTAATCGT
                     AACTAAACCTTCAATTTTTTTTTGTTTTGTATAGTCGAGATTGAAGCAAAAAAGTAAT
                     AAATGATGACTTTGGTTTACTATAGACATCGACATCTTGTTTTATCTCGGTGGAAACA
                     AAATGCTTTTCCTAAGGATTCTCCCAAATAGAAATAGAGAACGAAGTAACTAGAAAGA
                     TTATTAAAATCCCACTCGTCTAGAGGGATCATCTAGAAAGCGCGTTGTTTTGAATGCA
                     TTAAGACAGCATTAAGATAGAAAGGCTGACATAGATGTTATGGGTTGAATTGAATTCT
                     TTTTCACTTACATCTTATAGCAGGAAATTTGTCCATATTCCATAAAGGAGCCGAATGA
                     AATCAAAGTTTCATGTTCGGTTTTGAATTAGAGACGTTAAAGATGATGAATCAACGTC
                     GACTATAACCCCTAGCCTTCCAAGCTAACGATGCGGGTTCGATTCCCGCTACCCGCTA
                     TGCTATATACTATGCTATATATATAATCTATATACGGTATTATAGAAAATAGATTTAT
                     ATAGATTTATTTAGTAGATTTATTTAGATATTTATTTAGTATATTATTATCTATTTAG
                     TAGACTGCTATTTATTTATTAGACTATTAAAAGTCTATATTATATAGAGAATATAGAT
                     ATTAAATTAGCATATTCAAATTATAGTCTATGTCTTTAATATGTAGAGGTAGAATTTT
                     AATAAATTCTACATATCTATAGAGATATAGAGAGAGTTCTTTTATTTTTATAGTATGT
                     ACTATATATGGATAGGCTCTCTATCGATAGGCTATATAGATATTATCTATAATATCTA
                     TTATCTATAATACTATTATCTAGACTAATAGAATATTAACATTTAATATAATTATTTC
                     ATTATTTACTGAAATTGAAATATAAAATTCCATTTTTTTTTCTCGCATATATATATTT
                     TTTATTTTTATGAAGAAAAAGGGTGAAAGAAAAAAAGAAAAGAAAAAATTTTAGTGGA
                     AGAGCGTCCATTGTCTAATGGATAGGACAGAGGTCTTCTAAACCTTTGGTATAGGTTC
                     AAATCCTATTGGACGCAATTTTTTTCCACATATAATATTCTTAGGATCTATTTTTACC
                     GATTCTAAAAATAATTTGAATAAAAAATGATCATACTTATTATTAACAATGGTATTTC
                     AATTTTTAAGTATTCTAGATTTAGAGTTAATCAAGTTCTTTATATTTGTTCCTGAAGT
                     AGAAACCGTTTTATCTGTTCCTGAATAGCCTCTTTCAATAAGGCTTCTGCTTCTTCGG
                     TGAATGTTTTGGTAGAAGATATGATTTCTTGAAACTGAGGTTTGTTCGTTTTCAAATA
                     AGTACGTAACTCAACCAGAAATTTCCTTACTTGTCCAATTTCTAATGTATCAAGATAA
                     CCATTCGTTCCGGTATAAATAGTCATTATTTGTTCCTCCACCGTGAGAGGAGCTGATT
                     GGGATTGTTTGAGTAACTCACGTAATCGTTGACCTCTTGCCAATTGATTCTGAGTAGC
                     TTTATCGAGATCAGAAGCGAATTGCGCAAAGGCTTCTAATTCTGCGAATTGTGCCAAT
                     TCCAATTTTAATTTACCAGCTACTTGTTTCATAGCTTTAATTTGAGCTGCAGATCCTA
                     CTCTAGAGACAGAAATACCCACATTAATAGCAGGCCTGATTCCAGCATTGAATAGATC
                     GGCGGATAAGAATATTTGTCCATCTGTAATCGAAATCACATTAGTAGGAATATAAGCT
                     GAAACGTCTCCCGATTGGGTTTCGACTATTGGTAAAGCAGTCATACTTCCTTCGCCTA
                     AACGAGAACTTGATTTAGCGGCTCTTTCCAAAAGACGTGAATGCAAATAAAAAACATC
                     GCCTGGATAAGCTTCACGCCCAGGTGGTCTTCGTAATAGAAGAGACATTTGGCGATAC
                     GCCTGCGCTTGTTTGGAGAGATCATCATAAATGATTAAAGTGTGTCGTTCACGGTACA
                     TAAAATATTCAGCCAGAGCAGCTCCTGTGTAAGGGGCGAGATATTGTAATGTAGCCGG
                     AGAATCTGCCGTTTCGGCTACTACAATAGTGTATTCCATTGCCCCTCTTTCTTGTAAA
                     GTAGTCACTACTTGAGCCACAGAAGATGCTTTTTGACCAATAGCTACATAAACACATA
                     TTACATTTTGCCCTTGTTGATTGAGAATTGTATCTGTGGCTACTGCTGTTTTACCGGT
                     CTGTCTATCCCCAATAATTAATTCTCGCTGACCGCGTCCTATAGGTATCATCGAATCA
                     ATAGCAATAAGTCCTGTTTGAAGAGGTTCATATACGGAACGTCTCGAAATAATACCTG
                     GGGCGGGCGATTCAATTAACCGAGATTCAGAAGCTGAAATATCCCCTCGACCATCAAT
                     AGGTTTAGCCAGGGCATTTATAACACGACCCAAATAAGCCTCACTCACCGGTATCTGA
                     GCAATTCTTCCTGTTGCTTTTACAGAGCTTCCCTCTTGTATCATCAAACCATCACCCA
                     TTAATACAACACCAACATTATTTGATTCCAAATTCAGAGCAATGCCTATTGTACCCTC
                     TTCAAATTCTACTAATTCACCTGCCATTACTTCATCAAGACCATAAATACGAGCAATG
                     CCGTCGCCTACTTGAAGTACAGTACCCGTATTTACAATCTTCACTTCCCTATTATATT
                     GCTCAATACGTTCACGGATAATATTACTAATCTCGTCGGCTCGAATGGTTACCATGAT
                     CTTAATTTTTTTGGGGGGGGAAATAATGCCTACAGTAGAAAGACTAATCAGTTATTTC
                     TTTCATCGAGCCAAACATGCCAATATTAGCACTGATGGTACGTAAATGTAACTCGTTG
                     GTCAAACAACTATTCAAAGTCCCTATAGCCCCTTGTAAGGCTTGTTGGAAAACACGTT
                     GTCGAACTTGATTGATCGCTCTTTGCTCTTCAAAACGAATGGTTTCATTTTTGTAATT
                     CTCTAATTGTTCCAAAGTCTTATAAGTTGAATTAATCAAATTGAATTTTTCTCGTTCT
                     ATCTCCGAGTATCCGCTCGCTCGAAACTGATCTGCTTCTATTTCCACTTTCCGTAAGC
                     GCGCCCGGGCTTTTTCTAGCTGTTCAATGGCTCCCTCGCGTAGTTCTTCTGAATTTCG
                     AATAGTATTCAAAATCCTTTGTTTTCGATTATCTAATAAATCACTTAATGAAAGTAGA
                     TTATCTTTCCATTCATTGTAAAACTTCTATGATCCCTTCCCGAACCAAACATGAATCT
                     TTCAATTCATTTGGCTCTCACGCTCAATTATTTCAATTACTTATGGGAAATTCCCATA
                     TCTTTTTTGACTAGAATGAGCCTATCCTCCCCTCTTTATTCATAATTCATATTCCAAA
                     ATATCGAAACCAATCACTAATCCAAGCCCGAAATATTCGGAGGACTCTTCTGACCAAA
                     CAAGTACTTGTCAGTAAAGTTGTTTTTTTTCTTCAAATCCAAAAAATAGACTTTATTG
                     CATAGGTTATCAATTGGGCATTAGATAAGAATGGTTGAAATACGCATTTTTCAAAAAA
                     AAGGTTCAAATCATTTTTTCGATATGAGTGTTCTATACCGAAAACGATTTCCAAGTAT
                     TCATTTTGAACCCATTTATGTACTAACATAATAGTAGAAAGAGTACCTTGCTACATTT
                     GGACTTCAAACAATTTAGCTTTAACCATATTAATGGTCCTACGTTATTGGTTGATAGA
                     GAATCAAAGTTTATTTACCAATGAATCGCGAAATGCTATGGTTCTTAAAGATGATTTC
                     TTAATTTATTCAGAAGTAATTCGCAGGATCATGCACTTTTGTTTTCCTAGTTAAAACG
                     AAAAAAAGTGCAGCCGGTTCAATCCAGCCTATTCTTGAAATAAACAACTCGCACACAC
                     TCCCTTTCCAAAAAAAATCAATAGACCAAGGACTACACTTAGATTTATTGGATTTGTT
                     GCTAAAATATCGGTATTAAACCCGAAACTCCCGGCGGAAGGCCAGTGCCCCAAGGAAA
                     GGAAAGAATCGGTTACATTTTTCATAGGATCTCCTATTCTCTTATAGACAGAGTAATT
                     ATCGATTTGTTGTTCTTATTCTATATGTTTTTCTTCTATATATTTTTCATATTCTTCC
                     ATATTTTAATGTATATATTTTAAAAATATAATAAAATTATATTTTATAATAAAATAAA
                     TAGTTTTTTTTTAAATTATAAAATAAAATGTATAAAACTACTAAAACAACTTTTATAA
                     ATTTTAATTTATAATAAACTTACTTTAACCAACTCAACATCATTAGCCATTGCAGCAG
                     TATGCAAAGCTGTTCTTCCATGCTGAGTATCCTGGGCCCTTGGATCTGCTCCAGCAGC
                     AAGCAACATTTGCACTAGGTCCCTCCCCTCTATGAATGCACAAAAAACCAAAACAATG
                     AACAGATGAAAGGATAGTGATGGGGGAGCTTATGGCCCAGAGACATGGTTGACACAAA
                     GTGACATAATTTATACATATAATAGACTGAAGAGAGGATGTTGATTAAAAATATGGGA
                     CAATCAATTGAATATAGCAATCATTTTGAAAACAGAAAAGACAAAGCCCAATCTTTAA
                     TTACCAGTTTCATGATCTTTCTTTGCAGCAGCTGCCATACACAGTGCGGTCCCATCTG
                     GGCTTGGTACATCAATTGCATCTTCAATTTCTTCTACAGAAGCAACTTCCACCCATTT
                     TTTCACAACAGCCACATTCCACGTTGCTACACACAAGTGCAGTGGTCTGTGACAAAAG
                     AAGATTAAGATGTGCAATAAAATTTCAGAAAATAAGACCAATAGAAAACACAAAAAGA
                     ACATGAAGATCTTACTATGAAAATTCTTTATCTAAATAAAATAAAATCATTCTATTGC
                     AAAATCATTAAATTACTACATGAAATTAAATAATAAAACAAAATTTCCAAATCAATAA
                     AAATAACAACTATTATTATATTTAATGCATGTGGAAACCTACAATAGTTAAAGTAATA
                     TCTCTAAATAATGTCAATATATGCAACATTTAAAAATACTAAAAAAAGTCAAAAATTT
                     ATAGGTAAAGATTCTTAAATTAAAAAACTACATTAAAATTAAAAAAAAAATAAAAATT
                     AATAAATATAGAATAATATAAAAAAAAAATAATTATACAATAAAATAAAAAATACAAT
                     ATAGATGACACTCTTTATACATGATACTTACTGCGGCAAGACTGTACTTGTCCCTCAA
                     GAACTTGCACAGAGCCAACATTAAGGCTGTTAAACAAAAAAGAGAGAAATAAGATAAG
                     AGAAGGTATTCCTCCATTCATCTTAACTGCTTGAACTTAACTACATAAAACGTCGTCA
                     GCAAATTCACAAAGTTTTCAATCCAAAATGCCTGGTGGACACACTAGATGTCAAATAT
                     GTGTATGTATTACTTTAAAAATTTACTTTGGAGGAAGGTCAAAAAATAAAATCTCCTG
                     ATGCTAATTGTTCTTTTGTCTCTAGTCTTCATACTCGGTCTCCTCATCGTCATCGTCA
                     TTGTTTTCTCCGTATCTCCATCCATCCTCGGCATTGTCACGATCTTCCTCCTCTGTTT
                     CTTCACTATCTTCTTCGTAGTTTTCTTCCTTCTGCCAAGGCATCTTTGCCACAGTAAC
                     AAATGAAGGGGATGGGCTCGAACCTTTGCGTTGAATAATTTTAGCAGGAGGCTGCTTC
                     AAATTTGGCTTGGGTCTGCTCTGTTTGTGGGCTTTCCCGTTGACTCGTTTTGCAGTAT
                     AAGCATCTTGATCACTGGTTTGATCCACCTCGTTGTCAGCATTACGAGGGACATTCTC
                     AACATTCTCATCATGGCCAGGATGCTCTCGTTTCAGATGAAGTTTGAGCTTGTAACTG
                     TGCATGTATGCCTTCCCACACCATCCATAAGGACAAACATGAGGACGGTCTGATGATG
                     CAGAACCATATGTCCCAGAAGAAGACTTTGGAATTTTAGGTGCCTTTTCTGGAGGTGT
                     AGCATATTTTGGCATGTCTATAGTCGGTGTTGGATTCTGCAGAATTTACAAATGCTCC
                     ACAAATCAGCTCCAAATTCTAATACAAGGGCAAATAGTACATGAAGATACTGTAATTC
                     GAACTAACAATACCGTTCAAAGTTAAACAAGGAGGAGATGGTTTTTCCTTTAAGGAGA
                     CATGAAGGACAACAACTAACCTTCTCATGATGAGATGTGATATGGTTCTTCAGCTTGT
                     ACTCATGAGCATACCGCTTTCCACATTCTGGATACGGACAGATATGATAGTTTTCTTG
                     TGAATGTGTCTTCATATGGGACTTCAGGTTAAAATCCAGGGAGAATGCCTGTAATTCC
                     ATGGATAAAATTTGAAGAAACATTAATATCCCACAAAAATAAATAAATAAATAGCAAG
                     GAAACATCTCAACACAACATAAGATCATGTTGTATTTATTAATTTTATTAAATGATTT
                     GATAATAGTTAATTGTTAAAAAAAATATAGTTTGATATTAGTAGTCAAATAATTCTTC
                     TTATAAATCAAAATTCCATAACATAGTTTTTTTTCCAGTGCAATAAAGTTACATAGTG
                     TCTATTTTTCGTTGATAAAGGGGTATTTCTATGGGTTTGCCTTGGTATCGTGTTCATA
                     CTGTCGTATTGAATGATCCCGGTCGTTTGCTGTCTGTCCATATAATGCATACAGCTTT
                     GGTTGCTGGTTGGGCCGGTTCGATGGCTCTATATGAATTAGCCGTTTTTGATCCCTCT
                     GACCCTGTTCTTGATCCAATGTGGAGACAGGGTATGTTCGTTATACCCTTCATGACTC
                     GTTTAGGAATAACCAATTCATGGGGTGGTTGGAGTATCACAGGAGGAACTATAACAAA
                     TCCGGGTATTTGGAGTTATGAAGGTGTGGCTGGGGCGCATATTGTCTTTTCGGGCTTG
                     TGCTTCTTGGCAGCTATCTGGCATTGGGTATATTGGGATCTAGAAATCTTTTGTGATG
                     AACGTACCGGAAAACCCTCTTTGGATTTGCCCAAGATCTTTGGAATTCATTTATTTCT
                     ATCAGGGGTGGCTTGTTTTGGGTTTGGCGCTTTTCATGTAACCGGATTGTATGGTCCT
                     GGAATATGGGTGTCTGATCCTTACGGACTAACCGGAAAAGTACAATCTGTAAATCCAG
                     CGTGGGGTGTGGAGGGTTTTGATCCTTTTGTTCCGGGAGGAATAGCCTCTCATCATAT
                     TGCAGCGGGGACGTTGGGCATATTAGCGGGCCTATTTCATCTTAGTGTCCGTCCGCCT
                     CAACGTCTATACAAAGGATTACGTATGGGAAATATTGAAACCGTCCTTTCCAGCAGTA
                     TCGCTGCTGTCTTTTTTGCAGCTTTTGTTGTTGCTGGAACCATGTGGTATGGTTCAGC
                     CACTACCCCCATTGAATTATTTGGTCCGACTCGTTATCAATGGGATCAAGGATACTTC
                     CAGCAAGAAATATATCGAAGAGTTGGCGCTGGGCTAGCCGAAAATCAAAGTTTATCCG
                     AAGCTTGGTCTAAAATTCCTGAAAAATTGGCTTTTTATGATTACATCGGTAATAATCC
                     GGCAAAAGGTGGATTGTTCAGAGCAGGAGCAATGGACAACGGGGATGGAATAGCTGTT
                     GGGTGGTTAGGTCATCCTATCTTTAGAGATAAAGAAGGGCGTGAACTTTTTGTACGTC
                     GTATGCCTACTTTTTTTGAAACATTTCCAGTTGTTTTGGTAGACGGAGACGGAATTGT
                     TAGAGCCGATGTTCCTTTTAGAAGGGCAGAATCGAAGTATAGTGTCGAACAAGTAGGT
                     GTAACTGTTGAGTTTTATGGTGGCGAACTTAATGGAGTTACTTATAGTGACCCTGCTA
                     CTGTGAAAAAATATGCTAGACGTGCTCAATTGGGTGAAATTTTTGAATTAGATCGTTC
                     TACTTTGAAATCGGATGGTGTTTTTCGTAGTAGTCCAAGGGGTTGGTTTACTTTTGGA
                     CATGCTTCGTTTGCTCTTCTCTTCTTCTTTGGACACATTTGGCATGGTGCTCGTACCT
                     TGTTCAGAGATGTTTTTGCCGGCATTGATCCAGATTTAGACGCTCAAGTGGAATTTGG
                     AGCATTCCAAAAATTGGGAGATCCAACTACAAGAAGACAAGTAGTCTGAATTTTATTT
                     TTGTAATTTGACATTTGACATGGGGTACTGGAAACATCTTGATTTGAATAGTCGTCTT
                     TTCCTTGAATCTTGCTCTTTTTTTATCCGGGGGAGGATCCCTAATAAACAGATATGGA
                     AGTTATAATTGTAAACCGCGATCGAATCTATGGAAGCATTGGTTTATACATTCCTCTT
                     AGTCTCGACTCTAGGAATAATTTTTTTCGCTATCTTTTTTCGAGAACCGCCTAAAGTT
                     CCAACTAAAAAGATGAAATGATTTTTTATTATCTTAGTTGAAGTAAAGAGCCTCCCAA
                     TATTGGGAGGCTCTTTACTTCAACTAGTCCCCATGTTCCTCGAATGGATCTCTTAATT
                     GTTGAGAGGGTTGCCCAAAAGCAGTATATAAGGCGTACCCGGTAAAACTTACAAGTAA
                     ACCAGATATAGAGATAGCGACCAGGGTTGCTGTTTCCATTATTATAGAATTTCAAGAC
                     CATAATGGGTCTATGATAAGATGATTTATTTACAACGGAATGGTATACAAAGTCAACA
                     GATCTCAATTAATACAAAATAGGATTTATGGCTACACAAAATGTTGAGAGTAGTTCTA
                     GATCTGGTCCAAGACGAACTATTGTAGGGGATTTATTGAAACCATTGAATTCGGAATA
                     TGGTAAAGTAGCTCCTGGATGGGGAACTACTCCTTTGATGGGTATCGCAATGGCTCTA
                     TTTGCGGTATTCCTATCTATTATTTTAGAGATTTATAATTCTTCCGTTTTACTAGATG
                     GAATTTCAATGAATTAGATGTACAAGGACCGCTAAGTCCTAACTTTTCAATACAAAGT
                     GAAGCGTTTTGGTCTGAGATTTTTTTTAGTCCATTCTATTCTATTTTGGTAGTTCGAT
                     CGTGGAATTTCTCTTTCTTTCTGTATTTTTGGAATATGAGTGTGCGACTTGTTATAAT
                     GGATCCTATTGATAGTACAGAGAATGGACCTGTCATCTTGATATAGATTGTTTTTTAC
                     CTCGTCAGATATTTATTCTAGTATCTGAAGCACGGAATATATGAAATCGATTACGAAG
                     TTTTAGAACTATGATTCATACTTAATGTTCAGATCTTGCGACCCGACTCAAAAAAAAA
                     TTTCAATTCAAAGAGTTAGTTTCAACTCAAAGAGCTAGAAGGTATAAATTCAAAGATT
                     TTTCTTCTTTCAAACGCTTTATCTATGCTTTTTTGATCAAAGGGCAAACCCTTCTGTG
                     GATATTTACCTCAATGTACTTCTTGGCATTATCCCATGCACCACCAGTATTTGATGCA
                     GATATAGCTATCTGTTGGAGACAGGAAGAAGAGAAAGGAGGAAGAGGGGGAGGGGAGA
                     AGAAGAATGAAGGAAGGGGAAACAAAAAAAAAAAAGAGGTGGATCCTCAGAAGTTCAA
                     AGAAACTTGACAAATTTTGAGCTGTAGTGCTATAGACGATTACATACCTGAACACCAG
                     AAACAAGGGAACCAGCCAGAACACCTGAAAGAGTTTCAACACCAAACAAAATTCCAAC
                     AATCAGAGGGGTAAGCATAACAAGAGCACCAGGTGGGATCATCTCCTTGATTGATGCA
                     TCAGTGGAAATCTTGACACAGGTAGCATAATCAGGCTTGGCGCGGCCTTCCATGAGAC
                     CGGGAATAGTATTGAACTGCCTGCGGACCTCTTCAACCATCTTCAAAGCTGCACTTCC
                     CACACTCTTCATGGTCATAGCTGAGAACCAGTATGGAAGCATTGCACCAACTATAAGA
                     CCAATGAAGACCTTCGGAGTAAGGACATCAACTGTAGATACTCCTGCACGGCTCACGA
                     AAGCACCAAATAGTGCCAAGGAAACAAGAGCAGCAGATCCAATAGCGAATCCCTACAA
                     GAAAAGGCCTCATCAATTAAGTACAAGTAGTTAACGGAGGTATTAGTCAAACTTGCAT
                     GAAATCTTCTCCACTTTTGTAAAAGATTGGTAATCATTTTGCGAGATCCTAAAACAGT
                     GAACAATACACCTACATGTTATCAAATGCTGAACTGGTATTCATTAGTTTACCTTTCC
                     AATGGCAGCAGTAGTGTTGCCAGCTGCATCAAGGGCATCAGTTCGCTCACGGATGCGG
                     TGACTCATGCCAGCCATCTCAGCAATGCCTCCAGCATTGTCACTAATCGGACCATACG
                     CATCAATGGCCAAGCCAGTGGCAATGGTACTCAACATTCCAAGAGCAGCCACTGCAAT
                     GCCATACATGGCCGCAAAGCTAAAGCTCACGAAGATGCTAATTGCAATGGCAAAGATA
                     GGAATGATGACAGATTTATATCCCAATGCAAGGCCAAAGATAACATTTGTTGCAGCTC
                     CAGTCCTGCAGGAGTCGGCTACATCTTGCACAGGGCTGCAGACAAGGAATTCACTCTG
                     AGGATTAGTGCTTAAAAGCAACAATGATATAGCTATAGGATTGGATGTACCTGTAAGC
                     GTTGCTTGTAAAATACTCTGTCACAAATCCAATGATAAGACCAGCCCAAAGACCAACA
                     GCAACACACAAGAACAATTGCCTGTAAATGAAAAAAGACATTTCGAGTTGTATGAATA
                     TTTATGTAAGAAAATAGAAGGCACAAGCAACCGAACAACATTGATGCAGAAACAATGC
                     AATCAATATGGCATATCAACTTGCAATAGATATTTACACAAACTGCAGAATGCAAGTA
                     TCTGAATAGTAACCAAATGTAGCATTGCAAAGCCCACATACATTCTTAAAAGGGTAGA
                     ATCACTTTCATCACTGGGCTGAAGAAAAATAAACCACCAGGACATCATGTTGGTGGCC
                     ACTTGAGAAAGATGAAGACTTACCAGTTACGTACAACTTTCTGAGACCCAAAGTTATA
                     AATTGTGAAAGATGATGGAACACTAAGCCAAGTTATAATGGCAATGCCAATAGTCATA
                     AGAACTGTGGAGATGATAAGCTGATACTTCAATTTAGGTTCGATCTCCTTTACAGCCT
                     TGATTTCATTGAAATCAGTAGCAAAGAGTGTTGTAATCACACAGACAATGATGCCCAC
                     AGAGCTAACAAGCAGAGGATAGAGCATGCCGGTGAACTCATGCTCGAATCCAAATGAG
                     GAAATGGATGCAACGACGAGGGCAGCACAAGATGATTCCGCATACGAGCCAAAAAGAT
                     CAGACCCCATCCCAGCAATATCTCCAACATTGTCACCAACATTGTCAGCAATGACCTG
                     TAAAGATATGCAGTTATATCAGGATTCAGAGATGCAAACAAGAACACTAGTCCATGAT
                     GGAAACAGCGCTGCAACACTTACAGCTGGATTTCTTGGATCATCTTCTGGAATGTTCC
                     TCTCAACCTTTCCTACAAGGTCGGCACCAACATCAGCAGCTTTGGTGTAGATACCACC
                     ACCAACCCTCCCGAAAAGAGCCATGGAAGAGCCACCTAAACCATAACCGGTAATAGAC
                     TCAAAAAGCCCTTCCCAATCATCACCATAGTACAGCTTGAACAGATTGATGGCAATGT
                     AAAGAACCAATAGACCGTTAGCAGCAAGGAGAAAACCCATAACAGCACCAGATCTAAA
                     GGCAATAATAAAAGCCTTGCCAACACCCTTTCTTGCTTCCAAAGTTGTTCTTGCATTG
                     GCATAAGTAGCAATTTTCATTCCTAAGAAACCAGAGAGCACTGACGTAATAGCACCAA
                     GCAGAAATGAAATGGTGCTGAACAAAGCAGTAGCAAGTGCTGGCTTGCACTTCTTCTC
                     CGGATCATAAGTACAAGGCTGGCTCTTCATGCTGAAGCCATTGACAGAGCCCAAGAAG
                     AGGAAGATTAGAATTGCAAAGGCAACCATGAAAATCCCAACATACTGGTACTCAGTAA
                     AAAGAAAAGATGTAGCACCTGTTGCATCGCTCATTAAGTCAATACATGAACACAAATA
                     TTAGAGTGTCACAAGTGAATGCTGTTCTCAATACAATCCGAAAAGAAAAGAAGACAAA
                     CACACAT"
ORIGIN      
        1 aatagaaaat actaatacta atataataga tagaatagaa aagaactgtc ttttctttat
       61 actttcgccg gttccgttgc taccgcgtgc tttacgcaat cgatcggatc atatagatat
      121 cccttcaaca caacataggt cgtcgaaagg atctcggaga cccaccaaag cacgaaagcc
      181 aggatctttc agaaaaagga ttcctattcg aagagtgcat aaccgcatgg ataagctcac
      241 actaacccgt caatttggga tccaattcgg gattttcctt gggaggtgtc gggaaggaat
      301 tggaatgtaa taatatcgat tcatacagat atagaagaat ctctattgat tcaaaggctg
      361 tacctatagg cctataggat agggctagcg aaagaggaaa aaaccgaaga tttcacatag
      421 tacttttgat cgaaaaatca atctgattta tttcgtaccc ttcgctcagt gagaaaatgg
      481 gtcagattct acaggatcaa acctatggga cttaaggaat gacggaaggg aataaaaaag
      541 aaataaataa aaatgaagta gaagagccca gattccaaat gaacaaattc aaacttgaaa
      601 aaaatctttc tgattctcga agaatgaggg gcaaagggat tgatcgagaa agatctcttg
      661 ttcttattat aagatcgtga ttggatccac atatgtttgg taaaaagaag aatcttctcc
      721 tttgagaata atcaaaaaaa gaaagtgttc aattggaaca tgaaaacgtg actaaatttg
      781 tcctagttac tcttggggac ggagtggatg aagggaggag cttctcgaac gaggaaaggg
      841 atccaatgac ttcgaaagaa ttgaacgagg agccgtatga ggtgaaaatc tcatgtacgg
      901 ttctgtagag tggcagtaag gatgacttat ctgtcaactt ttccactatt acccccaaaa
      961 aaccaaactc tgccttacgt aaagttgcca gagtacgatt aacctcggga tttgaaatca
     1021 ctgcttatat acccggtatt ggccataatt tacaagagca ttctgtagtc ttagtaagag
     1081 ggggaagggt taaggattta cccggtgtga gatatcacat tgttcgagga accctagatg
     1141 ctgtcggagt aaaggatcgt caacaagggc gttctagtgc gttgtagatt cttatccaag
     1201 acttgtatca tttgatgatg ccatgtgaat cgctagaaac atgtaaagtg tatggctaac
     1261 ccaataacga aagtttcgta aggggactgg agcaggctac catgagacaa aagatcttct
     1321 ttactaaaga gattcggaac tcttatatgt ccaaggtcca atattggaag aatttcagag
     1381 gttttccttg actttgtccg tgtcaacaaa caattcgaaa tgcctcgact tttttagagc
     1441 aggtccgagt caaatagcaa tgattcaaag cacttctttt tacacttttt cggaaaccca
     1501 aggactccat cgtatggata tgtaaaatac aggatttcca atcctagcag gaaaaggagg
     1561 gaaacggata ctcaatttaa agtgagtaaa tagaattcca tactcaatct catagataca
     1621 tatagaattc tgtggaaagc cgtattcgat gaaagtcgta tgtacggctt ggagggaggt
     1681 ctttcatatc tttcgagatc caccctacaa tatggggtca aaaagccaaa ataaatgatt
     1741 ttattagccc ttataaaagg aaaactgatt cttgagaacc ccttgtacgc tcatgtcacg
     1801 tcgaggtact gcagaagaaa aaactgcaaa atccgatcca atttatcgta atcgattagt
     1861 taacatgttg gttaaccgta ttctgaaaca cggaaaaaaa tcattggctt atcaaattat
     1921 ctatcgagcc atgaaaaaga ttcaacaaaa gacagaaaca aatccactat ctgttttacg
     1981 tcaagcaata cgtggagtaa ctcccgatat agcagtaaaa gcaagacgtg taggcggatc
     2041 gactcatcaa gttcccattg aaataggatc cacacaagga aaagcacttg ccattcgttg
     2101 gttattaggg gcatcccgaa aacgtccggg ccgaaatatg gctttcaaat taagttccga
     2161 attagtggat gctgccaaag ggagtggcga tgccatacgc aaaaaggaag agactcatag
     2221 aatggcggag gcaaatagag cttttgcgca ttttcgttaa tccatgaaca ggatctatat
     2281 agactcatgg agccatacat ctcgatcgga aaagaatcaa tagaaaaaga aagaatcgga
     2341 attgatcgct atatttctcg aaacaaacga aaaggaaacg aaagatgaaa cataaatcat
     2401 ggatcaatta agccctctcg gggacttgct taagataaga ataaaaaaaa ggtaaatacc
     2461 atggaataag gtttgatcct atttatgggg attccgtaaa tattccattc caaaaaaaaa
     2521 aagagaaagt tcgaaacaat tgggattttt tggagattgg atgcagttac taattcatga
     2581 tctggcatgt acagaatgaa aacttcattc tcgattctac gagaattttt atgaaagcct
     2641 ttcatttgct tctcttcgat ggaagtttga ttttcccaga atgtatccta atttttggcc
     2701 taattcttct tctgatgatc gattcaactt ctgatcaaaa agatatacct tggttttatt
     2761 tcatctcttc aacaagttta gtaatgagta taacggccct attgttccga tggagagaag
     2821 aacctatgat tagcttttcg ggaaatttcc aaacgaacaa tttcaacgaa atatttcaat
     2881 ttcttatttt actatgttca actctatgta ttcctctatc cgtagagtac attgaatgta
     2941 cagaaatggc tataacagag tttctcttat tcgtattaac agctactcta ggaggaatgt
     3001 ttttatgcgg tgctaacgat ttaataacta tctttgtagc tccagaatgt ttcagtttat
     3061 gctcctacct attatctgga tataccaaga aagatgtacg gtctaatgag gctactatga
     3121 aatatttact catgggtggg gcaagctctt ctattctggt tcatggtttc tcttggctat
     3181 atggttcgtc cgggggagag atcgagcttc aagaaatagt gaatggtctt atcaatacac
     3241 aaatgtataa ctccccagga atttcaattg cgcttatatt catcactgta ggaattgggt
     3301 tcaagctttc cctagcccct tctcatcaat ggactcctga cgtatacgaa ggagtgcggt
     3361 tcgttcgaaa aattcctact tctctatcta tctctgagat gcttggattt ttcaaaactc
     3421 catggacatg cagaagagaa atgctatccg cactcggacc aagacataac ttttacttgt
     3481 tcaaataaca attaaggtga agcagcgtca ggaacaacga atctctttat gataaacaag
     3541 attcattttg caagttcgtt attacgggta gctcctacaa aagatcggac taatgacgta
     3601 tacaatattt aaattctcga tgtagatgct acatagttgg ttctcatcct tcagagacta
     3661 cgagtgtaat aggagcatcc gtcgacaaaa ggatcaccct aagatgatca tctcatggct
     3721 attgagaacg aatcaaatca gatggttcta tttctcaatc ttttcgacct cttggttccg
     3781 taggagcaag tcagaaagat tgagaaaaat tggtcattca caaccactga tgaaggattc
     3841 ctcgaaaagt taaggattag taatcctttt tagaaatcga atggattcgg tcttatacat
     3901 acgcgaggaa ggtaatcaaa aaagaaagaa gatgagttct tctttctttt atcacttagg
     3961 agccgtgcga gatgaaagtc tcatgcacgg ttttgaatga gagaaagaag tgaggaatcc
     4021 tcttttcgac tctgactctc ccactccagt cgttgctttt ctttctgtta cttcgaaagt
     4081 agctgcttca gcttcagcca ctcgaatttt cgatattcct ttttatttct catcaaacga
     4141 atggcatctt cttctggaaa tcctagctat tctgagcatg atagtgggga atctcattgc
     4201 tattactcaa acaagcatga aacgtatgct tgcatattcg tccataggtc aaatcggata
     4261 tgtaattatt ggaatcattg ttggagactc aaatggtgga tatgcaagca tgataactta
     4321 tatcttcttc tatatctcca tgaatctagg aacttttgct tgcattgtat tatttggtct
     4381 acgtaccgga actgataaca ttcgagatta tgcaggatta tacacgaaag atcctttttt
     4441 ggctctctct ttagccctat gtctcttatc cctaggaggt cttcctccac tagcaggttt
     4501 tttcggaaaa ctccatttat tctggtgtgg atggcaggca ggcctatatt tcttggtttc
     4561 aataggactc cttacgagcg ttgtttctat ctactattat ctaaaaataa tcaagttatt
     4621 aatgactgga cgaaaccaag aaataacccc tcacgtgcga aattatagaa gatccccttt
     4681 aagatcaaac aattccatcg aattgagtat gattgtatgt gtaatagcat ctactatacc
     4741 aggaatatca atgaacccga ttattgaaat tgctcaagat accctttttt agcttctaga
     4801 acctatttct tagttcaaga tccctcttac taactggaat caaagaatta gtagatctgt
     4861 tccgcccaaa atgggaatgg gctagggtta tgaacttata atctgataat cgagtcgatt
     4921 ccatgattat aagttcattc cataccggac cagaccggaa taggcttata tacattctca
     4981 ttatgagaag gggtcattcg agcgtatcta aatagatact atcgtatcta aatagatact
     5041 atgtttacat atggatccct ccgtcgttac attccattta ggattaggaa taggcgtaat
     5101 cggacctgct ttttacatat atatctctcc ttatttggga ccctattcta ttcacctctt
     5161 tgggcgtcta ttgaatcgag aaatgggttt gattgtccat ttttttgcta taattttttg
     5221 ctataatata tatataaggc atgttccgga taattcaaat cgaagcaatt ggatgtccga
     5281 ctcgggccta tatgacatga acgatcaata gaaatactcc aacactccac ctttgtcata
     5341 tattccatac atcacactag atagatatca tattcatgga atacgattca ctttcaagat
     5401 gccttggtgg tgaaatggta gacacgcgag actcaaaatc tcgtgctaaa gagcgtggag
     5461 gttcgagtcc tcttcaaggc ataatattga gaatgctcat tgaattggaa taagttcggc
     5521 agcggatcac gaaatcttgg tgatcttctc tatctaatga atggggagtc cgctttgaaa
     5581 tcgttcgccc tgcaaccacc cccgagtata tgcttcaaca ggaattacac aagggtagat
     5641 tgatacaata gaaacctctg gtaaaatgcc cgcccgtcac ccaacagata aagtacatta
     5701 catagtccgt tttagggatt ggcgacttac ccattcagtg actttggcac tggatggtcc
     5761 caaaaaaaaa tgggtactat cgggtcgggt gaattcaata ataggcgtct gttggcattc
     5821 catccttcct tctcctttca gggactatcc gaaagagaat ccagtacttc ttggtcgtga
     5881 atatctgaat aggacgaacc gccccgtgga tatctttgct tcggaacaaa acaattagaa
     5941 ttaggcccgg tcaactggaa tgtgtattat ccatataggg gatcttccaa ttgagaagat
     6001 ccatcgacct gagacgaaga gaagggtcta tctattttat ttagttattc atttagttat
     6061 tcagttaaac caatgattcg ttattggagc agatagcaac aaccaccatt tcatccgaca
     6121 tacgtatttt tgattttcca atggatttac atctttcatt aatggaaatt ttttgatgta
     6181 gtgagtaata gctctggttg ctcgctgttc aagaattctt gtttaggcag ttcataccat
     6241 ccatacatag tgttttgatc taagatttca attcttccat gtttcagcag taacatattc
     6301 ttccatgtcc aaaatatgga agaaagaggt gtttccacga ctttaccacc cagtcaattc
     6361 tgttccactt aatctctatt tcatggccac atatctttca ggctaaggaa tgggaaacct
     6421 ttctcctatt acatgaatcc aatttcatcc gggaaaagcc atctttttct caacaatgcc
     6481 tttgtcattt gatccaatag cgttccgtta gataggaaca gatttgataa atactgataa
     6541 ctctcggata gagtattaga acggaaaaat ccattagata atgaactatt ggttctaagc
     6601 catttctggc gatgaatcaa caattcgaag tgcttttctt gcgtattctt gataaaccag
     6661 cgtttatata tagatgtagg aggattggtt tgggaagtaa gaagcccctt tgacatctct
     6721 tcatctgcaa agaattcttg atgtgaaaac acagagacaa aggggggatc tttgaatagg
     6781 aaaaagagtg gatccgcagg gtcccaaatg aattggctta ttcgaaaaaa gccttgttct
     6841 ttggaagatc tatctcctgt ctggtactgc atggttccac tctgcaagaa ctccgaatcg
     6901 ttctcttgaa gctcatcctc ttcatcataa atgatccgct tgtcccgaaa tgacctggcc
     6961 caatagggaa atcccaattc attggacctt tcgatacaat caaatagaaa gccccagggg
     7021 cgccatattc taggagccca aactatgtga ttgaataaaa cctcctctat ctgttgtgga
     7081 tcgaggactc cttctccttc cccttcttca aactccgatt cgtatttttc atagagaaat
     7141 ctctgatcaa ggatagaaca agatccattt tgcatcatat ctaagggact ccttggttcg
     7201 ggccgaagaa gcaatgtcac tcgatcatta tcaaaccgac tgcaatcttt ttctgtccgt
     7261 gaggatccca ccagagcgcc ttctacttct aataggccgt gaactagatc cgaatcattt
     7321 tcaacaagtc cataataagt gatcccattt ttttcatcgg gtccgggtag agaccaaagg
     7381 tcttgagcaa ccaatccggc agaacaactc aaaagataaa gaagtatcgt caatttcttc
     7441 atgctcgttc caagttcgaa gtaccatttg tacaaataag aatccccttc attacatgat
     7501 ttcttcttca tatagataga tataggatct acggggcaat tacttagaaa tacattttgt
     7561 gcaacagccc ttcctatctg atagaaaagg atcccatgat cctgaaccga tcttacctgg
     7621 gatcgcaaat cccaagtttg tctatgaaga gcagatctaa ttatattagt gtctataatt
     7681 gatttcttct gtgtaatact aattgatagg gcctcattgg taagtgctac aagatctcgt
     7741 acattggaac ccatggttat ggacccgaat ccattagtat ggaacatttt cttttccaag
     7801 tgaaatcccc tagtatatga aagagtgaaa aagtgctttc gttgttgtgg aataagaagc
     7861 cttcgtatct taatgcatgt atttaattta ttcggagcta ttagagcggg atccactttt
     7921 tggggaatat gagtcgaagc aataacaaga atatctctag tggaacatct ttcacaatcc
     7981 ctggagagat agttcactaa tagaccaagg gataagtaat tcgactcatt cacatccaga
     8041 tcatgaatgt ttggaatcca tattatgcaa ggagacattg cttttgctaa ttcgaattga
     8101 agggtgatat aaaatcggtc tatttccggc atcatatcca tagttagcgc attcatccta
     8161 gttagaagct ccagctccgt atcaaggtca cggtcgagat cgtcactcac atcaatatcg
     8221 tcactatcat caataagaaa acccttaggc ttgttatcca ggaacttgtt aagaaatact
     8281 gtaatgaaag gaacatagga gtttgtcgct aggtatttga ccaaatagga tcgtccagtt
     8341 cctatagaac ctatcactaa aataccccta gagggggata gggctaagcg gagcgaaaag
     8401 ggttttccat gagatgggaa atgaaaacta ttcgccccac acgaggtttg tgaataagtg
     8461 attgtctgat aatgagcaag gaatatccgt ctttcggcta aacagggtgt attgaactca
     8521 taattcatta gatacttttt atgaatgtca actaagtatc gtaagtaaat ggatcccggc
     8581 tcttcaatca tttgataacc agagtcattc tttgataaat gatcactatg agtcagactc
     8641 aatagaattt gatcaatcct tttttctgtc gttaaggtgg agaactgaac caagaattct
     8701 ctttctttat catcaattga atcactgttc gcgaccaagg attctatttt atcatcaatc
     8761 caatcaccgt tcacgttttt tctttttctt atcaatgaat aaatctcttt acttgtatga
     8821 cttagatgtc tcgtatttct cgaaaaagtg attcgattga tgggatttgg tatgatactt
     8881 atgagatcga tgagattgat attcaaaaat ttcttcttag aacgtattga tttgacccca
     8941 taagcgggac caccacccca tagcatgttg acgccagaag cagaaccccg tatttcttct
     9001 agaaaatctc ctaattgttc cagagcaact agaaagagat tctttaacca gaaagaattc
     9061 agttcagatg taggatacct atccagaagt tttcgcaact caatcatgta tgatggaatc
     9121 atcaaagatt tgaccttttc gaactctgtc tgtaactcac tagaggctcg ggaaacaaag
     9181 agaagatgtg tacgaacgag atatccagca acaagaagaa ggaaaaggat tgaatagagg
     9241 aactcccgaa cgtttggcga tctcagatgt gtcgatatca atggtgactc attatttcga
     9301 tgaatcattt cttcggacag aagaagatta tgtaaacact tactcgaaat ctcgcttatc
     9361 agattccatt gtggaagaca caattttttc tgaagaattc gccatgatat atctaatcca
     9421 tgcataatat catgaaaaat ggatacaaat ttttgactgc tacttagtat cggtaatagg
     9481 tctgaaaagg tatctaaaaa tatcaaattt agatatttgt accctgtcga agtaaggaac
     9541 catggcatat atgtttggaa tagattccat tttgagagag ttgaaaaagc actatctcgt
     9601 tgaaaggttc tatacatctg ccctttttca acgcatttct ttagacaaag actccgtttt
     9661 ttcctctttt cggatggtaa atctttctca gaacatggag tgtgaatcaa acccatgttt
     9721 gaattgaaat tgagatactg atgcaagttc ttcccttctg aatcagatag attcatatcc
     9781 gaaagaggtt gacaataagt tctttcaaaa ttgactattt gtccctctgt tagaggtgtt
     9841 ccagaaatgt ctgcgatcga ataaatagct ctacgaacga atggatcgga tcgaattgga
     9901 aaatggaaag atttgtacaa gttatacctt tcgtcaccac ttcgtggaaa atcattaggt
     9961 atgaatatgt tagatacctg tgactcgatt ggtgaaatag tatctctctc caaaaaagca
    10021 tgtttttttt taccgccgca caaagacaaa gagaatattt tgttgcgaat gaacaagata
    10081 ttgaggaatt gtccatacgt aaaatcataa ttcttgatac gggccttttc cacataaaaa
    10141 gggaatcttt tgttacaata gaagcagaag tgatgtagat tattcaagaa tcgaagtcga
    10201 tttgctttat aaaaagaaga tatcaatgaa cttctatgaa atggttttac gggattcagc
    10261 caattgtctt gatcgtggga tatcattgag aaataggaat ccgtgttatc aaaagatttc
    10321 ctgcgattat ttctagtatg gaatgagtca atcatccact ttggtatctt attgaacaaa
    10381 aatggtgata ttgttcctcc attgatcaaa aatttcgatt tttgggaagt atcatgatca
    10441 tccaataaga agggtttcca ttttttcaaa tgaacgattt gaagacctat tggttctaac
    10501 agctgattac agagttgatc attcggacct ttgcagtcgg ccagaaggtt gttccgtagg
    10561 taatcagcaa tggtttcaag gtcatacacc aacctcttag atctggcgtc tggtgatgct
    10621 ccaaattttt gctgggaaag gaagaggttg cctcgagttg caacttttgc tggcgttttg
    10681 tctgagctgg atgatgaaac atgcagtagt gttggctctg atgctccttc atcagtatct
    10741 caggagcgga ttatcattgt gggtaaccaa cttccccttc ggtcccatcg aaatccagat
    10801 ggcagtggag agtggtgctt tagctgggat gaggactcac ttcttttaca acttaaagat
    10861 ggcctaggag aggatgttga agtcatctat gtcggctgtc tcaaagaaga gattgacact
    10921 agtgagcaag atgatgtgtc acaaatattg ctcgaggctt tcaaatgtgt tcctgcattt
    10981 atacctcctg accttttcac taagttctac catggtttct gcaagcagca tctctggcct
    11041 ttatttcact acatgcttcc tctatcaccc gatcttggtg gccgctttga tcggtccctt
    11101 tggcaggctt atgtttctgt caacaaaata tttgcagaca aagtaaagga agtaatcagc
    11161 cctgatgatg attatgtgtg ggttcatgac taccatctca tggttttgcc ccccttaaaa
    11221 aaaaaaaaaa aaagaattcc aaaaatttta ttttgaattt attagtaatt tttattagaa
    11281 attcattatt caaaattgaa gaaattgaaa tttatttttt agtctagttt ctatatattt
    11341 aatatttact ttctatttat aatgctattt ataatgtttg attgtatgtt tataactagg
    11401 attatcaaag tgaggagact cctttctttt tgtctatgtt ttcacggtaa gaaaggactc
    11461 ctttgttttg tgctttaccg ggtaaggtat accaagaaaa gcctatttga caatgttacc
    11521 aatgaaaggt gtcaaagatc ctcatttttc caactcgaac ttaccaataa atacagtaag
    11581 tcgttcctaa acccgtgtaa cttactagtg gattcgattt tgattaggtt agattggagc
    11641 ttttttttta accgttatga ttttggctcc aaaaattcat taggtttggg taggtattcc
    11701 aaaggcgaag aaaagaagta tcactaactt tttgattgcc gaaaggaaag gaggaaaatt
    11761 catatgtaat tgacctacaa agagtaatga aaaaaatttg gtttgtttag acaagattag
    11821 aaaaaatacg gattggatct attgaaatgc gcttttttgt ttcatcttta tgctcggccc
    11881 tgaatgattc ctgtaagcag aatgcttttt ctttttcgat gaatcaagca agcacaagcg
    11941 gctagttata aacaacaaag aatacaataa tgaagaactg aaaactataa actatacaat
    12001 ttttgttttc atttttttta gggctatacg gactcgaacc gtagaccttc tcggtaaaac
    12061 aggtcaaact ttttattatc aaaatgattc gaactgtttc aaagacccaa catgcatttt
    12121 ttgttttttg cattgagctc tttcattaac tgatagaaat aatcggttag tctaccatag
    12181 ttctcttgac agaaagataa gaagatggct ccatgtgctc tgatttatta tggattccga
    12241 tccgagagca ctaccaaagt gtttcaaaga agggttatcc tgacgtaggt ctgcttttgg
    12301 cttagatcaa cctaagttaa atggagtctc catcgccccg cttctgctta aagaatcaaa
    12361 tatgaaactt catacacctt aaagttcata gggataggat aggacgaaaa gagaattttt
    12421 tgaaatcctt atactcagcc tagcattgaa tagactggat atttacctta tcaatatctt
    12481 aaatcaataa tgggttctct tgagtgctga aaagagcact taaattaaac cgaatgtttt
    12541 gtcaggctat tgttctcttg ttccctaaaa gtcatggagt aagacatcaa cttctgaata
    12601 agtcttttaa ttatatgata tacttctttg aaaaacattg acgcgcgtgt aaacgaggtg
    12661 ctctacctaa ctgagctata gcccttgtac ttgtgataca cattttatca tgtcgataat
    12721 ttcttgtcaa gataaagatt acaagggcta acatcctatt tctttgatct gcttgtttgg
    12781 tattgcttat aaataatatt cgatttataa tcgatagatg ggacgggcta ccttttttct
    12841 ctttatgatg ataaaagacc tacttaactc agtggttaga gtattgcttt catacggcgg
    12901 gagtcattgg ttcaaatcca atagtaggta gaacttatta gatagcagaa tcaatggtat
    12961 ctaataagtt ttgctaccca ccttttcttt ttatttgatt gatttttgat cttttccatt
    13021 ccattctatt tcatttttga attgaaaaat ttttcgttgt attagaatct gatttgactt
    13081 atgattccag tcaattggca gaaaaaaata gatgtataaa cgaaacctct gtttatacag
    13141 aagttatttt gattattcgg acacaccaac aactagttat agttacgaaa tcagattgat
    13201 agcctctact cgtgccttag cccgtctgag agccagattg gcctcaatta tttgtctctt
    13261 tccttcagct ttcctcaagt ttgcttcggc tatttcaaga gtttgctgag cttcttgtgg
    13321 atcaatgtca ctacccctct ccgcatcatt tactaaaaca gtaatctcat tattgcctat
    13381 tctagcaaaa ccacccatca gagccatcgt taaccattcg tcgttaaggc gtattctcaa
    13441 aataccgata tcgacagcag tggcaatagg cgcgtgattt ggtaatacgc caatttgtcc
    13501 actattagta gataaaatga tttctttaac ttctgaatcc caaacaattc gattcggggt
    13561 cagtacacaa agatttaagg tcatttcttc aagttgttct ccatttctaa attcgtagcc
    13621 ttcgcagtag cttcatcaat gttacctacc aaataaaagg cctgttcggg aagactatct
    13681 aattctccgg aaaggatcaa tttaaagcct ctaattgttt ccactagacc aacatatttt
    13741 cccggagaac cggtaaatac ttctgctaca aaaaagggtt gtgataagaa acgctcaatt
    13801 tttcgtgctc ttgctacagt taagcgatcc tcttcggaca attcgtccaa cccaaggata
    13861 gctataatgt cctgaagttc tttgtaacgt tgtaaagttt gcttaactct ttgcgcagtt
    13921 tcataatgtt cttcaccaac gatctgaggt tggagcatag ttgacgttga atctaaagga
    13981 tccactgctg gatagatacc tttagcagct aatcctcttg atagtacagt agtagcatct
    14041 aaatgcgcaa atgtagtggc aggagcaggg tcagtcaaat cgtccgcagg tacataaact
    14101 gcttgaatag aggttatgga cccttctttg gtcgaagtaa ttctttcttg taaagaaccc
    14161 atttcggtac taagggtagg ttgataaccc acagcagaag gcattctgcc caataaggcg
    14221 gatacttccg atcccgcttg gacgaaacgg aagatattgt cgataaatag aagcacgtct
    14281 tgttcattaa catctcggaa gtattccgcc atagttaggg cagtcaaacc aactctcata
    14341 cgagctcccg gcggttcatt catctgacca tagactagag ccacttttga ttctgcaata
    14401 ttttcttcat taattactcc agattctttc atttccatgt aaagatcatt tccttcacga
    14461 gtacgttcgc ctactccgcc aaatacggat acacccccgt gagctttcgc aatgttgttg
    14521 attaattcca taattagtac tgttttcccc actccagccc ccccgaatag tccgattttt
    14581 cctccacggc gataaggggc taaaagatct actactttaa ttccggtttc aaaaatagat
    14641 aattttgtat ctaactgtat aaaggcaggc gcagatctat gaatagggga tgttgtgcga
    14701 gtatctacag gacctaaatc atcaacgggt tctccaagca cattgaaaat tcgtcctaga
    14761 gtcgccccgc cgactggaac acttagagga gctcctgtgt caatcacttc tattcctctc
    14821 attagaccat ctgtagcact catagctaca gcgcgaactc gattatttcc taataattgc
    14881 tgtacttcac aagtcacatt aatttgttga ccggcagtat ctcgaccctt aactaccagc
    14941 gcgttgtaaa tattaggcat cttgcccggg ggaaaagtta catctagcac cgggccaatg
    15001 atttgagcga tacgccccag gttctttttt tcaagcgtgg aaactccagg gtcagaagta
    15061 gtaggattga ttctcataat aatataaaaa catgtcgaaa tttttttttt tcgaaaattt
    15121 tccagtccaa aagaaatgtt cgataacaag ttgatcaatt aattcaataa gaagtgggag
    15181 ttagcactca atttcgtttg taccatctaa cgaatccaat ttaattgttt acttattttc
    15241 aatttcaatg agttaatttt caagttcaac taactcattt tcaaaacaaa atagagatat
    15301 caaaatatat atattaagtg tatgaataaa aagggcttca ggaagctttt catttgtcta
    15361 tcactataaa caatactatc tatttatgga attcgaacct gaactctatt tatgattcat
    15421 tatttctatc tcatcggtac ttttttctta tttaaacaga tctagttacg cctagttatt
    15481 attttctttt tttcctagac gaattccgcg gattttcaca tttacacctt ttcacattta
    15541 ggatttacat atacaacata tatcactgtc aagaggacat tttttttatt atttagatat
    15601 tttgattaaa aaagttaagg atttagaaac ttgaaaaaca agggttgcgc catacatatg
    15661 aaagagtata caataatgat gtatttggtg aatcaaatac catgatctaa tgtctaataa
    15721 cgaaattatg attagttgat aatattggtt aataattttg tgaaagattc ctgtgaaagg
    15781 gttcattcac tcctaattca tgtcgagtag accttgttgc tgtgagaatt cttaattcat
    15841 gagttttagg gagggactta tgtcaccaca aacagagact aaagcaactg ttggattcaa
    15901 ggctggtgtt aaagattata aattgactta ttatactcct gactatgaaa ccaaagatac
    15961 tgatatcttg gcagcattcc gagtaactcc tcaacctgga gttccgcccg aggaagcagg
    16021 ggctgcggta gctgctgaat cttctactgg tacatggacg actgtgtgga ccgatggact
    16081 taccagtctt gatcgttata aaggacgatg ctaccacatc gagcccgttg ctggagaaga
    16141 aaatcaatat attgcttatg tagcttaccc tttagacctt tttgaagaag gttctgttac
    16201 taacatgttt acttccattg tgggtaatgt atttgggttc aaagccctac gcgctctacg
    16261 tctggaggat ttgcgaatcc ctactgctta tactaaaact ttccaaggac cgccccatgg
    16321 tatccaagtt gagagagata aattgaacaa gtatggtcgt cccctattgg gctgtactat
    16381 taaaccaaaa ttgggattat ccgctaaaaa ttacggtaga gctgtttatg aatgtctccg
    16441 cggtggactt gattttacca aagatgatga gaatgtgaac tcccaaccat ttatgcgttg
    16501 gagagaccgt ttcgtatttt gtgccgaagc aatttataaa gcacaggcgg aaacgggtga
    16561 aatcaaagga cattatttta atgctactgc gggtacatgc gaagaaatga tgaaaagggc
    16621 tgtatttgcc agagaattgg gagttcctat cgtaatgcat gactacttaa caggaggatt
    16681 tactgcaaat actagcttgg ctcattattg ccgagataat ggtttacttc ttcacatcca
    16741 tcgcgcaatg catgcagtta ttgatagaca gaagaatcat ggtatgcact ttcgtgtact
    16801 agctaaggcg ttacgtatgt ctggtggaga tcatgttcac gctggtaccg tagtaggtaa
    16861 acttgaaggg gaaagagaca tcactttggg ctttgttgat ttactgcgcg atgattttat
    16921 tgaaaaagat cgaagtcgcg gtatttattt cactcaagac tgggtctctc taccaggtgt
    16981 tctgcccgtg gcttcagggg gtattcacgt ttggcatatg cctgctctga ccgagatctt
    17041 tggagatgat tccgtactac aatttggtgg aggaacttta gggcaccctt ggggaaatgc
    17101 gcccggtgcc gtagctaatc gagtagctct agaagcatgt gtacaagctc gtaatgaggg
    17161 acgtgatctt gctcgtcagg gtaatgaaat tatacgcgag gccagcaaat ggagtcctga
    17221 actagctgct gcttgtgaag tatggaagga gattaaattt gaatttgagg caatggatac
    17281 aatttgaggc aatggatact ttgtaatcca cgttttttct tttaattgaa ttccaattaa
    17341 actcggccca atcttttact aaaaggattg agccgaatat aaagatccta ataaaaataa
    17401 aaaggtccta ttgtatatat ttttgtatat attttttata tttttgatat attagatata
    17461 caagacctta aatacaaaaa aaaatagaag gctaaacaac tcaaaccttt ctattcttgt
    17521 cttggatcca cacttaatcc taaggatcta taggattgat gtattctttt atatctatat
    17581 ctcgtagttt cggtcaaggg tcgatccaag tatcacaact ttgtctaccc atcctgtata
    17641 ttgtcctttt cgttccttat ccgtattgga atagaaacgt attaataggc gagattttac
    17701 caaaaatttt cttcttcata ttcctaggag aaaagaaaaa attattttct cgatgcaaat
    17761 acgaatttta cataacatga caaattccta ttttattttt atattttgtt agatatctat
    17821 tctatttaga tagttagttt agaattctga taatagaatt cgaatatttt attatattta
    17881 agatttcgtt ttttagttta tattaaaatt gaaattaaat taattattta atataaatat
    17941 tcaatttaaa atgaaaatta aaaaataatg gaaagaaaat ggggttccat cataatctta
    18001 ttttttccta ccccttacct tattcaatac ccagttaata atcctagtgt ttggatccat
    18061 atgcttattc tgctcagaaa tgaaatattc aaatgatttt ttttttcatc gaatgactat
    18121 tcatctattt tttttgatat aaatagtggc aagaaagctc tatggaaaaa tggtggttca
    18181 attcgatgct atctaacagg aaggtagaat acaggtgtag gctaaataaa tcaatggata
    18241 atattggtcc tcttgaaaat accagtataa gtgaggaccc tattataaat aagacagata
    18301 aaataaataa gacagataaa aacacctata attggagtaa tagtgagagt tctagttatt
    18361 gtaatgttga tcatttagtt ggcattaggg acattcggaa tttcagtgcg gatgacactt
    18421 ttttcgttag ggatagtaat aggaacagtt attcgatata tattgataat ccaattttta
    18481 agatgaacaa tgatcgttct tttctgagtg aactagaaag ctctttttat atttattgga
    18541 attctagttc tctgaataat aggtctaggg gtgacggcca ctatgatcat tatatgtatg
    18601 atactaaata tagttggaat aattatatca atagttgcat tgacagttat cttcattctc
    18661 aaatctgtat tgatggttct attttaaatg atagtgacaa ttacaccgaa agttacattt
    18721 atagttctat ttgtggtgaa agtgaaaata ggagtgaaaa cgagagttcc ggtctaagaa
    18781 gaaaaacgaa tggcagcgat ttaactagaa aagaaagttc taatgatcgc gatgtcgctc
    18841 aaaaatacag gcatttgtgg attcaatgtg aaatttgtta tgcattaaat tataaaaaaa
    18901 ttttgaagtc aagaatgaat atttgtgaac aatgtggata tcatttgaaa atgagtagtt
    18961 cagatagaat tgaattttcg attgatccag gtacttggaa tcctatgaat gaagacatgg
    19021 tatccctgga tcccattgga tttcattcgg aggaggaacc ttataaagat cgtattgatt
    19081 cttatcaaag aaagacagga ttaaccgagg ctgttcaaac aggcacaggc caactaaacg
    19141 gaattcccgt agcaattggg gttatggatt tccagtttat ggggggtagt atgggatccg
    19201 tagtaggcga gaaaattact cgtttggtcg agtatgctac caataaattt ttacctctta
    19261 ttctagtgtg tgcttccgga ggagctcgca tgcaagaggg aagtttgagc ttgatgcaaa
    19321 tggctaaaat ttcttccgct ttatatgatt atcaatcgaa taaaaagtta ttttatgtat
    19381 caatccttac atctcctaca actggtgggg tgaccgctag ttttggtatg ttgggagata
    19441 tcattattgc tgaacccaat gcttacattg cgtttgcggg taaaagagta attgaacaaa
    19501 cattgaataa gacagtacct gaaggttccc aagcggctga atttttattt cataaaggct
    19561 tatttgatcc aatcgtacca cgtaatcttt taaaaggggt tctgaatgag ttatttcagc
    19621 tccacgcttt ttttcctttg aattataaat aaaataaata aataaagtaa agtagagctt
    19681 aacttaatta attctaaatt ggtttaatta taaataagtt aactaattat ttgagttcgg
    19741 ccgaacaagt atttatcgaa atcaaaggaa aaacccgaag aatgcatttt tttttgtgac
    19801 ggaagagtaa attgtagaaa gtatcctgta ggtctttttt ttttttttta ccgatatttc
    19861 tgattactaa tactaattag gcaacctcta tcgacaaacc aagagaaaag agtgcatttt
    19921 ttcttatgcg aaattgaatt tacaaggtaa ataataaata aaaccaattt catgttcttt
    19981 tcttacctct gtatagaaaa tatagagtct tgcatatatg gagtcttgca tatttctata
    20041 tagctgtcga aaatccctct tttactaata ttttaaatcc ctattgttcg atcggattat
    20101 aaggcacttt ttcggaaatt tataagcgga agaagttctt tctaaaatga aagtcaaatt
    20161 aaagttataa gacaagaaaa agataataaa agaagaatga gaactaagtg ggttatcata
    20221 catataattt atgtagaaaa atgaaagagt ccatttacca tttagttagt tctacactcc
    20281 ttgtacttta attatatata ctcacttaga tatacttaat ctaattttat acaaattata
    20341 ttataatgat tataagatat ctttctaaca aaataataaa gcaataacag gtaaaaagat
    20401 taataaaaaa taggtacaaa ttttaaatcg aggtgcccat tctatgacaa ttctcaacaa
    20461 cttaccctct atttttgtgc ctttagtggg cttagtattt ccggcaattg caatggcttc
    20521 tttatctctt catgttcaaa aaaacaagat tgtgtagatc cgatgggacc aaatctcatc
    20581 tatttttttt tttcaagact tagacttgga ccataacaca gatatctatt tagtataata
    20641 tggtataata tgcggcttcc ttcaaaaaaa aaaacataaa tgaaaaaagg gttcttatgc
    20701 aggcgtaata aataggctat atgagtaaat aagctatttg aaaaaaaaaa tcgagattgg
    20761 ggcgaatgcc tgaaattgaa ataaaagcaa agctaatgta tctatatgtg tgtaagtgta
    20821 aataggggat tatatgaggg ggctcctctt attttagatc taacaaattc aatgaattcc
    20881 cccctaagat ttacatcaga atagtgcgag ttgataaaag ttactttgga aacaaaaaaa
    20941 gtcaaattca tttgagctag tctcccactt ccaataaaat taactggatc tagtatgagt
    21001 tggcgatcag aacgtatatg gatagaactt atagcgggat ctcgaaaaac aagtaatttt
    21061 ttctgggcct ttatactttt tttaggttcc ttgggttttt tattggttgg aatttccagt
    21121 tatcttggaa gaaatttaat atctttattt ccgtatcagc aaatcatttt tttcccacaa
    21181 gggatggtga tgtctttcta tggcattgcc ggtctattta ttagctctta tttgtggtgc
    21241 acaatttcat ggaatgtagg tagtggctat gatctatttg atagaataga aggaatagtg
    21301 tgtatttttc gttggggatt tcctgggaaa aatcgtcgca tcttactccg attccttatg
    21361 aaagatattc agtctatcag aatagaagtt aaagagggta tttatgctcg gcgtgtcctt
    21421 tatatggaaa tcagagggca gggggccatt cctttgactc gtactgatga gaatttgact
    21481 ccacgagaaa ttgagcaaaa agcggctgaa ttggcctatt tcttgcgtgt accaattgaa
    21541 gtattttgat tagatacaga tagatcatat cttgtaaatt atcccccccc cttttttttt
    21601 caatcgacgt ttctttttat ctgtgctcct taatgagcgt tggaccagtt cgaatgataa
    21661 cttttctgtt ttatttggct tttaccgctc atttttgatc atcacaatat tctttcagaa
    21721 atctatctca cttattcctg tggaatatcg gcagttgacc aattttgttt tcaaaatatt
    21781 ttctattttg atacaaagga attcgttcat ctcgaaatct gaattggaag tggctctttc
    21841 gggcattcat cgaaaagagg gaattgcttc aaatttgagc aattgaaata tctggaaaga
    21901 ataggaattt tttgtttctt cattcgtttt tcttaggcca tttctgtatt ctttctaaat
    21961 tcaagaatta cccactgatt cacatataaa caaataaaaa agaactagct tcataggttc
    22021 gaaagggtcc gaagccttgt aatagaactt atgcttgata gaaatattcg atcatataga
    22081 gtcgacgaat gggatcgttt cattaaaaat tcacagacaa caaaatgaaa aaaaaaacat
    22141 ttattcccct tctatatctt atatctataa ccctcttgcc ctggtgtatc tctttttcat
    22201 ttaataaaag tctggaatct tggattatta attggtggaa tactaataaa tatgaaactt
    22261 ttttaaatga tattcacgaa aagggtattc taaaaaaatt catagaatta gaggaactct
    22321 tactgttaga cgaaatgata aaagaatacc ccgaaacgca tctacaaaag tttcctatcg
    22381 cagtccacaa agaaacaatc caattgctca agatgcataa tgagcagcgt atccatacaa
    22441 ttttgcactt ctcgacaaat ataatctctt tcattattct aagtgtttat tctattctag
    22501 gtaatgaaga acttattatt cttaattctt gggttcaaga attcctatat aacttaagtg
    22561 acacaataaa agctttttct attcttttat taaccgattt atgtatagga ttccattcac
    22621 cccacggttg ggaattaatg attggctctg tctacaaaga ttttggattt gctcataatg
    22681 atcaaattat atctggtctt gtttccactt ttccagtcat tattgataca atttttaaat
    22741 attggatttt ccattattta aatcgtgtat ctccgtcact agtagtgatt tatcattcaa
    22801 tgaatgactg aaaaacggtc caccgatcaa attagaatgt ttggtatttt gtacataaac
    22861 aaaacattca aaatcttact ttttttttta tttttatata gtaatttttt cgatacattc
    22921 aaaagattcg gatttttctt atattttaga aaaatttttc agtaaatagc agcatcgtgg
    22981 atagggaact atactagtaa cctacctaat tttattgtag aaattttcgg gatcaacgtt
    23041 ggatcatgca aactagaagg accctttctt ggataaagga agagattacc cgctccattt
    23101 ccgtatcgct catgatatat ataatcactc aggcatccat ttccaaagca tatcccattt
    23161 ttgcacagca ggtttatgaa aatccacgcg aagcaactgg ccgtattgta tgcgccaatt
    23221 gtcatttagc taataagccc gtggatattg aggttccaca agcggtactt cctgatactg
    23281 tatttgaagc agttgttcga attccttatg atatgcaact gaaacaagtt cttgctaatg
    23341 gcaaaaaagg aactttaaat gtaggagctg tccttatttt acccgagggg tttgaattag
    23401 cccctcccga tcgtatttcg ccagagatga aagaaaagat aggtaatctg tcttttcaga
    23461 cttatcgccc cactaaaaaa aatattcttg tgattggtcc tgttcctggt cagaaatata
    23521 gtgaaatcac ctttcctatt ctttctccga accctgctac taggaagaat attcacttct
    23581 taaaatatcc catatacgta ggaggaaaca ggggaagggg gcagatttat cccgacggga
    23641 gcaagagtaa taatacggtt tataatgcta cagcagcagg tatagtaagt aaaattctac
    23701 gaaaagaaaa aggggggtat gagataacca taacagatcc gtcagaggga cgtcaagtga
    23761 ttgatattat acctccagga ccagaacttc ttgtttcaga aggcgaatcc atcaaacttg
    23821 atcaaccatt aacgagtaat cctaatgtgg gtggatttgg tcagggggat gcggaaatag
    23881 tacttcaaga cccattacgc gttcaaggcc ttttgttttt cttggcatct gttattttag
    23941 cacaaatctt tttagttctt aaaaagaaac agtttgagaa ggttcaattg tccgaaatga
    24001 atttctagat ctacggattt atcaccagca agttcttaaa aagaacacaa tttttgttgg
    24061 caattatgta tgatcaaatt ttgacaagcc tttttttttc ttttctttct atttttttat
    24121 accagatttt gggaattact tataccgcat ttctagtcat agtatggata ttggtaaaaa
    24181 ggctatttta ctttatccct tcttttggtc ttttttaatc taaatggaag cggtctgatt
    24241 ctgttactat tgtcagattt catagaatgt atcacttttc tattcgcata gaatccaatt
    24301 cgactagata ctaattctta gtcgtcggca caagaaaggg attttcttgt gtcgaaataa
    24361 taatgattct tgatctcatt tgtcaaagat ccctattctt agtttctatc tattttttcc
    24421 aggtttatca taatatccct ttcgatttga attttatatg tataaattta tttattacgt
    24481 ataaaaacgt ataaaaagtt aaaacctagt ggacaaagaa aaaagaaagg gaaaattttt
    24541 gagcaaatag aacttcgaac ttctaaaaaa attgaaactt tgatgagata ctaaaaaaaa
    24601 ataaagtaag gttctattag tatagaaaaa ttggcatgct atcggatcga ccgaaacaaa
    24661 atatataaca taaattaaat agtatgatta taccatccaa gggaaggaaa tcgagtaatt
    24721 acttcgttct tataactttg aaagtagtga tagatactat cgaggaacaa ctgttttgag
    24781 tcaattaatg aagttacttt ttcaaaagca ccatccagaa aaaattggat ggagtttttt
    24841 gaaatatttg aaatatgaga gagctcaacg ggacccccgc ccttttttct ctctttgttt
    24901 tgattgaggg ggttcgttga actcttacgc tttcatgtct acactgcagt ttatccgatt
    24961 attacaggga cgaacccaat ccggaatatg aaccataaaa gaaaatgcct attaaaccaa
    25021 tcacaggaat accagttaca gtacctatta tccaaagagg aatccttcca gtagtatcgg
    25081 ccatttctct cactttcctc cacatttaat caagtggtca tgctagagac ctaaacagtc
    25141 atagataatt atgagatgat atccttccga tggggtaaga gaatttctac tcttatttat
    25201 tattctacta ttctctttag cttctattaa ttgaagaaat aattagaaaa taaaacagca
    25261 agtacaaaaa tgagtaataa cccccagtag agactggtac gattcaattc aacattttgt
    25321 tcattcgggt ttgattgtgt catagctcta taattaattc gaattaggtt tatcgttgga
    25381 tgaactgcat tgccgatatt gaccccaaaa aagaaacggt aggtacagct aatccgtgaa
    25441 cagccaacca tcgtactgta aaaattggat aggttcgatc tatggtcatt ggggcctcct
    25501 aaaaagatct actaaattca tcgagttgtt ccaaaggatc aaaacggcca gttattaatg
    25561 gaattccttg tcggctctct gtaaaatatt catttgggcg agggcttcca aagacatcgt
    25621 aagctaaacc cgtgcttacg aataaccaac ctgcaatgaa tagggaaggt atagtaatgc
    25681 tatgaatgac ccaatatcga atactggtaa taatatcagc aaacgaacgt tctcctgtgc
    25741 ttccagacat gctgagctcc atatattctt gtacagtcaa agggggatcc gttttgtaaa
    25801 cgattggatc agtaaatgaa aatttactgg gattccgtcc ttgtgagatc gtcaatattg
    25861 taccaagggt tttgttaaag tataccgaat cagtatagct atccttcttc tgacgcagca
    25921 atgcaacttc aatcagtatc gaaacgaagc cctagataat ttatttcttc ttttcttttt
    25981 cttgtcgcta tagaaccgtg tatggaaaat ttgaattcga cgagttgctt tctaatctaa
    26041 taataattca tgaattggaa tccttttttt tttcatttta aaggaattgg ttagtcgtcc
    26101 agtatcaaga accggcagta gaaagtattc gatgaaagaa ggagacgaga acaacgaaaa
    26161 aataattgta ataatcaata ttcgtgatgt acgcattctt gtagtagatc aaaaaggcct
    26221 tcttgacatt taactacaaa gaggggtttc catttttttt tttttaatat tcattttcta
    26281 ttttatttct ccagaattgt ccaacgaatc tcttgattcg gaatcacgtg aggataggtg
    26341 aatgttttag atgatgaatg gatttctttt tctacttata ccactctatt tttgttagtg
    26401 ccatctatag ataataatat ataattatca tgattgataa ataattgata aattcaaaac
    26461 tttcaattga acgtattcat ttaatattgg tatgtatttt ttttattctt gtatctttca
    26521 aaaaatggaa ctttagggaa gtactttata accatatgat atgtataaaa aagtttattt
    26581 agttctttca tgcctactat aactagttat ttcggttttc tactagcggc tttaactata
    26641 acctcagttt tatttattgg tatgagtagg atacgactta tttgaaatga attgaatgaa
    26701 caattcataa aaaaatattt ttttggacta ttccatctct agtgtgtcaa tttccaattc
    26761 ttggttattg agatttatgg acaatatgga ttaatattta aggatagata ttacctctct
    26821 tttcccttta aacaaaaatt gaaatgattg aagtttttct atttggaatc gtcttaggtc
    26881 taattcctat tactttagct ggattattcg taactgcata tttacaatac agacgtggtg
    26941 atcagttgga cttttaatta attaacatcg tacctttttt gacctccttt taaatccgca
    27001 ggaggtcaaa ttagagtaga ttgttgttcc atttttctgt ataattttga cttaacaaaa
    27061 cagattcacg ctctgtagga tttgaaccta cgacattagg ttttggagac ctacgttcta
    27121 ccgaactgaa ctaagagcgc ttttttttat gacaaagaat ataagactgt aaggaaaaag
    27181 attctttttt taactccaat acatcttgaa tgcatatatt atcctattct atagcataat
    27241 cataatatag aataggataa aaatgaaaga ttaggtatgt ccaattttaa ttgatctcaa
    27301 ttgatccccc gttgttgctt agagacgaag taataggtag ggatgacagg atttgaaccc
    27361 gtgacatttt gtacccaaaa caaacgcgct accaagctgc gctacatccc tttcaattgg
    27421 tctacaatgt cattgtatag aatccatgta ttgttttcca catacttatt tcattttctt
    27481 catcgatata cacaacttat cttgctattt cttctttttg gtctcattaa taataaacat
    27541 atgaaaaaaa agtatatgaa acccgccttc gtgaatgttt gggtggaagc ggactatttt
    27601 gttcttctta agaaaaggaa gatcttatct atcaaatcgt tgtacatttc tatttgaatt
    27661 agggattcct accacataca aaacgaatgc aagtggcctt gaattacata aaccttagat
    27721 catgtatgta ttatacaata aacatttttt attacactaa agaaggagga tttaaaatgc
    27781 gagatttcaa aacatatcta tccgcggcac cggtaataag tactatatgg ttcgggtctt
    27841 tagcaggtct attgatagag atcaatcgtt ttttcccaga tgcgttgaca ttcccctttt
    27901 tttcattcta gttatttaca cgagagggtg aaaaaaaaag attagagata gaattcaaaa
    27961 tttgtgacta ctctcccctt cctcttttct cttttttttt taattccttt tttttaggat
    28021 aagttagaaa agagaaagaa taagtggatt caaacttagt gaaactggga cttgggtctt
    28081 gccttcaagt aaattaactt taagtaaatt tactttaatc aaattaagag aacagaagtt
    28141 aaaatatggt tagcgcaaca gtatcataca agatgattaa atgaaatact gtcctgcaat
    28201 tctaatctaa acttctaatc aaaatagagt ttaaaatcat tgtattactt attatttttt
    28261 aatatattgt ttgcaacaat aaaatttcgt gaaattttat ttcgagttaa caacttctat
    28321 tttttccttc ctttcttctt cgttttggat caaaaaaaaa aaaaagagaa gagttgattg
    28381 gataaaaaat ccaaaggagg ttcatggcca agggtaaaga tgcccgagta agggttattt
    28441 tggaatgtac cggttgtgtt cgaaacagtg ttaataagaa atcaacaggc atttcccgat
    28501 atattactca aaagaatcga cacaatacgc ctagccgatt ggaattgaga aaattttgtc
    28561 cctattgtta caaacatatg attcacgggg aaataaaaaa ataagtggaa ccgatcacct
    28621 acgcgtcacc tttccaaaga agatgaaaaa taacattata agatataata tgttaatact
    28681 taatatatat ttaatatata taaattaaaa taaaaatcct atttcttaat tctaaatcat
    28741 tatcattttt gatccaatcg aacgaaatag gattttcgaa ataaggaaaa taaacaaatc
    28801 atggataaat ctaagcgact ttttcttaag tccaagcgat cttttcgtag gcgtttgccc
    28861 ccgatccaat cgggggagcg aattgattat agaaacatga gtttaattag tcgatttatt
    28921 agtgaacaag gaaaaatatt atctagacgg gtgaatagat tgactttaaa acaacaacga
    28981 ttaattacta ttgctataaa acaagctcgt attttatctt cgttaccttt tcttagtaat
    29041 gaaaaacaat ttgaaaaaag cgagttggtc gttaaaatga ctggtcttag aaccagaaaa
    29101 aaataggctt actcttcaat tgaatcaaaa ttataatccg aactcaaacg tagattgaaa
    29161 gttttgttcg aaaaattcga aaacccagat ttgattgtcg taagaaaaaa acgaattttg
    29221 gaagaagaaa tctttttttt tattgaatat ttttgttcag tttcactact tgatcatatt
    29281 atgatcatat ttgatcatat tttatcatac taatttctat tctatcctct cagaattcat
    29341 tctccatcga attccatgta aatcattccg cgatggattc ttttcaatct ccttattttt
    29401 tgattttata atgtcattgc aaatcatata aagacaattc ctatttaata tggctatttg
    29461 cgccagtatt ttacgattaa gaagcaattg tttcttgtat agatttttta ttaatctact
    29521 ataactatag gatgccttat tctcacgaat tactgcattc atccgagtaa tccacaaacg
    29581 acgaaaatct cttttttgcc catctctatc ccgatgggcc gaaagcaaag ctcttatgtt
    29641 ttgttggata atagttcgag taagtcttga atgagctccg cgaaagcttg atgcgaataa
    29701 acgaattttt gttctacgcc ttcgagctat atatcctcgt ctaattctgg tcattgacta
    29761 aacgaaactt tgatgaataa ctaattgatt tcctttcttt cagttattct tgtcccctta
    29821 ataacaaaac ggaatcctcc aatgtataaa ataacaattc caacggcttt tgctactata
    29881 accttcccaa ccacaatttt tttctttttt ttcttctagg cattgtcgcc tagaagaaaa
    29941 attgtattga tactaagtat taaataaaaa aatagtaaat aaaatagtaa tagtaaataa
    30001 aatagtaaat agaaatagaa atggataaat aaatcatggg ttccgtcgtt tctatggtta
    30061 cttattaaac ggtgaggtct tctctataca ccggagcccc ttccttcatt gattttttta
    30121 atcaaataat caatgttatt attaacttgt acagttcaca ctctttggct ctactcatga
    30181 attcgctagt aataggcctt tcacaacgaa atttatctat acagtaacgg tatttaatta
    30241 tgaagattag ctgattagct gaccttctta gtccgttctt acaagaatag gggtataatt
    30301 tttcggcctt ttaatttaaa taagattttc cctgcttaag gtataatcat ttactaccaa
    30361 tagggaattc tttatcattt taaatgaaaa tttgaggtga ttgaatttcc accaatagaa
    30421 aacataaatt taatacacaa taacaataga agggatataa tagatctttt tttagatagt
    30481 gaaggggttt tttctatcct atccatctgt actgatcatg gatagtggaa aaaattgttt
    30541 cctttctttt gtcctaaccc acgatctgaa cgagtcgcac atacacccta gtacatgttc
    30601 ctcgccgctg aggacatccc ccaagagcgg gggatttggt gacatttctg attggctgtc
    30661 ttgtgtttct aataagttgt ttaatagttg gcatattgaa ttgtatgcat aatgggctgg
    30721 tttagatcga tcctaaccgg aagattatga attatttatg aattatttct aataatatta
    30781 atagaagatt attagaatat taaacccgag taataaaatc tcaaattgtt tgtgcaattt
    30841 gcgtgaaatt actgttattt tttatgaaac tgctacaaga tcaacaattc catgagcttg
    30901 ggcttctgtt gctgacataa aaacatccct ttccatgtct tcggatacga cccctaaggg
    30961 tttgcccgtt cttaatgcat aaacccgtgt gaggatttcg cgcagtttca gtagttcttc
    31021 tgcttccagg acaaattctc ctgtttgtgc ctcataaaaa ccggaaatag gttgatggat
    31081 cattaccctg atgatataag ataataaaag attattctat cccgaattag aaggtgacgc
    31141 gaagagataa agaataataa gaaaaaggct agaattgaac aaccgtacag gcattgtttg
    31201 cggattgcat acggcttcag actggaattc acttttacct ttcgtcgaag aaaaatatag
    31261 agctcagatt ggtaaatgat ccaataaccg cccttccctt gtgagtagtt aaaaaatact
    31321 acggtggctc cgttgcttta tttcatcggt aatttagcaa tcccaaagtt tctttttttt
    31381 ttcgtactct ttcataactc ataagacaaa tagtattaag agcccctcga tgtgaaaaca
    31441 aaaaggtttg taacgctgaa aaagaacccc gatggaaaag ataaaatcgg aaatcccctt
    31501 actatctcat actattcttt cgatatagaa tcgaatatta aattacaaaa aaaaaagaaa
    31561 aaaatttctt atatcgaatt cgaaatgcca tgctattatt acttaatatt cattcatatt
    31621 tcatatggcg aaggcatagt tttctttgtt ctttcaaata aaaaactcat tggcgccaag
    31681 cgtgcgggaa tgctagacgt ttagtaattt ttcctccgac caggataaaa gatcccattg
    31741 aagcggccaa tcccatacat actgtctgta catctggttg cacaaattgc atagtatcat
    31801 agatagctat tccaggtatt acccatccgc caggagagtt tataaacaaa tacaaatctt
    31861 tagtttcact ctccatactg agatatacca taagaccaat aagttgattt gagatctcgc
    31921 tatcaacatc ttgacctaaa aaaagtaatc tctctcgata aagtcgattg attaggataa
    31981 aattatatct cttagaaacc gtacatgcat cttttgctgc atacggttca acaaaagtcg
    32041 cgaaaaaaac aatcaatgtg tagcttccag ttctcctgtt tttgatagtg agtacttgct
    32101 aacttctctt ctaatgaaga ggttgttctt ccattttttt tttcaagaaa gaggggtttt
    32161 gacccgttta cctatatatt tacctatata tataattcat taaattaaac ttatcaaatt
    32221 aacttctcat tgatgtattc tttcatcgag atctaattca aatcacgatg acattttctt
    32281 gttcctgaat gggtttcttt aattcttctt taggtttgtg ctctactccg tgtaaagatc
    32341 tgtccgaatt tggatttgcc cgtatagggc aaatgccccc aagactccgt ctttttggta
    32401 caacttcttt ttttttaatt cataggacgg tttctgccac aaatatttga cgtattcggc
    32461 atattattcg attgattatg agtagcgatt ggaaactact cctatttcta ttttcctatt
    32521 tctaatttct attttcctat ttctatttat aaataaataa gtagtaatga tagatatatt
    32581 agtaattggt tttttataaa cggagcctgg atacttcatt tttttggcca actaagctaa
    32641 ccataaatta ttctaattga taatattaat ctggataccc ccaaaacata gatgaacttc
    32701 acgctccaaa ttttttataa ttaaataaat ctttcttggg tgaaacagag gatctctcga
    32761 tcgggggaga gaacgggaaa atcccgtatg acccaatata tctgacaagg cgcactatac
    32821 gtcaatccaa attgaatcgt cttccccagg atttctaaaa ggcacttttg gaacaccaat
    32881 aggcatgaaa tgaaagcaaa aaataagtac tatatttcac tttgatgtga aagcgtaaga
    32941 atgaatttat tgtcttaata atattggcct ttatcatatg ttatgcgtgg attcggtaag
    33001 ttcataaaaa taaaggaaga caaagtaata aagtaaaatt cttactaata gctcccttga
    33061 ataatgaaca aatctgtatg cagtcgttca tagaaaatgg ggtcaatccc ccattgcgta
    33121 ttggtgctta tcgggtatag aatagatctg cttctccgta tttctccaaa cagaattgtt
    33181 acattgtttg ttattaaaag aatagaaaaa ataataatcc tttctcagag ataatccaat
    33241 gaaaaagggg gggggtccat aacatagttt tttttccagt gcaataaagt tacatagtgt
    33301 ctatttttcg ttgataaagg ggtatttcta tgggtttgcc ttggtatcgt gttcatactg
    33361 tcgtattgaa tgatcccggt cgtttgctgt ctgtccatat aatgcataca gctttggttg
    33421 ctggttgggc cggttcgatg gctctatatg aattagccgt ttttgatccc tctgaccctg
    33481 ttcttgatcc aatgtggaga cagggtatgt tcgttatacc cttcatgact cgtttaggaa
    33541 taaccaattc atggggtggt tggagtatca caggaggaac tataacaaat ccgggtattt
    33601 ggagttatga aggtgtggct ggggcgcata ttgtcttttc gggcttgtgc ttcttggcag
    33661 ctatctggca ttgggtatat tgggatctag aaatcttttg tgatgaacgt accggaaaac
    33721 cctctttgga tttgcccaag atctttggaa ttcatttatt tctatcaggg gtggcttgtt
    33781 ttgggtttgg cgcttttcat gtaaccggat tgtatggtcc tggaatatgg gtgtctgatc
    33841 cttacggact aaccggaaaa gtacaatctg taaatccagc gtggggtgtg gagggttttg
    33901 atccttttgt tccgggagga atagcctctc atcatattgc agcggggacg ttgggcatat
    33961 tagcgggcct atttcatctt agtgtccgtc cgcctcaacg tctatacaaa ggattacgta
    34021 tgggaaatat tgaaaccgtc ctttccagca gtatcgctgc tgtctttttt gcagcttttg
    34081 ttgttgctgg aaccatgtgg tatggttcag ccactacccc cattgaatta tttggtccga
    34141 ctcgttatca atgggatcaa ggatacttcc agcaagaaat atatcgaaga gttggcgctg
    34201 ggctagccga aaatcaaagt ttatccgaag cttggtctaa aattcctgaa aaattggctt
    34261 tttatgatta catcggtaat aatccggcaa aaggtggatt gttcagagca ggagcaatgg
    34321 acaacgggga tggaatagct gttgggtggt taggtcatcc tatctttaga gataaagaag
    34381 ggcgtgaact ttttgtacgt cgtatgccta ctttttttga aacatttcca gttgttttgg
    34441 tagacggaga cggaattgtt agagccgatg ttccttttag aagggcagaa tcgaagtata
    34501 gtgtcgaaca agtaggtgta actgttgagt tttatggtgg cgaacttaat ggagttactt
    34561 atagtgaccc tgctactgtg aaaaaatatg ctagacgtgc tcaattgggt gaaatttttg
    34621 aattagatcg ttctactttg aaatcggatg gtgtttttcg tagtagtcca aggggttggt
    34681 ttacttttgg acatgcttcg tttgctcttc tcttcttctt tggacacatt tggcatggtg
    34741 ctcgtacctt gttcagagat gtttttgccg gcattgatcc agatttagac gctcaagtgg
    34801 aatttggagc attccaaaaa ttgggagatc caactacaag aagacaagta gtctgaattt
    34861 tatttttgta atttgacatt tgacatgggg tactggaaac atcttgattt gaatagtcgt
    34921 cttttccttg aatcttgctc tttttttatc cgggggagga tccctaataa acagatatgg
    34981 aagttataat tgtaaaccgc gatcgaatct atggaagcat tggtttatac attcctctta
    35041 gtctcgactc taggaataat ttttttcgct atcttttttc gagaaccgcc taaagttcca
    35101 actaaaaaga tgaaatgatt ttttattatc ttagttgaag taaagagcct cccaatattg
    35161 ggaggctctt tacttcaact agtccccatg ttcctcgaat ggatctctta attgttgaga
    35221 gggttgccca aaagcagtat ataaggcgta cccggtaaaa cttacaagta aaccagatat
    35281 agagatagcg accagggttg ctgtttccat tattatagaa tttcaagacc ataatgggtc
    35341 tatgataaga tgatttattt acaacggaat ggtatacaaa gtcaacagat ctcaattaat
    35401 acaaaatagg atttatggct acacaaaatg ttgagagtag ttctagatct ggtccaagac
    35461 gaactattgt aggggattta ttgaaaccat tgaattcgga atatggtaaa gtagctcctg
    35521 gatggggaac tactcctttg atgggtatcg caatggctct atttgcggta ttcctatcta
    35581 ttattttaga gatttataat tcttccgttt tactagatgg aatttcaatg aattagatgt
    35641 acaaggaccg ctaagtccta acttttcaat acaaagtgaa gcgttttggt ctgagatttt
    35701 ttttagtcca ttctattcta ttttggtagt tcgatcgtgg aatttctctt tctttctgta
    35761 tttttggaat atgagtgtgc gacttgttat aatggatcct attgatagta cagagaatgg
    35821 acctgtcatc ttgatataga ttgtttttta cctcgtcaga tatttattct agtatctgaa
    35881 gcacggaata tatgaaatcg attacgaagt tttagaacta tgattcatac ttaatgttca
    35941 gatcttgcga cccgactcaa aaaaaaattt caattcaaag agttagtttc aactcaaaga
    36001 gctagaaggt ataaattcaa agatttttct tctttcaaac gctttatcta tgcttttttg
    36061 atcaaagggc aaacccttct gtggattttt agttactaca tttcttcaac gcattgaata
    36121 agtgatgata caacgattct tactcaggga atcttaggtt tatagtttga agggtttatt
    36181 gaatcatcgt gggtctagca tgaatctgag gtttctttct atcgagttta ggatcttaac
    36241 aagaaaattc ctatcaataa taaagacaac aacagtaagg ctgcattaca tacaaatcaa
    36301 aataccaaaa aaatagagaa tatagaaaat tcaagaggcc tgtaaagagc aacactaaga
    36361 gatcaaagag ccgacttgaa attttggcat tataaccaca agaaagagtt gccggattag
    36421 tgttttttcg tatcgtaatc ttcagcgaag attgttgaat catagaatta agaagttttt
    36481 attacacata tccgtttcaa ctaatatttt ggtgtttctg tttgagctgt acgagatgaa
    36541 attctcatat acggttctca gagggggagt cttcccggtt tacctatctc aataaagtct
    36601 atgattggtt cgaagaacgc ctcgagattc aggcgattgc agatgatata actagtaaat
    36661 acgttccccc tcatgtcaac atattttatt gtttaggagg aattacgctt acttgttttt
    36721 tagtacaagt agctacgggg tttgctatga ctttttacta tcgtccgacc gttactgagg
    36781 cttttgcttc tgttcaatac ataatgactg aagctaactt tggttggtta attcgatcag
    36841 ttcatcgatg gtcggcaagt atgatggtcc taacgatgat cctgcacgta tttcgtgtgt
    36901 atctcaccgg tggctttaaa aaacctcgtg aattgacttg gattacaggt gtggttcttg
    36961 ctgtattgac cgcatctttt ggcgtaactg ggtattcttt accttgggac caaataggtt
    37021 attgggcagt caaaattgta acaggtgttc cggaagctat tcctgtaatc ggatcgcctt
    37081 tggtggagtt attacgtgga agtgctagtg taggacaatc tactttgact cgtttttata
    37141 gtttacatac gtttgtatta cctcttctta cttccgtatt tatgttaatg cacttttcaa
    37201 tgatacgtaa gcaaggcatt tctggtcctt tatagagaat atagatcata gatagttgta
    37261 atcaatcatt acattaatcg tttgggggag gaagatatag tatttcattg ctataaatat
    37321 ggattattaa aaaaaaaaaa aataagccat gtatttggat attttccttc aactccaaaa
    37381 aaaaattgaa tttctttttt ttttttttat tttatttgac atgaatagtt gaagcgaatt
    37441 ctcctaagat aaaaatggat tatgggagtg tgtgacttgg actattgatt tagccgtgca
    37501 gatatatgcc cttatccgcc acattggaat tcacaatcaa atgtgtcttt gttccaacaa
    37561 ctgcgaaagc cccatacaat acagagggta ggctggttcg ctcgaagaga atcttttcta
    37621 tgatcaaacc ccaatcatgt tgtgcatgaa gaggctccgt aaaatccagt cgaataagtg
    37681 atgtggtaga atccatattc tattttagct attttaccta atatttagtt ttacagattt
    37741 catttactta ttttaatagt atggaaatgc agccatttcc tttgcatcga ctcgatttac
    37801 gatactatcg gagtgaaaga agggatctac agaatgccag aggctaaact atattagtaa
    37861 caagtaaatc ctttgtatgt aaaaagtctc gatatttttt ggagatggag ataagtcaat
    37921 cgaaaggtct gagacggccc aaaaagcgga tcacctttgt aggcatactt gggtattgag
    37981 catttacctg taagaaccga attccttgca atggatgatt gcaactctgg aaaaaggaat
    38041 ctagtcaact ttttattaca taaaattatt acataaaatc attcatctat gtgtagatat
    38101 ggataacata tagattttat aacatctaga catatatatt tttataggga tgcttttggc
    38161 tcgtttgatt attgctcgag ctggatgatg aaaaattatc atgtccggtt ctttcggagg
    38221 atggatctat gaattcacct atcccaataa caaaaaaacc tgacttgaat gatcctgtat
    38281 tacgagctaa attggctaaa ggaatgggtc ataattatta cggagaaccc gcatggccca
    38341 acgatcttct atatattttt ccagtagtaa tcttaggtac tattgcatgt aatgtaggat
    38401 tagcggttct agaaccatca atgattggtg aacctgcaga tccatttgca actcctttgg
    38461 aaatattacc tgaatggtat ttctttcccg tatttcaaat acttcgtaca gtaccaaata
    38521 agttattggg tgttctttta atgatttcag tacctgcggg attattaaca gtaccctttt
    38581 tggagaatgt taataaattc caaaatccat ttcgtcgccc agtcgcgaca accgtctttt
    38641 tgattggtac tgtaatggcc ctttggctag gtattggagc aacattacct attgataaat
    38701 ctttaacttt aggtcttttt taaattgatt caattataaa atatcacgac atgcgtatct
    38761 agggaatagt cacttcaaag tgaattttcc ctagataaac aagctattca atgttaaaaa
    38821 aaaaggcgca aataaatcca ttggatttaa aatggattct ttggtaaatc aattgcgaaa
    38881 tgcttttctc tttctaaaat gtctaatata tgttttacgt cgtttatgcg aaaatattca
    38941 attttcataa gatcttcgtg gctcttattc aaaaggtcca ataatgtatg tatattggac
    39001 cttttcaggg aattatagat cttcggagtc aattctaatt ggtcaataaa aatatatttc
    39061 aatgcgagtt cttctttatt ttttcttagt ttaagtttag ccaatctatc atgaaaagta
    39121 aaaagaggta aagtaacctt gtgctgattt ttttctaaat gcgcgttttc ttcttctgca
    39181 tgtagaaaaa gaataaataa atcaatcaaa gttcgagagg cttcatgaag tgcttcttta
    39241 ggagttaaac ttccatttgt ccatatttcc agaaaaagta tctcttgctt ttcattcccg
    39301 tttccataag aatgaacact atgatttgca tttttaacag gcatgaatac agcatctaga
    39361 gggtaacttt catcttgaaa attatttggc ggttttagac gataaccgcg actcctctcg
    39421 atttgtaatt caatacgcaa atcaataggt tcggttagct tagctatatg ctgtttatta
    39481 tcaatgattt ccacagcagg tggtaggatg atgtcttgag cagttacata cccagggcct
    39541 ttgacacaaa tagatgcgtt acgagttcca tacaaattac ttctcaatac aatttctttt
    39601 aaattcatta aaatttcatg tactgattct tgaatacctg ctatagtaga aaattcgtgt
    39661 gctatttttt gagattttaa ttttgcacat gtgatacatg ttccttctat ttctccaagc
    39721 aaagctcttc gcatcgcaat gcctattgtg tcggcttgac ctttcataag tggagacaga
    39781 ataaaacgtc cataataaag acgcttactg gtggctcttg attcaacaca cttccactgt
    39841 agtgtccgag tagatattgt tactttctct cgaaccataa taatcttatt attttttttt
    39901 tatcaaatga ttgaattatt tatttctctt gaaatctctt caatgtttat ttttacacgc
    39961 gtcttttttt cggggctctg cagccattat gtggcatagg agttacatcc cggacgaaac
    40021 ttaatagtat accacttctg cgaatagctc ttaatgctgc atctcttccg agaccaggac
    40081 cttttatcat aacttctgct cgttgcatac cttgatccac tactgttcga atagcaattc
    40141 ctgctgcagt ttgagcagca aatggggtcc cccttcttgt gcctctgaac ccacaagtac
    40201 cagcggagga ccaagagatt actcgacccc ggacatccgt aacggtcaca atagtattgt
    40261 tgaaacttgc ttgaacatgg ataactcctt ttggtatttt acgcgcattc ctacgtgaag
    40321 cactgcgtcc attcctgcgt aaaccaattc tcggtaaagg ttttggcata ttttatcatc
    40381 ttataaatag aagtcatagg tttatggata tatccatttt gtgtcaaaat agatcttttt
    40441 atttttattt gtacattgga tcctttaggg agttcccggt tacaaagatt atccttgtct
    40501 ttgtttatgt ctgggattgg agcaaattac tataattcgt ccccgtctcc gtatcagtcg
    40561 acatttttca caaattttac gaacagaagc ccttattttc atatttgtca ttccttaatt
    40621 ttattaattt taaatataca tacttttttt tttgaagaaa ataagtttct ttcaattttg
    40681 aaatcttgaa ttgtatccct atgaaaatga aaggaatttt gaagttcaaa aaaactatct
    40741 aatcatttga atctttctcg cggagtctgt aaattagata ccgtctggtt gaaacagaat
    40801 tacttacttc cattttgacc ctatccccca gtaatatatg tataaaacca cgtcgggtct
    40861 ttctcgcaac ataacctaaa attgggtctt tattatctaa atgaatctgg gaacatacca
    40921 ttagaaagtg attcattaat ttaaccttcc cgaatcctct tttgttcttt cattccatct
    40981 aaacgcctct tgaagtatca actaatgtag gaggaatgtt attataaacc tgttccttcc
    41041 cccccccttt ttttttcaca aatagaaagc ccagatacaa ttttgaaaag attaccatat
    41101 ataacacaag atttctccac cgattctttc tagtcgagct tctcggtctg tcattatacc
    41161 ccgagaagta gaaagaatta caacccccat cccacccaaa attttaggaa tttgctgata
    41221 gttagaatag attcgtaaac cgggtcgact gatccgtttt aaatttagac ttgttttata
    41281 tggtcctttt ctattccttc tatgccgtag agttaaaacc aaaaaatttt tgttgccttc
    41341 ccggtgtttc ctcgcgtttt caataaaacc ctctcgtaaa agtattttaa taatgtgttc
    41401 cgtggtgtta gtagatctta ttcgaacgct tccttttcta tccatgtcag catttcgtat
    41461 agaggttatt atgtcagcaa tagtgtccct gcccatgata aactaaaatt attgttgctc
    41521 cctaatttgg atataattaa catattcatt tttttttttt ttttcttttt tttatgtttt
    41581 atgaaagaat tttattttta ttaaaggtat atgcgtgaaa tacaatctat taattaattt
    41641 gaattaaatc cagttcattc aactattata actatatcac ggtctaatct taaatgttat
    41701 ctttcgtctt atattttata ttatatgttt tatcttataa tacttcaggg gctaatgaaa
    41761 ctattttagt aaaatttaac tgtctcaatt ctcgggcaat cgcaccaaaa atgcgagttc
    41821 cttttggatt tccttcttga tcaatgacaa ctgcagcatt gtcatcatat cgtattatca
    41881 taccgttgtc tcgtttgagt tctttacagg tacgtacaat tacagctcta attacttctg
    41941 atttttctag aggtgaattt ggtactgctt ctttgatcac agcaacaata acgtcaccga
    42001 tatgagcata tcggcgatta ctagtcccta ggattcgaat gcacatcaat tctcgggctc
    42061 cgctgttatc tgctacattc aaatgggtct gagattggat catatcattt tgttatttca
    42121 atgcaaagga aaaaaaaaaa gaaatattat ttgttaaaaa aaaaaaaaga aacttgcaat
    42181 ttttttcatc tccaagacct ttgtatttta gtttcattct atattcctat cccgaaataa
    42241 tgaattgagt tcgtataggc atttttgacg ctgctattga aatagccttt ctggctatat
    42301 tttctgctac tccgctcatt tcataaagta ttcttcctgg tttaacaaca gctacccaat
    42361 attcgggaga tcctttcccc gaacccatac gtgtttccgt gggtcttacg gtaataggtt
    42421 tgtcgggaaa aatacgtacc catatttttc caccgcggcg cgcatttcgt gtcattgccc
    42481 gacgccctgc ttctatttgt cgagatgtaa tccaagcggg ttcaagtgct tgaagagcat
    42541 atctaccgaa agaaatacga ttacctcgat aagatattcc tttcatcctt cctctatgtt
    42601 gtttacggaa tctggttctt ttggggttat agttgatggt tgtttctcaa ttccatctct
    42661 actgcaaaac tggacatgag agtttcttct catccagctc ctcgcgaatg aaatgattaa
    42721 aaaaatatac attttaaaaa tatacataga gttgatgaat agtatactga atggtgggat
    42781 cctttcagat ttcatctaaa ttatttattg ttaatttatt tatttttatt ggaaatttgt
    42841 atattttatt tttagtttta tttagttttt taactaaaac taaataactg aagtataaac
    42901 tttttgtttt ttttttgtat tcttatttaa tatatttagt ctatttattt aatattattt
    42961 ataatattat tgagtatatt tatttagtat atttattatg atatcaaaat gatatcagag
    43021 atatcaaaat gatatcagat cgtttaacaa taacataaaa agcttcgcgg gcgaatattt
    43081 actctttcac tgtttccttc atttatcatt tataaggtta acccattaat tctcagaata
    43141 aatggattgt tccctggtgc atttcgccat cccctctaat gaatcattaa gattcatttt
    43201 caattttcaa taggatctta tgtattcaca ggttccgtcg ttcccatcac ttctcgatta
    43261 ctggttaggt cttaattgta caatggagcc ctaatgaaaa ttcttcttga gtcaattttc
    43321 tcagtctttc ttgacttgag gctcttgatt ttttttctat gaatatgaac agattcattt
    43381 aattatagat caatcggtaa tgatgcttta ttacattggc ttttatatga gatgactcat
    43441 agaccttaca tattggtatt ggaattttat atcattgata ttttttttct ctctttctct
    43501 cacctttcca tttatctgca aaattggaat tttgctttcc aattaataat ctaattcatt
    43561 tagcttttct ttatgtaaaa ataagattta agttgctaca atgatatgat taatatatca
    43621 tatcttgctt cttttatttg gatctagata atgcgaagcg atgagttggt tattcgttct
    43681 atacttatta gttcataatt aggggtcagt ccattttttt taatccttac cttaaaaaaa
    43741 accaaggagt cgcacacaac gagtcgcaca ctaagcatag caattatatc aaattcttaa
    43801 tctaattttt tattttattc aaccctatag aattagaata tagaattaga attgcttttt
    43861 tttgttcaat caaaacaaaa aaaaaaaaaa aaatgaaaga ggttgtcatt ttttgttctt
    43921 tcaatggatc gaacataaag acaagttaag taagggtcta ctattcctcg tttccaaatg
    43981 tccaaatttt tatgcctaat accccataaa tcgttataac tttataggaa caatactcaa
    44041 ttttagctcg aatggtttgg agaggaaccc taccttctct aatccattca acgcgtgcaa
    44101 tttcttttcc gtcaagacgc cccgcaattt gtatttgaat tccttttgta tcagcctgtt
    44161 cggtcaattc aatagctttt ttcattgctt tgcgaaacgg gactctattc tttaattgtc
    44221 cggctataaa ttctgcaaga atattagggt gcctgtaggg ctttttaatt cttttaatag
    44281 aaatgttgag cttttggttc acacaattaa gttctttttg tatatttagc tctaattctt
    44341 cgagtttttt acttttaggt ttagcttcta ttaataattt tgggaatccc atatatatta
    44401 taacctgaat cacatcaatt cgtttttgaa tctttatacg tgaaattccc tcaacaccag
    44461 aagaaagttt catatctttt tgtacataat tcttgataca gtttcttatt ttttgatctt
    44521 cttgtagacc ctcagaataa ttttttggtt gtgcaaacca aagagaatga tgaccttggg
    44581 tcgtaccaag tctgaaacca agtggattta ttttttgtcc cataatccct cactactata
    44641 catatcatga catgttatat ccgtggcttt tttttttttt tttttttccc cccccccccg
    44701 atttttttaa atatatggta tattatattt ttcatattcg tcatataatt cttcatccaa
    44761 ggatatatct ttcagtacaa tagttatatg acaagtcggt ctttttatta gagaattgcg
    44821 ccctcgagcc cgaggtttta gttttttcac agtagtaccc tcgttgactt cagctttact
    44881 aatgactaaa ctcgctttgt tgaagcccat attgtgacta gcgtttgccg ctgcagaata
    44941 aactaattta aaaatgggat aacatgcttg ataaggcatg agctcgagta tcataagtgt
    45001 ttcctcatag gaacgtccac gaatttgatc aattactctt cgcgctttgt gggcagacat
    45061 acatatatgt tgacttcgag catatacttc tgtatataaa tatgagttgt tccgtctctt
    45121 ctttatcata aggttcacct caaatcaaaa tccacaaact attaagtatt ttattattaa
    45181 tgtaaataga taagcatcta taatgtatat ttgcttttat taacgacgag atttattatc
    45241 attttttgca tgtccccgga aatttagagt aggtgaaaat tctcccaatt tatgacccac
    45301 catacgatct attatataaa taggtaaatg ttgctttcca ttatggatag caatagtatg
    45361 gccaatcatt gtgggtataa tggtagatgc ccgggaccac gttactatta tttctttttc
    45421 tgcctttgtg ttaagtttct ttatttttct taataaatga tttgctacaa aagggttttt
    45481 ttttagtgaa cgtgtcacag tcaatttctc ctattttttt ttttgaaaag acgaagaaac
    45541 aaattctatt ttctctccta tttactacgg cgacgaagaa tcaaattctc actatattta
    45601 ttcctttttc tacttcttct tccaagtgca ggataacccc aaggggttgc gggttttttt
    45661 ctaccaattg gggccctccc ttcaccaccc ccatggggat ggtctacagg gttcataacg
    45721 actcctctta ctataggacg cttacctagc caacatttag atccggctct acccaaactt
    45781 ttctggttca ccccagcatt ccctacttgt ccgactgttg ctgagcagtt tttggatatt
    45841 aaacgaacct ccccagaagg taattttaat gtggccgatt tcccctcttt tgcaatcagt
    45901 ttcgctacag cacctgcagc tctagctaat tgtccaccct ttccaagtgt gatttctatg
    45961 ttatgtatgg ccgtgcctaa gggcatatcg gttgaagtag attcttcttt ttgatcaatc
    46021 aaaacctctt cccaaaccgt acaagcttct tccaaagcat acggctttct gggtgtagat
    46081 gatgatatct atacagatgg atcttatcta tcatacaatg aagtaaagta ctacatgagt
    46141 ggatatatag gaatccaaat ctgccgaatc actcatgtta tgctcttcta catcctaggt
    46201 cttcccgttc cttcatctgg cttatgttct tcatgtagca ttcagatcga atgactctat
    46261 gaaattacgt cgatacttcc acatattagg ggtaacgtag gagacatctc tatttttccc
    46321 ccggggaatc tttagaattc ccactgctta gctttcaatt tgtctctgac catcaaatga
    46381 aatgtgaata acccgtcttc ctctctttga aacaaggggc gcttctggtt ctgtcggtgc
    46441 ttgaaacaat tttgtcttct ccatattact atatctctag agtcaataat tttatatgag
    46501 gaactactga actcaatcac ttgctgccgt tactcttcag ttttctgttg aggtctatcc
    46561 tgtagaggta ctcaaattgg atcagtgatc gatttctagg tttcgtcgta aacctaattg
    46621 gttacttcca attacgtaaa tcaatagttc aaaccgcact caaaggtagg gcatttccca
    46681 tttttatagg aacttctgta ccagaaataa tggtatctcc aattatagcc cctctgggat
    46741 gtaaaatata tctcttctca ccatccccat agtgtatgag acaaatgtat gcatttcgat
    46801 tagggtcgta ttctatggtt acgattctac catatatgtc tttttcattc cgtcgaaaat
    46861 cgattttacg gtatagacgc ttatgacctc cccctctatg ccttgcggta atgattcctc
    46921 tagcattacg tcctttacca caacgatgct gtccatagat caaattattt cgtgtattgg
    46981 attttacttg actgtctacg gctccattgc gtgtgctcgg ggtagaagtt ttgtataaat
    47041 atatcgccat gctattaagt attttgattt aagttctttt ctttctaaga ggtggaatag
    47101 aataacccgg ttgaagcgta atgatcatac gtttgtaatg cattgtatgt cccataatag
    47161 gtctcattct tctacccttt cccgggagtc gatggctatt catagctatt accttgacac
    47221 caaagaagag ttcgacccaa tgctttattt ctgtcctagt tgatcctaat tcgacattaa
    47281 aagtatattg atttttcccc aataactgaa tacttttgtc tgtaaatact gcatatttga
    47341 ttccatccat aaatctattt tcttccctat gagttctagt ctcagtaaga atgctagttc
    47401 ttactgttca tatgttatga tatgaatata ccacaccaat tcgttatgta tggatgatga
    47461 gattccattg atacagagcc aattccaata gacttattgg agggtcccat tggcgtgcat
    47521 ccagtaggaa ttgaacctac gaattcgcca attatgagtt gggcgcttta accattcagc
    47581 catggatgct tagcggggat cctcgtacat ggtgaataac caaattccaa ttgaaatgaa
    47641 atctttagga taaatcaatg caatttagga ggaatcaatg aaaggacatc aattcaaatc
    47701 ctggattttc gaattgagag agatattgag agagatcaag aattctcact atttcttaga
    47761 ttcatggacc caattcaatt cagtgggatc tttcattcac atttttttcc atcaagagcg
    47821 ttttataaaa ctcttggact cccgaatttg gagtatccta ctttcacgca attcacaggg
    47881 ttcaacaagc aatcgatatt tcacgatcaa gggtgtagta ctatttgtag tagtggtcct
    47941 tatatatcgt attaacaatc gaaagatggt cgaaagaaaa aatctctatt tgacagggct
    48001 tcttcctata cctatgaatt ccattggacc cagaaatgat acattggaag aatcctttgg
    48061 gtcttccaat atcaataggt tgattgtttc actcctgtat cttccaaaag gaaaaaagat
    48121 ctctgagagc tgtttcctgg atccgaaaga gagtacttgg gttcttccaa taactaaaaa
    48181 gtgtatcatg tctgaatcta actggggttc gcggtggtgg aggaactgga tcggaaaaaa
    48241 gaaggattct agttggaaga tatctaatga aaccgtcgct ggaattgaga tctcattcaa
    48301 agagaaagat atcaaatatc tggagtttct ttttgtatat tatatgaatg atccgatccg
    48361 caaggaccac gattgggaat tgtttgatca tctttctccg aggaaggggc gaaacataat
    48421 caacttgaat tcgggacagc tattcgaaat cttagtgaaa gactggattt gttatctcat
    48481 gtttgctttt cgtgaaaaaa taccaattga agtggagggg ttcttcaaac aacaaggagc
    48541 tgggtcaact attcaatcaa atgatattga gcatgtttcc catctcttct ctagaaagaa
    48601 gtgggctatt tctttgcaaa attgtgctca atttcatatg tggcaattcc gccaagatct
    48661 cttcgttagt tgggggaata atccgcacga atcggatttt ttgaggaaca tatcgagaga
    48721 gaattggatt tggttagaca atgtgtggtt ggtaaacaag gatcggtttt ttagcaaggc
    48781 acggaatata tcgtcaaata ttcaatatga ttccacaaga tctagtttcg ttcaaggaag
    48841 ggattctagc caattgaagg gatcttctga tcaatccaga gatcatttcg attccattag
    48901 gaatgaggat tcggaatatc acacattgat caatcaaaga gagattcaac aactaaaact
    48961 aaaagaaaga ttgattcttt gggatccttc ctttcgtcaa acggaacgaa cagagataga
    49021 atcagaccga ttccctaaat gcctttctgg atattcctca atgtcccggc tattcgcgga
    49081 aggtgagaag gagatgaata atcatctgct tccggaagaa attgaagaat ttcttgggaa
    49141 tcctacaaga tccattcgtt cttttttctc tgacagatgg tccgaacctc atctgggttc
    49201 gaatcctact gagaagtcca ctagagatca gaaattgttg aagaaagaac aagatatttc
    49261 ttttgtccct tccaggcgat cggaaaataa agaaatagtg aatatattca agataattac
    49321 gtatttacaa aataccgtct caattcatcc tatttcatca gatccgggat gtgatatggt
    49381 tctgaaggat gaactggata tggacagttc caataagatt tctttcttga acaaaaatcc
    49441 attttttgat ttatttcatc tattccatga tcggaacggg gggggataca cgttacacca
    49501 cgattttgaa tcagaaaaga gatttcaaga aatagcggat ctattcactc tatcaataac
    49561 cgagccggat cgggtgtatg ataagggatt tgcctttttt attgattcct acggattgga
    49621 tcaaaaacaa ttcttgaatg aggtattcaa ctccagggat gaatcgaaaa agaaatcttt
    49681 attggttcta cctcctattt tttatgaaga gaatgaatct ttttatcgaa ggatcagaaa
    49741 aagatgggtc cggatctcct gcgggaatga tttggaagat ccaaaacaaa aaatagtggc
    49801 taggaacaac ataatggagg cagtcaatca atatggattg atccgaaatc tgattcaaat
    49861 ccaatatagc acctatggaa gaaatgtatt gaatcaattc tttttaatga atagatccga
    49921 tcgcaacttc gaatatggaa ttcaaaggga tcaaatagga aatgatactc tgaatcatag
    49981 aactataatg aaatatacga ttaaccaaca tttatcgaat ttgaaacaga gtcagaagaa
    50041 atggttcgat cctcttattt ttctttctcg aaccgagaga tccatgaatt gggatcctaa
    50101 tgcatataga tacaaatggt ctaatgggag caagaatttc caggagcatt tggaacattt
    50161 catttctgag cagaagtttc aagtagtgtt cgatcgatta cgtattaatc aatattcgat
    50221 tgattggtct gaggttatcg acaaaaaaga tttgtctaag tcacttcgtt tctttttgtc
    50281 caagttactt ctttttttgt ccaagtttct tctctttttg tctaactcac ttcctttttt
    50341 ctttgtgagt ttcgggaata tccccattca aaggtccgag atccatatct atgaattgaa
    50401 aggtccgaat gatcaactct gtaatcagct gttagaacca ataggtcttc aaatcgttca
    50461 tttgaaaaaa tggaaaccct tcttattgga tgatcatgat acttcccaaa aatcgaaatt
    50521 tttgatcaat ggaggaacaa tatcaccatt tttgttcaat aagataccaa agtggatgat
    50581 tgactcattc catactagaa ataatcgcag gaaatctttt gataacacgg attcctattt
    50641 ctcaatgata tcccacgatc aagacaattg gctgaatccc gtaaaaccat ttcatagaag
    50701 ttcattgata tcttcttttt ataaagcaaa tcgacttcga ttcttgaata atctacatca
    50761 cttctgcttc tattgtaaca aaagattccc tttttatgtg gaaaaggccc gtatcaagaa
    50821 ttatgatttt acgtatggac aattcctcaa tatcttgttc attcgcaaca aaatattctc
    50881 tttgtctttg tgcggcggta aaaaaaaaca tgcttttttg gagagagata ctatttcacc
    50941 aatcgagtca caggtatcta acatattcat acctaatgat tttccacgaa gtggtgacga
    51001 aaggtataac ttgtacaaat ctttccattt tccaattcga tccgatccat tcgttcgtag
    51061 agctatttat tcgatcgcag acatttctgg aacacctcta acagagggac aaatagtcaa
    51121 ttttgaaaga acttattgtc aacctctttc ggatatgaat ctatctgatt cagaagggaa
    51181 gaacttgcat cagtatctca atttcaattc aaacatgggt ttgattcaca ctccatgttc
    51241 tgagaaagat ttaccatccg aaaagaggaa aaaacggagt ctttgtctaa agaaatgcgt
    51301 tgaaaaaggg cagatgtata gaacctttca acgagatagt gctttttcaa ctctctcaaa
    51361 atggaatcta ttccaaacat atatgccatg gttccttact tcgacagggt acaaatatct
    51421 aaatttgata tttttagata ccttttcaga cctattaccg atactaagta gcagtcaaaa
    51481 atttgtatcc atttttcatg atattatgca tggattagat atatcatggc gaattcttca
    51541 gaaaaaattg tgtcttccac aatggaatct gataagcgag atttcgagta agtgtttaca
    51601 taatcttctt ctgtccgaag aaatgattca tcgaaataat gagtcaccat tgatatcgac
    51661 acatctgaga tcgccaaacg ttcgggagtt cctctattca atccttttcc ttcttcttgt
    51721 tgctggatat ctcgttcgta cacatcttct ctttgtttcc cgagcctcta gtgagttaca
    51781 gacagagttc gaaaaggtca aatctttgat gattccatca tacatgattg agttgcgaaa
    51841 acttctggat aggtatccta catctgaact gaattctttc tggttaaaga atctctttct
    51901 agttgctctg gaacaattag gagattttct agaagaaata cggggttctg cttctggcgt
    51961 caacatgcta tggggtggtg gtcccgctta tggggtcaaa tcaatacgtt ctaagaagaa
    52021 atttttgaat atcaatctca tcgatctcat aagtatcata ccaaatccca tcaatcgaat
    52081 cactttttcg agaaatacga gacatctaag tcatacaagt aaagagattt attcattgat
    52141 aagaaaaaga aaaaacgtga acggtgattg gattgatgat aaaatagaat ccttggtcgc
    52201 gaacagtgat tcaattgatg ataaagaaag agaattcttg gttcagttct ccaccttaac
    52261 gacagaaaaa aggattgatc aaattctatt gagtctgact catagtgatc atttatcaaa
    52321 gaatgactct ggttatcaaa tgattgaaga gccgggatcc atttacttac gatacttagt
    52381 tgacattcat aaaaagtatc taatgaatta tgagttcaat acaccctgtt tagccgaaag
    52441 acggatattc cttgctcatt atcagacaat cacttattca caaacctcgt gtggggcgaa
    52501 tagttttcat ttcccatctc atggaaaacc cttttcgctc cgcttagccc tatccccctc
    52561 taggggtatt ttagtgatag gttctatagg aactggacga tcctatttgg tcaaatacct
    52621 agcgacaaac tcctatgttc ctttcattac agtatttctt aacaagttcc tggataacaa
    52681 gcctaagggt tttcttattg atgatagtga cgatattgat gtgagtgacg atctcgaccg
    52741 tgaccttgat acggagctgg agcttctaac taggatgaat gcgctaacta tggatatgat
    52801 gccggaaata gaccgatttt atatcaccct tcaattcgaa ttagcaaaag caatgtctcc
    52861 ttgcataata tggattccaa acattcatga tctggatgtg aatgagtcga attacttatc
    52921 ccttggtcta ttagtgaact atctctccag ggattgtgaa agatgttcca ctagagatat
    52981 tcttgttatt gcttcgactc atattcccca aaaagtggat cccgctctaa tagctccgaa
    53041 taaattaaat acatgcatta agatacgaag gcttcttatt ccacaacaac gaaagcactt
    53101 tttcactctt tcatatacta ggggatttca cttggaaaag aaaatgttcc atactaatgg
    53161 attcgggtcc ataaccatgg gttccaatgt acgagatctt gtagcactta ccaatgaggc
    53221 cctatcaatt agtattacac agaagaaatc aattatagac actaatataa ttagatctgc
    53281 tcttcataga caaacttggg atttgcgatc ccaggtaaga tcggttcagg atcatgggat
    53341 ccttttctat cagataggaa gggctgttgc acaaaatgta tttctaagta attgccccgt
    53401 agatcctata tctatctata tgaagaagaa atcatgtaat gaaggggatt cttatttgta
    53461 caaatggtac ttcgaacttg gaacgagcat gaagaaattg acgatacttc tttatctttt
    53521 gagttgttct gccggattgg ttgctcaaga cctttggtct ctacccggac ccgatgaaaa
    53581 aaatgggatc acttattatg gacttgttga aaatgattcg gatctagttc acggcctatt
    53641 agaagtagaa ggcgctctgg tgggatcctc acggacagaa aaagattgca gtcggtttga
    53701 taatgatcga gtgacattgc ttcttcggcc cgaaccaagg agtcccttag atatgatgca
    53761 aaatggatct tgttctatcc ttgatcagag atttctctat gaaaaatacg aatcggagtt
    53821 tgaagaaggg gaaggagaag gagtcctcga tccacaacag atagaggagg ttttattcaa
    53881 tcacatagtt tgggctccta gaatatggcg cccctggggc tttctatttg attgtatcga
    53941 aaggtccaat gaattgggat ttccctattg ggccaggtca tttcgggaca agcggatcat
    54001 ttatgatgaa gaggatgagc ttcaagagaa cgattcggag ttcttgcaga gtggaaccat
    54061 gcagtaccag acaggagata gatcttccaa agaacaaggc ttttttcgaa taagccaatt
    54121 catttgggac cctgcggatc cactcttttt cctattcaaa gatcccccct ttgtctctgt
    54181 gttttcacat caagaattct ttgcagatga agagatgtca aaggggcttc ttacttccca
    54241 aaccaatcct cctacatcta tatataaacg ctggtttatc aagaatacgc aagaaaagca
    54301 cttcgaattg ttgattcatc gccagaaatg gcttagaacc aatagttcat tatctaatgg
    54361 atttttccgt tctaatactc tatccgagag ttatcagtat ttatcaaatc tgttcctatc
    54421 taacggaacg ctattggatc aaatgacaaa ggcattgttg agaaaaagat ggcttttccc
    54481 ggatgaaatt ggattcatgt aataggagaa aggtttccca ttccttagcc tgaaagatat
    54541 gtggccatga aatagagatt aagtggaaca gaattgactg ggtggtaaag tcgtggaaac
    54601 acctctttct tccatatttt ggacatggaa gaatatgtta ctgctgaaac atggaagaat
    54661 tgaaatctta gatcaaaaca ctatgtatgg atggtatgaa ctgcctaaac aagaattctt
    54721 gaacagcgag caaccagagc tattactcac tacatcaaaa aatttccatt aatgaaagat
    54781 gtaaatccat tggaaaatca aaaatacgta tgtcggatga aatggtggtt gttgctatct
    54841 gctccaataa cgaatcattg gtttaactga ataactaaat gaataactaa ataaaataga
    54901 tagacccttc tcttcgtctc aggtcgatgg atcttctcaa ttggaagatc ccctatatgg
    54961 ataatacaca ttccagttga ccgggcctaa ttctaattgt tttgttccga agcaaagata
    55021 tccacggggc ggttcgtcct attcagatat tcacgaccaa gaagtactgg attctctttc
    55081 ggatagtccc tgaaaggaga aggaaggatg gaatgccaac agacgcctat tattgaattc
    55141 acccgacccg atagtaccca tttttttttg ggaccatcca gtgccaaagt cactgaatgg
    55201 gtaagtcgcc aatccctaaa acggactatg taatgtactt tatctgttgg gtgacgggcg
    55261 ggcattttac cagaggtttc tattgtatca atctaccctt gtgtaattcc tgttgaagca
    55321 tatactcggg ggtggttgca gggcgaacga tttcaaagcg gactccccat tcattagata
    55381 gagaagatca ccaagatttc gtgatccgct gccgaactta ttccaattca atgagcattc
    55441 tcaatattat gccttgaaga ggactcgaac ctccacgctc tttagcacga gattttgagt
    55501 ctcgcgtgtc taccatttca ccaccaaggc atcttgaaag tgaatcgtat tccatgaata
    55561 tgatatctat ctagtgtgat gtatggaata tatgacaaag gtggagtgtt ggagtatttc
    55621 tattgatcgt tcatgtcata taggcccgag tcggacatcc aattgcttcg atttgaatta
    55681 tccggaacat gccttatata tatattatag caaaaaatta tagcaaaaaa atggacaatc
    55741 aaacccattt ctcgattcaa tagacgccca aagaggtgaa tagaataggg tcccaaataa
    55801 ggagagatat atatgtaaaa agcaggtccg attacgccta ttcctaatcc taaatggaat
    55861 gtaacgacgg agggatccat atgtaaacat agtatctatt tagatacgat agtatctatt
    55921 tagatacgct cgaatgaccc cttctcataa tgagaatgta tataagccta ttccggtctg
    55981 gtccggtatg gaatgaactt ataatcatgg aatcgactcg attatcagat tataagttca
    56041 taaccctagc ccattcccat tttgggcgga acagatctac taattctttg attccagtta
    56101 gtaagaggga tcttgaacta agaaataggt tctagaagct aaaaaagggt atcttgagca
    56161 atttcaataa tcgggttcat tgatattcct ggtatagtag atgctattac acatacaatc
    56221 atactcaatt cgatggaatt gtttgatctt aaaggggatc ttctataatt tcgcacgtga
    56281 ggggttattt cttggtttcg tccagtcatt aataacttga ttatttttag ataatagtag
    56341 atagaaacaa cgctcgtaag gagtcctatt gaaaccaaga aatataggcc tgcctgccat
    56401 ccacaccaga ataaatggag ttttccgaaa aaacctgcta gtggaggaag acctcctagg
    56461 gataagagac atagggctaa agagagagcc aaaaaaggat ctttcgtgta taatcctgca
    56521 taatctcgaa tgttatcagt tccggtacgt agaccaaata atacaatgca agcaaaagtt
    56581 cctagattca tggagatata gaagaagata taagttatca tgcttgcata tccaccattt
    56641 gagtctccaa caatgattcc aataattaca tatccgattt gacctatgga cgaatatgca
    56701 agcatacgtt tcatgcttgt ttgagtaata gcaatgagat tccccactat catgctcaga
    56761 atagctagga tttccagaag aagatgccat tcgtttgatg agaaataaaa aggaatatcg
    56821 aaaattcgag tggctgaagc tgaagcagct actttcgaag taacagaaag aaaagcaacg
    56881 actggagtgg gagagtcaga gtcgaaaaga ggattcctca cttctttctc tcattcaaaa
    56941 ccgtgcatga gactttcatc tcgcacggct cctaagtgat aaaagaaaga agaactcatc
    57001 ttctttcttt tttgattacc ttcctcgcgt atgtataaga ccgaatccat tcgatttcta
    57061 aaaaggatta ctaatcctta acttttcgag gaatccttca tcagtggttg tgaatgacca
    57121 atttttctca atctttctga cttgctccta cggaaccaag aggtcgaaaa gattgagaaa
    57181 tagaaccatc tgatttgatt cgttctcaat agccatgaga tgatcatctt agggtgatcc
    57241 ttttgtcgac ggatgctcct attacactcg tagtctctga aggatgagaa ccaactatgt
    57301 agcatctaca tcgagaattt aaatattgta tacgtcatta gtccgatctt ttgtaggagc
    57361 tacccgtaat aacgaacttg caaaatgaat cttgtttatc ataaagagat tcgttgttcc
    57421 tgacgctgct tcaccttaat tgttatttga acaagtaaaa gttatgtctt ggtccgagtg
    57481 cggatagcat ttctcttctg catgtccatg gagttttgaa aaatccaagc atctcagaga
    57541 tagatagaga agtaggaatt tttcgaacga accgcactcc ttcgtatacg tcaggagtcc
    57601 attgatgaga aggggctagg gaaagcttga acccaattcc tacagtgatg aatataagcg
    57661 caattgaaat tcctggggag ttatacattt gtgtattgat aagaccattc actatttctt
    57721 gaagctcgat ctctcccccg gacgaaccat atagccaaga gaaaccatga accagaatag
    57781 aagagcttgc cccacccatg agtaaatatt tcatagtagc ctcattagac cgtacatctt
    57841 tcttggtata tccagataat aggtaggagc ataaactgaa acattctgga gctacaaaga
    57901 tagttattaa atcgttagca ccgcataaaa acattcctcc tagagtagct gttaatacga
    57961 ataagagaaa ctctgttata gccatttctg tacattcaat gtactctacg gatagaggaa
    58021 tacatagagt tgaacatagt aaaataagaa attgaaatat ttcgttgaaa ttgttcgttt
    58081 ggaaatttcc cgaaaagcta atcataggtt cttctctcca tcggaacaat agggccgtta
    58141 tactcattac taaacttgtt gaagagatga aataaaacca aggtatatct ttttgatcag
    58201 aagttgaatc gatcatcaga agaagaatta ggccaaaaat taggatacat tctgggaaaa
    58261 tcaaacttcc atcgaagaga agcaaatgaa aggctttcat aaaaattctc gtagaatcga
    58321 gaatgaagtt ttcattctgt acatgccaga tcatgaatta gtaactgcat ccaatctcca
    58381 aaaaatccca attgtttcga actttctctt tttttttttg gaatggaata tttacggaat
    58441 ccccataaat aggatcaaac cttattccat ggtatttacc ttttttttat tcttatctta
    58501 agcaagtccc cgagagggct taattgatcc atgatttatg tttcatcttt cgtttccttt
    58561 tcgtttgttt cgagaaatat agcgatcaat tccgattctt tctttttcta ttgattcttt
    58621 tccgatcgag atgtatggct ccatgagtct atatagatcc tgttcatgga ttaacgaaaa
    58681 tgcgcaaaag ctctatttgc ctccgccatt ctatgagtct cttccttttt gcgtatggca
    58741 tcgccactcc ctttggcagc atccactaat tcggaactta atttgaaagc catatttcgg
    58801 cccggacgtt ttcgggatgc ccctaataac caacgaatgg caagtgcttt tccttgtgtg
    58861 gatcctattt caatgggaac ttgatgagtc gatccgccta cacgtcttgc ttttactgct
    58921 atatcgggag ttactccacg tattgcttga cgtaaaacag atagtggatt tgtttctgtc
    58981 ttttgttgaa tctttttcat ggctcgatag ataatttgat aagccaatga tttttttccg
    59041 tgtttcagaa tacggttaac caacatgtta actaatcgat tacgataaat tggatcggat
    59101 tttgcagttt tttcttctgc agtacctcga cgtgacatga gcgtacaagg ggttctcaag
    59161 aatcagtttt ccttttataa gggctaataa aatcatttat tttggctttt tgaccccata
    59221 ttgtagggtg gatctcgaaa gatatgaaag acctccctcc aagccgtaca tacgactttc
    59281 atcgaatacg gctttccaca gaattctata tgtatctatg agattgagta tggaattcta
    59341 tttactcact ttaaattgag tatccgtttc cctccttttc ctgctaggat tggaaatcct
    59401 gtattttaca tatccatacg atggagtcct tgggtttccg aaaaagtgta aaaagaagtg
    59461 ctttgaatca ttgctatttg actcggacct gctctaaaaa agtcgaggca tttcgaattg
    59521 tttgttgaca cggacaaagt caaggaaaac ctctgaaatt cttccaatat tggaccttgg
    59581 acatataaga gttccgaatc tctttagtaa agaagatctt ttgtctcatg gtagcctgct
    59641 ccagtcccct tacgaaactt tcgttattgg gttagccata cactttacat gtttctagcg
    59701 attcacatgg catcatcaaa tgatacaagt cttggataag aatctacaac gcactagaac
    59761 gcccttgttg acgatccttt actccgacag catctagggt tcctcgaaca atgtgatatc
    59821 tcacaccggg taaatcctta acccttcccc ctcttactaa gactacagaa tgctcttgta
    59881 aattatggcc aataccgggt atataagcag tgatttcaaa tcccgaggtt aatcgtactc
    59941 tggcaacttt acgtaaggca gagtttggtt ttttgggggt aatagtggaa aagttgacag
    60001 ataagtcatc cttactgcca ctctacagaa ccgtacatga gattttcacc tcatacggct
    60061 cctcgttcaa ttctttcgaa gtcattggat ccctttcctc gttcgagaag ctcctccctt
    60121 catccactcc gtccccaaga gtaactagga caaatttagt cacgttttca tgttccaatt
    60181 gaacactttc tttttttgat tattctcaaa ggagaagatt cttcttttta ccaaacatat
    60241 gtggatccaa tcacgatctt ataataagaa caagagatct ttctcgatca atccctttgc
    60301 ccctcattct tcgagaatca gaaagatttt tttcaagttt gaatttgttc atttggaatc
    60361 tgggctcttc tacttcattt ttatttattt cttttttatt cccttccgtc attccttaag
    60421 tcccataggt ttgatcctgt agaatctgac ccattttctc actgagcgaa gggtacgaaa
    60481 taaatcagat tgatttttcg atcaaaagta ctatgtgaaa tcttcggttt tttcctcttt
    60541 cgctagccct atcctatagg cctataggta cagcctttga atcaatagag attcttctat
    60601 atctgtatga atcgatatta ttacattcca attccttccc gacacctccc aaggaaaatc
    60661 ccgaattgga tcccaaattg acgggttagt gtgagcttat ccatgcggtt atgcactctt
    60721 cgaataggaa tcctttttct gaaagatcct ggctttcgtg ctttggtggg tctccgagat
    60781 cctttcgacg acctatgttg tgttgaaggg atatctatat gatccgatcg attgcgtaaa
    60841 gcacgcggta gcaacggaac cggcgaaagt ataaagaaaa gacagttctt ttctattcta
    60901 tctattatat tagtattagt attttctatt agtaatagat tagtattagt tagtgatcct
    60961 ggctcagtga gtcctttgtg atgaactgtt ggcaccagtc ctacattttg tctctgtgga
    61021 ccgaggagaa aggggcttag cgagaagagg attgtaccat gagagaagca aggaggtcaa
    61081 cctctttcaa atatacaaca tggattctag caatgcaatg tagttggact ctcatgtcga
    61141 tccgaatgaa tcatcctttc cacggaggta aatctttgcc tgctaggcaa gaggatagca
    61201 agttacaaat tctgtctcgg taggatatat atgtatttta tttctattac tatgaaattc
    61261 ataaatgaag tagttaataa atgaaatagt taatggtggg gttaccatta tcctttttgt
    61321 agtgacgaat cttgtatgtg ttcctaagaa aaggaatttg tccatttttc ggggtctcaa
    61381 aggggcgtgg aaacacataa gaactcttga atggaaaaga gatggaactc cagttccttc
    61441 ggaaatagta agatctttgg cgcaagaaga aggggttgat ccgtatcatc ttgacttggt
    61501 tctgatttct ctattttttt aagaataccg agtcggggtc ttctcctacc cgtatcgaat
    61561 agaacatgct gagccaaatc ttcttcatgt aaaacctgct ttatttagat cgggaaaatc
    61621 atacgctttt atgaaaccat gtgctatggc tcgaatccgt agtcaatcct atttccgata
    61681 ggagcagttg acaattgaat ccaatttttc ccattatttt cgtatccgta atggtgcgaa
    61741 aagaaggacc gactccaagt tgttcaaaag tagtggcgtt gagtttctcg accctttgcc
    61801 ttcggattag tcagttctat ttctcgatgg gggcaaggga agggatataa ctcagcggta
    61861 gagtgtcacc ttgacgtggt ggaagtcatc agttcgagcc tgattatccc taaacccaat
    61921 gtgagttttt ctattttgac ttgctccccc gccgtcgtga tcgaatggat aagaggctcg
    61981 tgggattgac gtgagggggt agggacggct atatttcttg gagcgaactc taagcgaata
    62041 tgaagcgcat ggatacaagt tatgccttga aatgaaagac agttccgaat cagctttgtc
    62101 tacgaataag gaagctataa gtaatgcaac taagaatctc atggagagtt cgatcctggc
    62161 tcaggatgaa cgctggcggc atgcttaaca catgcaagtc ggacgggaag tggtgtttcc
    62221 agtggcggac gggtgagtaa cgcgtaagaa cctgcccttg ggaggggaac aacagctgga
    62281 aacggctgct aataccccgt aggctgagga gcaaaaggag gaatccgccc gaggaggggc
    62341 tcgcgtctga ttagctagtt ggtgaggcaa tagcttacca aggcgatgat cagtagctgg
    62401 tccgagagga tgatcagcca cactgggact gagacacggc ccagactcct acgggaggca
    62461 gcagtgggga attttccgca atgggcgaaa gcctgacgga gcaatgccgc gtggaggtag
    62521 aaggcctacg ggtcgtgaac ttcttttccc ggagaagaag caatgacggt atctggggaa
    62581 taagcatcgg ctaactctgt gccagcagcc gcggtaatac agaggatgca agcgttatcc
    62641 ggaatgattg ggcgtaaagc gtctgtaggt ggctttttaa gtccgccgtc aaatcccagg
    62701 gctcaaccct ggacaggcgg tggaaactgc caagctggag tacggtaggg gcagagggaa
    62761 tttccggtgg agcggtgaaa tgcgtagaga tcggaaagaa caccaacggc gaaagcactc
    62821 tgctgggccg acactgacac tgagagacga aagctagggg agcgaatggg attagatacc
    62881 ccagtagtcc tagccgtaaa cgatggatac tgggcgctgt gcgtatcgac ccgtgcagtg
    62941 ctgtagctaa cgcgttaagt atcccgcctg gggagtacgt tcgcaagaat gaaactcaaa
    63001 ggaattgacg ggggcccgca caagcggtgg agcatgtggt ttaattcgat gcaaagcgaa
    63061 gaaccttacc agggcttgac atgccgcgaa tcctcttgaa agagaggggt gccttcggga
    63121 acgcggacac aggtggtgca tggctgtcgt cagctcgtgc cgtaaggtgt tgggttaagt
    63181 cccgcaacga gcgcaaccct cgtgtttagt tgccaccgtt gagtttggaa ccctgaacag
    63241 actgccggtg ataagccgga ggaaggtgag gatgacgtca agtcatcatg ccccttatgc
    63301 cctgggcgac acacgtgcta caatggccgg gacaaagggt cgcgatcccg cgagggtgag
    63361 ctaactccaa aaacccgtcc tcagttcgga ttgcaggctg caactcgcct gcatgaagcc
    63421 ggaatcgcta gtaatcgccg gtcagccata cggcggtgaa ttcgttcccg ggccttgtac
    63481 acaccgcccg tcacactatg ggagctggcc atgcccgaag tcgttacctt aaccgcaagg
    63541 agggggatgc cgaaggcagg gctagtgact ggagtgaagt cgtaacaagg tagccgtact
    63601 ggaaggtgcg gctggatcac ctccttttca gggagaggta atgcttgttg ggtattttgg
    63661 tttgacactg cttcacaccc caaaagaagg gagctacgta tgagttaaac ttgtcgacgg
    63721 aagtcttctt tcgtttctcg acggtgaagt aagaccaagc tcatgagctt attatcctag
    63781 gtcggaacaa gttgatagga tccccctttt tttcgccccc atgtcgccac gcgggaggga
    63841 catgggggcg aaaaaaggaa agagagggat ggggtttctc tcgcttttgg catagcgggc
    63901 ccccggcgag aggcccgcac gacgggctat tagctcagtg gtagagcgcg cccctgataa
    63961 ttgcgtcgtt gtgcctgggc tgtgagggct ctcagccaca tggatagttc aatgtgctca
    64021 tcagcgcctg accctgagat gtggatcatc caaggcacat tagcatggcg tacttctcct
    64081 gttcgaaccg gggtttgaaa ccaaacttct cctcaggagg atagatgggg cgattcgggt
    64141 gagatccaat gtagatccaa ctttctattc actcgtggga tccgggcggt ccggggggga
    64201 ccaccatggc tcctctcttc tcgagaatcc atacatccct tatcagtgta tggacagcta
    64261 tctctcgagc acaggtttag gttcggcctc aatgggaaaa taaaatggag cacctaacaa
    64321 cgtatcttca cagaccaaga actacgagat cgcccctttc attctggggc gacggaggga
    64381 tcgtaccatt cgagcctttt tttttcatgc ttttcccgga ggtctggaga aagctgcaat
    64441 caataggatt ttcctaaccc tcccttcccg aaaggaagaa cgtgaaattc tttttccttt
    64501 ccgcagggac caggagattg gatctagccg taagaagaag gcttggctga taaataactc
    64561 acttcttggt cttcgacccc ctcagtcact acgaacgcct ccgatcagtg caatgggatg
    64621 tgtctatttg tctatctctt ggctcgaaat gggagcaggt ttgaaaaagg atcttagagt
    64681 gtctaaggtg gggccaggag ggtctcttaa cgccttcttt tttcttctca tcggagttat
    64741 ttcaaaaaga cttgccatgg taaggaagaa ggggggaaca agcacacttg gagagcgcag
    64801 tacaacggag agttgtatgc tgcgttcggg aaggatgaat cgctcccgaa aaggaatcta
    64861 ttgattctct cctaattggt tggaccgtag gtgcgatgat ttacttcacg ggcgaggtct
    64921 ctggttcaag tccaggatgg cccagctgcg ccaaagaaaa gaatagaaga agcatctgac
    64981 tccttcatgc atgctccact tggctcgggg ggatatagct cagttggtag agctccgctc
    65041 ttgcaattgg gtcgttgcga ttacgggttg gatgtctaat tgtccaggcg gtaatgatag
    65101 tatcttgtac ctgaaccggt ggctcactct ttctaagtaa tggggaagag gaccgaaaca
    65161 tgccactgaa agactctact gagacaaaga tgggctgtca agaacgtaga ggaggtagga
    65221 tgggcagttg gtcagatcta gtatggatcg tacatggacg atagttggag tcggcggctc
    65281 tcctagggtt ccctcatctg ggatccctgg ggaagaggat caagttggcc cttgcgaaca
    65341 gcttgatgca ctatccccct tcaacccttt agcgaaatgc ggcaaaagga aggaaaatcc
    65401 atggaccgac cccatcgtct ccaccccgta ggaactacga gatcacccca aggacgcctt
    65461 cggcatccag gggtcgcgga ccgaccatag aaccctgttc aataagtgga aggcattagc
    65521 tgtccgctct caggttgggc agtaagggtc ggagaagggc aatcactcat tcttaaaacc
    65581 agcattctta agccaaagag tggggcggaa agggggaaag ctctccgttc ctgggtttcc
    65641 tgtagctgga tcctccggaa ccacaagaat ccttagttag aatgggattc caactcagca
    65701 ccttttgaga ttttgagaag agttgctctt tggagagcac agtacgatga aagttgtaag
    65761 ctgtgttcgg gggggagtta ttgtttatcg ttggcctcta tggtagaatc agtcgggggg
    65821 cccgagaggc ggtggtttac cctgtggcgg atgtcagcgg ttcgagtccg cttatctcca
    65881 actcgtgaac ttagccggta caaagctata tgatagcacc caatttttcc gattcggtag
    65941 ttcgatctat gatttatcat tcatggacgt tgataagatc cttccattta gcagcacctt
    66001 aggatggcat agccttaaag ttaagggcga ggttcaaacg aggaaaggct tacggtggat
    66061 acctaggcac ccagagacga ggaagggcgt agtaagcgac gaaatgcttc ggggagttga
    66121 aaataagcgt agatccggag attcccgaat aggtcaacct ttcaaactgc tgctgaatcc
    66181 atgggcaggc aagagacaac ctggcgaact gaaacatctt agtaaccaga ggaaaagaaa
    66241 gcaaaagcga ttcccgtagt agcggcgagc gaaatgggag cagcctaaac cgtgaaaacg
    66301 gggttgtggg agagcaatac aagcgtcgtg ctgctaggcg aagcggtgga gtgctgcacc
    66361 ctagatggcg agagtccagt agccgaaagc atcattagct tatgctctga cccgagtagc
    66421 atggggcacg tggaatcccg tgtgaatcag caaggaccac cttgcaaggc taaatactcc
    66481 tgggtgaccg atagcgaagt agtaccgtga gggaagggtg aaaagaaccc ccatcgggga
    66541 gtgaaataga acatgaaacc gtaagctccc aagcagtggg aggagcccgg ggctctgacc
    66601 gcgtgcctgt tgaagaatga gccggcgact cataggcagt ggcttggtta agggaaccca
    66661 ccggagccgt agcgaaagcg agtcttcata gggcaattgt cactgcttat ggacccgaac
    66721 ctgggtgatc tatccatgac caggatgaag cttgggtgaa actaagtgga ggtccgaacc
    66781 gactgatgtt gaagaatcag cggatgagtt gtggttaggg gtgaaatgcc actcgaaccc
    66841 agagctagct ggttctcccc gaaatgcgtt gaggcgcagc ggttgactgg acatctaggg
    66901 gtaaagcact gtttcggtgc gggccgcgag agcggtacca aatcgaggca aactctgaat
    66961 actagatatg acctcaaaat aacaggggtc aaggtcggcc agtgagacga tgggggataa
    67021 gcttcatcgt cgagagggaa acagcccgga tcaccagcta aggcccctaa atgaccgctc
    67081 agtgataaag gaggtagggg tgcagagaca gccaggaggt ttgcctagaa gcagccaccc
    67141 ttgaaagagt gcgtaatagc tcactgatcg agcgctcttg cgccgaagat gaacggggct
    67201 aagcgatctg ccgaagctgt gggatgtaaa aatgcatcgg taggggagcg ttccgcctta
    67261 gagggaagca cccgcgcgag caggggtgga cgaagcggaa gcgagaatgt cggcttgagt
    67321 aacgcaaaca ttggtgagaa tccaatgccc cgaaaaccta agggttcctc cgcaaggttc
    67381 gtccacggag ggtgagtcag ggcctaagat caggccgaaa ggcgtagtcg atggacaaca
    67441 ggtgaatatt cctgtactac cccttgttgg tcccgaggga cggaggaggc taggttagcc
    67501 gaaagatggt tatcggttca aggacgcacg gtgtccctgc tttttcaggg taagaagggg
    67561 tagagaaaat gcctcgagcc aatgttcgag taccaggcgc tacggcgttg aagtaaccca
    67621 tgccatactc ccaggaaaag ctcgaacgac cttcaacaaa agggtacctg tacccgaaac
    67681 cgacacaggt gggtaggtag agaataccta ggggcgcgag acaactctct ctaaggaact
    67741 cggcaaaata gccccgtaac ttcgggagaa ggggtgcctc ctcacaaagg gggtcgcagt
    67801 gaccaggccc gggcgactgt ttaccaaaaa cacaggtctc cgcaaagtcg taagaccatg
    67861 tatgggggct gacgcctgcc cagtgccgga aggtcaagga agttggtgac ctgatgacag
    67921 gggagccggc gaccgaagcc ccggtgaacg gcggccgtaa ctataacggt cctaaggtag
    67981 cgaaattcct tgtcgggtaa gttccgaccc gcacgaaagg cgtaacgatc tgggcactgt
    68041 ctcggagaga ggctcggtga aatagacatg tctgtgaaga tgcggactac ctgcacctgg
    68101 acagaaagac cctatgaagc ttcactgttc cctgggattg gctttgggcc tttcctgcgc
    68161 agcttaggtg gaaggcgaag aaggccccct tccggggggg tccgagccat cagtgagata
    68221 ccactctgga agagctagaa ttctaacctt gtgtcaggac ctacgggcca agggacagtc
    68281 tcaggtagac agtttctatg gggcgtaggc ctcccaaaag gtaacggagg cgtgcaaagg
    68341 tttcctcggg ccggacggag attggccctc gagtgcaaag gcagaaggga gcttgactgc
    68401 aagacccacc cgtcgagcag ggacgaaagt cggccttagt gatccgacgg tgccgagtgg
    68461 aagggccgtc gctcaacgga taaaagttac tctagggata acaggctgat cttccccaag
    68521 agctcacatc gacgggaagg tttggcacct cgatgtcggc tcttcgccac ctggggctgt
    68581 agtatgttcc aagggttggg ctgttcgccc attaaagcgg tacgtgagct gggttcagaa
    68641 cgtcgtgaga cagttcggtc catatccggt gtgggcgtta gagcattgag aggacctttc
    68701 cctagtacga gaggaccggg aaggacgcac ctctggtgta ccagttatcg tgcccacggt
    68761 aaacgctggg tagccaagtg cggagcggat aactgctgaa agcatctaag tagtaagccc
    68821 accccaagat gagtgctctc ctattccgac ttccccagag cctccggtag cacagccgag
    68881 acagcgacgg gttctctgcc cctgcgagga tggagcgaca gaagttttga gaattcaaga
    68941 gaaggtcacg gcgagacgag ccgtttatca ttacgatagg tgtcaagtgg aagtgcagtg
    69001 atgtatgcag ctgaggcatc ctaacagacc ggtagacttg aaccttgttc ctacatgacc
    69061 cgatcaattc gatcaggtac tcgccatcta tttttattgt tcaactcttt gacaacatga
    69121 aaaaaccaaa agctctgccc tccctctcta tcgatccaag ggatggaagg gcggaggcct
    69181 ttggtgtccc ctccagtcaa gaattggggc ctcacaatca ctatccaata tgtttttctc
    69241 tcatgccttt cttcgttcat agttcgatat tctggtgtcc taggcgtaga ggaaccacac
    69301 caatccatcc cgaacttggt ggttaaactc tactgcggtg aagatactgt aggggaggtc
    69361 ctgcggaaaa atagctcgac gccaggatga taaaaagctt aacacccctc attcttatta
    69421 ctttttcaat atgaaaaaaa atgaaaaggt cgtcttatct tattcaaaac cccaattatg
    69481 aaatctcttc tctcccactt cacacctcgg aacgcaccgt tcttatagag agagaggcgc
    69541 tttcgcatct tcttaacccg aaagggctgg ggagaggaaa ggttcctttt ttagggtact
    69601 cccaggaaca gatccagtgg agacagggtg gggcctgtag ctcagaggat tagagcacgt
    69661 ggctacgaac cacggtgtcg ggggttcgaa tccctcctcg cccacaaccg gccaaaaagg
    69721 gaaggacccc tccctctgga ggtaggaaaa tcatgatcgg gatagcggat ccaaggctat
    69781 ggaacttggg tgtaggtctt gtgtcaaaat agaatggcct cactttttct tctttttatt
    69841 tcttatttct tcttgatata tatatcgtta atgccggaat ccgtcggacc aaatcagcat
    69901 atttttttgt tttacgcccc gtaactcttc ctcagccagg cttgggcaga atagcagagc
    69961 aagtattggt agcatagcaa aaatgtgttc gtcgtcatta atatgtttgc tcgcggtaat
    70021 tgtggcctct cggcagaatc gatgactgca tctttgatgc acttgctagt acatctgaaa
    70081 attcttaatt ggctagttgt aaatagcccc agactatgga acaaaggatt ataccggact
    70141 tatctacacc gaggtattga cggtgattct caaatatcgc agaacagaat gtgatatgat
    70201 gagatagaat gcaatagaaa gaaagccaca gggaacgggt tacctactct taacggtcaa
    70261 agcaaaccct ttcattccga attctttaat tcggaatgaa tcaaatctcc ccaagtagga
    70321 ttcgaaccta cgaccagtca gttaacagcc gaccgctcta ccactgagct actgaggaac
    70381 aacgggagat tagatctcgt agagttcaat tcccgttctt aacccatgac caatatgagc
    70441 tcgaagtttc cttcgtaact cccgaaactt cttcgtagtg tctttgttcc atgcctcatt
    70501 tcatagggaa cctcaaagtg gctctatttc attatattcc atccatatcc caattccatt
    70561 catttaatat cccctttggt gtcattgaca taagagatgt cgtttctagt ctatctgttt
    70621 ctatttctat atgctatttc tatatatatg gaaagtttca aaatcatcat ataataatcc
    70681 agaaattgca atagaaaaga aaaagggggt ttgtgatatg attttgaaat cttttatact
    70741 aggtaatcta gtatccttat gcatgaagat aatcaattcg gtcgttatgg tcggactcta
    70801 ttatggattt ctgaccacat tctccatggg gccctcttat ctcttccttc tccgagctcg
    70861 ggttagagaa gaaggagaag aaggaaccga gaagaaggta tcagcaacaa caggttttat
    70921 tacgggacag ctcatgatgt tcatatcgat ctattatgcg cctctgcatc tagcattggg
    70981 tagacctcat acaataactg tcctagctct accgtatctt ttgtttcatt tcttctggaa
    71041 caatcacaaa cacttttttg attatggatc tactaccaga aattcaatgc gtaatcttag
    71101 cattcaatgt gtattcctga ataatctcat ttttcaatta ttcaaccatt tcattttacc
    71161 aagttcaatg ttagtcagat tagtcaatat ttatatgttt cgatgcaaca acaagatgtt
    71221 atttgtaaca agtagttttg ttggttggtt aattggtcac attttattca tgaaatgggt
    71281 tggattgata ttagtctgga tacagcaaaa tcattctatt aaatcgaatg tatttattcg
    71341 atctaataag taccttgtat cagaattgat aaattctatg gctcgaatct ttagtattct
    71401 cttatttatt acctgtgtct actctttagg cagaatgccg tcacccattt tgactaagaa
    71461 actgaaagaa acctcagaaa gggaagaaag ggaggaagaa acagatgtag aaatagaaaa
    71521 aacttccgaa acaaaagaga tagactataa aaatagacaa atttttgaaa ttttatattc
    71581 ttatgattta gatggtaatc aaaaaagtag taaattacta aaaaaaaaag atctcttctg
    71641 gtttgaaaaa cctcttgtaa ctagtctttt cgactacaaa cgatggaatc gtccgtttcg
    71701 atatataaaa aatgatcaat ttgaaaatgt tgtacggcag gaaatgtcac aatatttttt
    71761 ttatacatgt caaagtgatg gaaaagaaag aatatctttt acatatccaa aaagtttgtc
    71821 aactttttta gaaatgatac aaagaaaaat gtctctgttt acaacaaaga aactctccct
    71881 tgatgaattg tataatcatt ggaattctaa caatgaaaaa aaaaggaaaa acttaaataa
    71941 agagtttata aatagagtcg aaaccctaga tccgagactt cttgttccga atacactaga
    72001 aaaaaggact agattgtgta atgatgaaac taaaaaaaaa tacttaccta aaacttatga
    72061 tcccttattg agtggatccc gtcgaggaag aatgaaattt ggtttttcat catcaatcat
    72121 aaatgaaact tcgataaaaa attacataga aagggtttgg ataaataaaa tttatcttat
    72181 ccttcttatt accaattatc tagaatttga atcaaaaaag gatccatttc attttaatat
    72241 aaaattattt tcaacagaaa tcggttattt cttgaactta attaatgaat ttgctggtaa
    72301 atcagcatca agtttaaatt ttaaaatact ttctttattt ccagattaca aagaagaaaa
    72361 aatgtattca gaagatcgaa taaaaatttt aaaattttta ttggaggcag ttataaccta
    72421 tcccaacaac aaaacaatta gaaaaaaatt tactgaaata aaagaaataa gcaaacaagt
    72481 ttctcggtgc tcatataaat tactcgacga gttggaacaa caagagggag aaaatgagga
    72541 aaacgtgata gaggatcatg aaattcgttc acgaaaagcc aagcgtgtag taatttttac
    72601 tgacaatcaa caaaacaatg atccttataa tactagcaag gataaaataa attctgatca
    72661 aatagacgaa gtgtctttga tacgttattc acaacaatcc gactttcgtc gcgatataat
    72721 aaaaggatct atccgagcac aaagacgcaa aatcgctatt ttggaactgt ttcaagcaaa
    72781 tgtgcattca cccctttttt tggacagaat agataaatct attttttttt cttttgatat
    72841 ttcagagctg atgaaaataa tatttctaaa ttggatatgt aaaaacacag aattgacaat
    72901 tttgaattat acagaaaaaa aaaaaaaaga aagtgagaaa aaagacgaga acaaacgaga
    72961 agaagacaaa agagaggaga aagtccggat agaaattgcc gaagcctggg atagtattat
    73021 atgtgctcaa ataataaggg gttcgctttt agtaacccaa tcaattctta gaaaatatat
    73081 aatcttgccc tcattaataa tagctaaaaa tataattcgt atgctatttt ttcaatttcc
    73141 cgaatggtcc gaagatttaa aggattggaa tagagaaatg catgttaaat gcacctataa
    73201 tggagttcaa ttatcagaaa cagaatttcc gcaaaactgg ttaacagacg gtattcaaat
    73261 aaagatctta tttccttttc gtctaaaacc ttggcacaga tctaagttaa aaatttctca
    73321 tactcataaa gatccaatga aaaagaaagg gcaaaaaaat gagttttgtt ttttaacagt
    73381 ttttggaatg gaagttgaac tcccttttgg ctccccccga aaacgacttt cactttttaa
    73441 ccccatattt acaaaactaa aaaaaaaaat tagaaagttg aaaaaaaatt gttttctagt
    73501 tataaaaatt ttaaaagaaa gattctttct aaatttttca aaagaaataa aaaaccgggt
    73561 catcaaaagc attctatttc taaaagaaat aataaacaaa ctttcaaaat taaaaagaaa
    73621 cccaattcta ttatttggat ttagagaagt atatggattg aatgaaacta aaaaagatct
    73681 gataatcaat aatcgaatga cttttcaatt ttctactcaa cttcaatcta tggaatctat
    73741 ggactggaca aatttttcac tgacagaaaa aaaaatgaaa gatctcactg atagaataaa
    73801 cacaatacta aatcaaatcg aaaacattac aaaagaaaag acaaaaagat ttataacctc
    73861 agagatcaat attaatccta acaaaataaa tgatcctgct aacagattca aattaaaatc
    73921 atcaaaaaat atttcaaata tattgaaaag aaaaaaaagt caattagtcc acaaatcaca
    73981 tttttttata agaattttga ttgaaagaat atacatagat atctttcttg gtatcattaa
    74041 tattccaagg attaatgctc catttttttt tgaatcaaca agaaaaatta ttaataaata
    74101 catttactat gatgaagaaa atcataaaaa aatggataaa agaaatgaaa atgcaattca
    74161 ctttatttca actataaaaa agtcacttat taatgatagt agcgttctta ctaagaattc
    74221 acagcttttt tgtgatgtat cctccttgtc acaaacatat gtactttaca aattatcaca
    74281 aatccaagtt attaacatat ataagttaag atctgtcctt caatataaag gaacacccct
    74341 ctttcttaag aaagaaataa aagattattt tgccatccag ggactatttc attctaagtt
    74401 aaaagataaa aattttcgaa attctgtaat caatcaatgg aaaaactggt taaagagtca
    74461 ttaccaatat aaatatgatt tatctccgat tagatggtct agattaatat cacaaaaaag
    74521 gcgaaacaag atcaatcaag accgtatggt tcaaaataaa gataaaaatt taaacaaatt
    74581 gaatttatat gaaaaaaacc aattaattca ttacgaaaag caaaatgatc ttgaaggcga
    74641 ctcattatcg aaccaaaaag agaattttaa aaaacactat cgatattatc ttttatcata
    74701 taaatttatt aattatgaag agaaaaaaga ttcatctata tatagattcc aagtaaagaa
    74761 taaacaagag atttccaaca cagaaaaaag caaattactt gatatattgg aagatatccc
    74821 tatcaataat tttctaacag aaaaacctat tgtcgatatg aataaaagtc caactagaaa
    74881 atattttgat tggaaaattc tctatttttg tcctagaaat aaggtcaata ttgactgctg
    74941 gatcaatacc ggaacgaaac aaaaaaaaaa taagaataaa actagcccta ataagtatca
    75001 aataattgat aaaattgata aaaaaggtct tttttttttt acgattccaa aatatgaaaa
    75061 aaaagtactt tcatccaatc aaaaggcttt tttttttgat tggatgggaa tgaatgaaga
    75121 aatactcaat caccccatat tcaattttga actttggttt tttcaaaaat ttgtaatact
    75181 ttccaacacc tacaagataa aaccatggtc gataccaatc aaattacttc tcttaaattc
    75241 aaatggaaat gaacctgctc ataaaaataa aaaaatcaac gaaaagagaa agaaaagtgg
    75301 agatcctctt atatctatat catcgaccga aaaaaaatct attgaattag cgaatggaaa
    75361 tcaagaagaa aaagaatctg aggatcaagt gtatctggta tcagttttcg caaatcaaga
    75421 aaaagatatt gaagaagctt atgcgggatc aggcatgaaa aaacgtagaa agaaaaagca
    75481 atacaaaaat aatacggaag cagaactcga tttcttccta aaaaggtatt tacgttttca
    75541 attaagatgg gatgattctt taaatcaaaa aataatcaat aatatcaaag tatattgtct
    75601 cctgcttaga ctacccaatc cacgagaaat tattttatcc tatatccaaa ggggagaaat
    75661 gagtctggat attctaatga ctcagaagaa tgtaactctc acagaattga tgaaaaaggg
    75721 aatcctgatt attgaaccag ttcgtttgtc agtaaaaaat gatggacaat tttttatata
    75781 tcaaatcata ggtattttat tggttcataa tagcaaacaa caaattaatc aaagatacag
    75841 agaaaaaagt tatgttgata aaaagaattt taccgcaccg attgaaagaa atcaaaatat
    75901 aactggaaat agagataaaa atcattatga tttacttgtt cttgaaaatg ttttctcccc
    75961 taaacatcgt agagaattga gaattttaat gttgttcaat tcaaaaaata gaaatgatat
    76021 tcatataaat acaaaaattt tcaatgctaa taacataaaa gactatggtc ccattctgga
    76081 taaaagcaaa cattttgata aaactaaaaa caaactaatt aaattaaagc tttttctttg
    76141 gcccaattat cgattagaag atttagcttg tataaatcgc tattggtttg ataccaataa
    76201 tgccagtcgt ttcagtatgc taaagataca tatatatcca ccattgaaaa tttagtaaga
    76261 gtacatcttt catatatctc atagcatgtc tgatctagta taaaaaaatg aacacatgtg
    76321 ttggtttcca ttccatattc cattcggata catagaattc aaccacatat caattgtatc
    76381 tagagatgaa aaatggaagt tttttttcct tttaggtata attttttttt ttcttttgta
    76441 agcgaagaaa tatatcatct ttttttattc ggttagaaat aaaaaaaatt ggattgctta
    76501 atgatcgatt ttatttaaca aaattaggaa ttcttaccga aggaaagatt ctttattgtg
    76561 tataacataa aataaactga cattattatt tattacatta tttattatta ctgatcaata
    76621 aaaaaatatc ttaaaataag ataagaaaag ggagcttttt ttatggtaaa aaattcattc
    76681 atttcaatta tttcacaaaa acaaaaagaa ggaaacacgg gatctgttga atttcaaata
    76741 aaaagtttca ctaataagat acgaagactt acttcacatt tggaattaca tagaaaagac
    76801 tatttatctc agagaggttt acggaaaatt ctaggaaaac gtcaacgact cctatcttat
    76861 ttggccaagc aaaatagaat gcgttataaa gaattaatta accaattgga tattcgggag
    76921 tcaaaaactc gttgatttga agagttcttt tttgaattat ttgatttatg agatcttgaa
    76981 ttttgatgaa tttattttcg ttttcagtaa ttcatagaag aacgaatcga ggaaatccct
    77041 atgaatgtac cagttccaag agaagacctt atgatagtca atatgggccc tcaccaccca
    77101 tcaatgcatg gtgttcttcg actgatcgtt actctagacg gtgaagatgt tattgactgt
    77161 gaaccaattt taggttattt acacagagga atggaaaaaa ttgcggaaaa ccgaacaatt
    77221 atacaatatt tgccttatgt aacacgttgg gattatttag ctacgatgtt cacagaagca
    77281 ataacagtaa atgggccaga acagttggga aatattcaag tacctaaaag ggccagctat
    77341 atccgaataa ttatgttgga gttaagtcgt atagcctctc atctcttatg gcttggccct
    77401 tttatggcag atattggcgc acagactcct ttcttctata tttttagaga aagagaatta
    77461 atatatgatt tattcgaagc tgcaactggt atgagaatga tgcataattt ttttcgtatc
    77521 ggcggagtgg cggctgatct acctcatgga tggatagata aatgtttgga tttctgtgat
    77581 tattttttaa taggagttac tgaatatcaa aaacttatta cgcgaaatcc tattttttta
    77641 gaacgagttg aaggagtagg tattgttggt acggaggaag caataaattg ggggttatca
    77701 ggaccgatgc tacgagcttc cggaatacaa tgggatcttc gtaaagttga tcattatgag
    77761 tcttatgacg aatttgattg ggaagttcag tggcaaaaag aaggagattc attagctcgt
    77821 tatttagttc gaattggtga aatgacggaa tccataaaaa ttcttcaaca agctctggaa
    77881 ggaatcccag gaggacccta tgagaattta gaaacccgat gttttgatag agaaagggat
    77941 ccagagtgga atgattttga atatcgattc attagtaaaa aaacttctcc tacttttgaa
    78001 ttaccgaagc aagaacttta tgtaagagtc gaagccccaa agggggaatt ggggattttt
    78061 ctgatagggg atcagagtgg gtttccttgg agatggaaaa ttcgcccgcc gggtttcatc
    78121 aatttgcaaa ttcttcctca attagttaaa agaatgaaat tggctgatat tatgacaata
    78181 ctaggtagca tagatatcat tatgggagaa gttgatcgtt gaaatgataa ttgatacaac
    78241 aaaagtacaa gctatacatt cttttttcag attggaatcc ttaaacgcgg tttatggaat
    78301 tatatggatg cttgttccta ttttgactct tgtatttgga atcacactag gcatactcgt
    78361 aattgtgtgg ttagaaagag aaatatccgc aggactacaa caacgtattg gacctgaata
    78421 cgctggccct ttgggggttc ttcaagctct agtggatggg acaaaactac ttttcaaaga
    78481 gaatcttttt ccatctagag ggaataatca tttatttagt atcggaccgt ccatagcagt
    78541 catatcaact ctattaacct attcagtaat tccttttagt tatcaccttg ttttagctaa
    78601 tctaaatatc ggtgtttttt tatggattgc tatttcaagt attgctccga ttggacttct
    78661 tatgtcagga tatggatcaa ataataaata ttccttttta ggtggtctac gagctgctgc
    78721 tcaatcaatt agttatgaaa taccattaac tctctgtgta ttatccatat ctctacgtgt
    78781 gattcgttga aagaaaaact tttccatatt atttttcctt tcttttttta gttttttagg
    78841 aagaaggtga aatgaattga atagatattt tcatttttta tttatcattt tctttgatga
    78901 actcaattag atagttatat gagtgaaaga aaactgctgc taaatttgta gtacaaaatt
    78961 gagactcatt tcctatgtgc aagaggaaac cggaaataga cataagaaga cgagattatt
    79021 tgccccaaga ttggttgatt agtcatcctg gcttgaagcg ggctcaaaag acaaacctta
    79081 ttcagttttc actattattt ctatgtatta ccataatgct aacgggtgat tgagcaaaaa
    79141 ggagtggatg gttaggaaca ccaagataca caaaggatta gtaatagaga ttattaaaat
    79201 agtccaaaag aatatttctg cataatatac atatacataa gataataata taaattaata
    79261 ttctttaata tttaatataa taatataact atatataaga atataaaaag aatattaatg
    79321 ggggctttaa gttggtagaa ctgattaggt aggactcccc atgattccga tttagagtat
    79381 gctgccgccc accgattaaa gaaataacta tcaggaacga aagaatcctt tcctttttaa
    79441 gttcactttt cttttttcat aaattcataa agaagaatag gaaaaaaaat gaatctaatt
    79501 acaatagaaa agaaaaagag atctttttta ttctttcttg tttatagcca tattcataca
    79561 gatcgaattc ttgttataat tcgggaacta atggactgcc taattctttt ttgaatcgac
    79621 aacaatagat tgaactacct atgttctaca agcagtattt ttcattttta cattataacg
    79681 agtattttat taaaggatta aaaaaaagtt attactcaag aaagaaaaac ataaattctt
    79741 aaaggataag atcaattcag aagtactttt ttagtattat aacagaaaga attttattgg
    79801 tcgaattttg ggttttggaa agttcaatag attttgatcc tatctatcct acaaataaga
    79861 aatagatcaa gaaagaacaa atagatcaag ataaataata tgatcctgcc cttagattta
    79921 tttaagtcct tcgaggagcc gtatgaggtg aaaatctcat gtacggttct gtaatagcga
    79981 tggaaacagt gatgttatca ccgactatga ttatctaaca gttcaagtac agttgatata
    80041 gttgaagcac aatcaaaata tggtttttgg gggtggaatt tgtggcgtca acctataggg
    80101 gttatccttt ttttcatttc ttccctagca gaatgtgaaa gactaccttt tgatttacca
    80161 gaagcagaag aagaattagt agcagggtat caaaccgaat actcgggtat caaatttggt
    80221 ttattttatg ttgcttccta tctaaactta ttagtttctt cattatttgt aacagttctt
    80281 tacttgggcg gttggaatat ctctattccg catatatttg ttcctgaact ttttgaaata
    80341 aataaagtgg gtgaggtctt tggaacaatg attggtatct ttattacatt ggttaaaaca
    80401 tatttgttct tgttcattcc tatcacaaca agatggactt tacctagatt aagaatggac
    80461 caattattaa atcttggatg gaaatttctt ttacctattt ctctcggtaa tctattatta
    80521 acaacctcct ctgaactcct ttcactataa gtactctaaa gaaatccttt tctatattca
    80581 caacttgtct gaaacaagag aaagaaacaa agaaaaacct atttataaat attcacgata
    80641 tgctccccat ggtaactggg ttcatgaatt atagtcaaca aaccatccga gctgcaaggt
    80701 acattggtca aagtttcatg attaccttat ctcatgcaaa tcgtttacct ataactattc
    80761 aatatcctta tgaaaaatta attacatcgg aacgtttccg gggccgaatt cattttgaat
    80821 tcgataaatg cattgcttgt gaagtatgtg ttcgtgtatg tcctatagac ctacccgttg
    80881 ttgattggaa attggaaact gacattcgaa agaaaagatt gtttaattac agtattgatt
    80941 ttggaatctg tatattttgt ggcaactgtg ttgagtattg tccaacaaat tgtttatcaa
    81001 tgactgaaga atatgagctt tctacttatg atcgtcacga attaaattat aatcaaattg
    81061 ctttaggccg tttacctatg ttagtaattg acgattatac aattcgaaca gttttaaatt
    81121 cgcctcaaaa aaagggaaat ccattttgat taaagattga ttaaaaagca atttccaatt
    81181 attaaatgtg gaatagtatt tttttttcat tttacttgag caataactat aaaaactaca
    81241 agtgcttagt tggtgagaat cacgtcggga ctaaatttgt attgaagatc tattaatatt
    81301 cgaaatttca atttcgagtg tcgaattatc cttttcgaga aagactgaaa ttaggccaat
    81361 agttgtacct acagtaaatt acaccccttg gggtttaatt caattaagaa ccaattataa
    81421 aatagttttt cctggtcggg tcaagaaggt catgaaaaaa aattcgattt ttttatctct
    81481 tattttacgt acaatggatt tgcttgggtc aatacatgat tttcttttag tctttctggg
    81541 ttttggtctt atattaggag gtctaggagt ggtattagtt accaatccaa tttattctgc
    81601 cttttcgttg gggttggttc ttgtttgtat atctttattc tatattttat caaactctcc
    81661 ttttgtagct gccgcacaac tccttattta tgtgggagct ataaatgttt taattctatt
    81721 tgctgtgatg tttatgaatg gtccagaata ttcaaaagat ttgaatcttt ggaatgttgg
    81781 gggtgggatt accctttttg tttgtacaag tatttttgtt tcactaatta gtattgttct
    81841 agatacgtca tggtacggga ttatttggac tacaagacca aatcagatta tagagcaaga
    81901 gttgataagt aatggtcaac aaattggaat tcatttatca acagattttt tcctttcatt
    81961 tgaatttatt tcaataattc ttttagttgc tttgataggt gcaatcgttg tggctcgtca
    82021 gtaagaaatc tttagaatta gaaattggaa tcaaaataaa acttttgtct atgttattac
    82081 attcattttc ctttaattct atttgaagat tattcatgta taaatttttt tattcaatct
    82141 attaccaata gatttttttg ttatgtactt gtgatattct tattctaata aatccaatcc
    82201 gctgatgttg aattgttgtt cgtgttgaaa taaatcgaaa ttaataagga gttgctcaat
    82261 gatcctcgaa catgtacttg ttttgagtgc ctatttattt tctatcggta tctatggatt
    82321 gatcacgagt cgaaatatgg ttagagccct tatgtgtctt gaacttatac tgaatgcagt
    82381 taatataaat tttgtaacat tttctgattt ttttgatagt cgccaattaa aaggaaatat
    82441 tttctcaatt tttgttatag ctatcgcagc tgctgaagca gctattggac tggctattgt
    82501 ttcgtcaatt tatcgtaaca gaaaatcaac ccgtatcaat caatcgaatt tgttgaataa
    82561 gtagtattca tcagataaaa tagaatattc atcaattcaa atcagcagct atgatatgta
    82621 acgtatctaa tcattttacg aaagaaaacg taaaaaatta aagtatcttg gttctatctc
    82681 atgagtcgat ccacaattga atagatattt tttggtaaat cattgagtca tctagtactt
    82741 taaatatata attcaaattc cttaaaaaaa tttctagatc gagaattcaa atttatgata
    82801 ttcaaaaaaa ttctagatac aatgtcacat tcagtaaaga tttatgatac atgtataggg
    82861 tgtactcaat gtgtacgagc ctgccccacc gatgtattag aaatgatacc ttgggacgga
    82921 tgtaaagcaa agcaaattgc ttctgcccca agaacagaag actgtgtcgg ttgtaagaga
    82981 tgtgaatccg cctgtccaac ggatttcttg agtgttcgag tttatttatg gcatgaaacc
    83041 acccgaagta tgggtctagc ttattgataa tttccataaa aaaaccactt gaatacattt
    83101 gattttttgt ttaccgacaa aaacccgtaa tcgaaaacat aatatatttg ttataatttc
    83161 gaatacgggt ttttctggtc caagtgtatc ttgcctttac cacgaattct tttccttggt
    83221 taacattatt tgtagtttta ccgatatccg caggttcttt aatttttttt ttcctcatcg
    83281 aggaaataag gtaatgaaat ggtatactat atttatatgt ttatctgaac ttcttttaat
    83341 gacctatgca ttctcttatt atttcgaatt ggatgatcca ttaattcaat taacagagga
    83401 ttataaatgg atcaatttct ttgattttta ctggagattg ggaatagatg gactttcttt
    83461 agggccgact ttactgacag gatttattac tactttagct actttagcgg ctcggccagt
    83521 tactcgggat tcccgattat tccattttct gatgttagca atgtatagtg gtcaaatagg
    83581 attattttct tctcaagatc ttttgctttt tttcatcatg tgggagttag aattaattcc
    83641 tgtttatcta cttctatcga tatggggagg gaagaaacgt ctatattcag ctacaaagtt
    83701 tattttgtat actgcaggaa gttctgtctt tttattaatg ggagctttgg gtattgcttt
    83761 atatggttcc aatgaaccaa catttaattt tgaaacatca gcaaatcaat catatcctgt
    83821 gtctttggaa ataatattct atattggatt tcttattgct tttgctgtca aatcaccgat
    83881 tatacccttc catacatggt tacccgacac ccatggggaa gcacattata gtacttgtat
    83941 gcttctagcc ggaatcctat taaaaatggg agcgtatggg ttagttcgaa tcaatatgca
    84001 attattacct catgctcatt ctatattttc tccctggttg ataatagtag gcgcaataca
    84061 aataatctat gcagcttcaa catctcctgg tcaacgaaat ttaaaaaaaa gaatagccta
    84121 ttcttctgta tctcatatgg gtttcataat tataggaatt tgttctataa gcgatatggg
    84181 acttaatgga gccattttac aaataatatc acatggattt attggcgctg cccttttttt
    84241 cttggcagga acgagttatg atagaatacg tctcgtttat cttgacgaaa tgggcggaat
    84301 ggctaaccca atgccaaaaa tattcatgat gttcagtatc ttatcactag cctcccttgc
    84361 attaccaagc atgagcggtt ttttttcgga attgatagta tttcttggaa taattactgg
    84421 tcaaaaatat tttttaatgc caaaaatact aattactttt ggaatggcag ttggaatgat
    84481 attaactcct atttatttat tatctatgtt acgccaaata ttctatggat acaagctttt
    84541 taatggcaca tatttttctt tttttgattc tggtccacga gagctctttg ttttaatctc
    84601 tatccttttg ccaataatag gtattggtat ttatccggat ttcgtttttt cattgtcagt
    84661 cgacaaggtt gaagatattt tatctaatta tttttatagg tagtttttat aactaataac
    84721 tatttataac taataactaa aaaataataa ctaaaaaaaa gaaaacaaaa agcaatccta
    84781 ttatttttat tttaaaaaat aaaaaaatag aaaattatta tgaaactttt tatataataa
    84841 aaaaacttct tttttctgcc cttaaattta agttaaaaaa aaaatgcatt gtaacgggat
    84901 ccagatatgt ttggcatttg tgagaacttt ttgaatcact acaggaggtg attcaaaaag
    84961 ttctcaatgg cttacctgaa atttcttcta tatgccgtcc tagggttata ttcgccagac
    85021 cctttacttg aattcaatta gatgttaatg taaatgaacc ataactatgt agtcctactc
    85081 ctaataaatt aaccccaaaa taacatatcc aaattataag aaagccgata gaggcgacaa
    85141 ttgcggaatg aaaaccttcc caatttttct ttgttcgaat atgtaaataa atcgcgaata
    85201 tagtccaagt aataaatgcc caagtttctt ttggatccca attccaatac gatccccatg
    85261 cttcattagc ccagactgcg cccgaaagaa tacctatggt taaaaaaaga aaccctatac
    85321 taataatacg atcactccaa taatctaatt gttgaatcaa ttgaaatttg taataattcc
    85381 tagaaaaaag aaaagaagta ctttttaaaa cactccctct ttccatcatg tattggatct
    85441 taccgaagga aaatgaatca tttactaaat tattcctttt atcaaaaaat cttatgaatt
    85501 ttcgaaatgt aattactaga agtgctactg ataataacga tccacataaa agagctacat
    85561 agcccaatac catcatactt acgtgcatca ttaaccactg agattgaaga gctggtacta
    85621 aattttcgga ttgatgtgtg tcagttaaaa gacccgaagt agcaaagcct tgggcaaaaa
    85681 aagtacttgg ggtgattatt gcacttaaat aatttatatg ttttttaaaa ttaaaatacg
    85741 gaatcatatg aataatggag aaaccccagg aaagaaagat taatgattca tataaatcac
    85801 ttaatggtaa atgtcccgaa taaatccaac gaatgactaa taatcctgtt atacagaaaa
    85861 aagtggttat catgcctttt tctgacgaat catatagtcc tacgaattca tcgactaata
    85921 aggttatcaa atgaattgta attacaattg aaacgaccga aaaagatata tgagctaata
    85981 tatgttctaa agtcgaaaat atcataaaaa ttcttaaaaa gacgggactc aattatatta
    86041 tacgaaatta aaagcaggaa ttgaattcat tataggactt attctaactt tttgatttga
    86101 aattgaaaaa tttatgccgc cactcggact cgaaccgaga tgctctagca ctgcttccta
    86161 agagcagcgt gtctaccgat ttcaccatag cggcttgctc aaaatcataa taaactattt
    86221 ttattcaatc gtcgagcttg aaggagtcaa ttcaatgtaa tatttttata ttttaggacg
    86281 gataaaaatt caagattaat gaataaaaat ttgtaatttt gaatctttcc atattaatac
    86341 ttattattat aatctattaa tacttattat tataatcctt attatcattt agtatgctaa
    86401 tttcagttac cccaaccatg gttttttgta ttgtagtttt ttatggatta caatttcaac
    86461 actacattca aggggtttat ggaaacattt aattctatta atcgtttaat ccgtaaggtt
    86521 tcattattat tgtttgtgtt agaatttaac aacccagtta ggcataggta ttgatttggg
    86581 tatatcatat aaaaaaggga acgggttctg tcccgtactt caaaaaatct tgtctatctt
    86641 gatccatctt ccagcccaag catatgatct aaaatacatc attcaaaatt tacatatttt
    86701 tatctacctc aatttaaaag aaaatctacc tcaatttaaa agaaattttg attttattaa
    86761 gtattttttt tttcactagt attttagttt tatcatttga ccaattctaa cttcttgatt
    86821 tgaatatgtg aattatttgg taaagattca gaataattaa gaatagcaaa tttgatttta
    86881 gttttgtata tctttatctt ttttttcttt attttattaa cattttattg actgaaccct
    86941 ttttttaaca agaaataaga accgatgaat gagaaacagg aaaaaatgaa ttcaattatt
    87001 aattaaacta atacaatttt tttatggaac atatacatca atattcatgg atcataccgt
    87061 tccttacact ttcagtccct atgttaatag gatggggact cctacttttt ccggcagcaa
    87121 caaaaaaatt tcgtcgtatg tggtcctttc cgagtgtttt attgttaagt ataattatga
    87181 ttttttcgac caatctgtct attcagcaaa taaatagttc ttttatctat caatatgtat
    87241 ggtcttggac catcaataat gatttttcct tagagttcgg acacttgatc gaccccctta
    87301 cttctatttt gtcaatatta attactacag ttggagttct ggttcttatt tatagtgata
    87361 attatatgtt tcatgatcaa agctatttga gattttttgc ttatatgagt tttttcaata
    87421 cttcaatgtt gggattagtt actagttcta atttgataca aatttatatt ttttgggaat
    87481 tggttggaat gtgttcttat ctattaatag gcttttggtt cacacgacct attgcgtcga
    87541 atgcttgcca aaaagcattt gtaactaatc gtgtagggga ttttggttta ttattaggaa
    87601 ttttaggtct ttattggata acaggcagtt ttgactttcg ggatttattc gaaatattca
    87661 aaaacttgat ttttaacaat gaagctaatt ttttatttct tactttgtgt gctttcctat
    87721 tattttctgg tgcaattgct aaatcagccc aatttcctct tcatgtatgg ttaccagatg
    87781 ccatggaagg acccactcct atttcggcct taatccatgc tgctactatg gtagcggcgg
    87841 gtatttttct tgtaactcga cttctacctc ttttcgtact cataccctac ataatgaatc
    87901 taatagcttt gataggtata ataacagtat tcttaggagc gactttagca cttgctcaaa
    87961 gagatattaa gaggagttta gcctattcta caatgtctca attgggttat acaatgttag
    88021 ctctaggtat ggggtcgtat cgagctgctt tatttcattt gattactcat gcttattcaa
    88081 aagcattgtt atttttagga gctggatcca ttattcattt aatggaagct attgttggtt
    88141 attccccaga taatagtcaa aatatggttc ttatgggtgg cttaacaaaa catgttccga
    88201 ttacaaaaac tgctttttta ttaggaaccc tctctctttg tggtattcca ccccttgcct
    88261 gtttttggtc caaagatgaa attcttaatg atatttggtt gtattcactt agtttcgcaa
    88321 taatagcttg gttcacagca ggattgactg ccttttatat gtttcgagtc tatttactta
    88381 cttttgaagg gcatttaaat gtttcttttc aaaattacag tggcaaaaaa aatagctcat
    88441 tctatggaat atctctatgg ggtaaagaag catccaaaat ggtaaaaaaa aaaattcgtt
    88501 tatgtttatt aagtgtatta acaatgaatg atgaaagggg tttttttttt cggaagaaga
    88561 catatcaaat tgatggtaat gtaagaaata tgacgcatcc ttttattact attaaatctt
    88621 ttgacaataa aagtactttt tcctatcctc acgaatcgga taatactatg ttattcccta
    88681 tacttgtttt agtactattt actttgttta ttggagctat aggaatttct ttcaatcaat
    88741 tcaatcaaga aggaatggat ttggctatat tatcaaaatt gttaactccc tttttgaatc
    88801 aaaatcaaaa aaattctatg aatgtctatg aatttgtaac aaacgcaatt ttctcagtca
    88861 gtatagctta ttttggaata tttatagcat catatttata taagcccatt tattcatcgt
    88921 tacaaaattt taacttcctt aattcgcttg ctaaagaagg tcctaaggga attctttggg
    88981 acaaaataat aaatgtcata tacgattggt cctataatcg tgcttacata gatgattttt
    89041 atgcaatatt ttttactgga ggtataagaa aattaacgca attaattgag ttttttgata
    89101 gacgactaat tgatggactt actaatggaa tcggagttac aagtttcttt gtaggagaag
    89161 gtataaaata tataggagga ggtcgcatct catcttatct cttgttctat tcattttatg
    89221 tattaatttt tttattatta gtaatttact ttttttttta gtaatttact acttttttga
    89281 ttaccatcta aatcataaga atataaaatt tcaaaaattt gtctattttt atagtctatc
    89341 tcttttgttt cggaagtttt ttctatttct acatctgttt cttcctccct ttcttccctt
    89401 tctgaggttt ctttcagttt cttagtcaaa atgggtgacg gcattctgcc taaagagtag
    89461 acacaggtaa taaataagag aatactaaag attcgagcca tagaatttat caattctgat
    89521 acaaggtact tattagatcg aataaataca ttcgatttaa tagaatgatt ttgctgtatc
    89581 cagactaata tcaatccaac ccatttcatg aataaaatgt gaccaattaa ccaaccaaca
    89641 aaactacttg ttacaaataa catcttgttg ttgcatcgaa acatataaat attgactaat
    89701 ctgactaaca ttgaacttgg taaaatgaaa tggttgaata attgaaaaat gagattattc
    89761 aggaatacac attgaatgct aagattacgc attgaatttc tggtagtaga tccataatca
    89821 aaaaagtgtt tgtgattgtt ccagaagaaa tgaaacaaaa gatacggtag agctaggaca
    89881 gttattgtat gaggtctacc caatgctaga tgcagaggcg cataatagat cgatatgaac
    89941 atcatgagct gtcccgtaat aaaacctgtt gttgctgata ccttcttctc ggttccttct
    90001 tctccttctt ctctaacccg agctcggaga aggaagagat aagagggccc catggagaat
    90061 gtggtcagaa atccataata gagtccgacc ataacgaccg aattgattat cttcatgcat
    90121 aaggatacta gattacctag tataaaagat ttcaaaatca tatcacaaac cccctttttc
    90181 ttttctattg caatttctgg attattatat gatgattttg aaactttcca tatatataga
    90241 aatagcatat agaaatagaa acagatagac tagaaacgac atctcttatg tcaatgacac
    90301 caaaggggat attaaatgaa tggaattggg atatggatgg aatataatga aatagagcca
    90361 ctttgaggtt ccctatgaaa tgaggcatgg aacaaagaca ctacgaagaa gtttcgggag
    90421 ttacgaagga aacttcgagc tcatattggt catgggttaa gaacgggaat tgaactctac
    90481 gagatctaat ctcccgttgt tcctcagtag ctcagtggta gagcggtcgg ctgttaactg
    90541 actggtcgta ggttcgaatc ctacttgggg agatttgatt cattccgaat taaagaattc
    90601 ggaatgaaag ggtttgcttt gaccgttaag agtaggtaac ccgttccctg tggctttctt
    90661 tctattgcat tctatctcat catatcacat tctgttctgc gatatttgag aatcaccgtc
    90721 aatacctcgg tgtagataag tccggtataa tcctttgttc catagtctgg ggctatttac
    90781 aactagccaa ttaagaattt tcagatgtac tagcaagtgc atcaaagatg cagtcatcga
    90841 ttctgccgag aggccacaat taccgcgagc aaacatatta atgacgacga acacattttt
    90901 gctatgctac caatacttgc tctgctattc tgcccaagcc tggctgagga agagttacgg
    90961 ggcgtaaaac aaaaaaatat gctgatttgg tccgacggat tccggcatta acgatatata
    91021 tatcaagaag aaataagaaa taaaaagaag aaaaagtgag gccattctat tttgacacaa
    91081 gacctacacc caagttccat agccttggat ccgctatccc gatcatgatt ttcctacctc
    91141 cagagggagg ggtccttccc tttttggccg gttgtgggcg aggagggatt cgaacccccg
    91201 acaccgtggt tcgtagccac gtgctctaat cctctgagct acaggcccca ccctgtctcc
    91261 actggatctg ttcctgggag taccctaaaa aaggaacctt tcctctcccc agccctttcg
    91321 ggttaagaag atgcgaaagc gcctctctct ctataagaac ggtgcgttcc gaggtgtgaa
    91381 gtgggagaga agagatttca taattggggt tttgaataag ataagacgac cttttcattt
    91441 tttttcatat tgaaaaagta ataagaatga ggggtgttaa gctttttatc atcctggcgt
    91501 cgagctattt ttccgcagga cctcccctac agtatcttca ccgcagtaga gtttaaccac
    91561 caagttcggg atggattggt gtggttcctc tacgcctagg acaccagaat atcgaactat
    91621 gaacgaagaa aggcatgaga gaaaaacata ttggatagtg attgtgaggc cccaattctt
    91681 gactggaggg gacaccaaag gcctccgccc ttccatccct tggatcgata gagagggagg
    91741 gcagagcttt tggttttttc atgttgtcaa agagttgaac aataaaaata gatggcgagt
    91801 acctgatcga attgatcggg tcatgtagga acaaggttca agtctaccgg tctgttagga
    91861 tgcctcagct gcatacatca ctgcacttcc acttgacacc tatcgtaatg ataaacggct
    91921 cgtctcgccg tgaccttctc ttgaattctc aaaacttctg tcgctccatc ctcgcagggg
    91981 cagagaaccc gtcgctgtct cggctgtgct accggaggct ctggggaagt cggaatagga
    92041 gagcactcat cttggggtgg gcttactact tagatgcttt cagcagttat ccgctccgca
    92101 cttggctacc cagcgtttac cgtgggcacg ataactggta caccagaggt gcgtccttcc
    92161 cggtcctctc gtactaggga aaggtcctct caatgctcta acgcccacac cggatatgga
    92221 ccgaactgtc tcacgacgtt ctgaacccag ctcacgtacc gctttaatgg gcgaacagcc
    92281 caacccttgg aacatactac agccccaggt ggcgaagagc cgacatcgag gtgccaaacc
    92341 ttcccgtcga tgtgagctct tggggaagat cagcctgtta tccctagagt aacttttatc
    92401 cgttgagcga cggcccttcc actcggcacc gtcggatcac taaggccgac tttcgtccct
    92461 gctcgacggg tgggtcttgc agtcaagctc ccttctgcct ttgcactcga gggccaatct
    92521 ccgtccggcc cgaggaaacc tttgcacgcc tccgttacct tttgggaggc ctacgcccca
    92581 tagaaactgt ctacctgaga ctgtcccttg gcccgtaggt cctgacacaa ggttagaatt
    92641 ctagctcttc cagagtggta tctcactgat ggctcggacc cccccggaag ggggccttct
    92701 tcgccttcca cctaagctgc gcaggaaagg cccaaagcca atcccaggga acagtgaagc
    92761 ttcatagggt ctttctgtcc aggtgcaggt agtccgcatc ttcacagaca tgtctatttc
    92821 accgagcctc tctccgagac agtgcccaga tcgttacgcc tttcgtgcgg gtcggaactt
    92881 acccgacaag gaatttcgct accttaggac cgttatagtt acggccgccg ttcaccgggg
    92941 cttcggtcgc cggctcccct gtcatcaggt caccaacttc cttgaccttc cggcactggg
    93001 caggcgtcag cccccataca tggtcttacg actttgcgga gacctgtgtt tttggtaaac
    93061 agtcgcccgg gcctggtcac tgcgaccccc tttgtgagga ggcacccctt ctcccgaagt
    93121 tacggggcta ttttgccgag ttccttagag agagttgtct cgcgccccta ggtattctct
    93181 acctacccac ctgtgtcggt ttcgggtaca ggtacccttt tgttgaaggt cgttcgagct
    93241 tttcctggga gtatggcatg ggttacttca acgccgtagc gcctggtact cgaacattgg
    93301 ctcgaggcat tttctctacc ccttcttacc ctgaaaaagc agggacaccg tgcgtccttg
    93361 aaccgataac catctttcgg ctaacctagc ctcctccgtc cctcgggacc aacaaggggt
    93421 agtacaggaa tattcacctg ttgtccatcg actacgcctt tcggcctgat cttaggccct
    93481 gactcaccct ccgtggacga accttgcgga ggaaccctta ggttttcggg gcattggatt
    93541 ctcaccaatg tttgcgttac tcaagccgac attctcgctt ccgcttcgtc cacccctgct
    93601 cgcgcgggtg cttccctcta aggcggaacg ctcccctacc gatgcatttt tacatcccac
    93661 agcttcggca gatcgcttag ccccgttcat cttcggcgca agagcgctcg atcagtgagc
    93721 tattacgcac tctttcaagg gtggctgctt ctaggcaaac ctcctggctg tctctgcacc
    93781 cctacctcct ttatcactga gcggtcattt aggggcctta gctggtgatc cgggctgttt
    93841 ccctctcgac gatgaagctt atcccccatc gtctcactgg ccgaccttga cccctgttat
    93901 tttgaggtca tatctagtat tcagagtttg cctcgatttg gtaccgctct cgcggcccgc
    93961 accgaaacag tgctttaccc ctagatgtcc agtcaaccgc tgcgcctcaa cgcatttcgg
    94021 ggagaaccag ctagctctgg gttcgagtgg catttcaccc ctaaccacaa ctcatccgct
    94081 gattcttcaa catcagtcgg ttcggacctc cacttagttt cacccaagct tcatcctggt
    94141 catggataga tcacccaggt tcgggtccat aagcagtgac aattgcccta tgaagactcg
    94201 ctttcgctac ggctccggtg ggttccctta accaagccac tgcctatgag tcgccggctc
    94261 attcttcaac aggcacgcgg tcagagcccc gggctcctcc cactgcttgg gagcttacgg
    94321 tttcatgttc tatttcactc cccgatgggg gttcttttca cccttccctc acggtactac
    94381 ttcgctatcg gtcacccagg agtatttagc cttgcaaggt ggtccttgct gattcacacg
    94441 ggattccacg tgccccatgc tactcgggtc agagcataag ctaatgatgc tttcggctac
    94501 tggactctcg ccatctaggg tgcagcactc caccgcttcg cctagcagca cgacgcttgt
    94561 attgctctcc cacaaccccg ttttcacggt ttaggctgct cccatttcgc tcgccgctac
    94621 tacgggaatc gcttttgctt tcttttcctc tggttactaa gatgtttcag ttcgccaggt
    94681 tgtctcttgc ctgcccatgg attcagcagc agtttgaaag gttgacctat tcgggaatct
    94741 ccggatctac gcttattttc aactccccga agcatttcgt cgcttactac gcccttcctc
    94801 gtctctgggt gcctaggtat ccaccgtaag cctttcctcg tttgaacctc gcccttaact
    94861 ttaaggctat gccatcctaa ggtgctgcta aatggaagga tcttatcaac gtccatgaat
    94921 gataaatcat agatcgaact accgaatcgg aaaaattggg tgctatcata tagctttgta
    94981 ccggctaagt tcacgagttg gagataagcg gactcgaacc gctgacatcc gccacagggt
    95041 aaaccaccgc ctctcgggcc ccccgactga ttctaccata gaggccaacg ataaacaata
    95101 actccccccc gaacacagct tacaactttc atcgtactgt gctctccaaa gagcaactct
    95161 tctcaaaatc tcaaaaggtg ctgagttgga atcccattct aactaaggat tcttgtggtt
    95221 ccggaggatc cagctacagg aaacccagga acggagagct ttcccccttt ccgccccact
    95281 ctttggctta agaatgctgg ttttaagaat gagtgattgc ccttctccga cccttactgc
    95341 ccaacctgag agcggacagc taatgccttc cacttattga acagggttct atggtcggtc
    95401 cgcgacccct ggatgccgaa ggcgtccttg gggtgatctc gtagttccta cggggtggag
    95461 acgatggggt cggtccatgg attttccttc cttttgccgc atttcgctaa agggttgaag
    95521 ggggatagtg catcaagctg ttcgcaaggg ccaacttgat cctcttcccc agggatccca
    95581 gatgagggaa ccctaggaga gccgccgact ccaactatcg tccatgtacg atccatacta
    95641 gatctgacca actgcccatc ctacctcctc tacgttcttg acagcccatc tttgtctcag
    95701 tagagtcttt cagtggcatg tttcggtcct cttccccatt acttagaaag agtgagccac
    95761 cggttcaggt acaagatact atcattaccg cctggacaat tagacatcca acccgtaatc
    95821 gcaacgaccc aattgcaaga gcggagctct accaactgag ctatatcccc ccgagccaag
    95881 tggagcatgc atgaaggagt cagatgcttc ttctattctt ttctttggcg cagctgggcc
    95941 atcctggact tgaaccagag acctcgcccg tgaagtaaat catcgcacct acggtccaac
    96001 caattaggag agaatcaata gattcctttt cgggagcgat tcatccttcc cgaacgcagc
    96061 atacaactct ccgttgtact gcgctctcca agtgtgcttg ttcccccctt cttccttacc
    96121 atggcaagtc tttttgaaat aactccgatg agaagaaaaa agaaggcgtt aagagaccct
    96181 cctggcccca ccttagacac tctaagatcc tttttcaaac ctgctcccat ttcgagccaa
    96241 gagatagaca aatagacaca tcccattgca ctgatcggag gcgttcgtag tgactgaggg
    96301 ggtcgaagac caagaagtga gttatttatc agccaagcct tcttcttacg gctagatcca
    96361 atctcctggt ccctgcggaa aggaaaaaga atttcacgtt cttcctttcg ggaagggagg
    96421 gttaggaaaa tcctattgat tgcagctttc tccagacctc cgggaaaagc atgaaaaaaa
    96481 aaggctcgaa tggtacgatc cctccgtcgc cccagaatga aaggggcgat ctcgtagttc
    96541 ttggtctgtg aagatacgtt gttaggtgct ccattttatt ttcccattga ggccgaacct
    96601 aaacctgtgc tcgagagata gctgtccata cactgataag ggatgtatgg attctcgaga
    96661 agagaggagc catggtggtc ccccccggac cgcccggatc ccacgagtga atagaaagtt
    96721 ggatctacat tggatctcac ccgaatcgcc ccatctatcc tcctgaggag aagtttggtt
    96781 tcaaaccccg gttcgaacag gagaagtacg ccatgctaat gtgccttgga tgatccacat
    96841 ctcagggtca ggcgctgatg agcacattga actatccatg tggctgagag ccctcacagc
    96901 ccaggcacaa cgacgcaatt atcaggggcg cgctctacca ctgagctaat agcccgtcgt
    96961 gcgggcctct cgccgggggc ccgctatgcc aaaagcgaga gaaaccccat ccctctcttt
    97021 ccttttttcg cccccatgtc cctcccgcgt ggcgacatgg gggcgaaaaa aagggggatc
    97081 ctatcaactt gttccgacct aggataataa gctcatgagc ttggtcttac ttcaccgtcg
    97141 agaaacgaaa gaagacttcc gtcgacaagt ttaactcata cgtagctccc ttcttttggg
    97201 gtgtgaagca gtgtcaaacc aaaataccca acaagcatta cctctccctg aaaaggaggt
    97261 gatccagccg caccttccag tacggctacc ttgttacgac ttcactccag tcactagccc
    97321 tgccttcggc atccccctcc ttgcggttaa ggtaacgact tcgggcatgg ccagctccca
    97381 tagtgtgacg ggcggtgtgt acaaggcccg ggaacgaatt caccgccgta tggctgaccg
    97441 gcgattacta gcgattccgg cttcatgcag gcgagttgca gcctgcaatc cgaactgagg
    97501 acgggttttt ggagttagct caccctcgcg ggatcgcgac cctttgtccc ggccattgta
    97561 gcacgtgtgt cgcccagggc ataaggggca tgatgacttg acgtcatcct caccttcctc
    97621 cggcttatca ccggcagtct gttcagggtt ccaaactcaa cggtggcaac taaacacgag
    97681 ggttgcgctc gttgcgggac ttaacccaac accttacggc acgagctgac gacagccatg
    97741 caccacctgt gtccgcgttc ccgaaggcac ccctctcttt caagaggatt cgcggcatgt
    97801 caagccctgg taaggttctt cgctttgcat cgaattaaac cacatgctcc accgcttgtg
    97861 cgggcccccg tcaattcctt tgagtttcat tcttgcgaac gtactcccca ggcgggatac
    97921 ttaacgcgtt agctacagca ctgcacgggt cgatacgcac agcgcccagt atccatcgtt
    97981 tacggctagg actactgggg tatctaatcc cattcgctcc cctagctttc gtctctcagt
    98041 gtcagtgtcg gcccagcaga gtgctttcgc cgttggtgtt ctttccgatc tctacgcatt
    98101 tcaccgctcc accggaaatt ccctctgccc ctaccgtact ccagcttggc agtttccacc
    98161 gcctgtccag ggttgagccc tgggatttga cggcggactt aaaaagccac ctacagacgc
    98221 tttacgccca atcattccgg ataacgcttg catcctctgt attaccgcgg ctgctggcac
    98281 agagttagcc gatgcttatt ccccagatac cgtcattgct tcttctccgg gaaaagaagt
    98341 tcacgacccg taggccttct acctccacgc ggcattgctc cgtcaggctt tcgcccattg
    98401 cggaaaattc cccactgctg cctcccgtag gagtctgggc cgtgtctcag tcccagtgtg
    98461 gctgatcatc ctctcggacc agctactgat catcgccttg gtaagctatt gcctcaccaa
    98521 ctagctaatc agacgcgagc ccctcctcgg gcggattcct ccttttgctc ctcagcctac
    98581 ggggtattag cagccgtttc cagctgttgt tcccctccca agggcaggtt cttacgcgtt
    98641 actcacccgt ccgccactgg aaacaccact tcccgtccga cttgcatgtg ttaagcatgc
    98701 cgccagcgtt catcctgagc caggatcgaa ctctccatga gattcttagt tgcattactt
    98761 atagcttcct tattcgtaga caaagctgat tcggaactgt ctttcatttc aaggcataac
    98821 ttgtatccat gcgcttcata ttcgcttaga gttcgctcca agaaatatag ccgtccctac
    98881 cccctcacgt caatcccacg agcctcttat ccattcgatc acgacggcgg gggagcaagt
    98941 caaaatagaa aaactcacat tgggtttagg gataatcagg ctcgaactga tgacttccac
    99001 cacgtcaagg tgacactcta ccgctgagtt atatcccttc ccttgccccc atcgagaaat
    99061 agaactgact aatccgaagg caaagggtcg agaaactcaa cgccactact tttgaacaac
    99121 ttggagtcgg tccttctttt cgcaccatta cggatacgaa aataatggga aaaattggat
    99181 tcaattgtca actgctccta tcggaaatag gattgactac ggattcgagc catagcacat
    99241 ggtttcataa aagcgtatga ttttcccgat ctaaataaag caggttttac atgaagaaga
    99301 tttggctcag catgttctat tcgatacggg taggagaaga ccccgactcg gtattcttaa
    99361 aaaaatagag aaatcagaac caagtcaaga tgatacggat caaccccttc ttcttgcgcc
    99421 aaagatctta ctatttccga aggaactgga gttccatctc ttttccattc aagagttctt
    99481 atgtgtttcc acgccccttt gagaccccga aaaatggaca aattcctttt cttaggaaca
    99541 catacaagat tcgtcactac aaaaaggata atggtaaccc caccattaac tatttcattt
    99601 attaactact tcatttatga atttcatagt aatagaaata aaatacatat atatcctacc
    99661 gagacagaat ttgtaacttg ctatcctctt gcctagcagg caaagattta cctccgtgga
    99721 aaggatgatt cattcggatc gacatgagag tccaactaca ttgcattgct agaatccatg
    99781 ttgtatattt gaaagaggtt gacctccttg cttctctcat ggtacaatcc tcttctcgct
    99841 aagccccttt ctcctcggtc cacagagaca aaatgtagga ctggtgccaa cagttcatca
    99901 caaaggactc actgagccag gatcactaac taatactaat ctattactaa tagaaaatac
    99961 taatactaat ataatagata gaatagaaaa gaactgtctt ttctttatac tttcgccggt
   100021 tccgttgcta ccgcgtgctt tacgcaatcg atcggatcat atagatatcc cttcaacaca
   100081 acataggtcg tcgaaaggat ctcggagacc caccaaagca cgaaagccag gatctttcag
   100141 aaaaaggatt cctattcgaa gagtgcataa ccgcatggat aagctcacac taacccgtca
   100201 atttgggatc caattcggga ttttccttgg gaggtgtcgg gaaggaattg gaatgtaata
   100261 atatcgattc atacagatat agaagaatct ctattgattc aaaggctgta cctataggcc
   100321 tataggatag ggctagcgaa agaggaaaaa accgaagatt tcacatagta cttttgatcg
   100381 aaaaatcaat ctgatttatt tcgtaccctt cgctcagtga gaaaatgggt cagattctac
   100441 aggatcaaac ctatgggact taaggaatga cggaagggaa taaaaaagaa ataaataaaa
   100501 atgaagtaga agagcccaga ttccaaatga acaaattcaa acttgaaaaa aatctttctg
   100561 attctcgaag aatgaggggc aaagggattg atcgagaaag atctcttgtt cttattataa
   100621 gatcgtgatt ggatccacat atgtttggta aaaagaagaa tcttctcctt tgagaataat
   100681 caaaaaaaga aagtgttcaa ttggaacatg aaaacgtgac taaatttgtc ctagttactc
   100741 ttggggacgg agtggatgaa gggaggagct tctcgaacga ggaaagggat ccaatgactt
   100801 cgaaagaatt gaacgaggag ccgtatgagg tgaaaatctc atgtacggtt ctgtagagtg
   100861 gcagtaagga tgacttatct gtcaactttt c
//
