# Supplementary material for: Resolving Recalcitrant Clades in the Pantropical Ochnaceae: Insights From Comparative Phylogenomics of Plastome and Nuclear Genomic Data Derived From Targeted Sequencing
Source: Front Plant Sci. 2021 Feb 4;12:638650. doi: 10.3389/fpls.2021.638650 (PMC7890083; doi:10.3389/fpls.2021.638650)
Supplement: Supplementary Data 1 — Annotated de novo reference contig (Ouratea bahiensis) before and after removal of the inverted repeat (in different file formats). [file Data_Sheet_1.ZIP › size138408_GeSeqEdit100891.gff]

##gff-version 3
##source-version geneious 11.1.5
##sequence-region	size138408_GeSeqEdit100891	1	100891
size138408_GeSeqEdit100891	blatX	CDS	24962	25084	.	-	1	ID=cds-blatx_psbJ_1
size138408_GeSeqEdit100891	blatX	gene	20995	21549	91.6	+	1	ID=gene-blatx_ycf4_1;Note=blatX_hit_ycf4_NC_036341.1%2C_position_1_-_555%2C_psl_score_91.6%2C_coverage_100.00%25%2C_match_91.53%25
size138408_GeSeqEdit100891	blatX	gene	82259	82564	93.8	+	1	ID=gene-blatx_ndhE_1;Note=blatX_hit_ndhE_NC_036341.1%2C_position_1_-_306%2C_psl_score_93.8%2C_coverage_100.00%25%2C_match_93.79%25
size138408_GeSeqEdit100891	blatN	intron	95034	95832	.	-	1	ID=blatn_trnA-UGC_1_intron_1;Parent=gene-blatn_trnA-UGC_1
size138408_GeSeqEdit100891	blatN	tRNA	69631	69704	.	+	1	ID=trna-blatn_trnR-ACG_2
size138408_GeSeqEdit100891	blatN	tRNA	91175	91248	.	-	1	ID=trna-blatn_trnR-ACG_1
size138408_GeSeqEdit100891	blatX	CDS	33330	34856	.	+	1	ID=cds-blatx_psbB_2
size138408_GeSeqEdit100891	blatX	intron	56895	57577	.	-	1	ID=blatx_ndhB_2_intron_1;Parent=gene-blatx_ndhB_2
size138408_GeSeqEdit100891	blatX	gene	33330	34856	93.4	+	1	ID=gene-blatx_psbB_2;Note=blatX_hit_psbB_NC_036341.1%2C_position_1_-_1527%2C_psl_score_93.4%2C_coverage_100.00%25%2C_match_93.32%25
size138408_GeSeqEdit100891	blatX	CDS	41735	42103	.	-	1	ID=cds-blatx_rpl14_1
size138408_GeSeqEdit100891	blatN	gene	91836	91938	98.1	-	1	ID=gene-blatn_rrn4.5_1;Note=blatN_hit_rrn4.5_NC_036341.1%2C_position_1_-_103%2C_psl_score_98.1%2C_coverage_100.00%25%2C_match_98.06%25
size138408_GeSeqEdit100891	blatX	CDS	82259	82564	.	+	1	ID=cds-blatx_ndhE_1
size138408_GeSeqEdit100891	blatN	gene	68941	69043	98.1	+	1	ID=gene-blatn_rrn4.5_2;Note=blatN_hit_rrn4.5_NC_036341.1%2C_position_1_-_103%2C_psl_score_98.1%2C_coverage_100.00%25%2C_match_98.06%25
size138408_GeSeqEdit100891	blatN	gene	95935	96955	69.5	-	1	ID=gene-blatn_trnI-GAU_1;Note=blatN_hit_trnI-GAU_NC_036341.1%2C_position_1_-_72%2C_psl_score_69.5%2C_coverage_100.00%25%2C_match_100.00%25
size138408_GeSeqEdit100891	blatX	CDS	20995	21549	.	+	1	ID=cds-blatx_ycf4_1
size138408_GeSeqEdit100891	blatX	gene	24962	25084	96.8	-	1	ID=gene-blatx_psbJ_1;Note=blatX_hit_psbJ_NC_036341.1%2C_position_1_-_123%2C_psl_score_96.8%2C_coverage_100.00%25%2C_match_96.75%25
size138408_GeSeqEdit100891	blatN	tRNA	27067	27140	.	-	1	ID=trna-blatn_trnW-CCA_1
size138408_GeSeqEdit100891	blatN	gene	63924	64944	69.5	+	1	ID=gene-blatn_trnI-GAU_2;Note=blatN_hit_trnI-GAU_NC_036341.1%2C_position_1_-_72%2C_psl_score_69.5%2C_coverage_100.00%25%2C_match_100.00%25
size138408_GeSeqEdit100891	blatX	CDS	20444	20557	.	+	1	ID=cds-blatx_psaI_1
size138408_GeSeqEdit100891	blatX	CDS	26596	26685	.	+	1	ID=cds-blatx_petL_1
size138408_GeSeqEdit100891	blatX	gene	40489	40602	88.6	-	1	ID=gene-blatx_rpl36_1;Note=blatX_hit_rpl36_NC_036341.1%2C_position_1_-_114%2C_psl_score_88.6%2C_coverage_100.00%25%2C_match_88.60%25
size138408_GeSeqEdit100891	blatX	CDS	38248	38743	.	+	1	ID=cds-blatx_petD_1
size138408_GeSeqEdit100891	blatX	CDS	22128	22811	.	+	1	ID=cds-blatx_cemA_1
size138408_GeSeqEdit100891	blatX	gene	26596	26685	88.9	+	1	ID=gene-blatx_petL_1;Note=blatX_hit_petL_NC_036341.1%2C_position_13_-_102%2C_psl_score_88.9%2C_coverage_88.24%25%2C_match_78.43%25
size138408_GeSeqEdit100891	blatN	rRNA	91836	91938	.	-	1	ID=rrna-blatn_rrn4.5_1
size138408_GeSeqEdit100891	blatN	rRNA	68941	69043	.	+	1	ID=rrna-blatn_rrn4.5_2
size138408_GeSeqEdit100891	blatN	rRNA	91491	91611	.	-	1	ID=rrna-blatn_rrn5_1
size138408_GeSeqEdit100891	blatN	rRNA	69268	69388	.	+	1	ID=rrna-blatn_rrn5_2
size138408_GeSeqEdit100891	blatX	CDS	76663	76934	.	+	1	ID=cds-blatx_rps15_1
size138408_GeSeqEdit100891	blatX	gene	38248	38743	93.0	+	1	ID=gene-blatx_petD_1;Note=blatX_hit_petD_NC_036341.1%2C_position_5_-_500%2C_psl_score_93.0%2C_coverage_99.00%25%2C_match_92.02%25
size138408_GeSeqEdit100891	blatX	gene	20444	20557	94.8	+	1	ID=gene-blatx_psaI_1;Note=blatX_hit_psaI_NC_036341.1%2C_position_1_-_114%2C_psl_score_94.8%2C_coverage_100.00%25%2C_match_94.74%25
size138408_GeSeqEdit100891	blatX	exon	56139	56894	.	-	1	ID=blatx_ndhB_2_exon_2;Parent=gene-blatx_ndhB_2
size138408_GeSeqEdit100891	blatX	exon	57578	58354	.	-	1	ID=blatx_ndhB_2_exon_1;Parent=gene-blatx_ndhB_2
size138408_GeSeqEdit100891	blatX	gene	87024	89237	86.4	+	1	ID=gene-blatx_ndhF_1;Note=blatX_hit_ndhF_NC_036341.1%2C_position_1_-_2253%2C_psl_score_86.4%2C_coverage_97.36%25%2C_match_79.38%25
size138408_GeSeqEdit100891	blatX	intron	1178	1709	.	+	1	ID=blatx_rps12_3_intron_1
size138408_GeSeqEdit100891	blatN	tRNA	27338	27411	.	-	1	ID=trna-blatn_trnP-UGG_1
size138408_GeSeqEdit100891	blatX	CDS	40489	40602	.	-	1	ID=cds-blatx_rpl36_1
size138408_GeSeqEdit100891	blatX	exon	944	1177	.	+	1	ID=trsp_rps12_1_exon_2;Parent=gene-trsp_rps12_1
size138408_GeSeqEdit100891	blatX	exon	59754	59987	.	-	1	ID=trsp_rps12_1_exon_2;Parent=gene-trsp_rps12_1
size138408_GeSeqEdit100891	blatX	exon	1710	1734	.	+	1	ID=trsp_rps12_1_exon_3;Parent=gene-trsp_rps12_1
size138408_GeSeqEdit100891	blatX	exon	59197	59221	.	-	1	ID=trsp_rps12_1_exon_3;Parent=gene-trsp_rps12_1
size138408_GeSeqEdit100891	blatX	gene	22128	22811	90.5	+	1	ID=gene-blatx_cemA_1;Note=blatX_hit_cemA_NC_036341.1%2C_position_7_-_690%2C_psl_score_90.5%2C_coverage_99.13%25%2C_match_89.71%25
size138408_GeSeqEdit100891	blatN	gene	94999	95870	71.3	-	1	ID=gene-blatn_trnA-UGC_1;Note=blatN_hit_trnA-UGC_NC_036341.1%2C_position_1_-_73%2C_psl_score_71.3%2C_coverage_100.00%25%2C_match_100.00%25
size138408_GeSeqEdit100891	blatN	gene	65009	65880	71.3	+	1	ID=gene-blatn_trnA-UGC_2;Note=blatN_hit_trnA-UGC_NC_036341.1%2C_position_1_-_73%2C_psl_score_71.3%2C_coverage_100.00%25%2C_match_100.00%25
size138408_GeSeqEdit100891	blatX	exon	45559	45991	.	-	1	ID=blatx_rpl2_2_exon_2;Parent=gene-blatx_rpl2_2
size138408_GeSeqEdit100891	blatX	exon	46660	47050	.	-	1	ID=blatx_rpl2_2_exon_1;Parent=gene-blatx_rpl2_2
size138408_GeSeqEdit100891	blatN	gene	69268	69388	99.2	+	1	ID=gene-blatn_rrn5_2;Note=blatN_hit_rrn5_NC_036341.1%2C_position_1_-_121%2C_psl_score_99.2%2C_coverage_100.00%25%2C_match_99.17%25
size138408_GeSeqEdit100891	blatX	CDS	87024	89237	.	+	1	ID=cds-blatx_ndhF_1
size138408_GeSeqEdit100891	blatX	intron	31970	32817	.	-	1	ID=blatx_clpP_1_intron_1;Parent=gene-blatx_clpP_1
size138408_GeSeqEdit100891	blatX	intron	31090	31678	.	-	1	ID=blatx_clpP_1_intron_2;Parent=gene-blatx_clpP_1
size138408_GeSeqEdit100891	blatX	intron	45992	46659	.	-	1	ID=blatx_rpl2_2_intron_1;Parent=gene-blatx_rpl2_2
size138408_GeSeqEdit100891	blatN	gene	91491	91611	99.2	-	1	ID=gene-blatn_rrn5_1;Note=blatN_hit_rrn5_NC_036341.1%2C_position_1_-_121%2C_psl_score_99.2%2C_coverage_100.00%25%2C_match_99.17%25
size138408_GeSeqEdit100891	blatX	exon	80011	80550	.	+	1	ID=blatx_ndhA_1_exon_2;Parent=gene-blatx_ndhA_1
size138408_GeSeqEdit100891	blatX	exon	78269	78775	.	+	1	ID=blatx_ndhA_1_exon_1;Parent=gene-blatx_ndhA_1
size138408_GeSeqEdit100891	blatN	tRNA	86115	86194	.	-	1	ID=trna-blatn_trnL-UAG_1
size138408_GeSeqEdit100891	blatX	gene	41735	42103	88.9	-	1	ID=gene-blatx_rpl14_1;Note=blatX_hit_rpl14_NC_036341.1%2C_position_1_-_369%2C_psl_score_88.9%2C_coverage_100.00%25%2C_match_88.89%25
size138408_GeSeqEdit100891	blatX	CDS	13186	13584	.	-	1	ID=cds-blatx_atpE_1
size138408_GeSeqEdit100891	blatX	gene	13186	13584	92.5	-	1	ID=gene-blatx_atpE_1;Note=blatX_hit_atpE_NC_036341.1%2C_position_1_-_399%2C_psl_score_92.5%2C_coverage_97.79%25%2C_match_90.44%25
size138408_GeSeqEdit100891	blatN	exon	65846	65880	.	+	1	ID=blatn_trnA-UGC_2_exon_2;Parent=gene-blatn_trnA-UGC_2
size138408_GeSeqEdit100891	blatN	gene	12858	12930	97.3	+	1	ID=gene-blatn_trnM-CAU_1;Note=blatN_hit_trnM-CAU_NC_036341.1%2C_position_1_-_73%2C_psl_score_97.3%2C_coverage_100.00%25%2C_match_97.26%25
size138408_GeSeqEdit100891	blatN	tRNA	47516	47589	.	-	1	ID=trna-blatn_trnI-CAU_2
size138408_GeSeqEdit100891	blatN	exon	65009	65046	.	+	1	ID=blatn_trnA-UGC_2_exon_1;Parent=gene-blatn_trnA-UGC_2
size138408_GeSeqEdit100891	blatX	gene	43961	44623	86.7	-	1	ID=gene-blatx_rps3_1;Note=blatX_hit_rps3_NC_036341.1%2C_position_1_-_657%2C_psl_score_86.7%2C_coverage_100.91%25%2C_match_87.67%25
size138408_GeSeqEdit100891	blatX	gene	85034	86005	87.5	-	1	ID=gene-blatx_ccsA_1;Note=blatX_hit_ccsA_NC_036341.1%2C_position_1_-_972%2C_psl_score_87.5%2C_coverage_100.00%25%2C_match_85.91%25
size138408_GeSeqEdit100891	blatX	gene	47678	54489	96.4	+	1	ID=gene-blatx_ycf2_2;Note=blatX_hit_ycf2_NC_036341.1%2C_position_1_-_6875%2C_psl_score_96.4%2C_coverage_98.77%25%2C_match_94.81%25
size138408_GeSeqEdit100891	blatX	CDS	25227	25343	.	-	1	ID=cds-blatx_psbL_1
size138408_GeSeqEdit100891	blatX	intron	78776	80010	.	+	1	ID=blatx_ndhA_1_intron_1;Parent=gene-blatx_ndhA_1
size138408_GeSeqEdit100891	blatN	tRNA	70307	70378	.	-	1	ID=trna-blatn_trnN-GUU_2
size138408_GeSeqEdit100891	blatX	gene	47069	47350	99.0	-	1	ID=gene-blatx_rpl23_2;Note=blatX_hit_rpl23_NC_036341.1%2C_position_1_-_282%2C_psl_score_99.0%2C_coverage_100.00%25%2C_match_98.94%25
size138408_GeSeqEdit100891	blatN	exon	64910	64944	.	+	1	ID=blatn_trnI-GAU_2_exon_2;Parent=gene-blatn_trnI-GAU_2
size138408_GeSeqEdit100891	blatN	tRNA	90501	90572	.	+	1	ID=trna-blatn_trnN-GUU_1
size138408_GeSeqEdit100891	blatN	exon	63924	63960	.	+	1	ID=blatn_trnI-GAU_2_exon_1;Parent=gene-blatn_trnI-GAU_2
size138408_GeSeqEdit100891	blatX	CDS	43961	44623	.	-	1	ID=cds-blatx_rps3_1
size138408_GeSeqEdit100891	blatX	CDS	42227	42629	.	-	1	ID=cds-blatx_rpl16_1
size138408_GeSeqEdit100891	blatN	intron	12056	12648	.	-	1	ID=blatn_trnV-UAC_1_intron_1;Parent=gene-blatn_trnV-UAC_1
size138408_GeSeqEdit100891	blatX	CDS	47678	54489	.	+	1	ID=cds-blatx_ycf2_2
size138408_GeSeqEdit100891	blatX	gene	25227	25343	95.8	-	1	ID=gene-blatx_psbL_1;Note=blatX_hit_psbL_NC_036341.1%2C_position_1_-_117%2C_psl_score_95.8%2C_coverage_100.00%25%2C_match_95.73%25
size138408_GeSeqEdit100891	blatN	rRNA	97252	98742	.	-	1	ID=rrna-blatn_rrn16_1
size138408_GeSeqEdit100891	blatN	rRNA	62137	63627	.	+	1	ID=rrna-blatn_rrn16_2
size138408_GeSeqEdit100891	blatX	CDS	82822	83067	.	+	1	ID=cds-blatx_psaC_1
size138408_GeSeqEdit100891	blatX	CDS	85034	86005	.	-	1	ID=cds-blatx_ccsA_1
size138408_GeSeqEdit100891	blatX	exon	30581	30694	.	-	1	ID=trsp_rps12_1_exon_1;Parent=gene-trsp_rps12_1
size138408_GeSeqEdit100891	blatN	gene	5401	5481	100.0	+	1	ID=gene-blatn_trnL-CAA_3;Note=blatN_hit_trnL-CAA_NC_036341.1%2C_position_1_-_81%2C_psl_score_100.0%2C_coverage_100.00%25%2C_match_100.00%25
size138408_GeSeqEdit100891	blatN	tRNA	63924	63960	.	+	1	ID=trna-blatn_trnI-GAU_2
size138408_GeSeqEdit100891	blatN	tRNA	64910	64944	.	+	1	ID=trna-blatn_trnI-GAU_2
size138408_GeSeqEdit100891	blatN	tRNA	96919	96955	.	-	1	ID=trna-blatn_trnI-GAU_1
size138408_GeSeqEdit100891	blatN	tRNA	95935	95969	.	-	1	ID=trna-blatn_trnI-GAU_1
size138408_GeSeqEdit100891	blatN	gene	27338	27411	100.0	-	1	ID=gene-blatn_trnP-UGG_1;Note=blatN_hit_trnP-UGG_NC_036341.1%2C_position_1_-_74%2C_psl_score_100.0%2C_coverage_100.00%25%2C_match_100.00%25
size138408_GeSeqEdit100891	blatX	gene	82822	83067	92.7	+	1	ID=gene-blatx_psaC_1;Note=blatX_hit_psaC_NC_036341.1%2C_position_1_-_246%2C_psl_score_92.7%2C_coverage_100.00%25%2C_match_92.68%25
size138408_GeSeqEdit100891	blatN	gene	55450	55530	100.0	-	1	ID=gene-blatn_trnL-CAA_2;Note=blatN_hit_trnL-CAA_NC_036341.1%2C_position_1_-_81%2C_psl_score_100.0%2C_coverage_100.00%25%2C_match_100.00%25
size138408_GeSeqEdit100891	blatX	gene	76663	76934	86.4	+	1	ID=gene-blatx_rps15_1;Note=blatX_hit_rps15_NC_036341.1%2C_position_1_-_272%2C_psl_score_86.4%2C_coverage_99.63%25%2C_match_86.08%25
size138408_GeSeqEdit100891	blatX	CDS	6442	10046	.	-	1	ID=cds-blatx_ycf2-fragment_1
size138408_GeSeqEdit100891	blatX	gene	70718	76254	83.9	+	1	ID=gene-blatx_ycf1_1;Note=blatX_hit_ycf1_NC_036341.1%2C_position_1_-_5621%2C_psl_score_83.9%2C_coverage_98.44%25%2C_match_66.72%25
size138408_GeSeqEdit100891	blatN	gene	62137	63627	99.6	+	1	ID=gene-blatn_rrn16_2;Note=blatN_hit_rrn16_NC_036341.1%2C_position_1_-_1491%2C_psl_score_99.6%2C_coverage_100.00%25%2C_match_99.53%25
size138408_GeSeqEdit100891	blatX	gene	83202	84703	88.1	+	1	ID=gene-blatx_ndhD_1;Note=blatX_hit_ndhD_NC_036341.1%2C_position_1_-_1503%2C_psl_score_88.1%2C_coverage_99.93%25%2C_match_87.96%25
size138408_GeSeqEdit100891	blatN	exon	12019	12055	.	-	1	ID=blatn_trnV-UAC_1_exon_2;Parent=gene-blatn_trnV-UAC_1
size138408_GeSeqEdit100891	blatX	CDS	70718	76254	.	+	1	ID=cds-blatx_ycf1_1
size138408_GeSeqEdit100891	blatN	exon	12649	12685	.	-	1	ID=blatn_trnV-UAC_1_exon_1;Parent=gene-blatn_trnV-UAC_1
size138408_GeSeqEdit100891	blatN	tRNA	61841	61912	.	+	1	ID=trna-blatn_trnV-GAC_2
size138408_GeSeqEdit100891	blatN	tRNA	98967	99038	.	-	1	ID=trna-blatn_trnV-GAC_1
size138408_GeSeqEdit100891	blatX	CDS	83202	84703	.	+	1	ID=cds-blatx_ndhD_1
size138408_GeSeqEdit100891	blatN	tRNA	12649	12685	.	-	1	ID=trna-blatn_trnV-UAC_1
size138408_GeSeqEdit100891	blatN	tRNA	12019	12055	.	-	1	ID=trna-blatn_trnV-UAC_1
size138408_GeSeqEdit100891	blatX	gene	35011	35118	98.2	+	1	ID=gene-blatx_psbT_2;Note=blatX_hit_psbT_NC_036341.1%2C_position_1_-_108%2C_psl_score_98.2%2C_coverage_100.00%25%2C_match_98.15%25
size138408_GeSeqEdit100891	blatX	CDS	26844	26957	.	+	1	ID=cds-blatx_petG_1
size138408_GeSeqEdit100891	blatN	intron	95970	96918	.	-	1	ID=blatn_trnI-GAU_1_intron_1;Parent=gene-blatn_trnI-GAU_1
size138408_GeSeqEdit100891	blatX	CDS	27777	27911	.	+	1	ID=cds-blatx_psaJ_1
size138408_GeSeqEdit100891	blatX	CDS	46660	47050	.	-	1	ID=cds-blatx_rpl2_2
size138408_GeSeqEdit100891	blatX	CDS	45559	45991	.	-	1	ID=cds-blatx_rpl2_2
size138408_GeSeqEdit100891	blatX	CDS	28801	29106	.	+	1	ID=cds-blatx_rps18_1
size138408_GeSeqEdit100891	blatN	gene	97252	98742	99.6	-	1	ID=gene-blatn_rrn16_1;Note=blatN_hit_rrn16_NC_036341.1%2C_position_1_-_1491%2C_psl_score_99.6%2C_coverage_100.00%25%2C_match_99.53%25
size138408_GeSeqEdit100891	blatX	gene	45559	47050	94.6	-	1	ID=gene-blatx_rpl2_2;Note=blatX_hit_rpl2_NC_036341.1%2C_position_1_-_833%2C_psl_score_94.6%2C_coverage_98.80%25%2C_match_95.80%25
size138408_GeSeqEdit100891	blatX	CDS	35011	35118	.	+	1	ID=cds-blatx_psbT_2
size138408_GeSeqEdit100891	blatX	gene	26844	26957	96.5	+	1	ID=gene-blatx_petG_1;Note=blatX_hit_petG_NC_036341.1%2C_position_1_-_114%2C_psl_score_96.5%2C_coverage_100.00%25%2C_match_96.49%25
size138408_GeSeqEdit100891	blatX	gene	27777	27911	94.9	+	1	ID=gene-blatx_psaJ_1;Note=blatX_hit_psaJ_NC_036341.1%2C_position_1_-_135%2C_psl_score_94.9%2C_coverage_100.00%25%2C_match_94.81%25
size138408_GeSeqEdit100891	blatX	CDS	25370	25489	.	-	1	ID=cds-blatx_psbF_1
size138408_GeSeqEdit100891	blatX	CDS	35179	35310	.	-	1	ID=cds-blatx_pbf1_2
size138408_GeSeqEdit100891	blatX	CDS	18162	19669	.	+	1	ID=cds-blatx_accD_1
size138408_GeSeqEdit100891	blatX	gene	89348	90161	94.7	-	1	ID=gene-blatx_ycf1-fragment_1;Note=blatX_hit_ycf1-fragment_NC_036341.1%2C_position_1_-_802%2C_psl_score_94.7%2C_coverage_14.47%25%2C_match_13.65%25%2C_fragment_match_95.76%25
size138408_GeSeqEdit100891	blatX	gene	80640	81104	89.9	+	1	ID=gene-blatx_ndhI_1;Note=blatX_hit_ndhI_NC_036341.1%2C_position_1_-_465%2C_psl_score_89.9%2C_coverage_97.48%25%2C_match_87.63%25
size138408_GeSeqEdit100891	blatN	intron	63961	64909	.	+	1	ID=blatn_trnI-GAU_2_intron_1;Parent=gene-blatn_trnI-GAU_2
size138408_GeSeqEdit100891	blatX	gene	25370	25489	94.2	-	1	ID=gene-blatx_psbF_1;Note=blatX_hit_psbF_NC_036341.1%2C_position_1_-_120%2C_psl_score_94.2%2C_coverage_100.00%25%2C_match_94.17%25
size138408_GeSeqEdit100891	blatN	tRNA	12858	12930	.	+	1	ID=trna-blatn_trnM-CAU_1
size138408_GeSeqEdit100891	blatX	CDS	28405	28604	.	+	1	ID=cds-blatx_rpl33_1
size138408_GeSeqEdit100891	blatX	CDS	80640	81104	.	+	1	ID=cds-blatx_ndhI_1
size138408_GeSeqEdit100891	blatN	gene	86115	86194	100.0	-	1	ID=gene-blatn_trnL-UAG_1;Note=blatN_hit_trnL-UAG_NC_036341.1%2C_position_1_-_80%2C_psl_score_100.0%2C_coverage_100.00%25%2C_match_100.00%25
size138408_GeSeqEdit100891	blatX	gene	28801	29106	94.5	+	1	ID=gene-blatx_rps18_1;Note=blatX_hit_rps18_NC_036341.1%2C_position_1_-_306%2C_psl_score_94.5%2C_coverage_100.00%25%2C_match_94.44%25
size138408_GeSeqEdit100891	blatX	gene	18162	19669	86.8	+	1	ID=gene-blatx_accD_1;Note=blatX_hit_accD_NC_036341.1%2C_position_1_-_1505%2C_psl_score_86.8%2C_coverage_100.13%25%2C_match_82.47%25
size138408_GeSeqEdit100891	blatX	CDS	78269	78775	.	+	1	ID=cds-blatx_ndhA_1
size138408_GeSeqEdit100891	blatX	CDS	80011	80550	.	+	1	ID=cds-blatx_ndhA_1
size138408_GeSeqEdit100891	blatX	CDS	13581	15077	.	-	1	ID=cds-blatx_atpB_1
size138408_GeSeqEdit100891	blatX	CDS	45280	45498	.	-	1	ID=cds-blatx_rps19_2
size138408_GeSeqEdit100891	blatN	gene	27067	27140	96.0	-	1	ID=gene-blatn_trnW-CCA_1;Note=blatN_hit_trnW-CCA_NC_036341.1%2C_position_1_-_74%2C_psl_score_96.0%2C_coverage_100.00%25%2C_match_95.95%25
size138408_GeSeqEdit100891	blatX	gene	13581	15077	93.5	-	1	ID=gene-blatx_atpB_1;Note=blatX_hit_atpB_NC_036341.1%2C_position_1_-_1497%2C_psl_score_93.5%2C_coverage_100.00%25%2C_match_93.45%25
size138408_GeSeqEdit100891	blatX	gene	78269	80550	87.6	+	1	ID=gene-blatx_ndhA_1;Note=blatX_hit_ndhA_NC_036341.1%2C_position_55_-_1095%2C_psl_score_87.6%2C_coverage_95.62%25%2C_match_85.30%25
size138408_GeSeqEdit100891	blatX	exon	32818	32886	.	-	1	ID=blatx_clpP_1_exon_1;Parent=gene-blatx_clpP_1
size138408_GeSeqEdit100891	blatX	exon	31679	31969	.	-	1	ID=blatx_clpP_1_exon_2;Parent=gene-blatx_clpP_1
size138408_GeSeqEdit100891	blatN	exon	94999	95033	.	-	1	ID=blatn_trnA-UGC_1_exon_2;Parent=gene-blatn_trnA-UGC_1
size138408_GeSeqEdit100891	blatX	exon	30862	31089	.	-	1	ID=blatx_clpP_1_exon_3;Parent=gene-blatx_clpP_1
size138408_GeSeqEdit100891	blatX	CDS	39953	40369	.	-	1	ID=cds-blatx_rps11_1
size138408_GeSeqEdit100891	blatN	exon	95833	95870	.	-	1	ID=blatn_trnA-UGC_1_exon_1;Parent=gene-blatn_trnA-UGC_1
size138408_GeSeqEdit100891	blatX	gene	59197	59987	94.8	-	1	ID=gene-trsp_rps12_1;Note=blatX_hit_rps12-fragment_NC_036341.1%2C_position_1_-_114%2C_psl_score_94.8%2C_coverage_30.65%25%2C_match_29.03%25%2C_fragment_match_94.74%25%25_blatX_hit_rps12_NC_036341.1%2C_position_114_-_372%2C_psl_score_88.9%2C_coverage_69.62%25%2C_match_67.20%25
size138408_GeSeqEdit100891	blatX	gene	30581	30694	94.8	-	1	ID=gene-trsp_rps12_1;Note=blatX_hit_rps12-fragment_NC_036341.1%2C_position_1_-_114%2C_psl_score_94.8%2C_coverage_30.65%25%2C_match_29.03%25%2C_fragment_match_94.74%25%25_blatX_hit_rps12_NC_036341.1%2C_position_114_-_372%2C_psl_score_88.9%2C_coverage_69.62%25%2C_match_67.20%25
size138408_GeSeqEdit100891	blatX	gene	30581	30694	94.8	-	1	ID=gene-trsp_rps12_1;Note=blatX_hit_rps12-fragment_NC_036341.1%2C_position_1_-_114%2C_psl_score_94.8%2C_coverage_30.65%25%2C_match_29.03%25%2C_fragment_match_94.74%25%25_blatX_hit_rps12_NC_036341.1%2C_position_114_-_372%2C_psl_score_88.9%2C_coverage_69.62%25%2C_match_67.20%25
size138408_GeSeqEdit100891	blatX	gene	30581	30694	94.8	-	1	ID=gene-trsp_rps12_1;Note=blatX_hit_rps12-fragment_NC_036341.1%2C_position_1_-_114%2C_psl_score_94.8%2C_coverage_30.65%25%2C_match_29.03%25%2C_fragment_match_94.74%25%25_blatX_hit_rps12_NC_036341.1%2C_position_114_-_372%2C_psl_score_88.9%2C_coverage_69.62%25%2C_match_67.20%25
size138408_GeSeqEdit100891	blatX	gene	944	1734	94.8	-	1	ID=gene-trsp_rps12_1;Note=blatX_hit_rps12-fragment_NC_036341.1%2C_position_1_-_114%2C_psl_score_94.8%2C_coverage_30.65%25%2C_match_29.03%25%2C_fragment_match_94.74%25%25_blatX_hit_rps12_NC_036341.1%2C_position_114_-_372%2C_psl_score_88.9%2C_coverage_69.62%25%2C_match_67.20%25
size138408_GeSeqEdit100891	blatX	gene	44753	45094	83.7	-	1	ID=gene-blatx_rpl22_1;Note=blatX_hit_rpl22_NC_036341.1%2C_position_24_-_365%2C_psl_score_83.7%2C_coverage_87.02%25%2C_match_72.77%25
size138408_GeSeqEdit100891	blatX	gene	2577	4792	97.3	+	1	ID=gene-blatx_ndhB_3;Note=blatX_hit_ndhB_NC_036341.1%2C_position_1_-_1533%2C_psl_score_97.3%2C_coverage_100.00%25%2C_match_98.63%25
size138408_GeSeqEdit100891	blatX	CDS	29410	29754	.	-	1	ID=cds-blatx_rpl20_1
size138408_GeSeqEdit100891	blatX	CDS	25499	25750	.	-	1	ID=cds-blatx_psbE_1
size138408_GeSeqEdit100891	blatX	gene	25499	25750	95.7	-	1	ID=gene-blatx_psbE_1;Note=blatX_hit_psbE_NC_036341.1%2C_position_1_-_252%2C_psl_score_95.7%2C_coverage_100.00%25%2C_match_95.63%25
size138408_GeSeqEdit100891	blatN	gene	91175	91248	100.0	-	1	ID=gene-blatn_trnR-ACG_1;Note=blatN_hit_trnR-ACG_NC_036341.1%2C_position_1_-_74%2C_psl_score_100.0%2C_coverage_100.00%25%2C_match_100.00%25
size138408_GeSeqEdit100891	blatN	gene	69631	69704	100.0	+	1	ID=gene-blatn_trnR-ACG_2;Note=blatN_hit_trnR-ACG_NC_036341.1%2C_position_1_-_74%2C_psl_score_100.0%2C_coverage_100.00%25%2C_match_100.00%25
size138408_GeSeqEdit100891	blatN	gene	90501	90572	98.7	+	1	ID=gene-blatn_trnN-GUU_1;Note=blatN_hit_trnN-GUU_NC_036341.1%2C_position_1_-_72%2C_psl_score_98.7%2C_coverage_100.00%25%2C_match_98.61%25
size138408_GeSeqEdit100891	blatN	gene	70307	70378	98.7	-	1	ID=gene-blatn_trnN-GUU_2;Note=blatN_hit_trnN-GUU_NC_036341.1%2C_position_1_-_72%2C_psl_score_98.7%2C_coverage_100.00%25%2C_match_98.61%25
size138408_GeSeqEdit100891	blatX	CDS	57578	58354	.	-	1	ID=cds-blatx_ndhB_2
size138408_GeSeqEdit100891	blatX	CDS	56139	56894	.	-	1	ID=cds-blatx_ndhB_2
size138408_GeSeqEdit100891	blatX	CDS	2577	3353	.	+	1	ID=cds-blatx_ndhB_3
size138408_GeSeqEdit100891	blatX	CDS	4037	4792	.	+	1	ID=cds-blatx_ndhB_3
size138408_GeSeqEdit100891	blatX	intron	3354	4036	.	+	1	ID=blatx_ndhB_3_intron_1;Parent=gene-blatx_ndhB_3
size138408_GeSeqEdit100891	blatN	intron	65047	65845	.	+	1	ID=blatn_trnA-UGC_2_intron_1;Parent=gene-blatn_trnA-UGC_2
size138408_GeSeqEdit100891	blatX	gene	15860	17279	93.4	+	1	ID=gene-blatx_rbcL_1;Note=blatX_hit_rbcL_NC_036341.1%2C_position_1_-_1420%2C_psl_score_93.4%2C_coverage_98.82%25%2C_match_92.21%25
size138408_GeSeqEdit100891	blatN	gene	61841	61912	100.0	+	1	ID=gene-blatn_trnV-GAC_2;Note=blatN_hit_trnV-GAC_NC_036341.1%2C_position_1_-_72%2C_psl_score_100.0%2C_coverage_100.00%25%2C_match_100.00%25
size138408_GeSeqEdit100891	blatX	CDS	23046	24008	.	+	1	ID=cds-blatx_petA_1
size138408_GeSeqEdit100891	blatN	gene	98967	99038	100.0	-	1	ID=gene-blatn_trnV-GAC_1;Note=blatN_hit_trnV-GAC_NC_036341.1%2C_position_1_-_72%2C_psl_score_100.0%2C_coverage_100.00%25%2C_match_100.00%25
size138408_GeSeqEdit100891	blatX	gene	28405	28604	88.0	+	1	ID=gene-blatx_rpl33_1;Note=blatX_hit_rpl33_NC_036341.1%2C_position_2_-_201%2C_psl_score_88.0%2C_coverage_99.50%25%2C_match_87.56%25
size138408_GeSeqEdit100891	blatX	CDS	59754	59987	.	-	0	ID=cds-trsp_rps12_1
size138408_GeSeqEdit100891	blatX	CDS	59197	59221	.	-	0	ID=cds-trsp_rps12_1
size138408_GeSeqEdit100891	blatX	CDS	30581	30694	.	-	0	ID=cds-trsp_rps12_1
size138408_GeSeqEdit100891	blatX	CDS	30581	30694	.	-	0	ID=cds-trsp_rps12_1
size138408_GeSeqEdit100891	blatX	CDS	30581	30694	.	-	0	ID=cds-trsp_rps12_1
size138408_GeSeqEdit100891	blatX	CDS	1710	1734	.	-	0	ID=cds-trsp_rps12_1
size138408_GeSeqEdit100891	blatX	CDS	944	1177	.	-	0	ID=cds-trsp_rps12_1
size138408_GeSeqEdit100891	blatX	gene	56139	58354	97.3	-	1	ID=gene-blatx_ndhB_2;Note=blatX_hit_ndhB_NC_036341.1%2C_position_1_-_1533%2C_psl_score_97.3%2C_coverage_100.00%25%2C_match_98.63%25
size138408_GeSeqEdit100891	blatX	gene	35179	35310	93.2	-	1	ID=gene-blatx_pbf1_2;Note=blatX_hit_pbf1_NC_036341.1%2C_position_1_-_132%2C_psl_score_93.2%2C_coverage_100.00%25%2C_match_93.18%25
size138408_GeSeqEdit100891	blatX	exon	4037	4792	.	+	1	ID=blatx_ndhB_3_exon_2;Parent=gene-blatx_ndhB_3
size138408_GeSeqEdit100891	blatX	gene	23046	24008	91.2	+	1	ID=gene-blatx_petA_1;Note=blatX_hit_petA_NC_036341.1%2C_position_1_-_963%2C_psl_score_91.2%2C_coverage_100.00%25%2C_match_91.17%25
size138408_GeSeqEdit100891	blatX	CDS	15860	17279	.	+	1	ID=cds-blatx_rbcL_1
size138408_GeSeqEdit100891	blatX	exon	2577	3353	.	+	1	ID=blatx_ndhB_3_exon_1;Parent=gene-blatx_ndhB_3
size138408_GeSeqEdit100891	blatX	CDS	38847	39878	.	-	1	ID=cds-blatx_rpoA_1
size138408_GeSeqEdit100891	blatN	tRNA	5401	5481	.	+	1	ID=trna-blatn_trnL-CAA_3
size138408_GeSeqEdit100891	blatX	CDS	35415	35636	.	+	1	ID=cds-blatx_psbH_2
size138408_GeSeqEdit100891	blatX	gene	81494	82024	87.8	+	1	ID=gene-blatx_ndhG_1;Note=blatX_hit_ndhG_NC_036341.1%2C_position_1_-_531%2C_psl_score_87.8%2C_coverage_100.00%25%2C_match_87.76%25
size138408_GeSeqEdit100891	blatN	exon	96919	96955	.	-	1	ID=blatn_trnI-GAU_1_exon_1;Parent=gene-blatn_trnI-GAU_1
size138408_GeSeqEdit100891	blatX	CDS	1793	2260	.	+	1	ID=cds-blatx_rps7_3
size138408_GeSeqEdit100891	blatN	exon	95935	95969	.	-	1	ID=blatn_trnI-GAU_1_exon_2;Parent=gene-blatn_trnI-GAU_1
size138408_GeSeqEdit100891	blatX	CDS	58671	59138	.	-	1	ID=cds-blatx_rps7_2
size138408_GeSeqEdit100891	blatN	gene	12019	12685	71.7	-	1	ID=gene-blatn_trnV-UAC_1;Note=blatN_hit_trnV-UAC_NC_036341.1%2C_position_1_-_74%2C_psl_score_71.7%2C_coverage_100.00%25%2C_match_98.65%25
size138408_GeSeqEdit100891	blatX	CDS	89348	90161	.	-	1	ID=cds-blatx_ycf1-fragment_1
size138408_GeSeqEdit100891	blatX	gene	38847	39878	87.2	-	1	ID=gene-blatx_rpoA_1;Note=blatX_hit_rpoA_NC_036341.1%2C_position_1_-_1020%2C_psl_score_87.2%2C_coverage_101.18%25%2C_match_87.94%25
size138408_GeSeqEdit100891	blatX	CDS	81494	82024	.	+	1	ID=cds-blatx_ndhG_1
size138408_GeSeqEdit100891	blatX	intron	59222	59753	.	-	1	ID=blatx_rps12_2_intron_1
size138408_GeSeqEdit100891	blatX	gene	58671	59138	98.8	-	1	ID=gene-blatx_rps7_2;Note=blatX_hit_rps7_NC_036341.1%2C_position_1_-_468%2C_psl_score_98.8%2C_coverage_100.00%25%2C_match_98.72%25
size138408_GeSeqEdit100891	blatN	tRNA	55450	55530	.	-	1	ID=trna-blatn_trnL-CAA_2
size138408_GeSeqEdit100891	blatX	gene	1793	2260	98.8	+	1	ID=gene-blatx_rps7_3;Note=blatX_hit_rps7_NC_036341.1%2C_position_1_-_468%2C_psl_score_98.8%2C_coverage_100.00%25%2C_match_98.72%25
size138408_GeSeqEdit100891	blatX	gene	35415	35636	93.7	+	1	ID=gene-blatx_psbH_2;Note=blatX_hit_psbH_NC_036341.1%2C_position_1_-_222%2C_psl_score_93.7%2C_coverage_100.00%25%2C_match_93.69%25
size138408_GeSeqEdit100891	blatX	CDS	36590	37235	.	+	1	ID=cds-blatx_petB_1
size138408_GeSeqEdit100891	blatX	CDS	47069	47350	.	-	1	ID=cds-blatx_rpl23_2
size138408_GeSeqEdit100891	blatX	gene	36590	37235	93.9	+	1	ID=gene-blatx_petB_1;Note=blatX_hit_petB_NC_036341.1%2C_position_3_-_648%2C_psl_score_93.9%2C_coverage_99.69%25%2C_match_93.52%25
size138408_GeSeqEdit100891	blatX	gene	6442	10046	96.6	-	1	ID=gene-blatx_ycf2-fragment_1;Note=blatX_hit_ycf2-fragment_NC_036341.1%2C_position_3211_-_6875%2C_psl_score_96.6%2C_coverage_52.27%25%2C_match_50.41%25%2C_fragment_match_94.87%25
size138408_GeSeqEdit100891	blatN	rRNA	92037	94846	.	-	1	ID=rrna-blatn_rrn23_1
size138408_GeSeqEdit100891	blatX	gene	39953	40369	85.9	-	1	ID=gene-blatx_rps11_1;Note=blatX_hit_rps11_NC_036341.1%2C_position_1_-_417%2C_psl_score_85.9%2C_coverage_100.00%25%2C_match_85.85%25
size138408_GeSeqEdit100891	blatN	rRNA	66033	68842	.	+	1	ID=rrna-blatn_rrn23_2
size138408_GeSeqEdit100891	GeSeq	source	1	100891	.	+	1	ID=source-null
size138408_GeSeqEdit100891	blatX	CDS	41092	41496	.	-	1	ID=cds-blatx_rps8_1
size138408_GeSeqEdit100891	blatX	gene	30862	32886	89.0	-	1	ID=gene-blatx_clpP_1;Note=blatX_hit_clpP_NC_036341.1%2C_position_1_-_588%2C_psl_score_89.0%2C_coverage_100.00%25%2C_match_93.03%25
size138408_GeSeqEdit100891	blatX	gene	29410	29754	88.2	-	1	ID=gene-blatx_rpl20_1;Note=blatX_hit_rpl20_NC_036341.1%2C_position_1_-_345%2C_psl_score_88.2%2C_coverage_97.46%25%2C_match_85.88%25
size138408_GeSeqEdit100891	blatX	gene	77041	78222	91.3	+	1	ID=gene-blatx_ndhH_1;Note=blatX_hit_ndhH_NC_036341.1%2C_position_1_-_1176%2C_psl_score_91.3%2C_coverage_100.51%25%2C_match_92.01%25
size138408_GeSeqEdit100891	blatN	gene	47516	47589	100.0	-	1	ID=gene-blatn_trnI-CAU_2;Note=blatN_hit_trnI-CAU_NC_036341.1%2C_position_1_-_74%2C_psl_score_100.0%2C_coverage_100.00%25%2C_match_100.00%25
size138408_GeSeqEdit100891	blatX	CDS	77041	78222	.	+	1	ID=cds-blatx_ndhH_1
size138408_GeSeqEdit100891	blatN	gene	66033	68842	99.5	+	1	ID=gene-blatn_rrn23_2;Note=blatN_hit_rrn23_NC_036341.1%2C_position_1_-_2810%2C_psl_score_99.5%2C_coverage_100.00%25%2C_match_99.43%25
size138408_GeSeqEdit100891	blatX	gene	45280	45498	92.3	-	1	ID=gene-blatx_rps19_2;Note=blatX_hit_rps19_NC_036341.1%2C_position_1_-_219%2C_psl_score_92.3%2C_coverage_96.05%25%2C_match_88.60%25
size138408_GeSeqEdit100891	blatN	gene	92037	94846	99.5	-	1	ID=gene-blatn_rrn23_1;Note=blatN_hit_rrn23_NC_036341.1%2C_position_1_-_2810%2C_psl_score_99.5%2C_coverage_100.00%25%2C_match_99.43%25
size138408_GeSeqEdit100891	blatX	gene	41092	41496	88.9	-	1	ID=gene-blatx_rps8_1;Note=blatX_hit_rps8_NC_036341.1%2C_position_1_-_405%2C_psl_score_88.9%2C_coverage_100.00%25%2C_match_88.89%25
size138408_GeSeqEdit100891	blatX	gene	42227	42629	90.6	-	1	ID=gene-blatx_rpl16_1;Note=blatX_hit_rpl16_NC_036341.1%2C_position_6_-_408%2C_psl_score_90.6%2C_coverage_98.77%25%2C_match_89.46%25
size138408_GeSeqEdit100891	blatX	CDS	44753	45094	.	-	1	ID=cds-blatx_rpl22_1
size138408_GeSeqEdit100891	blatX	CDS	32818	32886	.	-	1	ID=cds-blatx_clpP_1
size138408_GeSeqEdit100891	blatX	CDS	31679	31969	.	-	1	ID=cds-blatx_clpP_1
size138408_GeSeqEdit100891	blatX	CDS	30862	31089	.	-	1	ID=cds-blatx_clpP_1
size138408_GeSeqEdit100891	blatN	tRNA	95833	95870	.	-	1	ID=trna-blatn_trnA-UGC_1
size138408_GeSeqEdit100891	blatN	tRNA	94999	95033	.	-	1	ID=trna-blatn_trnA-UGC_1
size138408_GeSeqEdit100891	blatN	tRNA	65009	65046	.	+	1	ID=trna-blatn_trnA-UGC_2
size138408_GeSeqEdit100891	blatN	tRNA	65846	65880	.	+	1	ID=trna-blatn_trnA-UGC_2
##FASTA
>size138408_GeSeqEdit100891
AATAGAAAATACTAATACTAATATAATAGATAGAATAGAA
AAGAACTGTCTTTTCTTTATACTTTCGCCGGTTCCGTTGC
TACCGCGTGCTTTACGCAATCGATCGGATCATATAGATAT
CCCTTCAACACAACATAGGTCGTCGAAAGGATCTCGGAGA
CCCACCAAAGCACGAAAGCCAGGATCTTTCAGAAAAAGGA
TTCCTATTCGAAGAGTGCATAACCGCATGGATAAGCTCAC
ACTAACCCGTCAATTTGGGATCCAATTCGGGATTTTCCTT
GGGAGGTGTCGGGAAGGAATTGGAATGTAATAATATCGAT
TCATACAGATATAGAAGAATCTCTATTGATTCAAAGGCTG
TACCTATAGGCCTATAGGATAGGGCTAGCGAAAGAGGAAA
AAACCGAAGATTTCACATAGTACTTTTGATCGAAAAATCA
ATCTGATTTATTTCGTACCCTTCGCTCAGTGAGAAAATGG
GTCAGATTCTACAGGATCAAACCTATGGGACTTAAGGAAT
GACGGAAGGGAATAAAAAAGAAATAAATAAAAATGAAGTA
GAAGAGCCCAGATTCCAAATGAACAAATTCAAACTTGAAA
AAAATCTTTCTGATTCTCGAAGAATGAGGGGCAAAGGGAT
TGATCGAGAAAGATCTCTTGTTCTTATTATAAGATCGTGA
TTGGATCCACATATGTTTGGTAAAAAGAAGAATCTTCTCC
TTTGAGAATAATCAAAAAAAGAAAGTGTTCAATTGGAACA
TGAAAACGTGACTAAATTTGTCCTAGTTACTCTTGGGGAC
GGAGTGGATGAAGGGAGGAGCTTCTCGAACGAGGAAAGGG
ATCCAATGACTTCGAAAGAATTGAACGAGGAGCCGTATGA
GGTGAAAATCTCATGTACGGTTCTGTAGAGTGGCAGTAAG
GATGACTTATCTGTCAACTTTTCCACTATTACCCCCAAAA
AACCAAACTCTGCCTTACGTAAAGTTGCCAGAGTACGATT
AACCTCGGGATTTGAAATCACTGCTTATATACCCGGTATT
GGCCATAATTTACAAGAGCATTCTGTAGTCTTAGTAAGAG
GGGGAAGGGTTAAGGATTTACCCGGTGTGAGATATCACAT
TGTTCGAGGAACCCTAGATGCTGTCGGAGTAAAGGATCGT
CAACAAGGGCGTTCTAGTGCGTTGTAGATTCTTATCCAAG
ACTTGTATCATTTGATGATGCCATGTGAATCGCTAGAAAC
ATGTAAAGTGTATGGCTAACCCAATAACGAAAGTTTCGTA
AGGGGACTGGAGCAGGCTACCATGAGACAAAAGATCTTCT
TTACTAAAGAGATTCGGAACTCTTATATGTCCAAGGTCCA
ATATTGGAAGAATTTCAGAGGTTTTCCTTGACTTTGTCCG
TGTCAACAAACAATTCGAAATGCCTCGACTTTTTTAGAGC
AGGTCCGAGTCAAATAGCAATGATTCAAAGCACTTCTTTT
TACACTTTTTCGGAAACCCAAGGACTCCATCGTATGGATA
TGTAAAATACAGGATTTCCAATCCTAGCAGGAAAAGGAGG
GAAACGGATACTCAATTTAAAGTGAGTAAATAGAATTCCA
TACTCAATCTCATAGATACATATAGAATTCTGTGGAAAGC
CGTATTCGATGAAAGTCGTATGTACGGCTTGGAGGGAGGT
CTTTCATATCTTTCGAGATCCACCCTACAATATGGGGTCA
AAAAGCCAAAATAAATGATTTTATTAGCCCTTATAAAAGG
AAAACTGATTCTTGAGAACCCCTTGTACGCTCATGTCACG
TCGAGGTACTGCAGAAGAAAAAACTGCAAAATCCGATCCA
ATTTATCGTAATCGATTAGTTAACATGTTGGTTAACCGTA
TTCTGAAACACGGAAAAAAATCATTGGCTTATCAAATTAT
CTATCGAGCCATGAAAAAGATTCAACAAAAGACAGAAACA
AATCCACTATCTGTTTTACGTCAAGCAATACGTGGAGTAA
CTCCCGATATAGCAGTAAAAGCAAGACGTGTAGGCGGATC
GACTCATCAAGTTCCCATTGAAATAGGATCCACACAAGGA
AAAGCACTTGCCATTCGTTGGTTATTAGGGGCATCCCGAA
AACGTCCGGGCCGAAATATGGCTTTCAAATTAAGTTCCGA
ATTAGTGGATGCTGCCAAAGGGAGTGGCGATGCCATACGC
AAAAAGGAAGAGACTCATAGAATGGCGGAGGCAAATAGAG
CTTTTGCGCATTTTCGTTAATCCATGAACAGGATCTATAT
AGACTCATGGAGCCATACATCTCGATCGGAAAAGAATCAA
TAGAAAAAGAAAGAATCGGAATTGATCGCTATATTTCTCG
AAACAAACGAAAAGGAAACGAAAGATGAAACATAAATCAT
GGATCAATTAAGCCCTCTCGGGGACTTGCTTAAGATAAGA
ATAAAAAAAAGGTAAATACCATGGAATAAGGTTTGATCCT
ATTTATGGGGATTCCGTAAATATTCCATTCCAAAAAAAAA
AAGAGAAAGTTCGAAACAATTGGGATTTTTTGGAGATTGG
ATGCAGTTACTAATTCATGATCTGGCATGTACAGAATGAA
AACTTCATTCTCGATTCTACGAGAATTTTTATGAAAGCCT
TTCATTTGCTTCTCTTCGATGGAAGTTTGATTTTCCCAGA
ATGTATCCTAATTTTTGGCCTAATTCTTCTTCTGATGATC
GATTCAACTTCTGATCAAAAAGATATACCTTGGTTTTATT
TCATCTCTTCAACAAGTTTAGTAATGAGTATAACGGCCCT
ATTGTTCCGATGGAGAGAAGAACCTATGATTAGCTTTTCG
GGAAATTTCCAAACGAACAATTTCAACGAAATATTTCAAT
TTCTTATTTTACTATGTTCAACTCTATGTATTCCTCTATC
CGTAGAGTACATTGAATGTACAGAAATGGCTATAACAGAG
TTTCTCTTATTCGTATTAACAGCTACTCTAGGAGGAATGT
TTTTATGCGGTGCTAACGATTTAATAACTATCTTTGTAGC
TCCAGAATGTTTCAGTTTATGCTCCTACCTATTATCTGGA
TATACCAAGAAAGATGTACGGTCTAATGAGGCTACTATGA
AATATTTACTCATGGGTGGGGCAAGCTCTTCTATTCTGGT
TCATGGTTTCTCTTGGCTATATGGTTCGTCCGGGGGAGAG
ATCGAGCTTCAAGAAATAGTGAATGGTCTTATCAATACAC
AAATGTATAACTCCCCAGGAATTTCAATTGCGCTTATATT
CATCACTGTAGGAATTGGGTTCAAGCTTTCCCTAGCCCCT
TCTCATCAATGGACTCCTGACGTATACGAAGGAGTGCGGT
TCGTTCGAAAAATTCCTACTTCTCTATCTATCTCTGAGAT
GCTTGGATTTTTCAAAACTCCATGGACATGCAGAAGAGAA
ATGCTATCCGCACTCGGACCAAGACATAACTTTTACTTGT
TCAAATAACAATTAAGGTGAAGCAGCGTCAGGAACAACGA
ATCTCTTTATGATAAACAAGATTCATTTTGCAAGTTCGTT
ATTACGGGTAGCTCCTACAAAAGATCGGACTAATGACGTA
TACAATATTTAAATTCTCGATGTAGATGCTACATAGTTGG
TTCTCATCCTTCAGAGACTACGAGTGTAATAGGAGCATCC
GTCGACAAAAGGATCACCCTAAGATGATCATCTCATGGCT
ATTGAGAACGAATCAAATCAGATGGTTCTATTTCTCAATC
TTTTCGACCTCTTGGTTCCGTAGGAGCAAGTCAGAAAGAT
TGAGAAAAATTGGTCATTCACAACCACTGATGAAGGATTC
CTCGAAAAGTTAAGGATTAGTAATCCTTTTTAGAAATCGA
ATGGATTCGGTCTTATACATACGCGAGGAAGGTAATCAAA
AAAGAAAGAAGATGAGTTCTTCTTTCTTTTATCACTTAGG
AGCCGTGCGAGATGAAAGTCTCATGCACGGTTTTGAATGA
GAGAAAGAAGTGAGGAATCCTCTTTTCGACTCTGACTCTC
CCACTCCAGTCGTTGCTTTTCTTTCTGTTACTTCGAAAGT
AGCTGCTTCAGCTTCAGCCACTCGAATTTTCGATATTCCT
TTTTATTTCTCATCAAACGAATGGCATCTTCTTCTGGAAA
TCCTAGCTATTCTGAGCATGATAGTGGGGAATCTCATTGC
TATTACTCAAACAAGCATGAAACGTATGCTTGCATATTCG
TCCATAGGTCAAATCGGATATGTAATTATTGGAATCATTG
TTGGAGACTCAAATGGTGGATATGCAAGCATGATAACTTA
TATCTTCTTCTATATCTCCATGAATCTAGGAACTTTTGCT
TGCATTGTATTATTTGGTCTACGTACCGGAACTGATAACA
TTCGAGATTATGCAGGATTATACACGAAAGATCCTTTTTT
GGCTCTCTCTTTAGCCCTATGTCTCTTATCCCTAGGAGGT
CTTCCTCCACTAGCAGGTTTTTTCGGAAAACTCCATTTAT
TCTGGTGTGGATGGCAGGCAGGCCTATATTTCTTGGTTTC
AATAGGACTCCTTACGAGCGTTGTTTCTATCTACTATTAT
CTAAAAATAATCAAGTTATTAATGACTGGACGAAACCAAG
AAATAACCCCTCACGTGCGAAATTATAGAAGATCCCCTTT
AAGATCAAACAATTCCATCGAATTGAGTATGATTGTATGT
GTAATAGCATCTACTATACCAGGAATATCAATGAACCCGA
TTATTGAAATTGCTCAAGATACCCTTTTTTAGCTTCTAGA
ACCTATTTCTTAGTTCAAGATCCCTCTTACTAACTGGAAT
CAAAGAATTAGTAGATCTGTTCCGCCCAAAATGGGAATGG
GCTAGGGTTATGAACTTATAATCTGATAATCGAGTCGATT
CCATGATTATAAGTTCATTCCATACCGGACCAGACCGGAA
TAGGCTTATATACATTCTCATTATGAGAAGGGGTCATTCG
AGCGTATCTAAATAGATACTATCGTATCTAAATAGATACT
ATGTTTACATATGGATCCCTCCGTCGTTACATTCCATTTA
GGATTAGGAATAGGCGTAATCGGACCTGCTTTTTACATAT
ATATCTCTCCTTATTTGGGACCCTATTCTATTCACCTCTT
TGGGCGTCTATTGAATCGAGAAATGGGTTTGATTGTCCAT
TTTTTTGCTATAATTTTTTGCTATAATATATATATAAGGC
ATGTTCCGGATAATTCAAATCGAAGCAATTGGATGTCCGA
CTCGGGCCTATATGACATGAACGATCAATAGAAATACTCC
AACACTCCACCTTTGTCATATATTCCATACATCACACTAG
ATAGATATCATATTCATGGAATACGATTCACTTTCAAGAT
GCCTTGGTGGTGAAATGGTAGACACGCGAGACTCAAAATC
TCGTGCTAAAGAGCGTGGAGGTTCGAGTCCTCTTCAAGGC
ATAATATTGAGAATGCTCATTGAATTGGAATAAGTTCGGC
AGCGGATCACGAAATCTTGGTGATCTTCTCTATCTAATGA
ATGGGGAGTCCGCTTTGAAATCGTTCGCCCTGCAACCACC
CCCGAGTATATGCTTCAACAGGAATTACACAAGGGTAGAT
TGATACAATAGAAACCTCTGGTAAAATGCCCGCCCGTCAC
CCAACAGATAAAGTACATTACATAGTCCGTTTTAGGGATT
GGCGACTTACCCATTCAGTGACTTTGGCACTGGATGGTCC
CAAAAAAAAATGGGTACTATCGGGTCGGGTGAATTCAATA
ATAGGCGTCTGTTGGCATTCCATCCTTCCTTCTCCTTTCA
GGGACTATCCGAAAGAGAATCCAGTACTTCTTGGTCGTGA
ATATCTGAATAGGACGAACCGCCCCGTGGATATCTTTGCT
TCGGAACAAAACAATTAGAATTAGGCCCGGTCAACTGGAA
TGTGTATTATCCATATAGGGGATCTTCCAATTGAGAAGAT
CCATCGACCTGAGACGAAGAGAAGGGTCTATCTATTTTAT
TTAGTTATTCATTTAGTTATTCAGTTAAACCAATGATTCG
TTATTGGAGCAGATAGCAACAACCACCATTTCATCCGACA
TACGTATTTTTGATTTTCCAATGGATTTACATCTTTCATT
AATGGAAATTTTTTGATGTAGTGAGTAATAGCTCTGGTTG
CTCGCTGTTCAAGAATTCTTGTTTAGGCAGTTCATACCAT
CCATACATAGTGTTTTGATCTAAGATTTCAATTCTTCCAT
GTTTCAGCAGTAACATATTCTTCCATGTCCAAAATATGGA
AGAAAGAGGTGTTTCCACGACTTTACCACCCAGTCAATTC
TGTTCCACTTAATCTCTATTTCATGGCCACATATCTTTCA
GGCTAAGGAATGGGAAACCTTTCTCCTATTACATGAATCC
AATTTCATCCGGGAAAAGCCATCTTTTTCTCAACAATGCC
TTTGTCATTTGATCCAATAGCGTTCCGTTAGATAGGAACA
GATTTGATAAATACTGATAACTCTCGGATAGAGTATTAGA
ACGGAAAAATCCATTAGATAATGAACTATTGGTTCTAAGC
CATTTCTGGCGATGAATCAACAATTCGAAGTGCTTTTCTT
GCGTATTCTTGATAAACCAGCGTTTATATATAGATGTAGG
AGGATTGGTTTGGGAAGTAAGAAGCCCCTTTGACATCTCT
TCATCTGCAAAGAATTCTTGATGTGAAAACACAGAGACAA
AGGGGGGATCTTTGAATAGGAAAAAGAGTGGATCCGCAGG
GTCCCAAATGAATTGGCTTATTCGAAAAAAGCCTTGTTCT
TTGGAAGATCTATCTCCTGTCTGGTACTGCATGGTTCCAC
TCTGCAAGAACTCCGAATCGTTCTCTTGAAGCTCATCCTC
TTCATCATAAATGATCCGCTTGTCCCGAAATGACCTGGCC
CAATAGGGAAATCCCAATTCATTGGACCTTTCGATACAAT
CAAATAGAAAGCCCCAGGGGCGCCATATTCTAGGAGCCCA
AACTATGTGATTGAATAAAACCTCCTCTATCTGTTGTGGA
TCGAGGACTCCTTCTCCTTCCCCTTCTTCAAACTCCGATT
CGTATTTTTCATAGAGAAATCTCTGATCAAGGATAGAACA
AGATCCATTTTGCATCATATCTAAGGGACTCCTTGGTTCG
GGCCGAAGAAGCAATGTCACTCGATCATTATCAAACCGAC
TGCAATCTTTTTCTGTCCGTGAGGATCCCACCAGAGCGCC
TTCTACTTCTAATAGGCCGTGAACTAGATCCGAATCATTT
TCAACAAGTCCATAATAAGTGATCCCATTTTTTTCATCGG
GTCCGGGTAGAGACCAAAGGTCTTGAGCAACCAATCCGGC
AGAACAACTCAAAAGATAAAGAAGTATCGTCAATTTCTTC
ATGCTCGTTCCAAGTTCGAAGTACCATTTGTACAAATAAG
AATCCCCTTCATTACATGATTTCTTCTTCATATAGATAGA
TATAGGATCTACGGGGCAATTACTTAGAAATACATTTTGT
GCAACAGCCCTTCCTATCTGATAGAAAAGGATCCCATGAT
CCTGAACCGATCTTACCTGGGATCGCAAATCCCAAGTTTG
TCTATGAAGAGCAGATCTAATTATATTAGTGTCTATAATT
GATTTCTTCTGTGTAATACTAATTGATAGGGCCTCATTGG
TAAGTGCTACAAGATCTCGTACATTGGAACCCATGGTTAT
GGACCCGAATCCATTAGTATGGAACATTTTCTTTTCCAAG
TGAAATCCCCTAGTATATGAAAGAGTGAAAAAGTGCTTTC
GTTGTTGTGGAATAAGAAGCCTTCGTATCTTAATGCATGT
ATTTAATTTATTCGGAGCTATTAGAGCGGGATCCACTTTT
TGGGGAATATGAGTCGAAGCAATAACAAGAATATCTCTAG
TGGAACATCTTTCACAATCCCTGGAGAGATAGTTCACTAA
TAGACCAAGGGATAAGTAATTCGACTCATTCACATCCAGA
TCATGAATGTTTGGAATCCATATTATGCAAGGAGACATTG
CTTTTGCTAATTCGAATTGAAGGGTGATATAAAATCGGTC
TATTTCCGGCATCATATCCATAGTTAGCGCATTCATCCTA
GTTAGAAGCTCCAGCTCCGTATCAAGGTCACGGTCGAGAT
CGTCACTCACATCAATATCGTCACTATCATCAATAAGAAA
ACCCTTAGGCTTGTTATCCAGGAACTTGTTAAGAAATACT
GTAATGAAAGGAACATAGGAGTTTGTCGCTAGGTATTTGA
CCAAATAGGATCGTCCAGTTCCTATAGAACCTATCACTAA
AATACCCCTAGAGGGGGATAGGGCTAAGCGGAGCGAAAAG
GGTTTTCCATGAGATGGGAAATGAAAACTATTCGCCCCAC
ACGAGGTTTGTGAATAAGTGATTGTCTGATAATGAGCAAG
GAATATCCGTCTTTCGGCTAAACAGGGTGTATTGAACTCA
TAATTCATTAGATACTTTTTATGAATGTCAACTAAGTATC
GTAAGTAAATGGATCCCGGCTCTTCAATCATTTGATAACC
AGAGTCATTCTTTGATAAATGATCACTATGAGTCAGACTC
AATAGAATTTGATCAATCCTTTTTTCTGTCGTTAAGGTGG
AGAACTGAACCAAGAATTCTCTTTCTTTATCATCAATTGA
ATCACTGTTCGCGACCAAGGATTCTATTTTATCATCAATC
CAATCACCGTTCACGTTTTTTCTTTTTCTTATCAATGAAT
AAATCTCTTTACTTGTATGACTTAGATGTCTCGTATTTCT
CGAAAAAGTGATTCGATTGATGGGATTTGGTATGATACTT
ATGAGATCGATGAGATTGATATTCAAAAATTTCTTCTTAG
AACGTATTGATTTGACCCCATAAGCGGGACCACCACCCCA
TAGCATGTTGACGCCAGAAGCAGAACCCCGTATTTCTTCT
AGAAAATCTCCTAATTGTTCCAGAGCAACTAGAAAGAGAT
TCTTTAACCAGAAAGAATTCAGTTCAGATGTAGGATACCT
ATCCAGAAGTTTTCGCAACTCAATCATGTATGATGGAATC
ATCAAAGATTTGACCTTTTCGAACTCTGTCTGTAACTCAC
TAGAGGCTCGGGAAACAAAGAGAAGATGTGTACGAACGAG
ATATCCAGCAACAAGAAGAAGGAAAAGGATTGAATAGAGG
AACTCCCGAACGTTTGGCGATCTCAGATGTGTCGATATCA
ATGGTGACTCATTATTTCGATGAATCATTTCTTCGGACAG
AAGAAGATTATGTAAACACTTACTCGAAATCTCGCTTATC
AGATTCCATTGTGGAAGACACAATTTTTTCTGAAGAATTC
GCCATGATATATCTAATCCATGCATAATATCATGAAAAAT
GGATACAAATTTTTGACTGCTACTTAGTATCGGTAATAGG
TCTGAAAAGGTATCTAAAAATATCAAATTTAGATATTTGT
ACCCTGTCGAAGTAAGGAACCATGGCATATATGTTTGGAA
TAGATTCCATTTTGAGAGAGTTGAAAAAGCACTATCTCGT
TGAAAGGTTCTATACATCTGCCCTTTTTCAACGCATTTCT
TTAGACAAAGACTCCGTTTTTTCCTCTTTTCGGATGGTAA
ATCTTTCTCAGAACATGGAGTGTGAATCAAACCCATGTTT
GAATTGAAATTGAGATACTGATGCAAGTTCTTCCCTTCTG
AATCAGATAGATTCATATCCGAAAGAGGTTGACAATAAGT
TCTTTCAAAATTGACTATTTGTCCCTCTGTTAGAGGTGTT
CCAGAAATGTCTGCGATCGAATAAATAGCTCTACGAACGA
ATGGATCGGATCGAATTGGAAAATGGAAAGATTTGTACAA
GTTATACCTTTCGTCACCACTTCGTGGAAAATCATTAGGT
ATGAATATGTTAGATACCTGTGACTCGATTGGTGAAATAG
TATCTCTCTCCAAAAAAGCATGTTTTTTTTTACCGCCGCA
CAAAGACAAAGAGAATATTTTGTTGCGAATGAACAAGATA
TTGAGGAATTGTCCATACGTAAAATCATAATTCTTGATAC
GGGCCTTTTCCACATAAAAAGGGAATCTTTTGTTACAATA
GAAGCAGAAGTGATGTAGATTATTCAAGAATCGAAGTCGA
TTTGCTTTATAAAAAGAAGATATCAATGAACTTCTATGAA
ATGGTTTTACGGGATTCAGCCAATTGTCTTGATCGTGGGA
TATCATTGAGAAATAGGAATCCGTGTTATCAAAAGATTTC
CTGCGATTATTTCTAGTATGGAATGAGTCAATCATCCACT
TTGGTATCTTATTGAACAAAAATGGTGATATTGTTCCTCC
ATTGATCAAAAATTTCGATTTTTGGGAAGTATCATGATCA
TCCAATAAGAAGGGTTTCCATTTTTTCAAATGAACGATTT
GAAGACCTATTGGTTCTAACAGCTGATTACAGAGTTGATC
ATTCGGACCTTTGCAGTCGGCCAGAAGGTTGTTCCGTAGG
TAATCAGCAATGGTTTCAAGGTCATACACCAACCTCTTAG
ATCTGGCGTCTGGTGATGCTCCAAATTTTTGCTGGGAAAG
GAAGAGGTTGCCTCGAGTTGCAACTTTTGCTGGCGTTTTG
TCTGAGCTGGATGATGAAACATGCAGTAGTGTTGGCTCTG
ATGCTCCTTCATCAGTATCTCAGGAGCGGATTATCATTGT
GGGTAACCAACTTCCCCTTCGGTCCCATCGAAATCCAGAT
GGCAGTGGAGAGTGGTGCTTTAGCTGGGATGAGGACTCAC
TTCTTTTACAACTTAAAGATGGCCTAGGAGAGGATGTTGA
AGTCATCTATGTCGGCTGTCTCAAAGAAGAGATTGACACT
AGTGAGCAAGATGATGTGTCACAAATATTGCTCGAGGCTT
TCAAATGTGTTCCTGCATTTATACCTCCTGACCTTTTCAC
TAAGTTCTACCATGGTTTCTGCAAGCAGCATCTCTGGCCT
TTATTTCACTACATGCTTCCTCTATCACCCGATCTTGGTG
GCCGCTTTGATCGGTCCCTTTGGCAGGCTTATGTTTCTGT
CAACAAAATATTTGCAGACAAAGTAAAGGAAGTAATCAGC
CCTGATGATGATTATGTGTGGGTTCATGACTACCATCTCA
TGGTTTTGCCCCCCTTAAAAAAAAAAAAAAAAAGAATTCC
AAAAATTTTATTTTGAATTTATTAGTAATTTTTATTAGAA
ATTCATTATTCAAAATTGAAGAAATTGAAATTTATTTTTT
AGTCTAGTTTCTATATATTTAATATTTACTTTCTATTTAT
AATGCTATTTATAATGTTTGATTGTATGTTTATAACTAGG
ATTATCAAAGTGAGGAGACTCCTTTCTTTTTGTCTATGTT
TTCACGGTAAGAAAGGACTCCTTTGTTTTGTGCTTTACCG
GGTAAGGTATACCAAGAAAAGCCTATTTGACAATGTTACC
AATGAAAGGTGTCAAAGATCCTCATTTTTCCAACTCGAAC
TTACCAATAAATACAGTAAGTCGTTCCTAAACCCGTGTAA
CTTACTAGTGGATTCGATTTTGATTAGGTTAGATTGGAGC
TTTTTTTTTAACCGTTATGATTTTGGCTCCAAAAATTCAT
TAGGTTTGGGTAGGTATTCCAAAGGCGAAGAAAAGAAGTA
TCACTAACTTTTTGATTGCCGAAAGGAAAGGAGGAAAATT
CATATGTAATTGACCTACAAAGAGTAATGAAAAAAATTTG
GTTTGTTTAGACAAGATTAGAAAAAATACGGATTGGATCT
ATTGAAATGCGCTTTTTTGTTTCATCTTTATGCTCGGCCC
TGAATGATTCCTGTAAGCAGAATGCTTTTTCTTTTTCGAT
GAATCAAGCAAGCACAAGCGGCTAGTTATAAACAACAAAG
AATACAATAATGAAGAACTGAAAACTATAAACTATACAAT
TTTTGTTTTCATTTTTTTTAGGGCTATACGGACTCGAACC
GTAGACCTTCTCGGTAAAACAGGTCAAACTTTTTATTATC
AAAATGATTCGAACTGTTTCAAAGACCCAACATGCATTTT
TTGTTTTTTGCATTGAGCTCTTTCATTAACTGATAGAAAT
AATCGGTTAGTCTACCATAGTTCTCTTGACAGAAAGATAA
GAAGATGGCTCCATGTGCTCTGATTTATTATGGATTCCGA
TCCGAGAGCACTACCAAAGTGTTTCAAAGAAGGGTTATCC
TGACGTAGGTCTGCTTTTGGCTTAGATCAACCTAAGTTAA
ATGGAGTCTCCATCGCCCCGCTTCTGCTTAAAGAATCAAA
TATGAAACTTCATACACCTTAAAGTTCATAGGGATAGGAT
AGGACGAAAAGAGAATTTTTTGAAATCCTTATACTCAGCC
TAGCATTGAATAGACTGGATATTTACCTTATCAATATCTT
AAATCAATAATGGGTTCTCTTGAGTGCTGAAAAGAGCACT
TAAATTAAACCGAATGTTTTGTCAGGCTATTGTTCTCTTG
TTCCCTAAAAGTCATGGAGTAAGACATCAACTTCTGAATA
AGTCTTTTAATTATATGATATACTTCTTTGAAAAACATTG
ACGCGCGTGTAAACGAGGTGCTCTACCTAACTGAGCTATA
GCCCTTGTACTTGTGATACACATTTTATCATGTCGATAAT
TTCTTGTCAAGATAAAGATTACAAGGGCTAACATCCTATT
TCTTTGATCTGCTTGTTTGGTATTGCTTATAAATAATATT
CGATTTATAATCGATAGATGGGACGGGCTACCTTTTTTCT
CTTTATGATGATAAAAGACCTACTTAACTCAGTGGTTAGA
GTATTGCTTTCATACGGCGGGAGTCATTGGTTCAAATCCA
ATAGTAGGTAGAACTTATTAGATAGCAGAATCAATGGTAT
CTAATAAGTTTTGCTACCCACCTTTTCTTTTTATTTGATT
GATTTTTGATCTTTTCCATTCCATTCTATTTCATTTTTGA
ATTGAAAAATTTTTCGTTGTATTAGAATCTGATTTGACTT
ATGATTCCAGTCAATTGGCAGAAAAAAATAGATGTATAAA
CGAAACCTCTGTTTATACAGAAGTTATTTTGATTATTCGG
ACACACCAACAACTAGTTATAGTTACGAAATCAGATTGAT
AGCCTCTACTCGTGCCTTAGCCCGTCTGAGAGCCAGATTG
GCCTCAATTATTTGTCTCTTTCCTTCAGCTTTCCTCAAGT
TTGCTTCGGCTATTTCAAGAGTTTGCTGAGCTTCTTGTGG
ATCAATGTCACTACCCCTCTCCGCATCATTTACTAAAACA
GTAATCTCATTATTGCCTATTCTAGCAAAACCACCCATCA
GAGCCATCGTTAACCATTCGTCGTTAAGGCGTATTCTCAA
AATACCGATATCGACAGCAGTGGCAATAGGCGCGTGATTT
GGTAATACGCCAATTTGTCCACTATTAGTAGATAAAATGA
TTTCTTTAACTTCTGAATCCCAAACAATTCGATTCGGGGT
CAGTACACAAAGATTTAAGGTCATTTCTTCAAGTTGTTCT
CCATTTCTAAATTCGTAGCCTTCGCAGTAGCTTCATCAAT
GTTACCTACCAAATAAAAGGCCTGTTCGGGAAGACTATCT
AATTCTCCGGAAAGGATCAATTTAAAGCCTCTAATTGTTT
CCACTAGACCAACATATTTTCCCGGAGAACCGGTAAATAC
TTCTGCTACAAAAAAGGGTTGTGATAAGAAACGCTCAATT
TTTCGTGCTCTTGCTACAGTTAAGCGATCCTCTTCGGACA
ATTCGTCCAACCCAAGGATAGCTATAATGTCCTGAAGTTC
TTTGTAACGTTGTAAAGTTTGCTTAACTCTTTGCGCAGTT
TCATAATGTTCTTCACCAACGATCTGAGGTTGGAGCATAG
TTGACGTTGAATCTAAAGGATCCACTGCTGGATAGATACC
TTTAGCAGCTAATCCTCTTGATAGTACAGTAGTAGCATCT
AAATGCGCAAATGTAGTGGCAGGAGCAGGGTCAGTCAAAT
CGTCCGCAGGTACATAAACTGCTTGAATAGAGGTTATGGA
CCCTTCTTTGGTCGAAGTAATTCTTTCTTGTAAAGAACCC
ATTTCGGTACTAAGGGTAGGTTGATAACCCACAGCAGAAG
GCATTCTGCCCAATAAGGCGGATACTTCCGATCCCGCTTG
GACGAAACGGAAGATATTGTCGATAAATAGAAGCACGTCT
TGTTCATTAACATCTCGGAAGTATTCCGCCATAGTTAGGG
CAGTCAAACCAACTCTCATACGAGCTCCCGGCGGTTCATT
CATCTGACCATAGACTAGAGCCACTTTTGATTCTGCAATA
TTTTCTTCATTAATTACTCCAGATTCTTTCATTTCCATGT
AAAGATCATTTCCTTCACGAGTACGTTCGCCTACTCCGCC
AAATACGGATACACCCCCGTGAGCTTTCGCAATGTTGTTG
ATTAATTCCATAATTAGTACTGTTTTCCCCACTCCAGCCC
CCCCGAATAGTCCGATTTTTCCTCCACGGCGATAAGGGGC
TAAAAGATCTACTACTTTAATTCCGGTTTCAAAAATAGAT
AATTTTGTATCTAACTGTATAAAGGCAGGCGCAGATCTAT
GAATAGGGGATGTTGTGCGAGTATCTACAGGACCTAAATC
ATCAACGGGTTCTCCAAGCACATTGAAAATTCGTCCTAGA
GTCGCCCCGCCGACTGGAACACTTAGAGGAGCTCCTGTGT
CAATCACTTCTATTCCTCTCATTAGACCATCTGTAGCACT
CATAGCTACAGCGCGAACTCGATTATTTCCTAATAATTGC
TGTACTTCACAAGTCACATTAATTTGTTGACCGGCAGTAT
CTCGACCCTTAACTACCAGCGCGTTGTAAATATTAGGCAT
CTTGCCCGGGGGAAAAGTTACATCTAGCACCGGGCCAATG
ATTTGAGCGATACGCCCCAGGTTCTTTTTTTCAAGCGTGG
AAACTCCAGGGTCAGAAGTAGTAGGATTGATTCTCATAAT
AATATAAAAACATGTCGAAATTTTTTTTTTTCGAAAATTT
TCCAGTCCAAAAGAAATGTTCGATAACAAGTTGATCAATT
AATTCAATAAGAAGTGGGAGTTAGCACTCAATTTCGTTTG
TACCATCTAACGAATCCAATTTAATTGTTTACTTATTTTC
AATTTCAATGAGTTAATTTTCAAGTTCAACTAACTCATTT
TCAAAACAAAATAGAGATATCAAAATATATATATTAAGTG
TATGAATAAAAAGGGCTTCAGGAAGCTTTTCATTTGTCTA
TCACTATAAACAATACTATCTATTTATGGAATTCGAACCT
GAACTCTATTTATGATTCATTATTTCTATCTCATCGGTAC
TTTTTTCTTATTTAAACAGATCTAGTTACGCCTAGTTATT
ATTTTCTTTTTTTCCTAGACGAATTCCGCGGATTTTCACA
TTTACACCTTTTCACATTTAGGATTTACATATACAACATA
TATCACTGTCAAGAGGACATTTTTTTTATTATTTAGATAT
TTTGATTAAAAAAGTTAAGGATTTAGAAACTTGAAAAACA
AGGGTTGCGCCATACATATGAAAGAGTATACAATAATGAT
GTATTTGGTGAATCAAATACCATGATCTAATGTCTAATAA
CGAAATTATGATTAGTTGATAATATTGGTTAATAATTTTG
TGAAAGATTCCTGTGAAAGGGTTCATTCACTCCTAATTCA
TGTCGAGTAGACCTTGTTGCTGTGAGAATTCTTAATTCAT
GAGTTTTAGGGAGGGACTTATGTCACCACAAACAGAGACT
AAAGCAACTGTTGGATTCAAGGCTGGTGTTAAAGATTATA
AATTGACTTATTATACTCCTGACTATGAAACCAAAGATAC
TGATATCTTGGCAGCATTCCGAGTAACTCCTCAACCTGGA
GTTCCGCCCGAGGAAGCAGGGGCTGCGGTAGCTGCTGAAT
CTTCTACTGGTACATGGACGACTGTGTGGACCGATGGACT
TACCAGTCTTGATCGTTATAAAGGACGATGCTACCACATC
GAGCCCGTTGCTGGAGAAGAAAATCAATATATTGCTTATG
TAGCTTACCCTTTAGACCTTTTTGAAGAAGGTTCTGTTAC
TAACATGTTTACTTCCATTGTGGGTAATGTATTTGGGTTC
AAAGCCCTACGCGCTCTACGTCTGGAGGATTTGCGAATCC
CTACTGCTTATACTAAAACTTTCCAAGGACCGCCCCATGG
TATCCAAGTTGAGAGAGATAAATTGAACAAGTATGGTCGT
CCCCTATTGGGCTGTACTATTAAACCAAAATTGGGATTAT
CCGCTAAAAATTACGGTAGAGCTGTTTATGAATGTCTCCG
CGGTGGACTTGATTTTACCAAAGATGATGAGAATGTGAAC
TCCCAACCATTTATGCGTTGGAGAGACCGTTTCGTATTTT
GTGCCGAAGCAATTTATAAAGCACAGGCGGAAACGGGTGA
AATCAAAGGACATTATTTTAATGCTACTGCGGGTACATGC
GAAGAAATGATGAAAAGGGCTGTATTTGCCAGAGAATTGG
GAGTTCCTATCGTAATGCATGACTACTTAACAGGAGGATT
TACTGCAAATACTAGCTTGGCTCATTATTGCCGAGATAAT
GGTTTACTTCTTCACATCCATCGCGCAATGCATGCAGTTA
TTGATAGACAGAAGAATCATGGTATGCACTTTCGTGTACT
AGCTAAGGCGTTACGTATGTCTGGTGGAGATCATGTTCAC
GCTGGTACCGTAGTAGGTAAACTTGAAGGGGAAAGAGACA
TCACTTTGGGCTTTGTTGATTTACTGCGCGATGATTTTAT
TGAAAAAGATCGAAGTCGCGGTATTTATTTCACTCAAGAC
TGGGTCTCTCTACCAGGTGTTCTGCCCGTGGCTTCAGGGG
GTATTCACGTTTGGCATATGCCTGCTCTGACCGAGATCTT
TGGAGATGATTCCGTACTACAATTTGGTGGAGGAACTTTA
GGGCACCCTTGGGGAAATGCGCCCGGTGCCGTAGCTAATC
GAGTAGCTCTAGAAGCATGTGTACAAGCTCGTAATGAGGG
ACGTGATCTTGCTCGTCAGGGTAATGAAATTATACGCGAG
GCCAGCAAATGGAGTCCTGAACTAGCTGCTGCTTGTGAAG
TATGGAAGGAGATTAAATTTGAATTTGAGGCAATGGATAC
AATTTGAGGCAATGGATACTTTGTAATCCACGTTTTTTCT
TTTAATTGAATTCCAATTAAACTCGGCCCAATCTTTTACT
AAAAGGATTGAGCCGAATATAAAGATCCTAATAAAAATAA
AAAGGTCCTATTGTATATATTTTTGTATATATTTTTTATA
TTTTTGATATATTAGATATACAAGACCTTAAATACAAAAA
AAAATAGAAGGCTAAACAACTCAAACCTTTCTATTCTTGT
CTTGGATCCACACTTAATCCTAAGGATCTATAGGATTGAT
GTATTCTTTTATATCTATATCTCGTAGTTTCGGTCAAGGG
TCGATCCAAGTATCACAACTTTGTCTACCCATCCTGTATA
TTGTCCTTTTCGTTCCTTATCCGTATTGGAATAGAAACGT
ATTAATAGGCGAGATTTTACCAAAAATTTTCTTCTTCATA
TTCCTAGGAGAAAAGAAAAAATTATTTTCTCGATGCAAAT
ACGAATTTTACATAACATGACAAATTCCTATTTTATTTTT
ATATTTTGTTAGATATCTATTCTATTTAGATAGTTAGTTT
AGAATTCTGATAATAGAATTCGAATATTTTATTATATTTA
AGATTTCGTTTTTTAGTTTATATTAAAATTGAAATTAAAT
TAATTATTTAATATAAATATTCAATTTAAAATGAAAATTA
AAAAATAATGGAAAGAAAATGGGGTTCCATCATAATCTTA
TTTTTTCCTACCCCTTACCTTATTCAATACCCAGTTAATA
ATCCTAGTGTTTGGATCCATATGCTTATTCTGCTCAGAAA
TGAAATATTCAAATGATTTTTTTTTTCATCGAATGACTAT
TCATCTATTTTTTTTGATATAAATAGTGGCAAGAAAGCTC
TATGGAAAAATGGTGGTTCAATTCGATGCTATCTAACAGG
AAGGTAGAATACAGGTGTAGGCTAAATAAATCAATGGATA
ATATTGGTCCTCTTGAAAATACCAGTATAAGTGAGGACCC
TATTATAAATAAGACAGATAAAATAAATAAGACAGATAAA
AACACCTATAATTGGAGTAATAGTGAGAGTTCTAGTTATT
GTAATGTTGATCATTTAGTTGGCATTAGGGACATTCGGAA
TTTCAGTGCGGATGACACTTTTTTCGTTAGGGATAGTAAT
AGGAACAGTTATTCGATATATATTGATAATCCAATTTTTA
AGATGAACAATGATCGTTCTTTTCTGAGTGAACTAGAAAG
CTCTTTTTATATTTATTGGAATTCTAGTTCTCTGAATAAT
AGGTCTAGGGGTGACGGCCACTATGATCATTATATGTATG
ATACTAAATATAGTTGGAATAATTATATCAATAGTTGCAT
TGACAGTTATCTTCATTCTCAAATCTGTATTGATGGTTCT
ATTTTAAATGATAGTGACAATTACACCGAAAGTTACATTT
ATAGTTCTATTTGTGGTGAAAGTGAAAATAGGAGTGAAAA
CGAGAGTTCCGGTCTAAGAAGAAAAACGAATGGCAGCGAT
TTAACTAGAAAAGAAAGTTCTAATGATCGCGATGTCGCTC
AAAAATACAGGCATTTGTGGATTCAATGTGAAATTTGTTA
TGCATTAAATTATAAAAAAATTTTGAAGTCAAGAATGAAT
ATTTGTGAACAATGTGGATATCATTTGAAAATGAGTAGTT
CAGATAGAATTGAATTTTCGATTGATCCAGGTACTTGGAA
TCCTATGAATGAAGACATGGTATCCCTGGATCCCATTGGA
TTTCATTCGGAGGAGGAACCTTATAAAGATCGTATTGATT
CTTATCAAAGAAAGACAGGATTAACCGAGGCTGTTCAAAC
AGGCACAGGCCAACTAAACGGAATTCCCGTAGCAATTGGG
GTTATGGATTTCCAGTTTATGGGGGGTAGTATGGGATCCG
TAGTAGGCGAGAAAATTACTCGTTTGGTCGAGTATGCTAC
CAATAAATTTTTACCTCTTATTCTAGTGTGTGCTTCCGGA
GGAGCTCGCATGCAAGAGGGAAGTTTGAGCTTGATGCAAA
TGGCTAAAATTTCTTCCGCTTTATATGATTATCAATCGAA
TAAAAAGTTATTTTATGTATCAATCCTTACATCTCCTACA
ACTGGTGGGGTGACCGCTAGTTTTGGTATGTTGGGAGATA
TCATTATTGCTGAACCCAATGCTTACATTGCGTTTGCGGG
TAAAAGAGTAATTGAACAAACATTGAATAAGACAGTACCT
GAAGGTTCCCAAGCGGCTGAATTTTTATTTCATAAAGGCT
TATTTGATCCAATCGTACCACGTAATCTTTTAAAAGGGGT
TCTGAATGAGTTATTTCAGCTCCACGCTTTTTTTCCTTTG
AATTATAAATAAAATAAATAAATAAAGTAAAGTAGAGCTT
AACTTAATTAATTCTAAATTGGTTTAATTATAAATAAGTT
AACTAATTATTTGAGTTCGGCCGAACAAGTATTTATCGAA
ATCAAAGGAAAAACCCGAAGAATGCATTTTTTTTTGTGAC
GGAAGAGTAAATTGTAGAAAGTATCCTGTAGGTCTTTTTT
TTTTTTTTTACCGATATTTCTGATTACTAATACTAATTAG
GCAACCTCTATCGACAAACCAAGAGAAAAGAGTGCATTTT
TTCTTATGCGAAATTGAATTTACAAGGTAAATAATAAATA
AAACCAATTTCATGTTCTTTTCTTACCTCTGTATAGAAAA
TATAGAGTCTTGCATATATGGAGTCTTGCATATTTCTATA
TAGCTGTCGAAAATCCCTCTTTTACTAATATTTTAAATCC
CTATTGTTCGATCGGATTATAAGGCACTTTTTCGGAAATT
TATAAGCGGAAGAAGTTCTTTCTAAAATGAAAGTCAAATT
AAAGTTATAAGACAAGAAAAAGATAATAAAAGAAGAATGA
GAACTAAGTGGGTTATCATACATATAATTTATGTAGAAAA
ATGAAAGAGTCCATTTACCATTTAGTTAGTTCTACACTCC
TTGTACTTTAATTATATATACTCACTTAGATATACTTAAT
CTAATTTTATACAAATTATATTATAATGATTATAAGATAT
CTTTCTAACAAAATAATAAAGCAATAACAGGTAAAAAGAT
TAATAAAAAATAGGTACAAATTTTAAATCGAGGTGCCCAT
TCTATGACAATTCTCAACAACTTACCCTCTATTTTTGTGC
CTTTAGTGGGCTTAGTATTTCCGGCAATTGCAATGGCTTC
TTTATCTCTTCATGTTCAAAAAAACAAGATTGTGTAGATC
CGATGGGACCAAATCTCATCTATTTTTTTTTTTCAAGACT
TAGACTTGGACCATAACACAGATATCTATTTAGTATAATA
TGGTATAATATGCGGCTTCCTTCAAAAAAAAAAACATAAA
TGAAAAAAGGGTTCTTATGCAGGCGTAATAAATAGGCTAT
ATGAGTAAATAAGCTATTTGAAAAAAAAAATCGAGATTGG
GGCGAATGCCTGAAATTGAAATAAAAGCAAAGCTAATGTA
TCTATATGTGTGTAAGTGTAAATAGGGGATTATATGAGGG
GGCTCCTCTTATTTTAGATCTAACAAATTCAATGAATTCC
CCCCTAAGATTTACATCAGAATAGTGCGAGTTGATAAAAG
TTACTTTGGAAACAAAAAAAGTCAAATTCATTTGAGCTAG
TCTCCCACTTCCAATAAAATTAACTGGATCTAGTATGAGT
TGGCGATCAGAACGTATATGGATAGAACTTATAGCGGGAT
CTCGAAAAACAAGTAATTTTTTCTGGGCCTTTATACTTTT
TTTAGGTTCCTTGGGTTTTTTATTGGTTGGAATTTCCAGT
TATCTTGGAAGAAATTTAATATCTTTATTTCCGTATCAGC
AAATCATTTTTTTCCCACAAGGGATGGTGATGTCTTTCTA
TGGCATTGCCGGTCTATTTATTAGCTCTTATTTGTGGTGC
ACAATTTCATGGAATGTAGGTAGTGGCTATGATCTATTTG
ATAGAATAGAAGGAATAGTGTGTATTTTTCGTTGGGGATT
TCCTGGGAAAAATCGTCGCATCTTACTCCGATTCCTTATG
AAAGATATTCAGTCTATCAGAATAGAAGTTAAAGAGGGTA
TTTATGCTCGGCGTGTCCTTTATATGGAAATCAGAGGGCA
GGGGGCCATTCCTTTGACTCGTACTGATGAGAATTTGACT
CCACGAGAAATTGAGCAAAAAGCGGCTGAATTGGCCTATT
TCTTGCGTGTACCAATTGAAGTATTTTGATTAGATACAGA
TAGATCATATCTTGTAAATTATCCCCCCCCCTTTTTTTTT
CAATCGACGTTTCTTTTTATCTGTGCTCCTTAATGAGCGT
TGGACCAGTTCGAATGATAACTTTTCTGTTTTATTTGGCT
TTTACCGCTCATTTTTGATCATCACAATATTCTTTCAGAA
ATCTATCTCACTTATTCCTGTGGAATATCGGCAGTTGACC
AATTTTGTTTTCAAAATATTTTCTATTTTGATACAAAGGA
ATTCGTTCATCTCGAAATCTGAATTGGAAGTGGCTCTTTC
GGGCATTCATCGAAAAGAGGGAATTGCTTCAAATTTGAGC
AATTGAAATATCTGGAAAGAATAGGAATTTTTTGTTTCTT
CATTCGTTTTTCTTAGGCCATTTCTGTATTCTTTCTAAAT
TCAAGAATTACCCACTGATTCACATATAAACAAATAAAAA
AGAACTAGCTTCATAGGTTCGAAAGGGTCCGAAGCCTTGT
AATAGAACTTATGCTTGATAGAAATATTCGATCATATAGA
GTCGACGAATGGGATCGTTTCATTAAAAATTCACAGACAA
CAAAATGAAAAAAAAAACATTTATTCCCCTTCTATATCTT
ATATCTATAACCCTCTTGCCCTGGTGTATCTCTTTTTCAT
TTAATAAAAGTCTGGAATCTTGGATTATTAATTGGTGGAA
TACTAATAAATATGAAACTTTTTTAAATGATATTCACGAA
AAGGGTATTCTAAAAAAATTCATAGAATTAGAGGAACTCT
TACTGTTAGACGAAATGATAAAAGAATACCCCGAAACGCA
TCTACAAAAGTTTCCTATCGCAGTCCACAAAGAAACAATC
CAATTGCTCAAGATGCATAATGAGCAGCGTATCCATACAA
TTTTGCACTTCTCGACAAATATAATCTCTTTCATTATTCT
AAGTGTTTATTCTATTCTAGGTAATGAAGAACTTATTATT
CTTAATTCTTGGGTTCAAGAATTCCTATATAACTTAAGTG
ACACAATAAAAGCTTTTTCTATTCTTTTATTAACCGATTT
ATGTATAGGATTCCATTCACCCCACGGTTGGGAATTAATG
ATTGGCTCTGTCTACAAAGATTTTGGATTTGCTCATAATG
ATCAAATTATATCTGGTCTTGTTTCCACTTTTCCAGTCAT
TATTGATACAATTTTTAAATATTGGATTTTCCATTATTTA
AATCGTGTATCTCCGTCACTAGTAGTGATTTATCATTCAA
TGAATGACTGAAAAACGGTCCACCGATCAAATTAGAATGT
TTGGTATTTTGTACATAAACAAAACATTCAAAATCTTACT
TTTTTTTTTATTTTTATATAGTAATTTTTTCGATACATTC
AAAAGATTCGGATTTTTCTTATATTTTAGAAAAATTTTTC
AGTAAATAGCAGCATCGTGGATAGGGAACTATACTAGTAA
CCTACCTAATTTTATTGTAGAAATTTTCGGGATCAACGTT
GGATCATGCAAACTAGAAGGACCCTTTCTTGGATAAAGGA
AGAGATTACCCGCTCCATTTCCGTATCGCTCATGATATAT
ATAATCACTCAGGCATCCATTTCCAAAGCATATCCCATTT
TTGCACAGCAGGTTTATGAAAATCCACGCGAAGCAACTGG
CCGTATTGTATGCGCCAATTGTCATTTAGCTAATAAGCCC
GTGGATATTGAGGTTCCACAAGCGGTACTTCCTGATACTG
TATTTGAAGCAGTTGTTCGAATTCCTTATGATATGCAACT
GAAACAAGTTCTTGCTAATGGCAAAAAAGGAACTTTAAAT
GTAGGAGCTGTCCTTATTTTACCCGAGGGGTTTGAATTAG
CCCCTCCCGATCGTATTTCGCCAGAGATGAAAGAAAAGAT
AGGTAATCTGTCTTTTCAGACTTATCGCCCCACTAAAAAA
AATATTCTTGTGATTGGTCCTGTTCCTGGTCAGAAATATA
GTGAAATCACCTTTCCTATTCTTTCTCCGAACCCTGCTAC
TAGGAAGAATATTCACTTCTTAAAATATCCCATATACGTA
GGAGGAAACAGGGGAAGGGGGCAGATTTATCCCGACGGGA
GCAAGAGTAATAATACGGTTTATAATGCTACAGCAGCAGG
TATAGTAAGTAAAATTCTACGAAAAGAAAAAGGGGGGTAT
GAGATAACCATAACAGATCCGTCAGAGGGACGTCAAGTGA
TTGATATTATACCTCCAGGACCAGAACTTCTTGTTTCAGA
AGGCGAATCCATCAAACTTGATCAACCATTAACGAGTAAT
CCTAATGTGGGTGGATTTGGTCAGGGGGATGCGGAAATAG
TACTTCAAGACCCATTACGCGTTCAAGGCCTTTTGTTTTT
CTTGGCATCTGTTATTTTAGCACAAATCTTTTTAGTTCTT
AAAAAGAAACAGTTTGAGAAGGTTCAATTGTCCGAAATGA
ATTTCTAGATCTACGGATTTATCACCAGCAAGTTCTTAAA
AAGAACACAATTTTTGTTGGCAATTATGTATGATCAAATT
TTGACAAGCCTTTTTTTTTCTTTTCTTTCTATTTTTTTAT
ACCAGATTTTGGGAATTACTTATACCGCATTTCTAGTCAT
AGTATGGATATTGGTAAAAAGGCTATTTTACTTTATCCCT
TCTTTTGGTCTTTTTTAATCTAAATGGAAGCGGTCTGATT
CTGTTACTATTGTCAGATTTCATAGAATGTATCACTTTTC
TATTCGCATAGAATCCAATTCGACTAGATACTAATTCTTA
GTCGTCGGCACAAGAAAGGGATTTTCTTGTGTCGAAATAA
TAATGATTCTTGATCTCATTTGTCAAAGATCCCTATTCTT
AGTTTCTATCTATTTTTTCCAGGTTTATCATAATATCCCT
TTCGATTTGAATTTTATATGTATAAATTTATTTATTACGT
ATAAAAACGTATAAAAAGTTAAAACCTAGTGGACAAAGAA
AAAAGAAAGGGAAAATTTTTGAGCAAATAGAACTTCGAAC
TTCTAAAAAAATTGAAACTTTGATGAGATACTAAAAAAAA
ATAAAGTAAGGTTCTATTAGTATAGAAAAATTGGCATGCT
ATCGGATCGACCGAAACAAAATATATAACATAAATTAAAT
AGTATGATTATACCATCCAAGGGAAGGAAATCGAGTAATT
ACTTCGTTCTTATAACTTTGAAAGTAGTGATAGATACTAT
CGAGGAACAACTGTTTTGAGTCAATTAATGAAGTTACTTT
TTCAAAAGCACCATCCAGAAAAAATTGGATGGAGTTTTTT
GAAATATTTGAAATATGAGAGAGCTCAACGGGACCCCCGC
CCTTTTTTCTCTCTTTGTTTTGATTGAGGGGGTTCGTTGA
ACTCTTACGCTTTCATGTCTACACTGCAGTTTATCCGATT
ATTACAGGGACGAACCCAATCCGGAATATGAACCATAAAA
GAAAATGCCTATTAAACCAATCACAGGAATACCAGTTACA
GTACCTATTATCCAAAGAGGAATCCTTCCAGTAGTATCGG
CCATTTCTCTCACTTTCCTCCACATTTAATCAAGTGGTCA
TGCTAGAGACCTAAACAGTCATAGATAATTATGAGATGAT
ATCCTTCCGATGGGGTAAGAGAATTTCTACTCTTATTTAT
TATTCTACTATTCTCTTTAGCTTCTATTAATTGAAGAAAT
AATTAGAAAATAAAACAGCAAGTACAAAAATGAGTAATAA
CCCCCAGTAGAGACTGGTACGATTCAATTCAACATTTTGT
TCATTCGGGTTTGATTGTGTCATAGCTCTATAATTAATTC
GAATTAGGTTTATCGTTGGATGAACTGCATTGCCGATATT
GACCCCAAAAAAGAAACGGTAGGTACAGCTAATCCGTGAA
CAGCCAACCATCGTACTGTAAAAATTGGATAGGTTCGATC
TATGGTCATTGGGGCCTCCTAAAAAGATCTACTAAATTCA
TCGAGTTGTTCCAAAGGATCAAAACGGCCAGTTATTAATG
GAATTCCTTGTCGGCTCTCTGTAAAATATTCATTTGGGCG
AGGGCTTCCAAAGACATCGTAAGCTAAACCCGTGCTTACG
AATAACCAACCTGCAATGAATAGGGAAGGTATAGTAATGC
TATGAATGACCCAATATCGAATACTGGTAATAATATCAGC
AAACGAACGTTCTCCTGTGCTTCCAGACATGCTGAGCTCC
ATATATTCTTGTACAGTCAAAGGGGGATCCGTTTTGTAAA
CGATTGGATCAGTAAATGAAAATTTACTGGGATTCCGTCC
TTGTGAGATCGTCAATATTGTACCAAGGGTTTTGTTAAAG
TATACCGAATCAGTATAGCTATCCTTCTTCTGACGCAGCA
ATGCAACTTCAATCAGTATCGAAACGAAGCCCTAGATAAT
TTATTTCTTCTTTTCTTTTTCTTGTCGCTATAGAACCGTG
TATGGAAAATTTGAATTCGACGAGTTGCTTTCTAATCTAA
TAATAATTCATGAATTGGAATCCTTTTTTTTTTCATTTTA
AAGGAATTGGTTAGTCGTCCAGTATCAAGAACCGGCAGTA
GAAAGTATTCGATGAAAGAAGGAGACGAGAACAACGAAAA
AATAATTGTAATAATCAATATTCGTGATGTACGCATTCTT
GTAGTAGATCAAAAAGGCCTTCTTGACATTTAACTACAAA
GAGGGGTTTCCATTTTTTTTTTTTTAATATTCATTTTCTA
TTTTATTTCTCCAGAATTGTCCAACGAATCTCTTGATTCG
GAATCACGTGAGGATAGGTGAATGTTTTAGATGATGAATG
GATTTCTTTTTCTACTTATACCACTCTATTTTTGTTAGTG
CCATCTATAGATAATAATATATAATTATCATGATTGATAA
ATAATTGATAAATTCAAAACTTTCAATTGAACGTATTCAT
TTAATATTGGTATGTATTTTTTTTATTCTTGTATCTTTCA
AAAAATGGAACTTTAGGGAAGTACTTTATAACCATATGAT
ATGTATAAAAAAGTTTATTTAGTTCTTTCATGCCTACTAT
AACTAGTTATTTCGGTTTTCTACTAGCGGCTTTAACTATA
ACCTCAGTTTTATTTATTGGTATGAGTAGGATACGACTTA
TTTGAAATGAATTGAATGAACAATTCATAAAAAAATATTT
TTTTGGACTATTCCATCTCTAGTGTGTCAATTTCCAATTC
TTGGTTATTGAGATTTATGGACAATATGGATTAATATTTA
AGGATAGATATTACCTCTCTTTTCCCTTTAAACAAAAATT
GAAATGATTGAAGTTTTTCTATTTGGAATCGTCTTAGGTC
TAATTCCTATTACTTTAGCTGGATTATTCGTAACTGCATA
TTTACAATACAGACGTGGTGATCAGTTGGACTTTTAATTA
ATTAACATCGTACCTTTTTTGACCTCCTTTTAAATCCGCA
GGAGGTCAAATTAGAGTAGATTGTTGTTCCATTTTTCTGT
ATAATTTTGACTTAACAAAACAGATTCACGCTCTGTAGGA
TTTGAACCTACGACATTAGGTTTTGGAGACCTACGTTCTA
CCGAACTGAACTAAGAGCGCTTTTTTTTATGACAAAGAAT
ATAAGACTGTAAGGAAAAAGATTCTTTTTTTAACTCCAAT
ACATCTTGAATGCATATATTATCCTATTCTATAGCATAAT
CATAATATAGAATAGGATAAAAATGAAAGATTAGGTATGT
CCAATTTTAATTGATCTCAATTGATCCCCCGTTGTTGCTT
AGAGACGAAGTAATAGGTAGGGATGACAGGATTTGAACCC
GTGACATTTTGTACCCAAAACAAACGCGCTACCAAGCTGC
GCTACATCCCTTTCAATTGGTCTACAATGTCATTGTATAG
AATCCATGTATTGTTTTCCACATACTTATTTCATTTTCTT
CATCGATATACACAACTTATCTTGCTATTTCTTCTTTTTG
GTCTCATTAATAATAAACATATGAAAAAAAAGTATATGAA
ACCCGCCTTCGTGAATGTTTGGGTGGAAGCGGACTATTTT
GTTCTTCTTAAGAAAAGGAAGATCTTATCTATCAAATCGT
TGTACATTTCTATTTGAATTAGGGATTCCTACCACATACA
AAACGAATGCAAGTGGCCTTGAATTACATAAACCTTAGAT
CATGTATGTATTATACAATAAACATTTTTTATTACACTAA
AGAAGGAGGATTTAAAATGCGAGATTTCAAAACATATCTA
TCCGCGGCACCGGTAATAAGTACTATATGGTTCGGGTCTT
TAGCAGGTCTATTGATAGAGATCAATCGTTTTTTCCCAGA
TGCGTTGACATTCCCCTTTTTTTCATTCTAGTTATTTACA
CGAGAGGGTGAAAAAAAAAGATTAGAGATAGAATTCAAAA
TTTGTGACTACTCTCCCCTTCCTCTTTTCTCTTTTTTTTT
TAATTCCTTTTTTTTAGGATAAGTTAGAAAAGAGAAAGAA
TAAGTGGATTCAAACTTAGTGAAACTGGGACTTGGGTCTT
GCCTTCAAGTAAATTAACTTTAAGTAAATTTACTTTAATC
AAATTAAGAGAACAGAAGTTAAAATATGGTTAGCGCAACA
GTATCATACAAGATGATTAAATGAAATACTGTCCTGCAAT
TCTAATCTAAACTTCTAATCAAAATAGAGTTTAAAATCAT
TGTATTACTTATTATTTTTTAATATATTGTTTGCAACAAT
AAAATTTCGTGAAATTTTATTTCGAGTTAACAACTTCTAT
TTTTTCCTTCCTTTCTTCTTCGTTTTGGATCAAAAAAAAA
AAAAAGAGAAGAGTTGATTGGATAAAAAATCCAAAGGAGG
TTCATGGCCAAGGGTAAAGATGCCCGAGTAAGGGTTATTT
TGGAATGTACCGGTTGTGTTCGAAACAGTGTTAATAAGAA
ATCAACAGGCATTTCCCGATATATTACTCAAAAGAATCGA
CACAATACGCCTAGCCGATTGGAATTGAGAAAATTTTGTC
CCTATTGTTACAAACATATGATTCACGGGGAAATAAAAAA
ATAAGTGGAACCGATCACCTACGCGTCACCTTTCCAAAGA
AGATGAAAAATAACATTATAAGATATAATATGTTAATACT
TAATATATATTTAATATATATAAATTAAAATAAAAATCCT
ATTTCTTAATTCTAAATCATTATCATTTTTGATCCAATCG
AACGAAATAGGATTTTCGAAATAAGGAAAATAAACAAATC
ATGGATAAATCTAAGCGACTTTTTCTTAAGTCCAAGCGAT
CTTTTCGTAGGCGTTTGCCCCCGATCCAATCGGGGGAGCG
AATTGATTATAGAAACATGAGTTTAATTAGTCGATTTATT
AGTGAACAAGGAAAAATATTATCTAGACGGGTGAATAGAT
TGACTTTAAAACAACAACGATTAATTACTATTGCTATAAA
ACAAGCTCGTATTTTATCTTCGTTACCTTTTCTTAGTAAT
GAAAAACAATTTGAAAAAAGCGAGTTGGTCGTTAAAATGA
CTGGTCTTAGAACCAGAAAAAAATAGGCTTACTCTTCAAT
TGAATCAAAATTATAATCCGAACTCAAACGTAGATTGAAA
GTTTTGTTCGAAAAATTCGAAAACCCAGATTTGATTGTCG
TAAGAAAAAAACGAATTTTGGAAGAAGAAATCTTTTTTTT
TATTGAATATTTTTGTTCAGTTTCACTACTTGATCATATT
ATGATCATATTTGATCATATTTTATCATACTAATTTCTAT
TCTATCCTCTCAGAATTCATTCTCCATCGAATTCCATGTA
AATCATTCCGCGATGGATTCTTTTCAATCTCCTTATTTTT
TGATTTTATAATGTCATTGCAAATCATATAAAGACAATTC
CTATTTAATATGGCTATTTGCGCCAGTATTTTACGATTAA
GAAGCAATTGTTTCTTGTATAGATTTTTTATTAATCTACT
ATAACTATAGGATGCCTTATTCTCACGAATTACTGCATTC
ATCCGAGTAATCCACAAACGACGAAAATCTCTTTTTTGCC
CATCTCTATCCCGATGGGCCGAAAGCAAAGCTCTTATGTT
TTGTTGGATAATAGTTCGAGTAAGTCTTGAATGAGCTCCG
CGAAAGCTTGATGCGAATAAACGAATTTTTGTTCTACGCC
TTCGAGCTATATATCCTCGTCTAATTCTGGTCATTGACTA
AACGAAACTTTGATGAATAACTAATTGATTTCCTTTCTTT
CAGTTATTCTTGTCCCCTTAATAACAAAACGGAATCCTCC
AATGTATAAAATAACAATTCCAACGGCTTTTGCTACTATA
ACCTTCCCAACCACAATTTTTTTCTTTTTTTTCTTCTAGG
CATTGTCGCCTAGAAGAAAAATTGTATTGATACTAAGTAT
TAAATAAAAAAATAGTAAATAAAATAGTAATAGTAAATAA
AATAGTAAATAGAAATAGAAATGGATAAATAAATCATGGG
TTCCGTCGTTTCTATGGTTACTTATTAAACGGTGAGGTCT
TCTCTATACACCGGAGCCCCTTCCTTCATTGATTTTTTTA
ATCAAATAATCAATGTTATTATTAACTTGTACAGTTCACA
CTCTTTGGCTCTACTCATGAATTCGCTAGTAATAGGCCTT
TCACAACGAAATTTATCTATACAGTAACGGTATTTAATTA
TGAAGATTAGCTGATTAGCTGACCTTCTTAGTCCGTTCTT
ACAAGAATAGGGGTATAATTTTTCGGCCTTTTAATTTAAA
TAAGATTTTCCCTGCTTAAGGTATAATCATTTACTACCAA
TAGGGAATTCTTTATCATTTTAAATGAAAATTTGAGGTGA
TTGAATTTCCACCAATAGAAAACATAAATTTAATACACAA
TAACAATAGAAGGGATATAATAGATCTTTTTTTAGATAGT
GAAGGGGTTTTTTCTATCCTATCCATCTGTACTGATCATG
GATAGTGGAAAAAATTGTTTCCTTTCTTTTGTCCTAACCC
ACGATCTGAACGAGTCGCACATACACCCTAGTACATGTTC
CTCGCCGCTGAGGACATCCCCCAAGAGCGGGGGATTTGGT
GACATTTCTGATTGGCTGTCTTGTGTTTCTAATAAGTTGT
TTAATAGTTGGCATATTGAATTGTATGCATAATGGGCTGG
TTTAGATCGATCCTAACCGGAAGATTATGAATTATTTATG
AATTATTTCTAATAATATTAATAGAAGATTATTAGAATAT
TAAACCCGAGTAATAAAATCTCAAATTGTTTGTGCAATTT
GCGTGAAATTACTGTTATTTTTTATGAAACTGCTACAAGA
TCAACAATTCCATGAGCTTGGGCTTCTGTTGCTGACATAA
AAACATCCCTTTCCATGTCTTCGGATACGACCCCTAAGGG
TTTGCCCGTTCTTAATGCATAAACCCGTGTGAGGATTTCG
CGCAGTTTCAGTAGTTCTTCTGCTTCCAGGACAAATTCTC
CTGTTTGTGCCTCATAAAAACCGGAAATAGGTTGATGGAT
CATTACCCTGATGATATAAGATAATAAAAGATTATTCTAT
CCCGAATTAGAAGGTGACGCGAAGAGATAAAGAATAATAA
GAAAAAGGCTAGAATTGAACAACCGTACAGGCATTGTTTG
CGGATTGCATACGGCTTCAGACTGGAATTCACTTTTACCT
TTCGTCGAAGAAAAATATAGAGCTCAGATTGGTAAATGAT
CCAATAACCGCCCTTCCCTTGTGAGTAGTTAAAAAATACT
ACGGTGGCTCCGTTGCTTTATTTCATCGGTAATTTAGCAA
TCCCAAAGTTTCTTTTTTTTTTCGTACTCTTTCATAACTC
ATAAGACAAATAGTATTAAGAGCCCCTCGATGTGAAAACA
AAAAGGTTTGTAACGCTGAAAAAGAACCCCGATGGAAAAG
ATAAAATCGGAAATCCCCTTACTATCTCATACTATTCTTT
CGATATAGAATCGAATATTAAATTACAAAAAAAAAAGAAA
AAAATTTCTTATATCGAATTCGAAATGCCATGCTATTATT
ACTTAATATTCATTCATATTTCATATGGCGAAGGCATAGT
TTTCTTTGTTCTTTCAAATAAAAAACTCATTGGCGCCAAG
CGTGCGGGAATGCTAGACGTTTAGTAATTTTTCCTCCGAC
CAGGATAAAAGATCCCATTGAAGCGGCCAATCCCATACAT
ACTGTCTGTACATCTGGTTGCACAAATTGCATAGTATCAT
AGATAGCTATTCCAGGTATTACCCATCCGCCAGGAGAGTT
TATAAACAAATACAAATCTTTAGTTTCACTCTCCATACTG
AGATATACCATAAGACCAATAAGTTGATTTGAGATCTCGC
TATCAACATCTTGACCTAAAAAAAGTAATCTCTCTCGATA
AAGTCGATTGATTAGGATAAAATTATATCTCTTAGAAACC
GTACATGCATCTTTTGCTGCATACGGTTCAACAAAAGTCG
CGAAAAAAACAATCAATGTGTAGCTTCCAGTTCTCCTGTT
TTTGATAGTGAGTACTTGCTAACTTCTCTTCTAATGAAGA
GGTTGTTCTTCCATTTTTTTTTTCAAGAAAGAGGGGTTTT
GACCCGTTTACCTATATATTTACCTATATATATAATTCAT
TAAATTAAACTTATCAAATTAACTTCTCATTGATGTATTC
TTTCATCGAGATCTAATTCAAATCACGATGACATTTTCTT
GTTCCTGAATGGGTTTCTTTAATTCTTCTTTAGGTTTGTG
CTCTACTCCGTGTAAAGATCTGTCCGAATTTGGATTTGCC
CGTATAGGGCAAATGCCCCCAAGACTCCGTCTTTTTGGTA
CAACTTCTTTTTTTTTAATTCATAGGACGGTTTCTGCCAC
AAATATTTGACGTATTCGGCATATTATTCGATTGATTATG
AGTAGCGATTGGAAACTACTCCTATTTCTATTTTCCTATT
TCTAATTTCTATTTTCCTATTTCTATTTATAAATAAATAA
GTAGTAATGATAGATATATTAGTAATTGGTTTTTTATAAA
CGGAGCCTGGATACTTCATTTTTTTGGCCAACTAAGCTAA
CCATAAATTATTCTAATTGATAATATTAATCTGGATACCC
CCAAAACATAGATGAACTTCACGCTCCAAATTTTTTATAA
TTAAATAAATCTTTCTTGGGTGAAACAGAGGATCTCTCGA
TCGGGGGAGAGAACGGGAAAATCCCGTATGACCCAATATA
TCTGACAAGGCGCACTATACGTCAATCCAAATTGAATCGT
CTTCCCCAGGATTTCTAAAAGGCACTTTTGGAACACCAAT
AGGCATGAAATGAAAGCAAAAAATAAGTACTATATTTCAC
TTTGATGTGAAAGCGTAAGAATGAATTTATTGTCTTAATA
ATATTGGCCTTTATCATATGTTATGCGTGGATTCGGTAAG
TTCATAAAAATAAAGGAAGACAAAGTAATAAAGTAAAATT
CTTACTAATAGCTCCCTTGAATAATGAACAAATCTGTATG
CAGTCGTTCATAGAAAATGGGGTCAATCCCCCATTGCGTA
TTGGTGCTTATCGGGTATAGAATAGATCTGCTTCTCCGTA
TTTCTCCAAACAGAATTGTTACATTGTTTGTTATTAAAAG
AATAGAAAAAATAATAATCCTTTCTCAGAGATAATCCAAT
GAAAAAGGGGGGGGGTCCATAACATAGTTTTTTTTCCAGT
GCAATAAAGTTACATAGTGTCTATTTTTCGTTGATAAAGG
GGTATTTCTATGGGTTTGCCTTGGTATCGTGTTCATACTG
TCGTATTGAATGATCCCGGTCGTTTGCTGTCTGTCCATAT
AATGCATACAGCTTTGGTTGCTGGTTGGGCCGGTTCGATG
GCTCTATATGAATTAGCCGTTTTTGATCCCTCTGACCCTG
TTCTTGATCCAATGTGGAGACAGGGTATGTTCGTTATACC
CTTCATGACTCGTTTAGGAATAACCAATTCATGGGGTGGT
TGGAGTATCACAGGAGGAACTATAACAAATCCGGGTATTT
GGAGTTATGAAGGTGTGGCTGGGGCGCATATTGTCTTTTC
GGGCTTGTGCTTCTTGGCAGCTATCTGGCATTGGGTATAT
TGGGATCTAGAAATCTTTTGTGATGAACGTACCGGAAAAC
CCTCTTTGGATTTGCCCAAGATCTTTGGAATTCATTTATT
TCTATCAGGGGTGGCTTGTTTTGGGTTTGGCGCTTTTCAT
GTAACCGGATTGTATGGTCCTGGAATATGGGTGTCTGATC
CTTACGGACTAACCGGAAAAGTACAATCTGTAAATCCAGC
GTGGGGTGTGGAGGGTTTTGATCCTTTTGTTCCGGGAGGA
ATAGCCTCTCATCATATTGCAGCGGGGACGTTGGGCATAT
TAGCGGGCCTATTTCATCTTAGTGTCCGTCCGCCTCAACG
TCTATACAAAGGATTACGTATGGGAAATATTGAAACCGTC
CTTTCCAGCAGTATCGCTGCTGTCTTTTTTGCAGCTTTTG
TTGTTGCTGGAACCATGTGGTATGGTTCAGCCACTACCCC
CATTGAATTATTTGGTCCGACTCGTTATCAATGGGATCAA
GGATACTTCCAGCAAGAAATATATCGAAGAGTTGGCGCTG
GGCTAGCCGAAAATCAAAGTTTATCCGAAGCTTGGTCTAA
AATTCCTGAAAAATTGGCTTTTTATGATTACATCGGTAAT
AATCCGGCAAAAGGTGGATTGTTCAGAGCAGGAGCAATGG
ACAACGGGGATGGAATAGCTGTTGGGTGGTTAGGTCATCC
TATCTTTAGAGATAAAGAAGGGCGTGAACTTTTTGTACGT
CGTATGCCTACTTTTTTTGAAACATTTCCAGTTGTTTTGG
TAGACGGAGACGGAATTGTTAGAGCCGATGTTCCTTTTAG
AAGGGCAGAATCGAAGTATAGTGTCGAACAAGTAGGTGTA
ACTGTTGAGTTTTATGGTGGCGAACTTAATGGAGTTACTT
ATAGTGACCCTGCTACTGTGAAAAAATATGCTAGACGTGC
TCAATTGGGTGAAATTTTTGAATTAGATCGTTCTACTTTG
AAATCGGATGGTGTTTTTCGTAGTAGTCCAAGGGGTTGGT
TTACTTTTGGACATGCTTCGTTTGCTCTTCTCTTCTTCTT
TGGACACATTTGGCATGGTGCTCGTACCTTGTTCAGAGAT
GTTTTTGCCGGCATTGATCCAGATTTAGACGCTCAAGTGG
AATTTGGAGCATTCCAAAAATTGGGAGATCCAACTACAAG
AAGACAAGTAGTCTGAATTTTATTTTTGTAATTTGACATT
TGACATGGGGTACTGGAAACATCTTGATTTGAATAGTCGT
CTTTTCCTTGAATCTTGCTCTTTTTTTATCCGGGGGAGGA
TCCCTAATAAACAGATATGGAAGTTATAATTGTAAACCGC
GATCGAATCTATGGAAGCATTGGTTTATACATTCCTCTTA
GTCTCGACTCTAGGAATAATTTTTTTCGCTATCTTTTTTC
GAGAACCGCCTAAAGTTCCAACTAAAAAGATGAAATGATT
TTTTATTATCTTAGTTGAAGTAAAGAGCCTCCCAATATTG
GGAGGCTCTTTACTTCAACTAGTCCCCATGTTCCTCGAAT
GGATCTCTTAATTGTTGAGAGGGTTGCCCAAAAGCAGTAT
ATAAGGCGTACCCGGTAAAACTTACAAGTAAACCAGATAT
AGAGATAGCGACCAGGGTTGCTGTTTCCATTATTATAGAA
TTTCAAGACCATAATGGGTCTATGATAAGATGATTTATTT
ACAACGGAATGGTATACAAAGTCAACAGATCTCAATTAAT
ACAAAATAGGATTTATGGCTACACAAAATGTTGAGAGTAG
TTCTAGATCTGGTCCAAGACGAACTATTGTAGGGGATTTA
TTGAAACCATTGAATTCGGAATATGGTAAAGTAGCTCCTG
GATGGGGAACTACTCCTTTGATGGGTATCGCAATGGCTCT
ATTTGCGGTATTCCTATCTATTATTTTAGAGATTTATAAT
TCTTCCGTTTTACTAGATGGAATTTCAATGAATTAGATGT
ACAAGGACCGCTAAGTCCTAACTTTTCAATACAAAGTGAA
GCGTTTTGGTCTGAGATTTTTTTTAGTCCATTCTATTCTA
TTTTGGTAGTTCGATCGTGGAATTTCTCTTTCTTTCTGTA
TTTTTGGAATATGAGTGTGCGACTTGTTATAATGGATCCT
ATTGATAGTACAGAGAATGGACCTGTCATCTTGATATAGA
TTGTTTTTTACCTCGTCAGATATTTATTCTAGTATCTGAA
GCACGGAATATATGAAATCGATTACGAAGTTTTAGAACTA
TGATTCATACTTAATGTTCAGATCTTGCGACCCGACTCAA
AAAAAAATTTCAATTCAAAGAGTTAGTTTCAACTCAAAGA
GCTAGAAGGTATAAATTCAAAGATTTTTCTTCTTTCAAAC
GCTTTATCTATGCTTTTTTGATCAAAGGGCAAACCCTTCT
GTGGATTTTTAGTTACTACATTTCTTCAACGCATTGAATA
AGTGATGATACAACGATTCTTACTCAGGGAATCTTAGGTT
TATAGTTTGAAGGGTTTATTGAATCATCGTGGGTCTAGCA
TGAATCTGAGGTTTCTTTCTATCGAGTTTAGGATCTTAAC
AAGAAAATTCCTATCAATAATAAAGACAACAACAGTAAGG
CTGCATTACATACAAATCAAAATACCAAAAAAATAGAGAA
TATAGAAAATTCAAGAGGCCTGTAAAGAGCAACACTAAGA
GATCAAAGAGCCGACTTGAAATTTTGGCATTATAACCACA
AGAAAGAGTTGCCGGATTAGTGTTTTTTCGTATCGTAATC
TTCAGCGAAGATTGTTGAATCATAGAATTAAGAAGTTTTT
ATTACACATATCCGTTTCAACTAATATTTTGGTGTTTCTG
TTTGAGCTGTACGAGATGAAATTCTCATATACGGTTCTCA
GAGGGGGAGTCTTCCCGGTTTACCTATCTCAATAAAGTCT
ATGATTGGTTCGAAGAACGCCTCGAGATTCAGGCGATTGC
AGATGATATAACTAGTAAATACGTTCCCCCTCATGTCAAC
ATATTTTATTGTTTAGGAGGAATTACGCTTACTTGTTTTT
TAGTACAAGTAGCTACGGGGTTTGCTATGACTTTTTACTA
TCGTCCGACCGTTACTGAGGCTTTTGCTTCTGTTCAATAC
ATAATGACTGAAGCTAACTTTGGTTGGTTAATTCGATCAG
TTCATCGATGGTCGGCAAGTATGATGGTCCTAACGATGAT
CCTGCACGTATTTCGTGTGTATCTCACCGGTGGCTTTAAA
AAACCTCGTGAATTGACTTGGATTACAGGTGTGGTTCTTG
CTGTATTGACCGCATCTTTTGGCGTAACTGGGTATTCTTT
ACCTTGGGACCAAATAGGTTATTGGGCAGTCAAAATTGTA
ACAGGTGTTCCGGAAGCTATTCCTGTAATCGGATCGCCTT
TGGTGGAGTTATTACGTGGAAGTGCTAGTGTAGGACAATC
TACTTTGACTCGTTTTTATAGTTTACATACGTTTGTATTA
CCTCTTCTTACTTCCGTATTTATGTTAATGCACTTTTCAA
TGATACGTAAGCAAGGCATTTCTGGTCCTTTATAGAGAAT
ATAGATCATAGATAGTTGTAATCAATCATTACATTAATCG
TTTGGGGGAGGAAGATATAGTATTTCATTGCTATAAATAT
GGATTATTAAAAAAAAAAAAAATAAGCCATGTATTTGGAT
ATTTTCCTTCAACTCCAAAAAAAAATTGAATTTCTTTTTT
TTTTTTTTATTTTATTTGACATGAATAGTTGAAGCGAATT
CTCCTAAGATAAAAATGGATTATGGGAGTGTGTGACTTGG
ACTATTGATTTAGCCGTGCAGATATATGCCCTTATCCGCC
ACATTGGAATTCACAATCAAATGTGTCTTTGTTCCAACAA
CTGCGAAAGCCCCATACAATACAGAGGGTAGGCTGGTTCG
CTCGAAGAGAATCTTTTCTATGATCAAACCCCAATCATGT
TGTGCATGAAGAGGCTCCGTAAAATCCAGTCGAATAAGTG
ATGTGGTAGAATCCATATTCTATTTTAGCTATTTTACCTA
ATATTTAGTTTTACAGATTTCATTTACTTATTTTAATAGT
ATGGAAATGCAGCCATTTCCTTTGCATCGACTCGATTTAC
GATACTATCGGAGTGAAAGAAGGGATCTACAGAATGCCAG
AGGCTAAACTATATTAGTAACAAGTAAATCCTTTGTATGT
AAAAAGTCTCGATATTTTTTGGAGATGGAGATAAGTCAAT
CGAAAGGTCTGAGACGGCCCAAAAAGCGGATCACCTTTGT
AGGCATACTTGGGTATTGAGCATTTACCTGTAAGAACCGA
ATTCCTTGCAATGGATGATTGCAACTCTGGAAAAAGGAAT
CTAGTCAACTTTTTATTACATAAAATTATTACATAAAATC
ATTCATCTATGTGTAGATATGGATAACATATAGATTTTAT
AACATCTAGACATATATATTTTTATAGGGATGCTTTTGGC
TCGTTTGATTATTGCTCGAGCTGGATGATGAAAAATTATC
ATGTCCGGTTCTTTCGGAGGATGGATCTATGAATTCACCT
ATCCCAATAACAAAAAAACCTGACTTGAATGATCCTGTAT
TACGAGCTAAATTGGCTAAAGGAATGGGTCATAATTATTA
CGGAGAACCCGCATGGCCCAACGATCTTCTATATATTTTT
CCAGTAGTAATCTTAGGTACTATTGCATGTAATGTAGGAT
TAGCGGTTCTAGAACCATCAATGATTGGTGAACCTGCAGA
TCCATTTGCAACTCCTTTGGAAATATTACCTGAATGGTAT
TTCTTTCCCGTATTTCAAATACTTCGTACAGTACCAAATA
AGTTATTGGGTGTTCTTTTAATGATTTCAGTACCTGCGGG
ATTATTAACAGTACCCTTTTTGGAGAATGTTAATAAATTC
CAAAATCCATTTCGTCGCCCAGTCGCGACAACCGTCTTTT
TGATTGGTACTGTAATGGCCCTTTGGCTAGGTATTGGAGC
AACATTACCTATTGATAAATCTTTAACTTTAGGTCTTTTT
TAAATTGATTCAATTATAAAATATCACGACATGCGTATCT
AGGGAATAGTCACTTCAAAGTGAATTTTCCCTAGATAAAC
AAGCTATTCAATGTTAAAAAAAAAGGCGCAAATAAATCCA
TTGGATTTAAAATGGATTCTTTGGTAAATCAATTGCGAAA
TGCTTTTCTCTTTCTAAAATGTCTAATATATGTTTTACGT
CGTTTATGCGAAAATATTCAATTTTCATAAGATCTTCGTG
GCTCTTATTCAAAAGGTCCAATAATGTATGTATATTGGAC
CTTTTCAGGGAATTATAGATCTTCGGAGTCAATTCTAATT
GGTCAATAAAAATATATTTCAATGCGAGTTCTTCTTTATT
TTTTCTTAGTTTAAGTTTAGCCAATCTATCATGAAAAGTA
AAAAGAGGTAAAGTAACCTTGTGCTGATTTTTTTCTAAAT
GCGCGTTTTCTTCTTCTGCATGTAGAAAAAGAATAAATAA
ATCAATCAAAGTTCGAGAGGCTTCATGAAGTGCTTCTTTA
GGAGTTAAACTTCCATTTGTCCATATTTCCAGAAAAAGTA
TCTCTTGCTTTTCATTCCCGTTTCCATAAGAATGAACACT
ATGATTTGCATTTTTAACAGGCATGAATACAGCATCTAGA
GGGTAACTTTCATCTTGAAAATTATTTGGCGGTTTTAGAC
GATAACCGCGACTCCTCTCGATTTGTAATTCAATACGCAA
ATCAATAGGTTCGGTTAGCTTAGCTATATGCTGTTTATTA
TCAATGATTTCCACAGCAGGTGGTAGGATGATGTCTTGAG
CAGTTACATACCCAGGGCCTTTGACACAAATAGATGCGTT
ACGAGTTCCATACAAATTACTTCTCAATACAATTTCTTTT
AAATTCATTAAAATTTCATGTACTGATTCTTGAATACCTG
CTATAGTAGAAAATTCGTGTGCTATTTTTTGAGATTTTAA
TTTTGCACATGTGATACATGTTCCTTCTATTTCTCCAAGC
AAAGCTCTTCGCATCGCAATGCCTATTGTGTCGGCTTGAC
CTTTCATAAGTGGAGACAGAATAAAACGTCCATAATAAAG
ACGCTTACTGGTGGCTCTTGATTCAACACACTTCCACTGT
AGTGTCCGAGTAGATATTGTTACTTTCTCTCGAACCATAA
TAATCTTATTATTTTTTTTTTATCAAATGATTGAATTATT
TATTTCTCTTGAAATCTCTTCAATGTTTATTTTTACACGC
GTCTTTTTTTCGGGGCTCTGCAGCCATTATGTGGCATAGG
AGTTACATCCCGGACGAAACTTAATAGTATACCACTTCTG
CGAATAGCTCTTAATGCTGCATCTCTTCCGAGACCAGGAC
CTTTTATCATAACTTCTGCTCGTTGCATACCTTGATCCAC
TACTGTTCGAATAGCAATTCCTGCTGCAGTTTGAGCAGCA
AATGGGGTCCCCCTTCTTGTGCCTCTGAACCCACAAGTAC
CAGCGGAGGACCAAGAGATTACTCGACCCCGGACATCCGT
AACGGTCACAATAGTATTGTTGAAACTTGCTTGAACATGG
ATAACTCCTTTTGGTATTTTACGCGCATTCCTACGTGAAG
CACTGCGTCCATTCCTGCGTAAACCAATTCTCGGTAAAGG
TTTTGGCATATTTTATCATCTTATAAATAGAAGTCATAGG
TTTATGGATATATCCATTTTGTGTCAAAATAGATCTTTTT
ATTTTTATTTGTACATTGGATCCTTTAGGGAGTTCCCGGT
TACAAAGATTATCCTTGTCTTTGTTTATGTCTGGGATTGG
AGCAAATTACTATAATTCGTCCCCGTCTCCGTATCAGTCG
ACATTTTTCACAAATTTTACGAACAGAAGCCCTTATTTTC
ATATTTGTCATTCCTTAATTTTATTAATTTTAAATATACA
TACTTTTTTTTTTGAAGAAAATAAGTTTCTTTCAATTTTG
AAATCTTGAATTGTATCCCTATGAAAATGAAAGGAATTTT
GAAGTTCAAAAAAACTATCTAATCATTTGAATCTTTCTCG
CGGAGTCTGTAAATTAGATACCGTCTGGTTGAAACAGAAT
TACTTACTTCCATTTTGACCCTATCCCCCAGTAATATATG
TATAAAACCACGTCGGGTCTTTCTCGCAACATAACCTAAA
ATTGGGTCTTTATTATCTAAATGAATCTGGGAACATACCA
TTAGAAAGTGATTCATTAATTTAACCTTCCCGAATCCTCT
TTTGTTCTTTCATTCCATCTAAACGCCTCTTGAAGTATCA
ACTAATGTAGGAGGAATGTTATTATAAACCTGTTCCTTCC
CCCCCCCTTTTTTTTTCACAAATAGAAAGCCCAGATACAA
TTTTGAAAAGATTACCATATATAACACAAGATTTCTCCAC
CGATTCTTTCTAGTCGAGCTTCTCGGTCTGTCATTATACC
CCGAGAAGTAGAAAGAATTACAACCCCCATCCCACCCAAA
ATTTTAGGAATTTGCTGATAGTTAGAATAGATTCGTAAAC
CGGGTCGACTGATCCGTTTTAAATTTAGACTTGTTTTATA
TGGTCCTTTTCTATTCCTTCTATGCCGTAGAGTTAAAACC
AAAAAATTTTTGTTGCCTTCCCGGTGTTTCCTCGCGTTTT
CAATAAAACCCTCTCGTAAAAGTATTTTAATAATGTGTTC
CGTGGTGTTAGTAGATCTTATTCGAACGCTTCCTTTTCTA
TCCATGTCAGCATTTCGTATAGAGGTTATTATGTCAGCAA
TAGTGTCCCTGCCCATGATAAACTAAAATTATTGTTGCTC
CCTAATTTGGATATAATTAACATATTCATTTTTTTTTTTT
TTTTCTTTTTTTTATGTTTTATGAAAGAATTTTATTTTTA
TTAAAGGTATATGCGTGAAATACAATCTATTAATTAATTT
GAATTAAATCCAGTTCATTCAACTATTATAACTATATCAC
GGTCTAATCTTAAATGTTATCTTTCGTCTTATATTTTATA
TTATATGTTTTATCTTATAATACTTCAGGGGCTAATGAAA
CTATTTTAGTAAAATTTAACTGTCTCAATTCTCGGGCAAT
CGCACCAAAAATGCGAGTTCCTTTTGGATTTCCTTCTTGA
TCAATGACAACTGCAGCATTGTCATCATATCGTATTATCA
TACCGTTGTCTCGTTTGAGTTCTTTACAGGTACGTACAAT
TACAGCTCTAATTACTTCTGATTTTTCTAGAGGTGAATTT
GGTACTGCTTCTTTGATCACAGCAACAATAACGTCACCGA
TATGAGCATATCGGCGATTACTAGTCCCTAGGATTCGAAT
GCACATCAATTCTCGGGCTCCGCTGTTATCTGCTACATTC
AAATGGGTCTGAGATTGGATCATATCATTTTGTTATTTCA
ATGCAAAGGAAAAAAAAAAAGAAATATTATTTGTTAAAAA
AAAAAAAAGAAACTTGCAATTTTTTTCATCTCCAAGACCT
TTGTATTTTAGTTTCATTCTATATTCCTATCCCGAAATAA
TGAATTGAGTTCGTATAGGCATTTTTGACGCTGCTATTGA
AATAGCCTTTCTGGCTATATTTTCTGCTACTCCGCTCATT
TCATAAAGTATTCTTCCTGGTTTAACAACAGCTACCCAAT
ATTCGGGAGATCCTTTCCCCGAACCCATACGTGTTTCCGT
GGGTCTTACGGTAATAGGTTTGTCGGGAAAAATACGTACC
CATATTTTTCCACCGCGGCGCGCATTTCGTGTCATTGCCC
GACGCCCTGCTTCTATTTGTCGAGATGTAATCCAAGCGGG
TTCAAGTGCTTGAAGAGCATATCTACCGAAAGAAATACGA
TTACCTCGATAAGATATTCCTTTCATCCTTCCTCTATGTT
GTTTACGGAATCTGGTTCTTTTGGGGTTATAGTTGATGGT
TGTTTCTCAATTCCATCTCTACTGCAAAACTGGACATGAG
AGTTTCTTCTCATCCAGCTCCTCGCGAATGAAATGATTAA
AAAAATATACATTTTAAAAATATACATAGAGTTGATGAAT
AGTATACTGAATGGTGGGATCCTTTCAGATTTCATCTAAA
TTATTTATTGTTAATTTATTTATTTTTATTGGAAATTTGT
ATATTTTATTTTTAGTTTTATTTAGTTTTTTAACTAAAAC
TAAATAACTGAAGTATAAACTTTTTGTTTTTTTTTTGTAT
TCTTATTTAATATATTTAGTCTATTTATTTAATATTATTT
ATAATATTATTGAGTATATTTATTTAGTATATTTATTATG
ATATCAAAATGATATCAGAGATATCAAAATGATATCAGAT
CGTTTAACAATAACATAAAAAGCTTCGCGGGCGAATATTT
ACTCTTTCACTGTTTCCTTCATTTATCATTTATAAGGTTA
ACCCATTAATTCTCAGAATAAATGGATTGTTCCCTGGTGC
ATTTCGCCATCCCCTCTAATGAATCATTAAGATTCATTTT
CAATTTTCAATAGGATCTTATGTATTCACAGGTTCCGTCG
TTCCCATCACTTCTCGATTACTGGTTAGGTCTTAATTGTA
CAATGGAGCCCTAATGAAAATTCTTCTTGAGTCAATTTTC
TCAGTCTTTCTTGACTTGAGGCTCTTGATTTTTTTTCTAT
GAATATGAACAGATTCATTTAATTATAGATCAATCGGTAA
TGATGCTTTATTACATTGGCTTTTATATGAGATGACTCAT
AGACCTTACATATTGGTATTGGAATTTTATATCATTGATA
TTTTTTTTCTCTCTTTCTCTCACCTTTCCATTTATCTGCA
AAATTGGAATTTTGCTTTCCAATTAATAATCTAATTCATT
TAGCTTTTCTTTATGTAAAAATAAGATTTAAGTTGCTACA
ATGATATGATTAATATATCATATCTTGCTTCTTTTATTTG
GATCTAGATAATGCGAAGCGATGAGTTGGTTATTCGTTCT
ATACTTATTAGTTCATAATTAGGGGTCAGTCCATTTTTTT
TAATCCTTACCTTAAAAAAAACCAAGGAGTCGCACACAAC
GAGTCGCACACTAAGCATAGCAATTATATCAAATTCTTAA
TCTAATTTTTTATTTTATTCAACCCTATAGAATTAGAATA
TAGAATTAGAATTGCTTTTTTTTGTTCAATCAAAACAAAA
AAAAAAAAAAAAATGAAAGAGGTTGTCATTTTTTGTTCTT
TCAATGGATCGAACATAAAGACAAGTTAAGTAAGGGTCTA
CTATTCCTCGTTTCCAAATGTCCAAATTTTTATGCCTAAT
ACCCCATAAATCGTTATAACTTTATAGGAACAATACTCAA
TTTTAGCTCGAATGGTTTGGAGAGGAACCCTACCTTCTCT
AATCCATTCAACGCGTGCAATTTCTTTTCCGTCAAGACGC
CCCGCAATTTGTATTTGAATTCCTTTTGTATCAGCCTGTT
CGGTCAATTCAATAGCTTTTTTCATTGCTTTGCGAAACGG
GACTCTATTCTTTAATTGTCCGGCTATAAATTCTGCAAGA
ATATTAGGGTGCCTGTAGGGCTTTTTAATTCTTTTAATAG
AAATGTTGAGCTTTTGGTTCACACAATTAAGTTCTTTTTG
TATATTTAGCTCTAATTCTTCGAGTTTTTTACTTTTAGGT
TTAGCTTCTATTAATAATTTTGGGAATCCCATATATATTA
TAACCTGAATCACATCAATTCGTTTTTGAATCTTTATACG
TGAAATTCCCTCAACACCAGAAGAAAGTTTCATATCTTTT
TGTACATAATTCTTGATACAGTTTCTTATTTTTTGATCTT
CTTGTAGACCCTCAGAATAATTTTTTGGTTGTGCAAACCA
AAGAGAATGATGACCTTGGGTCGTACCAAGTCTGAAACCA
AGTGGATTTATTTTTTGTCCCATAATCCCTCACTACTATA
CATATCATGACATGTTATATCCGTGGCTTTTTTTTTTTTT
TTTTTTTCCCCCCCCCCCCGATTTTTTTAAATATATGGTA
TATTATATTTTTCATATTCGTCATATAATTCTTCATCCAA
GGATATATCTTTCAGTACAATAGTTATATGACAAGTCGGT
CTTTTTATTAGAGAATTGCGCCCTCGAGCCCGAGGTTTTA
GTTTTTTCACAGTAGTACCCTCGTTGACTTCAGCTTTACT
AATGACTAAACTCGCTTTGTTGAAGCCCATATTGTGACTA
GCGTTTGCCGCTGCAGAATAAACTAATTTAAAAATGGGAT
AACATGCTTGATAAGGCATGAGCTCGAGTATCATAAGTGT
TTCCTCATAGGAACGTCCACGAATTTGATCAATTACTCTT
CGCGCTTTGTGGGCAGACATACATATATGTTGACTTCGAG
CATATACTTCTGTATATAAATATGAGTTGTTCCGTCTCTT
CTTTATCATAAGGTTCACCTCAAATCAAAATCCACAAACT
ATTAAGTATTTTATTATTAATGTAAATAGATAAGCATCTA
TAATGTATATTTGCTTTTATTAACGACGAGATTTATTATC
ATTTTTTGCATGTCCCCGGAAATTTAGAGTAGGTGAAAAT
TCTCCCAATTTATGACCCACCATACGATCTATTATATAAA
TAGGTAAATGTTGCTTTCCATTATGGATAGCAATAGTATG
GCCAATCATTGTGGGTATAATGGTAGATGCCCGGGACCAC
GTTACTATTATTTCTTTTTCTGCCTTTGTGTTAAGTTTCT
TTATTTTTCTTAATAAATGATTTGCTACAAAAGGGTTTTT
TTTTAGTGAACGTGTCACAGTCAATTTCTCCTATTTTTTT
TTTTGAAAAGACGAAGAAACAAATTCTATTTTCTCTCCTA
TTTACTACGGCGACGAAGAATCAAATTCTCACTATATTTA
TTCCTTTTTCTACTTCTTCTTCCAAGTGCAGGATAACCCC
AAGGGGTTGCGGGTTTTTTTCTACCAATTGGGGCCCTCCC
TTCACCACCCCCATGGGGATGGTCTACAGGGTTCATAACG
ACTCCTCTTACTATAGGACGCTTACCTAGCCAACATTTAG
ATCCGGCTCTACCCAAACTTTTCTGGTTCACCCCAGCATT
CCCTACTTGTCCGACTGTTGCTGAGCAGTTTTTGGATATT
AAACGAACCTCCCCAGAAGGTAATTTTAATGTGGCCGATT
TCCCCTCTTTTGCAATCAGTTTCGCTACAGCACCTGCAGC
TCTAGCTAATTGTCCACCCTTTCCAAGTGTGATTTCTATG
TTATGTATGGCCGTGCCTAAGGGCATATCGGTTGAAGTAG
ATTCTTCTTTTTGATCAATCAAAACCTCTTCCCAAACCGT
ACAAGCTTCTTCCAAAGCATACGGCTTTCTGGGTGTAGAT
GATGATATCTATACAGATGGATCTTATCTATCATACAATG
AAGTAAAGTACTACATGAGTGGATATATAGGAATCCAAAT
CTGCCGAATCACTCATGTTATGCTCTTCTACATCCTAGGT
CTTCCCGTTCCTTCATCTGGCTTATGTTCTTCATGTAGCA
TTCAGATCGAATGACTCTATGAAATTACGTCGATACTTCC
ACATATTAGGGGTAACGTAGGAGACATCTCTATTTTTCCC
CCGGGGAATCTTTAGAATTCCCACTGCTTAGCTTTCAATT
TGTCTCTGACCATCAAATGAAATGTGAATAACCCGTCTTC
CTCTCTTTGAAACAAGGGGCGCTTCTGGTTCTGTCGGTGC
TTGAAACAATTTTGTCTTCTCCATATTACTATATCTCTAG
AGTCAATAATTTTATATGAGGAACTACTGAACTCAATCAC
TTGCTGCCGTTACTCTTCAGTTTTCTGTTGAGGTCTATCC
TGTAGAGGTACTCAAATTGGATCAGTGATCGATTTCTAGG
TTTCGTCGTAAACCTAATTGGTTACTTCCAATTACGTAAA
TCAATAGTTCAAACCGCACTCAAAGGTAGGGCATTTCCCA
TTTTTATAGGAACTTCTGTACCAGAAATAATGGTATCTCC
AATTATAGCCCCTCTGGGATGTAAAATATATCTCTTCTCA
CCATCCCCATAGTGTATGAGACAAATGTATGCATTTCGAT
TAGGGTCGTATTCTATGGTTACGATTCTACCATATATGTC
TTTTTCATTCCGTCGAAAATCGATTTTACGGTATAGACGC
TTATGACCTCCCCCTCTATGCCTTGCGGTAATGATTCCTC
TAGCATTACGTCCTTTACCACAACGATGCTGTCCATAGAT
CAAATTATTTCGTGTATTGGATTTTACTTGACTGTCTACG
GCTCCATTGCGTGTGCTCGGGGTAGAAGTTTTGTATAAAT
ATATCGCCATGCTATTAAGTATTTTGATTTAAGTTCTTTT
CTTTCTAAGAGGTGGAATAGAATAACCCGGTTGAAGCGTA
ATGATCATACGTTTGTAATGCATTGTATGTCCCATAATAG
GTCTCATTCTTCTACCCTTTCCCGGGAGTCGATGGCTATT
CATAGCTATTACCTTGACACCAAAGAAGAGTTCGACCCAA
TGCTTTATTTCTGTCCTAGTTGATCCTAATTCGACATTAA
AAGTATATTGATTTTTCCCCAATAACTGAATACTTTTGTC
TGTAAATACTGCATATTTGATTCCATCCATAAATCTATTT
TCTTCCCTATGAGTTCTAGTCTCAGTAAGAATGCTAGTTC
TTACTGTTCATATGTTATGATATGAATATACCACACCAAT
TCGTTATGTATGGATGATGAGATTCCATTGATACAGAGCC
AATTCCAATAGACTTATTGGAGGGTCCCATTGGCGTGCAT
CCAGTAGGAATTGAACCTACGAATTCGCCAATTATGAGTT
GGGCGCTTTAACCATTCAGCCATGGATGCTTAGCGGGGAT
CCTCGTACATGGTGAATAACCAAATTCCAATTGAAATGAA
ATCTTTAGGATAAATCAATGCAATTTAGGAGGAATCAATG
AAAGGACATCAATTCAAATCCTGGATTTTCGAATTGAGAG
AGATATTGAGAGAGATCAAGAATTCTCACTATTTCTTAGA
TTCATGGACCCAATTCAATTCAGTGGGATCTTTCATTCAC
ATTTTTTTCCATCAAGAGCGTTTTATAAAACTCTTGGACT
CCCGAATTTGGAGTATCCTACTTTCACGCAATTCACAGGG
TTCAACAAGCAATCGATATTTCACGATCAAGGGTGTAGTA
CTATTTGTAGTAGTGGTCCTTATATATCGTATTAACAATC
GAAAGATGGTCGAAAGAAAAAATCTCTATTTGACAGGGCT
TCTTCCTATACCTATGAATTCCATTGGACCCAGAAATGAT
ACATTGGAAGAATCCTTTGGGTCTTCCAATATCAATAGGT
TGATTGTTTCACTCCTGTATCTTCCAAAAGGAAAAAAGAT
CTCTGAGAGCTGTTTCCTGGATCCGAAAGAGAGTACTTGG
GTTCTTCCAATAACTAAAAAGTGTATCATGTCTGAATCTA
ACTGGGGTTCGCGGTGGTGGAGGAACTGGATCGGAAAAAA
GAAGGATTCTAGTTGGAAGATATCTAATGAAACCGTCGCT
GGAATTGAGATCTCATTCAAAGAGAAAGATATCAAATATC
TGGAGTTTCTTTTTGTATATTATATGAATGATCCGATCCG
CAAGGACCACGATTGGGAATTGTTTGATCATCTTTCTCCG
AGGAAGGGGCGAAACATAATCAACTTGAATTCGGGACAGC
TATTCGAAATCTTAGTGAAAGACTGGATTTGTTATCTCAT
GTTTGCTTTTCGTGAAAAAATACCAATTGAAGTGGAGGGG
TTCTTCAAACAACAAGGAGCTGGGTCAACTATTCAATCAA
ATGATATTGAGCATGTTTCCCATCTCTTCTCTAGAAAGAA
GTGGGCTATTTCTTTGCAAAATTGTGCTCAATTTCATATG
TGGCAATTCCGCCAAGATCTCTTCGTTAGTTGGGGGAATA
ATCCGCACGAATCGGATTTTTTGAGGAACATATCGAGAGA
GAATTGGATTTGGTTAGACAATGTGTGGTTGGTAAACAAG
GATCGGTTTTTTAGCAAGGCACGGAATATATCGTCAAATA
TTCAATATGATTCCACAAGATCTAGTTTCGTTCAAGGAAG
GGATTCTAGCCAATTGAAGGGATCTTCTGATCAATCCAGA
GATCATTTCGATTCCATTAGGAATGAGGATTCGGAATATC
ACACATTGATCAATCAAAGAGAGATTCAACAACTAAAACT
AAAAGAAAGATTGATTCTTTGGGATCCTTCCTTTCGTCAA
ACGGAACGAACAGAGATAGAATCAGACCGATTCCCTAAAT
GCCTTTCTGGATATTCCTCAATGTCCCGGCTATTCGCGGA
AGGTGAGAAGGAGATGAATAATCATCTGCTTCCGGAAGAA
ATTGAAGAATTTCTTGGGAATCCTACAAGATCCATTCGTT
CTTTTTTCTCTGACAGATGGTCCGAACCTCATCTGGGTTC
GAATCCTACTGAGAAGTCCACTAGAGATCAGAAATTGTTG
AAGAAAGAACAAGATATTTCTTTTGTCCCTTCCAGGCGAT
CGGAAAATAAAGAAATAGTGAATATATTCAAGATAATTAC
GTATTTACAAAATACCGTCTCAATTCATCCTATTTCATCA
GATCCGGGATGTGATATGGTTCTGAAGGATGAACTGGATA
TGGACAGTTCCAATAAGATTTCTTTCTTGAACAAAAATCC
ATTTTTTGATTTATTTCATCTATTCCATGATCGGAACGGG
GGGGGATACACGTTACACCACGATTTTGAATCAGAAAAGA
GATTTCAAGAAATAGCGGATCTATTCACTCTATCAATAAC
CGAGCCGGATCGGGTGTATGATAAGGGATTTGCCTTTTTT
ATTGATTCCTACGGATTGGATCAAAAACAATTCTTGAATG
AGGTATTCAACTCCAGGGATGAATCGAAAAAGAAATCTTT
ATTGGTTCTACCTCCTATTTTTTATGAAGAGAATGAATCT
TTTTATCGAAGGATCAGAAAAAGATGGGTCCGGATCTCCT
GCGGGAATGATTTGGAAGATCCAAAACAAAAAATAGTGGC
TAGGAACAACATAATGGAGGCAGTCAATCAATATGGATTG
ATCCGAAATCTGATTCAAATCCAATATAGCACCTATGGAA
GAAATGTATTGAATCAATTCTTTTTAATGAATAGATCCGA
TCGCAACTTCGAATATGGAATTCAAAGGGATCAAATAGGA
AATGATACTCTGAATCATAGAACTATAATGAAATATACGA
TTAACCAACATTTATCGAATTTGAAACAGAGTCAGAAGAA
ATGGTTCGATCCTCTTATTTTTCTTTCTCGAACCGAGAGA
TCCATGAATTGGGATCCTAATGCATATAGATACAAATGGT
CTAATGGGAGCAAGAATTTCCAGGAGCATTTGGAACATTT
CATTTCTGAGCAGAAGTTTCAAGTAGTGTTCGATCGATTA
CGTATTAATCAATATTCGATTGATTGGTCTGAGGTTATCG
ACAAAAAAGATTTGTCTAAGTCACTTCGTTTCTTTTTGTC
CAAGTTACTTCTTTTTTTGTCCAAGTTTCTTCTCTTTTTG
TCTAACTCACTTCCTTTTTTCTTTGTGAGTTTCGGGAATA
TCCCCATTCAAAGGTCCGAGATCCATATCTATGAATTGAA
AGGTCCGAATGATCAACTCTGTAATCAGCTGTTAGAACCA
ATAGGTCTTCAAATCGTTCATTTGAAAAAATGGAAACCCT
TCTTATTGGATGATCATGATACTTCCCAAAAATCGAAATT
TTTGATCAATGGAGGAACAATATCACCATTTTTGTTCAAT
AAGATACCAAAGTGGATGATTGACTCATTCCATACTAGAA
ATAATCGCAGGAAATCTTTTGATAACACGGATTCCTATTT
CTCAATGATATCCCACGATCAAGACAATTGGCTGAATCCC
GTAAAACCATTTCATAGAAGTTCATTGATATCTTCTTTTT
ATAAAGCAAATCGACTTCGATTCTTGAATAATCTACATCA
CTTCTGCTTCTATTGTAACAAAAGATTCCCTTTTTATGTG
GAAAAGGCCCGTATCAAGAATTATGATTTTACGTATGGAC
AATTCCTCAATATCTTGTTCATTCGCAACAAAATATTCTC
TTTGTCTTTGTGCGGCGGTAAAAAAAAACATGCTTTTTTG
GAGAGAGATACTATTTCACCAATCGAGTCACAGGTATCTA
ACATATTCATACCTAATGATTTTCCACGAAGTGGTGACGA
AAGGTATAACTTGTACAAATCTTTCCATTTTCCAATTCGA
TCCGATCCATTCGTTCGTAGAGCTATTTATTCGATCGCAG
ACATTTCTGGAACACCTCTAACAGAGGGACAAATAGTCAA
TTTTGAAAGAACTTATTGTCAACCTCTTTCGGATATGAAT
CTATCTGATTCAGAAGGGAAGAACTTGCATCAGTATCTCA
ATTTCAATTCAAACATGGGTTTGATTCACACTCCATGTTC
TGAGAAAGATTTACCATCCGAAAAGAGGAAAAAACGGAGT
CTTTGTCTAAAGAAATGCGTTGAAAAAGGGCAGATGTATA
GAACCTTTCAACGAGATAGTGCTTTTTCAACTCTCTCAAA
ATGGAATCTATTCCAAACATATATGCCATGGTTCCTTACT
TCGACAGGGTACAAATATCTAAATTTGATATTTTTAGATA
CCTTTTCAGACCTATTACCGATACTAAGTAGCAGTCAAAA
ATTTGTATCCATTTTTCATGATATTATGCATGGATTAGAT
ATATCATGGCGAATTCTTCAGAAAAAATTGTGTCTTCCAC
AATGGAATCTGATAAGCGAGATTTCGAGTAAGTGTTTACA
TAATCTTCTTCTGTCCGAAGAAATGATTCATCGAAATAAT
GAGTCACCATTGATATCGACACATCTGAGATCGCCAAACG
TTCGGGAGTTCCTCTATTCAATCCTTTTCCTTCTTCTTGT
TGCTGGATATCTCGTTCGTACACATCTTCTCTTTGTTTCC
CGAGCCTCTAGTGAGTTACAGACAGAGTTCGAAAAGGTCA
AATCTTTGATGATTCCATCATACATGATTGAGTTGCGAAA
ACTTCTGGATAGGTATCCTACATCTGAACTGAATTCTTTC
TGGTTAAAGAATCTCTTTCTAGTTGCTCTGGAACAATTAG
GAGATTTTCTAGAAGAAATACGGGGTTCTGCTTCTGGCGT
CAACATGCTATGGGGTGGTGGTCCCGCTTATGGGGTCAAA
TCAATACGTTCTAAGAAGAAATTTTTGAATATCAATCTCA
TCGATCTCATAAGTATCATACCAAATCCCATCAATCGAAT
CACTTTTTCGAGAAATACGAGACATCTAAGTCATACAAGT
AAAGAGATTTATTCATTGATAAGAAAAAGAAAAAACGTGA
ACGGTGATTGGATTGATGATAAAATAGAATCCTTGGTCGC
GAACAGTGATTCAATTGATGATAAAGAAAGAGAATTCTTG
GTTCAGTTCTCCACCTTAACGACAGAAAAAAGGATTGATC
AAATTCTATTGAGTCTGACTCATAGTGATCATTTATCAAA
GAATGACTCTGGTTATCAAATGATTGAAGAGCCGGGATCC
ATTTACTTACGATACTTAGTTGACATTCATAAAAAGTATC
TAATGAATTATGAGTTCAATACACCCTGTTTAGCCGAAAG
ACGGATATTCCTTGCTCATTATCAGACAATCACTTATTCA
CAAACCTCGTGTGGGGCGAATAGTTTTCATTTCCCATCTC
ATGGAAAACCCTTTTCGCTCCGCTTAGCCCTATCCCCCTC
TAGGGGTATTTTAGTGATAGGTTCTATAGGAACTGGACGA
TCCTATTTGGTCAAATACCTAGCGACAAACTCCTATGTTC
CTTTCATTACAGTATTTCTTAACAAGTTCCTGGATAACAA
GCCTAAGGGTTTTCTTATTGATGATAGTGACGATATTGAT
GTGAGTGACGATCTCGACCGTGACCTTGATACGGAGCTGG
AGCTTCTAACTAGGATGAATGCGCTAACTATGGATATGAT
GCCGGAAATAGACCGATTTTATATCACCCTTCAATTCGAA
TTAGCAAAAGCAATGTCTCCTTGCATAATATGGATTCCAA
ACATTCATGATCTGGATGTGAATGAGTCGAATTACTTATC
CCTTGGTCTATTAGTGAACTATCTCTCCAGGGATTGTGAA
AGATGTTCCACTAGAGATATTCTTGTTATTGCTTCGACTC
ATATTCCCCAAAAAGTGGATCCCGCTCTAATAGCTCCGAA
TAAATTAAATACATGCATTAAGATACGAAGGCTTCTTATT
CCACAACAACGAAAGCACTTTTTCACTCTTTCATATACTA
GGGGATTTCACTTGGAAAAGAAAATGTTCCATACTAATGG
ATTCGGGTCCATAACCATGGGTTCCAATGTACGAGATCTT
GTAGCACTTACCAATGAGGCCCTATCAATTAGTATTACAC
AGAAGAAATCAATTATAGACACTAATATAATTAGATCTGC
TCTTCATAGACAAACTTGGGATTTGCGATCCCAGGTAAGA
TCGGTTCAGGATCATGGGATCCTTTTCTATCAGATAGGAA
GGGCTGTTGCACAAAATGTATTTCTAAGTAATTGCCCCGT
AGATCCTATATCTATCTATATGAAGAAGAAATCATGTAAT
GAAGGGGATTCTTATTTGTACAAATGGTACTTCGAACTTG
GAACGAGCATGAAGAAATTGACGATACTTCTTTATCTTTT
GAGTTGTTCTGCCGGATTGGTTGCTCAAGACCTTTGGTCT
CTACCCGGACCCGATGAAAAAAATGGGATCACTTATTATG
GACTTGTTGAAAATGATTCGGATCTAGTTCACGGCCTATT
AGAAGTAGAAGGCGCTCTGGTGGGATCCTCACGGACAGAA
AAAGATTGCAGTCGGTTTGATAATGATCGAGTGACATTGC
TTCTTCGGCCCGAACCAAGGAGTCCCTTAGATATGATGCA
AAATGGATCTTGTTCTATCCTTGATCAGAGATTTCTCTAT
GAAAAATACGAATCGGAGTTTGAAGAAGGGGAAGGAGAAG
GAGTCCTCGATCCACAACAGATAGAGGAGGTTTTATTCAA
TCACATAGTTTGGGCTCCTAGAATATGGCGCCCCTGGGGC
TTTCTATTTGATTGTATCGAAAGGTCCAATGAATTGGGAT
TTCCCTATTGGGCCAGGTCATTTCGGGACAAGCGGATCAT
TTATGATGAAGAGGATGAGCTTCAAGAGAACGATTCGGAG
TTCTTGCAGAGTGGAACCATGCAGTACCAGACAGGAGATA
GATCTTCCAAAGAACAAGGCTTTTTTCGAATAAGCCAATT
CATTTGGGACCCTGCGGATCCACTCTTTTTCCTATTCAAA
GATCCCCCCTTTGTCTCTGTGTTTTCACATCAAGAATTCT
TTGCAGATGAAGAGATGTCAAAGGGGCTTCTTACTTCCCA
AACCAATCCTCCTACATCTATATATAAACGCTGGTTTATC
AAGAATACGCAAGAAAAGCACTTCGAATTGTTGATTCATC
GCCAGAAATGGCTTAGAACCAATAGTTCATTATCTAATGG
ATTTTTCCGTTCTAATACTCTATCCGAGAGTTATCAGTAT
TTATCAAATCTGTTCCTATCTAACGGAACGCTATTGGATC
AAATGACAAAGGCATTGTTGAGAAAAAGATGGCTTTTCCC
GGATGAAATTGGATTCATGTAATAGGAGAAAGGTTTCCCA
TTCCTTAGCCTGAAAGATATGTGGCCATGAAATAGAGATT
AAGTGGAACAGAATTGACTGGGTGGTAAAGTCGTGGAAAC
ACCTCTTTCTTCCATATTTTGGACATGGAAGAATATGTTA
CTGCTGAAACATGGAAGAATTGAAATCTTAGATCAAAACA
CTATGTATGGATGGTATGAACTGCCTAAACAAGAATTCTT
GAACAGCGAGCAACCAGAGCTATTACTCACTACATCAAAA
AATTTCCATTAATGAAAGATGTAAATCCATTGGAAAATCA
AAAATACGTATGTCGGATGAAATGGTGGTTGTTGCTATCT
GCTCCAATAACGAATCATTGGTTTAACTGAATAACTAAAT
GAATAACTAAATAAAATAGATAGACCCTTCTCTTCGTCTC
AGGTCGATGGATCTTCTCAATTGGAAGATCCCCTATATGG
ATAATACACATTCCAGTTGACCGGGCCTAATTCTAATTGT
TTTGTTCCGAAGCAAAGATATCCACGGGGCGGTTCGTCCT
ATTCAGATATTCACGACCAAGAAGTACTGGATTCTCTTTC
GGATAGTCCCTGAAAGGAGAAGGAAGGATGGAATGCCAAC
AGACGCCTATTATTGAATTCACCCGACCCGATAGTACCCA
TTTTTTTTTGGGACCATCCAGTGCCAAAGTCACTGAATGG
GTAAGTCGCCAATCCCTAAAACGGACTATGTAATGTACTT
TATCTGTTGGGTGACGGGCGGGCATTTTACCAGAGGTTTC
TATTGTATCAATCTACCCTTGTGTAATTCCTGTTGAAGCA
TATACTCGGGGGTGGTTGCAGGGCGAACGATTTCAAAGCG
GACTCCCCATTCATTAGATAGAGAAGATCACCAAGATTTC
GTGATCCGCTGCCGAACTTATTCCAATTCAATGAGCATTC
TCAATATTATGCCTTGAAGAGGACTCGAACCTCCACGCTC
TTTAGCACGAGATTTTGAGTCTCGCGTGTCTACCATTTCA
CCACCAAGGCATCTTGAAAGTGAATCGTATTCCATGAATA
TGATATCTATCTAGTGTGATGTATGGAATATATGACAAAG
GTGGAGTGTTGGAGTATTTCTATTGATCGTTCATGTCATA
TAGGCCCGAGTCGGACATCCAATTGCTTCGATTTGAATTA
TCCGGAACATGCCTTATATATATATTATAGCAAAAAATTA
TAGCAAAAAAATGGACAATCAAACCCATTTCTCGATTCAA
TAGACGCCCAAAGAGGTGAATAGAATAGGGTCCCAAATAA
GGAGAGATATATATGTAAAAAGCAGGTCCGATTACGCCTA
TTCCTAATCCTAAATGGAATGTAACGACGGAGGGATCCAT
ATGTAAACATAGTATCTATTTAGATACGATAGTATCTATT
TAGATACGCTCGAATGACCCCTTCTCATAATGAGAATGTA
TATAAGCCTATTCCGGTCTGGTCCGGTATGGAATGAACTT
ATAATCATGGAATCGACTCGATTATCAGATTATAAGTTCA
TAACCCTAGCCCATTCCCATTTTGGGCGGAACAGATCTAC
TAATTCTTTGATTCCAGTTAGTAAGAGGGATCTTGAACTA
AGAAATAGGTTCTAGAAGCTAAAAAAGGGTATCTTGAGCA
ATTTCAATAATCGGGTTCATTGATATTCCTGGTATAGTAG
ATGCTATTACACATACAATCATACTCAATTCGATGGAATT
GTTTGATCTTAAAGGGGATCTTCTATAATTTCGCACGTGA
GGGGTTATTTCTTGGTTTCGTCCAGTCATTAATAACTTGA
TTATTTTTAGATAATAGTAGATAGAAACAACGCTCGTAAG
GAGTCCTATTGAAACCAAGAAATATAGGCCTGCCTGCCAT
CCACACCAGAATAAATGGAGTTTTCCGAAAAAACCTGCTA
GTGGAGGAAGACCTCCTAGGGATAAGAGACATAGGGCTAA
AGAGAGAGCCAAAAAAGGATCTTTCGTGTATAATCCTGCA
TAATCTCGAATGTTATCAGTTCCGGTACGTAGACCAAATA
ATACAATGCAAGCAAAAGTTCCTAGATTCATGGAGATATA
GAAGAAGATATAAGTTATCATGCTTGCATATCCACCATTT
GAGTCTCCAACAATGATTCCAATAATTACATATCCGATTT
GACCTATGGACGAATATGCAAGCATACGTTTCATGCTTGT
TTGAGTAATAGCAATGAGATTCCCCACTATCATGCTCAGA
ATAGCTAGGATTTCCAGAAGAAGATGCCATTCGTTTGATG
AGAAATAAAAAGGAATATCGAAAATTCGAGTGGCTGAAGC
TGAAGCAGCTACTTTCGAAGTAACAGAAAGAAAAGCAACG
ACTGGAGTGGGAGAGTCAGAGTCGAAAAGAGGATTCCTCA
CTTCTTTCTCTCATTCAAAACCGTGCATGAGACTTTCATC
TCGCACGGCTCCTAAGTGATAAAAGAAAGAAGAACTCATC
TTCTTTCTTTTTTGATTACCTTCCTCGCGTATGTATAAGA
CCGAATCCATTCGATTTCTAAAAAGGATTACTAATCCTTA
ACTTTTCGAGGAATCCTTCATCAGTGGTTGTGAATGACCA
ATTTTTCTCAATCTTTCTGACTTGCTCCTACGGAACCAAG
AGGTCGAAAAGATTGAGAAATAGAACCATCTGATTTGATT
CGTTCTCAATAGCCATGAGATGATCATCTTAGGGTGATCC
TTTTGTCGACGGATGCTCCTATTACACTCGTAGTCTCTGA
AGGATGAGAACCAACTATGTAGCATCTACATCGAGAATTT
AAATATTGTATACGTCATTAGTCCGATCTTTTGTAGGAGC
TACCCGTAATAACGAACTTGCAAAATGAATCTTGTTTATC
ATAAAGAGATTCGTTGTTCCTGACGCTGCTTCACCTTAAT
TGTTATTTGAACAAGTAAAAGTTATGTCTTGGTCCGAGTG
CGGATAGCATTTCTCTTCTGCATGTCCATGGAGTTTTGAA
AAATCCAAGCATCTCAGAGATAGATAGAGAAGTAGGAATT
TTTCGAACGAACCGCACTCCTTCGTATACGTCAGGAGTCC
ATTGATGAGAAGGGGCTAGGGAAAGCTTGAACCCAATTCC
TACAGTGATGAATATAAGCGCAATTGAAATTCCTGGGGAG
TTATACATTTGTGTATTGATAAGACCATTCACTATTTCTT
GAAGCTCGATCTCTCCCCCGGACGAACCATATAGCCAAGA
GAAACCATGAACCAGAATAGAAGAGCTTGCCCCACCCATG
AGTAAATATTTCATAGTAGCCTCATTAGACCGTACATCTT
TCTTGGTATATCCAGATAATAGGTAGGAGCATAAACTGAA
ACATTCTGGAGCTACAAAGATAGTTATTAAATCGTTAGCA
CCGCATAAAAACATTCCTCCTAGAGTAGCTGTTAATACGA
ATAAGAGAAACTCTGTTATAGCCATTTCTGTACATTCAAT
GTACTCTACGGATAGAGGAATACATAGAGTTGAACATAGT
AAAATAAGAAATTGAAATATTTCGTTGAAATTGTTCGTTT
GGAAATTTCCCGAAAAGCTAATCATAGGTTCTTCTCTCCA
TCGGAACAATAGGGCCGTTATACTCATTACTAAACTTGTT
GAAGAGATGAAATAAAACCAAGGTATATCTTTTTGATCAG
AAGTTGAATCGATCATCAGAAGAAGAATTAGGCCAAAAAT
TAGGATACATTCTGGGAAAATCAAACTTCCATCGAAGAGA
AGCAAATGAAAGGCTTTCATAAAAATTCTCGTAGAATCGA
GAATGAAGTTTTCATTCTGTACATGCCAGATCATGAATTA
GTAACTGCATCCAATCTCCAAAAAATCCCAATTGTTTCGA
ACTTTCTCTTTTTTTTTTTGGAATGGAATATTTACGGAAT
CCCCATAAATAGGATCAAACCTTATTCCATGGTATTTACC
TTTTTTTTATTCTTATCTTAAGCAAGTCCCCGAGAGGGCT
TAATTGATCCATGATTTATGTTTCATCTTTCGTTTCCTTT
TCGTTTGTTTCGAGAAATATAGCGATCAATTCCGATTCTT
TCTTTTTCTATTGATTCTTTTCCGATCGAGATGTATGGCT
CCATGAGTCTATATAGATCCTGTTCATGGATTAACGAAAA
TGCGCAAAAGCTCTATTTGCCTCCGCCATTCTATGAGTCT
CTTCCTTTTTGCGTATGGCATCGCCACTCCCTTTGGCAGC
ATCCACTAATTCGGAACTTAATTTGAAAGCCATATTTCGG
CCCGGACGTTTTCGGGATGCCCCTAATAACCAACGAATGG
CAAGTGCTTTTCCTTGTGTGGATCCTATTTCAATGGGAAC
TTGATGAGTCGATCCGCCTACACGTCTTGCTTTTACTGCT
ATATCGGGAGTTACTCCACGTATTGCTTGACGTAAAACAG
ATAGTGGATTTGTTTCTGTCTTTTGTTGAATCTTTTTCAT
GGCTCGATAGATAATTTGATAAGCCAATGATTTTTTTCCG
TGTTTCAGAATACGGTTAACCAACATGTTAACTAATCGAT
TACGATAAATTGGATCGGATTTTGCAGTTTTTTCTTCTGC
AGTACCTCGACGTGACATGAGCGTACAAGGGGTTCTCAAG
AATCAGTTTTCCTTTTATAAGGGCTAATAAAATCATTTAT
TTTGGCTTTTTGACCCCATATTGTAGGGTGGATCTCGAAA
GATATGAAAGACCTCCCTCCAAGCCGTACATACGACTTTC
ATCGAATACGGCTTTCCACAGAATTCTATATGTATCTATG
AGATTGAGTATGGAATTCTATTTACTCACTTTAAATTGAG
TATCCGTTTCCCTCCTTTTCCTGCTAGGATTGGAAATCCT
GTATTTTACATATCCATACGATGGAGTCCTTGGGTTTCCG
AAAAAGTGTAAAAAGAAGTGCTTTGAATCATTGCTATTTG
ACTCGGACCTGCTCTAAAAAAGTCGAGGCATTTCGAATTG
TTTGTTGACACGGACAAAGTCAAGGAAAACCTCTGAAATT
CTTCCAATATTGGACCTTGGACATATAAGAGTTCCGAATC
TCTTTAGTAAAGAAGATCTTTTGTCTCATGGTAGCCTGCT
CCAGTCCCCTTACGAAACTTTCGTTATTGGGTTAGCCATA
CACTTTACATGTTTCTAGCGATTCACATGGCATCATCAAA
TGATACAAGTCTTGGATAAGAATCTACAACGCACTAGAAC
GCCCTTGTTGACGATCCTTTACTCCGACAGCATCTAGGGT
TCCTCGAACAATGTGATATCTCACACCGGGTAAATCCTTA
ACCCTTCCCCCTCTTACTAAGACTACAGAATGCTCTTGTA
AATTATGGCCAATACCGGGTATATAAGCAGTGATTTCAAA
TCCCGAGGTTAATCGTACTCTGGCAACTTTACGTAAGGCA
GAGTTTGGTTTTTTGGGGGTAATAGTGGAAAAGTTGACAG
ATAAGTCATCCTTACTGCCACTCTACAGAACCGTACATGA
GATTTTCACCTCATACGGCTCCTCGTTCAATTCTTTCGAA
GTCATTGGATCCCTTTCCTCGTTCGAGAAGCTCCTCCCTT
CATCCACTCCGTCCCCAAGAGTAACTAGGACAAATTTAGT
CACGTTTTCATGTTCCAATTGAACACTTTCTTTTTTTGAT
TATTCTCAAAGGAGAAGATTCTTCTTTTTACCAAACATAT
GTGGATCCAATCACGATCTTATAATAAGAACAAGAGATCT
TTCTCGATCAATCCCTTTGCCCCTCATTCTTCGAGAATCA
GAAAGATTTTTTTCAAGTTTGAATTTGTTCATTTGGAATC
TGGGCTCTTCTACTTCATTTTTATTTATTTCTTTTTTATT
CCCTTCCGTCATTCCTTAAGTCCCATAGGTTTGATCCTGT
AGAATCTGACCCATTTTCTCACTGAGCGAAGGGTACGAAA
TAAATCAGATTGATTTTTCGATCAAAAGTACTATGTGAAA
TCTTCGGTTTTTTCCTCTTTCGCTAGCCCTATCCTATAGG
CCTATAGGTACAGCCTTTGAATCAATAGAGATTCTTCTAT
ATCTGTATGAATCGATATTATTACATTCCAATTCCTTCCC
GACACCTCCCAAGGAAAATCCCGAATTGGATCCCAAATTG
ACGGGTTAGTGTGAGCTTATCCATGCGGTTATGCACTCTT
CGAATAGGAATCCTTTTTCTGAAAGATCCTGGCTTTCGTG
CTTTGGTGGGTCTCCGAGATCCTTTCGACGACCTATGTTG
TGTTGAAGGGATATCTATATGATCCGATCGATTGCGTAAA
GCACGCGGTAGCAACGGAACCGGCGAAAGTATAAAGAAAA
GACAGTTCTTTTCTATTCTATCTATTATATTAGTATTAGT
ATTTTCTATTAGTAATAGATTAGTATTAGTTAGTGATCCT
GGCTCAGTGAGTCCTTTGTGATGAACTGTTGGCACCAGTC
CTACATTTTGTCTCTGTGGACCGAGGAGAAAGGGGCTTAG
CGAGAAGAGGATTGTACCATGAGAGAAGCAAGGAGGTCAA
CCTCTTTCAAATATACAACATGGATTCTAGCAATGCAATG
TAGTTGGACTCTCATGTCGATCCGAATGAATCATCCTTTC
CACGGAGGTAAATCTTTGCCTGCTAGGCAAGAGGATAGCA
AGTTACAAATTCTGTCTCGGTAGGATATATATGTATTTTA
TTTCTATTACTATGAAATTCATAAATGAAGTAGTTAATAA
ATGAAATAGTTAATGGTGGGGTTACCATTATCCTTTTTGT
AGTGACGAATCTTGTATGTGTTCCTAAGAAAAGGAATTTG
TCCATTTTTCGGGGTCTCAAAGGGGCGTGGAAACACATAA
GAACTCTTGAATGGAAAAGAGATGGAACTCCAGTTCCTTC
GGAAATAGTAAGATCTTTGGCGCAAGAAGAAGGGGTTGAT
CCGTATCATCTTGACTTGGTTCTGATTTCTCTATTTTTTT
AAGAATACCGAGTCGGGGTCTTCTCCTACCCGTATCGAAT
AGAACATGCTGAGCCAAATCTTCTTCATGTAAAACCTGCT
TTATTTAGATCGGGAAAATCATACGCTTTTATGAAACCAT
GTGCTATGGCTCGAATCCGTAGTCAATCCTATTTCCGATA
GGAGCAGTTGACAATTGAATCCAATTTTTCCCATTATTTT
CGTATCCGTAATGGTGCGAAAAGAAGGACCGACTCCAAGT
TGTTCAAAAGTAGTGGCGTTGAGTTTCTCGACCCTTTGCC
TTCGGATTAGTCAGTTCTATTTCTCGATGGGGGCAAGGGA
AGGGATATAACTCAGCGGTAGAGTGTCACCTTGACGTGGT
GGAAGTCATCAGTTCGAGCCTGATTATCCCTAAACCCAAT
GTGAGTTTTTCTATTTTGACTTGCTCCCCCGCCGTCGTGA
TCGAATGGATAAGAGGCTCGTGGGATTGACGTGAGGGGGT
AGGGACGGCTATATTTCTTGGAGCGAACTCTAAGCGAATA
TGAAGCGCATGGATACAAGTTATGCCTTGAAATGAAAGAC
AGTTCCGAATCAGCTTTGTCTACGAATAAGGAAGCTATAA
GTAATGCAACTAAGAATCTCATGGAGAGTTCGATCCTGGC
TCAGGATGAACGCTGGCGGCATGCTTAACACATGCAAGTC
GGACGGGAAGTGGTGTTTCCAGTGGCGGACGGGTGAGTAA
CGCGTAAGAACCTGCCCTTGGGAGGGGAACAACAGCTGGA
AACGGCTGCTAATACCCCGTAGGCTGAGGAGCAAAAGGAG
GAATCCGCCCGAGGAGGGGCTCGCGTCTGATTAGCTAGTT
GGTGAGGCAATAGCTTACCAAGGCGATGATCAGTAGCTGG
TCCGAGAGGATGATCAGCCACACTGGGACTGAGACACGGC
CCAGACTCCTACGGGAGGCAGCAGTGGGGAATTTTCCGCA
ATGGGCGAAAGCCTGACGGAGCAATGCCGCGTGGAGGTAG
AAGGCCTACGGGTCGTGAACTTCTTTTCCCGGAGAAGAAG
CAATGACGGTATCTGGGGAATAAGCATCGGCTAACTCTGT
GCCAGCAGCCGCGGTAATACAGAGGATGCAAGCGTTATCC
GGAATGATTGGGCGTAAAGCGTCTGTAGGTGGCTTTTTAA
GTCCGCCGTCAAATCCCAGGGCTCAACCCTGGACAGGCGG
TGGAAACTGCCAAGCTGGAGTACGGTAGGGGCAGAGGGAA
TTTCCGGTGGAGCGGTGAAATGCGTAGAGATCGGAAAGAA
CACCAACGGCGAAAGCACTCTGCTGGGCCGACACTGACAC
TGAGAGACGAAAGCTAGGGGAGCGAATGGGATTAGATACC
CCAGTAGTCCTAGCCGTAAACGATGGATACTGGGCGCTGT
GCGTATCGACCCGTGCAGTGCTGTAGCTAACGCGTTAAGT
ATCCCGCCTGGGGAGTACGTTCGCAAGAATGAAACTCAAA
GGAATTGACGGGGGCCCGCACAAGCGGTGGAGCATGTGGT
TTAATTCGATGCAAAGCGAAGAACCTTACCAGGGCTTGAC
ATGCCGCGAATCCTCTTGAAAGAGAGGGGTGCCTTCGGGA
ACGCGGACACAGGTGGTGCATGGCTGTCGTCAGCTCGTGC
CGTAAGGTGTTGGGTTAAGTCCCGCAACGAGCGCAACCCT
CGTGTTTAGTTGCCACCGTTGAGTTTGGAACCCTGAACAG
ACTGCCGGTGATAAGCCGGAGGAAGGTGAGGATGACGTCA
AGTCATCATGCCCCTTATGCCCTGGGCGACACACGTGCTA
CAATGGCCGGGACAAAGGGTCGCGATCCCGCGAGGGTGAG
CTAACTCCAAAAACCCGTCCTCAGTTCGGATTGCAGGCTG
CAACTCGCCTGCATGAAGCCGGAATCGCTAGTAATCGCCG
GTCAGCCATACGGCGGTGAATTCGTTCCCGGGCCTTGTAC
ACACCGCCCGTCACACTATGGGAGCTGGCCATGCCCGAAG
TCGTTACCTTAACCGCAAGGAGGGGGATGCCGAAGGCAGG
GCTAGTGACTGGAGTGAAGTCGTAACAAGGTAGCCGTACT
GGAAGGTGCGGCTGGATCACCTCCTTTTCAGGGAGAGGTA
ATGCTTGTTGGGTATTTTGGTTTGACACTGCTTCACACCC
CAAAAGAAGGGAGCTACGTATGAGTTAAACTTGTCGACGG
AAGTCTTCTTTCGTTTCTCGACGGTGAAGTAAGACCAAGC
TCATGAGCTTATTATCCTAGGTCGGAACAAGTTGATAGGA
TCCCCCTTTTTTTCGCCCCCATGTCGCCACGCGGGAGGGA
CATGGGGGCGAAAAAAGGAAAGAGAGGGATGGGGTTTCTC
TCGCTTTTGGCATAGCGGGCCCCCGGCGAGAGGCCCGCAC
GACGGGCTATTAGCTCAGTGGTAGAGCGCGCCCCTGATAA
TTGCGTCGTTGTGCCTGGGCTGTGAGGGCTCTCAGCCACA
TGGATAGTTCAATGTGCTCATCAGCGCCTGACCCTGAGAT
GTGGATCATCCAAGGCACATTAGCATGGCGTACTTCTCCT
GTTCGAACCGGGGTTTGAAACCAAACTTCTCCTCAGGAGG
ATAGATGGGGCGATTCGGGTGAGATCCAATGTAGATCCAA
CTTTCTATTCACTCGTGGGATCCGGGCGGTCCGGGGGGGA
CCACCATGGCTCCTCTCTTCTCGAGAATCCATACATCCCT
TATCAGTGTATGGACAGCTATCTCTCGAGCACAGGTTTAG
GTTCGGCCTCAATGGGAAAATAAAATGGAGCACCTAACAA
CGTATCTTCACAGACCAAGAACTACGAGATCGCCCCTTTC
ATTCTGGGGCGACGGAGGGATCGTACCATTCGAGCCTTTT
TTTTTCATGCTTTTCCCGGAGGTCTGGAGAAAGCTGCAAT
CAATAGGATTTTCCTAACCCTCCCTTCCCGAAAGGAAGAA
CGTGAAATTCTTTTTCCTTTCCGCAGGGACCAGGAGATTG
GATCTAGCCGTAAGAAGAAGGCTTGGCTGATAAATAACTC
ACTTCTTGGTCTTCGACCCCCTCAGTCACTACGAACGCCT
CCGATCAGTGCAATGGGATGTGTCTATTTGTCTATCTCTT
GGCTCGAAATGGGAGCAGGTTTGAAAAAGGATCTTAGAGT
GTCTAAGGTGGGGCCAGGAGGGTCTCTTAACGCCTTCTTT
TTTCTTCTCATCGGAGTTATTTCAAAAAGACTTGCCATGG
TAAGGAAGAAGGGGGGAACAAGCACACTTGGAGAGCGCAG
TACAACGGAGAGTTGTATGCTGCGTTCGGGAAGGATGAAT
CGCTCCCGAAAAGGAATCTATTGATTCTCTCCTAATTGGT
TGGACCGTAGGTGCGATGATTTACTTCACGGGCGAGGTCT
CTGGTTCAAGTCCAGGATGGCCCAGCTGCGCCAAAGAAAA
GAATAGAAGAAGCATCTGACTCCTTCATGCATGCTCCACT
TGGCTCGGGGGGATATAGCTCAGTTGGTAGAGCTCCGCTC
TTGCAATTGGGTCGTTGCGATTACGGGTTGGATGTCTAAT
TGTCCAGGCGGTAATGATAGTATCTTGTACCTGAACCGGT
GGCTCACTCTTTCTAAGTAATGGGGAAGAGGACCGAAACA
TGCCACTGAAAGACTCTACTGAGACAAAGATGGGCTGTCA
AGAACGTAGAGGAGGTAGGATGGGCAGTTGGTCAGATCTA
GTATGGATCGTACATGGACGATAGTTGGAGTCGGCGGCTC
TCCTAGGGTTCCCTCATCTGGGATCCCTGGGGAAGAGGAT
CAAGTTGGCCCTTGCGAACAGCTTGATGCACTATCCCCCT
TCAACCCTTTAGCGAAATGCGGCAAAAGGAAGGAAAATCC
ATGGACCGACCCCATCGTCTCCACCCCGTAGGAACTACGA
GATCACCCCAAGGACGCCTTCGGCATCCAGGGGTCGCGGA
CCGACCATAGAACCCTGTTCAATAAGTGGAAGGCATTAGC
TGTCCGCTCTCAGGTTGGGCAGTAAGGGTCGGAGAAGGGC
AATCACTCATTCTTAAAACCAGCATTCTTAAGCCAAAGAG
TGGGGCGGAAAGGGGGAAAGCTCTCCGTTCCTGGGTTTCC
TGTAGCTGGATCCTCCGGAACCACAAGAATCCTTAGTTAG
AATGGGATTCCAACTCAGCACCTTTTGAGATTTTGAGAAG
AGTTGCTCTTTGGAGAGCACAGTACGATGAAAGTTGTAAG
CTGTGTTCGGGGGGGAGTTATTGTTTATCGTTGGCCTCTA
TGGTAGAATCAGTCGGGGGGCCCGAGAGGCGGTGGTTTAC
CCTGTGGCGGATGTCAGCGGTTCGAGTCCGCTTATCTCCA
ACTCGTGAACTTAGCCGGTACAAAGCTATATGATAGCACC
CAATTTTTCCGATTCGGTAGTTCGATCTATGATTTATCAT
TCATGGACGTTGATAAGATCCTTCCATTTAGCAGCACCTT
AGGATGGCATAGCCTTAAAGTTAAGGGCGAGGTTCAAACG
AGGAAAGGCTTACGGTGGATACCTAGGCACCCAGAGACGA
GGAAGGGCGTAGTAAGCGACGAAATGCTTCGGGGAGTTGA
AAATAAGCGTAGATCCGGAGATTCCCGAATAGGTCAACCT
TTCAAACTGCTGCTGAATCCATGGGCAGGCAAGAGACAAC
CTGGCGAACTGAAACATCTTAGTAACCAGAGGAAAAGAAA
GCAAAAGCGATTCCCGTAGTAGCGGCGAGCGAAATGGGAG
CAGCCTAAACCGTGAAAACGGGGTTGTGGGAGAGCAATAC
AAGCGTCGTGCTGCTAGGCGAAGCGGTGGAGTGCTGCACC
CTAGATGGCGAGAGTCCAGTAGCCGAAAGCATCATTAGCT
TATGCTCTGACCCGAGTAGCATGGGGCACGTGGAATCCCG
TGTGAATCAGCAAGGACCACCTTGCAAGGCTAAATACTCC
TGGGTGACCGATAGCGAAGTAGTACCGTGAGGGAAGGGTG
AAAAGAACCCCCATCGGGGAGTGAAATAGAACATGAAACC
GTAAGCTCCCAAGCAGTGGGAGGAGCCCGGGGCTCTGACC
GCGTGCCTGTTGAAGAATGAGCCGGCGACTCATAGGCAGT
GGCTTGGTTAAGGGAACCCACCGGAGCCGTAGCGAAAGCG
AGTCTTCATAGGGCAATTGTCACTGCTTATGGACCCGAAC
CTGGGTGATCTATCCATGACCAGGATGAAGCTTGGGTGAA
ACTAAGTGGAGGTCCGAACCGACTGATGTTGAAGAATCAG
CGGATGAGTTGTGGTTAGGGGTGAAATGCCACTCGAACCC
AGAGCTAGCTGGTTCTCCCCGAAATGCGTTGAGGCGCAGC
GGTTGACTGGACATCTAGGGGTAAAGCACTGTTTCGGTGC
GGGCCGCGAGAGCGGTACCAAATCGAGGCAAACTCTGAAT
ACTAGATATGACCTCAAAATAACAGGGGTCAAGGTCGGCC
AGTGAGACGATGGGGGATAAGCTTCATCGTCGAGAGGGAA
ACAGCCCGGATCACCAGCTAAGGCCCCTAAATGACCGCTC
AGTGATAAAGGAGGTAGGGGTGCAGAGACAGCCAGGAGGT
TTGCCTAGAAGCAGCCACCCTTGAAAGAGTGCGTAATAGC
TCACTGATCGAGCGCTCTTGCGCCGAAGATGAACGGGGCT
AAGCGATCTGCCGAAGCTGTGGGATGTAAAAATGCATCGG
TAGGGGAGCGTTCCGCCTTAGAGGGAAGCACCCGCGCGAG
CAGGGGTGGACGAAGCGGAAGCGAGAATGTCGGCTTGAGT
AACGCAAACATTGGTGAGAATCCAATGCCCCGAAAACCTA
AGGGTTCCTCCGCAAGGTTCGTCCACGGAGGGTGAGTCAG
GGCCTAAGATCAGGCCGAAAGGCGTAGTCGATGGACAACA
GGTGAATATTCCTGTACTACCCCTTGTTGGTCCCGAGGGA
CGGAGGAGGCTAGGTTAGCCGAAAGATGGTTATCGGTTCA
AGGACGCACGGTGTCCCTGCTTTTTCAGGGTAAGAAGGGG
TAGAGAAAATGCCTCGAGCCAATGTTCGAGTACCAGGCGC
TACGGCGTTGAAGTAACCCATGCCATACTCCCAGGAAAAG
CTCGAACGACCTTCAACAAAAGGGTACCTGTACCCGAAAC
CGACACAGGTGGGTAGGTAGAGAATACCTAGGGGCGCGAG
ACAACTCTCTCTAAGGAACTCGGCAAAATAGCCCCGTAAC
TTCGGGAGAAGGGGTGCCTCCTCACAAAGGGGGTCGCAGT
GACCAGGCCCGGGCGACTGTTTACCAAAAACACAGGTCTC
CGCAAAGTCGTAAGACCATGTATGGGGGCTGACGCCTGCC
CAGTGCCGGAAGGTCAAGGAAGTTGGTGACCTGATGACAG
GGGAGCCGGCGACCGAAGCCCCGGTGAACGGCGGCCGTAA
CTATAACGGTCCTAAGGTAGCGAAATTCCTTGTCGGGTAA
GTTCCGACCCGCACGAAAGGCGTAACGATCTGGGCACTGT
CTCGGAGAGAGGCTCGGTGAAATAGACATGTCTGTGAAGA
TGCGGACTACCTGCACCTGGACAGAAAGACCCTATGAAGC
TTCACTGTTCCCTGGGATTGGCTTTGGGCCTTTCCTGCGC
AGCTTAGGTGGAAGGCGAAGAAGGCCCCCTTCCGGGGGGG
TCCGAGCCATCAGTGAGATACCACTCTGGAAGAGCTAGAA
TTCTAACCTTGTGTCAGGACCTACGGGCCAAGGGACAGTC
TCAGGTAGACAGTTTCTATGGGGCGTAGGCCTCCCAAAAG
GTAACGGAGGCGTGCAAAGGTTTCCTCGGGCCGGACGGAG
ATTGGCCCTCGAGTGCAAAGGCAGAAGGGAGCTTGACTGC
AAGACCCACCCGTCGAGCAGGGACGAAAGTCGGCCTTAGT
GATCCGACGGTGCCGAGTGGAAGGGCCGTCGCTCAACGGA
TAAAAGTTACTCTAGGGATAACAGGCTGATCTTCCCCAAG
AGCTCACATCGACGGGAAGGTTTGGCACCTCGATGTCGGC
TCTTCGCCACCTGGGGCTGTAGTATGTTCCAAGGGTTGGG
CTGTTCGCCCATTAAAGCGGTACGTGAGCTGGGTTCAGAA
CGTCGTGAGACAGTTCGGTCCATATCCGGTGTGGGCGTTA
GAGCATTGAGAGGACCTTTCCCTAGTACGAGAGGACCGGG
AAGGACGCACCTCTGGTGTACCAGTTATCGTGCCCACGGT
AAACGCTGGGTAGCCAAGTGCGGAGCGGATAACTGCTGAA
AGCATCTAAGTAGTAAGCCCACCCCAAGATGAGTGCTCTC
CTATTCCGACTTCCCCAGAGCCTCCGGTAGCACAGCCGAG
ACAGCGACGGGTTCTCTGCCCCTGCGAGGATGGAGCGACA
GAAGTTTTGAGAATTCAAGAGAAGGTCACGGCGAGACGAG
CCGTTTATCATTACGATAGGTGTCAAGTGGAAGTGCAGTG
ATGTATGCAGCTGAGGCATCCTAACAGACCGGTAGACTTG
AACCTTGTTCCTACATGACCCGATCAATTCGATCAGGTAC
TCGCCATCTATTTTTATTGTTCAACTCTTTGACAACATGA
AAAAACCAAAAGCTCTGCCCTCCCTCTCTATCGATCCAAG
GGATGGAAGGGCGGAGGCCTTTGGTGTCCCCTCCAGTCAA
GAATTGGGGCCTCACAATCACTATCCAATATGTTTTTCTC
TCATGCCTTTCTTCGTTCATAGTTCGATATTCTGGTGTCC
TAGGCGTAGAGGAACCACACCAATCCATCCCGAACTTGGT
GGTTAAACTCTACTGCGGTGAAGATACTGTAGGGGAGGTC
CTGCGGAAAAATAGCTCGACGCCAGGATGATAAAAAGCTT
AACACCCCTCATTCTTATTACTTTTTCAATATGAAAAAAA
ATGAAAAGGTCGTCTTATCTTATTCAAAACCCCAATTATG
AAATCTCTTCTCTCCCACTTCACACCTCGGAACGCACCGT
TCTTATAGAGAGAGAGGCGCTTTCGCATCTTCTTAACCCG
AAAGGGCTGGGGAGAGGAAAGGTTCCTTTTTTAGGGTACT
CCCAGGAACAGATCCAGTGGAGACAGGGTGGGGCCTGTAG
CTCAGAGGATTAGAGCACGTGGCTACGAACCACGGTGTCG
GGGGTTCGAATCCCTCCTCGCCCACAACCGGCCAAAAAGG
GAAGGACCCCTCCCTCTGGAGGTAGGAAAATCATGATCGG
GATAGCGGATCCAAGGCTATGGAACTTGGGTGTAGGTCTT
GTGTCAAAATAGAATGGCCTCACTTTTTCTTCTTTTTATT
TCTTATTTCTTCTTGATATATATATCGTTAATGCCGGAAT
CCGTCGGACCAAATCAGCATATTTTTTTGTTTTACGCCCC
GTAACTCTTCCTCAGCCAGGCTTGGGCAGAATAGCAGAGC
AAGTATTGGTAGCATAGCAAAAATGTGTTCGTCGTCATTA
ATATGTTTGCTCGCGGTAATTGTGGCCTCTCGGCAGAATC
GATGACTGCATCTTTGATGCACTTGCTAGTACATCTGAAA
ATTCTTAATTGGCTAGTTGTAAATAGCCCCAGACTATGGA
ACAAAGGATTATACCGGACTTATCTACACCGAGGTATTGA
CGGTGATTCTCAAATATCGCAGAACAGAATGTGATATGAT
GAGATAGAATGCAATAGAAAGAAAGCCACAGGGAACGGGT
TACCTACTCTTAACGGTCAAAGCAAACCCTTTCATTCCGA
ATTCTTTAATTCGGAATGAATCAAATCTCCCCAAGTAGGA
TTCGAACCTACGACCAGTCAGTTAACAGCCGACCGCTCTA
CCACTGAGCTACTGAGGAACAACGGGAGATTAGATCTCGT
AGAGTTCAATTCCCGTTCTTAACCCATGACCAATATGAGC
TCGAAGTTTCCTTCGTAACTCCCGAAACTTCTTCGTAGTG
TCTTTGTTCCATGCCTCATTTCATAGGGAACCTCAAAGTG
GCTCTATTTCATTATATTCCATCCATATCCCAATTCCATT
CATTTAATATCCCCTTTGGTGTCATTGACATAAGAGATGT
CGTTTCTAGTCTATCTGTTTCTATTTCTATATGCTATTTC
TATATATATGGAAAGTTTCAAAATCATCATATAATAATCC
AGAAATTGCAATAGAAAAGAAAAAGGGGGTTTGTGATATG
ATTTTGAAATCTTTTATACTAGGTAATCTAGTATCCTTAT
GCATGAAGATAATCAATTCGGTCGTTATGGTCGGACTCTA
TTATGGATTTCTGACCACATTCTCCATGGGGCCCTCTTAT
CTCTTCCTTCTCCGAGCTCGGGTTAGAGAAGAAGGAGAAG
[truncated: 751 more rows]
