# Supplementary material for: Resolving Recalcitrant Clades in the Pantropical Ochnaceae: Insights From Comparative Phylogenomics of Plastome and Nuclear Genomic Data Derived From Targeted Sequencing
Source: Front Plant Sci. 2021 Feb 4;12:638650. doi: 10.3389/fpls.2021.638650 (PMC7890083; doi:10.3389/fpls.2021.638650)
Supplement: Supplementary Data 3 — DNA sequence alignment of dataset 2. [file Data_Sheet_3.FASTA]

>2_Aden_bica
---------------------------------------------------------ATAGAAAAGAACTGTCT------
-------------TTTCTTTATACTTTCG-CCGGTTCCGTTGCTACCGCGTGCTTTACGCAATCGATCGGATCATATAGA
TATCCCTTCAACACAACATAGGTCGTCGAAAGGATCTCGGAGACCCACCAAAGCACGA---------AAGCCAGGATCTT
TCAGAAAATGGATTCCTATTCGAAGAGTG-------------CATAACCGCATGGATAAGCTCACACTAACCCGTCAATT
-------TGGGATCCAATTCG---------GGATTTTCCTTGGGAGGTGTCGGGAAAGAATTGGAATGTAATAAT-----
------TATCGATTCATACAGATATAGAAGAAAAGG--------------------------------------------
-----------------------------------------------------------------------TTCCAAAAG
AGGAAAAACCTGAAGATTTCATATAGTACTTTTGATCAAAAAATCAATCTGATTTA----------TTTCGTACCCCTCG
CTCAATGAGAAAATGGGTCAGATTC-ACAGGATCAAACCTATGGGACTTAAGGAATGACGGAAGGGAAT-AAAAAAGAAA
TAAATAAAAATGAAGTAGAAGAGCCCAGATTCCAAATGAACAA-------------------------------------
------------------------------------------------------------AGATCGTGATTGGATCCACA
TATGTTTGG------T---------------------------------AAAAAGAAGAATCTTCTCCTTTGAGAATAAT
CAAAAAAGGAAA--GTGTTCAATTGGAACATGAAAACGTGACTAAATTTGTCCTAGTTACTCTTCGGGACGGAGTGGATG
AAGGGAGGAGCTTCTCGAACGAGGAAAGGGATCCAATGACTTTGAAAGAATTGAACGAGGAGCCGTATGAGGTGAAAATC
TCATGTACGGTTCTGTAGAGTGGCAGTAAGGGTGACTTATCTGTCAACTTTTCCACTATTACCCCCAAAAAACCAAACTC
TGCCTTACGTAAAGTTGCCARAGTACGATTAACCTCGGGATTTGAAATCACTGCTTATATACCTGGTATTGG--------
--------------------------------------------------------------------------------
--CCTAGATGCTGTCGGAGTAAAGGATCGTCAACAAGGGCGTTCTAGTGCGTTGTAGATTCTTATCCAAGACTTGTATCA
TTTGATGATGC-CATGTGAATCGCTA--GAAACATGTAAAGTGTACGGCTAACCCAATAACGAAAGTTTCGTAAGGGGAC
TGGAGCAGGCTA-CCATGAGACAAAAGATCTTCTTTACTAAAGAGATTCGATTCGGAACTCTTATATGTCCAAGGTCCAA
TATTGGAAGAATTTCAGAGGTTTTCCTTGACTTTGTCCGTGTCAACAAACAATTCGAAATGCCTCGACTTTTTTAGAGCA
GGTCCGAGTCAAATAGCAATGATTCAAAGCACTTCTTTTTACACTATTTCGGAAACCCAAGGACTCCATCGTATGGATAT
GTAAAATACAGGATTTCCAATCCTAGCAGGAAAAGGAGGGAAACGGATACTCAATTTAAAGTGAGTAAACAGAATTCCAT
ACTCGATCTCATAGATACATATAGAATTCTGTGGAAAGCCGTATTCGATGAAAGTCGTATGTACGGCTTGGAGGGAGGTC
TTT---------CGAGATCCACCCTACAATATGGGGTCAAAAAGCCAAAATAAATGATTTTATTAGCCCTTATAAAAGGA
AAACTGATTCTTG---AGAACCCCTTGTACGCTCATGTCACGTCGAGGTACTGCAGAAGAAAAAACTGCAAAATCCGATC
CAATTTATCGTAATCGATTAG--------TTGGTTAACCGTATTCTGAAACACGGAAAAAAATCATTGGCTTATCAAATT
ATCTATCGAGCCATGAAAAAGATTCAACAAAAGACAGAAACAAATCCACTATCTCTTTTACGTCAAGCAATACGTGGAGC
AACTCCCGATATAGCAGTAAAAGCAAGACGTGTAGGCGGATCGACTCATCAAGTTCCCATTGAAATAGGATCCACACAAG
GAAAAGCACTTGCCATTCGTTGGTTATTAGGGGCATCCCGAAAACGTCCGGGCCGAAATATGGCTTTCAAATTAAGTTCC
GAATTAGTGGATGCTGCCAAAGGGAGTGGCGATGCCATACGCAAAAAGGAAGAGACTCATAGAATGGCAGAGGCAAATAG
AGCTTTTGCGCATTTTCGTTAATCCATGAACAGGATCTATATAGAC-----TCATGGAGCCATACATCTCGAT-------
-CGGAAAAGAATCAATAGAAAAAGAAAGAATCGGAATTGATCGCTATATTTCTCGAAACAAACGAAAAGGAAATGAAAGA
TGAAAGATAAATCATGGATCAATTAAGCCCTCTCGGGGACTTGCTTAAG-----AATAAAAA-AA-GGTAAATACCATGG
AATAAGGTTTGATCCTCTTTATGGGGATTCCGTAAATATTCCATTCC---------AAAAAAAAGAGAAAGTTCGAAACA
ATTGGGATTT-TTTGGAGATTGGATGCAGTTACTAATTCATGATCTGGCATGTACAGAATGAAAACTTCATTCTCAATTC
TACGAGAATTTTTATGAAAGCCTTTCATTTGCTTCTCTTCGATGGAAGTTTTATTTTCCCAGAATGTATCCTAATTTTTG
GCCTAATTCTTCTTCTGATG-ATCGATTCAACTTCTGATCAAAAAGATATACCTTGGTTATATTTCATCTCTTCAACAAG
TTTAGTAATGAGTATAACGGCACTATTGTTCCGATGGAGAGAAGAACCTATGATTAGCTTTTCGGGAAATTTCCAAACGA
ACAATTTCAACGAAATATTTCAATTTCTTATTTTACTATGTTC-------------------------------------
--------------------------------------------------------AGGAATGTTTTTATGCGGTGCTAA
CGATTTAATAACTATCTTTGTAGCTCCAGAATGTTTCAGTTTATGCTCCTACCTATTATCTGGATATACCAAGAAAGATG
TACGGT----------------------TTTACTCATGGGTGGGGCAAGCTCTTCTATTCTGGTTCATGGTTTCTCTTGG
CTATATGGTTCGTCCGGGGGAGAGATCGAGCTTCAAGAAATAGTGAATGGTCTTATCAATACACAAATGTATAACTCCCC
AGGAATTTCAATTGCGCTTATATTCATCACTGTAGGAATTGGGTTCAAGCTTTCCCTAGCCCCTTTTCATCAATGGACTC
CTGACGTATACGAAGGAGTGCGGTTCGTTCGAAAAATTCCTACTTCTCT--ATCTATCTCTGAGATGCTTGGATTTTTCA
AAACTCCATGGACATGCAGAAGAGAAATGCTATCCGCACTCGGACCAAGACATAACTTTTACTTGTTCAAATAACAATTA
AGGTGAAGCAGCGTCAGGAACAACGAATCTTA-------------GATTCATTTTGCAAGTTCGTTATTACGGGTAGCTC
CTA-CAAAAGATCGGACTAATGACGTATACAATATTTAAATTCTCGATG-TAGATGCTACATAGTTGGTTCTCATCCTTC
AGAGACTACAAGTGTAATAGGAGCATCCGTCGACAAAAGGATCACCCTAAGA----------------------AACGAA
TCAAATCAGATGGTTCTATTTCTCAATCTTTTCGA----------CCTCTT-----GGTTCCGTAGG-------------
-----------TCAGAAAGATTGAGAAAAAT--------TACAA--------CCACTGATG----------AAGG-----
-----ATTCCTCGAAAAGTTAAGGATTAGTCATCCTTT------TTAGAAATCGAATGGATTCGGTCTTATACATACGCG
AGGAAGGTAATCAAAAAAGAAAGWAGATGAGTTCTTCTTTC-TTTTATCACTTAGGAGTCGTGCGAGATGAAAGTCTCAT
GCACGGTTTTGAATGAGAGAAAGAAGTGAGGAATTCTCTTTTCGACTCTGACTCTCCCACTCCAGTCGTTGCTTTTCTTT
ATGTTACTTCGAAAGTAGCT--------------------AATTTTCGATAATCCTTTTTATTTCTCATCAAACGAATGG
CATCTTCTTCTGGAAATCCTAGCTATTCTGAGCATGATAGTGGGGAATCTCATTGCTATTACTCAAACAAGCATGAAACG
TATGCTTGCATATTCGTCCATAGGTCAAATCGGATATGTAATTATTGGAATAATTGTTGGAGACTCAAA-----------
-------------------------------CTCCATGAATCTAGGAACTTTTGCTTGCATTGTATTATTTGGTCTACGT
ACCGGAACTGATAACATTCGAGATTATGCAGGATTATACACGAAAGATCC-TTTTTTGGCTCTCTCTTTAGCCCTATGTC
TCTTATCCCTAGGAGGTCTTCCTCCACTAGCAGGTTTTTTCGGAAAACTCCATTTATTCTGGTGTGGATGGCAGGCAGGC
CTATATTTCTTGGTTTCAATAGGACTCCTTACGAGCGTTCTTTCTATCTACTATTATCTAAAATTAATCAAGTTATTAAT
GACTGGAYGAAACCAAGAAATAACCCCTCACGTGCGAAATTATAGAAGATCCCCTTTAAGATCAAACAATTCCATCGAAT
TGAGTATGA------------------------------------CAATGAACCCGATTATTGAAATTGCTCAAGATACC
CTTTTTTAGCTTCTAGAACCTATTTCTTAGTTCAAGATCCCTCTTACTAACTGGAATCAAAGAATTAGTAGATCTGTTCC
G-CCCAAAA----------------------------------ATAATCGAGTCGATTCCAGGATTATAAGTTCATTCCA
TACCGGACCAGA------------------CCGGAATAGGCT--TATATACATTCTCATTATGAGAAGG--------G--
------------------GT--------------------CATTCGAGCGTA----------------------------
--------------------------------------------------------------------------------
CGTCGTTACATTCCATTTAGGATTAGGAATAGGYG-----------------------TATATCTCTCCTTA-----TTT
GGGACCCTATTCTATTCACCTCTTTGGGCGTCTATTGA------------------------------------------
--------------------------------------------------------------------------------
--------------------------------ATAGGCA---------------TGTTCCGGATAATTYAAATC------
-----------GACTCGGGCCT-------ATATG--------ACATGAACGATCAATAGAAATACTCCAACACTCCACCT
-------------------------ACATCACACTAGATAGATATCATATTCATGGAATACGATTCACTTTCAAGATGCC
TTGGTGGTGAAATGGTAGACACGCGAGACTCAAAATCTCGTGCTAAAGAGCGTGGAGGTTCGAGTCCTCTTCAAGGCATA
ATATTGAGATC---------TCTTATTGAATTGG------AATAAGTTCGGCAGTGGATC-----ACGAAATCTTGATGA
TCTTCTCTATCTAAT--GAATGGGGAGTCCGCTTTGA---AATCGTTCGCCCTGCAAC----------------------
--------------------------------------------------------------------------------
--------------------------------------------------------------------------------
-----------------------------------------------------CA-CCCCCGAG-TATATGCTTCAACAG
GAATTACACAAGAGTAGATTGATACAATAGAAACCTCTGATA-----AAATG------CCCGCCCGTCACCCAACAGATA
AAGTACATTACATAGTCCGTTTTAGGGATTGGCGAC------------TTACCC---------ATTC-------------
---------AGTGACTTTGGCACTGGATGGT-CCCA---AAAAA---------AATGGGTACTAT-CGGGTCGGGTGAAT
TCAATAATAGGCGTCTGTTGGCATTCCATCCTTCCTTCTCCTTTCAGGGACTATCCGAAAGAGAATCCAGTACTTCTTGG
TC-------GTGAATATCTGAATAGGACGAACCGCCCCGTGGATATCTTTGCTTCGGAACAAAACAAT-TAGAATTAGGC
CCGGTCAACT---------------GGAATGTGTATTATCCATATAGGGGAT--------------------------AT
CCATCGACCTG-------AGACGAAG------------ARAAGGTTCTATCTATT--TTATTTA----------------
--------------------------TCGTTATTGGAGCAGATAGCAAGAACCATCATTTCATCCGACATACGTATTTTT
GATTTTCCAATGGATTTACATCTTTCATTAATG-----------------------------CTCTGGTTGCTYGTTGTT
CAA-GAATTCTTGTTTAGGCAGTTCATACCATCCATACATAGTGTTTTGATCTAAGATTTCAATTCTTCCATGTTTCAGC
AGTAACAT-----ATTCTTCCATGTCCAAAATATGGAAGAAAAAGGTCTT--------------------------TCAA
TTCTGTTCCACTTAATCC-CTATTTCATGGCCACATATCTTTCATGCTAAGGAATGGKAAACCTTTC-TCCTATT----A
CATGAATCCAATTTCATCCGGGAAAAGCCATCTTTTTCTCAACAATGCCGTTGTCATTTGATCCAATAGCGTTCCGTTAG
ATAGGAACAGATTTGATAAATACTGATAACTCTCGGATAGAGTATTAGAACGGAAAAATCCATTAGATAA----------
--------------------------------------------------------------------------------
--------------TGGTTTGGGAAGTAAGAAGCCCCTTTGACATCTCTTCATCTGCAAAGAATTCTCAATGTGAAAACA
CAGAGACAAAGGGCGGATCTTTGAATAGGAAAAAGAGTGGATCCGCCGGGTCCCAAATGAATTGGYTTATTCGAAAAAAG
CCTTGTTCTTTGGAAGATCTATCTCC--------------------------------ATTCCGAATCATTCTCTTGAAG
CTCATCCTCTTCATTATAAATGATCCGCTTGTCCCGAAATGACCTGGCCCAATAGGGAAATCCCAATTC-----------
--------------------------GGGCGCCATATTCTAGGAGCCCAAACTA-------TGTGATTGAATAAAACCTC
CTCTATC-------TGTTGTG------GATCGAGGACTCCTTCTCCTTCCCCTTCTTCAAACTCCGATTCG------TAT
TTTTCATAGAGAAAT------CTCTGATCAAGGATAGAACAAGATCC------ATTTTGCATCATATCTAAGGGACTCCT
TGGTTCGAGCCGAAGAAGCAATGTCACTCGATCATTATCAARYCG-----------------------------------
--------------------------------------GAATCATTTTCAACAAGTCCATAATAAGTGATCCCATTTTTT
TCATCGGGTCCGGGTAGAGACCAAAGGTCTTGAGCAACCGATCCGGCAGAACAACTCAAAAGATAAAGAAGTATCGTCAA
TTTCTTCAGGCTCGTTCCAAGTTCGAAGTACCATTTGTACAAATAAGAATCCCCTTCATTA-----TTTCTTCTTCATAT
AGATAGATATAGGATCTATGGGGCAATTACTTAGAAATACATTTTGTGCAACAGCCCTTCCTATCTGATAGAAAAGGATC
CCATGATCCTGAA----------------TCGCAAATCCCAAGTTTGTCTATGAAGAGCAGATCTAATTAGATTAGTGTC
TATAATTGATTTCTTCTGTGTAATACTAATTGATAGGGCCTCATTGGTAAGTGCTACAAGATCTCGTACATT--------
-----------------CCATTAGTATGGAACATTTTTTTTTCCAAGTGAAATCCCCTAGTATATGAAAGAGTGAAAAAG
TGCTTTCGTTGTTGTGGAATAAGAAGCCTTCGTATCTTAATGCATGTATTTAATTTA------------------GGATC
CACTTTTTGGGGAATATGAGTCGAAGCAATAACAAGAATATCTCTAGTGG-AACATCTTTCACA-TCCCTGGAGAGATAG
TTCACTAATAGACCACGGGATAAGTAATTCGACTCATTCACATCCAGATCATGAATGTTTGGAATCCATATTATGCAAGG
AGACATTGCTTTTGCTAATTCGAATTGAAGGGTGATAT------AAAATCGGTCTATTTCCGGCATCATATCCATAGTTA
GCGCATTCATCCTAGTTAGAAGCTCCAGCTCCGTATCAAGGTCACGGTCGAGATCGTCACTCACATCAATATCGTCACTA
TCATCAATAAGAAAACCCTTAGGCT-TGTTATCCAGGAACTTGTTAAGAAATACTGTAATGAAAGGAACATAGGAGTTTG
TCGCTAGGTATTTGACCAAATAGGATCGTCCAGTTCCTATAGAACCTATCACTAAAATACCCCTAGAGGGGGATAGGGCT
AAGCGGAGCGAAAAGGGTTTTCCATGAGATGGGAAATGAAAACTATTCGCCCCACACGAGGTTTGTGAATAAGTGATTGT
CTGATAATGAGCAAGGAATATCCGTCTTTCGGCTAAACAGGGTGTATTGAACTCATAATTCATTAGATACTTTTTATGAA
TGTCAACTAAGTATCGTAAGTAAATTGCTCCCGGCTCTTCAATCATTTGATAACCAGAGTCATTCTTTGATAAATGATCA
CTATGAGTCAGACTCAATAGAATTTGATCAATCC-TTTTTTCTGTCGTTAAGGTGGAGAACTGAACCAAGAATTCTCTTT
CTTTATCATCAATTGAATCACTGTTCGCGACCAAGGATTCTATTTTATCATCAATCCAATCACCGTTCACGTTTTTTCTT
TTTCTTATCAATGAATAAATCTCTTTACTTCTATGACTTAGATGTCTCGTATTTCTCGAAAAAGTGATTCGATTGATGGG
AT-TTGGTATG----------------TGAGATTGATATTCAAAAATTTCTTCTTAGAACGTATTGATTT----------
----GACCACCACCCCATAGCATGTTGACGCCAGAAGCAG--------------------------TCTAATTGTTCCAG
AGCAACTAGAAAGAGATTCTTTAACCAGAAAGAATTCAGTTCAGATGTAGGATACCTATCCAGAAGTTTTCGCAACTCAA
TCATGTATGCTGGAATCATCAAAGATTTGACCTTTTCGAACTCTGTCTGTAACTCACTAGAGGCTCGGGAAA--------
-CAAAGAGAAGATGTGTACGAACGAGATATCCAGCAACAAGAAGAAGGAAAAGGATTGAATAGAGGAACTCCC-------
---GAACGTTTGGCGATCTCAGATGTGTCGATATCAATGGTGACTCATTATTTCGATGAATCATTTCTTCGGACAGAAGA
AGATTATGTAAACACTTACTGGAAATCTCGCKTATCAGATTCCATTGTGGAAGACACAATTTTT----------------
----------------------------------ATGGATACAAATTTTTGACTGCTACTTAGTATCGGTAATAGATCTG
AAAAGGTATCTAAAAATATCAAATTTAGATATTTGTACCCTGTCGAAGTAAGGAACCATGGCA---------TATATGTT
TGGA-----------------AGAGTTGAAAAAGCACTATCTCGTTGAAAAGTTCTATACATCTGCCCTTTTTCAACGCA
TTTCTTTAGACAAAGACT--CCGTTTTTTCCTCTTTTCGGATGGTAAATCTT---------TCTCAGAACATGGAGTGTG
AATCAAACCCATGTTTGAATTGAAATTGAGATACTGATGCAAGTTCTTCCCTTCTGAATCAGATAGATTCATATCCGAAA
GAGGTTGACAATAA---------------------------------------ATTCCAGAAATGTCTGCGATCGAATAA
ATAGCTCTACGAACGAATGGATC------------------------------------------------------TCG
TGGAAAATCATTAGGTATGAATATGTTAGATACCTGTGACTCGATTGGTGAAATAGTATCTTTCTCCAAAAA------AG
CATGTTTTTTTTTTACCGCCGCACAAAGACAAAGCGAATATTTTGTTGCGAATGAAC-AAGATATTGAGGAATTGTC-CA
T---------------------------------------------------------------------GCAGAAGTGA
TGTAGATTATTCAAGAATCAAAGTCAATTCACTTTACAAAAAGAAGATATCAATGAACTTCTATGAAATGGTTTTAYGGG
ATTYAGCCAATGGTCTTGATCGTGGGATATCA---------TTGAGAAA-------CCGTGTT-----------------
--------ATCAAAAGATTTCCTGYGATTAWT--TCTAGTATGGAATGAGTCAATCATCCACTTTGGTATCTTATTGAAC
AAAAATGGTGATATTGTTCCTCCATTG---------ATCAAAAAT-------------TTCGAT-TTTTGGGAAGTATCA
-----------TGATCATCCAATAAGAA----------------------------------------------------
--------------------------------------------------------------CT----------------
--------------------------------------------------------------------------------
----------------------TAGGTGAAC----ATCAATGGTTTCGAGGTCATACTCCAATCTCTTGGATCTTGCATC
TGGTGATATTCCAACATTTAGTAAGGAAAGGAAGAGGTTGCCTCGAGTTGCAACTGTTACCGGGGTTTTGTCTGAGCTGG
ATGATGAGACCAGCAATAGTGTTGGCTCGGATGCTCCTTCATCTGTGTCTCAAGAGCGGATTATCATTGTGGGTAACCAA
CTTCCCCTTCGGTCCCATAAAAGTCCAGACGGCAGTGGAGAGTGGTGTTTTTCCTGGGA--TGAGGACTCACTTCTTTTA
CAACTAAAAGATGGCCTTGGGGATGACGTTGAAGTCATCTATGTTGGTTGTCTCAAAGAAGAGGTTGATCTTGATGAGCA
AGATGACGTAGCCCAAATGTTGCTCGAAACTTTCAAATGTGTTCCTGCATTTATCCCACCTGACCTCTTCACTAAGTTCT
ATCATGGCTTCTGCAAGCAGCAACTGTGGCCTTTATTTCATTACATGCTTCCTCTGTCACCCGATCTTGGTGGCCGCTTT
GACAGGTCCCTCTGGCAGGCTTATGTTTCTGTGAACAAGATATTTGCAGACAAAGTAATGGAAGTGATCAGTCCAGATGA
TGATTATGTG----------------------TGGGTTCATGACTACCATCTCATGGTTTTGCCAACTTAC---------
-------------TTGAGAAAAARR-------------------------------------------------------
---------------A----------------------------------------------------------------
--------------------------------------------------------------------------------
--------------------------------------------------------------------------------
--------------------------------------------------------------------------------
--------------------------------------------------------------------------------
------------------------------------------------------------A-------------------
-----------------------------AAGAAT---------------------------------------------
--------------------------------------------------------------------------------
--------------TWTTGTTTTTTGCT---------------------TT-----------------------------
--------------------------ACCAAG-TAA--------------------------GGTATACCA------AGA
AAAGCC----------TA----TTGATAATGTTACCAACGAAAGGTGTCAAAG---------------------------
-------------------------ATCC---------------------------------------------------
--------------------------------------------------------------------------------
--------------------------------------------------------------------------------
------------TAGGTATTCCAAAGA-------CAAAGGAGTATCACTAACTT--------------------------
---------------------TTTGATTG---------------------------------------------------
-------------------------------------------------CCGAAAGGAAAGGAGGAA-------------
--------AATTCATATGGAATTGACCTACGAAGAGTTATGAAGAAGATTTAGYTTGTTTAGACAAGATTAGAAAA----
-----AATTGAATTTATTGAAATGCGC-TTTTTTGTTTCAGCTTTAT---------------------------------
--------------------------GCTCGGCCCTGAATGATTCCAGTGAGCAGAC--TTTTTTTTTGTTTT-------
TCAATG-AATC------AAGCACGGC----TAG-TTACAAAAAA--------CAAAGAATACAATAATGAA-------GA
ACT------------------GAAAACTATAAACTATACAA-----TTTTG------TTTTTCA-----TTTTTTTAG--
---------CTCGAACCGTAGACCTTCTCGGTAAAACAGGTCAAACTTTTTATTATCAAAATGATTCGAACTGTTTCAAA
GACCCAACATGCATTTTTTGTTTTTTGCATTGAGCTCTTTCATTAACTG-ATATAAATAATTGGTTAGTCTACCATAGTT
CTCTTGACAGAAAGATA------------------------------ATGGATTCCGATCTGAGAGCACTACCAAAGTGT
TTCAAAG-AAGGATTATCCTGACGTAGGTTTGCTTTTGGCTTAGA-----------TCAACCTAAGTTAAATGGA-----
------GTCTCCAT---CG-CCCCGCTTCT--------AGTTAAAG-AATCAAA-----------TA-------TGAAAC
TTTATACAC---------CTTAAAGTTCATAG-----GGATAGGACGAAAAGAGAATTTTT-TGAA------ATCCTTAT
ACTCA----GCCTAGCATTGAATAGACTSRATATTTACCTTATCAA-----CATCTTA-----AATCAATA-A------T
GGCCTCTTTTGAGTGCTG---AAAAGAGCACTTAAATTAAACCGAA-----TCTTTTGTCAGGCTATTGTT---CTCTTG
TTCTCTWGTTCTCT------AACGGAGT--------AAGACATCAACTTCTCAATAAGTCTT-------TTAATTATATG
AT----ATACTTCTTTG----AAAA-AAAAACATTGACGCGCGTGTAAACGAGGTGCTCTACCTAACTGAGCTATAGCCC
TTGTA-------TTTGTGATACACATTTTATCATGTTGATAATTTCTTGGCAAGATAA----AGAGTAGAAGGGCTAACA
TCCCATTTCTTTGATCTAGTTGTT--------------------------------------------------------
----------------------------------------------------------------TTGCTTTCATACGGCG
GGAGTCATTGGTTCAAATCCAATAGTAGGTAGAACTTATTAGATACCAAAATCAATGGTATCTAATAAGTTTTGCTACCC
ATC-------TTTTTT-AT--------------TTGATTTATTTTTGA-----TCTTTTCCATTCCAGTCTATTTCATTT
T----------TGAATTGAAAAATTTTTCGTTGTATTAGAATCTGATTTCACTTATG-----ATTCTAGTCAATTGGCAG
AAAAAAAA-AAANTAGCTATATAAACGAAATTTCTGTTTATACAG-AAGTTATTTTGATTATTCGGACACAC--------
---TAACTAGTT-A---TAGTTACAAAATCAGATTGATAGCCTCTGCTCGTGCCTTAGCCCGTCTGAGAGCCAGATTGGC
CTCAATTATTTGTCTCTTTCCTTCAGCTTTCCTCAAGTTTGCTTCAGCTATTTCAAGAGTTTGC----------------
----------------------------------AAAYAGTAATCTCATTATTGCCTATTCTAGCAAAACCACCCATCAG
AGCCATCGTTAACCATTCGTCGTTAAGGCGTATTCTCAAAATACCGATATCAACAGCAGTGGCAATAGGCGCGTGATTTG
GTAATACGCCAATTTGTCCGCTATTAGTAGATAAAATGATTTCTTTAACTTCTGAATCCCAAACAATTCGATTCGGGGTC
AGTACACAAAGATTTAAGGTCATTTCTTCAAGTTGTTC-------TCCATTTCTAAATTCGTAGCCTTCGCAGTAGCTTC
ATCAATGTTACCTACCAAATAAAAGGCCTGTTCGGGAAGACCATCTAATTCTCCGGAAAGGATCAATTTAAATCCTCTAA
TTGTTTCCACCAGACCGACATATTTTCCCGGAGAACCGGTAAATACTTCTGCTACAAAAAAAGGTTGTGA-TAAGAAACG
TTCAATTTTTCGCGCTCTTGCTACAGTTAAGCGATCCTCTTCAGATAATTCGTCCA-ACCCAAGGATAGCTATAATGTCC
TGAAGTTCTTTGTAACGTTGTAAAGTTTGCTTAACTCTTTGYGCAGTTTCATAATGTTCCTCACCAACGATTTGAGGTTG
GAGCGTAGTTGAGGT-----------------------------------------------------------CAGTAG
TAGCATCTAAATGCGCAAATGTAGTGGCAGGAGCAGGGTCAGTCAAATCGTCCGCAGGTACATAAACTGCTTGAATAGAG
GTTATGGATCCCTCTTTGGTAGAAGTAATTCTTTCTTGTAAAGAACC--------------AGGGTAGGTTGATAACCAA
CAGCAGAAGGCATTCTACCCAATAAGGCGGATACTTCTGA--------GGACGAAACGGAAGATATTGTCGATAAATAGA
AGCACGTCTTGTTCATTAACATCTCGGAAGTATTCCGCCATAGTTAGGGCAGTCAAACCAACTCTCATACGAGCTCCCGG
CGGTTCAT--------------------------------------------------------ACTCCAGATTCTTTCA
TTTCCATGTAAAGATCATTTCCTTCACGAGTACGTTCTCCTACTCCGCCAAATACAGATACACCCCCGTGAGCTTTCGCA
ATGTTGTTGATTAATTCCATAATTAGTACTGTTTTCCCCACTCCAGCCCCCCCGAATAGTCCGATTTTTCCTCCACGGCG
ATAAGGGGCTAAAAGATCTACTACTWWMATTCCGGTTTCAAAAATAGATAATTTTGTATCTAACTGTATAAA---GGCAG
GCGMAGATCTATGAATAGGGGATGTTGTG-CGAGTATCTACAGGACCTAAATCATCAACAGGTTCTCCAAGCACATTGAA
AATTCGTCCTAGAGTCGCCCCACYGACTGGAACACTTAGAGGAGCTCCTGTGTCAATCACTTCTATTCCTCTCATTAAAC
CATCTGTAGCACTCATAGCGACAGCGCGAACTCGATTATTTCCTAATAATTGCTGTACTTCACAAGTCACATTAAGTTGT
TGACCGGCAGTATCTCGACCCTTAACTACCAGTGCGTTGTAAATATTAGGCATCTTGCCCGG-GGGAAAAATTACATCTA
GCAMCGGGCCAATGATTTGAGCGATACGTCCCAGGTTCTTTTTTT-CAAGCGTGGAAACTCCAAGGCTAGAAGTAGTAGG
ATTGATTCTCATAATAATATAAAAACGTGTCGAAAT---------------TTTTTTTTCGAAGATTTTCCAGTCC-AAA
AGAAATGTTCGATAGCAAGTTGATCAATTAATTC------AA--------------------TTAAGAAGTGGGAG----
--------------------------------------------------------------------------------
--------------------------------------------------------------------------------
-------------------------------------------------------TATATTAAGTGTATGAAT-----AA
--------------AAAGGGCTTCGGGAAG--------------------------------------------------
-------------------------------------------------TTCATAATTTCTATCTTATGGCTCC----TT
TTTTCTTATTTAAACAGATCTAGTTACGCCTAGTT-ATTA----------------------------------------
-----------------------------------------------------------------------TTTTTT---
--------------------------------------------------------------------------------
------------------------------------------------TCTAATG-------TCTAAT------AACGAA
ATTATGATTAGTTGATA-----A-TA-TTGATTAATAACTTTGTGAACGATTCCTGTG-AAAG------G-----GTTCA
TTCACTCCTACTTCATGTCGAGTAGACCTTGTTGCTGTGAGAATTCTTAATTCATGAGTTGTAGGGAGGGACATATGTCA
CCACAAA-------------------------------------------------------------------------
--------------------------------TTCGAGTAACTCCTCAACCTGGAGTTCCGCCCGAAGAAGCAGGCGCTG
CGGTAGCC---------------------------ACTGTGTGGACCGATGGGCTTACTAGTATTGATCGTTATAAAGGA
CGATGCTACGACCTCGAGCCCGTTGCTGGAGAASAAAATCAATATATTGCTT----------------------------
-------------------------------------GGTAATGTATTTGGGTTCAAAGCCCTACGCGCTCTACGTCTGG
AGGATTTGCGAATTCCTCCTGCTTATTCTAAAACTTTCCAGGGACCACCCCATGGTATCCAAGTTGAGAGAGATAAATTG
AACAAGTATGGT------------------------------------------------------------------TG
TTTATGTATGTCTCTGTGGTGGACTTGATTTTACCAAAGATGATGAGAATGTGAACTCCCAACCGTTTATGCRTTGGAGA
GACCRTTTCCTTTTTTGTGCCGAAGCAATTTATAAAGCACAGGCAGAAACGGGTGAAATCAAAGGACATTATTTGAATGC
TACTGCGGGTACATGCGAAGAAATGATCAAAA------------------------------------------------
-----------------ACTGCAAATACTAGCTTGGCTCATTATTGCCGAGATAATGGTTTACTTCTTCACATCCATCGC
GCAATGCATGCAGTTATTGATAGACAGAAGAATCATGGTATACACTTCC-----------------TTACGTCTGTCTGG
TGGAGATCATATTCACTCTGGTACCGTAGTAGGTAAACTTGAGGGGGAAAGAGACATCACTTTGGGCTTTGTTGATTTAC
TGCGCGATGATTTTACTGAAAAAGATCGAAGTCGCGGTATTTATTTCACTCAAAATTGGGTCTCTCTACCARGTGTTATA
CCCGTGGCTTCAGGGGGTATTCACGTTTGGCATATGCCTGCTCTGACCGAGATCTTTGGAGATGATTCCGTACTACAATT
TGGTGGAGGAACTT-TAGGG------------------------------------------------------------
-----------------------------------------GGGGGTTATACGCGAGGCTAGCAAATGGAGTCCTGAACT
AGCTGCTGCTTGTGAAGTATGGAAGGAGA---------------------------------------------------
-------------------------------------T------------------------------------------
--------------------------------------------------------------------------------
-------TAAAC--------------------------------------------------------------------
--------------------------------------------------------------------------------
--------------------------------------------------------------------------------
--------------------------------------------------------------------------------
--------------------------TCAAATCTTTCTATTCTTGTCTTGGATTCACACTTAATCCTAAGGATCTATAGG
ATTGATGTATTC-------TTTTATA-------TTT--------------------------------------------
--------------------------------------------------------------------------------
-------------------------------------------AA-----------------------------------
--------------------------------------------------------------------------------
--------------------------------------------------------------------------------
--------------------------------------------------------------------------------
--------------------------------------------------------------------------------
--------------------------------------------------------------------------------
--------------------------------------------------------------------------------
--------------------------------------------------------------------------------
-----TA---ATGGAAACAAAGGGG-----------------GTTCCATCATAATCTTCTTT--TTTCCCACCCCTA-A-
----------ATTTATT-CAATACCCAGTTAATAATCCTAGTGTTTGGATCTATATGCTTATTC----------------
---------TRAGAGGA-------------AATATTC-AAATGA---TTTTTTTTTCATCGAATGACTATTCATC-----
--------TA---TTTATTTTGATATAA-ATAGCA-GCAAGAAAG-----------------------------------
--------------------------------------------------------------------------------
--------------------------------------------------------------------------------
-------AGATAAAAACACCCATAATTGGAGTAATA--GTGAGAGTTCTAGT----------------------------
--------------------------AGATGACACTTTTTTTGTTAGGGATAGTAATAGGAACAGT--------------
--------------------------------------------------------------------------------
-------------------------------------------------------ATGATCATTATATG------TATGA
TACTAAATATAG--TTGGAAAAATTACATCAATAGTTGCATTGACTGTTATCT---------------------------
---------TGCTAGTGACAATTACACCGAAAATTAYATTTATAGTTCCATTTGTGGTGAACGTGGAAATCGGGGTGAAA
ATGAGAGTTCCGGTCT------AAGAAGAAAAACGAATGACATCGATTTAACTAGAAAA-GAAAGTTCTAATGATCTCGA
TGTCACTCAAAAATACAGA-------------------------------------------------------------
--------------------------------------------------------------------------------
---------------------------------------------------------------AGGAGGAACCTTATAAA
GATCGTATTGATTCTTATCAAAGAAAGACAGGATTAACCGAGGCTGTTCAAACAGGCACAGGTCAACTAAACAGAATTCC
CGTAGCAATTGGGGTTATGGATTTCCAGTTTATGGGGGGTAGTATGGGATCCGTAGTAGGTGAGAAAATTACTCGTTTGA
TCGAGTATGCTAGCAATCAATTTTTACCTCTTATTCTAGTTTGCGCTTCCGGAGGAGCTCGTATGCAAGAGGGAAGTTTG
AGTTTGATGCAAATGGCTAAAATTTCTTCCACTTTATATTATTATCAATCGAATAAAAAGTTATTTTGTGTATCAATCCT
TACATC------------TGGGGTGACAGCTAGTTTTGGTATGTTGGGAGATATCA------CTGAACCCAATGCTTACA
TTGCCTTTGCGGGTAAAAGAGTAATTG-----------------------CCTGAAGGTTCCCAAGCGGCTGAATTTTTA
TTCCATAAAGGTTTATTCGATCTA--------------------------------------------------------
-TTTTT--------------------------------------------------------------------------
---------------------TTA--------------------------------------------------------
------------------------------------------------------------------------A-------
--------------------------------------------------------------------------------
--------------------------------------------------------------------------------
--------------------------------------------------------------------------------
--------------------------------------------------------------------------------
--------------------------------------------------------------------------------
--------------------------------------------------------------------------------
--------------------------------------------------------------------------------
--------------------------------------------------------------------------------
--------------------------------------------------------------------------------
----------------------------GAAAAAGATAATAA--AAGAACAATGAGAACTAAGTGGGT------------
--------------------------------------------------------------------------------
--------------------------------------------------------------------------------
--------------------------------------------------------------------------------
------------------------------------------------------AGATTA-------------AT-AAAA
AATAAGTACAAATTTTAAATCGAGGTG-CCCATTTTATGACAATTCTCAACAACTTACCCTCTATTTTTGTGCCTTTAGT
GGGCTTAGTATTTCCGGCAATTGCAATGGCTTCTTTATCTCTTCATGTTCAAAAAAACAAGATTTTGTAGATCTGATGGT
AGCAAATCTTATCTA------------T-------------TTCTTTTT-TCAA-----TACTTAGACTTGGACGATA--
----ACACAAGTAT-CTTTTTATTAGAATATGGTATAACATGCGGCTTCCTTC-----AAAAA---AAACATAAATG---
----------------------AAAAAAAGGGGT--TCTTATGCAGGCGTT-----------------------------
--------------------------------------------------------------------------------
--------------------------------------------------------------------------------
----------------------------------------------------------------TGAAAAAAAAATCGAG
ATTGGGGC-----TACTGCCTGAAATTAA---------AATAAAAACAAAGC--------------------TAATGTAT
CTATATGT------------------------------------------------------------------------
----------------------------------ATAAAAGTTAC-TTTGGAAAC--AACAAAAGTAAAA------TTCA
------TTTGGGCTAGTCTCCC----------------------------------------------------------
--------------------------------------------------------------------------------
-ACTTTCAATAA------AATGCAACTGGATGTAGTATGAGTTGGCGATCAGAACGTATATGGATAGAACGTATAGCAGG
ATCTCGAAAAACAAGTAATTTTTTCTGGGCCTTTGTGCTTTTTTTAGGTTCCTTGGGTTTTTTATTGGTTGGAATTTCCA
GTTATCTTGGCAGAAACTTAATCTCTTTATTTTCGTATCAGCAAATAATTTTTTTCCCACAAGGGATGGTGATGTCTTTC
TA-TGGCATTGCCGGTCTATTTATTAGCTCTTATTTGTGGTGCACAATTTCATGGAATGTAGGTAGTGGCTATGATCTAT
TTGATAGAATAGAAGGAATAGTGTGT--------------------------AAATCGTCGCATCTTACTCCGATTCCTT
ATGAAAGATAT---------------------------AAGGTATTTATGCTTGGCGCATTCTT------TATATGGAAA
TCAGAGGGCAGGGGGCCGTTCCTTTGATTCGTACTGATGAAAATTTGACTCCACGAGCAATTGAGCAAAAMSSRKCKGAA
TTGGCC---------------------------------------------------------------TATTKCTTGCG
TGTAC--CAATTGAAGTATTTTGATTAGATAC----AAAT-AGATCATATCTTGTAAATTCTCTCC-CCCCACCCT----
-TTATTTT-GTCA------ATCAACCTTTCTTTGTT--------------------------------------------
--------------------------------------TCTTTTTAG-TTTTTGCCGCTC----A-----TTTTTGATCA
TC---ACAATATTCTTTCA-------------------------------------------------------------
----------------------------------------------------------------------------GAAA
TTCTTTCATCTCGAAATCGGAATTGGAAGTGGCTCTTTCGGGCATTCGTCGAA----AAGARGGAATTGCTTC--AAATT
TGAGCAAT----------------------------------------TGAGATATCTGGAAAGAAAAGGA---------
--------------------------------------------------------------------------------
--------------------------------------------------------------------------------
--------------------------------------------------------------------------------
-----------------A-----------------------------------------------------CTGGTGTAT
CGCTTTTTCATTTAATAAAAGTCTGGAATCTTGGGTTATTAATTGGTGGAATACTAATAAATACGAAACTTTTTT-AAAT
GA--------------ATATTCTAAAAAAATTTATCGAATTAGAGGAACTTTTACTGTTAAACGAAATGATAAAAGAATA
CCCTGAAACGCATCTACAAAAGTTT---------CCTATTGCAGT-----------------------------------
--------------------------------------------------------------------------------
-----------------------------------------------------------TGACACAATAAAAGCTTTTTC
TATTCTTTTATTAACCGATTTATGTATAGGATTCCATTCACCGCATGGTTGGGAATTAATGATTGGCTCTGTCTACAAAG
ATTTTGGATTTGCTCATAATGATCAAATTAT-ATCTGGTCTTGTTTCTACTTTTCCAGTCATTATTGATACAATTTTGAA
ATATTGGATTTTCCGTTATTTAAATCGTCTATCTCCGTCACTAGTAGTGATTTATCAT-TCAATGAATGACTG-AAAAAT
GGTTCACCGATCAAATTAGAATGTTTGGT---------------------------------------------------
--------------------------------------------------------------------------------
-------------TAAAAGATTCGGATC---------TTTCT-------------TAT-------AGTTTTG-AAAAATT
TTTCAGTAAATAGCAGCATCGTGGATAGGGAACTATA-------------------------------------------
-------------------------------------------AGGGAAGAGATCACTCGCTCCATTTCCGTATCGCTCA
TGATATATATAATCACTCAGGCATCCATTTCAAAAGCCTATCCCATTTTTGCACAGCAGGGTTATGAAAATCCACGTGAA
GCAACTGGCCGTATTGTATGCGCCAATTGTCATTTAGCTAATAAGCCCGTGGATATTGAGGTTCCACAAGCGGTACTTCC
TGATACTGTATTTGAAGCAGTTGTTCGAATTCCTTATGATATGCAACTGAAACAAGTTCTTGCTAATGGCAAAAAAGGAA
CTTTAAATGTAGGAGCTGTCCTTATTTTACCCGAGGGATTTGAATTAGCCCCTCCCGATCGTATTTCGCCAGAGATGAAA
GAAAAGATAGGTAATCTGTCTTTTCAGACTTATCGC----CGAAAAAAAATATTCTTGTGATAGGTCCTGTTCCTGGTCA
GAAATATAGTGAAATCGCCTTTCCTATTCTTTCTCCGAACCCTGCTACTAAGAAGGATATTCATTTCTTAAAATATCCCA
TATACGTAGGGGGGAACAGGGGAAGGGGTCAGATTTATCCCGACGGGAACAAGAGTAACAATACGGTTTATAATACTACA
GCAGCAGGTATAGTAAGCAAAATTCTACGAAAAGAAAAAGGGGGGTATGAAATAACCATAACAGATCCRTCAGAGGGACG
TCAAGTGATTGATATTATACCTCCAGGACCAGAACTTCTTGTTTCAGAAGGCGAATCCATAAAACTTGATCAACCATTAA
CAAGTAATCCTAATGTGGGTGGATTTGGTCAAGACGATGCGGAAATAGTACTTCAAGATCCCTTACGTGTTCAAGGCCTT
TTGTTTTTCTTGGCATCTGTTATTTTAGCACAAATCTTTTTAGTTCTTAAAAAGAAACAGTTTGAGAAGGTTCAATTGTC
CGAAATGAATTTCTTGATCTACGGATTTATCAYCAGCAAGTTCTTAAAAAGAACACA----ATTTTTGKTGRCAATTATG
TATGATCAAATTTTGACAAGCC-----TTTTTCT---TTTCTTTCTA-----TTTTTT-------TATACCAG-----AT
TTTGGGA-------------------------------------------------------------------------
-------------------------------ATTTAATCTAAATGGAAACGGTCTGATTCTGTTACTATTGTCAAATGTC
ATACAATGTATCACTCTTC-------------------------------------------------------------
--------------------------------------------------------------------------------
--------------------------------------------------------------------------------
---------------------------------------------TTATTATGTATA----------------AAAAGTT
---AAAA----------CCTAGTGGACAAAGAAAAAAGAAAAGGAAAATTTTTAAG-------------------CAAAC
AGAACTTC------------------------------------------------------------------------
--------------------------------------------------------------------------------
--------------------------------------------------------------------------------
---------------------------------------------------------A----------------------
--------------------------------------------------------------------------------
--------------------------------------------------------------------------------
---------------------------------------TTTTT-----TAAAGTATTTGAAATATGAGAGAGCTCAACG
GGACCTATGCCCC-TTTTTTCTCTCTTTCTTTTG---------ATTTGAGGGGGTTCGTTGAGCTCTTACGCTTTCATGT
CTACACCACAGTTTATCCGATTATTACAGGGACGAACCCAATCCGGAATATGAACCATAAAAGAAAATGCCTATTAAACC
AATCACAGGAATACCAGTTACAGTACCTATTATCCAAAGAGGAATCCTTCCAGTAGTATCGGCCATTTCTCTCACTTTCC
TCCA-----CAT---TTAATCAAGCGGTCATGCTAGAGACCTGAACAGTCATAGATAATTATGAGATGATATCCTTCCG-
-------ATGGGGTAAGAGAATTCTTACTCT-ATATTTATTATTCTACTA----TTTTTTGTATCTTCGATTAATTGAAG
AAATAATTAGAAAATAAAACAGCAAGTACAAAAATGAGTAATAACCCCNAGTAGAGACTGGTACGATTCAATTCAACATT
TTGTTCATTCGGGTTTGATTGTGTCATGGCTCTATA--------------------------------------------
-----------------------TAGGTACAGCTAATCCGTGAACAGCCAACCATCGTACTGTAAAAATTGGATAGGTTC
GATCTATGGTCATTGGGGC------AAAAGATCTACTAAATTCATCAAGTTGTTCCAAAGGATCAAAACGGCCAGTTATT
AAAGGAATTCCTTGTCGGCTTTCTGTAAAATATTCATTTGGGCGAGGGCTTCCAAAAACATTGTAAGCTAAACTCGTG--
----------------------------------------------TGAATGACCCAATATCGAATACTGGTAATAATAT
CAGCAAACGAACGTTCTCCTGTGCTTCCAGACATGCCGAGCTCCATATATTCTTGTACAGTCA---AAGGGGGATCCTTT
TTGTAAACGATGAGATCAGTAAATT-TTCATTTACTGGGATTCCTTCCT-------TGTGAGATTGTCAATACAATATTG
TACCAAGGGTTTTGTTAAAGTATACCGAATCAGTATAGCTATCCTTCTTCTGACGCAGCAATGCAACTTTAATCAGTATC
GAAATGAAGCCTTAAATAATTT-CTTTCTTCTTTTCATTTTTCTTT----------------------------------
--------------------------------------------------------------------------------
--------------------------------------------------------------------------------
--------------------------------------------------------------------------------
--------------------------------------------------------------------------------
--T-----TTAATATTCATTTTCTATT---------------------TTATT------TCTCT------AGAATT-TCC
AAGGAATCTCTTG-----------ATTCGGAATCATGTGAGGATTGG---------------------------------
-------------------ATTTCCTTTCTAC--TT-A--TACCACTCTATTTTT-----GTTAGTGCCAT---------
---------------------------------------------------------------------------AATTC
A----AAACTTGCAATTGAACGTATTCATTTAATATTGGTATGTT-------TTTTAGTCTTGTATCTTTC----AAAAA
ATTG--------AACTTTAGGAAAGTACTTTACAACCATATAAT------------------------------------
-------------------------------------------------------CAGTTTTATTTATTGGTCTGAGTAG
GATACGACTTATTTGATTCAAGTAAATTGAATGAACA-------------------------------------------
--------------------------------------------------------------------------------
-------------ATTACCTC---TTTTTTCTCTTT------AAACAAAATTTGAAATGATTGAAGTTTTTCTATTTGGA
ATTGTCTTAGGTCTAATTCCAATTACTTTGGCTGGATTATTCGTAACTGCATATTTACAATACAGACGTGGT--------
-------------------------------------------------------------------------------G
TCAAAATCAGAGTAGATTGTTGTTCAAA--TTTTCTGTATAATTTTGACC-----TAACAAAA---------CAGATTCA
CGCTCTGTAGGATTTGA----------ACCTACGACATYRGGTTTTGGAGACCCACGTTCTAC-----------------
---T--------------------------------------------------------T-------------------
-------------------------------------------------------CA-----------------------
--------------------------------------------------------------------------------
----------------ATACATCA----TTGTTGCTTAGAGACAAAGTAATAGGTAGGGATGACAGGATTTGAACCCGTG
ACATTTTGTACCCAAAACAAACGCGCTACCAAGCTGCGCTACATCCCTTTCAATTGGT-TACAATGTCATTGTAGAGAAT
CCATATATAGTTTTCCACATACTTA-TTTCATTTTCTCTATCAATATACACAACTTATCTTTCCATTTC-TTTTTTTTGG
TCTC------ATATAT--TAATA-AT-----AAACA---TATK-----AA-AAAAAW-------RTATAT------GAAA
CCCGCCTTTGTG------AATCTTTGGGCGGAAGCGGAC-TATTTTG-----TTCTTCT---------------------
-------------------------------GATCTTATTTATCAAAT-CGTTGTAC----ATTTCTATTTGAATTAGGG
ATTCCTC-CCCCAT---------ACAAAACGAATACAAGTGG-------CC--TTT---------AACTA-CAAAAACCT
TAGATC------ATATA---------TTATACA-----------------------------------------------
---------------------------------------------------GTAATAAGTACTATATGGTTCGGGTCTTT
AGYAGGTCTATTGATAGAGATCAATCGTTTTTTCCCAGATGCATTAACATTTCCCTTTT-TTTCATTCTAGTTATT----
-TACACGAGGGGATG----AAAAAAGATTAAAGATAGAATGAAAAATCTGT-----------------------------
--------------------------------------------------------------------------------
--------------------------------------------------------------------------------
--------------------------------------------------------------------------------
--------------------------------------------------------------------------------
--------------------------------------------------------------------------------
--------------------------------------ATACAAT-ACTGT-------------CTAGTAATTCTAATCT
AAACTTCTAATCGAAATAG---AGTTTAAAATCATTGTATTACTTA----TTATTTATTAATA------TCTTG-T----
--TTGCAACAA-AAAATTTCGCGAAATT---TTATTTCGAGTTAACAACTTCTAT-----TTTTTCCTT-----------
-CC--TTTCTTCTTCC------TTTTGGAT--CAGA------AAAA---CGAGAG-----GAG-TTAATTGGAT--AAAA
AATCAAA---AGGGGG--TTCATGGCCAAAGGTAAAGATGCCCGAGTAAGGGTTA--TTTTAGAATGTACCGGTTGTRTT
CGAA--ACARTATTAATAAGAAATCAACAGGCATTTCCAGATATATTACTSAAAAGAATCGACACAATACGCCTAGCCGA
TTGGAATTGAGAAA------------------------------------------------------------------
--------------------------------------------------------------------------------
--------------------------------------------------------------------------------
--------------------------------------------ATCATTATTNTTTT-TTGATCCAACCGAA----CGA
AATAGGATTTTC-G--------AAATAAGTAAA---ATAAACAAATCATGGATAAATCTAAGCGGTTTTTTCTTAAGTCC
AAACGATCTTTTCGTAGGCGTTTGCCCCCGATCCAATCGGGGGAGCGAATTGATTATAGAAACATGAGTTTAATTAGTCG
ATTTT------------AAAAAATATTATCTAGACGGGTAAATAGATTGGCTT-TAAAACAACAACGATTAATTACTATT
GCTATAAAACAAGCTCGTATTTTATCTTTGTT------------------------------------------------
----------------------------------------------------ATTGAATCAAAATTACAATTCGAACTCA
AAGGTAGATTGAAGGTTTTGTTCGAAAAATTCGAAAACCCAGATTT-GATTGTCGTAAG-----AAAAGAAACGAATTTG
GGAAGAAGA--AATC----------TTTTTTTTATT-------------------------------------------G
AATG---------------------------------TAATGATCATATT------------------------------
----------------------------------------------------------------------TGA-C-ATAC
TTTATCATACTAATTTCTATTCTATCCTCTCAGAATTCATTCTCTA--------------TTGAATTCCGTGTAAATCAT
TCCGA---------------------------T-----------------------------------------------
-----------GCAATTCCTATTTAATATAGCTATTTGCGCCAGTATTTTACRATTAAGAAGCAAYTGTCTCTTGTATAG
ATTTTTTATTAATCTACTATAACTATAGGATGCCTTAGTCTCACGAATTACTGCATTAGATCGG----------------
--------------------------------------------------------------------------------
-------------------------------------AAGAGCACACGTCTTCTACGCCTTCGAGCTACATATCCCCGTC
TAATTCTGGTCATTGACTAAACGAAACTTTGATGAATAACT--------AATTGATTTCCTTTCTTTCAGTTATTCTTGT
CCCTT-TTCTATAATAACAAAACGGAATCCTCCAAT------GTATA-AAATAATAATTCCAAGGGCTTTTGCTACTATA
ACCTTCCCAACCACAA--TT--------TTTTTT--------------------------------------TTTC----
--------------------------------------------------------------------------------
-------------------------------------------T-----------------AG--G--------------
--------------------------------------------------------------------------------
--------AA----------------------------------------------------------------------
-----------------------------------------TTGT-----------------------------------
--------------------------------------------------------------------------------
-----------------------------------TACAGTAACGGT-----ATTTAATTCTG-AAGATTAGCTGATTAG
CTGACCT-------------------------------------------------------------------------
---------------------------------GGGAATTCTTT--ATCATTTTAAATGAAAAAATGAGGTGATCAAATT
TCCACCAATAGAAAACACATAAATTTAATACACAATAACAATAGAA-GGATATCATAGATCTTTTT----TTTTTT----
--TA--------------GATAGTG-AAGGGG----TTTTTCTATM-----CKACCCATCCGTGTACTGATCATGGATAG
TGG-AAAAAT----------------------------------------------------------------------
--------------------------------------------------------------------------------
-----------------TTGAATTGTATGCATAATGGGC------TGGTTTAG-----------ATCGATCCTAACCAGA
-----------A-----------GATTGTGAA------------------------------------------------
--------------------------------------------------------------------------------
--------ATAAAA-TCTCAAATTGTTTGTGCAATTTGCACGAAATTTTTGTTAGTTTTTATGAAACTGCTACAAGATCA
ACAATTCCATGAGCTTGGGCTTCTGTTGCTGACATAAAAACATCCCTTTCCATGTCTTCGGATACGACCCATAAGGGTTT
GCCCGTTCTTAGTGCATAAACCCGTGTGAGGATTTCGCGCAGTTTCAGTAGTTCTTCTGCTTCCAGGACAAATTCTACTA
TTTGTGCCTCATAAAAACCAGCAATAGGTTGATGGATCATTACCCTGATG--ATATAAGATAATA-AAAAAAAAGATTAT
TCTATCCCAAGTCATAAGACGACGAG-ACGAGATAAAGAATAATAAG--AAAAAAGATAGAATTGAAC-----AACCGTA
CAGGCATTGTTTGCGGATTGCATACGGC-TTTAGACTGGAATTTAC--TTTTCTCTTTTATCGAAGAAAAATG-------
--------------------------------ATCCAATAACCGCCCTTCCCTTGGGAGTAGTT--AAAAAATACTACGG
-----------------TTCATCGGTGATTTAGCAATCC-----CA-AAGTTTCT-------------------------
-------------------ATTT---------------------------------------------------------
--------------------------------------------------------------------------------
--------------------------------------------------------------------------------
--------------------------------------------------------------------------------
----------------------------------------------TAAAGGCATAGTTTTCTTTGTT--CTTTCAAAT-
-----CAAAAACTCATTGGCGCCAAGCGTGCGGGAATGCTAGACGTTTAGTTATTTTTCCTCCGACCAGGATAAAAGATC
CCATTGAGGCGGCCAATCCCATACATACTGTCTGTACATCTGGTCGCACAAATTGCATAGTATCATAGATAGCTATTCCA
GGTATTACCCATCTGCCAGGAGAGTTTATAAACAAATACAAATCTTTAGTTTCACTCTCTATACTCA-GATAGACCATAA
GACCAATAAGTTGATTTGAGATCTCGC--------CCTTGACCTAAAAAAAGTAATCTTTCTCGATAAAGTCG-------
-------------CCCCCCTAGAAACCGTACATGCATCTTTTGCTGCATACGGTTCAACAAAAATCGAA-----AAAAAA
AYAATCAATGTGTAGCTTCCAGTTCTC-CTTTTTTTGATAGTGAGTACTTTCTAACTTCTCT-------TCTAATGAAGA
GGTTGTTCTTYCAT-------TTTTTTTTTT-------CAAGAAAGAGAGGTTTTGA-----TTA---------------
----CCTATATGTTTACC-----------TA--TATAG-------AATTGATTAAATTAAACTTATCAA-----------
ACTAACTTCTTATTGATGTATTCTTT-CATCGAGATCTAATTTCAATCATGATGGCATTTTCTTGTTCC-TGAATGGG--
-TTTCTTTAATTCTTCTTTAGGTTTGTGCTCTACTCCGTGTAAAGATCTGCCCGAATTTTG---ATTTG-----------
--------------------------------------------------------------------------------
--------------------------------------------------------------------------------
--------------------------------------------------------------------------------
-------------------------TCCGAAAAAAT-A---------------------A-GTAG---------------
------TAATGAT----------AGA-TAT------AGTAGTAATTGGTTTTTTATAAACGGAGCCTGGATACTTCA-TT
TTTTT-GRGCCAACCAAGCTAACCATAAATTATATTAATTTA---------------TACCCCCAAAGCATAGATGAACT
TCACGCTCCAATTTT------TTGATAATTTAATCAATCTTTCTTGGGTGAAACAGAGGATC-TCTCGATCG--------
--CGGGAAAATCCCGTATGACCCAATATATCTGACAAGTCGCACTA----------------------------------
---------GGTACTTTTGGAACACCAATAGGCATTAAATGAAAGCTAAAA-CTAAGTACTATATTTCACTTTGAT--GT
GAAAGCGTAAGAATGAATTTATTGTTTTA-----AAAATATTG------------------GCCTTT-------------
--------------------------------ATCATATGTTATGCGTGGATTCGCTAAGTTTATA----AAAATAAAG-
-----------------GAAGCCAAAATAATACGAT--------------------------------------------
--------------------------------------------------------------------------------
--------------------------------------------------------------------------------
--------GTTTCTACAAACAAAATTGTTACATTGTT----ATTA-AAAGAATAG-----AAAAAAA----AAGAAATCT
TTCTCAGAGATAATCCAACGA--A-AAAA-----AAGGGGGT----CCATAACATAG-----TTTTTTTCCAGTGCAATA
AAGTTACATAGTGTCGATTTGTCATTGATA-----------------AA--GGGGTATTTCTATGGGTTTGCCTTGGTAT
CGTGTTCATACTGTCGTATTGAATGATCCCGGTCGTTTGCTGTCTGTCCATATAATGCATACAGCTTTGGTTGCTGGTTG
GGCCGGTTCGATGGCTCTATATGAATTAGCCGTTTTTG-ACCCCTCTGACCCTGTTCTTGATCCAATGTGGAGACAGGGT
ATGTTCGTTATACCCTTCATGACTCGTTTAGGAATAACCAATTCATGGGGTGGTTGGAGTATTACAGGAGGAACTATAAC
AAATCCGGGTATTTGGAGTTATGAAGGTGTGGCTGGGGCGCATATTGTCTTTTCGGGCTTGTGCTTCTTGGCAGCTATCT
GGCATTGGGTATATTGGGATCTAGAAATCTTTTGTGATGAACGTACAGGAAAACCCTCTTTGGATTTGCCCAAGATCTTT
GGAATTCACTTATTTCTATCAGGAGTGGCTTGTTTTGGGTTTGGCGCTTTTCATGTAACCGGATTGTATGGTCCTGGAAT
ATGGGTGTCTGATCCTTACGGACTAACCGGAAAAGTACAA-TCTGTAAATCCAGCGTGGGGTGTGGAAGGTTTTGA----
------------------------------------------------------------GGCCTATTTCATCTTAGTGT
CCGTCCGCCTCAACGTCTATACAAAGGATTACGTATGGGAAATATTGAAACCGTCCTWTCTAGCAGTATCGCTGCTG-TC
TTTTTTGCAGCTTTTGTTGTTGCTGGAACTATGTGGTATGGTTCAGCCACTACCCCCATTGAATTATTTGGGCCGACTCG
TTATCAATGGGATCAAGGATACTTCCAGCAAG---------------------------------AAAATCAAAGTTTAT
CCGAAGCTTGGTCTAAAATTCCTGAAAAATTGGCTTTTTATGATTACATCGGTAATAATCCGGCAAAGGGCGGATTGTTC
AGAGCAGGGGCAATGGACAACGGGGATGGAATAGCCGTTGGGTGGTTAGGTCATCCTATCTTTAGAGATAAAG-------
--------------------------------------------------------------------------------
--------------------------------------------------------------------------------
-------------AGTTATAGTGACCCTGCTACTGTGAAAAAATATGC--------------------------------
----------------------------TGTTTTTCGTAGTAGTCCAAGGGGTTGGTTTACTTTTGGACATGCTTCATTT
GCTCTTCTCTTTT-TCTTTGGACACATTTGGCATGGTGCTCGC-------------------------------------
------------------------------------------------------------------------------T-
--------------------------------------------------------------------------------
----------------TGAT--TTGAATCGTCGCCTTT------------------------------------------
---TCCTTCAATCTTGCTCCTTTTTATCC------GGGGGGCGATCCYTAATAAACAGATATGGAAGTTATAAT------
TGTAAACCACGATCGAATCTATGGAAGCATTGGTTTATACATTCCTCTTAGTCTCGACTCTAGGAATAATTTTTTTCGCT
ATCTTTTTTCGAGAACCGCCTAAAGTTCCAACTAAAA---AGATGAAATGAT-TTTTT------ATTATCTTAGTTAAAG
TAAAGAGCCTCCCA-----A--------TATTGAGAGG--CTTTACTTCAACTAGTCCCAATGTTTCTCTAATGGATCTT
TTAATTG-----------------------------------------------------------------------TA
GCGATCAGGGTTGCTGTTTCCATTATTATAGAATTTCAAGAC--------------------ATYATATATTTACAACGG
AAYGGTATACAAAGTCAACAGATC----------------------------GCTACACAAAATGTTGAGAGTAGTTCTA
GATCTGGTCCAAGACGAACTAGTGTAGGGGATTTATTGAAACCGTTGAATTCGGAA--TATGGTAAAGTAGCTCCTGGAT
GGGGAAATACTCCTTTGATGGGTATCGCAATGGCTCTATTTGCGATATTCCTATCTATTATTTTAGAGATTTATAATTCT
TCCGTTTTACTAGATGGAATTTCAATGAATTAGATGTACAAGGACCACTAAGTCCTAGCTTTTCAAT-AC-AAAGTGAAG
CGTT-------------------------------------------------------TAGTTCGATCGTGAAATTTCT
--TTCTTTCTGTATTTTTTGAATATGAGT-GTGCGGCTTGTTATAATGGATCCTA-TTGATAGTACAGAGAAAGGGCCTG
TC-----ATCTTGATAGAGATT--GCTTTTTACC----------------------------------------------
--------------------------------------------------------------------------------
--------------------------------------------------------------------------------
-------------------------------------------TAWATTCAAAGA----------------TTTTTCTTC
TTTCAAACTC-TTTGTCTATGCTT---TTTTTTTATCAAAGGG-----CAAACCCTTCT----TTGT-----ATTTTTAG
T---TAC--TATTTTTCTTCAATTCATTGAATAAGTGATGATACAACGATTCTTACTCAGGGAATCTTGGGTT--TAGTT
T-------------------------------------------------------------------------------
--------------------------------------------------------------------------------
---------------------------------TCAAGAGGCCTGTAATGATTAACACTAAGAGATCAA-AGAGCCAACT
TGAAATTTTGGCATTATAACCACAA---------------TTCGTGT-----TTTTTTGTATCATAATCTTCAGGGAAGA
TTG-TTTGAATCATAGAATT---AAGAAG--TTTTTTTT---ASACATATTGGTTTCAACTAATATTTTGGTGTTTCCGT
TTGAGCTGTACGAAATGAAATTCTCATATACGGTTCTTAGAGGGGGAGTCTCCCCGGTTTACCTATCTCAATAAAGTCTA
TGATTGGTTCGAAGAACGCCTCGAGATTCAGGCGATTGCAGA--------------------------------------
--------------------------------------------------------------------------------
---------GTTACT--GAGGCTTTTGCCTCAGTTCAATACATAATGACTG---AAGCTAA----------TTAATTCGA
TCAGTTCATCGCTGGTYGGCAAGTATGATGGTCCTAATGATGATCCTGCACGTATTTCGGGTGTATCTCWCCGGTGGCTT
TAAAAAACCTCGTGAATTGACTTGGATTACAGGTGTGGTTCTTGCTGTATTGACCGCATCTTTTGGCGTAACAGGGTATT
CTTTACCCTGGGACCAAATAGGTTATTGGGCAGTAAAAATTGTAACAGGTGTGCCGGAAGCTATTCCTGTAATAGGATCT
CCTTTGGTGGAGTTATTACGTGGAAGTGCTAGTGTAGGACAATCTACTTTGACTCGTTTTTATAGTTTACATACGTTTGT
ATTACCTCTTCTTACTTCCGTATTTATGTTAATGCACTTTTCAATGATACGTAAGCAA----------------------
----------------------------------------------TCAATC---------ATTA-ATCGTT-------T
GGGGGAGGAAGATATAGTATTTCATTGCTATAAATATGGATTATTAA--AAAAAAAAAAAAAGAAGACATGTATTTGGAT
AATTTCCTTCAACTCC--------AAAAAAAA------------------TTGGATTTW--TTTTTT---------TTTT
TTTTTATTTTTTTTAAAA----------------------------------------AAAAATGGATTATGGGAGTGTG
TGACTTGGACTATTGATTTAGCCGTGCAGATATATGCCTTTATCCGCCACATTGGAATTCACAATCAAATGTGTCTTTGT
TCCACCAACCGCGAAAGCCCCATACAATA-C--AT-----A-GGGTATGCTGGTTCGCTTGAAGAGAATCTTTTCTATGA
TCAGACT-CCAATCATGTTGTG-----CATGAAGAGGCTCCG---------------AATAAGTGATGTGGTAGAAT---
-----------CCATATTCTATTCTATTTTAGGTATTTT--ACCTAAT------ACCTTGT----------TTTAYAGAT
TTCATTTACTTAAAATWT----------TTTA---------AATAGTATGGAAATGCAGCCATTTCCTCTGCATTGACTC
GATTTACGTTATTATCGGAGC-----ACGGGATCTACAGAATGCCAGAGGCTAAACT-----------------------
--------------------------------------------------------------------------------
-----------------------------------------------------------------T--------------
-----------------------ATTACAA--------------------------------------------------
---------------------AAGATCATTCATCTATAT-GTAGAGATGGATACCGTATGGA---------------TTT
TATAACATCT---AGACATATAT---------------------------------------------------------
--------------AAAAATTATCATGTCCGGTTCCTTTGGAGGATGGATTTAT--GAATTCACC---------------
--------------------CTGTATTAAGAGCTAAATTGGCTAAAGGAATGGGTCATAATTATTATGGAGAACCCGCAT
GGCCCAACGATCTTC-----------------------------------------------------------------
-------------------------------------------------------CTGAATGGTATTTCTTTCCYGTATT
TCAAATACTTCGTACAGTACCAAATAAGTTATTGGGTGTTCTTTTAATGATTTCAGTACCTGCGGGAC------------
--------------------------------------------------------------------------------
--------------------------------------------------------------------------------
--------------------------------------------------------------------------------
-----ATCTATTCA-ATGTTAAAA-AAAAGAAAAAGGTGTAAA---------------TAAGTCCATTGGGTTTAAAATT
GATTCTTTGGTAAATCAATTGCGAAATG----------------------------------------------------
----------------------------------------GGTCCAATAATGTATGTATATTTGACCTTTTCAGGGAATT
ATAGATCTTCGGAATCAATTCTAAT-------------------------------------------------------
--------------------------------------------------------------------AACCTTGTGCTG
A------TTTTTTTCTAAATGCGCGTTTTCTTCTTTTGCATGTAGAAAAAGAATAAATAAATTAATCA------------
-------------------------------------------------------------------CTTTTCATTCCCG
TTTCCATAAGAATGAACACTATGATTT---GCATTTTTAACAGGCATGAATATAGCATCTATAGGATAAGTTTCATCTTG
AAAATTTTTTGGCG-GTTTTAGACGATAGCCG-------CGACCCCTCTCGATTTGTAATTCAATACGCAAATCAATAGG
TTCGGTTAGTTTAGCTATATACTGTTTATTATCAATGATTTCCACAGCAGGTGGGAGGATGATGTCTTGAGCAGTTACAT
ATCCAGGGCCTTTTACATAAATAGATGCGTTATGA-TTCCATACAAATTACTTCTCAATACAATTTCTTTTAAATTCATT
AAAATTTCATGTACTGATTCTTGAATACCTGCTATAGTAGAAAATTCGTG------TGTTATTTTATGA-GATTTTGATT
TTGCACATGTGATACATGTTCCTTCTATTTCTCCAAGCAAAGCTCTTCGCATCGCAATTCCTATTGTGTCGGCTTGACCT
TTCATAAGTGGAGACAGAATAAAACGGCCATAATAAAGACGCTTACCGGTGGCTCTTGATTCAATACACTTCCACTGTAG
TGTCCGAGTAGATATTCTTACTTTCT--CTCGAACCATAATAATTTTATTATTTTTTT------TT-------GATCAAA
TAATTG----------AATTA----------TTTATTTCTCTTGAAATCTATTCAA----TGT----TTTTTTTTACATG
CGCCTTTTTTTCGGGGCTCTGCAGCCATTATGTGGCATAGGAGTTACATCTCGGACGAAACTTAATAGTATACCACTTCT
GCGAATAGCTCTTAATGCTGCATCTCTTCCGAGACCAGGACCTTTTATCATAACTTCTGCTCGTTGCAT-ACCTTGATCT
ACTACTGTTCGAATAGCAATTCCTGCTGCAGTTTGAGCGGCAAATGGGGTCCCTCTTCTTGTGCCTCTGAATCCACAAGT
TCCAGCGGAGGACCAAGAGATTACTCGGCCCCGTACATCTG---------------------------------------
--------------------------------------------------------------------------------
GTTTTTGGCATATTTTAT-CATCCAATAAATATAAATCATAGGTTTATGGATATATCT-----ATTTTGTGTCAAAATAG
ATCTT--------------------------------------------------------------------AGATTAT
CC--TTGTCTTTGTTTATGTCTGGGATTGGAGCAAATTACTTTAATTCGTCCCCGTCTCCGTATCAGTCGACATTTTTCA
CAAATTTTACGAACAGAAGCC--------CTTATTTTC---------ATATTTGTCATT-CCTTAATTT----------A
GAATATACATAC--------------------------------------------------------------------
--------------------------------------------------------------------------------
--------------------------------------------------------------------------------
--------------------------------------------------------------------------------
--------------------------------------------------------------------------------
-------------------------------------------------------------------------TTATATA
TGTATAAAAC------CACGTCGGGTCTTTCCTTTCTCGAAACCTAACCTAAAACTGGGTCTTTATTATC-TAAATGAAT
C-TGGGAACATACCATTAGAAAGTGATT---------TAGTAATTTACCCTTCCCGAATCCGCT-TCCT-----------
--------TTTGTTCTTT-CATTCC-CTCTAAAAGTCTCTTGAAGTAT-CTACTAATGTAG---GAGGA-----------
------ATTTATTAGAAAT---TTGTTCCTT---------------------TCCT------CCC----TTTTTTTC---
-------ACAAATAGA-----AAGTCCAGA------TACAAT-----TT---TGAAAGGATTACCATATATAACACAAGA
TTTCTCCACCGATTTTTTCTAGTCGAGCT----------------------GAGAAGTAGAAAGAATTACAATCCCTATT
CCGCCTAAAATTTTAGGAATTTGTTGATAGTTGGAATAGATACGTAAACCGGGTCGACTGATCC-GTTTTAAATTTAGAC
TTGTTTTATATGACCCTTTTCTATTCCTTCTATGCCGTAGAGTTAAAACCAAAAAATTTTTGTTCCCTTCCCGGTGTTTC
CTCACATTTTCAATAAAACCCTCTTGTAAAAG-TATTTTAATAGTATGTTCCGTAGTGGTAGTAGATCTTATTCGAATGG
TTCCTTTTTTATTCAT------------GTCAGCATTTCGTATAGAGGTTATTATGTCAGCAATAGTGTCCCTATTCATA
ATAAATTAAAATGTTTT---------------------------------------------------TTTTTTTTTTTT
TTTTC---TTTT----TT----TT-----------------------------TTTTTTT-------TTTA-----T---
--------------------------------------------------------------------------------
--------------------------------------------------------------------------------
-----------------------------------HG----------------ATTTTTTTTATAATACTTCAGGTGCTA
ATGAAACTATTTTAGTAAAATTGAATTGTCTCAATTCCCGGGTAATCGCACCAAAAATTCGAGTTCCCTTTGGATTTCCT
TCTTGATCAATGACAACTGCAG--CATTGTCATCATATCGTATTATCATACCGTTGTTGCGTTTGAGTTCTTTACAGGTA
CGTACAATTACAGCTCTGATCACTTCGGATCTTTCTAGAGGTGAATTTGGTACTGSTTCTTTGATCACAGCAACAATAAC
GTCACCGATATRAGCATATCGGYGATTATTAGTTACTAGGATTCGAATGCACATTAATTATC------------------
--------------------------------------------------------------------------------
--------------------------------------------------------------------------------
--------------------------------------------------------------------------------
--------------------------------------------------------------TTTTTTACGTTGCTATTG
AAAAAGCCCTTTTGGCTATACTTTCTGCTACTCCGCTCATTTCATAAAGTATTCTTCCTGGTTTAACAACAGCTACCCAA
TATTCGGTAGATCCCTTCCCCGAACCCATACGTGTTTCCGTGGGTCTTACAGTAACAGGTTTGTCGGGAAAAACACGTAC
CCATATTTTTCCACCGCGGCGCGCATTTCGTGTCATTGCACGGCGCCCTGCTTCTATTTGTCGAGATGTAATCCAAGCGG
GTTCAAGTGCTTGAAGAGCATATCTGCCGAAAGAAATACGATTACCTCGATAAGATATTCCTTTCATCCTTCCTCTATGT
TGTTTACGGAATCTGGTTCTTTTGGGGTTATAGTTGATGGTTGTTTCTCAATTCCATCTCTACTACAAAACCGGACATGA
GAGTTTCTTCTCATCCAGCTCCTCGCGAATGAAATTATAAAAAAATG-AAAT-------GATTA-TAAAAATATACA-TA
G-----AATTGATGAATAG-------------------------------------------------------------
--------------------------------------------------------------------------------
--------------------------------------------------------------------------------
--------------------------------------------------------------------------------
----------------------------------------------------T---------------------------
--------------------------------------------------------------------------------
--------------------------------------------------------------------------------
--------------------------------------------------------------------------------
--------------------------------------------------------------------------------
--------------------------------------------------------------------------------
--------------------------------------------------------------------------------
--------------------------------------------------------------------------------
--------------------------------------------------------------------------------
--------------------------------------------------------------------------------
--------------------------------------------------------------------------------
--------------------------------------------------------------------------------
--------------------------------------------------------------------------------
------------------------------CCT--AATGAAAA--TTCTTCTTA-AATCAATCTTCTCAGTCTTTC----
---TTGACTCG----------------C----------------------------------------------------
------------------------------------TTTTATATAAGATGACTCATAGACCTTACATA------------
--------------------------------------------------------------------------------
------------------------------------------------GTG----------------------GTGAA--
-----------------TTGCTACAAT-GGTATGAC--TAATATATCATATCTTTCGTG------TT-TTTTTTTTTTGG
ATCTA-GATAATGCGAAGTGATGAGTTGGTTATTCGTTCTATACTTAGTTAGTTCATAA-TTCGGGGTCAATCC------
TTTT----------------------------------------------------------------------------
------------------------------AAGCATAGCAATTA-----------TATCAAATT----------------
-------CTCAATCTA-ATTT-------------TTTATTTTAT------TCAACCTTA---------------------
------TAGAATTAGAA----------------------------TTGC-------------------------------
-----Y-----------------C-----------------AAAACAAA--------A-AAAAAAAAAAAAATGAAAA--
----------------------------------------------TGAACATAAA----------------------GA
----------CAAGTTAATTAAGGGTTTACTAT-TCCTCGTTTCCAAATGTCCA-AATTTTTATACCTAATACTCCATAA
ATAGTTATAA----------------------------------------------------------------------
------------------------------CTTTTCCGTC-------------------AAGACGCCCCGCAATTTGTAT
TTGAATTCCTTTTGTATCCGCTTGTTTGGTTAATTCAA-----------TAGCTTTT-----------------------
------CTTTAATTGTCCGGCTATAAATTCTGCAAGAATATTAGGGTGCTTATAGGGCTTTTTAATTCTTTTAATAGAAA
TCTTGAGCTTTTGGTTCACACAATTAAATTCTTTTTGTACATTTAGCTCTAATTCTTCGAGTTTTTTACTTTTAGGTTTA
GTTTCTATTAAAAATTTTGGGAATCCC--ATATATATTATAACCTGAATTACATCGATTCGTTTTTGAATCGTTATACGG
GAAATTCCCCCAACACCAAAAGAAACTTTCATATCTTTTTGTACAAAATTCTTGATACATTTTCTTATTTTTTTATCTTC
TTGTAGACCCTCGGAATAATTTTTTGGTTGTGCAAACCAAAGCGAATGATGACCTTGGGTTGTACCAAGTCTGAAACC--
-----------------------AAGTGGATT--------TATTTTTTGTCCCATAATCCCTCACTACTAT-ACATATGA
TGAGATGTTATACCCGTGGCTTTTTTTTTTTTTTT--------TTTTTTTTT----------------------------
------------------------TTTTTTTTTTTTTTTTT------------------------------------GTT
TTTT-------------------------------------------TTTTTTTTTCATDTTYGTAGTTATATGACAAGT
TGGTCTTTTTATTAGAGAATTGCGACCTCGAGCCCGAGGTTTTAATCTTTTCACAGTAGCACTCTCGTTAACTTCGGCTT
TACTAATGACTAAACTTGCTTCGTTGAACCCCATATTGTGACTAGCATTTGCTGCTGCAGAATAAACTAATTTAAAAATA
GGATAACATGTTCGATAAGGCATGAGCTCTAGTATCATAAGTGTTTCTTCGTAGGAACGTCCACGAATCTGATCAATTAC
TCTTAGTATTTT--------------------------------------------------------------------
--------------------------------------------------------------------------------
------------------A-----------------------------------ATTAAT--------------------
--GTA---------AATAGATAAG----------CATCTAG------AATG--------TATAT----------------
----------TTTTT----T------TATTAACGACGAGATTTATTATCATTTTTTGCGTGTCCCCGGAAATATAGAGTA
GGTGAAAATTCT--------------------------------------------------------------------
------------------------TATAATAGTAGATGCTCGGGACCACGTTACTATTATTTCTTTTTCTGCCTTTGTGT
TAAGTTTATTTATTTTTCTTAATAAATGATTTGCTACAAAAGGTTTTTTTTTT--AGTGAACGTGTCACAGTAAATTTC-
----TCCTA-----T-TTTTTTTTTTGAAAAGACGAAGAAACAAAGTCTATTTTCTCTCCTA-----TTTACTACGGCGA
CGAAGAATCAAATTATCACTATATTTATTCCTTTTTCTACTTCTTCTTCCAAGTGCAGGATAACCCCAGGGGGTTGCGGG
TTTTTTTCTACCAACAGGGGCCCTCCCTTCACCACCCCCATGGGGATGGTCTACAGGGTTCATAACTACTCCTCTTACTA
CAGGACGCTTACCTAGCCAACATTTAGATCCGGCTCTACCCAAACTTTTCTGGTTCACCCCAGCATTCCCTACTTGTCCG
ACTGTTGCTGAGCAGTTTTTGGATATTAAACGAATCTCCCCAGAAGGTAATTTTAATGTGGCCGATTTCCCCTCTTTTGC
AATCAGTTTCGCTACAGCACCTGCAGCTCTAGCTAATTGTCCACCCTTTCCAAGTGTGATTTCTATGTTATGTATGGCCG
---TGCCTAAGGGCATATCGGTTGAAGTAGATTCTTCTTTTTGATCAATCAAAACCTCTTCCCAAACCGTACAAGCTTCT
TCCAAAGCATACGGCTTTCTGGGTGTAGATGATGATATCTATACAGATGGATCTTATCTATCATACAATGAAGT-AAAGT
ACTACATGAGTGGATATATAGGAATCCAAATCTGCCGAATCACCCATGTTATGCTCTTCTACATCCTAGGTCTTCCCGTT
CCCTCATCTGGCTTATGTTCTTCATGTAGCATTCAGATCGAATGACTCTATGAAATTACGTCGATACTTCCACATATTAG
GGGTAACGTAGGAGACATCTCTATTTTTCCCCCGG-GGAATCTTTAGAATTACCACTGCTTAGCTTTCAATTCGTCTCTG
ACCATCAAATGAAATGTGAATAACCCGTCCTCCTCTCTTTGAAACAAGGGGCGCTTCTGGTTCTGTCGGTGCTTGAAACA
ATTTTGTCTTCTCCATATTACTATATCTCTAGAGTCAATAATTTTATATGMGGAACTACTGAACTCAATCACTTGCTGCC
GTTACTCTTCAGTTTTCTGTTGAGGTCTATCCTGTAGAGGTACTCAAATTGGATCAGTGATCGATTTCTAGGTTTCGTCG
TAAACCTAATTGGTTACTTCCAATTAC---AATCAATAGTTCAAACCGCACTCAAAGGTAGGGCATTTCCCATTTTTATA
GGAACTTCTGTACCAGAAATAATGGTATCTCCAATTATAGCCCCTCTGGGATGTAAAATATATTTCTTCTCACTATCCCC
ATAGTGTATGAGACAAATGTATGCATTTCGATTAGGGTCGTATT----------GATTCTACCATATATGTCTTTTTCAT
TCCGTCGAAAATCGATTTTACGGTATAGACGCTTATGACCTCCCCCTCTATGCCTTGCGGTAATGATTCCTCTAGCATTA
CGTCCTTTACCACAACGATGCTGTCCATAGATCAAATTATTTCGTGTATTGGATTTTACTTGACTGTCTACGGCTCCATT
GCGTGTGCTCGGGGTAGAAGTTTTGTATAAATATATCGCCATGCTATTAAGTATTTTGAT-----TTAAGTTCTTTTCTT
TCTAAGAGGTGGAATAGAATAACCCGGTTGAAGCGTAATGATCATACGTTTGTAATGCATTGTATGTCCCATAATAGGTC
TCATTCTTCTGCCCTTTCCCGGGAGTCGATGGCTATTCATAGCTATTACCTTGACACCAAAGAAGAGTTCGACCCAATGC
TTTATTTCTGTCCTAGTTGATCCTAATTCGACATTAAAAGTATATTGATTTTTCCCCAATAACTGAATACTTTTGTCTGT
AAATACTGCATATTTGATTCCATCCATAAATCTATTTTCTTCCCTATGAGTTCTAGTCTCAGTAAGAATGCTAGTTCTTA
CTG-----------------------------------------------------------------------------
--------------------------TTGGCGTGCATCCAGTAGGAATTGAACCTACGAATTCGCCAATTATGAGTTGGG
CGCTTTAACCATTCAGCCATGGATGCTTAGCGGGGATCCTCGTACATGGTGAATAACCAAATTCCAATTGAAATGAAATC
TTTAGGATAAAACAATGCAATTTAGGAGGAATC-----AATGAAAGGACATCAATTCAA---ATCCTGGATTTTCGAATT
GAGAGAGATATTGAGAGAGATCAAGAATTCTCACTATTTCTTAGATTCATGGACCCAATTCAATTCAGTGGGATCTTTCA
TTCACATTTTTTTCCATCAAGAGCGTTTTATAAAACTCTTGGACTCCCGAATTTGGAGTATCCTACTTTCACGCAATTC-
--------------------------------------------------------------------------------
----------------------------------------ACAGGGCTTCTTCCTATACCTATGAATTCCATTGGACCCA
GAAATGATACATTGGAAGAATCCTTTGGGTCTTCCAATATCAATAGGTTGATTGTTTCGCTCCTGTATCTTCCAAAAGGA
AAAAAGATCTCTGAGAGCTGTTTCCTGGATCCGAAAGAGAGTACTTGGGTTCTTCCAATAACTAAAAAGTTTATCATGTC
TGAATCTAACTGGGGTTCGCGGTGGTGGAGGAACTGGATCGGAAAAAAGAAGGATTCTAGTTGTAAGATATCTAATGAAA
CCGTCGCTGGAATTGAGATCTCATTCAAAGAGAAAGATATCAAATATCTGGAGTTTCTTTTTGTATA---TTATATGAAT
GATCCGATC--CGCAAGGACCACGATTGGGAATTGTTTGATCATCTTTCTCCGAGGAAGGGGCGAAACATAATCAACTTG
AATTCGGGACAGCTATTCGAAATCTTAGTGAAAGACTGGATTTGTTATCTCATGTTTGCTTTTCGTGAAAAAATACCAAT
TGAAGTGGAGGGGTTCTTCAAACAACAAGGAGCTGGGTCAACTATTCAATCAAATGATATTGAGCATGTTTCCCATCTCT
TCTCGAGAAAGAAGTGGGCTATTTCTTTGCAAAATTGTGCTCAATTTCATATGTGGCAATTCCGCCAAGATCTCTTCGTT
AGTTGGGGGAATAATCCGCACGAATCGGATTTTTTGAGGAACATATCGAGAGAGAATTGGATTTGGTTAAACAATGTGTG
GTTGGTAAACAAGGATCGGT------TTTTTAGCAAGGCACGAAATATATCGTCAAATATTCAATATGATTCCACAAG--
---ATCTAGTTTCGTTCAAGGAAGGGATTCTAGCCAATTGAAGGGATCTTCTGATCAATCCAGAGATCATTTCGATTHCA
TTAGGACTGAGGATTCGGAATATCACACATTGATCAATCAAAGAGAGATTCAACAA---CTAAAACTAAAAGAAAGATCG
ATTCTTTGGGATCCTTCCTTTCGTCAAACGGAACGAACAGAGATAGAATCAGACCGATTCCCTAAAAGCCTTTCTGGATA
TTCS-----------------------------------------------TCTGCTTCCGGAAGAAATTGAAGAATT--
-------TCTTGGGAATCCTACAAGATCCATTCGTTCTTTTTTCTCTGACAGATGGTCAGAACCTCATCTGGGTTCGAAT
CCTACTGAGAGGTCCACTAGAGATCAGAAATTGTTGAAGAAAGAACAAGATATTTCTTTTGTCCCTTCCAGGCGATCGGA
AAATAAAGAAATAGTGAATATATTCAAGATAATTACGTATTTACAAAATACCGTCTCAATTCATCCTATTTCATCAGATC
CGGGATGTGATATGGTTCTGAAGGATGAACTGGATATGGACAGTTCCAA----ATTTCTTTCTTGAACAAAAATCCATTT
TTTGATTTATTTCATCTATTCCATGATCGGAACGGGGGGGGATACACGTTACACCACGATTTTGAATCAGAAAAGAGATT
TCAAGAAATGGCGG-----------CTATCAATAACCGAGCCGGATCTGGTGTATGATAAGGGATTTGCCTTTTTTATTG
ATTC------------------------------------------CTCCAGGGATGAATCGAAAAAGAAATCTTTATTG
GTTCTACCTCCTATTTTTTATGAAGAGAATGAATCTTTTTATCAAAGGATCAGAAAAAGATGGGTC--GATCTYCTGCGG
GAATGATTTGGAAGATCAAAAACAAAAAA------TAGTGGTATTTGCTAGCAAC------AACATAATGGAGGCA----
--CAATATGGATTGATCCGAAATCTGA------------AATATAGCACCTATGGGTACATAAGAAATGTATTGAATCAA
TTC--------------------------------------AATTCAAAGGGATCAAATAGGAAATGATACTCTGAATCA
TAGAACTATAATGAAATATACGATTAACCAACATTTATCGAATTTGAAACAGAGTCAGAAGAAATGGTTTGATCCTCTTA
TTTTTCTTTCTCGAACCGAGAGATCCATGAATTGGGATCCTAATGCATATAGATACAAATGGTCTAATGGGAGCAATAAT
TTCCAGGAGCATTTGGAACATTTCATTTCTGAGCAGAAGAGHS-------------AWGTTCGATCGATTACGTATTAAT
CAATATTCGATTGATTGGTCTGAGGTTATCGACAAAAAAGATTTGTCTAAGTCACTTCGTTTCTTTTTGTCCAAGTTACT
TCTTTTTTTGTCCAAGTTTCTTCTCTTTTTGTCTAACTCACTTCCTTTTTTCTTTGTGAGTTTCGGGAATATCCCCATTC
ATAGGTCCGAGATCCATATCTATGAATTGAAAGGTCCGAATGATCAACTCTGTAATCAGCTGTTAGAACCAATAGGTCTT
CAAATCGTTCATTTGAAAAAATTGAAACCCTTCTTATTGGATGATCATGATACTTCCCAAAAATCGAAATTTTTGATCAA
TGGAGGAACAATATCACCATTTTTGTTCAATAAGATACCAAAGTGGATGATTGACTCATTCCATACTAGAAATAATCGCA
GGAAATCTTTTGATAACACGGATTCCTATTTCTCAATGATATCCCATGATCAAGACAATTGGCTGAATCCCGTAAAACCA
TTTCATAGAAGTTCATTGATATCTTCTTTTTATAAAGCAAATCGACTTCGATT---------TCTACATCACTTCTGCTT
CTATTGTAACAAAAGATTCCCTTTTTATGTGGAAAAGGCCCGTATCAAGAATTATGATTTTACGTATGGACAATTCCTCA
ATATCTTGTTCAT------TCGCAACAAAATATTCGCTTTGTCTTTGTGCGGCGGTAAAAAAA---ACATGCTTTTTTGG
AGAGAGAT----TTTCACCAATCGAGTCACAGGTATCTAACATATTCATACCTAWTGATTTTCCACRAAGTGGTGACGAA
AGTTATAACTTGTACAAATCTTTCCATTTTCCAATT------GGTCCATTCGTTCGTAGAGCTATTTATTCGATCGCAGA
CATTTCTGGAACACCTCTAA-CAGAGGGACAAATAGTCAATTTTRAAAGAACTTATTGTCAACCTCTTTCGGATATGAAT
CTATCTGATTCAGAAGGGAAGAACTTGCATCAGTATCTCAATTTCAATTCAAACATGGGTTTGATTCACACTCCATGTTC
TGAGAAAGATTTACCATCCGAAAAGAGGAAAAAACGGAGTCTTTGTCTAAAGAAATG----------CGTTGAA------
------AAAGGGCAGATGT-ATAGAACTTTTCAAC---------GAGATAGTGCTTTTTCAACTCTCTCAAAATGGAATC
TATTCCAAACATATATGCCATGGTTCCTTACTTCGACAGGGTACAAATATCTAAATTTGATATTTTTAGATATATTACAA
GACCTATTACCGATACTAAATAGCAGTCAAAAATTTGTATCCATTTTTCATGATATTATGCATGGATTAGATAGATCATG
GCGAATTCTTCAAAAAAAATTGTGTCTTCCACAATGGAATCTGATAAGCGAGATTTCCAGTAAGTGTTTACATAATCTTC
TTCTGTCCGAAG-----------------AATGAGTCACCATTGATATCGACACATCTGAGATCGCCAAACGTTCGGGAG
TTCCTCTATTCAATCCTTTTC---------CTTCTTCTTGTTGCTGGATATCTCGTTCGTACACA--------TCTTCTC
TTT---------GTTTCCCGAGCCTCTAGTGAGTTACAGACAGAGTTCGAAAAGGTCAAATCTTTGATGATTCCAGCATA
CATGATTGAGTTGCGAAAACTTCTGGATAGGTATCCTACATCTGAACTGAATTCTTTCTGGTTAAAGAATCTCTTTCTAG
TTGCTCTGGA-ACAATTAGGAGATTTTCTAGAAGAAATACGGGGTTCTGCTTCTGGCGTCAACATGCTATGGGGTGGTGG
TCCCGCTTATGGGGTCAAATCAATACGTTCTAAGAAGA------AATTTTTGA----ATATCAATCTCATCAATCT----
--------------------------------------------------------------------------------
-------------------------------------------------AAAATAGAATCCTTGGTCGCGAACAGTGATT
CAATTGATGATAAAGAAAGAGAATTCTTGGTTCAG-----------------------------TGATCAAATTCTATTG
AGTCTGACTCATAGTGATCATTTATCAAAGAATGACTCTGGTTATCAAATGATTGAAGAGCCGGGAACAATT------CG
ATACTTAGTTGACATTCATAAAAAGTATCTAATGAATTATGAGTTCAATACACCCTGTTTAGCCGAAAGACGGATATTCC
TTGCTCATTATCAGACAATCACTTATTCACAAACCTCGTGTGGGGCGAATAGTTTTCATTTCCCATCTCATGGAAAACCC
TTTTC------------------------------------------------------------------------GGT
CAAATACTTAGCGACAAACTCCTATGTTCCTTTCATTACAGTAYTTCTTAACAAGTTCCTGGATAACAAGCCTAAG----
------------------------------------------------------------------------------CT
AGGATGAATGCGCTAACTATGGATATGATGCCGGAAATAGACCGATTTTATATCACCCTTCAATTCGAATTAGCAAAAGC
AATGTCTCCTTGCATAATATGGATTCCAAACATTCATGATCTGGATGTGAATGAGTCGAATTACTTATCCCGTGGTCTAT
TAGTGAACTATCTCTCCAGGGATTGTGAAAGATGTTCCACTAGAGATATTCTTGTTATTGCTTCGACTCATATTCCCCAA
AAAGTGGATCCCGCTCTAATAGCTCCGAATAAATTAAATACATGCATTAAGATACGAAGGCTTCTTATTCCACAACAACG
AAAGCACTTTTTCACTCTTTCATATACTAGGGGATTTCACTTGGAAAAAAAAATGTTCCATACTAATGGATTCGGGTCCA
TAACCATGG----------------------------------------------------------------GAAATCA
ATTATAGACACTAATCTAATTAGATCTGCTCTTCATAGACAAACTTGGGATTTGCGATCCCAGGTAAGATCGGTTCAGGA
TCATGGG-----------TCAGATAGGAAGGGCTGTTGCACAAAATGTATTTCT--AAGTAATTGCCCCATAGATCCTAT
ATCTATCTATATGAAGAAGAAATCATGTAATGAAGGGGATTCTTATTTGTACAAATGGTACTTCGAACTTGGAACGAGCC
TGAAGAAATTGACGATACTTCTTTATCTTTTGAGTTGTTCTGCCGGATCGGTTGCTCAAGACCTTTGGTCTCTACCCGGA
CCCGATGAAAAAAATGGGATCACTTATTATGGACTTGTTGAAAATGAT--TCTGATCTAGTTCACGGCCTATTAGAAGTA
GAAGGCGCTCTGGTGAGCTCCTCACGGACAGAAAAAGATTGCAGTCGGTTTGATAATGATCGAGTGACATTGCTTCTTCG
GCTCGAACTAAGGAGTCC--------TGATGCAAAATGGATCTTGTTCTAT-------CCTTGATCAGA------GA---
---TTTCTCT------ATGAAAAATACGAATCGGAGTTTGAAGAAGGGGAAGGAGAAGGAGT--CCTCG------ATCCA
CAACAGATAGAGGAG------GTTTTATTCAATCACATAGTTTGGGCTCCTAGAATATGGCGCCCCTGGGGCTTTCTATT
TGATTGTATCGAAAGGCCCAATGAATTGAGATTTTT--------CCAGGTCATTTCGGGACAAGCGGATCATTTATGATG
AAGAGGAT---------------GATTCGGAGTTCTTGCAGAGTGGAACCATGCAGTACCAGATAGGAGATAGATCTTCC
AAAGAACAAGGCTTTTTTCGAATAAGCCAATTCATTTGGGACCCTGCGGATCCACTCTTTTTCCTATTCAAAGATCCGCC
CTTTGTCTCTGTGTTTTCACATCGAGAATTCTTTGCAGATGAAGAGATGTCAAAGGGGCTTCTTACTTCCCAAACCAATC
CTCCTACATCTATATATAAACGCTGGTTTATCAAGAATACGCAAGAA---------------------------------
--------------------------------------------------------------------------------
--------------------CACTATTGGATCAAATRACAACGGCATTGTTGAGAAAAAGATGGCTTTTCCCGGATGAAA
TTGGATTCATGT----AATAGG-AGAAAGGT-------------------------------------------------
-----------------TTCCCATTCCTTAGCATGAAAGATATGTGGCCATGAAATA-GGGATTAAGTGGAACAGAATTG
AC------TGGGTGGTAAAGTCGTGGAMAGACCTCTTTCTTC--------------------------------TGAAAC
A--TGGAAGAATTGAAATCTTAGATCAAAACACTATGTATG-GATGGTATGAACTGCCTAAACAAGAATTCTTGAACAA-
CGAGCAACC------ATTACTCACTACATCAAAAAATTTCCATTAATGAAAGATGTAAATCCATTGGAAAATCAAAAAAA
CGC-ATGTC------------GGATGAAATGATGGTTCTTGCTATCTGCTCCAA------TAACGWATCAT---------
---TGGTT------------------------------------------------------------------------
--------------------------------CAATTGGAAGATCCCCTATATGGATAATACACATTCCAGTTGACCGGG
CCTAATTCTAATTGTTTTGTTCCGAAGCAAAGATATCCACGGGGCGGTTCGT---------CCTATTCAGATATTCA--C
GACCAAGAAGTACTGGA-TCTCT----TTCGGATAGTCCT--TGAAA---------GGAGAAGGAAGGATGGAATGCCAA
CAGAC-----------TATTATTGAATTCACCCGACCCGATAGT-ACCCA--TTTTTTTGG-GGACCATCCAGTGCCAAA
GTCACTGAATGGGTAAGTCGCCAATCCCT------------AAAACGGACTATGTAATGTACTTTATCTGTTGGGTGACG
GGCGGGCAT--------TTTATCAGAGGTTTCTATTGTATCAATCTACTCT-TGTGTAATTCCTGTTGAAGCATATA-CT
C-GGGGGTGGTTGCAGGGCGAACGATTTCAAAGCGGACTCCCCATTCATTAGATAGAGAAGATCATCAAGAT--------
TTCGT----GATCCAC----------------------------------------------------------------
--------------------------------------------------------------------------------
--------------------------------------------------ATGACAAAGGTGGAGTGTTGGAGTATTTCT
ATTGATCGTTCATGTCA--------TATAGGCCCGAGTCGGACATC---------------CAATTGCTTCGATTTGAAT
---------------TATCCG---------GAACATGC---------------------CTTAT-----------ATATA
TA----TTAT--------------T----CAAAAAAA----TGGACA-------------ATCAAACCCATTTC------
-------TCGATTCAATAGACGCCCAAAGAGGTGAATAGAATAGGGTC-----CCAAATAAGGAGAGATATATATGTAAA
AAGCAGGTCCGATTACGCCTATTC----CTAATCCTAAATGGAATG-----------TAACGACGGA-------------
---------------------------------GGGT-------------------------------------------
----------G---------------------------------ACCCCTT--------------------CTCAT----
----------------AATGAGAATGTATAT--AAGCCTATTCCGGTCTGGTCCGGTATGGAATGAACTTATAATCCTGG
AATCGACTCGATTATCAGATTATAAGTTCATAACCCTAGCCCATTCCCATTTTGGG-------GATCTACTAATTCTTTG
ATTCCAGTTAGTAAGAGGGATCTTGAACTAAGAAATAGGTTCTAGAAGCTAAAAAAGGGTA-------------------
------------------------------ATGCTATTACACATACAATCATACTCAATTCGATGGAATTGTTTGATCTT
AAAGGGGATCTTCTAT--AATTTCGCACGTGAGGGGTTATTTCTTGGTTTCGTCCAGTC---------------------
-------------------------------------------------AGAAATATAGGCCTGCYTGCCATCCACACCA
GAATAAATGGAGTTT---TCCGAAAAAACCTGCTAGTGGAGGAAGACCTCCTAGGGATAAGAGACATAGGGCTAAAGAGA
G-------------------------------------------------------------------------------
-----------------------CATGGAGATATAGAAGAAGATATAAGTTATCATGCTTGCATATCCACCATTTGAGTC
TCCAACAATTATTCCAA---------------------------------------------------------------
-----------------------------CTCAGAATAGCTAGGATTTCCAGAAGAAGAT-GCCATTCGTTTGATGAGAA
ATAAAAAGGAATATCGAAAATTCGAGTGGCTAAAGCTRAAGCAGCTACTTTCGAAGTAACAGAAAGAAAAGCAACGACTG
GAGTGGGAGAGTCAGAGTCGAAAAGAGGATTCCTCACTTCTTTCTCTCATTCAAAACCGTGCATGAGACTTTCATCTCGC
ACGGCTCCTAAGTGATAAAA--------GAAAGAAGAACTCATCTTCTTTCTTTTTTGATTACCTTCCTC------GTAT
AAGACCGAATCCATTCGATTTCT------AAAAAGGATGACTAATCCTTAACTTTTCGA--------GGAATCC------
-------------------------------------------------------------------------TTCACCT
A----------CGGAAC-----CAAGAGGTCGAAAAGATTGAGAAATAGAACCATCTGATTTGATTCGTT----------
--------------------TGATCCTTTTGTCGACGGATGCTCCTATTACACTTGTAGTCTCTGAAGGATGAGAACCAA
CTATGTAGCATCTA-CATCGAGAATTTAAATATTGTATACGTCATTAGTCCGATCTTTTGTAGGAGCTACCCGTAATAAC
GAACTTGCAAAATGAATC-TGTTTATCATAAAGAGATTCGTTGTTCCTGACGCTGCTTCACCTTAATTGTTATTTGAACA
AGTAAAAGTTATGTCTTGGTCCGAGTGCGGATAGCATTTCTCTTCTGCATGTCCATGGAGTTTTGAAAAATCCAAGCATC
TCAGAGATAGAT--AGAGAAGTAG--GAATTTTTCGAACGAACCGCACTCCTTCGTATACGTCAGGAGTCC---------
-------------AAGCTTGAACCCAATTCCTACAGTGATGAATATAAGCGCAATTGAAATTCCTGGGGAGTTATACATT
TGTGTATTGATAAGACCATTCACTATTTCTTGAAGCTCGATCTCTCCCCCGGA-CGAACCATATAGCCAAGAGAAACCAT
GAACCAGAATAGAAGAGCTTGCCCCACCCATGAGTAAATATTTCATAGTAGCCTCATTAGACCG----------------
-----------------GGAGCATAAACTGAAAYATTCTGGAGCTACAAAGATAGTTATTAAATCGTTAGCACCGCATAA
AAACATTCCTCCTAGAGTAGCTGTTAATACGAATAAGAGAAACTCTGTTATAGCCATTTCTGTACATTCAATGTACTCTA
CGGATAGAGGAATACATAGAGTTGAACATAGTAAAATAAGAAATTGAAATATTTCGTTGAAATTGTTCGTTTGGAAATTT
CCCGAAAAGCTAATCATAGGTTCTTCTCTCCATCGGAACAATAGTGCCGTTATACTCATTACTAAACTTGTTGAAGAGAT
GAAATATAACCAAGGTATATCTTTTTGATCAGAAGTTGAATCGATCATCAGAAGAAGAATTAGGCCAAAAATTAGGATAC
ATTCTGGGAAAATAAAACTTCCATCGAAGAGAAGCAAATGAAAGGCTTTCATAAAAATTCTCGTAGAATTGAGAATGA--
----------------------TCATGAATTAGTAACTGCATCCAATCTCCAAAA-AATCCCAATTGTTTCGAACTTTCT
--C--------TTTTTTTTGGAATSGAA--TTTACGGAATCCCCATAAAGAGGATCAAACCTTATTCCATGGTATTTACC
-----TTTTTT------TAT-----TCTTAAGCAAGTCCCCGAGAGGGCTTAATTGATCCATGATTTATCTTTCATCTTT
CATTTCCTTTTCGTTTGTTTCGAGAAATATAGCGATCAATTCCGAT-TCTTTCTTTTTCTATTGATT--------CTTTT
CCGATCGAG----ATGGCTC-----CATGAGTCTAT------------ATAGATCCTGTTCATGGATTAACGAAAATGCG
CAAAAGCTCTATTTGCCTCTGCCATTCTATGAGTCTCTTCCTTTTTGCGTATGGCATCGCCACTCCCTTTGGCAGCATCC
ACTAATTCGGAACTTAATTTGAAA------------CCCGTACGTTTTCGGGATGCCCCTAATAACCAACGAATGGCAAG
TGCTTTTCCTTGTGTGGATCCTATTTCAATGGGAACTTGATGAGTCGATCCGCCTACACGTCTTGCTTTTACTGCTATAT
CGGGAGTTGCTCCACGTATTGCTTGACGTAAAACAGATAGTGGATTTGTTTCTGTCTTTTGTTGAATCTTTTTCATGGCT
CGATAGATAATTTGATAAGCCAATGATTTTTTTCCGTGTTTCAGAATACGGTTAACCAACATGTTAACTAATCGATTACG
ATAAATTGGATCGGATTTTGCAGTTTTTTCTTCTGCAGTACCTCGACGTGACATAAGCGTACAAGGGGTTCT---CAAGA
ATCAGTTTTCCTTTTATAAGGGCTAATAAAATCATTTATTTTGGCTTTTTGACCCCATATTGTAGGGTGGATCTCGAAAG
ATATGAAAGACCTCCCTCCAAGTCATACATACG-----------------CTTTCCACAGAATTCTATATGTATCTATGA
GATCGAGTATGGAATTCTGTTTACTCACTTTAAATTGAGTATCCGTTTCCCTCCTTTTCCTGCTAGGATTGGAAATCCTG
TATTTTACATATCCATACGATGGAGTCCTTGGGTTTCCGAAATAGTGTAAAAAGAAGTGCTTTGAATCATTGCTATTTGA
CTCGGACCTGCTCTAAAAAAGTCGAGGCATTTCGAATTGTTTGTTGACACGGACAAAGTCAAGGAAAACCTCTGAAATTC
TTCCAATATTGGACCTTGGACATATAAGAGTTCCGAATCGAATCTCTTTAGTAAAGAAGATCT-TTTGTCTCATGGTAGC
CTGCTCCAGTCCCCTTACGAAACTTTCGTTATTGGGTTAGCCGTACACTTTACATGTTTCTAGCGATTCACATGGCATCA
TCAAATGATACAAGTCTTGGATAAGAATCTACAACGCACTAGAACGCCCTTGTTGACGATCCTTTACTCC----------
-------------CAATGTGATATCTCACACCGGGTAAATCCTTAACCCTTCCCCCTCTTACTAAGACTACAGAATGTTC
TTGTAAATTATGGCCAATACCAGGTATATAAGCAGTGATTTCAAATCCCGAGGTTAATCGTACTCTGGCAACTTTACGTA
AGGCAGAGTTTGGTTTTTTGGGGGTAATAGTGGAAAAGTTGACAGATAAGTCACCCTTACTGCCACTCTACAGAACCGTA
CATGAGATTTTCACCTCATACGGCTCCTCGTTCAATTCTTTCAAAGTCATTGGATCCCTTTCCTCGTTCGAGAAGCTCCT
CCCTTCATCCACTCCGTCCCGAAGAGTAACTAGGACAAATTTAGTCACGTTTTCATGTTCCAATTGAACAC--TTTCCTT
TTTTGATTATTCTCAAAGGAGAAGATTCTTC------TTTTTACCAAACATATGTGGATCCAATCACGATCTTATAACT-
--TATAAAGAGATCTTTCTCGATCAATCCCTTTGCCCCTCATTCTTCGAGAATCAGAAAGA----TTTTTTTCAAGTTTG
AATTTGTTCATTTGGAATCTGGGCTCTTCTA----CTTCATTTTTATTTATTT-CTTTTTTATTCCCTTCCGTCATTCCT
TAAGTCCCATAGGTTTGATCCTGTAGAAT---------------------------------------------------
---GGTACGAAATAAATCAGATTGATTTTTCGATCAAAAGTACTATGTGAAATCT-------------------------
--------------------------------------------------------------------------------
--------------------------------------------------------------------------------
--------------------------------------------------------------------------------
---------CCGACACCTCCCAAGGAAAATCCCGAATTGG-------ATCCCAAATTGACGGGTTAGTGTGAGCTTATCC
ATGCGGTTATGCACTCTTCGAATAGGAATCCATTTTCTGAAAGATCCTGGCTTTCGTGCTTTGGTGGGTCTCCGAGATCC
TTTCGACGACCTATGTTGTGTTGAAGGGATAT------CTATATGATCCGATCGATTGCGTAAAGCACGCGGTAGCAACG
GAACCGGCGAAAGT--ATAAAGAA---ACAGTTCTTT-TCTATTCTATC--------------TATTATATTAG------
TATTTTCTATTAGTAATAGATTAGTATTAGTTAGTG-ATCCTGGCTCAGTGAG-----TCCTTT----------------
-------CTTCCGTTTTCAGTCCTACATTTTGTCTCTGTGGACCGAGGGGAAAGGGGCTTAGCGAGAAGAGGATTGTACC
ATGAGAGAAGCAAGGAGGTCAACCTCTTTCAAATATACAAGATGGATTCTAGCAATGCAAT-TAGTTGGATTCTCATGTC
GATCCAAATGAATCATCCTTTCCACGGARG------TTTGCCTGCTAGGCACGAAGATAGCAAGTTACAAATTCTGTCTC
GGTAGGATATATATG-------------------------------------------------------------AAAT
AGTTAATGGTGGGGTTACCATTATCCT-----TTTTGTAGTGACGAATCTTGTATGTGTTCC----------------GG
AATTTGTCCATTTTTTGGGGTCTCAAAGGGGCGTGGAAACACATAAGAACTCTTGAATGG----AAAAGAGATGTAACTC
CAGTTCCTTCGGAAAAAGTAAGATCTTTGGCGCAAGAAGTAAGGGGTTGATCCGTATCATCTTGACTTGGTTCTGATTTC
TCTATTTTTT---TAAGAATACCGAGTTGGGGTCTTCTCCTACCCGTATCGAATAGAACATGCTGAGCCAAATCTTC---
--------------TTATTTAGATCGGGAAAATCATACGTTTTTATGAAACCATGTGCTATGGCTCGAATCCGCAGTCAA
TCCTATTTCCGATAGGAGCAGTTGACAATTGAATCCAATTTTTCCCATTATTTTCGTATCCGTA--GGTGCGAAAAGAAG
GCCCGACTCCAAGTTGTTCAAAAATAGTGGCGTTGAGTTTCTCGACCCTTTGCCTTAGGATTAGTCAGTTCTATTTC---
---TCGATGAGGGCAAGGGAAGGGATATAACTCAGCGGTAGAGTGTCACCTTGACGTGGTGGAAGTCATCAGTTCGAGCC
TGATTATCCCTAAACCCAATGTGAG-TTTTTCTATTTTGATTTGCTC---------------------------------
-----TCGTGGGATTGACGTGAGGGGGTAGGGGTGGCTATATTTCTTGGAGCGAACTCTAAGCGAATATGAAGCGCATGG
ATATAAGTTATGC-------CTTGAAATGAAAGACAGTTCCGAATCAGCTTTGTCTACGAATAAGGAAGCTATAAGTAAT
GCAACTAAGAATCTCATGGAGAGTTCGATCCTGGCT----------------GGCATGCTTAACACATGCAAGTCGGACG
GGAAGTGGTGTTTCCTGTGGCGGACGGGTGAGTAACGCGTAAGAACCTGC---------GGGAACAACAGCTGGAAACGG
CTGCTAATACCCCG--TAGGCTGAGG------------------------------------------------------
---------GCTTACCAAGGCGATGATCAGTAGCTGGTCCGAGAGGATGATCA---------------------------
----------------------------------------GGCGAAAGCCTGACGGAGCAATGCCGCGTGGAGGTAGAAG
GCCTACGGGTCGTGAACTTCTTTTCCCGGAGAAGAAGCAATGACGGTATCTGGGGAATAAGCATCGGCTAACTCTGTGCC
AGCAGCCGCGGTAATACAGAGGATGCAAGCGTTATCCGGAATGATTGGGCGTAAAGCGTCTGTAGGTGGCTTTTTAAGTC
CGCCGTCAAATCCCAGGGCTCAACCCTGGACAGGCGGTGGAAACTGCCAAGCTGGAGTACGGTAGGGGCAGAGGGAATTT
CCGGTGGAGCGGTGAAATGCGTAGAGATCGGAAAGAACACCAACGGCGAAAGCACTCTGCTGGGCCGACACTGACACTGA
GAGACGAAAGCTAGGGGAGCGAATGGGATTAGATACCCCAGTAGTCCTAGCCGTAAACGATGGATACTGGGCGCTGTGCG
TATCGACCCGTGCAGTGCTGTAGCTAACGCGTTAAGTATCCCGCCTGGGGAGTACGTTCGCAAGAATGAAACTCAAAGGA
ATTGACGGGGGCCCGCACAAGCGGTGGAGCATGTGGTTTAATTCGATGCAAAGCGAAGAACCTTACCAGGGCTTGACATG
CCGCGAATCCTCTTGAAAGAGAGGGGTGCCTTCGGGAACGCGGACACAGGTGGTGCATGGCTGTCGTCAGCTCGTGCCGT
AAG---GTGTTGGGTTAAGTCCCGCAACGAGCGCAACCCTCGTGTTTAGTTGCCACCGTTGAGTTTGGAACCCTGAACAG
ACTGCCGGTGATAAGCCGGAGGAAGGTGAGGATGACGTCAAGTCATCATGCCCCTTATGCCCTGGGCGACACACGTGCTA
CAATGGCCGGGACAAAGGGTCGCGAT------------------------------------------------------
-----------------------------------------------------------------------------TAC
ACACCGCCCGTCACACTATG-GGAGCTGGCCATGCCCGAAGTCGTTACCTTAACCGCAAGGAGGGGGATGCCGAAGGCAG
GGCTAGTGACTGGAGTGAAGTCGTAACAAGGTAGCCGTACTGGAAGGTGCGGCTGGATCACCTCCTTTTCAGGGAGAGGT
AATGCTTGTTGGGTATTTTGGTTTG----------ACACTGCTTCACACCCAAAAAGAAGGGA-GCTACGTATGA-----
----GTAAAACT---------TGTTGACGGAAGTCTTCTTTCGTTTCTCGACGGTGAAGTAAGACCAAGCTCATGAGAT-
----------------------------------CCCC--CTTTTTTTCG-CCCCCATGTCGCCACGCGGGA--------
-GACATGGGGGCG-----AAAAA-----------AAGGGAAGAGAGGGATGGGGTTTCTCTCGCTTTTGGCATAGCG---
GGCCCCCGGCGAGAGGCCCGCACGACGGGCTATTAG--------------------------------------------
--------------------------------------------------CTGACCCTGAGATGTGGATCATCCAAGGCA
CATTAGCATGGCGTACTTCTCCTGTTCGAACCGGGGTTTGAAACCAAACTTCTCCTCAGGAGGATAGATGGGGY---GAT
TCGGGTGWGATCTAATGTAGATCCAACTTTCTATTCACTCGTGGGATCCGGGCGGTCCGGGGGGGGGCCACCATGGCTCC
TCTCTTCTCGAGAATCCATACATCCCTTATCAGTGTATGGACAGCTATCTCTCGAGCACAGGTTTAGGTTCGGCCTCAAT
GGGAAAATAAAAAGGAGCACCTAACAACGTATCTTCACAGACCAAGAACTACGAGATCGCCCCTTTC----TGGGGCGAC
GGAGGGATCATACCATT---------------------------------------------------------------
------------------------CCCTCCCTTC-------CC---------GAAAGGAAGAACGTGAAATTCTTTTTCC
TTTCCGCAGGGACCAGGAGATTGGATCTAGCCGTAAGAAGAATGCTTGGCTGATAAATAACTCACTTCTTGGTCTTCGAC
CCCCTCAGTCACTACGAACGCCTCCGGTCAGTGCAA----------------------------------------AGCA
GGTTTG------AAAAAGGATCTTAGAGTGTCTAAGGTGGGGCCAGGAGGGTCTCTTAACGCCTTCTTT-TTTCTTCTCA
TCGGAGTTATTTC-AAAAAGACTTGCCATGGTAAGGAAGAA-GGGGGGAACAAGCACACTTGGAGAGCGCAGTACAACGG
AGAGTTGTATGCTGCGTTCGGGAAGGATGAATCGCTCCCGAAAAGGAATCTATTGATTCTCTCCTAATTGGTTGGACCGT
AGGTGCGATGATTTAC-----GGGCGAGGTCTCTGGTTCAAGTCCAGGATGGCCC-------------------------
--------------------------------------------------------------------------------
-------------------------------------------------------------------------TGGCTCA
CTCTTTCTAAGTAATGGGGAAGAGGACCGAAACATGCCACTGAAAGACTCTACTGAGACAAAGATGGGCTGTCAAGAACG
TAGAGGAGGTAGGATGGGCAGTTGGTCAGATCTAGTATGGATCGTACATGGACAATTGTTGGAGTCGGCGGCTCTCCTAG
GGTTCCCTCATCTGGGATCCCTGGGGAAGAGGATCAAGTTGGCCCTTGCGAACAGCTTGATGCGCTATCCCCCTTCAACC
CTTTAGCGAAATGCGGCAAAAGGAAGGAAAATCCATGGACCGACCCCATCGTCTCCACCCCGTAGGAACTACGAGATCAC
CCCAAGGACGCCTTCGGCATCCAGGGGTCGCGGACCGACCATAGAACCCTGTTCAATAAGTGGAAGGCATTAGC-----T
GTCCGCTCTCAGGTTGGGCAGTAAGGGTCGGAGAAGGGCAATCACTCATTCTTAAAACCAGCATTCTTAAGA-CCAAAGA
GTGGGGCGGAAGGGGGGA--------------------------AAGCTCTCCGTTCCTGGTTTTCCTGTAGTTGGATCC
TCCGGAACCACAAGAATCCTTAGTT--------AGAATGGA--------A--------TTCCAA--------CTCAGCAC
CTTTTGAGATTTTGAGAAGAG--------TT-----GCT--------CTTTGG--------AGAG-------CACAGTAC
GATGAAAGTTGTAAGCTGTGTTC------GGGGGGGAGTTATTG-------TTTACCGTTGGCCTCT-------ATGGTA
GAATCAG----TCGGGGGGCCCGAGAGGCGGTGGTTTACCCTGTGGCGGATGTCAGCGGTTCGAGTCCGCTTATCTCCAA
CTCGTGAACTTAGCCGGTACAAAGCTATATGATAGCACCCAATTTTTCCGATTCGGTAGTTCGA-TCTATGATTTATCAT
TCATGGACGTTGATAAGATCCTTCCATTTAGCAGCACCTTAGGATGGCATAGCCTTAAACTTAAA-------------TT
CAGACGTGTGCT--CTTCCGATCTRYMC-------------------------------------CGAAATGCTTCGGGG
AGTTGAAAATAAGCGTAGATCCGGAGATTCCCGAATAGGTCAACCTTTCAAAC----------TCCATGGGCAGGCAAGA
GACAACCTGGCGAACTGAAACATCTTAGTAACCAGAGGAAAAGAAAGCAAAAGCGATTCCCGTAGTAGCGGCGAGC-WAA
TGGGAGCAGCCTAAACCGTGAAAACGGGGTTGTGGGAGAGCAA--GACAAGCGTCGTGCTGCTAGGCGAAGCGGTGGAGT
GCTGCACCCTAGATRGCGAGAGTCCAGTAGCCGAAAGCATCATTAGCTTATGCTC-------------------------
----------------------GACCACCTTGCAAGGCTAAATACTCCTGGGTGACCGATAGCGAAGTAGTACCGTGAGG
GAAGGGTGAAAAGAACCCCCATCGGGGAGTGAAATAGAACATGAAACCGTAAGC--------------------------
----------------------------------------------GTGGCTTGGTTAAGGGAACCCACCGGAGCCGTAG
CGAAAGCGAGTCTTCATAGGGCAATTGTCACTGCTTATGGACCCGAA---------------------------------
----------------------------------------------------------GTGGTTAGGG-GTGAAATGCCA
CTCGAACCCAGAGCTAGCTGGTTCTCCCYGAAATGCGTTGAG-----GYGCAGCAGTTGACTGGACATCTAGGGGTAAAG
TACTGTTTCGGTGC-----------------------------------------------------------CAAAATA
ACAGGGGTCAAGGTCGGCCAATGAGACGATAGGGGATAAGCTTCATCRTCGAGAGGGAAACAGCCCGGATCACCAGCTAA
GGCCCCTAAATGACCGCTCA------------------------------------------------------------
--------------------------------------------------------------------------------
-------------------TCGGTAGGGGAGCGTTCTGCCTTAGAGGGAAGCACCCGCGCGAGCAGGGGTGGACGAAGCG
GAAGCGAAAATGTCGGCTTGAGTAACGCAAACATTGGTGAGAATCCAATGCCCCGAAAACCTAAGGGTTCCTCCGCAAGG
TTCGTCCACGGAGGGTGAGTCAGGGCCTAAGATCAGGCCGAAAGGCGTAGTCGATGGACAACAGGTGAATATTCCTGTAC
TACCCCTTGTTGGTCCCGAGGGACGGAGGAGGCTAGGTTAGCCGAAAGATGGTTATCGGTTCAAGGACGCACGRTGTCCC
TRC-TTTTTYAGGWTAAGAAGGGGTAGAGAAAATGCCTCGAGCCAATGTTCGAGTACCARGYGCTAYGGCGTTGAAGTAA
--------------------------------------------------------------------------------
----------------------------ACAACTCTTTTTAAGGAA--CTCGGCAAAATAGCCCCGTAACTTCGGGAGAA
GGGGTGCCTCCTCACAAAGGGGGTCGCAGTGAACAGGCCCGGGCGACTGTT-----------------------------
--------------------------------------------------------------------------------
--------------------------------------------------------------------------------
--------------------------------------------------------------------------------
--------------------------TAACGATCTGGGCACTGTCTCGGAGAGAGGCTCGGTGAAATAGACATGTCTGTG
AAGATGCGGACTACCTGCACCTGGACAGAAAGACCCTATGAAGCTTCACTGTTCCCTGGGATTGGCTTTGGGCCTTTCCT
GCGCAGCTTAGGTGGAAGGCGAAGAAGGCCCCAT----------------------------------------------
---GATCTANCCTTGTGTCAGGACCTACGGGCCAAGGGACAGTCTCAGGTAGACAGTTTCTATGGGGCGTAGGCCTCCCA
AAAGGTAACGGAGGCGTGCAAAGGTTTCCTCGGGCCGGACGGAGATTGGCCCTCGAGTGCAAAGGCATAAGGGAG-----
------------------AGATCGGGACGAAAGTCGGCCTTAGTGATCCGACG---------------------------
----------------------TAACAGGCTGATCTTCCCCAAGAGCTCACATCGACGGGAAGGTTTGGCACCTCGATGT
CKGCTCTTCGCCACCTGGGGC---------------GGGTTGGGCTGTTCGCCCATTAAAGCGGTACGTGAG--------
----------------GTTCGGTCCATATCCGGTGTGGGCGTTAGAGCATTGAGAGGACCTTTMCCTAGTACGAGAGGAC
CGGGAAGGACG---------------------------------------------GCCAAGTGCGGAGCGGATAACTGC
TGAAAGCATCTAAGTAGTAAGCCCACCCCAAGATGAGTGCTCTCCTATTCCGACTTCCCCAGAGCCTCCGGTAGCACAGC
CGAGACAGCGACGGGTTCTCTGCCCCTGCGAGGATGGAGCGANAGAWSKKWWGAGMAYWCRWSWGAAGGTCACGGCGAGA
CGAG------------------------------------AGTGATGTATGCAGCTGAGGCATCCTAACAGACCGGTAGA
CTTGAACCTTGTTCCTACATGACCCGATCAATTCGATCAGGTACTCGCCATCTATTTTTATTGTTCAACTCTTTTTTGAC
AACATGAAAAAACCAAAAGCTCTGCCCTCCCTCTCTATCGATCCAAGG-GATGGAAGGGCGGAGGCC-----TGTCTCCT
CCAGTCAAGAATTGGGGCCTCACAATCACTATCCAATATGTTTTTCTCTCATGCCTTTCTTCGTTCATAGTTCGATATTC
TGGTGTCCTAGGCGTAGAGGAACCACACCAATCCATCC--CGAACTTGGTGGTTAAACTCTACTGCGGCGAAGATACTGT
AGGGGAGGTCCTGCGGAAAAATAGCTCGACGCCAGGATGATAAAAAGCTTAACACCCCTC--ATTCTTATTACTTTTTCA
ATATG------AAAAAAAATGAAA----------AGGTCG-----TCTTATTCAAAACCCCAATTATGAAATCTCTTCTC
TCCCACTTCACACCTCGGAACGCACCGTTCTTATAG-------AGAGAGAGGCGCTTTCGCATCTTCTT-----AACCC-
-----GAAATGGCTGGGGAGAGGAAAGGTTCCTTTTTTAGGGTACTCCCAGGAACAGATCCAGTGGAGACAAGGTGGGGC
CTGTAGCTCAGAGGATTAGAGCACRTGGCTACGAACCACGGTGTCGGGGGTTCGAATCCCTCCTCGCCCACAACCGGCCA
AAAAGGGAAGGACCCCTCCCTCTGGAGGTAGGAAAATCATGATCGGGATAGCGGATCCAAGGCTATGRAACTTGGGTGTA
-----------GGTCTTGTGTCAAAATGGAATGGCCTCA-------C----------TTTTTCTTCTTTATA--------
----------TATAT--------AT--ATATCGT----------------------------------------------
----------------------------------------------------------------ATCAGCA---------
-TATTTTTTTG----------TTTTACG---------CCCCGTAACTCTTCC------TCAGCGAGGCTTG---------
GGCAGAATAGCAGA----------GCAAGTATTAGTA------------------------------------------G
TTTGCTCGCGGTAATTGTGGCCGCTCGGCAGAATCGATGACTGCATCTTTGATGCACTTGCTA------GTACATCTGAA
AATTCTTAATTGGCTAGTTGTAAATAGCCCCAGACTATGGAACAAAGGATTATACCGGACTTACCTA-------------
----TGATTCTCAAATATCGCAGAACAGAATGTGATATGATGAGATAGAATGCAATAGAAAGAAAGCCACAGGGAACGGG
TTACCTACTCTTAACGGTCAAAGCAAACCTTTTCATTC--------CGAA------------------------------
-------------------------------TTAACAGCCGACCGCTCTACCACTGAGCTACTGAGGAACAACGGGAG-A
TTAGATCTCATAGAGTTCAATTCCCGTTCTTAACCCATGACCAATATGAG-CTCGAAGTTTCCTTCGTAACTCCCGAAAC
TTCTTCGTAGTGTCTTCGTTCCATGCCTCATTTCATAGGGAA---------CCTCAAAGTGGCTCTATTGGCTCTATTTC
ATTATATTCCATCCATAT--------------------------------------------------------------
----------------------TTCTATTTCTATATGCTATTTCTATATATATGGAAAGTTTCAAAATCATCATATAATA
ATCCAG-------------------AAATTGCAATAG---AAAAGAAAAAA-GGGGGTTTTTGATATGATTTTGAAATCT
TTTATACTAGGTAATCTAGTATCCTTATGCATGAAGATAATCAATTCGGTCCTTATGGTCGGACTCTATTATGGATTTCT
GACCACATTCTCCATGGGGCCCTCTTATCTCTTCCTTCTCCGAGCTCGGGTTAGAGAAGAAGGAACCGAGAAGAAGGAAC
CGAGAAGAAGGTATCAGCAAC----------AACAGGTTTTATTACGGGACAGCTCGTGATGTTCATATCGATCTATT--
-----------ATGC--------------GCCTCTGCATCT--------------AGCATTG-------------GGTAG
ACCTCATACAATAACTGTCCTA--------------GCTC--------------TACCGTATCTTTTGTTTCATTTCTTC
TGGAACAATCACAAACACTTTTTTGATTATGGATCTACTACCAGAAATTCAATGCGTAATCTTAGCATTCAATGTGTATT
CCTGAATAATCTCATTTTTCAATTATTCAACCATTTCATTTTACCAAGTTCAATGTTAGTCAGAT-TAGTCAATATTTAT
ATGTTTCGATGCAACAACACGATGTTATTTGTAACAAGTAGTTTTGTTGGTTGGTTAATTGGTCACATTTTATTCATGAA
ATGGGTTGGATTGATATTAGTCTGGATACAGCAAAATCATTCTATTAAATC---GAATGT-------------------T
ACCTTGTATCAGAATTGATAAATTTTATGGCT----------GTATTCTCTTATTTATTACCTGTGTCTACTCTTTAGGC
AGAATGCCGTCACCCATTTTG------ACTAAGAAACTTAAAGAAACCTC---------------AGAAACGGA------
---AGAAAGGGAGGA--AAGTGAGGA-AGAAACAGATGTAGAAATAGAAAAAACTTCCGAAACAAAAGAGATAGACTATA
AAAATAAACAATT------TTTTGAAATTTTACAT------TCTTT----AGAGTTTATAGGAA----------------
---------------------------------------------GAGA-AGAGAAAGATCCCTTTTGGTTTGAAAAACC
TCTTGTAACTAGTCTTTTCGACTACAAACGATGGAATCGTCYATTTCGATATATAAAAAATGATCAATTTGAAAATGTTG
TACAACAGGAAATGGCACAA--TATTTTTTTTATACATGTCAAAGTGCTGGAAAAGAAAGAATATCTTTTACATATCCAC
AGAGTTTGACAACTTTTTTAGAAATGATACAAAGAAAAATGTCTCTGTTTACAACAAAAGAACTC---------------
----------------------------------------------AAAACTTAATTAAAGAGTTTCTAAATAGAGTCGA
AACACTAGATCC--AAAACTTCTTGTTCCGAATACACTAAAAAAAAAGACTAGATTGTGTAATGATGAAACTAAAAAAGA
ATACTTACCTAAAACTTATGATCCCTTATTGAATGGATCTCGTCGAGGAAGAATGAAATTTCGTTTTTCATCATCAATTA
TAAATGAAACTTCGATCAAGAATTACATAGAGAGAATTTG------GATAAATAAAA-----------------------
--------------------------------------------------------------------------------
--------------------------------------------------------------------------------
-------AATGTATTCAGAAGATCGAATACAATTTTTAAAATTTTTATTCGAGGCAGTTATAATCTATCCTAACAAT---
---AAAACAAT------TATAAAAAAATC---------------------------CAAACAAGTGTCTCGCTCATCATA
TAAATTACTGGATGAGTGGGAACAACAAGAGAAAGAAAATGAAGAAAACGTGATAGAGGATCATGAAATTCGTTCACGAA
AAGCCAAACGTGTA------------------------------------------------------------------
---------------GACGAAGTGTCTTTAATACGTTATTCACAACAATCCGACTTTCATCG------------------
--------------------------------------------------------------------------------
--------------------TCTTTTG-------ATWYYKMKSWGTTAATGAAAATAATATTTTTAAATT----------
-----CGATATGT--------------AAAAACACAGAATTATCAATTTTGAATTATAT---------------AG--AA
AAAACAAAAAAAGAAA-GTAAGAAAAGAGA-------------------AGAAGACAACAGAGAGGAAAAAGTCCGGATA
GAAATTGCTGAAACTTGGGATAGTATTTTATTTGCTCAAGTAATAAGAGGTTCTTTTTTAGTAACCCAATCGGTTCTTAG
AAAATATATAATCTKAMC----WYRMTAATAGCTAAAAATATAATTCGTATGCTTTTTTTTCAATTTCCCGAATGGTTCG
AAGATTTAAGGGATTGGAATAGAGAAATGCATGTTAAATGCACCTATAATGGAGTTCAATTATCAGAAAGCGAATTTCCA
CAAAACTGGTTA--------------------------------------------------------------------
--------------------------------------------------------------------AAAGAAAGATGA
G--------TTTTGTTTTTTAACAGTTTTTGGAATGGAAGTTGAACTCCCTTTTGGCTCCCCCCGAAAACGACTTTCACT
TCTTA---------------------------------------------------------------------------
------------------------------------------CAAGTCATCAAAAACATTCTATTTCTAAAAAAAATAAT
AAACAAAATTTCAAACTTAAAAAGAAATCCAATTCTATTATTTGGATTTAGAGAAGTATATGGATTGAATGAAACTAAAA
AAGATTCAATAATCAA------------TAATCAAA------------TGATTTT---------TCAA--TTTTCTA---
--------CTCAATTTCAATCT--A----------TGGACTGGACAAA-----TTTTTC---------ATTGACAGAAA-
------AAAAAA-TAAAAGATC-------------AAACACAATACTAAATCAAATCGAAAACATTACAAAAGAAAGGAC
AAAAAGATTTATAACTTCAGAGATCAAGATTAATCGTAAGAAAATAAGCGAACATGCTAACAGATTM--AAATTAAAGTC
ATCAAAAAATTTTTC------AAATAT---------ATTGAAAAGAAAAAATA-CTCAATTAGTCCATAAAGCACATT--
--------------------------------------------------------------------------------
--------------------------------------------------------------------------------
---------------------------------------------------------------------CACTTATTAAT
AATAA------TAATAATGTTTTTACTACGAATTCACAGCCTTTTTGTGATGTATCCTCCTTGTCACAAA----------
--------------------------------------------------------------------------------
--------------------------------------------------------------------------------
-----------------------------------AACTGGTTAAAGAGTCATTACCAATATAAATATGATTTATCTCCA
ATTAGATGGTCGAGATTAATACCACAAAAAAGGCGAAATAAGATCAGTCAAGACCGTATGGT------TCAAAATAAAGA
TAAAAATTTAAACAAATGGATTTTTT------ATGAAAAAAACCAATTAATTCATTACGAAAAGCAAAATGATCTTGAAG
CAGACTCATTAGCAAACCAAAAAGAAAATTTTAAAAAACACTATCGATATTATTTCT-----------------------
------AAACAAG--ATT------------CATCTAT------AT---------------------ATAGATTACCATGC
CAA-----GTAAATA-ATAAACAAGAGATT--------------------------------------------------
--------------------------------------------------------------------------------
-------------TACAAATAAGGTCAATATTGACTCCTGGATTAATATCGGAACGAAACAAAAAAAAAAN-TAAGAATA
AAACTAGCTCTA------ATATGTATCAAATAATTGATA---AAATTGATAAAAA-AGGTCTTTTTTTTTTTTACGATTC
--------------------------------------------------------------------------------
-----------------------------------------------------------------------TACAAGATA
AAACCATGGTCGATACCAATCAAATTACTTCTCTTAAA-----------------CTGCTCATGAAAATCACAAAATCAA
CGAAAAGAGTAAGAAAAACGGAGATCCTCTTATATC----TATATCAC------------AATCTATTGAATTAGCGAAT
GGAAATCAAGAAAAAAACGAATCTAAGGGTCAAGTGTATCTTGTATCAGTTCTCACAAATCAAGAAAAGGATATTGAAAA
AACTTATGCGGGATCAGTCATGAAAAAACGTAGAAAGAAAAACCAATCCAAAAATAATATGGAAGCAGAACTCAATTTCT
TCT-----------------------TTAAGATGGGATGATTCTTTAAATCAAAAAATAATCAATAATATCAAAGTATAT
TGTCTTCTGCTTAGACTACCCAATCCACGCGAAATAAGTTTATCCTGTATCCAAAGTAGAGAAATGAGTCTGGATATTCT
AATGACCCAGAAGAATCTAACTCTTACAGAATTGATGAAACAGGGAATCCTGATTATTGAACCAGTTCGTTTGTCAGTAA
AAAATGATGGACAATTTT------------------GGTATTTTATTGGTTCATAWTAGCAWACAACAAATTAATCAAAG
ATACATAGAAAAAAGCTAT--GTTGATAAAAAAAATTTTACCGCACCGATTGAAAGAGATCAAAATATAACTGGACATAG
AGATAAAAATTATGATAAAAATCATTATGATTT------------AAAGATTTTCGCCCCTAAACATCGTAGAGAATTGA
GAATTTTAATGTTGTTCAATTCAAAAAAGAGAAATGATATTC--------------------------------------
------------------------------------------------------------------AAAGCTTTTTCTTT
GGCCCAATTATCGATTAGAAGATTTAGCTTGTATGAATCGCTATTGGTTTGATACCAACAATGCCAGTTGTTTTAG----
--------------------------------------------------------------------------------
--------------------------------------------------------------------------------
----------------------ATT------------ATGAAAAAT-GGAAG----TTTTTTT-----C-----------
----------------------------CT-TTTAGGTATGTATCG---TTTTT--TTTTTCTTTTGTAAGCGAAGAAAC
A------------------TATCATT------------------------------------------------------
-----------------------------------------TTTT-----------------------------------
--------------------------------------------------------------------------------
--------------------------------------------------------------------------------
----------------------------------------------------------------------------A---
---GGGAGC--TTTTTTTATG------GTAAAAAATTCATTTATTTCAATTATTTCACAAAAGCAAAAAGACGAAAACAC
AGGATCCGTTGAATTTCAAATAAAAAGTTTCACTAATAAGATACRAYGACWTACTTCACATTTGGAATTCCWTAGAAAAG
ACTATTTATCTCAGAGTGGGTTACGGAAAATTCTAGGAAAACGTCAACGACTCCTATCTTATTTGGCCAAACAAAATA--
GAATGCATTATAAAGAATTAATTAACCAGTTGGATATTCGGGAGTCAAAAACTCGTTGATTTGAAGAG-----TCC-TTT
TTTGGAATTATTTGATTTATGAGATCTTGAATTTTGATGAATTTC-TTTTCGTTTTCAGT-A------ATTCATAG-AAG
AATGAATAGAGGAAATCCCTATGAATG-----GCTACAAGAAAAGACCTTATGATAATCAATATGGGCCCTCACCACCCA
TCAATGCATGGTGTTCTTCGACTCATCGTTACTCTAGACGGCGAAGATGTTATTGACTGTGAACCAATTTTAGGTTATTT
ACACAGAGGAATGGAAAAAATTGCGGAAAACCGAACAATTATACAATATTTGCCTTATGTAACACGTTGGGATTATTTAG
CTACGATGTTCACAGAAGCAATAACAGTAAATGGGCCAGAACAGTTGGGAAATATTCAAGTACCTAAAAGGGGCAGCTAT
ATCCAAATAATTATG--------AGATCGG--AACCTCTCATCTCTTATGGCTTGGCCCTTTTATGGCAGATATTGG---
--------------------------------------------ATGATTTATTCGAATCTGCAACTGGTATGAGAATGA
TG-CATAATTTTTTTCGTATCGGCGGAGTAGCGGCCGATCTACC--T---------------------------------
--------------------------------------------------------------------------------
--------------------------------TGGGGTTTATCAGGACCCATGCTACGAGCTTCCGGAATACAATGGGAT
CTTCGTAAAGTTGATCATTATGAGTCTTATGACGAATTTGATTGGGAAGTTCAGTGGCAAAAAGAAGGAGATTCATTAGC
TCGTTATTTAGTCCGAATTGGTGAAATGACAGAATCCATAAAAATTCTTCAACAAGCTCTGGAAGGAATTCCTGGAGGAC
CCTATGAAAATTTAGAAACCCGACGTTTTGATAGAG--------------------------------GTATCGATTCAT
TAGTAAAAAAACTTCTCCTACTTTTGAATTACCGAAACAAGAACTTTATGTAAGAGTCGAAGCCCCA-------------
-------------------------CGGGTTTCCTTGGAGATGGAAAATTCGCCCGCCGGGTTTTATCAATTTGCAAATT
CTTCCTCAATTAGTTAAAAGAATGAAATTGGCTGATATTATGACAATACTAGGTAGTATAGATATCATTATGGGAGAAGT
TGATCGTTGAAATGAT------------------AATTGATACAACAAAAGTACAAGC----------------------
----------------------------------------ATGCTTGTTCCTACTTTGACTCTTGTATTTGGAATCACAC
TA----------------------------GAGAAATATCTGCAGGACTACAACAACGTATTGGACCTGAATACGCCGGT
CCTGTGGGGGTTCTTCAAGCTCTAGTGGATGGGACAAAACTACTTTTCAAAGAGAATTTTTTT-----------------
-----------------------------------TATCAACTCTATTAACCTATTCAGTAATTCCTTTTAGTTATCATC
TTGTTTTAGCTAATCTAAATATCGGTGTTTTTTTATGGATTGCCATTTCAAGTATTGCTCCGATTGGGCTTCTTATGTCA
GGCTATGGATCAAATAATAAATATTCCTTTTTAGGTGGTCTACGAGCTGCTGCTCAATCGATTAGTTATGAAATACCATT
AACTCTCTGTGTGTTATCCATATCTCTACGTG------------------------------------------------
--------------------------------------------------------------------------------
--------------TAAAC-------TAAATTAGATAGTTATATGAGTG---AAAAAAAACTGCTGCTAAATTTGTAG--
TACAAAATTGAGACTCATTTCCTATGTGCAAGAGGAAACGGGA-----------AATAAACA-----TAAGAAAACGAGA
TTATTTG--------CCC--------CAAGATTGGTT-------------------------------------------
--------------------------------------------------TTAC--CATAATCGTAACGGGTGATTGA--
----------GCAAAAATGA-GGGATGGTTAGGAACACCAAGATACACA-------------------------------
--------AAGGATTAGTAATA---------------------------------------------GAGATTAT----T
AAAATAGTTCA--------------AAAGAAT-------------------AGT------TCTGCATA------------
--CTAT--------------------------------------------------------------------------
------------------------------------------A----TTAT---------ATATAA--------------
---TATAATAATA-------------------TAA-AAAGAATA-TTAATTGGGG-CTTTAGGTTGGTAGAACTGATTAG
GTAGTACTCCCCAAAATTCCGATTTAGAGTATGCTGCCGCCCATCGATTAAAGAAATAACTATCAGGAACGAAAGAATCC
TTTCC------TC-TTTAAGTTC---------------------------------------------------------
--------------------------------------------------------------------------------
--------------------------------------------------------------------------------
--------------------------------------------------------------------------------
--------------------------------------------------------------------------------
--------------------------------AGTATCCT------ATTTA---AGGATT-------AAAAGTTATTACT
CAAGAAAGAAAAACGTAAATTCTTAAAGGATAAGATTAATTCAGAAG----------------------------ATTTT
ATTGGYCGAATTTT--GGGTTTGGAAAGTTCAATAGATTTTGATCCTATACTGTCTAC----------------------
-----------------------------------------------------C--------------------------
--------------------------------------------------------------------------------
----------------TGATTATCTAACAATTCAAGTATAGTTGATATGGTTGAAGCACAATTAAAATATGGTTTTTTGG
GATGGAATTTGTGGCGTCAACCTATAGGGATTATCC-TTTTTTTCATTTCTTCGCTAGCAGAATGTGAAAGACTACCTTT
TGATTTACCAGAAGCAGAAGAAGAATTAGTGGCGGGGTATCAAACCGAATACT---------------------------
-----------------------GTTTCTTCATTATTTGTAACAATTCTTTACTTGGGCGGTTGGAATATCTCTATTCCG
TACATA---------------TTTGTTCCTGAACTTTTTAAAATAAATAACGTGGGTAGGTTTTTTGGAACAATGATTGG
TATCTTTATTACATTGGTTAAAACATATTTGTTCTTGTTCATTTCTATCACAACAAGATGGACTTTACCTAGATTAAGAA
TGGACCAATTATTAAATCTTGGATGGAAATATCTTTTACCTATTGCTCTCGGTAATSTATTATTAACAACCTCTTCTGAA
CTCTTTTCATTATAAGTACTCT-----------AAAGAAATCCTTT-TCTATATTCACAACTTGTCTG------AAACAA
GAG--------AAAAAAACAAAGGAAAACCTTTTCATAAATATTCACGATATGCTCCCCATGGTAACTGGGTTCATGAAT
TATAGCCAACAAACCATTCGAGCTGCAAGGTACATTGGTCAAAGTTTCATGATTACCTTATCCCACGCAAATCATTTACC
AATAACTATTCAATACCCTTATGAAAAATTAATTACATCAGAACRTTTTCGCGGTCGAATTCATTTTGAATTTGATAAAT
GCATTGCTTGTGAAGTATGTGTTCGTGTATGTCCTATAGACC--------------------------ACCGACATTCGA
AAGAAAAGATTGTTTAATTACAGTATTGATTTTGGAATCTGTATATTTTGTGGCAACTGTGTTGAGTATTGTCCAACAAA
TTGTTTATCAATGACTGAAGAATATGAGCTTT---------ATCGTCACGAATTAAATTATAATCAAATAGCTTTAGGTC
GTTTACCTATCTTAGTAATTGACGATTATACAATTCGAACAGTTTTAAATTCGCATCAAAAAA---AGGGAAATC-C---
--------------------------------------------------------------------------------
TTT-----------------------------------------------------------------------------
-----------------------------------------------------------TCTATTAATATTCGAAATTTC
AATTTCAAGTGTCAAATTTTCCTTTTCGAGAAAGA--CTGAAATTAGGCCAATAGTTG----------------------
------------------------------------------------AGTTTTTCCTGGTCG----------CGGTCAT
G----AGAAAAAAATTCGA-TTTTTTTATCTCTTATTTTACGTACAATGGA-TTTGCTTGGGCCAATACATGATTTTCTT
TTAGTCTTTCTGGGTTTAGGTCTTATATTAGGAGGTCTAGGAGTAGTATTACTTACCAATCAAATTTATTCTGCCTTTTC
GTTGGGATTGGTTCTTGTTTGTATATCTTTATTCTATATTTTATCAAACTCTCCTTTTGTAGCTGCCGCACAACTCCTTA
TTTATGTGGGAGCTATAAATGTTTTAATTCTATTTGTTGTGATGTTTATGAATGGTCCAGAATATTCAAAAGATTTGAAT
CTTTGGAATGTTGGGGGTGGAATTACCCTCTTAGTTTGTACAAGTATTTTTGTTTCACTAATTACTATTGTTCTAAATAC
-----GGTACGGAATTATTTGGACTACAAGACCAAATCAAATTATAGAGCAAGAGTT-GATAAGTAATGGTCAACAAATT
GGAATTCATTTATCAACAGATTTTTTTCTTTCATTTGAATTTATTTCAATAATTCTTTTAGTTGCTTTGATAGGTGCGAT
TGTTGTGGCTCGTCAGTAAGAAA-TCTTTAGAATTAGAA-----ATTGAAATCAAAATAAAAC---------TTTTGTCT
ATGTTATTACATCCATTTTCCTTTAATTCTAT--------TTAAAGAT-TATTAAT------------------------
GTATACATTTTTTT-ATTTAATGAATTA-CCAATAGA-TTTTTT-GTTCTGTACT--TGTGATATTGTTATTTTAATCAA
TCCAATCTGGTGATATTGAATTGTTGTTCATGTTG-AAATAAATCG-----AAATTTATAAGGAGTTACTCAATGATCCT
CGAACATCTACTTGTCTTGAGTGCCTATTTATTTTCTATTGGTATCTATGGATTGATCACGAGTCGAAATATGGTTAGAG
CCCTTATGTGTCTTGAACTTATACTGAATGCAGTAAATATAAATTTTGTAACATTTTCTGAT------------------
--------------------------------------------------------------------------------
--------------------------------------------------------------------------------
--------------------------------------------------------------------------------
--------------------------------------------------------------------------------
--------------------------------------------ATTTTCTAGATCGAGAA--------TTAA--AATTT
ATGATGTTC--AAAAAAA-TTCTAGATACAATGTCACATTCAGTAAAGAT--------------TAGGGTGTACTCAATG
TGTACGAGCYTGCCCCACCGATGTATTAGAAATGATACCTTGGGACGGATGTAAAGCAAAGCAAATTGCTTCTG------
--------------------------------------------------------------------------------
---TGAAACCACCCGAAGTATGGGTCTAGCTTATTGATACTTTCCAA-----AAAAAAACCACTTGAA-TTTATTTGATT
TTTTGTTTACCGACAAAAACCCGTATTCGAAATT-----ATAACAAA---TAT------TATGT-TTTCGATTACGGGTT
CTTCTGGTCCAAGTGTATCTTGTTTTTACCACGAA---------TTCTTTTCCTTGGTTAACATTATTTGTAGTTTTACC
GATATCCGCAGGTTCTTTAATT----------------------------------------------------------
CTATCCGAACTTCTTTTAATGACCTATGTATTCTCTTTTTATTTCGAATTGGATGATCCATTAATACAATTAACAGAGGA
TTATAAATGGATAAATTTCTTTGATTTTTACT-GGAGATTGAGAGTAGATGGACTTTCTCTAGGGCTGACTTTACTGACA
GGATTTATTACTACTTTAGCTATTTTAGCGGCTCGGCCAGTTACTCGCGATTCCCGATTATTCCATTTTCTGATGTTAGC
AATGTATAGTGGTCAAATAGGTTTATTTTCTTCTCAAGATCTTTTGCTTTTTTTCATCATGTGGGAGTTAGAATTAATTC
CTGTTTATCTACTTCTATCGATATGRGGAGGAANGAAACATCTATA----------------------------------
--------------------------------------------------------------------------------
-----------------------TCTTTGGAAATAATATTTTATATTGGATTTCTTATTGCTTTTGCTGTCAAATCACCG
ATTATACC--TCCATACATGGTTACCCGACACCCATGGGAAAGCACATTATAGTACT----TGCTTCTAGCTGGAATCCT
ATTAAAAATGGGAGCGTATGGGTTAGTTCGAATCAATATGCAATTATTACCGCACGCTCATTCTAGATTTTCTCCCTGGT
TGATAATAGTAGGCGCAATACAAATAACCTATGCAGCTTCAACATCTCCTGGTCAACGAACTTT-AAAAAAAAGAATAGC
CTATTCTTCTGTATCTCATATGGGTTTTATAATTATAGGAATTTGCTCTCTAAACGATATGGGA--TAATGGAGCCATTT
TACAAATATTATCACATGGATTTATTGGCGCTGCCCTTTTTTTCTTGGCCGGAACAAGTTATGATAGAATACGTCTCATT
TATCTTGACGAAATGGGTGGAATGGCTAACCCAATGCCAAAAATATTCATGATGTTCAGTATCTTATCACTAGCCTCCCT
TGCATTACCAAGCATGAGCGGTTTTTTTTCGGAATTGATAGTATTTCTTGGAATAATTACTAGTCACAAATA-TCTTTTA
ATGCAAAAAGTACTAATTACTTTTGGAATGGCAGTTGGAATAATATTAACTCCTATTTATTTATTATCTATGTTACRCCA
AATATTCTATGG--------------------------------------------------------------------
--------------------------------------------------------------------------------
--------------------------------------------------------------------------------
--------------------------------------------------------------------------------
--------------------------------------------------------------------------------
--------------------------------------------------------------------------------
--------------------------------------------------------------------------------
--------------------------------------------------------------------------------
--------------------------------------------------------------------------------
------------------------------------------TTTGGGATTTGTGAGAACTTTTTGAA-----TCAACTA
C-------------------------------------------------------------------------------
--------------------------------------------------------------------------------
--------------------------------------------------------------------------------
----------------------------------------------TTCCCAATTTTTCTTTGTTCGAATATGTAAATAA
ATCGCGAATRTAGTCCAAGTAATAAATGCCCAAG--TTTCCTTTGGATCCCAATTCCAATATGATCCCCATGCTTCATTA
AC-----------------------------------------------TACTAATAATACGGTCACTCCAATGATCTAA
TTGTTGAATCAATTGAA---------ATTTGTAATAATTTCTAGAAAAAAGAAAAGAAGTATGTTTTAAAACGTGCCTTC
TTTCCATCATGTATTGGATTTTACCGAAGGAAAATGAATCA------TTTACTAAATTATTCCCTTTATTCAAAATTCTT
ATGAATTTTTGAAATGCAATTACTAGAAGTGCTACTGATAATAACGATCCACATAAAAGAGCTGCATAGCTCAATACCAT
CATACTTACGTGCATCATTAACCACTGAGATTTAAGAACTGGTACTAAATTTTCGGATTGATACGTGTCAGTTAAAAGAC
CCGAAGTAGCAAAGCCTTGGGCAAAAAAAGTACTTGGGGTGATTATT---------------------------------
-------------------GCGGAACC------ATATGAATAAT---GGAAAAACTCCAGGAAAGAAWGATTAATGATTC
ATATAAGTTACTTAATGGTAAATGTCCCAAATAAATCCAACGAATGGCTAATAATCCTGTTATACAGAAAAAAGCGG---
-------------------------------------------GACTAATAAGGTTATTAAATGAATTGTAATTCCAATT
GAAACGACCGAAAAAGATATATGAACTAATATGT----------------------------------------------
--------CCCTCAAT-----TATATTTTAAA-------AAATTAAAAGCAGGAATTGAATTCA-TT----------ATA
RGACTTAT---------TCT-----ACCCTTT-----------------------------TGA---TTTGAAATTA---
-AAAACAAAAATTATGCCGCCACTCGGACTCGAACCGAGATGCTTTAGCACTG--------GAGCAGCGTGTCTACCAAT
TTCACCATAGCGGCTTGCTC------AAAATAATAATAAACTA--CTTTATTTTTT-----CAATCGTTGAGCTTGAAGG
AGTCAATTCAATGCAA----------------------------------------------------------------
--------------------------------------------------------------------------------
--------------------------------------------------------------------------------
--------------------------------------------------------------------------------
--------------------------------------------------------------------------------
--------------------------------------------------------------------------------
---------------------------------------TGGTATTGATTYGGGTATATCATAT-----AAAACAAGG--
---GGGTT---------------------------------CTGTCCCGTACCTCAAAAA------TGTTGTCTATCTTC
ATCCATCT------TCCAGCCCAAATATATGATCTAAAATACATAATTCA---------------------A--------
---A----------------ATTGACACAT--------------------------------------------------
--------------------------------------------------------------------------------
--------------------------------------------------------------------------------
--------------------------------------------------------------------------------
---TTTA------------------------------------------------------------------------G
ATTCAAAATAATT----------AAGAATAGCAAATTTTATT--------TTAGTTT----TC---TATA-TCTTTAT--
--CTTGTTTTTTG------------------------------TCTTTATTGACAT--TTTAGTAATTGAATCCC-----
-------------------------------------T------------------------------------------
--------------------------------------------------------------------------------
---------------------------------GGGACTCCTCTTTTTTCCGG-CAGCAACAAAAAAACTTCGTCGTATG
TGG-----------------------------------------------------------------------------
---------------------------------------------------CTTTAGAGTTTGGACACTTGATGGACCCC
CTTACTCTCATTTTGTCAATATTAATTACTACTGTTGGAATTATGGTTCTTATTTATAGTGACAATTATATGTTTCATGA
TCAAAGCTATTTGAGATTTTTTGCTTATATGAGTTTTTTCAATACTTCAATGT---GATTAGTTACTAGTTGTAATTTGA
TACAAATTTATATTTTTTGGGAATTGGTTGGAATGTG-----------------------------------------CA
TCGAATGCTTGTCAAAAAGCCTTTGTAACTAATCGTGTAGGGGATTTTGGTTTATTATTAGGAATTTTAGGTCTTTATTG
GATAAC-----GTTTTGATTTTCGGGATTTGTTCGAAATATTCAAAAACTTGATTTTTAACAAT------GAAGTAAATT
TTTTATTTCTTACTTTGTGTGGTTTCCTATTATTTTCTGGTGCAATTGCTAAATCAGCTCAATTTCCTCTTCATGTATGG
TTACCCGATGCCATGGAAGGACCGACTCCTATTTCGGCCTTAATCCATGCTGCTACTATGGTAGCCGCGGGTATTTTTCT
TGTAGCCCGACTTCTACCTCTTTTCGTACTCATACCCTATAT--------------------------------------
--------------------------------------------------------------------------------
------------------------------------GCTTTATTTCATTTGATTACGCATGCTTAT--------------
----------------------------------GAAGCTATTATTGGTTATTCTCCAGGTAAGAGTCAAAATATGATTC
TTATGGGTGGTTTAACAAAACATGTTCCTATTACAAAAATTGCTTTTTTATTAGGAACCCTCTCTCTTTGTGGTATTCCA
CCCCTTGCCTGTTTTTGGTCCAAAGATGAAATTCTTAATGATATTTGGTTGTATTCACTCAGTTTCGCAATAATAGCTTG
GTCCACAGTAGGATTGACTGCCTTTTATATGTTTCGAATCTATTTACTTA-CTTTTGAAGGGCATTTCAATCTTTATTTT
CAAAATTACAGTGGTAAACAAAATAGCTCGTTTTATGGAATATGTATATGG-----------------------------
----------------------------------------------------------------TGAATGATGAAAGGGT
TTTCTTTTTT-CGGAAGAAGACATATCAAATTCATGGTAATGCAAGAAATATAACACATCCTTT----------------
--------------------------------------------------------------------------------
--------------------------------------------------------------------------------
--------------------------------------------------------------------------------
------------------------------------GCAGCTTCTTTATATAAGCCCGTTTACTCATCGTTACAAAATTT
TAACT---------------------------------------------------TAATAAATGTCATATATGATTGGT
CCTATAATCGTGCTTACATAGATTATTTTTATGCAATATTTTTTACTGGGGGTATAAGAAAATTAATTCAATTAACTGAG
TTGTTTGATAGACGAGTAATCGATGGTCCT--------------------------------------------------
--------------------------------------------------------------------------------
--------------CTA---------------------------------------------------------------
--------------------------------------------------------------------------------
--AAGAATGTAAAATTTCAAAAAATTGTTTATTTTTATAGTCTA-TCTCTTTTGTTTCGGAAGTTTTTTCTATTTCTACA
TCYKYWYY---------TTCCTCC------------------------CTTTCT---------TCCGTTTCTGAGGTTTC
TTTAAGTTTCTTAGTCAAAATGGGTGACGGCATTCTGCCTAAAGAGTAGACACAGGTAATAAATAAGAGAATACTAAAGA
TTCGAGCCATAAAATTTATCAATTCTGATACAAGGTACTTATTAGATCGAATAAGTACA-----TTCGATTTAATAGAAT
GATTTTGCTGTATCCAGACTAATATCAATCCAACCCATTTCATGAATAAAATGTGACCAATTAACCAACCAACAAAACTA
CTTGTTACAAATAACATCGTGTTGTTGCATCGAAACATATAAATATTGACTAATCTGACTAACATTGAACTTGGTAAAAT
GAAATGGTTGAATAATTGAAAAATGAGATTATTCAGGAATACACATTGAATGCTAAGATTACGCATTGAATTTCTGGTAG
TAGATCCATAATCAAAAAAGTGTTTGTGATTGTTCCAGAAGAAATGAAACAAAAGATACGGTAGAGCTAGGACAGTTATT
GTA--------------TGAGGTCTACCCAATGAGKCYTMCCMATGCYTAGATGCAGAGG---------CGCATAATAGA
TCGATATGAACATCACGAGCTGTCCCGTAATAAAACCTGTTGTTGCTGATACCTTCTTCTCGGT--------------TC
CTTCTTCTCTAACC---------CGAGCTCGGAGAAGGAAGAGATAAGAGGGCCCCATGGAGAATGTGGTCAGAAATCCA
TAATAGAGTCCGACCATAAGGACCGA-------ATTGATTATCTTCATGCATAAGGATACTAGATTACCTAGTATAAAAG
ATTTCAAAATCATATCAAAAA-CCCCCTTTTTTCTTTT---CTATTGCAATTTCTGGATTATTATATG-----------A
TGATTTTGAAACTTTCCATATATATAGAAATAGCATATAGAAATAGAAACAGATAGACTAGAAACGACATCTCTTATGTC
AATGACACC--------AAAGGK---------------------------------------------------------
-----CCACTTT---GAGGTTCCCTATGAAATGAGGCATGGAACAAAGACACTACAAAGAAGTTTCGGGAGTTACGAAGG
AAACTTCGA-GCTCATATTGGTCATGGGTTAAGAACGGGAATTGAACTCTATGAGATCTAAT-CTCCCGTTGTTCCTCAG
TAGCTCAGTGGTAGAGCGGTCGGCTGTTAACTGACTGGTCGTAGGTTCGAATCCTACTTGGGGAGATTTGATTCATT-CT
GAATTCTTT---------AAT-TCGGAATGAAAAGGTTTGCTTTGACCGTTAAGAGTAGGTAACCCGTTCCCTGTGGCTT
TCTTTCTATTGCATTCTATCTCATCATATCACATTCTGTTCTGCGATATTTGAGAATCACCGTC-----CTCGGTGTAGG
TAAGTCCGGTATAATCCTTTGTTCCATAGTCTGGGGCTATTTACAAC------------------------------GCA
AGTGCATCAAAGATGCAGTCATCGATTCTGCCGAGCGGCCACAATTACCGCGAGCAAACATA-----TTAATGACGACGA
ACACATTTT-----TGCTATGCTACTAATACTTGCT----CTGCTATTCTGCCCAAGCCTCG------CTGAGGAA----
---GAGTTACGGGGCGTAAAACAAAAAA-A--------TATGCTGATTTGGT----------------CCGA-------C
TATATGGA-------AGGA----------TTCAAGCACC-----------------------------------------
--------------------------------------------------------------------------------
----------AAGTTCCATAGCCTTGGATCCGCTATACCGATCATGAT--------------------GGGTCCTTCCCT
-----TTTTGGCCGGTTGTGGGCGARGAGGGATTCGAACCCCCGACACCGTGGTTCGTAGCCACGTGCTCTAATCCTCTG
AGCTACAGGCCCCACCCTGTCTCCACTGGATCTGTTCCTGGGAGTACCCTAAAAAAGGAACCTTTCCTCTCCCCAGCCAT
TT------CGGGTT-AAGAAGATGCGAAAGCGCCTCTCTCTCT-------ATAAGAACGGTGCGTTCCGAGGTGTGAAGT
GGGAGAGAAGAGATTTCATAATTGGGGTTTTG------AATA--AGACGACCTTTTCA-------TTTTTTT-----TCA
TATTGAAAAAGTAATAAGAAT--GAGGGGTGTTAAGCTTTTTATCATCCTGGCGTCG-----------------------
--------------------------TTTAACCACCAAGTTCGGGATGGATTGGTGTGGTTCCTCTACGCCTAGGACACC
AGAATATCGAACTATGAACGAAGAAAGGCATGAGAGAAAAACATATTGGATAGTGATTGTGAGGCCCCAATTCTTGACTG
GAGGGGACACCAAAGGCCTCCGCCCTTCCATCCCTTGGATCGATAGAGAGGGAGGGCAGAGCTTTTGGTTTTTTCATGTT
GTCAAAAAAGAGTTGAACAATAAAAATAGATGGCGAGTACCTGATCGAATTGATCGGGTCATGTAGGAA-----------
--------------------------------------------TTCCACTTGACACCTATCGTAATGATAAAC------
-------------------------------------------------------------AGAACCCGTCGCTGTCTCG
GCTGTGCTACCGGAGGCTCTGGGGAAGTCGGAATAGGAGAGCACTCATCTTGGGGTGGGCTTACTACTTAGATGCTTTCA
GCAGTTATCCGCTCCGCACTTGGCTACCCAGCGTTTACCGTGGGCACGATAACTGGTACACCAGAGGTGCGTCCTTCCCG
GTCCTCTCGTACTAGGGAAAGGTCCTCTCAATCCTCTAACACCC------------------------------------
--------------------------------------------------CATAC-------------------------
--------------------------------------------------------------------------------
-----CGACGGCCCTTCCACTCGGCACCGTCGGATCACTAAGGCCGACTTTCGTCCCTGCTCGACGGGTGGGTCTTGCAG
TCAAGCTCCCTTCTGCCTTTGCACTCGAGGGCCAATCTCCGTCCGGCCCGAGGAAACCTTTGCACGCCTCCGTTACCTTT
TGGGAGGCCTACRCSCCATAGAAA---TCTACCTGAGACTGTCCCTTGGCCCGTAGGTCCTGA--CACAAGGTTAAAATT
CTAG----------------------------------------------------------------------------
----------AGGCCCAAAGCCAATCCCAGGGAACAGTGAAGC-------------------------------------
-----------------------------------------------CCCAGATCGTTACGCCTTTCGTGCGGGTCGGAA
CTTACCCGACAAGGAATTTCGCTA--------------------------------------------------------
--------------------------------------------------------------------------------
-------TGTGTTTTTGGTAAACAGTCGCCCGGGCCTGTTCACTRCGACCCCCTTTGTGAGGAGGCACCCCTTCTCCYGA
AGTTACRRGGCTATTTTGTAGAG-----TTCAGAGAGAGTTGTCTCGCGCCCCTAGGTATTCTCTACCTACCCACCTGTG
TCGGTTTCGGGTACAGGTACCCTTTTGTTGAAGGTCGTTCGAGCTTTTCCTGGGAGTATGGCATGGGTTACTTCAACGCC
GTAGCGCCTGGTACTCAAACATTGGCTCGAGGCATTTTCTCTACCCCTTCTTACCCTGAA-AAAGCAGGGACACCGTGCG
TCCTTGAACCGATAACCATCTTTCGGCTAACCTAGCCTCCTCCGTCCCTCGGGACCAACAAGGGGTAGTACAGGAATAYT
CACCTGTTGTCCATCGACTACGCCTTTCGGCCTGATCTTAGGCCCTRACTCACCCTCCGTGGACGAACCTTGCGGAGGAA
CCCTTAGGTTTTCGGGGCATTGGATTCTCACCAATGTTTGCGTTACTCAAGCCGACATTTTCGCTTCCGCTTCGTCCACC
CCTGCTCGCGCGGGTGCTTCCCTCTAAGGCGGAACGCTCCCCTACCGATGCATTTTTACATCCCACAGCTTCGGCAGATC
GCTTAGCCCYGTTCATCTTCGGCGCAAGAGCGCTCGATCAG--YRAGCTATTACGCACTCTTTCAAGGGTGGCTGCTTCT
AGGCAAACCTCCTGGCTGTCTCTGCACCCCTACCTCCTTTATCACTGAGCGGTCATTTAGGGGCCTTAGCTGGTGATCCG
GG------------------------------------------------------------------------------
--------------------------------------------------------------------------------
--TGTCCAGTCAACTGCTGCGCCTCAACGCATTTCGGGGAGAACCAGCTAGCTCTGGGTTCGAGTGGCATTTCACCCCTA
ACCACAACTCATCCGCTGATTCTTCAACATCAGTCGGTTCGGACCTCCACTTAGTTTCAC--------------------
--------------------------------------------------------------------------------
--------------------------------------------------------------------------------
--------------------------------------------------------------------------------
-------------------------------------------------------CTTGCTGATTCACACGGGATTCCAC
GTGCCCCATGCTACTCGGGTCAGAGCATAAGCTAATGATGCTTTCGGCTACTGGACTCTCGCCATCTAGGGTGCAGCACT
CCACCGCTTCGCCTAGCAGCACGACGCTTGTCTTGCTCTCCCACAACCCCGTTTTCAC--GGTTTAGGCTGCTCCCATTT
CGCTCGCCGCTACTACGGGAATCGCTTTTGCTTTCTTTTCCTCTGG-TTACTAAGATGTTTCAGTTCGCCAGGTTGTCTC
TTGCCTGCCCATGGATTCAGCAGCAGTTTGAAAGGTTGACCTATTCGGGAATCTCCGGATCTACGCTTATTTTCAACTCC
CCGAAGCATTTCGTCGCTTACTACGCCCTTCCTCGTCTCTGGGTGCCTAGGTATCCACCGTAAGCCTTTCCTCGTTTGAA
CCTCGCCCTTAACTT-----TAAGTTTAAGGCTATGCCATCCTAAGGTGCTGCTAAATGGAAGGATCTTATCAACGTCCA
TGAATGATAAAT--------------------------------------------------------------------
-------------CGGACTCGAACCGCTGACATCTGCCACAGGGTAAACCACCGCCTCTCGGGCCC-CCCGACTGATTCT
ACCATAGAGGCCAACGGTAAACAATAACTCCCCCCCGAACACAGC----TTACAACTTTCATC--------GTACTGTG-
-------CT--------CTCCAA--------AGA--------GCAAC--------TCT--------TCTCAAAATCTCAA
AAGGT-----------------------------------TTCCATTCTAACTAAGGATTCTTGTGGTTCCGGAGGATCC
AACTACAGGAAAACCAGGAACGGAGAGCTTT----CCCCCCTTCCGCCCCACTCTTT-GGTCTTAAG-------------
---AATGCTGGTTTTAAGAATGAGTGATTGCCCTTCTCCGACCCTTACTGCCCAACCTGAGAGCGGAC-----AGCTAAT
GCCTTCCACTTATTGAACAGGGTTCTATGGTCGGTCCGCGACCCCTGGATGCCGAAGGCGTCCTTGGGGTGATCTCGTAG
TTCCTACGGGGTGGAGACGATGGGGTCGGTCCATGGATTTTCCTTCCTTTTGCCGCATTTCGCTAAAGGGTTGAAGGGGG
ATAGCGCATCAAGCTGTTCGCAAGGGCCAACTTGATCCTCTTCCCCAGGGATCCCAGATGAGGGAACCCTAGGAGAGCCG
CCGACTCCAACAATCGTCCATGTACGATCCATACTAGATCTGACCAACTGCCCATCCTACCTCCTCTACGTTCTTGACAG
CCCATCTTTGTCTCAGTAGAGTCTTTCAGTGGCATGTTTCGGTCCTCTTCCCCATTACTTAGAAAGAGTGAGCCACCGGT
TCAGGTACAAGATACTATCATTA--------------AGACATCCAACCCGTAATCGCAACGACCCAATTGCAAGAGCGG
AGCTCTACCAACTGAGCTATATCCCCCCGAGCCAAGTGGAGCATGCATGAAGGAGTCAGATGCTTCTTCTATTCTTTTCT
TTGGCGCAGCTGGGCCATCCTGGACTTGAACCAGAGACCTCGCCCGTGAAGTAAATCATCGCACCTACGGTCCAACCAAT
TAGGAGAGAATCAATAGATTCCTTTTCGGGAGCGATTCATCCTTCCCGAACGCAGCATACAACTCTCCGTTGTACTGCGC
TCTCCAAGTGTGCTTGTT-CCCCCCTTCTTCCTTACCATGGCAAGTC-TTTTTGAAATAACTCCGATGAGAAGAAA-AAA
GAAGGCGTTAAGAGACCCTCCTGGCCCCACCTTAGACACTCTAAGATCC----TTTTTCAAACCTGCTCCCATTTCRAGC
CAAGAGATAGATAAATAGACACATCCCATTGCACTGACCGGAGGCGTTCGTAGTGACTGAGGGGGTCGAAGACCAAGAAG
TGAGTTATTTATCAGCCAAGCATTCTTCTTACGGCTAGATCCAATCTCCTGGTCCC-------TGCGGAAAGGAAAAAGA
ATTTCACGTTCTTC-------CTTTCGGGAAG---------GGAGGGTTAGGAAAATCCTATTAATTGCAGCTTTCTCCA
----GACCTC--------CGGGAAAAGCATG---------AAGAAAAAAGGCTCGAATGGTACGATCCCTCTGTCACCCC
AAAATGAAAGGGGCGATCTCGTAGTTCTTGGTCTGTGAAGATRCGTTGTTAGGTGCNCCTTTTTATTTTCCCATTGAGGC
CGAACCTAAACCTGTGCTCGAGAGATAGCTGTCCATACACTGATAAGGGATGTATGGATTC--TCGAGAAGAGAGGAGCC
ATGGTGGTCCCCCCCGGACCGCCCGGATCCCACGAGTGAATAGAAAGTTGGATCTACATTGGATCTCACC----------
----TATCCTCCTGAGGAGAAGTTTGGTTTCAAACCCCGGTTCGAACAGGAGAAGTACGCCATGCTAATGTGCCTTGGAT
GATCCACATCTCAGGGTCAGGCGCTGATGAGCACATTGAACTATCCATGTGGCTGAGAGCCCTCACAGCCCAGGCAC--A
ACGACGCAATTATCAGGGGCGCGCTCTACCACTGAGCTAATAGYCCGTCGTGCGGGCCTCTCGCCGGGG---GCCCGCTA
TGCCAAAAGCGAGAGAAACCCCA------TCCCTCTCTTTCCT----TTTTTTCGCCCCCATG-TCGCCACGCGGGAGGG
A-----GGGC---GAAAAAAAGGGGGATCCTATC--AACTTGTTCCGACCTAGGATAATAAGCTCATGAGCTTGGTCTTA
CTTCACCGTCGAGAAACGAAAGAAGACTTCCGTCA---------ACA---------AGTTTTACTCATACGTAGC-TCCC
TTCTT---------------------------------------------------------------------------
----------------------------------------TTCACTCCAGTCACTRGCCCTGCCTTCGGCATCCCCCTCC
TTGCRGTTAAGGTAACGACTTCGGGCATGGCCAGCTCCCATAGTGTGACGGGCGGTGTG---------------------
--------------------------------------------------------------------------CTGAGG
ACGGGTTTTTGGAGTTAGCTCACCCTCGCGGGATCGCGACCCTTTGTCCCGGCCATTGTAGCACGTGTGTCGCCCAGGGC
ATAAGGGGCATGATGACTTGACGTCATCCTCACCTTCCTCCGGCTTATCACCGGCAGTCTGTTCAGGGTTCCAAACTCAA
CGGTGGCAACTAAACACGAGGGTTGCGCTCGTTGCGGGACTTAACCCAACACCTTACGGCACGAGCTGACGACAGCCATG
CACCACCTGTGTCCGCGTTCCCGAAGGCACCCCTCT--------------------------------------------
--------------------------------------------------------------------------------
--------------------------------------------------------------------------ATCGTT
TACGGCTAGGACTACTGGGGTATCTAATCCCATTCGCTCCCCTAGCTTTCGTCTCTCAGTGTCAGTGTCGGCCCAGCAGA
GTGCTTTCGCCGTTGGTGTTCTTTCCGATCTCTACGCATTTCACCGCTCCACCGGAAATTCCCTCTGCCCCTACCGTACT
CCAGCTTGGCAGTT-TCCACCGCCTGTCCAGGGTTGAGCCCTGGGATTTGACGGCGGACTTAAAAAGCCACCTACAGACG
C-------------------------------------------------------------------------------
------------------------------------------------CCATAGGCCTTCTACCTCCATGCGGCATTGCT
CCGTCAGGCTTTCACCCATTGCAGAAAATTCCCCACTG----CTCCCGTACGAGTCTAGGCCGTGTCTCAGTCCCAGTGT
GGCTGATCATCCTCTCGGACCAGCTACTGATCATCGCCTTGGTAAGCTATTGCCTCACCAACTAGCTAATCAGACGCGAG
CCCCTCCTCGGGCGGATTCCTCCTTTTGCTCCTCA--GCC--TACGGGGTATTAGCAGCCGTTTCCAGCTGTTGTTCCCC
TCCCAAGGGCAGGTTCTTACGCGTTACTCACCCGTCCGCCACAGGAAACACCACTTCCCGTCCGACTTGCATGTGTTAAG
CATGCCGCCAGCGTTCATCCTGAGCCAGGATCGAACTCTCCATGAGATTCTTAGTTGCATTACTTATAGCTTCCTTATTC
GTAGACAAAGCTGATTCGGAACTGTCTTTCA-------TTTCAAGGCATAACTTATATCCATGCGCTTCATATTCGCTTA
GAGTTCGCTCCAAGAAATATAGCCACCCCTACCCCCTCACGTCAATCCCACGAGCCTCTTATC------CATTCGATCAC
GACGGCGGG-GGAGCAA----------------ATCAAAATAGA-AAAACTCACATTGGGTTTAGGGATAATCAGGCTCG
AACTGATGACTTCCACCACGTCAAGGTGACACTCTACCGCTGAGTTATATCCCTTCCCTTGCCCTCATCGAGAAATAGAA
CTGACTAATCCTAAGGCAAAGGGTCGAGAAACTCAACGCCACTATTTTTGAACAACTTGGAGTCGGGCCTTCTTTTCGCA
CCATTACGGATACGAAAATAATGGGAAAAATTGGATTCAATTGTCAACTGCTCCTATTAGAAATAGGATTGACTGCGGAT
TCGAGCCATATCACATGG-----------CGTATGATTTTCCCGATCTAAATAAAGCAGGTTTTACATGAAGAAGATTTG
GCTCAGCATGTTCTAT-------TCGATACGGGTAGGAGAAGACCCCAACTCGGTATTCTT---AAAAAAATAGAGAAAT
CAGAACCAAGTCAAGATGATACGGATCAACCCCTTACTTCTTGCGCCAAAGATCTTACTTTTTCCGAAGGAACTGGAGTT
ACATCTC------TTTTCCATTCAAGAGTTCTTATGTGTTTCCACGCCCCTTTGAGACCCCAAAAAATGGACAAATTCC-
----------------ACAAGATTCGTCACTACAAAAAGGATAATGGTAACCCCACCATTAACTATTTCATTTATTAACT
ACTTCAT-----TTATGAATTTCATAGT------AATAGAAATAAAAT-------------------------------A
CTTGCTATCTTCGTGCCTAGTAGGCAAAGATTTACCTCCGTGGAAAGGATGATTCATTTGGATCGACATGAGAATCCAAC
TACATTGCATTGCTAGAATCCATCTTGTATATTTGAAAGAGGTTGACCTCCTTGCTTCTCTCATGGTACAATCCTCTTCT
CGCTAAGCCCCTTTCCCCTCGGTCCACAGAGACAAAATGTAGGACTGGTGCCAACAGTTCATCACGGAAGAAA-----AC
GGAAGAAAG----GACTCACTGAGCCAGGATCACTAACTAATACTAATCTATTACTAATAGAAA------------ATAC
TAAT-------------ATAATAGA------------------TCTTTTCTTTATACTTTCGCCGGTTCCGTTGCTACCG
CGTGCTTTACGCAATCGATCGGATCATATAGATATCCCTTCAACACAACATAGGTCGTCGAAAGGATCTCGGAGACCCAC
CAAAGCACGAAAGCCAGGATCTTTCAGAAAATGGATTCCTATTCGAAGAGTGCATAACCGCATGGATAAGCTCACACTAA
CCCGTCAATTTGGGATCC-------AATTCGGGATTTTCCTTGGGAGGTGTCGGGAAAGAATTGGAATGTA---------
--------------------------------------------------------------------------------
-----------------AG--------------CTAGCGAAAGAGGAAAAACCCGAAGATTTCACATAGTACTTTTGATC
GAAAAATCAATCTGATTTATTTCGTACCCCTCGCTCAATGAGAAAACGGGTCAGATTCTACAGGATCAAACCTATGGGAC
TTAAGGAATGAYGGAAGGGAAT-AAAAAAGAAATAAATA-------------------AAAATGAAGTAGAAGAGCCCAG
ATTCCAAATGAACAA----------ATTCAAACTTG--------------AAAAAAATCTTTCTGATTCTCGA-------
AGAATGAGGGGCAAAGGGATTGATCGAGAAAGATCTCTTGTTA-----------GATCGTGATTGGATCCACATATGTTT
-----------GG------TAAAAAGAAGAATCTTCTCCTTTGAGAATAATCA--------------------------A
AAAAGGAAAGTGTTCAATTG---------GAACATGAAAACGTGACTAAATTTGTCCTAGTTACT-CTTCGGGACGGAGT
GGATGAAGGGAGGAGCTTCTCGAACGAGGAAAGGGA------TCCAATGACT-------------TTGAAAGAATTGAAC
GAGGAGCCGTATGAG--------GTGAAAATCTCATGTACGGTT-------------------CTG---------TAGAG
TGGCAGTA-----AGGGTGACTTATCTGTCA------ACTTTTC------------------------------------
---
>4_Aden_muri
---------------------------------------------------------------AAGAACTGTCT------
-------------TTTCTTTATACTTTCG-CCGGTTCCGTTGCTACCGCGTGCTTTACGCAATCGATCGGATCATATAGA
TATCCCTTCAACACAACATAGGTCGTCGAAAGGATCTCGGAGACCCACCAAAGCACGA---------AAGCCAGGATCTT
TCAGAAAATGGATTCCTATTCGAAGAGTG-------------CATAACCGCATGGATAAGCTCACACTAACCCGTCAATT
-------TGGGATCCAATTCG---------GGATTTTCCTTGGGAGGTGT------------------------------
--------------------------------------------------------------------------------
----------------------------------------------------------------------------AAAG
AGGAAAAACCCGAAGATTTCACATAGTACTTTTGATCGAAAAATCAATCAGATTTA----------TTTCGTACCCCTCG
CTCAATGAGAAAACGGGTCAGATTCTACAGGATCAAACCTATGGGACTTAAGGAATGACGGAAGGGAAT-AAAAAAGAAA
TAAATAAAAATGAAGTAGAAGAGCCCAGATTCCAAATGAACAAATTCAAACTTG--AAAAAAAAATCTTTCTGATTCTCG
AAGAATGAGGGGCAAAGGGATTGATCGAGAAAGATCT------CTTGTTC--TTATTATAAGATC---------------
---------------G---------------------------------AAAAAGAAGAATCTTCTCCTTTGAGAATAAT
CAAAAAAGGAAA--GTGTTCAATTGGAACATGAAAACGTGACTAAATTTGTCCTAGTTACTCTTCGGGACGGAGTGGATG
AAGGGAGGAGCTTCTCGAACGAGGAAAGGGATCCAATGACTTTGAAAGAATTGAACGAGGAGCCGTATGAGGTGAAAATC
TCATGTACGGTTCTGTAGAGTGGCAGTAAGGGTGACTTATCTGTCAACTTTTCCACTATTACCCCCAAAAAACCAAACTC
TGCCTTACGTAAAGTTGCCAGAGTACGATTAACCTCGGGATTTGAAATCACTGCTTATATACCAGGTATTGGCCATAATT
TACAAGAACATTCTGTAGTCTTAGTAAGAGGGGGAAGGGTTAAGGATTTA-CCGGTGTGAGATATCACATTGTTCGAGGA
ACCCTAGATGCTGTCGGAGTAAAGGATCGTCAACAAGGGCGTTCTAGTGCGTTGTAGATTCTTATCCAAGACTTGTATCA
TTTGATGATGC-CATGTGAATTGCTA--GAAACATGTAAAGTGTACGGCTAACCCAATAACGAAAGTTTCATAAGGGGAC
TGGAGCAGGCTA-CCATGAGACAAAAGATCTTCTTTACTAAAGAGATTCGATTCGGAACTCTTATATGTCCAAGGTCCAA
TATTGGAAGAATTTCAGAGGTTTTCCTTGACTTTGTCCGTGTCAACAAACAATTCGAAATGCCTCGACTTTTTTAGAGCA
GGTCCGAGTCAAATAGCAATGATTCAAAGCACTTCTTTTTACACTATTTCGGAAACCCAAGGACTCCATCGTATGGATAT
GTAAAATACAGGATTTCCAATCCTAGCAGGAAAAGGAGGGAAACGGATACTCAATTTAAAGTGAGTAAACAGAATTCCAT
ACTCGATCTCATAGATACATATAGAATTCTGTGGAAAGCCGTATTCGATGAAAGTCGTATGTACGGCTTGGAGGGAGGTC
TTTCATATCTTTCGAGATCCACCCTACAATATGGGGTCAAAAAGCCAAAATAAATGATTTTATTAGCCCTTATAAAAGGA
AAACTGATTCTTG---AGAACCCCTTGTACGCTCATGTCACGTCGAGGTACTGCAGAAGAAAAAACTGCAAAATCCGATC
CAATTTATCGTAATCGATTAGTTAACATGTTGGTTAACCGTATTCTGAAACACGGAAAAAAATCATTGGCTTATCAAATT
ATCTATCGAGCCATGAAAAAGATTCAACAAAAGACAGAAACAAATCCACTATCTGTTTTACGTCAAGCAATACGTGGAGC
AACTCCCGATATAGCAGTAAAAGCAAGACGTGTAGGCGGATCGACTCATCAAGTTCCCATTGAAATAGGATCCACACAAG
GAAAAGCACTTGCCATTCGTTGGTTATTAGGGGCATCCCGAAAACGTCCGGGCCGAAATATGGCTTTCAAATTAAGTTCC
GAATTAGTGGATGCTGCCAAAGGGAGTGGCGATGCCATACGCAAAAAGGAAGAGACTCATAGAATGGCAGAGGCAAATAG
AGCTTTTGCGCATTTTCGTTAATCCATGAACAGGATCTATATAGAC-----TCATGGAGCCATACATCTCGAT-------
-CGGAAAAGAATCAATAGAAAAAGAAAGAATCGGAATTGATCGCTATATTTCTCGAAACAAACGAAAAGGAAATGAAAGA
TGAAAGATAAATCATGGATCAATTAAGCCCTCTCGGGGACTTGCTTAAG-----AATAAAAA-AA-GGTAAATACCTTGG
AATAAGGTTTGATCCTCTTTATGGGGATTCCGTAAATATTCCATTCC---------AAAAAAAAGAGAAAGTTCGAAACA
ATTGGGATTT-TTTGGAGATTGGATGCAGTTACTAATTCATGATCTGGCATGTACAGAATGAAAACTTCATTCTCAATTC
TACGAGAATTTTTATGAAAGCCTTTCATTTGCTTCTCTTCGATGGAAGTTTGATTTTCCCAGAATGTATCCTAATTTTTG
GCCTAATTCTTCTTCTGATG-ATCGATTCAACTTCTGATCAAAAAGATATACCTTGGTTATATTTCATTTCTTCAACAAG
TTTAGTAATGAGTATAACGGCACTATTGTTCCGATGGAGAGAAGAACCTATGATTAGCTTTTCGGGAAATTTCCAAACGA
ACAATTTCAACGAAATATTTCAATTTCTTATTTTACTATGTTCAACTCTATGTATTCCTCTATCCGTAGAGTACATTGAA
TGTACAGAAATGGCTATAACAGAGTTTCTCTTATTCGTATTAACAGCTACTCTAGGAGGAATGTTTTTATGCGGTGCTAA
CGATTTAATAACTATCTTTGTAGCTCCAGAATGTTTCAGTTTATGCTCCTACCTATTATCTGGATATACCAAGAAAGATG
TACGGTCTAATGAGGCTACTATGAAATATTTACTCATGGGTGGGGCAAGCTCTTCTATTCTGGTTCATGGTTTCTCTTGG
CTATATGGTTCGTCCGGGGGAGAGATCGAGCTTCAAGAAATAGTGAATGGTCTTATCAATACACAAATGTATAACTCCCC
AGGAATTTCAATTGCGCTTATATTCATCACTGTAGGAATTGGGTTCAAGCTTTCCCTAGCCCCTTTTCATCAATGGACTC
CTGACGTATACGAAGGAGTGCGGTTCGTTCGAAAAATTCCTACTTCTCT--ATCTATCTCTGAGATGCTTGGATTTTTCA
AAACTCCATGGACATGCAGAAGAGAAATGCTATCCGCACTCGGACCAAGACATAACTTTTACTTGTTCAAATAACAATTA
AGGTGAAGCAGCGTCAGGAACAACGAATCTCTTTATGATAAATA-GATTCATTTTGCAAGTTCGTTATTACGGGTAGCTC
CTA-CAAAAGATCGGACTAATGACGTATACAATATTTCAATTCTCGATG-TAGATGCTACATAGTTGGTTCTCATCCTTC
AGAGACTACAAGTGTAATAGGAGCATCCGTCGACAAAAGGATCACCCTAAGATGATCATCTCATGGCTATTGAGAACGAA
TCAAATCAGATGGTTCTATTTCTCAATCTTTTCGA----------CCTCTT-----GGTTCCGTAG--------GAGCAA
G----------TCAGAAAGATTGAGAAAAAT--------TACAA--------CCACTGATGAAGGATTMTGAAGG-----
-----ATTCCTCGAAAAGTTAAGGATTAGTCATCCTTT------TTAGAAATCGAATAGATTCGGTCTTATACATACGCG
AGGAAGGTAATCAAAAAAGAAAGAAGATGAGTTCTTCTTTC-TTTTATCACTTAGGAGCCGTGCGAGATGAAAGTCTCAT
GCACGGTTTTGAATGAGAGAAAGAAGTGAGGAATCCTCTTTTCGACTCTGACTCTCCCACTCCAGTCGTTGCTTTTCTTT
CTGTTACTTCGAAAGTAGCTGCTTCAGCTTCAGCCACTCGAATTTTCGATATTCCTTTTTATTTCTCATCAAACGAATGG
CATCTTCTTCTGGAAATCCTAGCTATTCTGAGCATGATAGTGGGGAATCTCATTGCTATTACTCAAACAAGCATGAAACG
TATGCTTGCATATTCGTCCATAGGTCAAATCGGATATGTAATTATTGGAATAATTGTTGGAGACTCAAATGGTGGATATG
CAAGCATGATAACTTATATCTTCTTCTATATCTCCATGAATCTAGGAACTTTTGCTTGCATTGTATTATTTGGTCTACGT
ACCGGAACTGATAACATTCGAGATTATGCAGGATTATACACGAAAGATCC-TTTTTTGGCTCTCTCTTTAGCCCTATGTC
TCTTATCCCTAGGAGGTCTTCCTCCACTAGCAGGTTTTTTCGGAAAACTCCATTTATTCTGGTGTGGATGGCAGGCAGGC
CTATATTTGTTGGTTTCAATAGGACTCCTTACGAGCGTTCTTTCTATCTACTATTATCTAAAAATAATCAAGTTATTAAT
GACTGGACGAAACCAAGAAATAACCCCTCACGTGCGAAATTATAGAAGATCCCCTTTAAGATCAAACAATTCCATCGAAT
TGAGTATGATTGTATGTGTAATAGCATCTACTATACCAGGAATATCAATGAACCCGATTATTGAAATTGCTCAAGATACC
CTTTTTTAGCTTCTAGAACCTATTTCTTAGTTCAAGATCCCTCTTACTAACTGGAATCAAAGAATTAGTAGATCTGTTCC
G-CCCAAAATGGGAATGGGCTAGGGTTATGAACTTATAATCTGATAATCGAGTCGATTCCAGGATTATAAGTTCATTCCA
TACCGGACCAGG------------------CCGGAATAGGCT--TATATACATTCTCATTATGAGAAGG--------G--
------------------GT--------------------CATTCGAGCGTATCTAAATAGATA----------------
----------CTATGTTTA---CATATG----------------------GACCCCTCNNNCGTTACATWTGGACCCCTC
CGTCGTTACATTCCATTTAGGATTAGGAATAGGCGTAATCGGACCTGCTTTTTACATATATATCTCTCCTTA-----TTT
GGGACCCTATTCTATTCACCTCTTTGGGCGTCTATTGA-------------ATCGAGAA-------------ATGGGTTT
GA-------------TTGTCCR---KTTTGATTGTCCATTTTTTTG-------------ATATAATAT----A-------
-TAT-------------A----------------AGGCA---------------TGTTCCGGATAATTCAAATCGAAGCA
ATTGGATGTCCGACTCGGGCCT-------ATATG--------ACATGAACGATCAATAGAAATACTCCAACACTCCACCT
TT---------GTCATATATTCCATACATCACACTAGATAGATATCATATTCATGGAATACGATTCACTTTCAAGATGCC
TTGGTGGTGAAATGGTAGACACGCGAGACTCAAAATCTCGTGCTAAAGAGCGTGGAGGTTCGAGTCCTCTTCAAGGCATA
-----GAGAAT---------GCTCATTGAATGAGCAA---TTCAATATCAATAAGAGATCTCTT-------WYTTGATGA
TCTTCTCTATCTAAT--GAATGGGGAGTTCGCTTTGA---AATCGTTCGCCCTGCAAC----------------------
--------------------------------------------------------------------------------
--------------------------------------------------------------------------------
-----------------------------------------------------CA-CCCCCGAG-TATATGCTTCAACAG
GAATTACACAAGAGTAGATTGATACAATAGAAACCTCTGATA-----AAATG------CCCGCCCGTCACCCAACAGATA
AAGTACATTACATAGTCCGTTTTAGGGATTGGCGAC------------TTACCC---------ATTC-------------
---------AGTGACTTTGGCACTGGATGGT-CCC--C-AAAAA---------AATGGGTACTAT-CGGGTCGGGTGAAT
TCAACAATAGGCGTCTGTTGGCATTCCATCCTTCCTTCTCCTTTCAGGGACTATCCGAAAGAGAATCCGGTACTTCTTGG
TC-------GTGAATATCTGAATAGGACGAACCGCCCCGTGGATATCTTTGCTTCGGAACAAAACAAT-TAGAATTAGGC
CCGGTCGACT---------------GGAATGTGTATTATCCATATAGGGGATCTTCCAATTGAGAAG-----------AT
CCATCGACCTG-------AGACGAAG------------AGAAGGTTCTATCTATT--TTATTTAGTTA-TTCAGTTAGTT
ATTCAGTTA-------AACCAATGATTCGTTATTGGAGCAGATAGCAAGAACCATCATTTCATCCGACATACGTATTTTT
GATTTTCCAATGGATTTACATCTTTCATTAATGGAAA--TTTTTTGATGTAGTGAGTAATAGCTCTAAGAATTCTTGGCT
CAATGGATACAAATTTAGGCAGTTCATACCATCCATACATAGTGTTTTGATCTAAGATTTCAATTCTTCCATGTTTCAGC
AGTAACAT-----ATTCCTCCATGTCCAAAATATGGAAGAAAGAGGTCTTTCCACGACTTTACCA------CCCAATCAA
TTCTGTTCCACTTAATCC-CTATTTCATGGCCACATATCTTTCATGCTAAGGAATGGGAAACCTTTC-TCCTATT----A
CATGAATCCAATTTCATCCGGGAAAAGCCATCTTTTTCTCAACAATGCCGTTGTCATTTGATCCAATAGCGTTCCGTTAG
ATAGGAACAGATTTGATAAATACTGATAACTCTCGGATAGAGTATTAGAACGGAAAAATCCATTAGATAATGAACTATTG
GTTCTAAGCCATTTCTGGCGATGAATCAACAATTCGAAGTGCTTTTCTTGCGTATTCTTGATAAACCAGCGTTTATATAT
AGATGTAGTAGGATTGGTTTGGGAAGTAAGAAGCCCCTTTGACATCTCTTCATCTGCAAAGAATTCTCGATGTGAAAACA
CAGAGACAAAGGGCGGATCTTTGAATAGGAAAAAGAGTGGATCCGCAGGGTCCCAAATGAATTGGCTTATTCGAAAAAAG
CCTTGTTCTTTGGAAGATCTATCTCCTATCTGGTACTGCATGGTTCCACTCTGCAAGAACTCCGAATCATTCTCTTGAAG
CTCATCCTCTTCATCATAAATGATCCGCTTGTCCCGAAATGACCTGGCCCAATAGGGAAATCCCAATTCATTGGGCCTTT
CGATACAATCAAATAGAAAGCCCCAGGGGCGCCATATTCTAGGAGCCCAAACTA-------TGTGATTGAATAAAACCTC
CTCTATC-------TGTTGTG------GATCGAGGACTCCTTCTCCTTCCCCTTCTTCAAACTCCGATTCG------TAT
TTTTCATAGAGAAAT------CTCTGATCAAGGATAGAACAAGATCC------ATTTTGCATCATATCTAAGGGATTCCT
TGGTTCGAGCCGAAGAAGCAATGTCACTCGATCATTATCAAACCGACTGCAATCTTTTTCTGTCCGTGAGGATCCCACCA
GAGCGCCTTCTACTTCTAATAGGCCGTGAACTAGATCAGAATCATTTTCAACAAGTCCATAATAAGTGATCCCGTTTTTT
TCATCGGGTCCGGGTAGAGACCAAAGGTCTTGAGCAACCGATCCGGCAGAACAACTCAAAAGATAAAGAAGTATCGTCAA
TTTCTTCAGGCTCGTTCCAAGTTCGAAGTACCATTTGTACAAATAAGAATCCCCTTCATTACATGATTTCTTCTTCATAT
AGATAGATATAGGATCTATGGGGCAATTACTTAGAAATACATTTTGTGCAACAGCCCTTCCTATCTGATAGAAAAGGATC
CCATGATCCTGAACCGATCTTACCTGGGATCGCAAATCCCAAGTTTGTCTATGAAGAGCAGATCTAATTAGATTAGTGTC
TATAATTGATTTCTTCTGTGTAATACTAATTGATAGGGCCTCATTGGTAAGTGCTACAAGATCTCGTACATTGGAACCCA
TGGTTATGGACCCGAATCCATTAGTATGGAACATTTTTTTTTCCAAGTGAAATCCCCTAGTATATGAAAGAGTGAAAAAG
TGCTTTCGTTGTTGTGGAATAAGAAGCCTTCGTATCTTAATGCATGTATTTAATTTATTCGGAGCTATTAGAGCGGGATC
CACTTTTTGGGGAATATGAGTCGAAGCAATAACAAGAATATCTCTAGTGG-AACATCTTTCACAATCCCTGGAGAGATAG
TTCACTAATAGACCACGGGATAAGTAATTCGACTCATTCACATCCAGATCATGAATGTTTGGAATCCATATTATGCAAGG
AGACATTGCTTTTGCTAATTCGAATTGAAGGGTGATAT------AAAATCGGTCTATTTCCGGCATCATATCCATAGTTA
GCGCATTCATCCTAGTTAGAAGCTCCAGCTCCGTATCAAGGTCACGGTCGAGATCGTCACTCACATCAATATCGTCACTA
TCATCAATAAGAAAACCCTTAGGCT-TGTTATCCAGGAACTTGTTAAGAAATACTGTAATGAAAGGAACATAGGAGTTTG
TCGCTAGGTATTTGACCAAATAGGATCGTCCAGTTCCTATAGAACCTATCACTAAAATACCCCTAGAGGGGGGTAGGGCT
AAGCGGAGCGAAAAGGGTTTTCCATGAGATGGGAAATGAAAACTATTCGCCCCACACGAGGTTTGTGAATAAGTGATTGT
CTGATAATGAGCAAGGAATATCCGTCTTTCGGCTAAACAGGGTGTATTGAACTCATAATTCATTAGATACTTTTTATGAA
TGTCAACTAAGTATCGTAAGTAAATTGCTCCCGGCTCTTCAATCATTTGATAACCAGAGTCATTCTTTGATAAATGATCA
CTATGAGTCAGACTCAATAGAATTTGATCAATCC-TTTTTTCTGTCGTTAAGGTGGAGAACTGAACCAAGAATTCTCTTT
CTTTATCATCAATTGAATCACTGTTCGCGACCAAGGATTCTATTTTATCATCAATCCAATCACCGTTCACGTTTTTTCTT
TTTCTTATCAATGAATAAATCTCTTTACTTCTATGACTTAGATGTCTCGTATTTCTCGAAAAAGTGATTCGATTGATGGG
AT-TTGGTATGATACTTATGAGATTGATGAGATTGATATTCAAAAATTTCTTCTTAGAACGTATTGATTTGACCCCATAA
GCGGGACCACCACCCCATAGCATGTTGACGCCAGAAGCAGAACCCCGTATTTCTTCTAGAAAATCTCCTAATTGTTCCAG
AGCAACTAGAAAGAGATTCTTTAACCAGAAAGAATTCAGTTCAGATGTAGGATACCTATCCAGAAGTTTTCGCAACTCAA
TCATGTATGCTGGAATCATCAAAGATTTGACCTTTTTGAACTCTGTCTGTAACTCACTAGAGGCTCGGGAAA--------
-CAAAGAGAAGATGTGTACGAACGAGATATCCAGCAACAAGAAGAAGGAAAAGGATTGAATAGAGGAACTCCC-------
---GAACGTTTGGCGATCTCAGATGTGTCGATATCAATGGTGACTCATTATTTCGATGAATCATTTCTTCGGACAGAAGA
AGATTATGTAAACACTTACTGGAAATCTCGCTTATCAGATTCCATTGTGTCTTCCACAATTTTTTTTGAAGAATTCGCCA
TGATCTATCTAATCCATGCATAATATCATGAAAAATGGATACAAATTTTTGACTGCTACTTAGTATCGGTAATAGGTCTG
AAAAGGTATCTAAAAATATCACATTTAGATATTTGTACCCTGTCGAAGTAAGGAACCATGGCA---------TATATGTT
TGGAATAGATTCCATTTTGAGCGAGTTGAAAAAGCACTATCTCGTTGAAAAGTTCTATACATCTGCCCTTTTTCAACGCA
TTTCTTTAGACAAAGACT--CCGTTTTTTCCTCTTTTCGGATGGTAAATCTT---------TCTCAGAACATGGAGTGTG
AATCAAACCCATGTTTGAATTGAAATTGAGATACTGATGCAAGTTCTTCCCTTCTGAATCAGATAGATTCATATCCGAAA
GAGGTTGACAATAAGTTCTTTCAAAATTGACTATTTGTCCCTCTGTTAAAGGTGTTCCAGAAATGTCTGCGATCGAATAA
ATAGCTCTACGAACGAATGGATCGGATCCAATTGGAAAATGGAAAGATTTGTACAAGTTATACCTTTCGTCACCACTTCG
TGGAAAATCATTAGGTATGAATATGTTAGATACCTGTGACTCGATTGGTGAAATAGTATCTCTCTCCAAAAA------AG
CATG-TTTTTTTTTACCGCCGCACAAAGACAAAGCGAATATTTTGTTGCGAATGAAC-AAGATATTGAGGAATTGTC-CA
TACGTAAAATCATAATTCT--TGATACGGGCCTTTTCCACATAAAAAGGGAATCTTTTGTTACAATAGAAGCAGAAGTGA
TGTAGATTATTCAAGAATCGAAGTCGATTTGCTTTATAAAAAGAAGATATCAATGAACTTCTATGAAATGGTTTTACGGG
ATTCAGCCAATGGTCTTGATCGTGGGATATCA---------TTGAGAAATAGGAATCCGTGTT-----------------
--------ATCAAAAGATTTCCTGCGATTATT--TCTAGTATGGAATGAGTCAATCATCCACTTTGGTATCTTATTGAAC
AAAAATGGTGATATTGTTCCTCCATTG---------ATCAAAAAT-------------TTCGAT-TTTTGGGAAGTATCA
-----------TGATCATCCAATAAGAA------------------------------------GGGTTTC---------
----------AATTTTTTCAAATGAAC-----------GAT----TTGAAGACCTATTGG--TT--------------C-
-------TAACAGCTGATTACGGA--------------------------------AATTTTGGACCCTAGG---CCTAT
AGTGGGCCAGGA----GGTCCTTAGGTGAAC----ATCAATGGTTTCGAGGTCATACTCCAATCTATTGGATCTTGCATC
TGGTGATATTCCAACATTTAGTAAGGAAAGGAAGAGGTTGCCTCGAGTTGCAACTGTTACCGGGGTTTTGTCTGAGCTCG
ATGATGAGTCCAGCAATAGTGTTGGCTCGTGTTCTCCTTCATCTGTGTCTCAAGAAAGGATTATCATTGTGGGCAACCAA
CTTCCCCTTCGGTCCCAAAGAAGTCCAGATGGTGGTGGAGAGTGGTCTTTTTCCTGGGA--TGAGGACTCACTTCTTCTA
CAACTAAAAGATGGCCTTGAAGACGATGTTGAAGTCATATACGTTGGTTGCCTCAAAGAAGAGATCGATCCTGATGAGCA
AGATGACATAGCCCGGATGTTGCTCGAGACTTTCAAGTGTGTTCCTGCATTTATCCCACCTGACCTCTTCACTAGGTTCT
ATCATGGCTTCTGCAAGCAGCAACTCTGGCCTTTATTCCATTACATGCTTCCTCTGTCACCCGATCTTGGTGGCCGCTTT
GACAGGTCCTTCTGGCAGGCTTATGTTTCTGTGAACAAGATATTTGCGGACAAAGTAATGGAAGTTATCAGTCCAGATGA
TGATTATGTG----------------------TGGGTTCATGACTACCATCTCATGGTTTTGCCAACTTTC---------
-------------TTGAGGAAAAG-------G-------------------------TTCAA----TAGGG-----TGAA
---------------A--------------------CTTGGGTT---CTTTCTCCACAGTCCATTTCCCTCTTCTG----
--------------AGATATACCGAACTCTTCCAG-TAAGAGACG-AGC-------------------------------
---------TTCT-------------GAGA-------GCACTTC------------------TCAAC-------------
---------------TCTGACC-------------------------TTATTGG------CTTTCACACATTTGATTATG
CC-------------------------------------------------AGGCATTTCCTCT------------CTTG
T----------------------------TGCAGTC--------------------------------------------
---------------------------G-AATGCT----------------CGGTATTT---------------CTTATC
AA-----------------------------TCCAAG--CGAGGCTACATTG--------------------------GA
CTCGAATACTATGGTCGTACTGTTAGCA---------------------TT----------------------AAGATAC
--------------------------TCCCTG-TAA--------------------------AGTATACCA------AAA
AAAGCC-------------TATTTGATAATGTTACCAACGAAAGGTGTCAAAG---------------------------
-------------------------ATCCTCATTTTTCCA--------ACTC-G-------AACTTACAAATA-------
--AATACAGTAA-------GTCGTTTCT-------------AAACCCTTGTAACTT-ACTA-GTTGATTCAATTTTGGTT
GGGTTAGGTTGGAAC---TTTTTT--------------------------------------------------------
--------------------------------------------------------------------------------
--------------------------------------------------------------------------------
--------------------------------------------------------------------------------
---GT---------------------------------------------------------------------------
----------AATTTATTGAAATGCGC-TTTTTTGTTTCATCTTTAT---------------------------------
--------------------------GCTCGGCCCTGAATGATTCCAGTGAACATAC---TTTTTTTTGTTTT-------
-------------TCC--------------TAG-TTACAAAAAA--------CAAAGAATACAATACTGAA-------GA
ACT------------------GAAAACTATAAACTATACAA-----TTTTG-----TTTTTCAT-----TTTTTTTAGGG
CTATACGGACTCGAACCGTAGACCTTCTCGGTAAAACAGGTCAAACTTTTTATTATCAAAATGATTTGAACTGTTTCAAA
GACCCAACATGCATTTTTTGTTTTTTGCATTGAGCTCTTTCATTAACTG-ATATAAATAATTGGTTAGTCTACCATAGTT
CTCTTGACAGAAAGATAAGAAGATGGCTCCCTGTGCTCTGATTTTTTATGGATTCCGATCTGAGAGCACTACCAAAGTGT
TTCAAAG-AAGAATTATCCTGACGTAGGTCTGCTTTTGGCTTAGATYWRSCTWAGWTCAACCTAAGTTAAATGGA-----
------GTCTCCAT---CG--------------CC-----CAAAAG-AATCAAA-----------TA-------GGAAAC
TTTATACAC---------CTTAAAGTTCATAG-----GGATAGGACGAAAAGAGATTTTTT-TGAA------ATCCTTAT
ACTCA----ACCTAGCATTGAATAGACTGGATATTTACCTTATCAA-----TATCTTA-----AATCAATA-A------T
GGCCTCTTTTGAGTGCTG---AAAAAAGCACTTAAATTAAACCGAA-----TCTTTTGYGAATCTTTTGTCAGGCTATTG
TTCTCTAAAAGT--------CACGGAGT--------AAGACATCAACTTCTCAATAAGTCTT-------TTAATAATATG
AT----ATACTTCTTTG-----AAA-AAAAACATTGACGCGCGTGTAAACGAGGTGCTCTACCTAACTGAGCTATAGCCC
TTGTACCTTGTATTTGTGATACACATTTTATCATGTCGATAATTTCTTGTCAAGATAA----------------------
--------AGTTCATCTAGTTGTTTGGTG--TTGCTTATAAATAGTATTTGATTTATA----ATCGATTGAGGGAACGGA
CCCCC--CCCTTTATTTTTCTCTTTGTGATGATAAAAGACCTACTTAACTCAGTGGTTAGAGTATTGCTTTCATACGGCG
GGAGTCGTTGGTTCAAATCCAATAGTAGGTAGAACTTATTAGATACCAAAATCAATGGTATCTAATAAGTTTTGCTACCC
ATC-------TTTTTT-AT--------------TTGATTGATTTTTGA-----TCTTTTCCATTCCAGTCTATTTCATTT
T----------TGAATTGAAAAATTTTTCGTTGTATTAGAATCTGATTTCACTTATG-----ATTCTAGTCAATTGGCAG
---AAAAA-AAAATAGCTATATAAACGAAATTTCCGTTTATACAG-AAGTTATTTTGATTATTCGGACACAC--------
---CAACTAGTT-A---TAGTTACGAAACCTGATTGATAGCCTCTGCTCGTGCCTTAGCCCGTCTGAGAGCCAGATTGGC
CTCAATTATTTGTCTCTTTCCTTCAGCTTCCCTCAAGTTTGTTTCAGCTATTTCAAGAGTTTGCTGAGCTTC-TTGTGGA
TCAATGTCACTGCCGATTTCCGCATCATTTACTAAAACAGTAATCTCATTATTGCCTATTCTAGCAAAACCACCCATCAG
AGCCATCGTTAACCATTCGCCGTTAAGGCGTATTCTCAAAATACCGATATCGACAGCAGTGGCAATAGGCGCGTGATTTG
GTAATACGCCAATTTGTCCGCTATTAGTAGATAAAATGATTTCTTTAACTTCTGAATCCCAAACAATTCGATTCGGGGTC
AGTACACAAAGATTTAAGGTCATTTCTTCAAGTTGTTC-------TCCATTTCTAAATTCGTAGCCTTCGCAGTAGCTTC
ATCAATGTTACCTACCAAATAAAAGGCCTGTTCGGGAAGACTATCTAATTCTCCCGAAAGGATCAATTTAAATCCTCTAA
TTGTTTCCACTAGACCAACATATTTTCCCGGAGAACCGGTAAATACTTCTGCTACAAAAAAAGGTTGTGA-TAAGAAACG
TTCAATTTTTCGTGCTCTTGCTACAGTTAAGCGATCCTCTTCAGATAATTCGTCCA-ACCCCAGGATAGCTATAATGTCC
TGAAGTTCTTTGTAACGTTGTAAAGTTTGTTTAACTCTTTGCGCAGTTTCATAATGTTCCTCACCAACGATTTGAGGTTG
GAGCATAGTTGAGGTTGAATCTAAAGGATCCACTGCTGGATAGATACCCTTAGCAGCTAATCCTCTTGATAGTACAGTAG
TAGCATCTAAATGCGCAAATGTAGTGGCAGGAGCAGGGTCAGTCAAATCGTCCGCAGGTACATAAACTGCTTGAATAGAG
GTTATGGATCCCTCTTTGGTAGAAGTAATTCTTTCTTGTAAAGAACCCATTTCCGTA-CTAAGGGTAGGTTGATAACCAA
CAGCAGAAGGCATTCTACCTAATAAGGCGGATACTTCTGATCCCGCTTGGACGAAACGGAAGATATTGTCGATAAATAGA
AGCACGTCTTGTTCATTAACATCTCGGAAGTATTCCGCCATAGTTAGGGCAGTCAAACCAACTCTCATACGAGCTCCCGG
CGGTTCATTCATCTGACCATAGACCAGAGCCACTTTTGATTCTGGAATATTTTCTTCATTTATTACTCCAGATTCTTTCA
TTTCCATGTAAAGATCATTTCCTTCACGAGTACGTTCTCCTACTCCGCCAAATACAGATACACCCCCGTGAGCTTTCGCA
ATGTTGTTGATTAATTCCATAATTAGTACTGTTTTCCCCACCCCGGCCCCCCCGAATAGTCCGATTTTTCCTCCACGGCG
ATAAGGGGCTAAAAGATCTACTACTTTAATTCCGGTTTCAAAAATAGATAATTTTGTATCTAACTGTATAAA---GGCAG
GCGCAGATCTATGAATAGGGGATGTTGTG-CGAGTATCTACAGGACCTAAATCATCAACAGGTTCTCCAAGCACATTGAA
AATTCGTCCTAGAGTAGCCCCACCGACTGGAACACTTAGAGGAGCTCCTGTGTCAATCACTTCTATTCCTCTCATTAAAC
CATCTGTAGCACTCATAGCAACAGCGCGAACTCGATTATTTCCTAATAATTGCTGGACTTCACAAGTCACATTAAGTTGT
TGACCGGCAGTATCTCGACCCTTAACTACCAGTGCGTTGTAAATATTAGGCATCTTGCCCGG-GGGAAAAATTACATCTA
GCACCGGGCCAATGATTTGAGCGATACGTCCCGGGTTCTTTTTTT-CAAGCGTGGAAACTCCAGGGCTAGAAGTAGTAGG
ATTGATTCTCATAATAATATAAAAACGTGTCGAAAT-TG-TTCTT------TTTTTTTTCGAAGATTTTCCAGTCC-AAA
AGAAATGTTCGATAGCAAGTTGATCAATTAATTT------AA--------------------TTAAGAAGTGGGGGTTAG
CACTTGATTTCGTTGCTACCATCCAACGAATCCAATTCAATTGCTTACTTA---------TTTTTCA----------TTT
CAATGAGGGA--ATTTTCGA---------------GTTCAACTAACT--------------CATTT--------------
----TAAAAACAAAATAGAGAT--------ATTAAGTGTATGAGTACAAAGGGCTKATATTAAGTGTATGAGT-----AC
--------------AAAGGGCTTCGGGAAG------CCTTT---------------------ATAAACAAAACTA-TCT-
--------AT-TTATGGAATTCGAACCAGAAC-----TTGATTTAT-GATTCATAATTTCTATCTTATGGCTCTTTTTTT
TTTTCTTATTTAAACAGATTTAGTTACGCCTAGTT-AGTA-----------TTTTTTTTCTTAGACGAATTCCGCAGATT
TT--CACATT-TACACC-CTTTCACATTTAGGATTTACATATACAACATATATCACTGTCAAGAGGACA----TTTT--T
TTATTATTTAGACATTTTGATTAAAA-AAAGTTAAGAATTTAGAAACTTG-AAAAACAA-----GGGTTGCGCCATACAT
ATGAAAGAGTTTAAAATAATGATGTATTTGGTGAATCAAATACCATGATCTAATA-------TCTAAT------AACGAA
ATTATGATTAGTTGATA-----A-TA-TTGATTAATAACTTTGTGAACGATTCCTGTG-AAAG------G-----GTTCA
TTCACTCCTACTTCATGTCGAGTAGACCTTGTTGCTGTGAGAATTTTTAATTCATGAGTTGTAGGGAGGGACATATGTCA
CCACAAACAGAGACTAAAGCAAGTGTTGGATTCAAGGCTGGTGTTAAAGATTATAAATTGACTTATTATACTCCTGAATA
TGAAGTCAAAGATACTGATATCTTGGCAGCATTTCGAGTAACTCCTCAACCTGGAGTTCCGCCCGAAGAAGCAGGCGCTG
CGGTAGCTGCTGAATCTTCTACTGGTACATGGACCACAGTGTGGACCGATGGGCTTACTAGTCTTGATCGTTATAAAGGA
CGATGCTACGACATCGAGCCTGTTGCTGGAGAAGAAAATCAATTTATTGCTTATGTAGCTTACCCTTTAGACCTTTTTGA
AGAAGGTTCTGTTACTAATATGTTTACTTCCATTGTGGGTAATGTATTTGGGTTCAAAGCCCTACGCGCTCTACGTCTGG
AGGATTTGCGAATTCCTCCTTCTTATACTAAAACCTTCCAGGGACCACCCCATGGTATCCAAGTTGAGAGAGATAAATTG
AACAAGTATGGTCGT-CCCCTATTAGGCTGTACTATTAAACCAAAATTGGGATTATCCGCTAAAAATTACGGTAGAGCTG
TTTATGAATGTCTTCGTGGTGGACTTGATTTTACCAAAGATGATGAGAATGTGAACTCCCAACCGTTTATGCGTTGGAGA
GACCGTTTCCTATTTTGTGCCGAAGCAATTTATAAAGCACAGGCGGAAACGGGTGAAATCAAAGGACATTATTTGAATGC
TACTGCGGGTACATGCGAAGAAATGAACAAAAGGGCTGTATTTGCCAGAGAGTTGGGAGTTCCTATCGTAATGCATGATT
ACTTAACAGGAGGATTCACTGCAAATACTAGCTTGGCTCATTATTGCCGAGATAATGGTTTACTTCTTCACATCCATCGC
GCAATGCATGCAGTTATTGATAGACAGAAGAATCATGGTATACACTTTCGTGTACTAGCTAAGGCCTTACGTCTGTCTGG
TGGAGATCACATTCACTCTGGTACCGTAGTAGGTAAACTTGAAGGGGAAAGAGAGATCACTTTGGGCTTTGTTGATTTAC
TGCGCGATGATTTTATTGAAAAAGACCGAAGTCGCGGTATTTATTTCACTCAAGATTGGGTCTCTCTACCAGGTGTTATA
CCCGTAGCTTCAGGGGGTATTCACGTTTGGCATATGCCTGCTCTGACCGAGATCTTTGGAGATGATTCCGTACTACAATT
TGGTGGAGGAACTT-TAGGGCACCCTTGGGGAAATGCACCCGGTGCCGTAGCTAATCGAGTAGCTTTAGAAGCATGTGTA
CAAGCTCGTAATGAGGGACGTGATCTTGCTCGTGAAGGTAATGAAGTTATACGCGAGGCGAGCAAATGGAGTCCTGAACT
AGCTGCTGCTTGTGAAGTATGGAAGGAG-----------ATTAAATTTGA------------------------------
----------------------------------------------ATAATCCGC--------------TAA--------
---TTGACGGT-TTTTC-----------TT------NTAATT---------GAAT---------------TATAAT----
-------TAAAC-----------TCGGCCCAATCTTTTACT----AAAAGGATTGAGCCGAAT-------ATAAAGATCC
TAATAA--------------------------TAATAAAAGG--------------------TCCTATTATATA------
----------------------------TATTATG---TATATTTTTGATATAT-----------TCGATATACAA----
--------------------------------------------------------------------------------
--------------------------------------------------------------------------------
--------------------------------------------------------------------------------
--------------------------------------------------------------------------------
-------------------------------------------AA-----------------------------------
--------------------------------------------------------------------------------
--------------------------------------------------------------------------------
--------------------------------------------------------------------------------
--------------------------------------------------------------------------------
--------------------------------------------------------------------------------
--------------------------------------------------------------------------------
--------------------------------------------------------------------------------
-----TA---CTGGAAACAGAGGGG-----------------GTTCCACTATAATCTTCTT---TTTTCCACCCCTA-A-
----------ATTTATT-CAATACCCAGTTAATAATCCTAGTGTTTGGATCTATATGCTTATTC----------------
---------TAAAAGGA-------------ACTATTC-AAATGG-----TTTTTTTCATCGAATGACTATTCATC-----
--------TA---TTTATTTTGATATAA-ATAACA-GCAAGAAAGCTCTATGGAAAAATGGTGGTTCAATTCGATCCT-A
TCCAACAGGAAGATAGAAAACAGCTGTAGGCTAAAAAAATCAATGGATAATATCGGTCCTCTTGAAAATACT---AATAT
AAGTGAGGACC-T-----------------TCT------TATAA------------------ATAAGACAGATAAAAACA
CCMAKACAGATAAAAACACCCATAATTGGAGTAATA--GTGAGAGTTCTAGTTATTGTAATGTTGATCCTTTAGTCGGCG
TTAGGGACA-TTCGGAATTTCAGTGCAGATGACACTTTTTTTGTTAGGGATAGTAATAAGAACAGTTATTCCATATATAT
TGAAAATCAAATTTTTCAGATGAACAATGATCATTCTGTTCTGAGTGAACGAGAAAGTTCGTTTTCTTTTTATAGTTATT
GGAATT-CTAGTTATCTGAATAATGGGTCTAGGGGTGATGATGGCCATTAT------GATCATTATATG------TATGA
TACTAAATATAG--TTGGAAAAATTACATCAATAGTTGCATTGACTGTTATCTTGATTCTCAAATCTGTATTGATGGTTC
TTTTTTAAGTGCTAGTGACAATTACACCGAAAATTACATTTATAGTTCCATTTGTGGTGAACGTGGAAATAGGAGTGAAA
CCGAGAGTTCCGGTCTAAGAAGAAGAAGAAAAACGAATGCCATCGATTTAACTAAAAAA-GAAAGTTCTAATGATCTCGA
TGTCACTCAAAAATACAGATATTTGTGGATTCAATGCGAAATTTGTTATGCATTAAATTATA-----AAAAATTTTTTAA
GTCAAGAATGAATATTTGTGAACAATGTGGATATCATTTGAAAATGAGTAGTTCAGATAGAATTGAACTGTCGATTGATC
CAGGTACTTGGAATCCTATGGATGAAGACATGGTATCCCTGGATCCCATTGGATTTCATTCGGAGGAGGAACCTTATAAA
GATCGTATTGATTCTTATCAAAGAAAGACAGGATTAACCGAGGCTGTTCAAACAGGCACAGGTCAACTAAACAGAATTCC
CGTAGCAATTGGGGTTATGGATTTCCAGTTTATGGGGGGTAGTATGGGATCCGTAGTAGGCGAGAAAATTACTCGTTTGA
TCGAGTATGCTAGCAATCAATTTTTACCTCTTATTCTAGTTTGTGCTTCCGGAGGAGCTCGCATGCAAGAGGGAAGTTTG
AGTTTGATGCAAATGGCTAAAATTTCTTCCGCTTTATATGATTATCAATCGAATAAAAAGTTATTTTATGTATCAATCCT
TACATCTCCTACGACTGGTGGGGTGACAGCCAGTTTTGGTATGTTGGGAGATATCATTATTGCTGAACCCAATGCTTACA
TTGCCTTTGCGGGTAAAAGAGTAATTGAACAAACATTGAATAAGACAGTACCTGAAGGTTCTCAAGCGGCTGAATTTTTA
TTCCATAAAGGTTTATTTGATCCAATCGTACCACGTAATCCTTTAAAAGGCGTTCTGAATGAGTTATTTCAGCTCCATTC
TTTTTT-TCCTTTGAATCATA-------------AATAAAAATCATAAATAAAGTTAAAGTAGA-GC-------------
TTAGCTTAG------------TTA-ATTCTAACTAGG-----------TTTG-----------GTTTAATTATAAATTAG
TTAACTAATTT-AACTAT----TTGAGTTC-------------------GGCCGAAC---------------A------A
GTATTTATCGA------CGAAAA-----AA----------CTTGACGAGTGGGTTTTTTG---TTTTTGTGACCGA----
--------------AGAGTAAATTGTAGAAAGTATCA------TGTAGATC---TT-----TTTTTTTTTTT----TTAC
CGA--TATT----TCTG-------ATTACTAA---------TTACTAATTAGGCAACCTCTATT-------GCAAACCAA
G-AGAAAAGG-GTGAATTTTTTCT---TATACGAAA-------TTGAATTTACAAGG-------GAAATAATAAATAAAA
CGAATTTCATGTTCTTT-TCTTACGTCTGTTTAGAAA------------------ATATAGAGTCT--------------
-CTC----------------------------------------------------------------------------
--------------------------------------------------------------------------------
--------------------------------------------------------------------------------
--------------------------------------------------------------------------------
-------------------------------------------------------------------------------C
ATATTTTTTATATAAA-----A----------------------------ATGAAA--GAGTCTGTTTACCATTTAGTTA
GTTCTACACTCCTTGTACTTT------AT-GATA----------------------------------------------
-----TATACTCACTTAGA--------------TATACT-TTGTATAATTT------TATACA-AATAAAATTATATTAT
AATGATTATAAGATATCTTTCTAACAATAAAATATAGCAATAACAGGT--AAAAATAGTA-------------AT-AAAA
AATAGGTACAAATTTAAAATCGAGGTG-CCCGTTTTATGACAATTCTCAGCAACTTACCTTCTTTTTTTGTGCCTTTAGT
GGGCTTAGTATTTCCGGCAATTGCAATGGCTTCTTTATCTCTTCATGTTCAAAAAAACAAGATTTTGTAGATCTGATGGT
AGCAAATCTTATCTA--------------------------TTTTTTTT-TCAA-----TACTTAGACTTA---------
-----------------------------ATGGTATAACATGTGGCTTCCTTC----AAA------AAACATACATG---
----------------------AAAAAAAGGGGT--TCTTATGCAGGCGTA-----------------------------
--------------------------------------------------------------------------------
-------------------------------AATGGG---------TTATATGAGGAAATAGAAATAAGCTATTTGAA--
-----------------------------------------------------------------AAAAAAAAAATTGAG
ATTGGGTC-----TACTGTCTGAAATTGA---------AATAAAAACAAAGC--------------------TAATGTAT
C--TATGTGTATAAGTGTA-AATA-GGGGATTATATCAAGGGACTCCTC-------------------------------
------AAGATTTATATCAGAATAGTCCGAGTTGATAAAAGTTAC-TTTGGAAAC--AAACAAAGTAAAA------TTCA
------TTTGGGCTAGTCTCCC----------------------------------------------------------
--------------------------------------------------------------------------------
-ACTTTCAATAA------AATGCAACTGGATGTAGTATGAGTTGGCGATCAGAACGTATATGGATAGAACGTATAGCAGG
ATCTCGAAAAACAAGTAATTTTTTCTGGGCCTTTGTGCTTTTTTTAGGTTCCTTGGGTTTTTTATTGGTTGGGATTTCCA
GTTATCTTGGCAGAAACTTAATCTCTTTATTTTCGTATCAGCAAATAATTTTTTTCCCACAAGGGATGGTGATGTCTTTC
TA-TGGCATTGCCGGTCTATTTATTAGCTCTTATTTGTGGTGCACAATTTCATGGAATGTAGGTAGTGGCTATGATCGAT
TTGATAGAATAGAAGGAATAGTGTGTATTTTTCGGTGGGGATTTCCTGGAAAAAATCGTCGCATCTTACTCCGATTCCTT
ATGAAAGATATTCAATCTATCAGA-ATAGAAGTTAAAGAAGGTATTTACGCTCGGCGCGTTCTT------TATATGGAAA
TCAGAGGGCAGGGGGCCATTCCCTTGACTCGTACTGATGAAAATTTGACTCCACGAGCAATTGAGCAAAAAGCGGCGGAA
TTGGCC---------------------------------------------------------------TATTTCTTGCG
TGTAC--CAATTGAAGTATTTTGATTAGATAC----AAAT-AGATCATATCTTGTAAATTCTCCCC-CCCCCCTTT----
TTTTT----GTCA------ATCAACGTTTCTTTGTTTCTTTTTATCTGTGCTCC----------TTAATCAGCCTT----
------GAA------------TTCTAACCTT--TCTGTTTTATTTGG-TTTTTGCCGTTC----A-----TTTTTGATCA
TC---ACAATATTCTTTCAGAAATCTATCTCACTTATTCCTG-----TAGAATACGGGCAGTTGA---------------
----------------------------TCTATA--T--TTTTTTTTTTCGGAAAATTTGCTATTTTGATAAAAA-GAAA
TTCTTTCATCTCGAAATCGGGATTGGAAGCGGCCCTTTCGGGCATTCGTCGAA----AAGAGGGAATTGCTTC--AAATT
TGAGCAAT----------------------------------------TGGGATATCTGGAAAGAAAAGGAATATTTTGT
TTCTTCATTCGTCTTTCTAAGGACTAGTTTCATAGGGTCGAAG----------GGTCCGAAGCCTTGTAATAAACT----
TATK-YYWTTCGTCTTTCT--------------AA-GGACTAGTTT------CATAGG-GTCGAA-GGGTCCGAAGCCTT
GTA-ATA-AACTTATGCTTGATAGAAATATTCGATCATATAGAGTCGACGAACGGTATCGGTTCATTAA----AAATTCA
TCGACACAAAAATG---A-AAAAAAAAACATTTATTCCCTTTCTACATCTTACATCTATAATCTTTTTGCCCTGGTGTAT
CGCTTTTTCATTTAATAAAAGTTTGGAATCTTGGGTTATTAATTGGTGGAATACTAATAAATACGAAACTTTTTT-AAAT
GATATTCAAGAAAATGATATTCTAAAAAAATTTATCGAATTAGAGGAACTTTTACTGTTAAACGAAATGATAAAAGAGCA
CCCTGAAACGCATCTACAAAAGTTT---------CCTATTGCAGTTCACAAAGAAACGATCCAATTGATCAAGATGCACA
ATGAGCAGCATATCCATACAATTTTGCACTTCTCGACAAATATAATCTGTTTCGTTATTCTAAGTGTTTATTCTATTCTA
GGTAATGAAAAACTTATTATTTTTAATTCTTGGGTTCAAGAATTCCTATATAACTTAAGTGACACAATAAAAGCTTTTTC
TATTCTTTTATTAACCGATTTATGTATAGGATTCCATTCACCCCATGGTTGGGAATTAATGATTGGCTCTGTCTACAAAG
ATTTTGGATTTGCTCATAATGATCAAATTAT-ATCTGGTCTTGTTTCTACTTTTCCAGTCATTATTGATACAATTTTGAA
ATATTTGATTTTCCGTTATTTAAATCGTGTATCTCCGTCACTAGTAGTGATTTATCAT-TCAATGAATGACTG-AAAAAA
GTTTTACCAATCAAATTAGAATGTTTGGTATTTTGTACATAAACA---------AAACAGTTAAAATCTGAC--------
----------------------TTAT----------AGT------TTTGAAAAAATTT-----------TTCAGTAAATA
-----------------------------------------------------GCAGC-------ATCATTGAAAAAATT
TTTCAGTAAATAGCAGCATCATGGATAGGGAACTATACTAGTAACCTACCTAATTTTATTGTAGAAATTTTCGAGCTCAA
CC-TTGGA-CATGCAAACTAAAAGGACCCTTTCTTGTTGGATAAAGGAAGAGATCATTCGCTCCATTTCCGTATCGCTCA
TGATATATATAATCACTCAGGCATCCATTTCAAAAGCATATCCCATTTTTGCACAGCAGGGTTATGAAAATCCACGTGAA
GCAACAGGCCGTATTGTATGCGCCAATTGTCATTTAGCTAATAAGCCCGTGGATATTGAGGTTCCACAAGCGGTACTTCC
TGATACTGTATTTGAAGCAGTTGTTCAAATTCCTTATGATATGCAACTGAAACAAGTTCTTGCTAATGGCAAAAAAGGAA
CTTTAAATGTAGGAGCTGTCCTTATTTTACCCGAGGGATTTGAATTAGCCCCTCCCGATCGTATTTCGCCAGAGATGAAA
GAAAAGATAGGTAATCTGTCTTTTCAGACTTATCGCCCTACTAAAAAAAATATTCTTGTGATAGGTCCTATTCCTGGTCA
GAAATATAGCGAAATCACCTTTCCTATTCTTTCTCCGAACCCTGCTACTAAGAAGGATATTCATTTCTTAAAATATCCCA
TATACGTAGGGGGGAACAGGGGAAGGGGTCAGATTTATCCCGACGGGAGCAAGAGTAACAATACGGTTTATAATACTACA
GCAGCTGGTATAGTAAGCAAAATTCTACGAAAAGAAAAAGGGGGGTATGAAATAACTATAACAGATCCGTCAGAGGGACG
TCAAGTGATTGATATTATACCTCCAGGACCAGAACTTCTTGTTTCAGAAGGCGAATACATAAAACTTGATCAACCATTAA
CAAGTAATCCTAATGTGGGTGGATTTGGTCAAGACGATGCGGAAATAGTACTTCAAGATCCCTTTCGTGTTCAAGGCCTT
TTGTTTTTCTTGGCATCTGTTATTTTAGCACAAATCTTTTTAGTTCTTAAAAAGAAACAGTTTGAGAAGGTTCAATTGTC
CGAAATGAATTTCTAGATCTACGGATTTATCATCAGCAAGTTCTTAAAAAGAACACA----ATTTTTGGTAACAATTATG
TATAATCAAAATGTGACAAGTA-----TTTTATT---TTTGTTTCTA-----TTTTTT-------TTTCCCAG-----AT
TTTGGGAAGTACTTGTATCGCATTTC------TATACATAGTATGTATGTTGGT------AACAAGACTCTTTTACTTT-
---------------------------------------------------------------------TGTCAGATGTC
GTAGAATGTATCACTCTTCTATTCGCATAGAATCAAATT-TGACTAAATACTAA-TTCCTAGTCTTCGGCACAAGAAAA-
--------------------------------------------------------------------------------
--------------------------------------------------------------------------------
--------------------------------------------------------------------------------
--------------------------CAAAGAAAAAATAAAAGGAAAATTTTTAAG-------------------CAAAT
AGAACTTCCTCACTGAACTTCTAA------------------------AAAAAAAATTACACTTTGA-------------
-------TGA--GA------------------------------------------------TACT--AAAAAAAAAT--
AGAGTAAGGCTCTATT---------AGTAT-----------------------------------------------ACC
AAGAT-TGGCACGC----------------------------------TAATT-------AA-ATAGTATGA-------T
TATGCCATCCAAGAGA-AGGGGGTCTA-----TACTTCCTTC------------------------TTATTACTTT--GA
AAGTAGTGATAGATACTAT-----------------CGAGGAACAACTGTTTGGAGTCAATTAATGAAGTTATTTTT-CA
AAAGCACCATCTAG------AAAAAAATTGGAATGGAA-TTTTT-----TGAAGTATTTGAAATATGAGAGAGCTCAACG
GGACCTATACCCC--TTTTTCTCTCTTTTTTT-----G-----ATTTGAGGGGATTCGTTGAGCTCTTACACTTTAATGT
CTACACCACAGTTTATCCTATTATTACAGGGACGAACCCAATCCGGAATATGAACCATAAAAGAAAATGCCTATTAAACC
AATCACAGGAATACCAGTTACAGTACCTATTATCCAAAGAGGAATCCTTCCAGTAGTATCGGCCATT--------TTTCC
TYCW-----YATTTATTAATCAAGCGGTCATGCTAGAGACCTAAACAGTCATAGATAATTATGAGATGATATCCTTCCG-
-------ATGGGGTAAGAGAATTCCTACTCT-ATATTTATTATTCTACTA----TTTTTTGTATCTTCGATTAATTGAAG
AAATAATTAGAAAATAAAACAGCAAGTACAAAAATGAGTAATAACCCCCAGTAGAGACTGGTACGATTCAATTCAACATT
TTGTTCATTCGGGTTTGATTGTGTCATGGCTCTATAATTAATTCGAATTAGGTTTATCGTTGGATGAACTGCATTGCTGA
TATTGACCCCAAAAAAGAAACGGTAGGTACAGCTAATCCGTGAACAGCCAACCATCGTACTGTAAAAATTGGATAGGTTC
GATCTATGGTCATTGGGGCCTCCTAAAAAGATCTACTAAATTCATCAAGTTGTTCCAAAGGATCAAAACGGCCGGTTATT
AAAGGAATTCCTTGTCGGCTTTCTGTAAAATATTCATTTGGGCGAGGGCTTCCAAAAACATCGTAAGCTAAACCCGTGCT
TACGAATAACCAACCTGCAATGAATAGGGAAGGTATAGTAATGCTATGAATGACCCAATATCGAATACTGGTAATAATAT
CAGCAAACGAACGTTCTCCTGTGCTTCCAGACATGCCGAGCTCCATATATTCTTGTACAGTCA---AAGGGGGATCCTTT
TTGTAAACGATGAGATCAGTAAATG-AAAATTTACTGGGATTCCTTCCT-------TGTGAGATTGTCAATACAATATTG
TACCGAGGGTTTTGTTAAAGTATACCGAATCAGTATAGCTATCCTTCTTCTGACGCAGCAATGCAACTTTAATTAGTATC
GAAAGGAAATCTTAAATAATTT-TTTTCTTCTTTTCTTTTTCTTGT-------TGCT-----------------------
----------------------------TGGGTTGCTTTCTAATCTAAAAAGAATTTAGAAATTGGAAGA----------
--------------------------------------------------------------------------------
-----------------------------------------------------------TAA------------------
-------GGCCTTCTTGACATTTAACTACA--------------AAC---------------AGGAATT-----------
--T-----TTAATATTCATTTTATATT---------------------TTATT------TCTCC------AGAATTGTCC
AAGGAATCTCTTA-----------ATTCGGAATCACGTGAGCATAGA---------------TGAATTTTTTAAATGATG
AA----------TGGA----TTTCTTTTCTAC--TC-A--TATCACTCTATTTTT-----GTTAGTGCCGTCTATAGTA-
--------TATA-ATATATA------------------ATAA------TAATGGATTGAGA--------------AATTC
A----AAACTTTCAATTGAACGTATTTATTTAATATTGGTATGTA--GTTTTGTTTAGTCTTGTATCTTTC----AAAAA
ATGG--------AATTTTCGGAAAGTACTTTACAACCATATGAT--AT------AT-ATATAAGTTTATTTAGTTCTTTC
ATGCCTACTATAACTAGTTATTTCGGTTTTCTACTAGTGGTTTTAACTATAACCTCAGTTTTGTTTATTGGTCTGAGTAG
GATACGACTTATTTGATTGAAATAAATTGAATGAACAATTCAT-AAAAAGAGA--TTTTTCTGCAAAATTMSYK------
--CTT-----TACC--------ATGTCAAT-----TTCCAATTCTTCGTTATTGAGATTTATGGACAATATGAATTAATA
TTTAAGGATAGATATTACCTC---TTTTTTCTCTTT------AAACAAAAATTGAAATGATTGAAGTTTTTCTATTTGGA
ATCGTCTTAGGTCTAATTCCTATTACTTTGGCTGGATTATTCGTAACTGCATATTTACAATACAGACGGGGTGATCAGTT
GAATTTTTGATTAATT-----AATATCGTGCGTGCC--TTTTTTGACCTCCT------TTTWWYTYKMAA--GAG----G
TCAAAATTAGAGTAGATTGTTGTTCCAA--TTTTCTGTATAATGTTGACC-----TAATAAAA---------CGGATTCA
CGCTCTGTAGGATTTGA----------ACCTACGACATTAGGTTTTGGAGACCTACGTTCTACCGAACTGAACTAAGAGC
GC----TTTT-------TTTATAACAAAGAATATAAGACTGTAAGGAAAAAAATTC----T---------TTTTTAACTT
CAATACATCWTTGGAG---------ACCTAC---GTTCT------ACCG---AACTG--------AACTAAGAG------
--------CGCTT-TTTTTA-TAACAAAGAATATAAGACT----GTAAGGAAAAAAA---------TTCT----TTTTTA
ACTTCAA----------TACATCA----TTTTTGCTTAGAGACAAAGTAATAGGTAGGGATGACAGGATTTGAACCCGTG
ACATTTTGTACCCAAAACAAACGCGCTACCAAGCTGCGCTACATCCCTTTCAATTGGTCTACAATGTCATTGTAGAGAAT
CCATATATTGTTTTCCACATACTTA-TTTCATTTTCTCTATCGATATACACAACTTTTCTTTCCATTTC-----------
-----------------------------WYAWAYA---TATG----AAAAAAAAAATATAT--ATATATAC----GAAA
CCCGCTTTTGTG------AATGTTTAGGCGGAAGCAAAC-TATTTTG-----TTTTTCTTAAG-------AAAAG-----
----------------------------GAAGATCTTATTTATCAAAT-CGTTGTAC----ATTTCTATTTGAATTAGGG
ATTCCTC-CCCCAG---------AGAAAACGAATACAAGTGG-------CC--TTT---------AACTA-CATAAACCT
TAGATC------ATATA---------TTATACAATAAACA------CTTTTTA--ACACTAAACA-------AAAGAAGG
AGGATT-----TTAAATGCGAGATCTCAAAACATATTTATCGGTAGCACCGGTAATAAGTACTATATGGTTCGGGTCTTT
AGCAGGTCTATTGATAGAGATCAATCGTTTTTTCCCAGATGCATTAACATTCCCCTTTT-TTTCATTCTAGTTATT----
-TACACGAGGGGATG----AAAAAAGATTAAAGATAGAATGAAAAATCTGTAATTA----------CTCCCC---TTGCT
TCT---------------------------------TTTTTTT---------------------AGG-------------
-----------AT----------------------------------------------AAGGAAAAAGAATAAGTGG--
----------------------------GTTCAAACTTAGTGA---------AACTG---------------GGAGCTTG
G---------------------------------------------TTTCTGTCTTCAAGTAAATTAACTTTAATCAAAT
TAGGAGCTTGGTTTCTGTCTTCAAGTAAATTAACTTTAATCAAATTAAGAGAACAG------AATTG-----AAAATGT-
-----GGTTAGCGCAACAGTATCATACAAGATGATTAAATACAAT-ACTGT-------------CTAGTAATTCTAATCT
AAACTTATAATCGACGTAG---AGTTTAAAATCATTGTATTACTTA----TTATTTATTACTA------TCTTG-T----
--TTGCAACAT-AAAATTTAGCGAAATT---TTATTTCGAGTTAACCACTTCTAT----ATTTTTCCTT-----------
-CC--TTTCTTCTTCC------TTTTGAAT--CAGA------AAAA---CGAGAG-----GAG-TTAGTTGGAT--AAAA
AATCCAA---AGGGGG--TTCATGGCCAAAGGTAAAGATGCCCGAGTAAGGGTTA--TTTTAGAATGTACCGGTTGTGTT
CGAA--ACAGTGTTAATAAGAAATCAACAGGCATTTCCAGATATATTACTCAAAAGAATCGACACAATACGCCTAGCCGA
TTGGAATTGAGAAAATTTTGTCCCTATTGTTACAAACATATGATTCACGGGGAAA------------TAAAAAAATAAGT
GGAA------------CCAATTACCTGCGTGTTACCTT------TGCAAAAA-AGATG----AAAAATAAATATTAACA-
--TATA-ATATGTTAATA-TTTA-TTTA-ATATATATATATTAATATAC------------------ATTAAT-------
-TAAAAAAAAAATCCTATTTCTT-------AATTCTAA------ATCATTATTGTTTT-TTGATCCAACCGAA----CGA
AATAGGATTTTC-G--------AAATAAGTAAA---ATAAACA---CATGGATAAATCTAAGCGGTTTTTTCTTAAGTCC
AAACGATCTTTTCGTAGGCGTTTGCCCCCGATCCAATCGGGGGAGCGAATTGATTATAGAAACATGAGTTTAATTAGTCG
ATTTATTAGTGAACAAGGAAAAATATTATCTAGACGGGTGAATAGATTAGCTT-TAAAACAACAACGATTAATTACTATT
GCTATAAAACAAGCTCGTATTTTATCTTCGTTACCTTTTCTTAGTAATGAAAAACTATTTG-AAAAAAGTGAGTTGGTCG
CTAAAATGACTGGGTTTAGAACCCG---AAGAAAATAGACTTACTCTTCA--ATTGAATCAAAATTACAATTCGAACTCA
AAGGTAGATTGAAGGTTTTGTTCGAAAAATTCGAAAACCCAGATTT-GATTGTCGTAAG-----AAAAGAAACGAATTTT
GGAAGAATA--TATC-----------TTTTTTTATT-------------------------------------------G
AATG--TTTTTAGTCAGTTTCACTACT--TGATCGTATATTTATTACTT-------------------------------
-----------------------------------------------------------------------------GAT
CATATYATACTAATTTCTATTCTATCCTCTCAGAATTCATTCTCTA--------------TTGAATTCCATGTAAATCAT
TCCGA--TGTATTCTTTCCAAC--CCCC----------CCTT---TTTA-----------TTTT-AAAATGTCATTGCAA
ATTATATAAAGACAATTCCTTTTTAATATAGCTATTTGCGCCAGTATTTTACGATTAAGAAGCAACTGTCTCTTGTATAG
ATTGTTTATTAATCTACTATAACTATAGGATGCCCCAGTCTCACGAATTACTGCATTTATACGAGTAATCCATAAATGAC
GAAAATCCCTTTTTTGCCT-ATCTCTACCCCGCTGGGACGAAAACAAAGCTCTTTTTTTTTGTTGAAAAATAGTTCGAGT
AAGTCTTGAATGAGCTCCGCGAAAGCTTGATACAAATAAACGAATTTTTGTTCTACGCCTTCGAGCTACATATCCCCGTC
TAATTCTGGTCATTGACTAAACGAAACTTTGATGAATAACT--------AATTTATTTCCTTTCTTTAAGTTATTCTTGT
CCCCTTTTCTATAATAACAAAACGGAATCCTCCAAT------GTATA-AAATAATAATTCCAAGGGCTTTTGCTACTATA
ACCTTCCCAACCACAA--TT--------TTTTTC----------------------------------------------
-----TAAGCAACAA------------TTCCT----------------------AGAAAAAAA-----------------
-----------TTCTA---------------TTGA--------T------------ACT--AA--GTATTAAATAAAAAC
ATACTAA----ATAAAATAGTA---------------AWAAATAAAAAC--------ATACTA-----------------
---AATA-AA-ATAGTAAATATAATAG-------------------AAAAATGAATAACTAAATCGTGGGTTCCTTCGTT
TCTATGGTTATTTATTAAACGGTGAGGTCTTCTCTATATA-CCG--------GAGCC----CCTC----CCTTCATTGAT
TTTTTTAWTTTTTT-----AATCAATCTTATTATTAACTTGTACAGTTCACACTCTTTGGCTCTACCCATGAATTCTCTA
GTAATAGGTCTTT----GACAACGAAATTTTTCTATACAGTAACGGT-----ATTTAATTCTG-AAGATTAGCTGCTTAG
CTGACCTTGTTAGTCCGTTCTTACAAG-AATG------------------------AATTT-AAAAAAGATTTTCTCTGC
TT-AAGATATAATCATTTATTA-----CCAATAGAGAATTCTTT--ATCATTTTAAATGAAAAAATAAGGTGATCAAAAT
TCCACCAATAGAAAACACATAAATTTAATACACAATAACAATAGAA-GGATATCGTAGATCTTTTT----T--TTT----
--TA--------------GATAGTA-AAGGG----GTTTTTCTATC-----CTACCCATCTGTGTACTGATCATGAATAG
TGG-AAAAATTGGTTTCCTTT-----CTTTTGTCCGAACCCAT-GATCTGAACGAGTCGCACATACACCCTAGTACATGT
TCCTCGCCGCTGAGGACATCTCCCAAGAGCAGGAGATTTGGTGACATTTCTGATTGGCTGTCTTGTGTTTCTAATAAGTT
GTTTAATAGTTGGCATATTGAATTGTATGCATAATGGGC------TGGTTTAG-----------ATCGATCCTAACCAGA
-----------A-----------GATTATGAATT---------TTTTTTCTAAAAATATTAAT-----------AGAAKA
TTAA-----------TA-----------GAAGATT-----------AGTAGAGTAT-----TAAACCCGAGTA-------
--------ATAAAA-TCTCAAATTGTTTGTGCAATTTGCACGAAATTTTTGTTAGTTTTTATGAAACTGCTACAAGATCA
ACAATTCCATGAGCTTGGGCTTCTGTTGCTGACATAAAAACATCCCTTTCCATGTCTTCGGATACGACCCATAGGGGTTT
GCCCGTTCTTTGTGCATAAACCCGTGTGAGGATTTCGCGCAGTTTCAGTAGTTCTTCTGCTTCCAGGACAAATTCTACTA
TTTGTGCCTCATAAAAACCAGCAATAGGTTGATGGATCATTACCCTGATG--ATATAAGATAAT---AAAAAAAGATTAT
TCTATCCCAAGTCATAAGACGACGAG-ACGAGATAAAGAATAATAAG--AAAAAAGATAGAATTGAAC-----AACCGTA
CAGGCATTGTTTGCGGATTGCATACGGC-TTTAGATTGGAATTTAC--TTTTACCTTTTATCGAAGAAAAATA-------
T-AGAGTCTACGAGGCCC-AGATTGG---------------CCGCCCTTCCCTTGGGAGTAGTT--AAAAAATWCTACGG
TGGTTCCGTTGCTTTATTTCATCG----TTTATAACTCA-----TA-ACATATAT----AGTG-----------------
--------------------TT------------------------AAGAGCCTCT-------CAATGTGAAAACAAAA-
----AGTGAAAG-------------------------------------C-AAAAA------GGTTTGTAACGCTGAAAA
AGAACTCCG----------------ATAGA--AAAGATAAAATATAGC------AAAATCGGAAATCCTCTTACTATCTC
ATACTACTCTTTCGATACAGAATTGAATAGTAAATTAC--AAAAAACCA----G-TAACCATTTTCTTATATCGAACTCA
AAATGCCATGCTATTATTACTTACTATTTATTCATATTTCATATGGCAAAGGCATAGTTTTCTTTGTT--CTTTCGAAT-
-----CAAAAACTCATTGGCGCCAAGCGTGCGGGAATGCTAGACGTTTAGTTATTTTTCCTCCGACCAGGATAAAAGATC
CCATTGAGGCGGCCAATCCCATACATACTGTTTGTACATCTGGTCGCACAAATTGCATAGTATCATAGATAGCTATTCCA
GGTATTACCCATCCGCCAGGAGAGTTTATAAACAAATACAAATCTTTAGTTTCACTCTCTATACTCA-GATAGACCATAA
GACCAATAAGTTGGTTTGAGATCTCGCTATCAACACCTTGACCTAAAAAAAGTAATCTCTCTCGATAAAGTCGATTGATT
AGGATAAAATTATCCCCCCTAGAAACCGTACATGCATCTTTTGCTGCATACGGTTCAACAAAAATCGTG---AAAAAAAA
ACAATCAATGTGTAGCTTCCAGTTCTC-CCTTTTTTGATAGTGAGTACTTTCTAACTTCTCT-------TCTAATGAAGA
GGTTGTTCTTCCAT---T---TTTTCTTTTT-------CAATAAAGAGAGGTTTTGACTCGTTTA---------------
----CCTATATGTTTACC-----------TA--TATAG-------AATTGATTAAATTAAACTTATCAA-----------
ACTAACTTCTTATTGATATATTCTTT-CATCGAGATCTAATTTTAATCATGATGGCATTTTCTTGTTTC-TGAATGGG--
-TTTCTTTAATTCTTCTTTAGGTTTGTGCTCTACTCCGTGTAAAGATCTCCCCGAATTTTG---ATTTG-CCCGTATAGG
GCAAATGTCC-CAAGACTCCGTC--------TTT--ACAAC-----CTT-TTTC--AATTCATAGGACGGTTTCCGCCAC
AAATTTTTGAC---GTATTTGGT-----ATATTATTCGATTAATTATGAATAGCGATTGTAAACTAC------TCCTATT
T-----------T------------AAACTACTTTAATT-------TC------------------A-TTT---------
--CTATTTAGAAATTCTATTTATAATAAAAAAAAAT-A---------------------A-GTAG---------------
------TAATGAT----------AGA-TATAGATATAGTAGTAATTGGTTTTTTATAAACGGAGCCTGGATACTTCA-TT
TTTTT-GGGCCAACCAAGCTAACCATAAATTATATTAATTTAGAATATTAATCTGGATACCCCCAAAGCATAAATGAACT
TCACGCTCCAAATTT------TTGATAATTTAATCAACCTTTCTTGGGTGAAACAGAGGATC-TCTCGATCGGGGGAGAG
AACGGGAAAATCCCGTATGACCCGATATATCTGACAAGTCGCACTATACGTCAATCCAAATTGAACCATCTTCCCCAGGA
TTTCGAAAGGGTACTTTTGGAACACCAATAGGCATTAAATAAAAGCAAAAA-CTAAGTACTATATTTCACTTTGAT--GT
GAAAGCGTAAGAATGAATTTATTGTTTTA-----AAAATATTG------------------GCCTTT-------------
--------------------------------ATCATATGTTATGCGTGGATTCGCTAAGTTTATA----AAAAGAAAG-
-----------------GAAACCAAAATAATACGAATAATAGGGAAGCCAAAATAAGAAAATTATTACTACCAGC-----
-------------------------------TCTGTATGCAGTTGTT---------------------------------
-----------CATAGAA-AATAGGGTGAATCCCCCATTGCGTATTGGTACTTATCGGGTATAGAATAGATCTGCTTCTC
CGT-----GTTTCTACAAACAAAATTGTTACATTGTT----ATTA-AAAGAATAG----AAAAAAAA----AATAAATCT
TTCTCGGAGATAATCCAACGA--A-AAAG--------GGGGT----CCATAACATAG-----TTTTTTTCCAGTGCAATA
AAGTTACATAGTGTCTATTTGTTATTGATA-----------------AA--GGGGTATTTCTATGGGTTTGCCTTGGTAT
CGTGTTCATACTGTCGTATTGAATGATCCCGGTCGTTTGCTGTCTGTCCATATAATGCATACAGCTTTGGTTGCTGGTTG
GGCCGGTTCGATGGCTCTATATGAATTAGCCGTTTTTG-ATCCCTCTGACCCTGTTCTTGATCCAATGTGGAGACAGGGT
ATGTTCGTTATACCCTTCATGACTCGTTTAGGAATAACCAATTCATGGGGTGGTTGGAGTATTACAGGAGGAACTATAAC
AAATCCGGGTATTTGGAGTTATGAAGGTGTGGCTGGGGCGCATATTGTCTTTTCGGGCTTGTGCTTCTTGGCAGCTATCT
GGCATTGGGTATATTGGGATCTAGAAATCTTTTGTGATGAACGTACAGGAAAACCCTCTTTGGATTTGCCCAAGATCTTT
GGAATTCACTTATTTCTCTCAGGAGTGGCTTGTTTTGGGTTTGGCGCCTTTCATGTAACCGGATTGTATGGTCCTGGAAT
ATGGGTGTCTGATCCTTACGGACTAACCGGAAAAGTACAA-TCTGTAAATCCAGCGTGGGGTGTGGAAGGTTTTGATCCT
TTTGTTCCGGGAGGAATAGCCTCTCATCATATTGCAGCGGGGACGTTGGGCATATTAGCGGGCCTATTTCATCTTAGTGT
CCGTCCGCCTCAACGTCTATACAAAGGATTACGTATGGGAAATATTGAAACCGTCCTTTCTAGCAGTATCGCTGCTG-TC
TTTTTTGCAGCTTTTGTTGTTGCTGGAACCATGTGGTATGGTTCAGCCACTACCCCGATTGAATTATTCGGGCCGACTCG
TTATCAATGGGATCAAGGATACTTCCAGCAAGAAATATATCGAAGAGTTGGCGCTGGGCTAGCCGAAAATCAAAGTTTAT
CCGAAGTTTGGTCTAAAATTCCTGAAAAATTAGCTTTTTATGATTACATCGGTAATAATCCGGCAAAGGGCGGATTGTTC
AGAGCAGGGGCAATGGACAACGGGGATGGAATAGCCATTGGGTGGTTAGGTCATCCTATCTTTAGAGATAAAGAAGGGCG
TGAACTTTTTGTACGTCGTATGCCGACTTTTTTTGAAACATTTCCGGTTGTTTTGGTAGACGGAGACGGAATTGTTAGAG
CCGATGTTCCTTTTCGAAGGGCAGAATC-GAAGTATAGTGTCGAACAAGTAGGTGTAACTGTTGAGTTTTATGGTGGCGA
ACTTAATGGAGTTAGTTATAGTGACCCGGCTACTGTGAAAAAATATGCTAGACGTGCTCAATTGGGTGAAATTTTTGAAT
TAGATCGTTCGACTTTGAAATCTGATGGTGTTTTTCGTAGTAGTCCAAGGGGTTGGTTTACTTTTGGACATGTTTCATTT
GCTCTTCTATTTT-TCTTTGGACACATTTGGCACGGTGCTCGTACCTTGTTTAGAGATGTTTTTGCCGGCATTGATCCAG
ATTTAGATGCTCAAGTGGAATTTGGAGCATTCCAAAAATTGGGAGATC------CAACTACAAGAAGW------------
----------GATACAATATGGATCTCTCACTTTATATTCTTTATTTTCT---TTTTGTAATTTGAC-A-TAGAGT----
------------------AT--TTGAATCGTCGCCTTT------------------------------------------
---TCCTCGAATCTTGCTCTTTTTTATTC------GGGGGGCGATCCCTAATAAATAGATATGGAAGTTATAAT------
TGTAAACCACGATCGAATCTATGGAAGCATTGGTTTATACATTCCTCTTAGTCTCGACTCTAGGAATAATTTTTTTCGCT
ATCTTTTTTCGAGAACCGCCTAAAGTTCCAACTAAAA---AGATCAAATGAT-TTTTT------ATTATCTTAGTTGAAG
TAAAGAGCCTCCCA-----A--------TATTGAGAGGCTCTTTACTTCAACTAGTCCCCGTGTTCCTCGAACGGATCTC
TTAATTGTTGAGAGGGTTGCCCAAAAGCAGTATATAAGGCGTACCCGGTAAAACTTACAAGTAAACCAGATATAGAGATA
GCGATCAGGGTTGCTGTTTCCATTATTATATAATTTCAAGACCATACTGGGTCTATGATAAGATCATATATTTACAACGG
AATGGTATACAAAGTCAACAGATCTCAATTAATACAAAATAGAATT--TATGGCTACACAAAATGTTGAGAGTAGTTCTA
AATCTGGTCCAAGACGAACTACTGTAGGGGATTTATTGAAACCGTTGAATTCGGAA--TATGGTAAAGTAGCTCCTGGAT
GGGGAACTACTCCTTTGATGGGTATCGCAATGGCTCTATTTGCGATATTCCTATCTATTATTTTAGAGATTTATAATTCA
TCCGTTTTACTAGATGGAATTTCAATGAATTAGATGTACAAGGACCACTAAGTCCTAACTTTTCAAT-AC-AAAGTGA--
--------------TTTGGTCTGAGA--TTTTTTTTAGTCCATTCTAT-TCTATTTTGGTAGTTCGATCGTGAAATTTCT
--TTTTTTCTGTATTTTTTGCATATGAGT-GTGCGGCTTGTTATAATGGATCCTA-TTGATAGTACAGAGAAAGGGCCTG
TC-----ATCTTGATAGAGATT--GCTTTTTACCCTGTCAGATATTTATTCTATTATCTGATATCTGAAGCACAGAAGAT
ATGAAATTG--ATTACGA------------------AGTATT-AGAACTATGATTCATACTTAATATTCAGATCCC----
--------------ACGACCCA--ACTC-----AAAAAAAATTTCAAATCTAAAAA--------------RWTTTCAAAT
-CTAAAAAGTTATAGGATA------------------------TAAATTCAAAGA----------------TTTTTATTT
TGTCAAACTC-TTTGTCTATGT-----TTTTTTTATCAAAGGG-----CAAATCCTTCT----TTTG-----ATTTTTAG
T---TAC--TATTTTTCTTCAATTCATTGAATAAGTGATGATACAACGATTCTTACTCAGGGAATCTTGGGTT--TAGTT
TGAAGGTTTTATTAAATCATCGTGAGTCGAGCATGAATCTGAGG-TTTT----------TTTC-AATCGCA-TT---TAG
GATCGTAACAAG-AAAATTTCTATCAATAATAAAGACAACAATCGTAAGACTG-ATTACATACAAATCAAAATA-CC---
--AAAAA------AAATGGAGAATATAGAAGATTCAAGAGGCCTGTAACGATTAACACTAAGAGATCAA-AGAGCCAACT
TGAAATTTTGGCATTATAACCACAAGAAAGAGTTGCCGAATTCGTGT-----TTTTTCGTATCATAATCTTCAGGGAAGG
TTG-TTTGAATCATAGAATT---AAGAAG---TTTTTTT---ACACATATTGGTTTCAACTAATATTTTTGTGTTTCTGT
TTGAGCTGTATGAAATGAAATTCTCATATACGGTTCTTAGAGGGGGAGTCTCCCTGGTTTACCTATCTCAATAAAGTCTA
TGATTGGTTCGAAGAACGCCTTGAGATTCAGGCGATTGCAGATGATATAACTAGTAAATACGTTCCCCCTCATGTCAACA
TATTTTATTGTTTAGGAGGAATTACGCTTACTTGTTTTTTAGTACAAGTAGCTACGGGGTTTGCTATGACTTTTTACTAT
CGTCCGACTGTTACT--GAGGCTTTTGCCTCTGTTCAATACATAATGACTG---AAGCTAACTTTGGTTGGTTAATCCGA
TCAGTTCATCGCTGGTCGGCAAGTATGATGGTCCTAATGATGATCTTGCACGTATTTCGGGTGTATCTCACCGGTGGCTT
TAAAAAACCTCGTGAATTGACTTGGATTACAGGTGTGGTTCTTGCTGTATTGACCGCATCTTTTGGCGTAACAGGGTATT
CTTTACCTTGGGACCAAATAGGTTATTGGGCAGTAAAAATTGTAACAGGTGTGCCGGAAGCTATTCCTGTAATAGGATCT
CCTTTGGTGGAGTTATTACGTGGAAGTGCTAGTGTAGGACAATCTACTTTGACTCGTTTTTATAGTTTACATACGTTTGT
ATTACCTCTTCTTACTTCTGTATTTATGTTAATGCACTTTTCAATGATACGTAAGCAAGGCATCTCTGGTCCTTTATAGA
------GAAATATAG-------A-------T-------AGTTGTAATCAATCAT-------------------------T
GGGGGAGGAAGATATGGTATTTCATTGCTATAAATATGGATTAT--------AAAAAAAAAAGAAGACATGTATTTGGAT
AATTTCCTTCAACTCC--------AAAAAAAA------------------TTGGATTTA--TTTATTTATATTTATTTTT
TTTA------------------CATTAATAGTTGAAGTGAATTTTCCTAATAAAA---AAAAATGGATTATGGGAGTGTG
TGACTTGGACTATTGATTTAGCCGTGCAGATATATGCCTTTATCCGCCACATTGGAATTCACAATTAAATGTGTCTTTGT
TCCACCAACCGCGAAAGCCCCATACAATA-C--AT-----A-GGGTATGCTACATAGTTTGAAGAGAATCTTTTCTATGA
TCAGACT-CYAATCATGTTGTGTTGCGCATGAAGAGGCTCCGTAAAATCCA--GTCGAATAAGTGATGTGGTAGAAT---
-----------CCATATTCTATTCTATTTTAG-----------CTAAT------ACTTTGT----------TTTATA---
------------------------------------------GTAGTATGGAAATGCAGCCATTTCTTCTGCATTGACTC
GATTTACGATATTATCGGAGTGAAACAAGGGATCTAMAGAATGCCAGAGGCTAAACCATATTAGTAACAAGTAAAGCCTT
TGTATGTAAAAAGAAAAAGTCTCGGTATTT--------------------------------------------------
--------------------------------------------------------------------------------
--------------------------------------------------------------------------------
------------------------------------------------------CGTATGGA---------------GTT
TCTAACATCT---AAACATATA----------------T---TTTTTATAGGGATGCGTTTGGTTCGTTTGATTCTTGCT
CGAGCTGGATGATGAAAAATTATCATGTCCAGTTCCTTTGGAGGATGGATTTAT--GAATTCACCTATCCCAATAACAAA
AAAACCCGATTTGACAGATCCTGTATTAAGAGCTAAATTGGCTAAAGGAATGGGTCATAATTATTACGGAGAACCCGCAT
GGCCCAATGATCTTCTATATATTTTTCCAGTAGTAATCTTAGGTACTATTGCATGTAATGTAGGATTAGCGGTTCTAGAA
CCATCAATGATTGGTGAACCCGCAGATCCATTTGCAACTCCTTTGGAAATATTACCTGAATGGTATTTCTTTCCCGTATT
TCAAATACTTCGTACAGTACCAAATAAGTTATTGGGTGTTCTTTTAATGATTTCAGTACCTGCGGGATTATTAACAGTAC
CCTTTTTGGAGAATGTTAATAAATTCCAAAATCCATTTCGTCGTCCAGTCGCGACAACCGTTTTTTTGATTGGTACCGTA
GTGGCCCTTTGGCTAGGTGTTGGAGCAACATTACCTATTGATAAATCTTTAACTTTAGGTCTTT-----TTCAAATTGAT
TCAATTAT---AAAAAAAAG-GCGCGATATGTTTATCTAGGGAATAATCACTTTAAGCTGAATTCT-CCCTAGATAA---
--AC-ATCTATTCA-ATGTT------AAAAAAGTTAAAAAAAA-GAAAAAGGTGTAAATAGGTCCATTGGATTTA-----
-----------AAATCGATTGCGAAATGCTTTTCTGTTTTTAGAATGTCTAATATATGTTTTACATCGTCTATGTGCAAA
TGTTCAATTTTCATAAGATCTTCTTGACTCTTATTTAAAAGGTCCAATAATGTATATATATTTGACCTTTTCAGGGAATT
ATAGATCTTCGGAGTCAATTCTAATTGATCAATAAAAATATATTTCAATGCAAGTGT----TT-----TTTTC-----TT
TTTCTTT------AGTTTAGCTAATCTATCA--------TGAAAAGTAAAAAGAGGTAAAGTAA------CCTTGTGCTG
A------TTTTTTTCTAAATGCGCGTTTTCTTCTTTTGCATGTAGAAAAAGAATAAATAAATTAATCAAAGTTCGAGAGG
CTTCATGAAGTGCTTCTTTAGGGGTTAAACTTCCATTTGTCCATATTTCCAGAAAAAGTATCTCGTGCTTTTCATTCCCG
TTTCCATAAGAATGAACACTATGATTT---GCGTTTTTAACGGGCATGAATGTAGCATCTATAGGATAAGTTTCATCTTG
AAAATTTTTTGGCG-GTTTTAGACGATAGCCG-------CGACCTCTCTCGATTTGTAATTCAATACGCAAATCAATAGG
TTCGGTTAGTTTAGCTATATACTGTTTATTATCAATGATTTCCACCCCAGGTGGGAGGATGATGTCTTGAGCAGTTACAT
ATCCAGGGCCTTTTACATAAATAGATGCGTTATGAGTTCCATACAAATTACTTCTCAATACAATTTCTTTTAAATTCATT
AAAATTTCATGTACCGATTCTTGAATACCTATTATAGTAGAAAATTCATG------TGTTATTTTATGA-GATTTTGATT
TTGCACATGTAATACATGTTCCTTCTATTTCTCCAAGCAAAGCTCTTCGCATCGCAATTCCTATTGTGTCGGCTTGACCT
TTCATAAGTGGAGACAGAATAAAACGTCCATAATAAAGACGCTTACCGGTGGCTCTTGATTCAATACACTTCCACTGTAG
TGTCCGAGTAGATATTCTTACTTTCT--CTCGAACCATAATAATTTTATTA-TTTTTT------TT-------GATCAAA
TAATTG----------AATTA----------TTTATTTCTCTTGAAATCTATTCAA----TG-----TTTTTTTTACACG
CGCCTTTTTTTCGGGGCTCTGCAGCCATTATGTGGCATAGGAGTTACATCTCGGACGAAACTTAATAGTATACCACTTCT
GCGAATAGCTCTTAATGCTGCATCTCTTCCGAGACCAGGACCTTTTATCATAACTTCTGCTCGTTGCAT-ACCTTGATCT
ACTACTGTTCGAATAGCAATTCCTGCTGCAGTTTGAGCAGCAAATGGGGTCCCTCTTCTTGTGCCTCTGAATCCACAAGT
TCCAGCGGAGGACCAAGAGATTACTCGGCCCCGGACATCTGTAACGGTCACAATAGTATTGTTAAAACTTGCTTGAACGT
GGATAACTCCTTTTGGTATTTTGCGTGCATTCCTACGTGAAGTACTACGTCCATTCTTGCGTAAACCAATTCTTGGTAAA
GGTTTTGGCATATTTTAT-CATCTCATAAATATAAGTCATAAGTTTATGGATATATCC-----ATTTTGTGTCAAAATAG
ATCTTTT------TTTTT-----TATTTGTA--------CGT-TGGATCTTTTAGCGAG-TCTCCGTTTACAAAGATTAT
CC--TTGTCTTTGTTTATGTCTAGGATTGGAGCAAATGACTTTAATGCGTCCCCGTCTCCGTATCAGTCGACATTTTTCA
CAAATTTTACGAACAGAAGCC--------CTTATTTTC---------ATATTTGTCATT-CCTTAATTT----------A
AAATATACATAT--------------TTTA--------------------------------------------------
--------------------------------------------------------------------------------
--------------------------------------------------------------------------------
---------------------------------------------------------------------------TTTTT
GAAGAA---AATAAGTTT----------CTTTTAAAA-------------------------------------------
-------------------------------------------------------C----------CCCC-GGTTTTATA
TGTATAAAAC------CGCGTGGGGTCTTTCCTTTCTCGAAACAT-----------------------------------
--------------------------------------------------------------------------------
------------------------------------------AAATAT-CTACTAATGTAG---G---------------
----------------AAC---TTGTTCCTT---------------------TCCC-----CCCCCCACTTTTTTTC---
-------ACAAATAGA-----AAGTCCAGA------TACAAT-----TT---TGAAAGGATTACCATATATAACACAAGA
TTTCTCCACCGATTCTTTTTAGTCGGGCTTCTCGGTCTGTCATTATACCCTGAGAAGTAGAAAGAATTACAATCCCCATT
CCGCCTAAAATTTTAGGAATTTGTTGATAGTTGGAATAGATACGTAAACCGGGTCGACTGATCC-GTTTTAAATTTATAC
TTGTTTTATATGACCCTTTTCTATTCCTTCTATGCCGTAGAGTTAAAACCAAAAAATTTTTGTTTCCTTCTTGGTGTTTC
CTCACATTTTCAATAAAACCCTCTTGTAAAAG-TATTTTAATAGTGTGTTCCGTAGTGGTAGTAGATCTTATTCGAATGG
TTCCTTTTTTATTCAT------------GTCAGCATTTCTTATAGAAGTTATTATGTCAGCAATAGTGTCCCTATTCATG
ATAAACTAAAACTTTTG------TTGTTCCCTAACTTGGA------TATAATCAACATATTCA-----------------
----------------TT----TT-------TTTTTATGAAAAAAAA--------------------TTTA-----T-T-
AAAGA---------TATATACGTGAAACA----------------CAATCT------ATTA-------------------
--------------------------------------------------------------ATT-TTATCTATTA----
--------------TAT------ATTATA------TG------------------CTTTTTTATAATACTTCAGGTGCTA
ATGAAACTATTTTAGTAAAATTGAATTGTCTCAATTCCCGGGTAATCGCACCAAAAATTCGAGTTCCTTTTGGATTTCCT
TCTTGATCAACGACAACTGCAG--CATTGTCATCATATCGTATTATCATACCGTTGTTGCGTTTGAGTTCTTTACTGGTA
CGTACGATTACAGCTCTGATCACTTCGGATCTTTCTAGAGGTGAATTTGGTATTGCTTCTTTGATCACAGCAACAATAAC
GTCACCAATATGAGCATATCGGCGATTATTAGTTCCCAGGATTCGAATGCACATTAATTCTCGGGCTCCG--------CT
ATTATCTGCTACATTCAA--ACGGGTCTGAGATTGGATCATATCA-TTTTTGAAATCTGTTATTTCAATGCAAAGG----
ACAAA----------------------AAAAGAA-------ATAT---TATTTGTT------CA----------------
------------------AA--AAA-----------ACTTGCGA---TTTTTT--CATCCCCAAGACCCCTT--------
-TAGTTTCATTTTCTATTCCTATTTCCTATCCTGAAATAATGAATTGAGT-TCGTACAGGCATTTTTGACGCTGCTATTG
AAAAAGCCTTTTTGGCTATACTTTCTGCTACTCCGCTCATTTCATAAAGTATTCTTCCTGGTTTAACAACAGCTACCCAA
TATTCAGGAGATCCCTTTCCCGAACCCATGCGTGTTTCTGTGGGTCTTACAGTAACAGGTTTGTCGGGAAAAACACGTAC
CCATATTTTTCCACCGCGGCGCGCATTTCGTGTCATTGCCCGCCGCCCTGCTTCTATTTGTCGAGCTGTAATCCAAGCGG
GTTCAAGTGCTTGAAGAGCATATCTACCGAAAGAAATACGATTACCTCGATAAGATATTCCTTTCATCCTTCCTCTATGT
TGCTTACGGAATCTGGTTCTTTTGGGGTTCTAGTTGATGGTTGTTTCTCAATTCCATCTCTACTACAAAACCGGACATGA
GAATTTCTTCTCATCCAGCTCCTCGCGAATGAAATTAT-AAAAAAA-------TGAAATGATTA-TAAAAATATACA-TA
G-----AGTTGATGAATAG-------------------TCTACTGAAT--GCTGGAATCCTTTGAAATTTCATCTA----
--------------ATTTATTT--ATTAT--------TATTGGAAATT-----AGTATATTTTGTTTTTAG---------
---------------TTTTAGTTAA----------AAAAC----------------------------------------
--------------------------------------------------------------------------------
--------------------------------------------------------------------------------
--------------------------------------------------------------------------------
--------------------------------------------------------------------------------
--------------------------------------------------------------------------------
--------------------------------------------------------------------------------
-------------------------------------------------------------TAAATA-------------
--------------------------------------------------------------------------------
--------------------------------------------------------------------------------
--------------------------------------------------------------------------------
--------------------------------------------------------------------------------
--------------------------------------------------------------------------------
---TCCC-------T----------------CCTA-----------ATG-------AATCATTAAGA----------TTC
ATTTTCA-------A-------TA---------GCATCTTATGCATTCATAGGTTCCGTCGTTCCCGTCACTTCTCAATT
ATTGGTTAGGTCTTAATTTTATAATGGAGCACT--AATAAAAA--TTATTCTTA-AATCAATCTTCTCAATCTTTT----
---TTGACTCGAGGCTCGTGA------T---TTTTTTTCTATAAATATGAAGAAATTCATTTAATTATAGATTTTTTGGT
AGTG-------ATGCTTTATTACATTAGC-------TTTTATATGAGATGACTCATAGACCTTACATA-TTGGTATTGAA
TTC----------TATATATATATA-----TATATTTTCT-----ATCTTTCTCTCTCCTTTCCATTTATCTGCAAAATT
GGA-ATTTTG-----CTTTTCAATTCA--AAATCCGATTCATTTTAC-----TTTTTTTTATGTACTTTATGTAAAAA--
----TAAGATTTGAA--TTGCTACAAT-GATATAAC--CAAT--------------------------------------
--------------------------------------------------------------------------------
--------------------------------------------------------------------------------
--------------------------------------------------------------------------------
--------------------------------------------------------------------------------
--------------------------------------------------------------------------------
------------------------------------------------------------------AAAGAATGAAAGAG
GTTGTCATTTTTTGT-TCTTT-----------------------------------------------------------
----------------------------------TCCTCGTTTCCAAATGTCCA-AATTTTTATACCTAATACTCCATAA
ATAGTTATAACTGTATAGGAACAATAATCAATTTTAGCTCCAATGGTTTGTAGAGGAACCCTACCTTCTCTAATCCATTC
AACGCGTGC----------------AATTTCTTTTCCGTC-------------------AAGACGCCCCGCAATTTGTAT
TTGAATTCCTTTTGTATCCGCTTGTTTAGTTAATTCAA-----------TAGCTTTTTTCATTGCCTTGCGAAAGGGGAC
TCGATTCTTTAATTGTCCGGCTATAAATTCTGCAAGAATAGTAGGGTGTTTGTACGGTTTTTTAATTCTTTTAATCGAAA
TGTTCAGCTTTTGGTTCACACAATTAAGTTCTTTTTGTACATTTAGTTCTAATTCTTCGAGTTTTTTACTTTTAGGTTTA
GTTTCTATTAAAAATTTTGGGAATCCC--ATATATATTATAACCTGAATTACATCAATTCGTTTTTGAATCGTTATACGT
GAAATTCCTTCAACACCAAAAGAAACTTTCATATCTTTTTGTACAAAATTCTTAATACAGTTTCTTATTTTTTTATCTTC
TTGTATACCTTCGGAATAATTTTTTGGTTGTGCAAACCAAATTGAATGGTGATCTTGGGTTGTACCAAGTCTGAAACC--
-----------------------AAGTGGATT--------TATTTTTTGTCCCATAATCCCTCACTACTAT-ACATATGA
TGAGATGTTATACCCGTGGATTTTTTTTCTTTATCCCCCCCGATTTCTTTTAG--------CGAT--TCTT---------
-TTAAGCATA---GGGT-------ATATTCTTC---------ATAGAA------------------------------TT
TTTCATA---------ATAAAATT----------CTTGATAGAAGGATATATCTATTAGTACAATAGTTATATGGCAAGT
TGGTCTTTTTATTAGAGAATTGCGACCTCGAGCCCGAGGTTTTAATCTTTTCATAGTAGCACCTTCGTTAACTTCGGCTT
TACTAATGACTAAACTTGCTTCGTTAAACCCCCTATTGTGACTAGCATTTGCTGCGGCAGAATAAACTAATTTAAAAATA
GGATAACATGTTCGATAAGGCATGAGCTCTAGTATCATAAGTGTTTCTTCGTAGGAACGTCCACGAATCTGATCAATAAC
TCTTCGTGCTTTGTGGGCAGACATACATATATGTTGACCTAAAGCATATACATAAGGA------GATAATTTTTTCCGTC
TCTT------------------------CTTTATCATAAGATTCAC-----------------------CTCAAAG----
---------AACTA-TA-A-AAAAGTATT-T-TATT------------------ATTAAT------------------GT
AAGTA---------AAGAGAGAAG----------CATCTAG------AATGTA------TATATCTATCTTTCT------
----------TTTTT----T------TATTAACGACGAGATTTATTATCATTTTTTGTGTGTCCCCGGAAATATAGAGTA
GGTGAAAATTCTCCCAATTTATGACCCACCATATGATCTATTATATAAATAGGTAAATGTTCCTTTCCATTATGGATAGC
AATAGTATGGCCAACCATTGTGGGTATAATAGTAGATGCTCGGGACCACGTTACTATTATTTCTTTTTCTGCCTTTGTGT
TAAGTTTATTTATTTTTCTTAATAAATGATTTGCTACAAAAGGGTTTTTTTTT--AGTGAACGTGTCACAGTAAATTTC-
----TCCTATTTTTT-TTTTTTTTTTGAAAAGACGAAGAAACAAAGTCTATTTTCTCTCCTA-----TTTACTACGGCGA
CGAAGAATCAAATTATCACTATATTTATTCCTTTTTCTACTTCTTCTTCCAAGTGCAGGATAACCCCAGGGGGTTGCGGG
TTTTTTTCTACCAACAGGGGCCCTCCCTTCACCACCCCCATGGGGATGGTCTACAGGGTTCATAACTACTCCTCTTACTA
TAGGACGCTTACCTAGCCAACATTTAGATCCGGCTCTACCCAAACTTTTCTGGTTCACCCCAGCATTCCCTACTTGTCCG
ACTGTTGCTGAGCAGTTTTTGGATATTAAACGAATCTCCCCAGAAGGTAATTTTAATGTGGCCGATTTCCCCTCTTTTGC
AATCAGTTTCGCTACAGCACCTGCAGCTCTAGCTAATTGTCCACCCTTTCCAAGTGTGATTTCTATGTTATGTATGGCCG
---TGCCTAAGGGCATATCGGTTGAAGTAGATTCTTCTTTTTGATCAATCAAAACCTCTTCCCAAACCGTACAAGCTTCT
TCCAAAGCATACGGCTTTCTGGGTGTAGATGATGATATCTATACAGATGGATCTTATCTATCATACAATGAAGT-AAAGT
ACTACATGAGTGGATATATAGGAATCCAAATCTGCCGAATCACTCATGTTATGCTCTTCTACATCCTAGGTCTTCCCGTT
CCCTCATCTGGCTTATGTTCTTCATGTAGCATTCAGATCGAATGACTCTATGAAATTACGTCGATACTTCCACATATTAG
GGGTAACGTAGGAGACATCTCTATTTTTCCCCCGG-GGAATCTTTAGAATTACCACTGCTTAGCTTTCAATTCGTCTCTG
ACCATCAAATGAAATGTGAATAACCCGTCCTCCTCTCTTTGAAACAAGGGGCGCTTCTGGTTCTGTCGGTGCTTGAAACA
ATTTTGTCTTCTCCATATTACTATATCTCTAGAGTCAATAATTTTATATGAGGAACTACTGAACTCAATCACTTGCTGCC
GTTACTCTTCAGTTTTCTGTTGAGGTCTATCCTGTAGAGGTACTCAAATTGGATCAGTGATCGATTTCTAGGTTTCGTCG
TAAACCTAATTGGTTACTTCCAATTACGTAAATCAATAGTTCAAACCGCACTCAAAGGTAGGGCATTTCCCATTTTTATA
GGAACTTCTGTACCAGAAATAATGGTATCTCCAATTATAGCCCCTCTGGGATGTAAAATATATCTCTTCTCACCATCCCC
ATAGTGTATGAGACAAATGTATGCATTTCGATTAGGGTCGTATTCTATGGTTACGATTCTACCATATATGTCTTTTTCAT
TCCGTCGAAAATCGATTTTACGGTATAGACGCTTATGACCCCCCCCTCTATGCCTTGCGGTAATGATTCCTCTAGCATTA
CGTCCTTTACCACAACGATGCTGTCCATAGATCAAATTATTTCGTGTATTGGATTTTACTTGACTGTCTACGGCTCCATT
GCGTGTGCTCGGGGTAGAAGTTTTGTATAAATATATCGCCATGCTATTAAGTATTTTGATTTAAGTTAAGTTCTTTTCTT
TCTAAGAGGTGGAATAGAATAACCCGGTTGAAGCGTAATGATCATACGTTTGTAATGCATTGTATGTCCCATAATAGGTC
TCATTCTTCTGCCCTTTCCCGGGAGTCGATGGCTATTCATAGCTATTACCTTGACACCAAAGAAGAGTTCGACCCAATGC
TTTATTTCTGTCCTAGTTGATCCTAATTCGACATTAAAAGTATATTGATTTTTCCCCAATAACTGAATACTTTTGTCTGT
AAATACTGCATATTTGATTCCATCCATAAATCTATTTTCTTCCCTATGAGTTCTAGTCTCAGTAAGAATGCTAGTTCTTA
CTGTTCATATGTTATGATATGAATATACCACACCAATTCGTTATGTATGGATGATGAGATTCCATTGATACAGAGCCAAT
TCCAATAGACTTATTGGAGGGTCCCATTGGCGTGCATCCAGTAGGAATTGAACCTACGAATTCGCCAATTATGAGTTGGG
CGCTTTAACCATTCAGCCATGGATGCTTAGCGGGGATCCTCGTACATGGTGAATAACCAAATTCCAATTGAAATGAAATC
TTTAGGATAAAACAATGCAATTTAGGAGGAATC-----AATGAAAGGACATCAATTCAA---ATCCTGGATTTTCGAATT
GAGAGAGATATTGAGAGAGATCAAGAATTCTCACTATTTCTTAGATTCATGGACCCAATTCAATTCAGTGGGATCTTTCA
TTCACATTTTTTTCCATCAAGAGCGTTTTATAAAACTCTTGGACTCCCGAATTTGGAGTATCCTACTTTCACGCAATTCA
CAGGGTTCAACAAGGAATCAATATTTCACGATCAAG---GGTGTAGTACTATTTGTAGTAGTGGTCCTTATATATCGTAT
TAACAATCGAAAGATGGTCGAAAGAAAAAATCTCTATTTGACAGGGCTTCTTCCTATACCTATGAATTCCATTGGACCCA
GAAATGATACATTGGAAGAATCCTTTGGGTCTTCCAATATCAATAGGTTGATTGTTTCGCTCCTGTATCTTCCAAAAGGA
AAAAAGATCTCTGAGAGCTGTTTCCTGGATCCGAAAGAGAGTACTTGGGTTCTTCCAATAACTCAAAAGTTTATCATGTC
TGAATCTAACTGGGGTTCGCGGTGGTGGAGGAACTGGATCGGAAAAAAGAAGGATTCTAGTTGTAAGATATCTAATGAAA
CCGTCGCTGGAATTGAGATCTCATTCAAAGAGAAAGATATCAACTATCTGGAGTTTCTTTTTGTATA---TTATATGAAT
GATCCGATC--CGCAAGGACCACGATTGGGAATTGTTTGATCATCTTTCTCCGAGGAAGGGGCGAAACATAATCAACTTG
AATTCGGGACAGCTATTCGAAATCTTAGTGAAAGACTGGATTTGTTATCTCATGTTTGCTTTTCGTGAAAAAATACCAAT
TGAAGTGGAGGGGTTCTTCAAACAACAAGGAGCTGGGTCAACTATTCAATCAAATGATATTGAGCATGTTTCCCATCTCT
TCTCGAGAAAGAAGTGGGCTATTTCTTTGCAAAATTGTGCTCAATTTCATATGTGGCAATTCCGCCAAGATCTCTTCGTT
AGTTGGGGGAATAATCCGCACGAATCGGATTTTTTGAGGAACATATCGAGAGAGAATTGGATTTGGTTAAACAATGTGTG
GTTGGTAAACAAGGATCGGT------TTTTTAGCAAGGCACGAAATATATCGTCAAATATTCAATATGATTCCACAAG--
---ATCTAGTTTCGTTCAAGGAAGGGATTCTAGCCAATTGAAGGGATCTTCTGATCAATCCAGAGATCATTTCGATTCCA
TTAGGAATGAGGATTCGGAATATCACACATTGATCAATCAAAGAGAGATTCAACAA---CTAAAAGWAAAAGAAAGATCG
ATTCTTTGGGATCCTTCCTTTCGTCAAACGGAACGAACAGAGATAGAATCAGACCGATTCCCTAAAAGCCTTTCTGGATA
TTCCTCAATGTCCCGGCTATTCGCGGAAGGTGAGAAGGAGATGAATAATCATCTGCTTCCGGAAGAAATTGAAGAATT--
-------TCTTGGGAATCCTACAAGATCCATTCGTTCTTTTTTCTCTGACAGATGGTCAGAACCTCATCTGGGTTCGAAT
CCTACTGAGAGGTCCACTAGAGATCAGAAATTGTTGAAGAAAGAACAAGATATTTCTTTTGTCCCTTCCAGGCGATCGGA
AAATAAAGAAATAGTGAATATATTCAAGATAATTACGTATTTACAAAATACCGTCTCAATTCATCCTATTTCATCAGATC
CGGGATGTGATATGGTTCTGAAGGATGAACTGGATATGGACAGTTCCAATAAGATTTCTTTCTTTMCAAAAAATCCATTT
TTTGATTTATTTCATCTATTCCATGATCGGAACGGGGGGGGATACACGTTACACCACGATTTTGAATCAGAAAAGAGATT
TCAAGAAATGGCGGATCTATTCACTCTATCAATAACCGAGCCGGATCTGGTGTATGATAAGGGATTTGCCTTTTTTATTG
ATTCCTACGGATTGGATCAAAAACAATTCTTGAATGAGGTATTCAACTCCAGGGATGAATCGAAAAAGAAATCTTTATTG
GTTCTACCTCCTATTTTTTATGAAGAGAATGAATCTTTTTATCGAAGGATCAGAAAAAGATGGGTCCGGATCTCCTGCGG
GAATGATTTGGAAGATCAAAAACAAAAAA------TAGTGGTATTTGCTAGCAAC------AACATAATGGAGGCAGTCA
ACCAATATGGATTGATCCGAAATCTGC------------AATATAGCACCTATGGGTACATAAGAAATGTATTGAATCAA
TTCTTTTTAATGAATAGATCCGATCGCA------AATATGGAATTCAAAGGGATCAAATAGGAAATGATACTCTGAATCA
TAGAACTATAATGAAATATACGATTAACCAACATTTATCGAATTTGAAACAGAGTCAGAAGAAATGGTTCGATCCTCTTA
TTTTTCTTTCTCGAACCGAGAGATCCATGAATTGGGATCCTAATGCATATAGATACAAATGGTCTAATGGGAGCAATAAT
TTCCAGGAGCATTTGGAACATTTCATTTCTGAGCAGAAGAGCCTTTTTCAAGTA--GTGTTCGATCGATTACGTATTAAT
CAATATTCGATTGATTGGTCTGAGGTTATCGACAAAAAAGATTTGTCTAAGTCACTTCGTTTCTTTTTGTCCAAGTTACT
TCTTTTTTTGTCCAAGTTTCTTCTCTTTTTGTCTAACTCACTTCCTTTTTTCTTTGTGAGTTTCGGGAATATCCCCATTC
ATAGGTCCGAGATCCATATCTATGAATTGAAAGGTCCGAATGATCAACTCTGTAATCAGCTGTTAGAACCAATAGGTCTT
CAAATCGTTCATTTGAAAAAATTGAAACCCTTCTTATTGGATGATCATGATACTTCCCAAAAATCGAAATTTTTGATCAA
TGGAGGAACAATATCACCATTTTTGTTCAATAAGATACCAAAGTGGATGATTGACTCATTCCATACTAGAAATAATCGCA
GGAAATCTTTTGATAACACGGATTCCTATTTCTCAATGATATCCCACGATCAAGACCATTGGCTGAATCCCGTAAAACCA
TTTCATAGAAGTTCATTGATATCTTCTTTTTATAAAGCAAATCGACTTCGATTCTTGAATAATCTACATCACTTCTGCTT
CTATTGTAACAAAAGATTCCCTTTTTATGTGGAAAAGGCCCGTATCAAGAATTATGATTTTACGTATGGACAATTCCTCA
ATATCTTGTTCAT------TCGCAACAAAATATTCGCTTTGTCTTTGTGCGGCGGTAAAAAAA-A-ACATGCTTTTTTGG
AGAGAGATACTATTTCACCAATCGAGTCACAGGTATCTAACATATTCATACCTAATGATTTTCCACGAAGTGGTGACGAA
AGGTATAACTTGTACAAATCTTTCCATTTTCCAATTGGATCCGATCCATTCGTTCGTAGAGCTATTTATTCGATCGCAGA
CATTTCTGGAACACCTTTAA-CAGAGGGACAAATAGTCAATTTTGAAAGAACTTATTGTCAACCTCTTTCGGATATGAAT
CTATCTGATTCAGAAGGGAAGAACTTGCATCAGTATCTCAATTTCAATTCAAACATGGGTTTGATTCACACTCCATGTTC
TGAGAAAGATTTACCATCCGAAAAGAGGAAAAAACGGAGTCTTTGTCTAAAGAAATG----------CGTTGAA------
------AAAGGGCAGATGT-ATAGAACTTTTCAAC---------GAGATAGTGCTTTTTCAACTCGCTCAAAATGGAATC
TATTCCAAACATATATGCCATGGTTCCTTACTTCGACAGGGTACAAATATCTAAATGTGATATTTTTAGATACCTTTTCA
GACCTATTACCGATACTAAGTAGCAGTCAAAAATTTGTATCCATTTTTCATGATATTATGCATGGATTAGATAGATCATG
GCGAATTCTTCAAAAAAAATTGTGGAAGACACAATGGAATCTGATAAGCGAGATTTCCAGTAAGTGTTTACATAATCTTC
TTCTGTCCGAAGAAATGATTCATCGAAATAATGAGTCACCATTGATATCGACACATCTGAGATCGCCAAACGTTCGGGAG
TTCCTCTATTCAATCCTTTTC---------CTTCTTCTTGTTGCTGGATATCTCGTTCGTACACA--------TCTTCTC
TTT---------GTTTCCCGAGCCTCTAGTGAGTTACAGACAGAGTTCAAAAAGGTCAAATCTTTGATGATTCCAGCATA
CATGATTGAGTTGCGAAAACTTCTGGATAGGTATCCTACATCTGAACTGAATTCTTTCTGGTTAAAGAATCTCTTTCTAG
TTGCTCTGGA-ACAATTAGGAGATTTTCTAGAAGAAATACGGGGTTCTGCTTCTGGCGTCAACATGCTATGGGGTGGTGG
TCCCGCTTATGGGGTCAAATCAATACGTTCTAAGAAGA------AATTTTTGA----ATATCAATCTCATCAATCTCATA
AGTATCATACCAAATCCCATCAATCGAATCACTTTTTCGAGAAATACGAGACATCTAAGTCATAGAAGTAAAGAGATTTA
TTCATTGATAAGAAAAAGAAAAAACGTGAACGGTGATTGGATTGATGATAAAATAGAATCCTTGGTCGCGAACAGTGATT
CAATTGATGATAAAGAAAGAGAATTCTTGGTTCAGTTCTCCACCTTAACGACAGAAAAAAGGATTGATCAAATTCTATTG
AGTCTGACTCATAGTGATCATTTATCAAAGAATGACTCTGGTTATCAAATGATTGAAGAGCCGGGAGCAATTTACTTACG
ATACTTAGTTGACATTCATAAAAAGTATCTAATGAATTATGAGTTCAATACACCCTGTTTAGCCGAAAGACGGATATTCC
TTGCTCATTATCAGACAATCACTTATTCACAAACCTCGTGTGGGGCGAATAGTTTTCATTTCCCATCTCATGGAAAACCC
TTTTCGCTCCGCTTAGCCCTACCCCCCTCTAGGGGTATTTTAGTGATAGGTTCTATAGGAACTGGACGATCCTATTTGGT
CAAATACCTAGCGACAAACTCCTATGTTCCTTTCATTACAGTATTTCTTAACAAGTTCCTGGATAACAAGCCTAAGGGTT
TTCTTATTGATGATAGTGACGATATTGATGTGAGTGACGATCTCGACCGTGACCTTGATACGGAGCTGGAGCTTCTAACT
AGGATGAATGCGCTAACTATGGATATGATGCCGGAAATAGACCGATTTTATATCACCCTTCAATTCGAATTAGCAAAAGC
AATGTCTCCTTGCATAATATGGATTCCAAACATTCATGATCTGGATGTGAATGAGTCGAATTACTTATCCCGTGGTCTAT
TAGTGAACTATCTCTCCAGGGATTGTGAAAGATGTTCCACTAGAGATATTCTTGTTATTGCTTCGACTCATATTCCCCAA
AAAGTGGATCCCGCTCTAATAGCTCCGAATAAATTAAATACATGCATTAAGATACGAAGGCTTCTTATTCCACAACAACG
AAAGCACTTTTTCACTCTTTCATATACTAGGGGATTTCACTTGGAAAAAAAAATGTTCCATACTAATGGATTCGGGTCCA
TAACCATGGGTTCCAATGTACGAGATCTTGTAGCACTTACCAATGAGGCCCTATCAATTAGTATTACACAGAAGAAATCA
ATTATAGACACTAATCTAATTAGATCTGCTCTTCATAGACAAACTTGGGATTTGCGATCCCAGGTAAGATCGGTTCAGGA
TCATGGGATCCTTTTCTATCAGATAGGAAGGGCTGTTGCACAAAATGTATTTCT--AAGTAATTGCCCCATAGATCCTAT
ATCTATCTATATGAAGAAGAAATCATGTAATGAAGGGGATTCTTATTTGTACAAATGGTACTTCGAACTTGGAACGAGCC
TGAAGAAATTGACGATACTTCTTTATCTTTTGAGTTGTTCTGCCGGATCGGTTGCTCAAGACCTTTGGTCTCTACCCGGA
CCCGATGAAAAAAACGGGATCACTTATTATGGACTTGTTGAAAATGAT--TCTGATCTAGTTCACGGCCTATTAGAAGTA
GAAGGCGCTCTGGTGGGATCCTCACGGACAGAAAAAGATTGCAGTCGGTTTGATAATGATCGAGTGACATTGCTTCTTCG
GCTCGAACCAAGGAATCCCTTAGATATGATGCAAAATGGATCTTGTTCTAT-------CCTTGATCAGA------GA---
---TTTCTCT------ATGAAAAATACGAATCGGAGTTTGAAGAAGGGGAAGGAGAAGGAGT--CCTCG------ATCCA
CAACAGATAGAGGAG------GTTTTATTCAATCACATAGTTTGGGCTCCTAGAATATGGCGCCCCTGGGGCTTTCTATT
TGATTGTATCGAAAGGCCCAATGAATTGGGATTTCCCTATTGGGCCAGGTCATTTCGGGACAAGCGGATCATTTATGATG
AAGAGGATGAGCTTCAAGAGAATGATTCGGAGTTCTTGCAGAGTGGAACCATGCAGTACCAGATAGGAGATAGATCTTCC
AAAGAACAAGGCTTTTTTCGAATAAGCCAATTCATTTGGGACCCTGCGGATCCACTCTTTTTCCTATTCAAAGATCCGCC
CTTTGTCTCTGTGTTTTCACATCGAGAATTCTTTGCAGATGAAGAGATGTCAAAGGGGCTTCTTACTTCCCAAACCAATC
CTACTACATCTATATATAAACGCTGGTTTATCAAGAATACGCAAGAAAAGCACTTCGAATTGTTGATTCATCGCCAGAAA
TGGCTTAGAACCAATAGTTCATTATCTAATGGATTTTTCCGTTCTAATACTCTATCCGAGAGTTATCAGTATTTATCAAA
TCTGTTCCTATCTAACGGAACGCTATTGGATCAAATGACAACGGCATTGTTGAGAAAAAGATGGCTTTTCCCGGATGAAA
TTGGATTCATGT----AATAGG-AGAAAGGT-------------------------------------------------
-----------------TTCCCATTCCTTAGCATGAAAGATATGTGGCCATGAAATA-GGGATTAAGTGGAACAGAATTG
AT------TGGGTGGTAAAGTCGTGGAAAGACCTCTTTCTTCCATATTTTGGACATGGAGGAATATGTTACTGCTGAAAC
A--TGGAAGAATTGAAATCTTAGATCAAAACACTATGTATG-KAAATTTGTATCCATTGAGCCAAGAATTCTTGAACAA-
CGAGCAACCAGAGCTATTACTCACTACATCAAAAAATTTCCATTAATGAAAGATGTAAATCCATTGGAAAATCAAAAATA
CGT-ATGTC------------GGATGAAATGATGGTTCTTGCTATCTGCTCCAA------TAACGAATCAT---------
---TGGTTTAACTGAATAACTAACTGAATAACTAAATAAAATAGATAG------------AAC-----------CTTC--
-----TCTTCGTCTCAGGTCGATGGATCTTCTCAATTGGAAGATCCCCTATATGGATAATACACATTCCAGTCGACCGGG
CCTAATTCTAATTGTTTTGTTCCGAAGCAAAGATATCCACGGGGCGGTTCGT---------CCTATTCAGATATTCA--C
GACCAAGAAGTACCGGATTCTCT----TTCGGATAGTCCC--TGAAA---------GGAGAAGGAAGGATGGAATGCCAA
CAGACGCCT--------ATTGTTGAATTCACCCGACCCGATAGT-ACCCA--TTTTTTTGG-GGACCATCCAGTGCCAAA
GTCACTGAATGGGTAAGTCGCCAATCCCT------------AAAACGGACTATGTAATGTACTTTATCTGTTGGGTGACG
GGCGGGCAT--------TTTATCAGAGGTTTCTATTGTATCAATCTACTCT-TGTGTAATTCCTGTTGAAGCATATA-CT
C-GGGGGTGGTTGCAGGGCGAACGATTTCAAAGCGAACTCCCCATTCATTAGATAGAGAAGATCATCAAGAT--------
TTCGT----GATCCACTGCCGAACTTATT-CCAATTCAATAAGAGATCTCTTATTGATATT-----GAAKACTCGAACCT
CCACGCTCTTTAGCACGAGATTTTGAGTCTCGCGTGTCTACCATTTCACCACCAAGGCATCTTGAAAGTGAATCGTATTC
CATGAATATGATATCTATCTAGTGTGA--TGTATGGAATAT---------ATGACAAAGGTGGAGTGTTGGAGTATTTCT
ATTGATCGTTCATGTCA--------TATAGGCCCGAGTCGGACATC---------------CAATTGCTTCGATTTGAAT
---------------TATCCG---------GAACATGC---------------------CTTAT-----------ATAYA
------TKMCTTATATA-TATTA---TATCAAAAAAA----TGGACA-------------ATCAAACCCATTTC------
-------TCGATTCAATAGACGCCCAAAGAGGTGAATAGAATAGGGTC-----CCAAATAAGGAGAGATATATATGTAAA
AAGCAGGTCCGATTACGCCTATTC----CTAATCCTAAATGGAATG-----------TAACGACGGA-------------
---------GGGGTCCATATG---TAAACATA-GTAT-CTATTTAGATACGCTCGAATGACCWKAGATAC----------
----------G-----CTCGAATGA--------------------CCCCTT--------------------CTCAT----
----------------AATGAGAATGTATAT--AAGCCTATTCCGGCCTGGTCCGGTATGGAATGAACTTATAATCCTGG
AATCGACTCGATTATCAGATTATAAGTTCATAACCCTAGCCCATTCCCATTTTGGGCGGAACAGATCTACTAATTCTTTG
ATTCCAGTTAGTAAGAGGGATCTTGAACTAAGAAATAGGTTCTAGAAGCTAAAAAAGGGTATCTTGAGCAATTTCAATAA
TCGGGTTCATTGATATTCCTGGTATAGTAGATGCTATTACACATACAATCATACTCAATTCGATGGAATTGTTTGATCTT
AAAGGGGATCTTCTAT--AATTTCGCACGTGAGGGGTTATTTCTTGGTTTCGTCCAGTCATTAATAACTTGATTATTTTT
AGATAATAGTAGATAGAAAGAACGCTCGTAAGGAGTCCTATTGAAACCAACAAATATAGGCCTGCCTGCCATCCACACCA
GAATAAATGGAGTTT---TCCGAAAAAACCTGCTAGTGGAGGAAGACCTCCTAGGGATAAGAGACATAGGGCTAAAGAGA
GAGCCAAAAAAGGATCTTTCGTGTATAATCCTGCATAATCTCGAATGTTATCAGTTCCGGTACGTAGACCAAATAATACA
ATGCAAGCAAAAGTTCCTAGATTCATGGAGATATAGAAGAAGATATAAGTTATCATGCTTGCATATCCACCATTTGAGTC
TCCAACAATTATTCCAATAATTACATATCCGATTTGACCTATGGACGAATATGCAAGCATACGTTTCATGCTTGTTTGAG
TAATAGCAATGAGATTCCCCACTATCATGCTCAGAATAGCTAGGATTTCCAGAAGAAGAT-GCCATTCGTTTGATGAGAA
ATAAAAAGGAATATCGAAAATTCGAGTGGCTGAAGCTGAAGCAGCTACTTTCGAAGTAACAGAAAGAAAAGCAACGACTG
GAGTGGGAGAGTCAGAGTCGAAAAGAGGATTCCTCACTTCTTTCTCTCATTCAAAACCGTGCATGAGACTTTCATCTCGC
ACGGCTCCTAAGTGATAAAA--------GAAAGAAGAACTCATCTTCTTTCTTTTTTGATTACCTTCCTCGCGTATGTAT
AAGACCGAATCTATTCGATTTCT------AAAAAGGATGACTAATCCTTAACTTTTCGA--------GGAATCC------
--TTCATCAG--------TGG-------TTGTAATTTTTCTCAATCTTTCTGACTCTTTCTGACT--------TGCTCCT
A----------CGGAAC-----CAAGAGGTCGAAAAGATTGAGAAATAGAACCATCTGATTTGATTCGTTCTCAATAGCC
ATGAGATGATCATCTTAGGGTGATCCTTTTGTCGACGGATGCTCCTATTACACTTGTAGTCTCTGAAGGATGAGAACCAA
CTATGTAGCATCTA-CATCGAGAATTGAAATATTGTATACGTCATTAGTCCGATCTTTTGTAGGAGCTACCCGTAATAAC
GAACTTGCAAAATGAATC-TATTTATCATAAAGAGATTCGTTGTTCCTGACGCTGCTTCACCTTAATTGTTATTTGAACA
AGTAAAAGTTATGTCTTGGTCCGAGTGCGGATAGCATTTCTCTTCTGCATGTCCATGGAGTTTTGAAAAATCCAAGCATC
TCAGAGATAGAT--AGAGAAGTAG--GAATTTTTCGAACGAACCGCACTCCTTCGTATACGTCAGGAGTCCATTGATGAA
AAGGGGCTAGGGAAAGCTTGAACCCAATTCCTACAGTGATGAATATAAGCGCAATTGAAATTCCTGGGGAGTTATACATT
TGTGTATTGATAAGACCATTCACTATTTCTTGAAGCTCGATCTCTCCCCCGGA-CGAACCATATAGCCAAGAGAAACCAT
GAACCAGAATAGAAGAGCTTGCCCCACCCATGAGTAAATATTTCATAGTAGCCTCATTAGACCGTACATCTTTCTTGGTA
TATCCAGATAATAGGTAGGAGCATAAACTGAAACATTCTGGAGCTACAAAGATAGTTATTAAATCGTTAGCACCGCATAA
AAACATTCCTCCTAGAGTAGCTGTTAATACGAATAAGAGAAACTCTGTTATAGCCATTTCTGTACATTCAATGTACTCTA
CGGATAGAGGAATACATAGAGTTGAACATAGTAAAATAAGAAATTGAAATATTTCGTTGAAATTGTTCGTTTGGAAATTT
CCCGAAAAGCTAATCATAGGTTCTTCTCTCCATCGGAACAATAGTGCCGTTATACTCATTACTAAACTTGTTGAAGAAAT
GAAATATAACCAAGGTATATCTTTTTGATCAGAAGTTGAATCGATCATCAGAAGAAGAATTAGGCCAAAAATTAGGATAC
ATTCTGGGAAAATAAAACTTCCATCGAAGAGAAGCAAATGAAAGGCTTTCATAAAAATTCTCGTAGAATTGAGAATGAAG
TTTTCATTCTGTACATGCCAGATCATGAATTAGTAACTGCATCCAATCTCCAAAA-AATCCCAATTGTTTCGAACTTTCT
--C--------TTTTTTTTGGAATGGAATATTTACGGAATCCCCATAAAGAGGATCAAACCTTATTCCAAGGTATTTACC
-----TTTTTT------TAT-----TCTTAAGCAAGTCCCCGAGAGGGCTTAATTGATCCATGATTTATCTTTCATCTTT
CATTTCCTTTTCGTTTGTTTCGAGAAATATAGCGATCAATTCCGAT-TCTTTCTTTTTCTATTGATT--------CTTTT
CCGATCGAGATGTATGGCTC-----CATGAGTCTAT------------ATAGATCCTGTTCATGGATTAACGAAAATGCG
CAAAAGCTCTATTTGCCTCTGCCATTCTATGAGTCTCTTCCTTTTTGCGTATGGCATCGCCACTCCCTTTGGCAGCATCC
ACTAATTCGGAACTTAATTTGAAAGCCATATTTCGGCCCGGACGTTTTCGGGATGCCCCTAATAACCAACGAATGGCAAG
TGCTTTTCCTTGTGTGGATCCTATTTCAATGGGAACTTGATGAGTCGATCCGCCTACACGTCTTGCTTTTACTGCTATAT
CGGGAGTTGCTCCACGTATTGCTTGACGTAAAACAGATAGTGGATTTGTTTCTGTCTTTTGTTGAATCTTTTTCATGGCT
CGATAGATAATTTGATAAGCCAATGATTTTTTTCCGTGTTTCAGAATACGGTTAACCAACATGTTAACTAATCGATTACG
ATAAATTGGATCGGATTTTGCAGTTTTTTCTTCTGCAGTACCTCGACGTGACATGAGCGTACAAGGGGTTCT---CAAGA
ATCAGTTTTCCTTTTATAAGGGCTAATAAAATCATTTATTTTGGCTTTTTGACCCCATATTGTAGGGTGGATCTCGAAAG
ATATGAAAGACCTCCCTCCAAGCCGTACATACGACTTTCATCGAATACGGCTTTCCACAGAATTCTATATGTATCTATGA
GATCGAGTATGGAATTCTGTTTACTCACTTTAAATTGAGTATCCGTTTCCCTCCTTTTCCTGCTAGGATTGGAAATCCTG
TATTTTACATATCCATACGATGGAGTCCTTGGGTTTCCGAAATAGTGTAAAAAGAAGTGCTTTGAATCATTGCTATTTGA
CTCGGACCTGCTCTAAAAAAGTCGAGGCATTTCGAATTGTTTGTTGACACGGACAAAGTCAAGGAAAACCTCTGAAATTC
TTCCAATATTGGACCTTGGACATATAAGAGTTCCGAATCGAATCTCTTTAGTAAAGAAGATCT-TTTGTCTCATGGTAGC
CTGCTCCAGTCCCCTTATGAAACTTTCGTTATTGGGTTAGCCGTACACTTTACATGTTTCTAGCAATTCACATGGCATCA
TCAAATGATACAAGTCTTGGATAAGAATCTACAACGCACTAGAACGCCCTTGTTGACGATCCTTTACTCCGACAGCATCT
AGGGTTCCTCGAACAATGTGATATCTCACACCGGGTAAATCCTTAACCCTTCCCCCTCTTACTAAGACTACAGAATGTTC
TTGTAAATTATGGCCAATACCTGGTATATAAGCAGTGATTTCAAATCCCGAGGTTAATCGTACTCTGGCAACTTTACGTA
AGGCAGAGTTTGGTTTTTTGGGGGTAATAGTGGAAAAGTTGACAGATAAGTCACCCTTACTGCCACTCTACAGAACCGTA
CATGAGATTTTCACCTCATACGGCTCCTCGTTCAATTCTTTCAAAGTCATTGGATCCCTTTCCTCGTTCGAGAAGCTCCT
CCCTTCATCCACTCCGTCCCGAAGAGTAACTAGGACAAATTTAGTCACGT------------------------------
-----------------SKAGAAGATTCTTCTTTTTATTTTTACCAAACATATGTGGATCCAATCACGATCTTATAAT--
AAGAACAAGAGATCTTTCTCGATCAATCCCTTTGCCCCTCATTCTTCGAGAATCAGAAAGA--TTTTTTTTTCAAGTTTG
AATTTGTTCATTTGGAATCTGGGCTCTTCTA----CTTCATTTTTATTTATTT-CTTTTTTATTCCCTTCCGTCATTCCT
TAAGTCCCATAGGTTTGATCCTGTAGAATCTGACCCGTTTTCTCATTGAGCGAGGGG-----------------------
-----TACGAAATAAATCTGATTGATTTTTCGATCAAAAGTACTATGTGAAATCTTCGGGTTTTTCCTCTTTCGCTAGCC
CTAT--------C-----CCAT----AG---G--TACAGCTTTTGAATCAATAAAGAACCTTTTCT--------------
---------------------TCTAT------------------------------------------------------
------------------------------------ATCTGTAT--GAATCGATAATTATTACATTC------------C
AATTCTTTCCCGACACCTCCCAAGGAAAATCCCGAATTGG-------ATCCCAAATTGACGGGTTAGTGTGAGCTTATCC
ATGCGGTTATGCACTCTTCGAATAGGAATCCATTTTCTGAAAGATCCTGGCTTTCGTGCTTTGGTGGGTCTCCGAGATCC
TTTCGACGACCTATGTTGTGTTGAAGGGATAT------CTATATGATCCGATCGATTGCGTAAAGCACGCGGTAGCAACG
GAACCGGCGAAAGT--ATAAAGAAAAGACAGTTCTTT-TCTATTCTATC--------------TATTATATTAG------
TATTTTCTATTAGTAATAGATTAGTATTAGTTAGTC-------------------------TTCC--------------G
TGATGAACTGTTGGCACCAGTCCTACATTTTGTCTCTGTGGACCGAGGGGAAAGGGGCTTAGCGAGAAGAGGATTGTACC
ATGAGAGAAGCAAGGAGGTCAACCTCTTTCAACTATACAAGATGGATTCTAGCAATGCAATGTAGTTGGATTCTCATGTC
GATCCAAATGAATCATCCTTTCCACGGAGGTAAATCTTTGCCTGCTAGGCACGAAGATAGCAAGTTACAAATTCTGTCTC
GGTAGGATATATATGTATTT------TATTTCTATTACTATGAAATTCA-----TAAATGAAGTAGTTAATAAATGAACT
AGTTAATGGTGGGGTTACCATTATCCT-----TTTTGTAGTGACGAATCTTGTATGTGTTCCTAATAAMMTAATAAAAGG
AATTTGTCC------TGGGGTCTCAAAGGGGCGTGGAAACACATAAGAACTCTTGAATGA----AAAAGAGATGTAACTC
CAGTTCCTTCGGAAAAAGTAAGATCTTTGGCGCAAGAAGTAAGGGGTTGATCCGTATCATCTTGACTTGGTTCTGATTTC
TCTATTTTTT---TAAGAATACCGAGTTGGGGTCTTCTCCTACCCGTATCGAATAGAACATGCTGAGCCAAATCTTCTTC
ATGTAAAACCTGCTTTATTTAGATCGGGAAAATCATACGTTTTTATGAAACCATGTGCTATGGCTCGAATCCGCAGTCAA
TCCTATTTCCGATAGGAGCAGTTGACAATTGAATCCAATTTTTCCCATTATTTTCGTATCCGTAATGGTGCGAAAAGAAG
GCCCGACTCCAAGTTGTTCAAAAATAGTGGCGTTGAGTTTCTCGACCCTTTGCCTTAGGATTAGTCAGTTCTATTTC---
---TCGATGAGGGCAAGGGAAGGGATATAACTCAGCGGTAGAGTGTCACCTTGACGTGGTGGAAGTCATCAGTTCGAGCC
TGATTATCCCTAAACCCAATGTGAG-TTTTTCTATTTTGATTTGCTCC-CCCGCCGTCGTGA------TCGAATGGATAA
GAGGCTCGTGGGATTGACGTGAGGGGGTAGGGGTGGCTATATTTCTTGGAGCGAACTCTAAGCGAATATGAAGCGCATGG
ATATAAGTTATGC-------CTTGAAATGAAAGACAGTTCCGAATCAGCTTTGTCTACGAATAAGGAAGCTATAAGTAAT
GCAACTAAGAATCTCATGGAGAGTTCGATCCTGGCTCAGGATGAACGCTGGCGGCATGCTTAACACATGCAAGTCGGACG
GGAAGTGGTGTTTCCAGTGGCGGACGGGTGAGTAACGCGTAAGAACCTGCCCTTGGGAGGGGAACAACAGCTGGAAACGG
CTGCTAATACCCCG--TAGGCTGAGGAGCAAAAGGAGGAATCCGCCCGAGGAGGGGCTCGCGTCTGATTAGCTAGTTGGT
GAGGCAATAGCTTACCAAGGCGATGATCAGTAGCTGGTCCGAGAGGATGATCAGCCACACTGGGACTGAGACACGGCCCA
GACTCCTACGGGAGGCAGCAGTGGGGAATTTTCCGCAATGGGCGAAAGCCTGACGGAGCAATGCCGCGTGGAGGTAGAAG
GCCTACGGGTCGTGAACTTCTTTTCCCGGAGAAGAAGCAATGACGGTATCTGGGGAATAAGCATCGGCTAACTCTGTGCC
AGCAGCCGCGGTAATACAGAGGATGCAAGCGTTATCCGGAATGATTGGGCGTAAAGCGTCTGTAGGTGGCTTTTTAAGTC
CGCCGTCAAATCCCAGGGCTCAACCCTGGACAGGCGGTGGAAACTGCCAAGCTGGAGTACGGTAGGGGCAGAGGGAATTT
CCGGTGGAGCGGTGAAATGCGTAGAGATCGGAAAGAACACCAACGGCGAAAGCACTCTGCTGGGCCGACACTGACACTGA
GAGACGAAAGCTAGGGGAGCGAATGGGATTAGATACCCCAGTAGTCCTAGCCGTAAACGATGGATACTGGGCGCTGTGCG
TATCGACCCGTGCAGTGCTGTAGCTAACGCGTTAAGTATCCCGCCTGGGGAGTACGTTCGCAAGAATGAAACTCAAAGGA
ATTGACGGGGGCCCGCACAAGCGGTGGAGCATGTGGTTTAATTCGATGCAAAGCGAAGAACCTTACCAGGGCTTGACATG
CCGCGAATCCTCTTGAAAGAGAGGGGTGCCTTCGGGAACGCGGACACAGGTGGTGCATGGCTGTCGTCAGCTCGTGCCGT
AAG---GTGTTGGGTTAAGTCCCGCAACGAGCGCAACCCTCGTGTTTAGTTGCCACCGTTGAGTTTGGAACCCTGAACAG
ACTGCCGGTGATAAGCCGGAGGAAGGTGAGGATGACGTCAAGTCATCATGCCCCTTATGCCCTGGGCGACACACGTGCTA
CAATGGCCGGGACAAAGGGTCGCGATCCCGCGAGGGTGAGCTAACTCCAAAAACCCGTCCTCAGTTCGGATTGCAGGCTG
CAACTCGCCTGCATGAAGCCGGAATCGCTAGTAATCGCCGGTCAGCCATACGGCGGTGAATTCGTTCCCGGGCCTTGTAC
ACACCGCCCGTCACACTATG-GGAGCTGGCCATGCCCGAAGTCGTTACCTTAACCGCAAGGAGGGGGATGCCGAAGGCAG
GGCTAGTGACTGGAGTGAAGTCGTAACAAGGTAGCCGTACTGGAAGGTGCGGCTGGATCACCTCCTTTTCAGGGAGAGGT
AATGCTTGTTGGGTATTTTGGTTTG----------ACACTGCTTCACACCCAAAAAGAAGGGA-GCTACGTATGA-----
----GTAAAACT---------TGTTGACGGAAGTCTTCTTTCGTTTCTCGACGGTGAAGTAAGACCAAGCTCATGAGCTT
ATTATCCTAGGTCGGAACAAG--TTGATAGGAT--CCC--CCTTTTTTCG-CCCCCATGTCCCTCCCGCGTG-GC-----
-GACATGGGGGCG-----AAAAA-----------AAGGAAAGAGAGGGATGGGGTTTCTCTCGCTTTTGGCATAGCG---
GGCCCCCGGCGAGAGGCCCGCACGACGGGCTATTAGCTCAGTGGTAGAGCGCGCCCCTGATAATTGCGTCGTTGTGCCTG
GGCTGTGAGGGCTCTCAGCCACATGGATAGTTCAATGTGCTCATCAGCGCCTGACCCTGAGATGTGGATCATCCAAGGCA
CATTAGCATGGCGTACTTCTCCTGTTCGAACCGGGGTTTGAAACCAAACTTCTCCTCAGGAGGATAGATGGGGC---GAT
TCGGGTGAGATCCAATGTAGATCCAACTTTCTATTCACTCGTGGGATCCGGGCGGTCC-GGGGGGGACCACCCTGGCTCC
TCTCTTCTCGAGAATCCATACATCCCTTATCAGTGTATGGACAGCTATCTCTCGAGCACAGGTTTAGGTTCGGCCTCAAT
GGGAAAATAAAAAGGAGCACCTAACAACGTATCTTCACAGACCAAGAACTACGAGATCGCCCCTTTCATTCTGGGGCGAC
GGAGGGATCGTACCATTCGAGCC--TTTTTTCTTCAT---------GCTTTT---------CCCGGAGGTCTGGAGAAAG
CTGCAATGAATAGGATTTTCCTAACCCTCCCTTC-------CC---------GAAAGGAAGAACGTGAAATTCTTTTTCC
TTTCCGCAGGGACCAGGAGATTGGATCTAGCCGTAAGAAGAATGCTTGGCTGATAAATAACTCACTTCTTGGTCTTCGAC
CCCCTCAGTCACTACGAACGCCTCCGGCCAGTGCAATGGGATGTGTCTATTTATCTATCTCTTGGCTCGAAATGGGAGCA
GGTTTG------AAAAAGGATCTTAGAGTGTCTAAGGTGGGGCCAGGAGGGTCTCTTAACGCCTTCTTT-TTTCTTCTCA
TCGGAGTTATTTC-AAAAAGACTTGCCATGGTAAGGAAGAA-GGGGGGAACAAGCACACTTGGAGAGCGCAGTACAACGG
AGAGTTGTATGCTGCGTTCGGGAAGGATGAATCGCTCCCGAAAAGGAATCTATTGATTCTCTCCTAATTGGTTGGACCGT
AGGTGCGATGATTTACTTCACGGGCGAGGTCTCTGGTTCAAGTCCAGGATGGCCCAGCTGCGCCAAAGAAA-AGAATAGA
AGAAGCATCTGACTCCTTCATGCATGCTCCACTTGGCTCGGGGGGATATAGCTCAGTTGGTAGAGCTCCGCTCTTGCAAT
TGGG-TCGTTGCGATTACGGGTTGGATATCTAATTGTCCAGGCGGTAATGATAGTATCTTGTACCTGAACCGGTGGCTCA
CTCTTTCTAAGTAATGGGGAAGAGGACCGAAACATGCCACTGAAAGACTCTACTGAGACAAAGATGGGCTGTCAAGAACG
TAGAGGAGGTAGGATGGGCAGTTGGTCAGATCTAGTATGGATCGTACATGGACGATTGTTGGAGTCGGCGGCTCTCCTAG
GGTTCCCTCATCTGGGATCCCTGGGGAAGAGGATCGAGTTGGCCCTTGCGAACAGCTTGATGCGCTATCCCCCTTCAACC
CTTTAGCGAAATGCGGCAAAAGGAAGGAAAATCCATGGACCGACCCCATCGTCTCCACCCCGTAGGAACTACGAGATCAC
CCCAAGGACGCCTTCGGCATCCAGGGGTCGCGGACCGACCATAGAACCCTGTTCAATAAGTGGAAGGCATTAGC-----T
GTCCGCTCTCAGGTTGGGCAGTAAGGGTCGGAGAAGGGCAATCACTCATTCTTAAAACCAGCATTCTTAAGA-CCAAAGA
GTGGGGCGGAAGGGGGGA--------------------------AAGCTCTCCGTTCCTGGTTTTCCTGTAGTTGGATCC
TCCGGAACCACAAGAATTCTTAGTT--------AGAATGGA--------A--------TTCCAA--------CTCAGCAC
CTTTTGAGATTTTGAGAAGAG--------TT-----GCT--------CTTTGG--------AGAG-------CACAGTAC
GATGAAAGTTGTAAGCTGTGTTC------GGGGGGGAGTTATTG-------TTTACCGTTGGCCTCT-------ATGGTA
GAATCAG----TCGGGGGGCCCGAGAGGCGGTGGTTTACCCTGTGGCGGATGTCAGCGGTTCGAGTCCGCTTATCTCCAA
CTCGTGAACTTAGCCGGTACAAAGCTATATGATAGCACCCAATTTTTCCGATTCGGTAGTTCGA-TCTATGATTTATCAT
TCATGGACGTTGATAAGATCCTTCTATTTAGCAGCACCTTAGGATGSCWTAAACTTAAAGTTAAG------GGCGAGGTT
CAAACGAGGAAAGGCTTACGGTGGATACCTAGGCACCCAGAGACGAGGAAGGGCGTAGTAAGCGACGAAATGCTTCGGGG
AGTTGAAAATAAGCGTAGATCCGGAGATTCCCGAATAGGTCAACCTTTCAAACTGCTGCTGAATCCATGGGCAGGCAAGA
GACAACCTGGCGAACTGAAACATCTTAGTAACCAGAGGAAAAGAAAGCAAAAGCGATTCCCGTAGTAGCGGCGAGCGAAA
TGGGAGCAGCCTAAACCGTGAAAACGGGGTTGTGGGAGAGCAA--GACAAGCGTCGTGCTGCTAGGCGAAGCGGTGGAGT
GCTGCACCCTAGATGGCGAGAGTCCAGTAGCCGAAAGCATCATTAGCTTATGCTCTGACCCGAGTAGCATGGGGCACGTG
GAATCCCGTGTGAATCAGCAAGGACCACCTTGCAAGGCTAAATACTCCTGGGTGACCGATAGCGAAGTAGTACCGTGAGG
GAAGGGTGAAAAGAACCCCCATCGGGGAGTGAAATAGAACATGAAACCGTAAGCTCCCAAGCAGTGGGAGGAGCTCGGGG
CTCTGACCGCGTGCCTGTTGAAGAATGAGCCGGCGACTCATAGGCAGTGGCTTGGTTAAGGGAACCCACCGGAGCCGTAG
CGAAAGCGAGTCTTCATAGGGCAATTGTCACTGCTTATGGACCCGAACCTGGGTGATCTATCCATGACCAGGATGAAGCT
TGGGTGAAACTAAGTGGAGGTCCGAACCGACTGATGTTGAAGAATCAGCGGATGAGTTGTGGTTAGGG-GTGAAATGCCA
CTCGAACCCAGAGCTAGCTGGTTCTCCCCGAAATGCGTTGAG-----GCGCAGCAGTTGACTGGACATCTAGGGGTAAAG
TACTGTTTCGGTGCGGGCCGCGAGAGCGGTACCAAATCGAGGCAAACTCTGAATACTAGATATGACCTC-----AAAATA
ACAGGGGTCAAGGTCGGCCAGTGAGACGATGGGGGATAAGCTTCATCGTCGAGAGGGAAACAGCCCGGATCACCAGCTAA
GGCCCCTAAATGACCGCTCAGTGATAAAGGAGGTAGGGGTGCAGAGACAGCCAGGAGGTTTGCCTAGAAGCAGCCACCCT
TGAAAGAGTGCGTAATAGCTCACT-GATCGAGCGCTCTTGCGCCGAAGATGAACGGGGCTAAGCGATCTGCCGAAGCTGT
GGGATGTA---AAAATGCATCGGTAGGGGAGCGTTCCGCCTTAGAGGGAAGCACCCGCGCGAGCAGGGGTGGACGAAGCG
GAAGCGAAAATGTCGGCTTGAGTAACGCAAACATTGGTGAGAATCCAATGCCCCGAAAACCTAAGGGTTCCTCCGCAAGG
TTCGTCCACGGAGGGTGAGTCAGGGCCTAAGATCAGGCCGAAAGGCGTAGTCGATGGACAACAGGTGAATATTCCTGTAC
TACCCCTTGTTGGTCCCGAGGGACGGAGGAGGCTAGGTTAGCCGAAAGATGGTTATCGGTTCAAGGACGCACGGTGTCCC
TGC-TTTTTCAGGGTAAGAAGGGGTAGAGAAAATGCCTCGAGCCGATGTTCGAGTACCAGGCGCTACGGCGTTGAAGTAA
CCCATG----CCATACTCCCAGGAAAAGCTCGAACGACCTTCAACAAAAGGGTACCTGTACCCGAAACCGACACAGGTGG
GTAGGTAGAGAATACCTAGGGGCGCGAGACAACTCTCTCTAAGGAA--CTCGGCAAAATAGCCCCGTAACTTCGGGAGAA
GGGGTGCCTCCTCACAAAGGGGGTCGCAGTGAACAGGCCCGGGCGACTGTTTACCAAAAACACAGGTCTCCG--------
-------------------------------------------------------------CAAAGTCGTAAGACCATGT
ATGGGGGCTGACGCCT----GCCCAGTGCCGGAAGGTCAAGGAAGTTGGTGACCTGATGACAGGGGAGCCGGCGACCGAA
GCCCCGGTGAACGGCGGCCGTAACTATAACGGTCCTAAGGTAGCGAAATTCCTTGTCGGG--------------------
-TAAGTTCCGACCCGCACGAAAGGCGTAACGATCTGGGCACTGTCTCGGAGAGAGGCTCGGTGAAATAGACATGTCTGTG
AAGATGCGGACTACCTGCACCTGGACAGAAAGACCCTATGAAGCTTCACTGTTCCCTGGGATTGGCTTTGGGCCTTTCCT
GCGCAGCTTAGGTGGAAGGCGAAGAAGGCCCCCTTCCGGGGGGGTCCGAGCCATCAGTGAGATACCACTCTGGAAGAGCT
AGAATTCTAACCTTGTGTCAGGACCTACGGGCCAAGGGACAGTCTCAGGTAGACAGTTTCTATGGGGCGTAGGCCTCCCA
AAAGGTAACGGAGGCGTGCAAAGGTTTCCTCGGGCCGGACGGAGATTGGCCCTCGAGTGCAAAGGCAGAAGGGAGCTTGA
CTGCAAGACCCACCCGTCGAGCAGGGACGAAAGTCGGCCTTAGTGATCCGACGGTGCCGAGTGGAAGGGCCGTCGCTCAA
CGGATAAAAGTTACTCTAGGGATAACAGGCTGATCTTCCCCAAGAGCTCACATCGACGGGAAGGTTTGGCACCTCGATGT
CGGCTCTTCGCCACCTGGGGCTGTAGTATGTTCCAAGGGTTGGGCTGTTCGCCCATTAAAGCGGTACGTGAGCTGGGTTC
AGAACGTCGTGAGACAGTTCGGTCCATATCCGGTGTGGGCGTTAGAGCATTGAGAGGACCTTTCCCTAGTACGAGAGGAC
CGGGAAGGACGCACCTCTGGTGTACCAGTTATCGTGCCCACGGTAAACGCTGGGTAGCCAAGTGCGGAGCGGATAACTGC
TGAAAGCATCTAAGTAGTAAGCCCACCCCAAGATGAGTGCTCTCCTATTCCGACTTCCCCAGAGCCTCCGGTAGCACAGC
CGAGACAGCGACGGGTTCTCTGCCCCTGCGAGGATGGAGCGACAGAAGTTTTGAGAATTCAAGAGAAGGTCACGGCGAGA
CGAGCCGTTTATCATTACGATAGGTGTCAAGTGGAAGTGCAGTGATGTATGCAGCTGAGGCATCCTAACAGACCGGTAGA
CTTGAACCTTGTTCCTACATGACCCGATCAATTCGATCAGGTACTCGCCATCTATTTTTATTGTTCAACTC---TTTGAC
AACATGAAAAAACCAAAAGCTCTGCCCTCCCTCTCTATCGATCCAAGG-GATGGAAGGGCGGAGGCCTTTGGTGTCCCCT
CCAGTCAAGAATTGGGGCCTCACAATCACTATCCAATATGTTTTTCTCTCATGCCTTTCTTCGTTCATAGTTCGATATTC
TGGTGTCCTAGGCGTAGAGGAACCACACCAATCCATCC--CGAACTTGGTGGTTAAACTCTACTGCGGCGAAGATACTGT
AGGGGAGGTCCTGCGGAAAAATAGCTCGACGCCAGGATGATAAAAAGCTTAACACCCCTC--ATTCTTATTACTTTTTCA
ATATG------AAAAAAAATGAAA----------AGGTCG-----TCTTATTCAAAACCCCAATTATGAAATCTCTTCTC
TCCCACTTCACACCTCGGAACGCACCGTTCTTATAG-------AGAGAGAGGCGCTTTCGCATCTTATT-----AACCC-
-----GAAATGGCTGGGGAGAGGAAAGGTTCCTTTTTTAGGGTACTCCCAGGAACGGATCCAGTGGAGACAGGGTGGGGC
CTGTAGCTCAGAGGATTAGAGCACGTGGCTACGAACCACGGTGTCGGGGGTTCGAATCCCTCCTCGCCCACAACCGGCCA
AAAAGGGAAGGACCCCTCCCTCTGGAGGTAGGAAAATCATGATCGGGATAGCGGATCCAAGGCTATGGAACTTGGGTGTA
-----------GGTCTTGTGTCAAAATAGAATGGCATCA-------C----------CTTTTCTTCTTTA----------
----------TATAT--------AT--ATATCGTTAATGCTC-------------GAATCCTTCCATATA----------
------GT----------------CGG------------------ACCAA--------------ATCAG-----------
--------------------------------------------------CCTCAGTCTCAGCGAGACTTG---------
GGCAGAATAGCAGA----------GCAAGTATTAG-----TAGCATAGCAAAAATGTGTTCGTCGTCATTAATA----TG
TTTGCTCGCGGTAATTGTGGCCTCTCGGCAGAATCGATGACTGCATCTTTGATGCACTTGCTA------GTACATCTGAA
AATTCTTAATTGGCTAGTTGTAAATAGCCCCAGACTATGGAACAAAGGATTATACCGGACTTACCTACACCGAG-----G
ACGGTGATTCTCAAATATCGCAGAACAGAATGTGATATGATGAGATAGAATGCAATAGAAAGAAAGCCACAGGGAAYSGG
TTACCTAMTCTTAACGGTCAAAGCAAACCTTTTCATTC--------CGAATTAAAGAATTCAG-AATGAATCAAATCTCC
CCAAGTAGGATTCGAACCTACGACCAGTCAGTTAACAGCCGACCGCTCTACCACTGAGCTACTGAGGAACAACGGGAG-A
TTAGATCTCATAGAGTTCAATTCCCGTTCTTAACCCATGACCGATATGAG-CTCGAAGTTTCCTTCGTAACTCCCGAAAC
TTTTTCGTAGTGTCTTCGTTCCATGCCTCATTTCATAGGGAA---------CGCTCTATTGGCTCTATT---------TC
ATTATATTCCATCCATATCCCAATTCCATGCATTTAATATCC-----C----CT-----TTGGTGTCATTGACATAAGAG
ATGTCATTTCTAGTCTATCTGTTTCTATTTCTATATGCTATTTCTATATATATGGAAAGTTTCAAAATCATCATATAATA
ATCCAG-------------------AAATTGCAATAG---AAAAGAAAAAAGGGGGGTTTGTGATATGATTTTGAAATCT
TTTATACTAGGTAATCTAGTATCCTTATGCATGAAGATAATCAATTCGGTCCTTATGGTCGGACTCTATTATGGATTTCT
GACCACATTCTCCATGGGGCCCTCTTATCTCTTCCTTCTCCGAGCTCGGGTTAGAGAAGAAGGAACCGAGAAGAAGGAAC
CGAGAAGAAGGTATCAGCAAC----------AACAGGTTTTATTACGGGACAGCTCGTGATGTTCATATCGATCTATT--
-----------ATGC--------------GCCTCTGCATCT--------------AGCATTG-------------GGTAG
ACCTCATACAATAACTGTCCTA--------------GCTC--------------TACCGTATCTTTTGTTTCATTTCTTC
TGGAACAATCACAAACACTTTTTTGATTATGGATCTACTACCAGAAATTCAATGCGTAATCTTAGCATTCAATGTGTATT
CCTGAATAATCTCATTTTTCAATTATTCAACCATTTCATTTTACCAAGTTCAATGTTAGTCAGAT-TAGTCAATATTTAT
ATGTTTCGATGCAACAACACGATGTTATTTGTAACAAGTAGTTTTGTTGGTTGGTTAATTGGTCACATTTTATTCATGAA
ATGGGTTGGATTGATATTAGTCTGGATACAGCAAAATCATTCTATTAAATC---GAATGTACTTATTCGATCTAATAAGT
ACCTTGTATCAGAATTGATACATTTTATGGCTCGAATCTTTAGTATTCTCTTATTTATTACCTGTGTCTACTCTTTGGGC
AGAATGCCGTCACCCATTTTG------ACTAAGAAACTTAAAGAAACCTC---------------AGAAACGGA------
---AGAAAGGGGGGA--AAGTGA----------GGAAGAAGAAATAGAAAAAACTTCCGAAACAAAAGAGATAGACTATA
AAAATAAACAATT------TTTTGAAATTTTATATG--------------------------------------------
--------------------------------------------AAAAA-AGAAAAAAAGTCTTTTTGGTTTGAAAAACC
TCTTGTAATTAGTCTTTTCGACTACAAACGGTGGAATCGTCCATTTCGATATATAAAAAATGATCAATTTGAAAATATTG
TACGACAGGAAATGGCACAA--TATTTTTTTTATACATGTCAAAGTGATGGAAAAGAAATAATATCTTTTACATATCCAC
AGAGTTTGACAACTTTTTTAGAAATGATACAAAGAAAAATGTCTCTATTTACAACAAAGGAACTCTCCTTTGATG-----
----AATTGTATAGTCATTGGAATGGTAACAATGAAAAAAAAGGGAAAAATTTAACTAAAGAGTTTATAAATAGAGTCGA
AACACTAGATCC--AAAACTTCTTGTTCCTAATACACTAAAAAAAAAGACTAGATTGTGTAATGATGAAACTAAAAAAGC
CTACTTACTTAAAACTTATGATCCCTTATTAAATGGATCTCGTCGAGGAAGAATGAAATTTCGTTTTTCATCATCAATCA
TAAATGAAACTTCGATCAAAAATTACATAGAAAGGATTTG------GATAAATAAAATCCATTTTATCCTTCTGATTATC
AATCATCCAGAATTTGAATCAAAAAAAGATCCGTTTAATGTAAATAGAAAATTATTTTCAACAGAAATCGGTTATTTCTT
GAACTTAATTAATGAATTTGCTAATAAATCAGCATCAAGTTTAAAAATTAAACCACTTTCCTTATTTCCAGATTACAAAG
AAGAAAAAATGTATTCAGAAGATCAAATACAATTTTTAAAATTTTTCTTTGAAGCAGTTATAATCTATCCCAACAATAAC
AACAAAACAAT------TATAAAAAAATCTCCTGAAAT------AAAAGAAATAAAGAAACAAGTGTCTCGTTCATCATA
TAAATTATTGAATGAGTGGGAACAACAAGAGAAAGAAAATGAAGAAAACCCGATAGAGGATCATGAAATTCGTTCACGAA
AAGCTAAACATGTATTAATTTTTACTGACAATCAACAAAACAATGATATTAATAATATTAACA---CGGATAAAACAAAT
TCTGA---TCAAATAGACGAAGTGTCTTTAATACATTATTCACAACAATCCGACTTTCATCGTGATATAATAAAAGGATC
TATCCGAGCGCAAAGACGAAAAATCACTATTTTCGAACTGTTTCAAGCAAATGTGCATTCGCCCTTTTTTTTTGATAGAA
TAGACAAATCCTTTTTATTTTCTTTAG-------ATATTTCAGAGTTAATGAAAATAATATTTTTAAATT----------
-----CGATATGT--------------AAAAACACAGAATTATCAATTTTGAATTATAT---------------AG--AA
AAAACAAAAAAAGAAA-GTGAAAAAAGAGA-CGAA---GACAAAAGAGAGGAAAACAAAAGAGAGGAAAAAGTACGGATG
GAAATTGCTGAAATTTGGGATAGTATTATATTTGCTCAAGCAATAAGAGGTTCTCTTTTAGTAACCCAATCGATTCTTAG
AAAATATATAATCTTACCCTCATTAATAATAGCTAAAAATATAATTCGTATACTTTTTTTTCAATTTCCCGAATGGTTCG
AGGATTTCAGGGATTGGAATAGAGAAATGCATGTTAAATGCACCTATAATGGAGTTCAATTATCAGAAAGAGAATTTCCA
CAAAACTGGTTAACAGACGGTATTCAAATAAAGATCTTATTTCCTTTTCGTCTAAAACCTTGGCATCGATCTAAAAATTS
TTCTAAAAATTCTCATATTC---------------ATAAAGATCGAATGAAAAC-----------------GCAAGATGA
G--------TTTTGTTTTTTAACAGTTTTTGGAATGGAAGTTGAACTCCCTTTCAGCTCCCCCCGAAAGCGACTTTCACT
TCTTAACCCCATATTGACAAAACT-CAAAAAAGAAATTAAAAAGTTGAAAAAGAATTGTTTTCTAGTTATAAAAATTTTA
AAAAAAAGGTTCTTTCTAAATTTTTCAAAAGAAATAAAAAACCAAGTCATCAAAAACATTCTATTTCTAAAAAGAATAAT
AAATAAAATTTCAAACTTACAAAGAAATCTAATTCTATTATTTGGATTTAGAGAAGTATATAGATTGAATGAAACTAAAA
AAGATTCAATAATCAA------------TAATCAAA------------TGATTTT---------TCAA--TTTCCTA---
--------CTCAATTTCAATCT--A----------TGGACTGGACAAA-----TTTTTC---------ATTGACAGAAA-
------AAAAAA-TAAAAGATCTGACTGATACAACAAACACAATACTAAATCAAATCGAAAACATTACAAAAGAAAGGAC
AAAAAGATTTATAACTTCAGAGATCAACATTAATTCTAAGAAAATAAGCGAACATGCTAACAGATTA--AAATTAAAGTC
ATCCGAAAATTTTTC------AAATAT---------ATTGAAAAGAAAAAATA-TTCAATTAGTCCATAAAGCACATTTT
-TTTTTTGTTTTTAGAATTTTGATTGAAAGAATATACATAGATATCTTTCTTGCTATCATTAATATCCCGAGGATTAATG
CTCAATTTTTCCTT-----GAATCAACAAGAAAAATTATTAATAAATACATTTACTATGATGAAGAAA-ATAAAAAAAAA
A-TAGATAAAATAAAAGAAAAAAGAAATGAACATGCAATTCACTTTAT--------------WWAAAGTCACTTATT---
AATAA------TAATAACGGTTTTACTACCAATTCACAGCTTCTCTGTGATGTATCCTCCTTGTCCCAAACATATGTATT
TTACAAATTATCACAAATCCAAGTTCTTAACTTA------------TATAGGTTAAGATCTGTCCTTCAAAATGAAGGAA
TACCC---C-TCTCTATTAAGAATGAAATAAAAGAGTATTTTGCCACCCAAGGGCTATTTCATTCCCAATTAAAAGATAA
AAGTTTTGAAAATCCTA-TAATGAATCAATGGAAAAACTGGTTAAAGAGTCATTACCAATATAAATATGATTTATCTCCA
ATTAGATGGTCGAGATTAATACCACAAAAAAGGCGAAATAAGATCAGTCAAGACCGTATGGT------TCAAAATAAAGA
TCAAAAATTAAACAAAGGTTTTTTTT------ATGAAAAAAACCAATTAATTCATTACGAAAAGCAAAATGATCTTGAAG
CAGATTCATTCGCAGACCAAAAAGAAAATTTTAAAAAACACTATCGATATTATCTTTTATCATATAAATCTATTAATTAT
GAAGAGAAAAAAG--ATT------------CATCTA-------AA----------------------CAAG-----ATTC
CAA-----GTAAATA-ATAAACAAAAGATT--TACAACACAG-AGAAAAGTAAATTACTTGATATCTTGAAAGATATCCC
TATCAATAATTATCTAACAGAAAAAGTTATTGTCGATATAAATAAAAACTTAACTAGAAAATATTTTGATTGGAGAATTT
TATACTTTTGTCCTAGAAATAGGGTCAATATTGACTCTTGGATCAATATCGGAACGAAAAAAAAAAAAAA--TAAGAATA
AAACTAGCTGTA------ATAGGTATCAAATAATTGATA---AAATTGATAAAAA-AGGTCTTGTGTTTTTT-ATGATTC
CCAAATATG-AAAAAAAAGTACTTTCAACCAATCAAA-AG------------TCTTTTGATTGGATAGGAATGAACGAAG
AAATACTAAATCACCCCATAGTTAGATTAGAACTTTGGCTTTTTCAAAAATTTGTAATACTTTACAACACCTACAAGATA
AAACCATGGTCGATACCAATCAAATTACTTCTCTTAAATTCAAATGGAAATGAAACTACTTATAAAAATCACAAAATCAA
CGAAAAGAGTAAGAAAAACGGAAATCCTCTTATATC----TCTATCATCGACCAAAAAACAATCTATTGAATTAGCGAAT
GGAAATCAAGAAAAAAACGAATCTAAGAGTCAAGTGTATCTTGTATCAGTTCTCACAAATCAAGAAAAGGGTATTAAAAA
AACTTATGCGGGATCAGTCATGAAAAAACGTAAAAAGAAAAACCAATTCAAAACTAATATGGAAGCAGAACTCAATTTCT
TCTTACAAAGGTATTTACGTTTTCAATTAAGATGGGATGATTCTTTAAATCAAAAAATAATTAATAATATCAAAGTATAT
TGTCTTCTGCTTAGACTACCCAATCCACGAGAAATAAGTTTCTCCTTTATCGAAAGTAGAGAAATAAGTCTGGATATTCT
AATGACCCAGAAGAATATAACTCTTACACAATTGATGAACCAAGGAATCCTGATTATTGAACCAGTCCGTTTATCAGTAA
AAAATGATGGACAATTTTTTATGTAT-CAAATCATAGGTATTTTGTTGGTTCATAATAGTAACCAACAAATTAATCAAAG
ATATATAGAAAAAAACTAT--ATTGATAAAAAAAATTTTACCGCACCGATTGAAAGAGATCAAAATATAACTGGACATAT
AGAT------------AAAAATCATTATGATTTACTTGTTCTTGAAAAGATTTTCGCTACTAAACATCGTAGAGAATTGA
GAATTTTAATGTTGTTCAATTCAAAAAAGAGAAATGCTATTCATATAAATACAAAAATTTTCAATACTAATAACATAAAA
GACTCTGGTCACATTCTGAAGAAAAGCAAAGATTTTGATAGAGCTAAA-AATAAACTAAATAAATTAAAGCTTTTTCTTT
GGCCCAGTTATCGATTAGAGGATTTAGCTTGTATGAATCGCTATTGGTTTAATACCAATAATGCCAGTCGTTTTAGTATG
TTAAGGATACATATATATC--CACCATTGAAAATATAGTAGGAGTA-CACCTTTCATATATCTCATAACATGTCTGATCT
AGTAT--------AAAAAAACCAAC-----ACATTGTTTAGTTTAGATTCCCTATTCTATTCAGATACATAAAATTCAAT
AGCATATCA-------------ATTGTAT--CTAGAGATCAAAAAT-GTAAG------------T---T-----------
-----------------------------------GGTATGTATCAA-----------TTTTTTTTCTAACCAAATAAA-
---------------------------------------------------------AAAATTTGGATT-------GCTT
AATG---------------ATCGA-----------------TTTTATTTAACAAAA------------------------
--------------------------TTTTGAATTCCTACCAAAAGAAAGATGATTTATTATGTA---------TAACAT
A--------------AGCTAAACTTCC------ATTATTATT---------ATTTATTACAT-TC------TTTTT----
--------ACTGATCAAT---------------ATCTTAAA-----A------TAAGATAAA-ATA----------A-GA
GAAGGGAGC--TTTTTTTATG------GTAAAAAATTCATTTATTTCAATTATTTCACAAAAGCAAAAAGAAGAAAACAC
GGGATCCGTTGAATTTCAAATAAAAAGTTTCACTAATAAGATACGACGACTTACTTCACATTTGGAATTCCATAGAAAAG
ACTATTTATCTCAGAGAGGATTACGGAAAATTCTAGGAAAACGTCAACGACTCTTATCTTATTTGGCCAAACAAAATG--
GAGTGCATTATAAAGAATTAATTAACCTGTTGGGTATTCGGAAGTCAAAAACTCGTTGATTTGAAGAG-----TTA-TTT
TTTGGAATTATTTGATTTATCAGATCTTGAATTTTGATGAATTTC-TTTTCGTTTTCAGT-A------ATTCATAG-AAG
AATGAATAGAGGAAATCCCTATGAATGTACCAGCTACAAAAAAAGACCTTATGATAATTAATATGGGCCCTCACCACCCA
TCAATGCATGGTGTTCTTCGACTCATCGTTACTTTAGACGGCGAAGATGTTATTGACTGCGAACCGATTTTAGGTTATTT
ACACAGAGGAATGGAAAAAATTGCGGAAAACCGAACAATTATACAATATTTGCCTTATGTAACACGTTGGGATTATTTAG
CTACGATGTTCACAGAAGCAATAACAGTAAATGGGCCAGAACTGTTGGGAAATATTCAAGTACCTAAAAGGGGCAGCTAT
ATCCGAATAATTATGTTGGAGTTAAGTCGTATAGCCTCTCATCTCTTATGGCTTGGCCCTTTTATGGCAGATATTGGCGC
ACAGACTCCTTTCTTCTATATTTTTAGAGAAAGAGAATTAATATATGATTTATTCGAAGCTGCAACTGGTATGAGAATGA
TG-CATAATTTTTTTCGTATTGGCGGAGTAGCGGCCGATCTACC--TCATGGCTGGATAGATAAATGTTTAGATTTTTGT
GATT-ATTTTTTAATAGGAGTTACTGAATATCAAAAGCTTATTAGACGAAATCCTATTTTTTTAGAACGAGTTGAGGGAG
TAGGTGTTGTTGGTTCGGAGGAAGCAATAAATTGGGGTTTATCAGGACCCATGCTACGAGCTTCCGGAATACAATGGGAT
CTTCGTAAAGTTGATCATTATGAGTCTTATGACGAATTTGATTGGGAAGTTCAGTGGCAAAAAGAAGGAGATTCATTAGC
TCGTTATTTAGTCCGAATTGGTGAAATGACAGAATCCATAAAAATTCTTCAACAAGCTTTGGAAGGAATTCCTGGAGGAC
CCTATGAAAATTTAGAAACCCGACGTTTTGGTAGAGAAAGGGATCCAG---AATGGAAGGAT-TTTGAATATCGATTCAT
TAGTAAAAAAACTTCTCCTACTTTTGAATTACCGAAACAAGAACTTTATGTAAGAGTCGAAGCCCCAAAGGGGGAGTTGG
GGATTTTTCTTATAGGAGATCAAAGCGGGTTTCCTTGGAGATGGAAAATTCGACCGCCGGGTTTTATCAATTTGCAAATT
CTTCCTCAATTAGTTAAAAGAATGAAATTGGCTGATATTATGACAATACTAGGTAGTATAGATATCATTATGGGAGAAGT
TGATCGTTGAAATGAT------------------AATTGATACAACAAAAGTACAAGTTA------TAGATTCTTTTTCC
AGACTGGAATCATT-AAACAGGGTTTATGGAATTATATGGATGCTTGTTCCTACTTTGACTCTTGTATTTGGAATCACAC
TAGGCATACTCGTACTTGTGTGGTTAGAAAGAGAAATATCTGCAGGACTACAACAACGTATTGGACCTGAATACGCCGGT
CCTGGGGGAGTTCTTCAAGCTCTAGTGGATGGAACAAAACTACTTTTCAAAGAAAATTTTTTTCCCTCTAGAGGGGATAA
TTATTTATTCAGCATCGGACCGTCCATAGCAGTCATATCAACTCTATTAACCTATTCAGTGATTCCTTTTAGTTATCATC
TTGTTTTAGCTAATCTAAATATCGGTGTTTTTTTATGGATTGCTATTTCAAGTATTGCTCCGATTGGGCTTCTTATGTCA
GGATATGGATCAAATAATAAATATTCCTTTTTAGGTGGTCTACGAGCTGCTGCTCAATCGATTAGTTATGAAATACCATT
AACTCTCTGTGTATTATCCATATCTCTACGTGCGATTCGTTAAAACATAAACTTTTCCATA------TTCTTTTTCCTTT
T------------------TTTTAGGAAGAGG-----------TTGATATGAATTGAATAGATTTTTTCATTATTGATTT
ATCATTTTGTTTGATAAAC-------TAAATTAGATAGTTAGATGAGTG----AAAAAAACTGCTGATAAATTTGTAG--
TACAAAATTGAGACTCATTTCCTATGTGCAAGAGGAAACGAAA-----------AATAAACA-----AAAG-AAACGAGA
TTATTTG--------CCCCACC----CAAGATTGGTTATC----------CTGGCTTGAAGCGGGCTC--AAAAGA----
-TCAATCTTATTCC--ATTTTCA-CTACTATTTTTATGTA----------TTAC--CAGAATGGTAATGAGTGATTGA--
----------GCAAAAATGA-GGGATGGTTAGGAACACCAAGATACACA-------------------------------
--------AAGGATTAGTAATA---------------------------------------------GAGATTAT----T
AAAATAGTT-----------------------------------------------------------------------
--------------------------------------------------------------A-----------------
--------------------------------------------------------------------------------
------------------------------------AAAGAATA-TTAATTGGGG-CTTTAGGTTGGTAGAACTGATTAG
GTAGTACTCCCCCAAATTCCGATTTAGAGTATGCTGCCGCCCATCGATTAAAGAAATAACTATCAGGAACGAAAGAATCC
TTTCC------TT-TTTAAGTT----------CAC-------TTTTT----------CTTTT------TTCAT-------
----------AAA-GA--------AGAATAGGAA-----------------AAAA--AA-TGAATCTAAT----------
---TCCATTAC---AATAGAA--------------------------------AAAAAAAGATC-TTTTTTT--------
-------------TTCTTTCTTGCTTATAGTTATATTCATACAGATCAAA-----TTT----------------------
--------------------------------------------------------------------------------
---ACATTAAGTTTTACATTAT------AAGGAGTATCTT------ATTTA---AGGATT---AAAAAAAAGTTATTACT
CAAGAAAGAAAAACGTAAATTCTTAAAGGATAAGATTAATTCAGAAGTGCTTT-TTTAGCATTATAACAAAAAGAATTTT
ATTGGTCGAATTTT--GGTTTTGGAAAGTTCACTAGATTTTGATCCTATCTATCCTACAAATAATAATATAGATCA----
AAATAAATAATATAGATCAAAATAAATAATATGATCTGGT------------------CCTT--AGATTTATT-------
-----------TAACTACTTTAAGGAGCCGTATGAGATGAAAATTTCATGTACGGTTCTGTAATAGCGATGGAAACTGTG
ATGTTATCATCGACTATGATTATCTAACAGTTCAAGTACAGTTGATATAATTGAAGCACAATCAAAATATGGTTTTTGGG
GATGGAATTTGTGGCGTCAACCTATAGGGATTATCC-TTTTTTTGATTTCTTCGCTAGCAGAATGTGAAAGACTACCTTT
TGATTTACCAGAAGCAGAAGAAGAATTGGTGGCAGGGTATCAAACCGAATACTCGGGTATCAAATTTGGTTTATTTTATG
TTGCTTCCTATCTAAACTTATTAGTTTCTTCATTATTTGTAACAGTTCTTTACTTGGGGGGTTGGAATATCTCTATTCCG
TACATA---------------TTTGTTCCTGAATTTTTTAAAATAAATAACGTGGGTAAGTTTTTTGGAACAATGATTGG
TATCTTTATTACATTGGTTAAAACATATTTGTTCGTGTTCATTTCTATCACAACAAGATGGACTTTACCTAGATTAAGAA
TGGACCAATTATTAAATCTTGGATGGAAATATCTTTTACCTATTGCTCTCGGTAATCTATTATTAACAACCTCTTCTGAA
CTCCTTTCATTATAAGTACTCT-----------AAAGAAATATTTT-TCTATATTCACAACTTGGCTG------AAACAA
GAG---------AAAAAACAAAAATCAAACTTTTTATAAATATTCACGATATGCTCCCCATGGTAACTGGGTTCATGAAT
TATAGCCAACAAACCATTCGAGCTGCAAGGTACATCGGTCAAAGTTTTATGATTACCTTATCCCACGCAAATCGTTTACC
GATAACTATTCAATATCCTTATGAAAAATTAATTACATCGGAACGTTTTCGCGGTCGAATTCATTTTGAATTTGATAAAT
GCATTGCTTGTGAAGTATGTGTTCGTGTATGTCCTATAGACCTACCCGTTGTTGATTGGAAAGTCGAAACTGACATTCGA
AAGAAAAGATTGTTTAATTACAGTATTGATTTTGGAATCTGTATATTTTGTGGTAACTGTGTTGAGTATTGTCCAACAAA
TTGTTTATCAATGACTGAAGAATATGAGCTTGCTACTTATGATCGTCACGAATTAAATTATAATCAAATTGCTTTAGGTC
GTTTACCTATCTTAGTAATTGACGATTATACAATTCGAACAGTTTTAAATTTGCATCAAAAAA---AGGGAAATC-CTTT
TTTTGATTAAAGATTTATTAAAAAGTAATTTC--CAATTATTA-----------------------AATGTGGATTAG--
TA-------TTTTTTCAT-------------------------------------TTTACTTGAGCAATAACT------A
CAACAAGTCCGTGTCCGTTCTTGCCAAGAATTGCATCGGGACTTAATTTGTAATAAAAATCTATTAATATTCGAAATTTC
AATTTCGAGTGTCAAATTTTCCTTTTCGAGAAAGA--CTGAAATTAGGCCAATAGTTGTACCTACTGTAAATTATACCCC
TTGG-----AGT-----TTAATTCAATTAGGAACC-AATTAT-AAAAAAGTTTTTACTGGTCGGGTC--AAGACGGTCAT
G----AGAAAAAAATTCGA-TTTTTTTATCTATTATTTTTCGTACAATGGA-TTTGCTTGGGCCAATACATGATTTTCTT
TTAGTCTTTCTGGGTTTAGGTCTTATATTAGGAGGTCTAGGAGTAGTATTACTTACAAATCAAATTTATTCTGCCTTTTC
GTTGGGATTAGTTCTTGTTTGCGTATCTTTATTCTATCTTTTATCAAACTCTCCTTTTGTAGCTGCCGCACAACTCCTTA
TTTATGTGGGAGCTATAAATGTTTTAATTCTATTTGTTGTGATGTTTATGAATGCTCCAGAATATTCAAAAGATTTTAAT
CTTTGGAATGTTGGAGGTGGAATTACTCTGTTAGTTTGTACAAGTCTTTTTGTTTCACTAATTACTATTGTTCTAAATAC
ATCATGGTACGGAATTATTTGGACTACAAGACCAAATCAAATTATAGAGCAAGAATT-GATAAGTAATGGTCAACAAATT
GGAATTCATTTATCAACCGATTTTTTTCTTTCATTTGAATTTATTTCAATAATTCTTTTAGTTGCTTTGATAGGTGCAAT
TGTTGTGGCTCGTCAGTAAGAAA-TCTTTACAATTAAAA-----ATCAAAATC------AAAC---------TTTTGGCT
ATGCTATTACATCCATTTTCCTTTCATTCTTTTTCTTTAATTCTATAT--------------------------------
---TAAARWTTWTTAATKTWATAGA-------------TTTTTT-GTTCTATACT--TGTAATATTGTTATTTTAATCAA
TCCAATCTGGTGATATTGAATTATTGTTCATGGTG-AAATAAATCA-----AAATTTATAAGGAGTTACTCAATGATCCT
TGAGCATCTACTTGTCTTGAGTGCCTATTTATTTTCTATCGGTATCTATGGATTGATCACCAGTCGAAATATGGTTAGAG
CCCTTATGTGTCTTGAACTTATACTGAATGCAGTAAATATAAATTTTGTAACATTTTCTGATTTTTTTGATAGTCGTCAA
TTAAAAGGAAATATTTTCTCAATTTTTGTTATAGCTATTGCAGCTGCTGAAGCAGCTATTGGACTCGCTATTGTTTCGTC
AATTTATCGTAACAGAAAATCAACTCGTATCAATCAATCAAATTTGTTGAA-TAAGTAGTATTCATCAGATAAAATAGAA
TATTCATTAATTCAAATCAGCAGC-----TATAATATGTAAGGTATCTAATCATGTTTAC--AAAAAAATGT-----AAA
AAATAG-AAATATCTTGGTTCTATCTCATTAGTTGATCAACAATTGAGTAATCTATTTTCTAGTAAATCATTGAGTCATC
TAGTACTTT------AAAATATATAATTCAAATTCATTTTAAAAACTTTCTAGATCGAGAA--------TTCA--AATTT
ATGATGTTCAAAAAAAAA-TTCTAGATACAATGTCACATTCAGTAAAGATTTATGATACATGTATAGGGTGTACTCAATG
TGTACGAGCCTGCCCCACCGACGTATTAGAAATGATACCTTGGGACGGATGTAAAGCAAAACAAATAGCTTCTGCCCCAA
GAACAGAAGACTGTGTCGGTTGTAA-GAGATGTGAATCCGCCTGTCCAACGGATTTCTTGAGTGTTCGAGTTTATTTATG
GTATGAAACCACTCGAAGTATGGGTCTAGCTTATTGATACTTTCC--A----AAAAAAACCACTTGAA-TTTATTTGATT
TTTTCTTTACTGACAAAAACCCGTATTCGAAATT-----GTAACAAA-TATAT------TATAT-TTTCGATTACGGGTT
CTTCTGGTCCAAGTGTATCTTGTTTTTACCACGAA---------TTCTTTTCCTTGGTTAACATTATTTGTAGTTTTACC
ACTATCTGCGGGTTCTTTAATTTTTTTTTT-CCCTCATCGAGGAAATAAGCTTATTAGATGGTATACTATATTTATATGT
ATATCCGAACTTCTTTTAATGACCTATGTATTCTCTTTTTATTTCGAATTGGATGATCCATTAATTCAATTAACAGAGGA
TTATAAATGGATAAATTTCTTTGATTTTTACT-GGAGATTGAGAATAGATGGACTTTCTCTAGGGCTGACTTTACTGACA
GGATTTATTACTACTTTAGCTATTTTAGCGGCTCGGCCAGTTACTCGTGATTCCCGATTATTCCATTTTCTGATGTTAGC
AATGTATAGTGCTCAAATAGGTTTATTTTCTTCTCAAGATCTTTTGCTTTTTTTCATCATGTGGGAGTTAGAATTAATTC
CTGTTTATCTACTTCTATCGATATGGGGAGGAAAGAAACGTCTATATTCAGCTACAAAGTTTATTTTGTATACTGCAGGC
AGTTCTGTCTTTTTATTAATGGGAGCTTTAGGTATTGCGTTATATGGTTCCACTGAACCAAG-ATTTAATTTGGAAACCT
CAGCAAATCAATCATATCCTATGCCTTTGGAAATACTATTTTATATTGGATTTCTTATTGCTTTTGCTGTCAAATCACCG
ATTATACCTTTCCATACATGGTTACCTGATACCCATGGGGAAGCACATTATAGTACTTGTATGCTTCTAGCTGGAATCCT
ATTAAAAATGGGAGCGTATGGATTAGTTCGAATCAATATGCAATTATTACCGCACGCTCATTCTAGATTTGCTCCCTGGT
TGATAATAGTAGGCGCAATACAAATAATCTATGCAGCTTCAACATCTCCTGGTCAACGAACCTT-AAAAAAAAGAATAGC
CTATTCTTCTGTATCTCATATGGGTTTTATAATTATAGGAATTTGCTCTCTAAACGATATGGGACTTAATGGAGCCATTT
TACAAATATTATCACATGGGTTTATTGGCGCTGCCCTTTTTTTCTTGGCCGGAACAAGTTATGATAGAATACGTCTCATT
TATCTTGACGAAATGGGTGGAATGGCTAACCCAATGCCAAAAATATTCATGACGTTCAGTATCTTATCACTAGCCTCCCT
TGCATTACCAAGCATGAGCGGTTTTTTTTCGGAATTGATAGTATTTCTTGGAATCATTACTAGTCAAAAATA-TCTTTTA
ATGCAAAAAGTACTAATTACTTTTGGAATGGCAGTTGGAATAATATTAACTCCTATTTATTTATTATCTATGTTACGCCA
AATATTCTATGGATACAAACTTCTTAATGGCACAAATTCTTATTTTTTT----GATTTTGGGCCACGAGAGCTATTTGTT
TTAATTTCTATCCTTTTACCAATAATAGGTATTGGTATTTATCCGGATTTGGTTTTTTCATTGTCAGTCGACAAAGTTGA
AGATATTCTAT-----------------------------CTAATTATTTTTATAGGTAG--------------------
----------T-----------------TTTTATAACTAAAAAAA-----------------------------------
------------------------------AATAATAATAA------AACAAAATATCAAAACA------C------A--
--------------------------------------------------------------------------------
--------------------------------------------------------------------------------
--------------------------------------------------------------------------------
--------------------------------------------------------------------------------
--------------------------------------------------------------------------------
--------------------------------------------------------------------------------
----------------------------------ATCTTCGCCAGACCTTT--------TACTTCAATTCAA-T------
------TAGATGTTAATG-TAAATGAACCATAACTATGTAACCCTACTCCTAATAAATTAACCCCAAAATA-ACATATCC
AAATTATAATAAAGCCGATAGAAGCGACAATTGCGGAATTAAACCCTTCCCGATTTTGCTTTGTTCGAATATGTAAATAA
ATCGCAAATATAGTCCAAGTAATAAATGCCCAAG--TTTCCTTTGGATCCCAATTCCAATATGATCCCCAAGCTTCATTA
GCCCAGACTGCGCCCGAAAGAATACCTATGGTTAAAAAGATAAACCCTATACTAATAATACGGTCACTCCAATGATCTAA
TTGTTGAATCAATTGAA---------ATTTGTAATAATTTCTAGAAAAAAGAAAAGAAGTATGTTTTAAAACGTGCCTTC
TTTCCATCATGTATTGGATTTTACCGAAAGAAAAGGAATCA------TTTACTAAATTATTCCTTTTAGTCAAAATTCTG
ATGAATTTTTGAAATGCAATTACTAAAAGTGCTACTGATAATAAGGATCCACATAAAAGAGCGGCATAGCTCAATACCAT
CATACTTACGTGCATCATTAACCACTGAGATTTAAGAACTGGTACTAAATTTTCGGATTGATACGTGTCGGTTAAAAGAC
CCGAAGTAGCAAAGCCTTGGGCAAAAAAAGTACTTGGGATGATTATTGCACTTAAAAAATTTGTACG------TTTTTTA
AA---------AT------ACGGAACC------ATATAAATAAT---GGAAAAACTCCAGGAAAGAAAGATTAATGATTC
ATATAAGTTACTTAATGGTAAATGTCCCAAATAAATCCAACGAATGGCTAATAATCCTGTTATACAGAAAAATGCAGTTA
TCATGCCCTTTTCTGACGAATCATATAGTCCTACGAATTCGTCGACTAATAAGGTTATTAAATGAATTGTAATTCCAATG
GAAACGACCGAAAAAGATATATGAGCTAATATATGTTCTAAAGTCAAAAATATCATAAAAATTCTTAA------------
--------------------------------------------------------------------------------
-------------------------------------------------------------------CTTGAAATTG---
-AAAAAAAAAATTATGCCGCCACTCGGACTCGAACCGAGATGCTTTAGCACTGCTTCCTAAGAGCAGCGTGTCTACCAAT
TTCACCATAGCGGCTTGCTC------AAAATAATAATAAACTA-TTTTTTTT-TTT-----CAATTGTTGAGCTTGAAAA
GG-----------------------------------------------------ATAAA--------AAATAAATGAGT
TCCATTTA---------------CTATTAAA----------------------------------------------TTA
CATTC-----GTTTTTTATGGTATA-------------------------------------------------------
--------------------------------------------------------------------------------
--------------------------------------------------------------------------------
--------------------------------------------------------------------------------
--------------------------------------------------------------------------------
--------------------------------------------------------------------------------
--------------------------------------------------------------------------------
--------------------------------------------------------------------------------
--------------------------------------------------------------------------------
-------------------------------------------------------------------------------T
GATTTTTC------------------------------------------------------------------------
-------------------------------------------------------------------------------A
ATTAGAAACATAT-------------------------------------------------------------------
------------------------------------------------------AT--TTTAGTAATTGAATCCCCTTTT
TAAC--AAGTTTTAACAAGAAATAAGAAACAA-----T-GAATAATAAACAAG-------A-AAAAATGAATTAG-----
----------TAATAAAA-----CTCATACAA-T-TTT-TTTATGGAACATATACATCAATATTCATGGATCATACCTTT
CTTTACGCTTTCAGTCCCTATATTAATAGGAGGGGGGCTCCTCTTTTTTCCGA-CAGCAACAAAAAAACTTCGTCGTATG
TGGACCTTCCCAAGTGTTTTATTGTTAAGTATAATTATGATTTTTTCGATTGATTTGTCTATTCAGCAAATAAATAGCTC
TTTTATCTATCAATATGTATGGTCTTGGACCATCAATAATGATT----TTTCTTTAGAGTTTGGATACTTAATGGACCCC
CTTACTCTTATTTTGTCAATATTAATTACTACTGTTGGAATTCTGGTTCTTATTTATAGTGACAATTATATGTTTCATGA
TCAAAGCTATTTGAGATTTTTTGCTTATATGAGTTTTTTCAATACTTCAATGTTGGGATTAGTTACTAGTTGTAATTTGA
TACAAATTTATATTTTTTGGGAATTGGTTGGAATGTGTTCTTATCTATTAATAGGTTTTTGGTTCACACGACCTATTGCA
TCGAATGCTTGTCAAAAAGCCTTTGTAACTAATCGTGTAGGGGATTTTGGTTTATTATTAGGAATTTTAGGTCTTTATTG
GATAACGGGTAGTTTTGATTTTCGGGATTTGTTCGAAATATTCAAAAACTTTCTTTTTAACAAT------GAAGTAAATT
TGTTATTTCTTCCTTTATGTGGTTTCCTATTATTTTCTGGTGCAATTGCGAAATCAGCTCAATTTCCTCTTCATGTATGG
TTACCAGATGCCATGGAAGGACCAACTCCTATTTCGGCCTTAATCCATGCTGCTACTATGGTAGCGGCGGGTATTTTTCT
TGTAGCCCGGCTTCTACCCCTTTTCGTACTCATACCTTTTATAATGAATCTAATAGTTTTGATAGGTATAATAACAGTAT
TTTTAGGAGCGACTTTAGCACTTGCTCAAAAAGATATTAAGAGGAGTTTAGCCTATTCTACAATGTCTCAATTGGGTTAT
ACAATGGTAGCTCTAGGTATGGGGTCTTATCGAGCTGCTTTATTTCATTTGATTACGCATGCTTATTCAAAAGCATTATT
ATTTTTAGGATCGGGGTCCATTATTCATTCAATGGAAGCTATTATTGGTTATTCCCCGGGTAAGAGTCAAAATATGATTC
TTATGGGTGGTTTAACAAAACATGTTCCTATTACAAAAATTTCTTTTTTATTAGGAACTCTCTCTCTTTGTGGTATTCCA
CCCCTTGCCTGTTTTTGGTCCAAAGATGAAATTCTTAATGATATTTGGTTCTATTCACCCAGTTTCGCAATAATAGCTTG
GTCCACTGTAGGATTGACAGCCTTTTATATGTTTCGAATCTATTTACTTA-CTTTTGAAGGACATTTCAATCTTTATTTT
CAAAATTACAGTGGTAAACAAAATAGCTCATTTTATGAAATATGTATATGGGGTAAAAAGGT---------ATCAAAAA-
-TAGTAAAAAAACA------A----T-TT------T---GTTTA----GTAAGTATATTAACAATAAATGAGGAAAGGGT
TTCCTTTTTT-CGGAAGAAGACATATCAAATTCAAGGTAATACAAGAAATATAACACATCCTTTTATTATTATTAAACCC
CTCGATAAAAAAAGTACTTTCTCCTATCCTCACGAATCGGATAATACTATGTTATTCCCTATACTTGTTTTAGTACTATT
TACTTTGTTTATTGGAACTATAGGAATTCCTTTCAATCAATTCAATCAGGAAGGGATAGATTTGGCTATATTATCAAAAT
TGTTAACCCCTTCTTTGAA---------TCAAAATAAAAAAAATTTGATAGATGTTTATGAATTTGTAACAAACGCAATT
TTTTCAGTTAATATAACTTATTTGGGAATATTTCTAGCAGCTTCTTTATATAAACCTGTTTATTCATCATTACAAAATTT
TAACTTTCTTAATTCACTTACTAAAGAAGGTCCTAAAAAAATTCTTTGGGACAAATTACTAAATGGCATATATGATTGGT
CCTATAATCGTGCTTACATAGATTATTTTTATGCAATATTTTTTACTAGGAGTATAAGAAAATTAATTCAATTAACTGAG
TTTTTTGATAGACGAATAATTGATGGACTTACTAATGGAATTGGAATTACAAGCTTCTTTGTAGGAGAAAGTATAAAATA
TATTGGAGGAGGTCGTATTTCTTCTTATCTCTTGTTCTATTCATTTTACAAGAC------------------TAATTACA
AGAGGTTTTTCAAACCA--------------------AAAAGACTTTTTTTCT--------------TTTTTTTGCAA--
-------------------------------------------------GCTTAAATT-------------TTCTTGATT
---ATCATATAAAATTTCAAAAAATTGTTTATTTTTATAGTCTA-TCTCTTTTGTTTCGGAAGTTTTTTCTATTTCTACA
TCTGTTTC---------TTCCTCACTTTCC---------------CCCCTTTCT---------TCCGTTTCTGAGGTTTC
TTTAAGTTTC----------TGGGTGACGGCATTCTGCCCAAAGAGTAGACACAGGTAATAAATAAGAGAATACTAAAGA
TTCGAGCCATAAAATGTATCAATTCTGATACAAGGTACTTATTAGATCGAATAAGTACA-----TTCGATTTAATAGAAT
GATTTTGCTGTATCCAGACTAATATCAATCCAACCCATTTCATGAATAAAATGTGACCAATTAACCAACCAACAAAACTA
CTTGTTACAAATAACATCGTGTTGTTGCATCGAAACATATAAATATTGACTAATCTGACTAACATTGAACTTGGTAAAAT
GAAATGGTTGAATAATTGAAAAATGAGATTATTCAGGAATACACATTGAATGCTAAGATTACGCATTGAATTTCTGGTAG
TAGATCCATAATCAAAAAAGTGTTTGTGATTGTTCCAGAAGAAATGAAACAAAAGATACGGTAGAGCTAGGACAGTTATT
GTATGAGGGTTATTGTATGAGGTCTACCCAATG--------------CTAGATGCAGAGG---------CGCATAATAGA
TCGATATGAACATCACGAGCTGTCCCGTAATAAAACCTGTTGTTGCTGATA--------------CCTTCTTCTCGGTTC
CTTCTTCTCTAACC---------CGAGCTCGGAGAAGGAAGAGATAAGAGGGCCCCATGGAGAATGTGGTCAGAAATCCA
TAATAGAGTCCGACCATAAGGACCGA-------ATTGATTATCTTCATGCATAAGGATACTAGATTACCTAGTATAAAAG
ATTTCAAAATCATATCACAAACCCCCCTTTTTTCTTTT---CTATTGCAATTTCTGGATTATTATATG-----------A
TGATTTTGAAACTTTCCATATATATAGAAATAGCATATAGAAATAGAAACAGATAGACTAGAAATGACATCTCTTATGTC
AATGACACC--------AAAGGGGATATTAAATGCATGGAATTGGG-ATAT--GGATGGAATATAATGA---------AA
TAGAGCCAATAG---AGCGTTCCCTATGAAATGAGGCATGGAACGAAGACACTACGAAAAAGTTTCGGGAGTTACGAAGG
AAACTTCGA-GCTCATATCGGTCATGGGTTAAGAACGGGAATTGAACTCTATGAGATCTAAT-CTCCCGTTGTTCCTCAG
TAGCTCAGTGGTAGAGCGGTCGGCTGTTAACTGACTGGTCGTAGGTTCGAATCCTACTTGGGGAGATTTGATTCATT-CT
GAATTCTTT---------AAT-TCGGAATGAAAAGGTTTGCTTTGACCGTTAAGATYCSTTAAG--ATTCCCTGTGGCTT
TCTTTCTATTGCATTCTATCTCATCATATCACATTCTGTTCTGCGATATTTGAGAATCACCGTC-----CTCGGTGTAGG
TAAGTCCGGTATAATCCTTTGTTCCATAGTCTGGGGCTATTTACAACTAGCCAATTAAGAATTTT-CAGATGTACTAGCA
AGTGCATCAAAGATGCAGTCATCGATTCTGCCGAGAGGCCACAATTACCGCGAGCAAACATA-----TTAATGACGACGA
ACACATTTT-----TGCTATGCTACTAATACTTGCT----CTGCTATTCTGCCCAAGTCTCGCTGAGACTGAGGAA----
---GAGTTACGGGGCGTAAAACAAAAAAAA--------TATGCTGATTTGGT----------------CCGA-------C
TATATGGA-------AGGA----------TTCGAGCATT-------AACG------------------------------
-ATATATAT--------------------ATATAAAGAAGAAAAGGTGAGG---------CCATTCTATTTTGACACAAG
ACCTACACCCAAGTTCCATAGCCTTGGATCCGCTATCCCGATCATGATTTTCCTACCTCCAGAGGGAGGGGTCCTTCCCT
-----TTTTGGCCGGTTGTGGGCGAGGAGGGATTCGAACCCCCGACACCGTGGTTCGTAGCCACGTGCTCTAATCCTCTG
AGCTACAGGCCCCACCCTGTCTCCACTGGATCCGTTCCTGGGAGTACCCTAAAAAAGGAACCTTTCCTCTCCCCAGCCAT
TT------CGGGTT-AATAAGATGCGAAAGCGCCTCTCTCTCT-------ATAAGAACGGTGCGTTCCGAGGTGTGAAGT
GGGAGAGAAGAGATTTCATAATTGGGGTTTTG------AATA--AGACGACCTTTTCA-------TTTTTTT-----TCA
TATTGAAAAAGTAATAAGAAT--GAGGGGTGTTAAGCTTTTTATCATCCTGGCGTCGAGCTATTTTTCCGCAGGACCTCC
CCTACAGTATCTTCGCCGCAGTAGAGTTTAACCACCAAGTTCGGGATGGATTGGTGTGGTTCCTCTACGCCTAGGACACC
AGAATATCGAACTATGAACGAAGAAAGGCATGAGAGAAAAACATATTGGATAGTGATTGTGAGGCCCCAATTCTTGACTG
GAGGGGACACCAAAGGCCTCCGCCCTTCCATCCCTTGGATCGATAGAGAGGGAGGGCAGAGCTTTTGGTTTTTTCATGTT
GTC---AAAGAGTTGAACAATAAAAATAGATGGCGAGTACCTGATCGAATTGATCGGGTCATGTAGGAACAAGGTTCAAG
TCTACCGGTCTGTTAGGATGCCTCAGCTGCATACATCACTGCACTTCCACTTGACACCTATCGTAATGATAAACGGCTCG
TCTCGCCGTGACCTTCTCTTGAATTCTCAAAACTTCTGTCGCTCCATCCTCGCAGGGGCAGAGAACCCGTCGCTGTCTCG
GCTGTGCTACCGGAGGCTCTGGGGAAGTCGGAATAGGAGAGCACTCATCTTGGGGTGGGCTTACTACTTAGATGCTTTCA
GCAGTTATCCGCTCCGCACTTGGCTACCCAGCGTTTACCGTGGGCACGATAACTGGTACACCAGAGGTGCGTCCTTCCCG
GTCCTCTCGTACTAGGGAAAGGTCCTCTCAATGCTCTAACGCCCACACCGGATATGGACCGAACTGTCTCACGACGTTCT
GAACCCAGCTCACGTACCGCTTTAATGGGCGAACAGCCCAACCCTTGGAACATACTACAGCCCCAGGTGGCGAAGAGCCG
ACATCGAGGTGCCAAACCTTCCCGTCGATGTGAGCTCTTGGGGAAGATCAGCCTGTTATCCCTAGAGTAACTTTTATCCG
TTGAGCGACGGCCCTTCCACTCGGCACCGTCGGATCACTAAGGCCGACTTTCGTCCCTGCTCGACGGGTGGGTCTTGCAG
TCAAGCTCCCTTCTGCCTTTGCACTCGAGGGCCAATCTCCGTCCGGCCCGAGGAAACCTTTGCACGCCTCCGTTACCTTT
TGGGAGGCCTACGCCCCATAGAAACTGTCTACCTGAGACTGTCCCTTGGCCCGTAGGTCCTGA--CACAAGGTTAGAATT
CTAGCTCTTCCAGAGTGGTATCTCACTGATG---GCTCGGACCCCCCCGGAAGGGGGCCTTCTTCGCCTTCCACCTAAGC
TGCGCAGGAAAGGCCCAAAGCCAATCCCAGGGAACAGTGAAGCTTCATAGGGTCTTTCTGTCCAGGTGCAGGTAGTCCGC
ATCTTCACAGACATGTCTATTTCACCGAGCCTCTCTCCGAGACAGTGCCCAGATCGTTACGCCTTTCGTGCGGGTCGGAA
CTTACCCGACAAGGAATTTCGCTACCTTAGGACCGTTATAGTTACGGCCGCCGTTCACCGGGGCTTCGGTCGCCGGCTCC
CCTGTCATCAGGTCACCAACTTCCTTGACCTTCCGGCACTGGGCAGGCGTCAGCCCCCATACATGGTCTTACGACTTTGC
GGAGACCTGTGTTTTTGGTAAACAGTCGCCCGGGCCTGTTCACTGCGACCCCCTTTGTGAGGAGGCACCCCTTCTCCCGA
AGTTACGGGGCTATTTTGCCGAG--TTCCTTAGAGAGAGTTGTCTCGCGCCCCTAGGTATTCTCTACCTACCCACCTGTG
TCGGTTTCGGGTACAGGTACCCTTTTGTTGAAGGTCGTTCGAGCTTTTCCTGGGAGTATGGCATGGGTTACTTCAACGCC
GTAGCGCCTGGTACTCGAACATCGGCTCGAGGCATTTTCTCTACCCCTTCTTACCCTGAA-AAAGCAGGGACACCGTGCG
TCCTTGAACCGATAACCATCTTTCGGCTAACCTAGCCTCCTCCGTCCCTCGGGACCAACAAGGGGTAGTACAGGAATATT
CACCTGTTGTCCATCGACTACGCCTTTCGGCCTGATCTTAGGCCCTGACTCACCCTCCGTGGACGAACCTTGCGGAGGAA
CCCTTAGGTTTTCGGGGCATTGGATTCTCACCAATGTTTGCGTTACTCAAGCCGACATTTTCGCTTCCGCTTCGTCCACC
CCTGCTCGCGCGGGTGCTTCCCTCTAAGGCGGAACGCTCCCCTACCGATGCATTTTTACATCCCACAGCTTCGGCAGATC
GCTTAGCCCCGTTCATCTTCGGCGCAAGAGCGCTCGATCAG--TGAGCTATTACGCACTCTTTCAAGGGTGGCTGCTTCT
AGGCAAACCTCCTGGCTGTCTCTGCACCCCTACCTCCTTTATCACTGAGCGGTCATTTAGGGGCCTTAGCTGGTGATCCG
GGCTGTTTCCCTCTCGACGATGAAGCTTATCCCCCATCGTCTCACTGGCCGACCTT--GACCCCTG-----TTA--TTTT
GAGGTCATATCTAGTATTCAGAGTTTGCCTCGATTTGGTACCGCTCTCGCGGCCCGCACCGAAACAGTACTTTACCCCTA
GATGTCCAGTCAACTGCTGCGCCTCAACGCATTTCGGGGAGAACCAGCTAGCTCTGGGTTCGAGTGGCATTTCACCCCTA
ACCACAACTCATCCGCTGATTCTTCAACATCAGTCGGTTCGGACCTCCACTTAGTTTCACCCAAGCTTCATCCTGGTCAT
GGATAGATCACCCAGGTTCGGGTCCATAAGCAGTGACAAT-TGCCCTATGAAGACTCGCTTTCGCTACGGCTCCGGTGGG
TTCCCTTAACCAAGCCACTGCCTATGAGTCGCCGGCTCATTCTTCAACAG-GCACGCGGTCAGAGCCCC-----------
-GAGCTCCTCCCACTGCTTGGGAGCTTACGGTTTCATGTTCTATTTCACTCCCCGATGGGGGTTCTTTTCACCCTTCCCT
CACGGTACTACTTCGCTATCGGTCACCCAGGAGTATTTAGCCTTGCAAGGTGGTCCTTGCTGATTCACACGGGATTCCAC
GTGCCCCATGCTACTCGGGTCAGAGCATAAGCTAATGATGCTTTCGGCTACTGGACTCTCGCCATCTAGGGTGCAGCACT
CCACCGCTTCGCCTAGCAGCACGACGCTTGTCTTGCTCTCCCACAACCCCGTTTTCAC--GGTTTAGGCTGCTCCCATTT
CGCTCGCCGCTACTACGGGAATCGCTTTTGCTTTCTTTTCCTCTGG-TTACTAAGATGTTTCAGTTCGCCAGGTTGTCTC
TTGCCTGCCCATGGATTCAGCAGCAGTTTGAAAGGTTGACCTATTCGGGAATCTCCGGATCTACGCTTATTTTCAACTCC
CCGAAGCATTTCGTCGCTTACTACGCCCTTCCTCGTCTCTGGGTGCCTAGGTATCCACCGTAAGCCTTTCCTCGTTTGAA
CCTYRMCTTTAAGTT-----TAAGGCTAT------GCCATCCTAAGGTGCTGCTAAATAGAAGGATCTTATCAACGTCCA
TGAATGATAAATCATAGATCGAACTACCGAATCGGAAAAATTGGGTGCTATCATATAGCTTTGTACCGGCTAAGTTCACG
AGTTGGAGATAAGCGGACTCGAACCGCTGACATCCGCCACAGGGTAAACCACCGCCTCTCGGGCCC-CCCGACTGATTCT
ACCATAGAGGCCAACGGTAAACAATAACTCCCCCCCGAACACAGC----TTACAACTTTCATC--------GTACTGTG-
-------CT--------CTCCAA--------AGA--------GCAAC--------TCT--------TCTCAAAATCTCAA
AAGGTGC--TGAG--------TT-----GGAA--------TTCCATTCTAACTAAGAATTCTTGTGGTTCCGGAGGATCC
AACTACAGGAAAACCAGGAACGGAGAGCTTT----CCCCCCTTCCGCCCCACTCTTT-GGTCTTAAG-------------
---AATGCTGGTTTTAAGAATGAGTGATTGCCCTTCTCCGACCCTTACTGCCCAACCTGAGAGCGGAC-----AGCTAAT
GCCTTCCACTTATTGAACAGGGTTCTATGGTCGGTCCGCGACCCCTGGATGCCGAAGGCGTCCTTGGGGTGATCTCGTAG
TTCCTACGGGGTGGAGACGATGGGGTCGGTCCATGGATTTTCCTTCCTTTTGCCGCATTTCGCTAAAGGGTTGAAGGGGG
ATAGCGCATCAAGCTGTTCGCAAGGGCCAACTCGATCCTCTTCCCCAGGGATCCCAGATGAGGGAACCCTAGGAGAGCCG
CCGACTCCAACAATCGTCCATGTACGATCCATACTAGATCTGACCAACTGCCCATCCTACCTCCTCTACGTTCTTGACAG
CCCATCTTTGTCTCAGTAGAGTCTTTCAGTGGCATGTTTCGGTCCTCTTCCCCATTACTTAGAAAGAGTGAGCCACCGGT
TCAGGTACAAGATACTATCATTACCGCCTGGACAATTAGATATCCAACCCGTAATCGCAACGACCCAATTGCAAGAGCGG
AGCTCTACCAACTGAGCTATATCCCCCCGAGCCAAGTGGAGCATGCATGAAGGAGTCAGATGCTTCTTCTATTCTTTTCT
TTGGCGCAGCTGGGCCATCCTGGACTTGAACCAGAGACCTCGCCCGTGAAGTAAATCATCGCACCTACGGTCCAACCAAT
TAGGAGAGAATCAATAGATTCCTTTTCGGGAGCGATTCATCCTTCCCGAACGCAGCATACAACTCTCCGTTGTACTGCGC
TCTCCAAGTGTGCTTGTT-CCCCCCTTCTTCCTTACCATGGCAAGTC-TTTTTGAAATAACTCCGATGAGAAGAAA-AAA
GAAGGCGTTAAGAGACCCTCCTGGCCCCACCTTAGACACTCTAAGATCC----TTTTTCAAACCTGCTCCCATTTCGAGC
CAAGAGATAGATAAATAGACACATCCCATTGCACTGGCCGGAGGCGTTCGTAGTGACTGAGGGGGTCGAAGACCAAGAAG
TGAGTTATTTATCAGCCAAGCATTCTTCTTACGGCTAGATCCAATCTCCTGGTCCC-------TGCGGAAAGGAAAAAGA
ATTTCACGTTCTTC-------CTTTCGGGAAG---------GGAGGGTTAGGAAAATCCTATTCATTGCAGCTTTCTCCA
----GACCTC--------CGGGAAAAGCATG---------AAGAAAAAAGGCTCGAATGGTACGATCCCTCCGTCGCCCC
AGAATGAAAGGGGCGATCTCGTAGTTCTTGGTCTGTGAAGATACGTTGTTAGGTGCTCCTTTTTATTTTCCCATTGAGGC
CGAACCTAAACCTGTGCTCGAGAGATAGCTGTCCATACACTGATAAGGGATGTATGGATTC--TCGAGAAGAGAGGAGCC
AGGGTGGTCCCCCCCGGACCGCCCGGATCCCACGAGTGAATAGAAAGTTGGATCTACATTGGATCTCACCCGAATCGCCC
CATCTATCCTCCTGAGGAGAAGTTTGGTTTCAAACCCCGGTTCGAACAGGAGAAGTACGCCATGCTAATGTGCCTTGGAT
GATCCACATCTCAGGGTCAGGCGCTGATGAGCACATTGAACTATCCATGTGGCTGAGAGCCCTCACAGCCCAGGCAC--A
ACGACGCAATTATCAGGGGCGCGCTCTACCACTGAGCTAATAGCCCGTCGTGCGGGCCTCTCGCCGGGG---GCCCGCTA
TGCCAAAAGCGAGAGAAACCCCA------TCCCTCTCTTTCCT----TTTTTTCGCCCCCATG-TCGCCACGCGGGAGGG
ACATGGGGGC----GAAAAAAGGGGGATCCTATC--AACTTGTTCCGACCTAGGATAATAAGCTCATGAGCTTGGTCTTA
CTTCACCGTCGAGAAACGAAAGAAGACTTCCGTCA---------ACA---------AGTTTTACTCATACGTAGC-TCCC
TTCTTTTTGGGTGTGAAG----------CAGTGTCAAACCAAAATACCCAACAAGCATTACCTCTCCCTGAAAAGGAGGT
GATCCAGCCGCACCTTCCAGTACGGCTACCTTGTTACGACTTCACTCCAGTCACTAGCCCTGCCTTCGGCATCCCCCTCC
TTGCGGTTAAGGTAACGACTTCGGGCATGGCCAGCTCCCATAGTGTGACGGGCGGTGTGTACAAGGCCCGGGAACGAATT
CACCGCCGTATGGCTGACCGGCGATTACTAGCGATTCCGGCTTCATGCAGGCGAGTTGCAGCCTGCAATCCGAACTGAGG
ACGGGTTTTTGGAGTTAGCTCACCCTCGCGGGATCGCGACCCTTTGTCCCGGCCATTGTAGCACGTGTGTCGCCCAGGGC
ATAAGGGGCATGATGACTTGACGTCATCCTCACCTTCCTCCGGCTTATCACCGGCAGTCTGTTCAGGGTTCCAAACTCAA
CGGTGGCAACTAAACACGAGGGTTGCGCTCGTTGCGGGACTTAACCCAACACCTTACGGCACGAGCTGACGACAGCCATG
CACCACCTGTGTCCGCGTTCCCGAAGGCACCCCTCTCTTTCAAGAGGATTCGCGGCATGTCAAGCCCTGGTAAGGTTCTT
CGCTTTGCATCGAATTAAACCACATGCTCCACCGCTTGTGCGGGCCCCCGTCAATTCCTTTGAGTTTCATTCTTGCGAAC
GTACTCCCCAGGCGGGATACTTAACGCGTTAGCTACAGCACTGCACGGGTCGATACGCACAGCGCCCAGTATCCATCGTT
TACGGCTAGGACTACTGGGGTATCTAATCCCATTCGCTCCCCTAGCTTTCGTCTCTCAGTGTCAGTGTCGGCCCAGCAGA
GTGCTTTCGCCGTTGGTGTTCTTTCCGATCTCTACGCATTTCACCGCTCCACCGGAAATTCCCTCTGCCCCTACCGTACT
CCAGCTTGGCAGTT-TCCACCGCCTGTCCAGGGTTGAGCCCTGGGATTTGACGGCGGACTTAAAAAGCCACCTACAGACG
CTTTACGCCCAATCATTCCGGATAACGCTTGCATCCTCTGTATTACCGCGGCTGCTGGCACAGAGTTAGCCGATGCTTAT
TCCCCAGATACCGTCATTGCTTCTTCTCCGGGAAAAGAAGTTCACGACCCGTAGGCCTTCTACCTCCACGCGGCATTGCT
CCGTCAGGCTTTCGCCCATTGCGGAAAATTCCCCACTGCTGCCTCCCGTAGGAGTCTGGGCCGTGTCTCAGTCCCAGTGT
GGCTGATCATCCTCTCGGACCAGCTACTGATCATCGCCTTGGTAAGCTATTGCCTCACCAACTAGCTAATCAGACGCGAG
CCCCTCCTCGGGCGGATTCCTCCTTTTGCTCCTCA--GCC--TACGGGGTATTAGCAGCCGTTTCCAGCTGTTGTTCCCC
TCCCAAGGGCAGGTTCTTACGCGTTACTCACCCGTCCGCCACTGGAAACACCACTTCCCGTCCGACTTGCATGTGTTAAG
CATGCCGCCAGCGTTCATCCTGAGCCAGGATCGAACTCTCCATGAGATTCTTAGTTGCATTACTTATAGCTTCCTTATTC
GTAGACAAAGCTGATTCGGAACTGTCTTTCA-------TTTCAAGGCATAACTTATATCCATGCGCTTCATATTCGCTTA
GAGTTCGCTCCAAGAAATATAGCCACCCCTACCCCCTCACGTCAATCCCACGAGCCTCTTATC------CATTCGATCAC
GACGGCGGG-GGAGCAA----------------ATCAAAATAGA-AAAACTCACATTGGGTTTAGGGATAATCAGGCTCG
AACTGATGACTTCCACCACGTCAAGGTGACACTCTACCGCTGAGTTATATCCCTTCCCTTGCCCTCATCGAGAAATAGAA
CTGACTAATCCTAAGGCAAAGGGTCGAGAAACTCAACGCCACTATTTTTGAACAACTTGGAGTCGGGCCTTCTTTTCGCA
CCATTACGGATACGAAAATAATGGGAAAAATTGGATTCAATTGTCAACTGCTCCTATCGGAAATAGGATTGACTGCGGAT
TCGAGCCATAGCACATGGTTTCATAAAAACGTATGATTTTCCCGATCTAAATAAAGCAGGTTTTACATGAAGAAGATTTG
GCTCAGCATGTTCTAT-------TCGATACGGGTAGGAGAAGACCCCAACTCGGTATTCTT---AAAAAAATAGAGAAAT
CAGAACCAAGTCAAGATGATACGGATCAACCCCTTACTTCTTGCGCCAAAGATCTTACTTTTTCCGAAGGAACTGGAGTT
ACATCTC------TTTTTCATTCAAGAGTTCTTATGTGTTTCCACGCCCCTTT---------------------------
-----------------------------CTACAAAAAGGATAATGGTAACCCCACCATTAACTAGTTCATTTATTAACT
ACTTCAT-----TTATGAATTTCATAGT------AATAGAAATAAAATACATATATATCCTACCGAGACAGAATTTGTAA
CTTGCTATCTTCGTGCCTAGCAGGCAAAGATTTACCTCCGTGGAAAGGATGATTCATTTGGATCGACATGAGAATCCAAC
TACATTGCATTGCTAGAATCCATCTTGTATAGTTGAAAGAGGTTGACCTCCTTGCTTCTCTCATGGTACAATCCTCTTCT
CGCTAAGCCCCTTTCCCCTCGGTCCACAGAGACAAAATGTAGGACTGGTGCCAACAGTTCATCACGGAAGAAA-----AC
----GGAAGAAAGGACTCACTGAGCCAGGATCGCTAACTAATACTAATCTATTACTAATAGAAA------------ATAC
TAAT-------------ATAATAGATAGAATAGAAAAGAACTGTCTTTTCTTTATACTTTCGCCGGTTCCGTTGCTACCG
CGTGCTTTACGCAATCGATCGGATCATATAGATATCCCTTCAACACAACATAGGTCGTCGAAAGGATCTCGGAGACCCAC
CAAAGCACGAAAGCCAGGATCTTTCAGAAAATGGATTCCTATTCGAAGAGTGCATAACCGCATGGATAAGCTCACACTAA
CCCGTCAATTTGGGATCC-------AATTCGGGATTTTCCTTGGGAGGTGTCGGGAAAGAATTGGAATGTAATAATTATC
GATTCA-----TACAGATATAGAAGAAAAG--------------------------------------------------
------------------------GTTAGGG--CTAGCGAAAGAGGAAAAACCCGAAGATTTCACATAGTACTTTTGATC
GAAAAATCAATCAGATTTATTTCGTACCCCTCGCTCAATGAGAAAACGGGTCAGATTCTACAGGATCAAACCTATGGGAC
TTAAGGAATGACGGAAGGGAAT-AAAAAAGAAATAAATA-------------------AAAATGAAGTAGAAGAGCCCAG
ATTCCAAATGAACAA----------ATTCAAACTTG------------AAAAAAAAATCTTTCTGATTCTCGA-------
AGAATGAGGGGCAAAGGGATTGATCGAGAAAGATCTCTTGTTC--TTATTATAA------GATTGGATCCACATATGTTT
-----------GGTAAAAATAAAAAGAAGAATCTTCTCCTTTGAGAATAATCA--------------------------A
AAAAGGAAAGTGTTCAATTG---------GAACATGAAAACGTGACTAAATTTGTCCTAGTTACT-CTTCGGGACGGAGT
GGATGAAGGGAGGAGCTTCTCGAACGAGGAAAGGGA------TCCAATGACT-------------TTGAAAGAATTGAAC
GAGGAGCCGTATGAG--------GTGAAAATCTCATGTACGGTT-------------------CTG---------TAGAG
TGG-----------------------------------------------------------------------------
---
>10_Blas_gemm_combined
------------------------------------------------------------GAAAAGAACTGTCT------
-------------TTTCTTTATACTTTCG-CCGGTTCCGTTGCTACCGCGTGCTTTACGCAATCGATCGGATCATATAGA
--------------------------------------------------------------------------------
------------------------------------------------CGCATGGATAAGCTCACACTAACCCGTCAATT
-------TGGGATCCAATTCA---------GGATTTTCCTTGGGAGGTGTCGGGAAGGAATTGGAATGTAATAAT-----
------TATCGATTCATACAGATATG------------------------------------------------------
--------------------------------------------------GGA---TA----AGGGC----TAGCGAAAG
AGGAAAAAACCGAAGATTTCACATAGTACTTTTGATCGAAAAATCAATCTGATTTA----------TTTCGTACCCTTC-
-------------------------TACAGGATCAAACCTATGGGACTTAAGGAATGACGGAAGGGAAT-AAAAAAGAAA
TAAATAAAAATGAAGTAGAAGAGCCCAGATTCCAAATGAACAAATTCAAACTGG--------------------------
-----------GCAAAGGGATTGATCGAGAAAGATCT------CTTGTTC--TTATTATAAGATCGTGATTGGATCCACA
TATGTTTGG------T---------------------------------AAAAAGAAGAATCTTCTCCTT----------
------------------------------TGAGAACGTGACTAAATTTGTCCTAGTTACTCTTCGGGACGGAGTGGATG
AAGGGAGGAGCTTCTCG-ACGAGGAAAGGGATCCAATGACTTCGAAAGAATTGAACGARGAGCCGTATGAGGTGAAAATC
TCATGTACGGTTCTGTAGAGTGGCAGTAAGGGTGACTTATCTGTCAACTTTTCCACTATTACCCCCAAAAAACCAAACTC
TGCCTTACGTAAAGTTGCCAGAGTAYGATTAACCTCGGGATTTGAAATCACTGCTTATATACTTAGTATTGGCCATAATT
TACAAGAACATTCTGTAGTSTTAGTAAGAGGGGGAAGGGTTAAGGATTTACCCGGTGTGAGATATCACATTGTTCGAGGA
ACCCTAGATGCTGTCGGAGTAAAGGATCGTCAACAAGGGCGTTCTAGTGCGTTGTAGATTCTTATCCAAGACTTGTATCA
TTTGATGATGC-CATGTGAATCGCTA--GAAACATGTAAAGTGTACGGCTAACCCAATAACGAAAGTTTCGTAAGGGGAC
TGGAGCGGGCTA-CCATGAGACAAAAGAT---------------------------------------------------
-----------------------------------------------------------TGCCTCGACTTTTTTAGAGCA
GGTCCGAGTCAAATAGCAATGAT---------------------------------------------------------
------------------------------------AGGGAAACGGATACTCAATTTAAAGTGAGTAAACAGAATTCCAT
ACTCGATCTCATAGATACATATAGA-------------------------------------------------------
--------------------------------------------------------------------------------
---------------------------TACGCTCATGTCACGTCGAGGTACTGCAGAAGAAAAAACTGCAAAATCCGATC
CAATTTATCGTAATCGATTAGTTAACATGTTGGTTAACCGTATTCTGAAACACGGAAAAAAATCATTGGCTTATCAAATT
ATCTATCGAGCCATGAAAAAGATTCAACAAAAGACAGAAACAAATCCACTATCTGTTTTACGTCAAGCAATACGTGGAGC
AACTCCCGATATAGCAGTAAAAGCAAGACGTGTAGGCGGATCGACTCATCAAGTTCCCATTGAAATAGGATCCACACAAG
GAAAAGCACTTGCCATTCGTTGGTTATTAGGGGCATCCCGAAAACGTCCGGGCCGAAATATGGCTTTCAAATTAAGTTCC
GAATTAGTGGATGCTGCCAAAGGGAGTGGCGATGCCATACGCAAAAAGGAAGAGACTCATAGAATGGCAGAGGCAAATAG
AGCTTTTGCGCATTTTCGTTAATCCATGAACAGGATCTATATAGAC-----TCATGGAGCCATACATCTCGAT-------
-CGGAAAAGAATCAATAGAAAAAGAAAGAATCGGAATTGATCGCTATATTTCTCGAAACAAACGAAAAGGAAACGAAAGA
TGAAACATAAATCATGGATCAATTAAGCCCTCTCGGGGACTTGCTTAAG-----AATAAAAAAAG-GGTAAATACCATGG
AATAAGGTTTGATCCTATTTATGGGGATTCCGTAAATATTCCATTCC--------AAAAAAAAAGAGAAAGTTCGAAACA
ATTGGGATTT----------------------------------------------------------------------
--------------------------------------------------------TTTCAGAATGTATCCTAATTTTTG
GCCTAATTCTTCTTCTGATG-ATCGATTCAACTTCTAATCAAAAAGATATACCTTGGTTATATTTCATCTCTTCAACAAG
TTTARTAATGAGTATAATGGCCCTATTGTTYCGATGGAGAGAAGAACCTATGATTAGCTTTTSGRGAAATTTCCAAACGA
ACAATTTCMACGAAATATTTCAATTTCTTATTTTACTATGTTCAACTCTATGTATTCCT---------------------
---------------------------------------------------------------TTTTTATGCGGTGCTAA
CGATTTAATAACTATCTTTGTAGCTCCAGAATGTTTCAGTTTATGCTCCTACYTATTATCTGGATATACCAAGAAAGATG
TACGGTCTAATGAGGCTACTATGAAATATTTACTCATGGGTGGGGCAAGC------------------------------
--------------------------------------------------------------------------------
-----------------------------------------------------------CTCCTTTTCATCAATGGACTC
CTGACGTATACGAAGGAGTGCGGTTCGTTCGAAAAATTCCTACTTCTCTA------------------------------
--------------------------------------------------------------------------------
--------------------------------------------------------------------------------
-----------------TAATGACGTATACAATATTTAAATTCTCGATG-TAGATGCTACATAGTTGGTTCTCATCCTTC
AGAGACTACGAGTGTAATAGGAGCATCCGTCGACAAAAGGATCACCCTAAGATGATCATCTCATGGCTATTGAGAACGAA
TCAAATCAGATGGTTCTATTTCTCAATCTTTTCGA----------CCTCTT-----GGTTCCGTAG--------GAGCAA
G----------TCAGAAAGATTGAGAAAAATTGGTCATTCACAA--------CCACTGATG----------AAGG-----
-----GTTCCT---------------------------------------------------------------------
--------------------------------------------------------------------------------
--------------------------------------------------------------------------------
---------------------------------------------------TTCCTTTTTATTTCTCATCAAACGAATGG
CATCTTCTTCTGGAAATCCTAGCTATTCTGAGCATGA----GGGGAATCTCATTGCTATTACTCAAACAAGCATGAAACG
TATGCTTGCAT---------------------------------------------------------------------
--------------------------------------------------------------------------------
--------------CATTCGAGATTATGCAGGATTATACACGAAAGATCC-TTTTTTGGCTCTCTCTTTAGCCCTATGTC
TCTTATCCCTAGGAGGTCTTCCTCCACTAGCAGGTTTTTTCGGAAAACTCCATTTATTCTGGTGTGGATGGCAGGCAGGC
CTATAT----------------GACTCCTTACGAGCGTTCTTTCTATCTACTATTATCTAAAAATAATCAAGTTATTAAT
GACTGGACGAAACCAAGAAATAACCCCTCACGTGCGAAATTATAGAAGATCCC--TTAAGATCAAACAAT----------
--------------------------------------------------------------------------------
--------------------------------------CCCTCTTACTAACTGGAATCAAAGAATTAGTAGATCTATTCC
G-CCCAAAATGGAAATAGGCTAGGGTTATGAACTTATAATCTGATAATCGAGTCGATTCTAGGTTTATAAGTTCATTCCA
TACCGGACCAGA------------------CCGGAATAGGCT--TATATACATTCT------------------------
--------------------------------------------------------------------------------
--------------------------------------------------------------------------------
--------------------------------------------------------------------------------
--------------------------------------------------------------------------------
--------------------------------------------------------------------------------
--------------------------------------------------------------------------------
-----ATGTCCGACTCGGGCCT-------ATATG--------ACATGAACGATCAATAGAAATACTCCAACAT-------
-----------GTCATATATTCCATACATCACACTAGATAGATATCATATTCATGGAATACGATTCACTTTCAAGATGCC
TTGGTGGTGAAATGGTAGACACGCGAGACTCAAAATCTCGTGCTAAAGAGCGTGGAGGTTCGAGTCCTCTTCAAGGCATA
ATA-----------------------------------------------------------------------------
--------------------------------------------------------------------------------
--------------------------------------------------------------------------------
----------------------------------------------------AG--------------------------
-----------------------------------------------------------------TATATGCTTCAACAG
GAATTACACAAGAGTAGATTGATACAATAGAAACC---------------------------------------------
--------------------------------------------------------------------------------
---------AGTGACTTTGGCACTGGATGGT-CCC--AAAAAAA---------AATGGGTACTATCCGGGTCGGGTGAAT
TCAATAATAGGCGTCTGTTGGCATTCCATCCTTCCTTCTCCTTTCAGGGACT----------------------------
--------------------------------------------------------------------------------
--------------------------------------------------------------------------------
--------------------------------------------------------------------------------
--------------------------------------------------------------------------------
--------------------------------------------------------------------------------
--------------------------TACCATCCATACATAGTGTTTTGATCTAAGATTTCAATTCTTCCATGTTTCAGC
AGTAACAT-----ATTCTTCCATGTCCAAAATATGGAAGAAAG-------------------------------------
-------CCACTTAATCC-CTATTTCATGGCCACATATCTTTCAGGCTAAGGAATGGGAAACCTTTC-TCCTATT----A
CATGAATCCAATTTCATCCGGGAAAAGCCATCTTTTTCTCAACAATGCCTTTGTCAT-----------------------
----GAACAGATTTGATAAATACTGATAACTCTCGGATAGAGTATTAGAACGGAAAAATCCATTAGATAATGAACTATTG
GTTCTAAGCCATTTCTGGCGATGAATCAACAATTCGAAGTGCTTTTCTTGCGTATT--------------GTTTATATAT
AGATGTAGGAGGATTGGTTTGGGAAGTAAGAAGCCCCTTTGACATCTCTTCATCTGCAAAGAATTCTCGATGTGAAAACA
CAGAGACAAAGGGCGGATCTTTGAATAGGAAAAAGAGTGGATCCGCAGGGTCCCAAATGAATTGGCTTATTCGAAAAAAG
CCTTGTTCTTTGGAAGATCTATCTCCTATCTGGTACTGCATGGTTCCACTCTGCAAGAACTCCGAATCATTCTCTTGAAG
CTCATCC-------------------------------------------------------------------------
--------------------------------------------------------------------------------
--------------------------------------------------------------------------------
--------------------------------------------------------------------------------
--------------------------------------------------------------------------------
--------------------------------------------------------------------------------
-----------------------------------------------------ACTCAAAAGATAAAGAAGTATCGTCAA
TTTCTTCATGCTCGTTCCAAGTTCGAAGTACCATTTGTACAAATAAGAATCCCCTT------------------------
--------------------------------------------------------------------------------
--------------------------------------------------------------------------------
-------------------------------------------TTGGTAAGTGCTACAAGATCTCGTACATTGGAACCCA
TGGTTATGGACCCGAATCCATTAGTA------------------------------------------------------
--------------------------------------------------------------------------------
------------------------------------------------------------------------AGAGATAG
TTCACTAATAGACCAAGGGATAAGTAATTCGACTCATTCACATCCAGATCATGAATGTTTGGAATCCATATTATGCAAGG
AGACATTGCTTTTGCTAATTCGAATTGAAGGGTGATAT------AAAATCGGTCTATTTCCGGCATCATATCTATAG---
--------------------------------------------------------------------------------
--------------------------------------------------------------------------------
-------------------------------------------------------------------GGGGGATAGGGCT
AAGCGGAGCGAAAAGGGTTTTCCATGAGATAGGAAATGAAAACTATTCGCCCCACACGAGGTTTGTGAATAAGTGATTGT
CTGATAATGAGCAAGGAATATCCGTCTTTCGGCTAAACAGGGTGTATTGAACTCATAATTCATTAGATACTTTTTATGAA
TGTCAACTAAGTATCGTAAGTAAATTGCTCCCGGCTCTTCAATCATTTGATAACCAGAGTCATTCTTTGATAAATGATCA
CTATGAGTCAGACTCAATAGAATTTGATCAATCC-TTTTTTCTGTCGTTAAGGTGGAGAACTGAACCAAGAATTCTCTTT
CTTTATCATCAATTGAATCACTGTTCGCGACCAAGGATTCTATTTTATCATCAATCCAATCACCGTTCACGTTTTTTCTT
TTTCTTATCAATGAATAAATCTCTTTACTTGTATGACTTAGATGTCTCGTATTTCTCGAAAAAGTGATTCGATTGATGG-
--------------------------------------------------------------------------------
--------------------------------------------------------------------------------
-----------------TCTTTAACCAGAAAGAATTCAGTTCAGATGTAGGATACCTATCCAGAAGTTTTCGCAACTCAA
TCATGTATGATGGAATCATCAAATATTTTACCTTTTCGAACTCTGTCTGTAACTCACTAGAGG-----------------
--------------------------------------------------------------------------------
---------------------------------------GTGACTCATTATTTCGATGAATCATTTCTTCGGACAGAAGA
AGATTATGTAAACACTTACTCGAAATCTCGCTTATCAGATTCCATTGTGGAAGACACAATTTWTTCTGAAGAATTCGCCA
TGATATATCTAATCCATGCATAATA-------------------------------------------------------
--------------------------------------------------------------------------------
-----------------------------------------------------------CATCTGCCCTTTTTCAACGCA
TTTCTTTAGACAAAGACT--CCGTTTTTTCCTCTTTTCGGATGGTAAATCTT---------TCTCAGAACATGGAGTGTG
AATCAAACCCATGTTTGAATTGAAATTGAGATACTGATG-----------------------------------------
---------------------------------------------TTAGAGGTGTTCCAGAAATGTCTGCGATCGAATAA
ATAGCTCTACGAACGAATGGATCGGATCGAATTGGAAAATGGAAAGATTTGTACAAGTTATACCTTTCGTCACCACTTCG
TGGAAAATCATTAGGTATGAA-----------------------------------------------------------
-----------------------------------GAATATCTTGTTGCGAATGAAC-AAGATATTGAAGAATTGTC-CA
TACGTAAAATCATAATTCT--TGA--------------------------------------------------------
----------------------------------------------ATATCAATGAACTTCTATGAAATGGTTTTACGGG
ATTCAGCCAATTGTCTTGATCGTGGGATATCA---------TTGAGAAATAAGAATCCGTGTT-----------------
--------ATCAAAAGATTTCCTGCGATTATTT------TATGGAATGAGTCAATCATCCACTTTGGTATCTTATTGAAC
AAAAATGGTGATATTGTTCCTCCATTG---------ATCAAAAAT-------------TTCGAT-TTTTGGGAAGTATCA
-----------TGATCATCCAATAAGAA------------------------------------GGGTTTCAATKWAGTT
TGT-------ATTGTATTTGGATGAATATT---------------TTGTTTCACTAATTGTATT--------------T-
-------TGGCTGTGGGACTTGTATCG-----------TATAGCACTTGACTTGGGAGCTTTGGAGC-------------
-------------------------ATAGTC---CAACAATGGTTTCAAGGTCATACTCCAACCTCTTAGATCTTGCATC
TGGTGATATTCCAACATTTAGTCGGGAAAGGAAGAGGCTGCCTCGAGTTGCTACTGTTTCCGGTGTTTTGTCTGAGCTGG
ATGATGAAACCTGCAATAGTGTTGGCTCTGATGCTCCTTCATCGGTATCTCAAGAACGGATTATCATTGTGGGTAACCAA
CTTCCCCTTCGGTCCCATCGTAATCCAGATGGCAGCGGAGAGTGGTGCTTTTTCTGGGA--TGAGGACTCACTTCTTTTA
CAACTTAAAGATGGCCTAGGAGATGATGTTGAAGTCATTTATGTTGGTTGTCTAAAAGAAGAGGTCGACCCTGATGAGCA
GGATGACGTGGCACAAATGTTGCTCGAGACTTTCAAATGTGTTCCTGCATTTATCCCTCCTGACCTCTTCACTAAGTTCT
ATCATGGTTTCTGCAAGCAGTATCTCTGGCCTTTATTTCACTACATGCTTCCTCTATCACCCGATCTTGGTGGCCGCTTT
GACAGGTCCCTTTGGCAGGCATATGTTTCTGTGAACAAAATATTTGCTGACAAAGTAAAGGAAGTGATCAGCCCAGATGA
TGATTACGTG----------------------TGGGTTCATGACTACCATCTCATGGTTTTGCCAACTTTC---------
-------------TTGAGGAAAAG-------G-------------------------TTCAA----TAGGG-----TGAA
---------------A--------------------CTGGGGTT---CTTCCTCCACAGTCCGTTTCCCTCATCCG----
--------------AGATATATCGGACTCTTCCTG-TAAGAGACG-AGC-------------------------------
---------TTCT-------------GAGA-------GCGCTTC------------------TCAAC-------------
---------------TCTGACC-------------------------TTATTGG------CTTTCATACATTTGA-----
----------------------------------------------------------------------------CTAT
GCA----------AGGC------ACTTCCTCTCT-------------TGTT-------GTA---GTCGAATGCT--TGGT
CTTTCTTATCA----------ATCTAAGAGAGGCTA-------------------------------CATAGGGCTCGAG
TATTAT------GGT----------------CGTAC------TGTCAGCATT-------------------------AAG
ATA-----------CTTCCTGTAGGGAT----------------------------------------------------
---------------------------------TCA--------------------------TATAGGGCA------GCT
TCAATCAG---------------TGATGAATCTTCCAGAG---RGTATCAAAG---------------------------
-------------------------ATCCTCATTTTTTCCA-------ACTC-G-------AGCTTACAAATA-------
--AATACAGTAA-------GTCGTCCCT-------------AAACCCGTGTAATTT-ACTA-GTTGATTCAATTTTGGTT
GGGTTAGGTTGGAGC----TTTTTTTTAACCC---TTATGGC----TTTGAC-----------------TCCAAAAA---
------------------------------------------------TAACTT--------------------------
---------------------TTTGATTGCC-------------------------------------------------
--------------------------------------------------------GAAAGGAGGAA-------------
--------AATTCATATGTAATTGACCTACGAAAAGTAA-------------------------------------G---
----TGATTGAATTTATTGAAATGCGC-TTTTTTGTTTCAGCTTTAT---------------------------------
--------------------------GCTCGGCCCTGAATGATTCCTGTCAGCAGAA--TGC-TTTTTGTTTT-------
TCGATA-AATC-AAGC-AACCGCAAGCGGTTAG-TTACAAACAA--------CAAAGAA---------------------
--------------------------------------------------------------------------------
-----------------------------------------------------------------TCGAACTGTTTCAAA
GACCCAACATGCATTTTTTGTTTTTTGCATTGAGCTCTTTCA--------------------------------------
----------------------------------------------------------------------------GTGT
TTCAAAG-AAGGGTTATTCTGACGTAGGTCTGCTTTTGGCTTAGA-----------TCAACCTAAGTTAAATGGA-----
------GTCTCCAT---CA-CCCCGCTTCT---GC-----TTAAAG-AATCAAA-----------TA-------TGAAAC
TTCATACAC---------CTTAAAGTTCATAG------------------------------GGAA------ATCCTTAT
ACTCA----GCCTAGCATTGAATAGACTGGATATTTACCTTATCAA-----TATCTTA-----AATCAATA-A------T
GGGTTCTTTTGAGTGCTG---AAAAGAGCACTTAAATTAAACCGAA-----TCTTTTGTCAGGCTATTGTT---CTCTTG
TTCTCTAAAAGT--------CATGGAGT--------AAGACATCAACTTCTCAATAAGTCTT-------TTAATTATATG
AT----ATACTTCTTTG---------AAAAAAA-----------------------CTCTACCTAACTGAGCTATAGCCC
TTGTA-------TTTGTGATACACATTTTATCATGTCGATAATTTCTTGTCAAGATGA----ATATTACAAGGGCTAACA
TCCTATTTCTT---------------------------------------------------------------------
--------------------------------------------------------------------------------
--------------------------------------------------------------------------------
-----------------AT-------------------------------GA----------------------------
--------------------------------------------------------------TTTCTAGTCAATTGGCAG
-----AAA-AAAATAGGTGTATAAACGAAACCTCTGTTTATACAG-AAGTTATTTTGATTATTCGGACACACCA------
-----ACTAGTT-A---TAGTTACGAAATCAGATTGATAGCCTCTACTCGTGCCTTAGC---------------------
--------------------------------------------------------------------------------
--------------------------------------------------------------------------------
--------------------------------------------------------------------------------
--------------------------------------------------------------------------------
--------------------------------------------------------------------------------
-TCAATGTTACCTACCAAATAAAAGGCCTGTTCGGGAAGACT--------------------------------------
----------------------------------------------------------AAAAGGTTGTGA-TAAGAAACG
CTCAATTTTTCGTGCTYTTGCTACAGTTAAGCG------------------------ATCCAAGGATAGCTATAATGTCC
TGAAGTTCTTTGTAACGTTGTAAAGTTTGCTTAACTCTTTGCGCAGTTTCATAATGTTCCTCA-----------------
--------------------------------------------------------------------------------
--------------------------------------------------------------------------------
----------------------------TTCTTTCTTGTAAAGAACCCATTTCGGTA-CTAAGGGTAGGTTGATAACCAA
CAGCAGAAGGCATTCTACCCAATAAGGCGGATACTTCCGATCCCGCTTGGACGAAACGGAAGATATTGTCGATAAATAGA
AGCACGTCTTGTTCATTAACATCTCGGAAGTATTCCGCCATAGTTAGGGCAGTCAAACCAACTCTCATACGAGCTCCCGG
TGGTTCATTCATCTGACCATAGACTAGAGCCACTTTTGATTCTGCAATATTTTCTTCATTAATTACTCCAGATTCTTTCA
TTTCCATGTAAAGATCATTTCCTTCACGAGTACGTTCTCCTACTCCGCCAAATACGGATACACCCCCGTGGGCTTTCGCT
ATGTTGTTGATTAATTCCATAATTAGTACTGTTTTCCCCACTCCAGCCCCCCCGAATAGT-----------------GCG
ATAAGGGGCTAAAAGATCTACTACTTTAATTCCGGTTTCAAAAATAGATAATTTTGTATCTAACTGTATAAA---GGCAG
GCGCAGATC-----------------------------------------------------------------------
--------------------------------------------------------------------------------
-------AGCACTCATAGCTACAGCGCGAACTCGATTATTTCCTAATAATTGCTGTACTTCACAAGTCACATTAATTTGT
TGACCGGCAGTATCTCGACCCTTAACTACCAGCGCGTTGTAAATATTAGGCATCTTGCCCAG-GGGAAAGG---------
--------------------------------------------------------------------------------
--------------------------------------------------------------------------------
--------------------------------------------------------------------------------
--------------------------------------------------------------------------------
-------------------------------------------------------------CATTTT-------------
--------------------------------------------------------------------------------
--------------------------------------------------------------------------------
--------------------------------------------------------------------------------
--------------------------------------------------------------------------------
-------------------------------------------------------------------------------T
TTATTATTTAGATATTTTGATTAAAA-AAAGTTAAGGATTTAGAAACTTG-AAAAACAAGGGTTGCGTTGCGCCATACAT
ATGAAAGAGTATAAAATAA----------------------------ATCTAATA-------TCTAWY------AACGAA
ATTATGATTAGTTGATA-----A-TA-TTGGTTAATAACTTTGTGAAAGATTCCTGTG-AAAG------G-----GTTCA
TTCACTCCTAATTCATGTCGAGTAGACCTTGTTGCTGTGAGAATTCTTAATTCATGAGTTGTAGGGAGGGACTTATGT--
--------------------------------------------------------------------------------
--------------------------------------------------------------------------------
--------------------------------------------------------------------------------
--------------------------------------------------------------------------------
--------------------------------------------------------------------------------
---------------------CTTATTCTAAAACTTTCCAAGGCCCACCCCATGGTATCCAAGTTGAGAGAGATAAATTG
AACAAGTATGGTCGT-CCCCTATTGGGCTG------------------------------------------TAGAGCTG
TTTATGAATGTCTCCGCGGTGGACTTGATTTTACCAAAGATGATGAGAATGTGAACTCCCAACCGTTTATGCGTTGGAGA
GACCGTTTCCTATTTTGTGCCGAAGCAATTTATAAAGCACAGGCGGAAACGGGTGAAATCAAAGGACATTATTTGAATGC
TACTGCGGGTACATGCGAAGAAATGATGAAAAGGGCTGTATTTGCCAGAGAATTGGGAGTTCCTATAGTAATGCATGACT
ACTTAACAGGAGGATTCACTGCAAATACTAGCTTGGCTCATTATTGCCGAGATAATGGTTTACTTCTTCACATCCACCGC
GCAATG--------------------------------------------------------------------------
--------------------------------------------------------------------------------
--------------------------------------------------------------------------------
-------------------TTCACGTTTGGCATATGCCTGCTCTGACCGAGATCTTTGGAGATGATTCCGTACTACAATT
TGGTGGAGGAACTT-TAGGGCACCCTTGGGGAAATGCAC------------------------------------GTGTA
CAAGCTCGTAATGAGGGACGTGATCTTGCTCGTGAAGGTAATGAAATTATACGCGAGGCTAGCAAATGGAGTCCTGAACT
AGCTGCTGCTTGTGAAGTATGGAAGGAG-----------ATTAAATTTGAATTTGCGG-------------------CAA
TGG-----------------------------------------------------------------------------
--------------------------------------------------------------------------------
--------------------------------------------------------------------------------
--------------------------------------------------------------------------------
--------------------------------------------------------------------------------
---------------------------------------------------------A----------------------
--------------------------------------------------------------------------------
--------------------------------------------------------------------------------
--------------------------------------------------------------------------------
--------------------------------------------------------------------------------
----------------------------------------------T---------------------------------
--------------------------------------------------------------------------------
--------------------------------------------------------------------------------
--------------------------------------------------------------------------------
--------------------------------------------------------------------------------
--------------------------------------------------------------------------------
--------------------------------------------------------------------------------
------------------------------------------------------------------------------A-
----------------------------TTAATAATCTTAGTGTTTGGATCTATATGCTTATTCT---------------
----------GAGAGGA-------------AATATTC-AAATGA---TTTTTTTTTCATCGAATGACTATTCWTC-----
--------TA---TTTATTTTGATATAA-ATAGCG-GCAAGAAAGCTCTATGGAAAAATGGTGGTTCAATTYGATACT-A
TCCAACAGGAAGGTAGAATACAAGTGTAGGCTAAATAAATCAATG-----------------------------------
--------------------------------------------------------------------------------
--------------------------------------------------------GTAATGTTGATCATTTAGTCGGCG
TTAGGGACA-TTCGGAATTTCAGTGCGGATGAAACTTTTTTCGTTAGGGATAGT--------------------------
--------------------------------------------------------------------------------
-----------------------------------TGACGATGAACACTAT------GATCATTATATG------TATGA
TACTAAATATAG--TTGGAATAATTACATCAATAGTTGCATTGACAGTTATCTTGATTCTCAAATCTGTATTGATGGTTC
TATTTTAAGTGCTAGTGACAATTACACCGAAAGTTACAT-----------------------------------------
------------GTCT------AAGAAGAAAAACGAATGGCAGCGATTTAACTAGAAAANGAAAGTTCTAATGATCTCGA
TGTCACTCAAAAATACAGATATTTGTGGATTCAATGCGAAATTTGTTATGCATTAAATTATA-----AAAAATTTTTTAA
GTCAAGAATGAATATTTGTGAACAAT------------------------------------------------------
--------------------------------------------------------------------------------
-------------------------------GATTAACCGAGGCTGTTCAAACAGGCACAGGTCAACTAAACGGAATTCC
--------------------------------------------------------------------------------
-----------------------------------------TGTGCTTCCGGAGGAGCTCGCATGCAAGAGGGAAGTTTG
AGCTTGATGCAAATGGCTAAAATTTCTTCCGCTTTAT-------------------------------------------
-ACATCTCCTACGACTGGTGGGGTGACAGCTAGTTTTGGTATGTTGGGAGATATCATTATTGCTGAACCCAATGCTTACA
TTGCGTTTGCGGGTAAAAGAGTAATTGAACAAACATTAAATAAGACAGTACC----------------------------
--------------------------------------------------------------------------------
---------------------------GA------------------------------------GC-------------
TTAACTTAG------------TTA-ATTCTAAATTKG-----------TTTG-----------GTTTAATTAKAAATTAG
TTAACTAATTT-AATTAT----TTGAGTTC-------------------GGCCGAAC---------------A------A
GTATTTATCGA------AGGAAA---------------------------------------------------------
--------------------------------------------------------------------------------
-----TATT-----------------------------------------------------------------------
--------------------------------------------------------------------------------
--------------------------------------------------------------------------------
----------------------------------TAAA------------------------------------------
-ATCCCTATT-------------------------------GTTCGATCGGATTACAAGGCA-TTTTTCGGAA------A
TTTATGAG--CGGAAGAA---------------------------GTTCTT-----------------------------
--------------------------------------------------------------------------------
--------------------------------------------------------------------------------
--------------------------------------------------------------------------------
--------------------------------------------------------------------------------
--------------------------------------------------------------------------------
--------------------------------------------------------------------------------
-----------------------------------TATGACAATTCTCAACAACTTACCCTCTATTTTTGTGCCTTTAGT
GGGCTTAGTATTTCCGGCAATTGCAATGGCTTCTTTATTTCTTCATGTTCAAAAAAACAAGATTTTGTAGATCCGATGGG
AG------------------------------------------------------------------------------
--------------------------------------------------------------------------------
--------------------------------------------------------------------------------
--------------------------------------------------------------------------------
--------------------------------------------------------------------------------
--------------------------------------------------------------------------------
--------------------------------------------------------------------------------
--------------------------------------------------------------------------------
---------------------------------GATAAAAGTTAC-TTTGGAAACAAAAAAAAAGTAAAA------TTCA
------TTTGGGCTAGTCTCCC----------------------------------------------------------
--------------------------------------------------------------------------------
-ACTTCTAATAA------AATGCAACTGGATCTAGTATGAGTTGGCGATCAGAACGTATATGGATAGAACTTATAGCGGG
ATCTCGAAAAACAAGTAATTTTTTCTGGGCCTTTATACTTTTTTTAGGTTCCTTGGGTTTTTTATTGGTTGGAATTTCCA
GTTA----------------------------------------------------------------------------
---TCGCATTGCCGGTCTATTTATTAGCTCTTATTTGTGGTGCACAATTTCATGGAATGTAGGTAGTGGCTATGATCGAT
TTGATAGAATAGAAGGAATAGTGTGTATTTTTCGTTG-------------------------------------------
--------------------------------------------------------------------------------
--------------------------------------------------------GAAATTGAGCAAAAAGCGGCTGAA
TTGGCC---------------------------------------------------------------TATTTCTTGCG
TGTAC--CAATTGAAGTATTTTGATTAGATAC----AGAT-AGATCATATCTTGTAAATTATCTCC-------------C
CTTTTTTT-GGCA------ATCGACCTTTCTTTTTA--------TCTGTGCTCG--------------------TTGGAC
CATTTCGAA------------GGATAACTTT--TCTGTTTTATTTGG-CTTTTGCCGCTC----A-----TTTTTGATCA
TC---ACAATATTCTTTCAGAAATCTATCTCACTTATTCCTG-----TGGAATATGGGCAATTGG---------------
----------------------------CCTA-------TTTTTTTTTT-------------------------------
--------------------------------------------------------------------------------
--------------------------------------------------------------------------------
-----------------------------------------------------TTTTCGAATTCT---------------
---------------------------------AA-GGACTAGCTT------CATAGG-GTCGAA-GGGTCTGAAGCCTT
GTA-ATAGAACTTATGCTTGATAGAAATATTCGATCATATAGAGTCGACGAATGGGATCGGTTCATTAA----AAATTCA
CAGACAACAAAATG---A-AAAAAAAAACATTTATTCC------------------------------------------
----------TTTAATAAAAGTCTGGAATCTTGGCTTATTAATTGGTGGAATACTAATAAATATGAAACTTTTTT-AAAT
GATATTCAAG----------------------------------------------------------------------
-----------------AAAAGTTT---------CCTATTTCAGTCCACAAAGAAACGATCCAATTGCTCAAGATGCACA
ATGAGCAGCGTATCCATACGATTTTGCACTTCTCGACAAATAGAATCTCTTTCGTTATTCTAAGTGTTTATTCTATTCTA
GGTAATGAAGAACTTATTATTCTTAATTCTTGGGTT--------------------------------------------
--------------------------------------------------------------------------------
-------ATTTGCTCATAATGATCAAATTAT-ATCTGGTCTTGTTTCCACTTTTCCAGTCATTATTGATACCATTTTTAA
ATATTGGATTTTCCGTTATTTAAATCGTGTATCTCCGTCACTAGTAGTGATTT---------------------------
--------------------------------------------------------------------------------
--------------------------------------------------------------------------------
--------------------------------------------------------------------------------
----------TAGCAGCATCGTGGATAGGGAACTATACTAGTAACCTACCTAATTTTATT--------------------
--------------------------------------------------------------------------------
--------------------------------------------------------------------------------
--------------------------------------------------------------------------------
-------------------------------------------------------GTTCTTGCTAATGGCAAAAAAGGAA
CTTTAAATGTAGGAGCTGTCCTTATTTTACCCGAGGGGTTTGAATTAGCCCCTTCCGATCGTATTTCRCCAGAGATGAAA
GAAAAGATAGGTAATCTGTCTTTTCAGACT--------------------------------------------------
--------------------------------------------------------------------------------
--------------------------------------------------------------------------------
---------------------ATTCTACGAAAAGAAAAGGGGGGGTACGAAATAACCATAACAGATCCGTCAGAGGGACG
TCAAGTGATTGATATTATACCTCCAGGACCAGAACTTCTTGTTTCAGAAGGTGAATCCATCAAACTTGATCAACCATTAA
CGAGTAATCCTAATGTGGGTGGATTTGGTCAGGGGGA-------------------------------------------
--------------------------------------------------------------------------------
----------------ATCTACGGATTTATCATCAGCAAGTTCTTAAAAAGAACACA----ATTTTTGTTGGCAATTATG
T-------------------------------------------------------------------------------
------AATTACTTGYATCGCATTTC------TACTCATACTATGGATATTGGT------AAAAAGCCTATTTTACTTTA
---TCCCCTCT-----TTTGGTCTT------TTTTAATCTAAACGGAAACGGTCTGATTCTCTT----------------
------------ACTTTTCTATTCGCATAGAATCAAATT-CGACTAAATACTAA-TTCCTAGTCTTCGACACAAGAAACT
TCTTT-----TCTTGTGTCGAAATAATAATGATTCTTGATCCCATTTGTCAAAGATT-----------------------
--------------------------------------------------------------------------------
--------------------------------------------------------------------------------
--------------------------------------------------------------------------------
--------------AAACTTTT----------------------------------------------------------
------TTGA--GA------------------------------------------------TACTAAAAAAAAAAAT--
AGAGWAAGGTTCTATT---------AGTAT-----------------------------------------------AGA
AAAAT---------------------------------------------------------------------------
--------------------------------------------------------------------------------
--------------------------------------------------------------------------------
---------------------------------------------------------------------------CAACG
GGACCCCTGCCC--TTTTTTCTCTCTTTCTTTTG---------ATTTGAGGGGGTTCGTTGAGCTCTTACGCTTTCATGT
CTACACTGCAGTTTATCCGATTATTACAGGGACGAACCCAATCCGGAATATGAACCATAAAAGAAAATGCCTATTAAACC
AATCACAGGAATACCAGTTACAGTACCTATTATCCAAAGAGGAATCMTTCCAGTAGTATCGGCCATTTCTATCACTTTCC
TCCA-----AAT---TTAATCAAGTGGTCATGCTAGAGACCTGAACAGTCATAGATAATTAT------------------
--------------------------------------------------------------------------------
---------------------------------------------------------------CGATTCAATTCAACATT
TTGTTCATTCGGGTTTGATTGTGTCATAGCTCTATAATTAATTCGAATTAGGTTTATCGTTGGATGAACTGCATTGCTGA
TATTGACCCCAAAAAAGAA-------------------------------------------------------------
-----------------------------GATCTACTAAATTCATCGAGTTGTTCCAAAGGATCAAAACGGCCAGTTATT
AATGGAATTCCTTGTCGGCTCTCTGTAAAATATTCATT------------------------------------------
----------------------------GAAGGTATAGTAATGCTATGAATGACCCAATATCGAATACTGGTAATAATAT
CAGCAAACGAACGTTCTCCTGTGCTTCCAGACATGCTGAGCTCCATATATTCTTGTACAGTCA---AAGGGGGATCCTTT
TTGTAAACGAT---------------------------------------------------------------------
--------------------------------------------------------------------------------
--------------------------------------------------------------------------------
--------------------------------------------------------------------------------
--------------------------------------------------------------------------------
------------------------------------------------------------------------GTAGATCA
-AAAAA-GGCCTTCTTGACATTTGACTACA--------------AACAGGGATTTCCA---------TT--TTYNTT---
--T--NNNNNAATATTCATTTTCTATT---------------------TTATT------TCTCT------AGAATTGTCC
AACGAATCTCTTG-----------ATTCGGAATCACGTGAGGATAGG---------------TGAATGTTTTAGATGATG
AA----------TGGA---TTGCTTTTTCTAC--TT-A--TACCACTCTATTTTT-----GTTAGTGCCATCTATAGTC-
--------TATA-ATATATAATAATTATG--------ATTGA------TAAATAATTGATA--------------AATTA
A----AAACTTTCAATTGAACGTATTCAT---------------------------------------------------
-------------------------------------------------------------AGGTTTATTTAGTTCTTTC
ATGCCTACTATAACTAGTTATTTCGGTTTTCTACTAGTGGCTTTAACTATAACCTCAGTTTTATTTATTGGTCTGAGTAG
GATACGACTTATTT----GAAATGAATTGAATGAACAATTCAT-AAAAAGAGA--TTTTTCTTCAAGATTCCAT------
-----------------------------------------------------------------CAATATGAATTAATA
TTTAAGGATAGATATTACCTC---TCTTTTCCCTTT------AAATAAAAATTGAAATGATTGAAGTTTTTCTATTTGGA
ATCGTCTTAGGTCTAATTCCTATTACTTTGGCTGGATTATTCGTAACTGCATATTTACAATACAGACGTGGTGATCAGTT
GGACTTTTGATTAATTAATTTAATATCGTGC----C--TTTTTTGA----------------------------------
---------------------------------------------------------------------------ATTCA
CGCCCTGTAGGATTTGA----------ACCTACGACATTAGGTTTTGGAGACCTACGTTCTACCGAACTGAACTAAGAGC
GC-T--TTTT-------TTTATGACAAAGAATATAAGACTGTAAGGAAAAAGATTC----T--------TTTTTTAACTC
CAATACATCTTGAATGCCTATATTATCCTAT--TCTTCT------ATAT------TA-----------TGATA-------
------------------TA-----GAATAGGATAAAAAT----GAAAGATTAGGTATGT--CCAGTTT-----TAATTG
ATCTCAATTGA------TCCCACA----TTGTTGCTTAGAGACAAAGTAATAGGTAGGGATGACAGGATTTGAACCCGTG
ACATTTTGTACCCAAAACAAACGCGCTACCAAGCTGCGCTACATCCCTTTCAATTGGTCTACAATGTCATTGTAGAGAAT
CCATAT--------------------TAGTATTT----------------------------------------------
------------------TAATA-CT-----AAACA---TAGG---AAAA------------------------------
------------------AAAGTATAGGCGGAAGCGGAC-TATTTTG-----TTCTTCTTAAG-------AAAAG-----
----------------------------GAAGATCTTATCTATCAAAT-CGTTGTAC----ATTTCTATTTGAATTAGGG
ATTCCTC-CCGCAT---------ACAAAACGA------------------------------------------------
--------------------------------------------------------------------------------
--------------------------------------------------------------------------------
--------------------------------------------------------------------------------
--------------------------------------------------------------------------------
--------------------------------------------------------------------------------
--------------------------------------------------------------------------------
--------------------------------------------------------------------------------
--------------------------------------------------------------------------------
--------------------------------------------------------------------------------
----------------CAGTATCATACAAAATGATTAAATGAAAT-GCTGT-------------CTTGCAATTCTAATCT
AAACTTCTAA-----------------------------------------------------------------T----
--------------------------------------------------------------------------------
--------------------------------------------------------------------------------
--------------------------------------------------------------------------------
----------------TAAGAAATCAACAGGCATTTCCAGATATATTACTCAAAAGAATCGACACAATACGCCTATCCGA
TTGCAATTGAGAAAATTTTGTCCCTATTGTTACAAACATATGATTCACGGGGAAA------------TAAAAAAWTAAGT
GGAA------------CCGACTACC-------------------------------------------------------
--------------------------------------------------------------------------------
--------------------------------------------------------------------------------
--------------------------------------------------------------------------------
--------------------------------------------------------------------------------
------------------------------------------TAGATTGACTT-TAAAACAACAACGATTAATTACTATT
GCTATAAAACAAGCTCGTATTTTATCTTCGTTACCTTTTCTTAGTAATGAAAAACTATTTG-AAAAAAGTGAGTTCGTCG
CTAAAA--------------------------------------------------------------------------
--------------------------------------------------------------------------------
--------------------------------------------------------------------------------
--------------------------------------------------------------------------------
--------------------------------------------------------------------------------
--------------------------------------------------------------------------------
--------------------------------------------------------------------------------
------TAAAGACAATTCCTATTTAATATAGCTATTTGCGCCAGTATTTTACGATTA--------------------TAG
ATTTTTTATTAATCTACTATAACTATAGAATGCCTTATTCTCACGAATTACTGCATTTATCCGAGTAATCCACAAACGA-
------------------------------------GCCGAAAGCAAAGCTCTTATTTTTTGTTGAATAATAGTTCGAGT
AAGTCTTGAATGAGCTCCGCGAAAGCTTGATGCGAATAAACGAATTTTTGTTCTACGCCTTCGAGCTATATATCCT----
--------------------------------------------------------------------------------
---------------------------------------------------------TTCCAAGGGCTTTTGCTACTATA
ACCTTCCCAACCACAA--TT--------TTTTTT-------------------------------------TCTTT-TTT
TTTTCTAGGCGAC---------AATG---CCT---------------------AGAAAAAAAA-----------------
-----------TTGTA---------------TTGA--------T------------ACT--AA--G--------------
-TATTAAAT-----------------------------------------------------------------------
A-------AA----------------------------------------------------------------------
--------------------------------------------------------------------------------
-----------------------------ATTATTAACTTGTACAGTTCACACTCTWTGGCTCTACCCATGAATT-TCTA
GTAATAGGTCTTT----CACAA----------------------------------------------------------
-------------------------------------------------------------------AGATTTTCCATGC
TT-AAGGTATAATCATTTACTA-----CCAATAGGGAATTCTTT--ATCATTTTAAATGAAAAATTGAGGTGATTGAATT
TCCACCAATAGAAAACA--TAAATTTAATACACAATAACAATAGAA-GTATATGATAGATC--TTT----T--TTT----
-ATA--------------GATAGTG-AAGGGG---TTTTTTCTATC-----CTATCCTTC--TGTACTG-----------
-----------------------------------------------------------------------AGTACATGT
TCCTCGCCGCTGAGGACATCCCCCAAGAGCGGGGGATTTGGTGACATTTCTGATTGGCTGTCTTGTGTTTCTAATAAGTT
GTTTAATAGTTGGCATATTGAATTGTA-----------------------------------------------------
-----------A--------------------------------------------------------------------
---------------TA-----------GAAGATT-----------ATTAGAATATTAAATTAAACCCGAGTA-------
--------ATAAAA-TCTCAAATTGTTTGTGCAATTTGCGTGAAATTACTGTTATTTTTTATGAAACTGCTACAAGATCA
ACAATTCCATGAGCTTGGGCTTCTGTTGCTGACATAAAAACATCCCTTTCCATGTCTTCGGATACGACCCACAAGGGTTT
GCCCGTTCTTAGTGCATAAACTCGTGTGAGGATTTCGCGCAGTTTCAGTAGTTCTTCTGCTTC-----------------
----------ATAAAAACCAGCAATAGGTTGATGGATCATTACCCTGATG--AGATAAGATAAT------AAAAGATTAT
TCTATCCCGAATCCTAAGGCGACGAG-AAGAGATAAAGAATAATAA---AAAAAAGCTAGAATTGAAC-----AACCGTA
CAGGCA-----TGCGGATTGCATACGGC-TTCAGACTGGAATTTAC----------------------------------
T-----------------------------TGATCCAATAACCGCCCTTCCCTTGGGAGTAGTT--AAAAAATACTACGG
TGGCTCCGTTGCTTTATTTCATCGGTGATTTAGCAATCT-----------------------------------------
--------------------------------------------------------------------------------
--------------------------------------------------------------------------------
--------------------------------------------------------------------------------
--------CTTTCGATACAGAATCGAATATTAAATTAC--AAAAAATAA----G-AAAAAAATTTCTTATATCGAACTCG
AAATGCCATGCTATTATTACTTAATATTCATTCATATTTCATATGGCGAAGGCATAGTTTT-------------------
--------------------------------------------------------------------------------
--------------------------------------------------------------------------------
--------------------------------------------------------------------------------
---------GTTGATTTGAGATCTC-------------------------------------------------------
------------------------ACCGTACATGCATCTTTTGCTGCATACGGTTCAACAAAAATCGCG-----AAAAAA
ACAATCAATGTGTAGCTTACAGTTCTC-CTGTTTTTGATAGTAAGTACTTTCTAACTTATCT-------TCTAATGAAGA
G------CTTCCAT-------TTTTTTTTTT-------CAAGAAAGAGGGGTTTTGACCTGTTTA---------------
----CCTATATGTTTACC-----------TA--TATAA-------AAATCATTAAATTAAACTTATCAA-----------
ACTAACTTCTCATTGATGTATTCTTT-CATCGAGATCTAATTCAAATCACGATGGCATTTTCTTGTTCG-----------
--------------------------------------------------------------------------------
--------------------------------------------------------------------------------
--------------------------------------------------------------------------------
------------T-------------------------------------------------------------------
--------------------------------------------------------------------------------
--------------------------------------------------------------------------------
-------------------TAACCATAAATTATTCTAATTGWTAATATTAATCTG-------------------------
--------------------------------------------------------------------------------
--------------------CCCAATATATCTCACAAGTCGCACTATACGTCAATCCAAATTGAATCGTCTTCCCCAGGA
TTTCGAAAAGGCACTTTTGGAACACCAATAGGCATTAAATGAAAGCAAAAA-ATAAGTACTATATTTCACTTTGAT--GT
GAAAGCG------------------------------------------------------GTCGTT-------------
--------------------------------------------------------------------------------
--------------------------------------------------------------------------------
--------------------------------------------------------------------------------
-----------CATAGAA-AACGGGGTCAATCCCCCATTGCGTATTGGTGCTTATCGGGTATAGAATAGATCTGCTTCTC
CGT-----GTTTCTACAAACAGAATTGTTACATTTTT----ATTA-AAAGAATAG-----AAAAAAT----AATAATCCT
TTCTCAGAGATAAT------------------------------------------------------------------
--------------------------------------------------------------------------------
--------------------------------------------------------------------------------
--------------------------------------------------------------------------------
----------TACCCTTCATGACTCGTTTAGGAATAACCAATTCATGGGGTGGTTGGAGTATCACAGGAGGAACTATAAC
AAATCCGGGTATTTGGAGTTATGAAGGTGTGGCTGGGGCGCATATTGTCTTTTCGGGCTTGTGC----------------
--CATTGGGTATATTGGGATCTAGAAATCTTTTGTGATGAACGTACAGGAAAACCCTC----------------------
--------------------------------------------------------------------------------
--------------------------------------------------------------------------------
--------------------CTCTCATCATATTGCAGCGGGGACGTTGGGCATATTAGCGGGCCTATTTCATCTTAGTGT
CCGTCCGCCTCAACGTCTATACAA--------------------------------------------------------
--------------------------------------------------------------------------------
---------------------------------------------AGTTGGTGCTGGGCTAGCCGAAAATCAAAGTTTAT
CCGAAGCTTGGTCTAAAATTCCTGAAAAATTGGCTTTTTATGATTACATCGGTAATAATCCGGCAAAAGGCGGATTGTTC
AGAGCAGGGGCAATGGACAACGGGGATGGAATAGCTGTTGGGTGGTTAGGTCAT------------------------CG
TGAACTTTTTGTACGTCGTATGCCTACTTTTTTTGAAACATTTCCAGTTGTTTTGGTAGACGGAGACGGAATTGTTAGGG
CCGATGTTCCTTTTCGAAGGGCAGAATC-GAAGTATAGTGTCGAACAAGTAGGTGTAACTGTTGAGTTTTATGGTGGCGA
ACTTAATGGAGTTAG--ATAGTGACCCTGCTACTGTGAAAAAATATGCCAGACGTGCTCAATTGGGTGAAATTTTTGAAT
TAGATCGTTCTACTTTGAAATCTGATGGTGTTTTTCGTAGTAGTCCAAGGGGTTGGTTTACTTTTGGACATGCTTCATTT
GCTCTTCTCTTCT-TCTTTGGACACATTTGGCATGGTGCTCGTACCTTGTTCAGAGATGTTTTTGCCGGCATTGATCCAG
ATTTAGA-------------------------------------------------------------------------
--------------------------------------------------------------------------------
--------------------------------------------------------------------------------
---------------GCTCCTTTTTTATC-----CGTGGAGCGATCCCTAATAAACAGATATGGAAGTTATAAT------
TGTAAACCACGATCGAATCTATGGAAGCATTGGTTTATACATTCCTCTTAGTCTCGACTCTAGGAATAATTTT-------
--------------------------------------------------------------------------------
--------------------------------------------------------------------------------
--------------------------------------------------------------------------------
--------------------------------------------------------------------------------
-----------------------------------------------------------------TTGAGAGTAGTTCTA
GATCTGGTCCAAGACGAACTATTGTAAAGGAT------------------------------------------------
--------------------------------------------------------------------------------
--------------------------------------------------------------------------------
--------------------CTGAGA--TTTTTTTTAGTCCAT------TCTATTTTGGTAGTTCGATCGTGGAATTTCT
--TTCTTTCTGTATTTTTAGAA----------------------------------------------------------
--------------------------------------------------------------------------------
--------------------------------------------------------------------------------
--------------------------------------------------------------------------------
--------------------------------------------------------------------------------
--------------------------------------------------------------------------------
--------------------------------------------------------------------------------
--------------------------------------------------------------------------------
--------------------------------------------------------------------------------
--------------------GAATATAGAAGATTCAAGAGGCYTGTAAAGATCAACACTAAGAGATCAA-AGAGCTAACT
TGAAATTTTGGCATTATAACCACAAGAAAGAGTTGCCGGATTGGTGT-----TTTTTCGTATCATAATCTTCAGCGAAGA
TTG--TTGAATCATAGAATT---AAGAAG--TTTTTATT---ACACATATCTGTTTCAACTAATATTTTGGTGTTTCTGT
T-------------------------------------------------------------------------------
--------------------------------------------------------------------------------
--------------------------------------------------------------------------------
-----GACCGTTACT--GAGGCTTTTGCTTCTGTTCAATACATAATGACTG---AAGCTAACTTTGGTT-----------
--------------------------------------------------------------------------------
--------------------------------------------------------------------------------
----------------------------GGCAGTCAAAATTGTAACAGGTGTGCCGGAAGCTATTCCTGTAATAG-----
--------------------------------------------------------------------------------
--------------------------------------------------------------------------------
--------------------------------------------------------------------------------
--------------------------------------------------------------------------------
--------------------------------------------------------------------------------
--------------------------------------------------------------------------------
--------------------------------------------------------------------------------
--------------------------------------------------------------------------------
--------------------------------------------------------------------------------
--------------------------------------------------------------------------------
--------------------------------------------------GAAATGCAGCCATTTCCTCTGCATCGACTC
GATTTACGATACTATCGGAGTGAAACAAGGGATCTACAGAATGCCAGAGGCTAAACTATATTAG----------------
--------------------------------------------------------------------------------
-----------------------------------------------------------------T--------------
--------------------------------------------------------------------------------
--------------------------------------------------------------------------------
--------------------------------------------------------------------------------
--------------------------------------------------------------------------AACAAA
AAAACCTGACTTGAATGATCCTGTATTAAGAGCTAAATTGGCTAAAGGAATGGGTCATAATTATTACGGAGAACCCGCAT
GGCCCAACGAT---------------------------------------------------------------------
------------------------------TTTGCAACTCCTTTGGAAATATTACCTGAATGGTATTTCTTTCCCGTATT
TCAAATACTTCGTACAGTACCAAATAAGTTATTGGGTGTTCTTTTAATGATTTCAGTACCTG------------------
--------------------------------------------------------------------------------
--------------------------------------------------------------------------------
-----------------------------------TCTAGGGAATAGTCACTTCAAAGTGAATTCT-CCCTAGATAA---
--AMMNTCTATTCA-ATGTT-------AAAAAAAAGGCGCAAA---------------AAAATCCATTGAATTTAAAATG
GATTCTTTGCTAAAT------CGAAATGCTTTTCTCTTTCTAGAATGTCTAATATATGTTTTACATCGTCTATGCGAAAA
TGTTCAATTTGAATAAGATCTTTTTGGCTCTTATTCAAAAGGTCCAATAATGTATGTATATTGGAC--------------
--------------------------------------------------------------------------------
--------------------------------------------------------------------------------
--------------------------------------------------------------------------------
--------------------------------------------------------------------------------
---------------------------------------------ATGAATACAGCATCTATAGGATAACTTTCATCTTG
AAAATTTTTTGGCG-GTTTTAGACGATAGCCG-------CGACTCCTCTCGATTTGTAATTCAATACGCAAATCAATAGG
TTCGGTTAGCTTAGCTATATACT---------------------------------------------------------
-------GCCTTTGACACAAATAGACGCGTTACGAGTCCCATACAAATTACTTCTCAATACAATTTCTTTTAAA------
-------------------------------------------------------------------------------T
TTGCACATGTGATACATGTTCCTTC--TTTCTCCAAGCAAAGCTCTTCGCATCGCAATGCCTATCGTGTCGGCTTGACCT
TTCATAAGTGGAGACAGAATAAAACGTCCATAATAAAGA-----------------------------------------
--------------------------------------------------------------------------------
--------------------------------------------------------------------------------
--------------------------------------------------------------------------------
--------------------------------------------------------------------------------
-------------------------------------CAGCAAATGGGGTCCCTCTTCTTGTGCCTCTGAWCCCACAAGT
GCCAGCGGAGGAMCAAGAGATTACTCGACCCCGGACATCTGTAACGGTCACAATAGTATTGTTGAAACTTGCTTGAA---
--------------------------------------------------------------------------------
--------------------------------------------------------------------------------
--------------------------------------------------------------------------------
-----------------------GGATTGGAGCAAATTACTATAATTCGCCCCCGTCTCCGTATCAGTCGACATTTTTCA
CAAATTTTACGAACAGAAGCC--------CTTACCATT------------------------------------------
---------------------------------------------T----------------------------------
-----TGAC-----------------------------------------------------------------------
--------------------------------------------------------------------------------
--------------------------------------------------------------------------------
--------------------------------------------------------------------------------
-----------------------------------------------------------------------GGTAATATA
TGTAGAAAAC------CACGTCGGGTCTTTCCTTTCCCGAAACATAACCTAAAAATGGGTCTTTATTATC-TAAATGAAT
T-TGGGAACATACCATTAAAAAGTGATT---------CAGTAATTTAACCTTCCCGAATCC----TCT------------
--------TTTGT-------------------------------------------------------------------
--------------------------------------------------------------------------------
--------------------------------------------------------------------------------
--------------------------------------------------------------------------------
----------------------------------------------------GTCGACTGATCC-GTTTTAAATTTAGAC
TTGTTTTATATGGTCTTTTTCTATTCCTTCTATGCCGTAGAGTTAAAACCAAAAAATTTTTGTTGCCTTCCCGGTG----
--------------------------------------------------------------------------------
--------------------------------------------------------------------------------
--------------------------------------------------------------------------------
----------------TT----------------------------------------------------------TAC-
--------------------------------------------ACAATCT------ATTA-ATTAATTTGAATTCAATC
CA-GTTTATTC------AAATATTATA----ACTATATCACAGT---------CTCATCTTAAATGTTA-----------
--------------------------------------------------------------------------------
--------------------------------------------------------------------------------
-------------------------------------------------ACCGTTGTCGCGTTTGAGTTCTTTACAGGTA
CGTACAATTACAGCTCTGACCACTTCGGATCTTTCTAGAGGTGAATTTGGTACTGCTTCTTTGATCACAGCAACAATAAC
GTCACCGATATGAGCATATCGGCGATTACTAGTCCCCAGGATTCGAATG-------------------------------
--------------------------------------------------------------------------------
--------------------------------------------------------------------------------
--------------------------------------------------------------------------------
---------------------------------------------TGAGT-TCGTATAGGCATTTTTGACGCTGCTATTG
AAATAGCCTTTCTGGCTATACTTTCTGCTACTCCGCTCATTTCATAAAGTATTCTTCCTGGTTTAACAACAGCTACCCAA
TATTCGGGAGATCCTTTC-----------------------------TACGGTAWCAGGTTTGTCGGGAAAAATACGTAC
CCATATTTTTCCACCGCGGCGCGCATTTCGTGTCATTGCCCGACGCCCTGCTTCTATTTGTCGAGATGTAATCCAAGCGG
GTTCA-------------------------------------------------ATATTCCTTTCATCCTTCCTCTATGT
TGTTTACGAAATCTGGTTCTTTTGGGGTTATAGTTGATGGTTGTTTCTCAATTCCATCTCTACTACAAAACCGGACATGA
GAGTTTCTTCTCATCCAGCTCCTCGCGAATGAAATTAT----------ATAT----------------------------
--------------------------------------------------------------------------------
--------------------------------------------------------------------------------
--------------------------------------------------------------------------------
--------------------------------------------------------------------------------
--------------------------------------------------------------------------------
--------------------------------------------------------------------------------
--------------------------------------------------------------------------------
-----------------------------------------------------------------AT-------------
--------------------------------------------------------------------------------
--------------------------------------------------------------------------------
--------------------------------------------------------------------------------
--------------------------------------------------------------------------------
--------------------------------------------------------------------------------
--------------------------------------------------------------------------------
--------------------------------------------------------------------------------
--------------C-----------------------------------------------------------------
--------------A-------TA--------------------------------------------------------
---------------------------------------------TCTTTCTTG--------------------------
C-------------------------TT----------------------------------------------------
-------C------------------------------------------------------------------------
--------------------------------------------------------------------------------
--------------------------------------------------------------------------------
------------------------------------------------------------------T----TTTATTTGG
ATCTA-AATAATGTGAAGCGATGAGTTGGTTATTCGTTCTATACTTAGTTAGTTCATAA-TTAGGGGTCAGTCCA----T
TTGT-----TTTTAATCCTT------------------------------------------------------------
--------------------------------------------------------------------------------
--------------------------------------------------------------------------------
--------------------------------------------------------------------------------
--------------------------------------------------------------------------------
--------------------------------------------------------------------------------
--------------------------------------------------------------------------------
--------------------------------------------------------------------------------
--------------------------------------------------------------------------------
------------------------------------AA-----------TAGCTTTTTTCATTGCTTTGCGAAAGGGGAC
TCTATT--------------------------------------------------------------------------
----------------------ATTAAGTTCTTTTTGTACATTTAGCTCTAATTCTTCGAGTTTTTTATTTTTAGGTTTA
GCTTCTATTAATAATTTTGGAAATCCC--ATATATATTATAACCTGAATCACATCAATTCGTTTTTGAATCTTTATACGT
GAAATTCCCTCAACACCAAAAGAAACTTTCATATCTTTTTGTACATAATTCTTGATACAGTTTCTTATTTTTTGATCTTC
TTGTAGACCCTCGGAAKAATTTTTTGGT----------------------------------------------------
--------------------------------------------------------------------------------
----------------TGATTTTTTTTTTTTTTTT--------TTTTTTTTTTTCT------------------------
-----------------------------------------------------------------------------ATT
CTTCATATA----------------------------------AGGATATATCTTTCAGTACAATAGTTATATGACAAGT
CGGTCTTTTTATTAGAGAATTGCGCCCTCGAGCTCGAGGTTTTAATCTTTTCACAGTAGCACCCTCGTTGACTTCGGCTT
TACTAATGACTAAACTCGCTTCGTTGAAGCCCATATTGTGACTAGCATTTGCCGCTGCAGAATAAACTAATTTAAAAATG
GGAAAACATGCTCGATAAGGCATGAGCTCTAGTATCATAAGTGTTTCCTCGTAGGAACGCCCACGAATCTGATCAATTAC
TCTTCGCGCTTTGTGGGCAGACATACATATATGT----------------------------------------------
--------------------------------------------------------------------------------
------------------------------T-------------------------------------------------
-----------------------------------------------------------GATAT------TTGC------
-------------TT----T------TATTAACGACGAGATTTATTATCATTTTTTGCATGTCCCCGGAAATTTAGAGTA
GGTGAAAATTCTCCCAATTTATGACCCACCATACGATCTATTATATAAATAGGTAAATGTTCCTTTCCATTATGGATAGC
AATAGTATGGCCAATCATTGTGGGTATAATGGTAGATGCCCGGGACCACGTTACTATTATTTCTTTTTCTGCCTTTGTGT
TAAGTTTATTTATTTTTCTTAATAAATGATTTGCTACAAAAGGGTTTTTTTTT--AGTGAACGTGTCACAGTAAATTTC-
----TCCTAT--TTT-TTTTTTTTTTGAAAAGACGAAGAAACAAATTCTATTTTCTCTCCTA-----TTTACTACGGCGA
CGAAGAATCAAATTCTCACTATATTTATTCCTTTTTCTACTTCTTCTTCCAAGTGCAGGATAACCCCAAGGGGTTGCGGG
TTTTTTTCTACCAATTGGGGCCCTCCCTTCACCACCCCCATGGGGATGGTCTACAGGGTTCATAACTACTCCTCTTA---
----ACGCTTACCTAGCCAACATTTAGATCCGGCTCTACCCAAACTTTTCTGGTTCACCCCAGCATTCCCTACTT-----
------------------TTGGATATTAAACGAACCTCCCCAGAAGGTAATTTTAATGTGGCCGATTTCCCCTCTTTTGC
AATCAGTTTCGCTACAGCACCTGCAGCTCTAGCTAATTGTCCACCCTTTCCAAGTGTGATTTCTATGTTATGTATGGCCG
---TGCCTAAGGGCATATCGGTTGAAGTAGATTCTTCTTTTTGATCAATCAAAACCTCTT-----ACCGTACAAGCTTCT
TCCAAAGCATACGGCTTTCTGGGTGTAGATGATGATATCTATACAGATGGATCTTATCTATCATACAATGAAGT-AAAGT
ACTACATGAGTGGATATATAGGAATCCAAATCTGCCGAATCACTCATGTTATGCTCTTCTACATCCTAGGTCTTCCCGTT
CCCTCATCTGGCTTATGTTCTTCATGTAGCATTCAGATCGAATGACTCTATGAAATTACGTCGATACTTCCACATATTAG
GGGTAACGTAG--------------------------------------------CTGCTTAGCTTTCAATTCGTCTCTG
ACCATCAAATGAAATGTGAATAACCCGTCCTCCTCTYTTTGAAACAAGGGGCGCTTCTGGTTCTGTCGGTGCTTGAAACA
ATTTTGTCTTCTCCATATTA------------------------------------------------------------
---------------------------------GTAGAGGTACTCAAATTGGATCAGTGATCGATTTCTAGGTTTCGTCG
TAAACCTAATTGGTT-----------------------------------------------------------------
------------------------------------------------GGATGTAAAATATATCTCTTCTCACCATCCCC
ATAGTGTATGAGACAAATGTATGCATTTCGATTAGGGTCGTATTCTATGGTTACGATTCTACCATATATTTCTTTTTCAT
TCCGTCGAAAATCGATTTTACGGTATAGACGCTTATGACCTCCCCCTCTATGCCTTGCGGTAATGATTCCTCTAGCATTA
CGTCCTTTACCACAACGATGCTGTCCATAGATCAAATTATTTCGTGTATTGGATTTTACTTGACTGTCTACGGCTCCATT
GCGTGTGCTCGGGGTAGAAGTTTTGTATAAATATATCGCCATGCTATTAAGTATTTTGAT-----TTAAGTTCTTTTCTT
TCTAAGAGGTGGAATAGAATAACCCGGTTGAAGCGTAATGATCATACGTTTGTAATGCATTGTATGTCCCATAATAGGTC
TCATTCTTCTACCCTTTCCCGGGAGT--------------AGCTATTACCTTGACACCAAAGAAGAGTTCGACCCAATGC
TTTATTTCTGTCCTAGTTGATCCTAATTCGACATTAAAAGTATATTGATTTTTCCCCAATAACTGAATACTTTTGTCTGT
AAATACTGCATATTTGATTCCATCCATAAATCTATTTTCTTCCCTATGAGTTCTAGTCTCAGTAAGAATGCTAGTTCTTA
CTGTTCATATGTTATGATATGAATATACCACACCAATTCGTTATG-----------------------TACAGAGCCAAT
TCCAATAGACTTATTGGAGGGTCCCATTGGCGTGCATCCAGTAGGAATTGAACCTACGAATTCGCCAATTATGAGTTGGG
CGCTTTAACCATTCAGCCATGGATGCTTAGCGGGGATCCTCGTACATGG-------------------------------
-----------------------------------------------ACATCAATTCAA---ATCCTGGATTTTCGAATT
GAGAGAGATATTGAGAGAGATCAAGAATTCTCACTATTTCTTAGATTCATGGACCCAATTCAATTCAGTGGGATCTTTCA
TTCACATTTTTTTCCATCAAGAGCGTTTTATAAAACTCTTGGACTCCCGAATTTGGAGTATCCTACTTTCACGCAATTCA
CAGGGTTCAACAAGGAATCGATATTTCACGATCAAG---GGTGTAGTACTATTTGTAGTAGTGGTCC-------------
--------------------------------------------------------------------------------
-------------------------------------TATCAATAGGTTGATTGTTTCGCTCCTGTATCTTCCAAAAGGA
AAAAAGATCTCTGAGAGCTGTTTCCTGGATCCGAAAGAGAGTACTTGGGTTCTTCCAATAACTAAAAAGTGTATCATGTC
TGAATCTAA---------------------------------------------------TTGTAAGATATCTAATGAAA
CCGTCGCTGGAATTGAGATCTCATTCAAAGAGAAAGATATCAAATATCTGGAGTTTCTTTTTGTATA---TTATATGAAT
GATCCGATC--CGCAAGGACCACGATTGGGAATTGTTTGATCATCTTTCT------------------------------
------GGACAGCTATTCGAAATCTTAGTGAAAGACTGGATTTGTTATCTCATGTTTGCTTTTCGTGAAAAAATACCAAT
TGAAGTGGAGGGGTTCTTCAAACAACAAGGAGCTGGGTCAACTATTCAATCAAATGATA---------------------
--------------------------------AATTGTGCTCAATTTCATATGTGGCAATTCCGCCAAGATCTCTTCGTT
AGTTGGGGGAATAATCCGCACGAATCGGATTTTTTGAGGAACATATCGAGAGAGAATTGGATTTGGTTAGACAATGTGTG
GTTGGTAAACAAGGATCGGT------TTTTTAGCAAGGCACGGAATCTATCGTCAAATATTCAATATGATTCCACAAG--
---ATCTAGTTTCGTTCAAGGAAGGGATTCTAGCCAATTGAAGGGATCTTCTGATCAATCCAGAGATCATTTCGATTCCA
TTAGGAATGAGGATTCGGAATATCAC------------------------------------------------------
--------------------------------------------------------------------------------
---------------------------AGGTGAGAAGGAGATGAATAATCATCTGCTTCCGGAAGAAATTGAAGAATT--
-------TCTTGGGAATCCTACAAGATCCATTCGTTCTTTTTTCTCTGACAGATGGTCAGAACCTCATCTGGGTTCGAAT
CCTACTGAGAGGTCCACTAGAGATCAGAAATTGTTGAAGAAAGAACAAGATATTTCTTTTGTCCCTTCCAGGCGATCGGA
AAATAAAGAAA---------------------------------------------------------------------
--------------------------------------------------------------------------------
--------------------------------------------CACGTTACACCACGATTTTGAATCAGAAAAGAGATT
TCAAGAAATGGCGGATCTATTCACTCTATCAATAACCGAGCCGGATCTGGTGTATGATAAGGGATTTGCCTTTTTTATTG
ATTCCTACGGATTGGATCAAAAACAATTCTTGAATGAGGTATTCAACTCCAGGGATGAATCGAAAAAGAAATCTTTAT--
--------------------------------------------------------------------------------
------------------------------------------------------------------------------CA
ACCAATATGGATTGATCCGAAATCTGATTCAAA---TCCAATATAGCACCTATGGGTACATAAGAAATGTATTGAATCAA
TTCTTTTTAATGAATAGATCCGATCGCAACTTCGAATATGGAATTCAAAGGGATCAAATAGGAAATGATACTCTGAATCA
TAGAACTATAATGAAATATACGATTAACCAACATTTATCGAATTTGAAACAGAGTCAGAAGAAATGGTTCGATCCTCTTA
TTTTTCTTTCTCGAACCGAGAGATCCATGAATTGGGATCCTAATGCATATAGATACAAATGGTCTAATGGGAGCAATAAT
TTCCAGGAGCATTTGGAACATTTC---------------------ATTCAAGTA--GTGTTCGATCGATTACGTATTAAT
CAATATTCGATTGATTGGTCTGAGGTTATCGACAAAAAAGATTTGTCTAAGTCACTTCGTTTCTTTTTGTCCAAGTTACT
TCTTTTTTTGTCCAAGTTTCTTCTCTTTTTGTCTAACTCACTTCCTTTTT------------------------------
-----------------------------AAAGGTCCGAATGATCAACTCTGTAATCAGCTGTTAGAACCAATAGGTCTT
CAAATCGTTCATTTGAAAAAATTGAAACCCTTCTTATTGGATGATCATGATACTTCCCAAAAATAGAAATTTTTGATCAA
TGGAGGAACAATATCACCATTTTTGTTCAATAAGATACCAAAGTGGATGATTGAC-------------------------
----------------------TTCTTATTTCTCAATGATATCCCACGATCAAGACAATTGGCTGAATCCCGTAAAACCA
TTTCATAGAAGTTCATTGATATCTTCTTTTTATAAAGCAAATCGACTTCGATTCTTGAATAATCTATATCACTTCTGCTT
CTATTGTAACAAAAGATTCCCTTTTTATGTGGAAAAGGCCCGTATCAAGAATTATGATTTTACGTATGGACAATTCTTCA
A---------------------------------------------------------------A---------------
--------------------------------------------------------------------------------
------------------TCTTTCCATTTTCCAATTCGATCCGATCCATTCGTTCGTAGAGCTATTTATTCGATCGCAGA
CATTTCTGGAACACCTCTAA-CAGAGGGACAAATAGTCAATTTTGAAAGAACTTATTGTCAACCTCTTTCGGATATGAAT
CTATCTGATTCAGAAGGGAAGAACTTGCATCAGTATCTCAATTTCAATTCAAACATGGGTTTGATTCACACTCCATGTTC
TGAGAAAGATTTACCATCCGAAAAGAGGAAAAAACGGAGTCTTTGTCTAAAGAAATG----------CGTTGAA------
------AAAGGGCAGATGT-ATAGAACCTTTCAAC---------GAGATAGTGCTTTTTCAACTCTCT------------
--------------------------------------------------------------------------------
--------------------------------------------------------------------------------
--------------------------------------------------------------------------------
------------AAATGATTCATCGAAATAATGAGTCACCATTGATATCGACACATCTGAGATCGCCAAACGTTCGGGAG
TTCCTCTATTCAATCCTTTTC---------CTTCTTCTTGTTGCTGGATATCTCGTTCGTACACA--------TCTTCTC
TTT---------GTTTCCCGAGCCTCTAGTGAGTTACAGACAGAGTTCGAAAAGGTCAAATCTTTGA-------------
--------------------------------------------AATTGAATTCTTTCTGGTTAAAGAATCTCTTTCTAG
TTGCTCTGGA-ACAATTAGGAGATTTTCTAGAAGAAATACGGGGTTCTGCTTCTGGCGTCAACATGCTATGGGGTGGTGG
TCCCGCTTATGGGGTCAAATCAATACGTTCTAAGAAGA------ATTTTTTGA----ATATCAATCT-------------
--------------------------------------------------------------------------------
--------------------------------------------------------------------------------
--------------------------------------------------------------------------------
-----------------TCATTTATCAAAGAATGACTCTGGTTATCAAATGATTGAAGAGCCGGGAGCAATTTACTTACG
ATACTTAGTTGACATTCATAAAAAGTATCTAATGAATTATGAGTTCAAT-----------------------GATATTCC
TTGCTCATT--CAGACAATCACTTATTCACAAACCTCGTGTGGGGCGAATAGTTTTCATTTCCCATCTCATGGAAAACCC
TTTTCGCTCCGCTTAGCCCTATCCCCCTCTAGGGGTATTTTAGTGATAGGTTCTATAGGAACT-----------------
--------------------------------------------------------------------------------
--------------------------------------------------------------------------------
-------------------------------------------------------------------AATTAGCAAAAGC
AATGTCTCCTTGCATAATATGGATTCCAAACATTCATGATCTGGATGTGAATGAGTCGAATTACTTATCCCTTGGTCTAT
TAGTGAWCTATCTCTCCAGGGATTGTGAAAGATGTTCCACTAGAGATATTCTTGTTATTGCTTCGACTCATATTCCCCAA
AAAGTGGA-------------------------------------------------AGGCTTCTTATTCCACAACAACG
AAAGCACTTTTTCACTCTTTCATATACTAGGGGATTTCACTTGGAAAAAAAAATGTTCCATACTAATGGATTCGGGTCCA
TAACCATGGGTTCC------------------------------------------------------------------
-----------TAATATAATTAGATCTGCTCTTCATAGACAAACTTGGGATTTGCGATCCCAGGTAAGATCGGTTCAGGA
TCATGGGATCCTTTTCTATCAGATAGGAAGGGCTGTTGCACAAAATGTATTTCT--AAGTAATTGCCCCATAGATCC---
------------------------------------GGATTCTTATTTGTACAAATGGTACTTCGAACTTGGAAYGAGCA
TGAAGAAATTRACGATACTTCTTTATYTTTTGAGTTGTTCTGCCGGATCGGTTGCTCAAGACCTTTGGTCTCTACCCGGA
CCCGATGAAAAAAATGGGATCACTTATTATGGACTTGTTGAAAATGAT--------------------------------
--------------------------------------------------------------------------------
------------------CTTAGATATGATGCAAAATGGATCTTGTTCTAT-------CCTTGATCAGA------GA---
---TTTCTCT------ATGAAAAATACGAATCGGAGTTTGAAGAAGGGGAAGGAGAAGGAGT--CCTCG------ATCCA
CAACAGATAGAGGAG------GTTTTATTCAATCACATAGTTTGGGCTCCTAGAATATGGCGCCCCTGGRGCTTTCTATT
TGATTGTATYGAAAGGYCCAATGAATTGGGATTTYCCTATTGGGTGAGGTCATTTTGGGACAAGCGGATCATTTATGATG
AAGAGGATGAGCTTCAAGAGAATCAT------------------------------------------------------
--------------------------CCAATTCA-TTGGGACCCTGCGGATCCACTCTTTTTCCTATTCAAAGATCCGCC
CTTTGTCTCTGTGTTTTCACATCGAKAATTCTTTGCAGATGAAGAGATGTCAAAGGGGCTTCTTACTTCCCAAACCAATC
CTCCTACATCTATATATAAACGCTGGTTTATCAAGAATACGCAAGAAAAGCACTTCGAATTGTTGATTCATCGCCAGAAA
TGGCTTAGAACCAATAGTTCATTATCTAATGGATTTTTCCGTT-------------------------------------
--------------------------------------------------------------------------------
--------------------------------------------------------------------------------
-----------------------------------AAAGATATGTGGCCATGAAATA-GGGATTAAGTGGAACAGAATTG
AC------TGGGTGGTAAAGTCGTGGAAACACCTCTTTCTTCCATATTTTGGACATGGAAGAATATGTTACTGCTGAAAC
T---------------------------------ATGTATG-GATGGTATGAACTGCCTAAACAAGAATTCTTGAACAG-
CGAGCAACCAGAGCTATCA--------------AAATATCAAAAAGGGGCAGAGGTAAATCCATTGGAAAATAAAAAATA
CGT-ATGTC------------GGATGAAATGGTGGTTGTTGCTATCTGCTCCAA------TAACGAATCAT---------
---TGGTTTAACTGAATAACTAAATGAATAACTAAATAAAATAGATAG------------AAC-----------------
--------------------------------------------------------------------------------
-------------------------------------------------------------------------------G
GACTA-------------------------------------TGTAA-TGT-----------------------------
---------------------------------------------------ACTTTATCTG-------------------
------------------------------------T---------------TGTAATGTACTTTATCTGTTGGGTGACG
GGCGGGCAT--------TTTATCAGAGGTTTCTATTGTATCAATCTACTCT-TGTGTAATTCCTGTTGAAGCATATA-CT
C-GGGGGTGGTTGCAGGGCGAACGATTTCAAAGCGGACT----------------GAGAAGATCACCAAGAT--------
TTCGT----GATCCGCTGCCGAACTTATT-CCAATTCAATGAGCATTCTCAATATTATGCCTTGAAGAGGACTC------
--------------------------------------------------------------------------------
--------------------------------------------------------------------------------
--------------------------------------------------------------------------------
-----------------------------------------------------------TCGAT----------------
--------------------------------------------------------------------------------
-------TCGATTCAATAGACGCCCAAAGAGGTGAATAGAATAGGGTC-----CCAA------AGAGATATATATGTAAA
AAGCAGTTCCGATTACGCCTATTC----CTAATCCTAAATGGAATG----------------ACGGA-------------
---------GGGATC-----------------------------------------------------------------
--------------------------------------------------------------------------------
--------------------------------------------------GTCCGGTATGGAATGAACTTATAATCCTGG
AATCGACTCGATTATCAGATTATAAGTTCATAACCCTAGCCCATTTCCATTTTGGGCGGAACAGATCTACTAATTCTTTG
ATTCCAGTTAGTAAGAGGGATCTTGAACTAAGAAATAGGTTCTAGAAGCTAAAAA-------------------------
----------------------------AGATGCTATTACACATACAATCATACTCAATTCGATGGAATTGTTTGATCTT
AAA---------------------------------TTATTTCTTGGTTTCGTCCAGTCATTAATAACTTGATTATTTTT
AGATAATAGTAGATAGAAAGA---------------------------------------------TGCCATCCACACCA
GAATAAATGGAGTTT---TCCGAAAAAACCTGCTAG--------------------------------------------
--------------------------------------------------------------------------------
--------------------------------------------------------------------------------
--------------------------------------------------------------------------------
----------------------------------------TAGGATTTCCAGAAGAAGAT-GCCATTCGTTTGATGAGAA
ATAAAAAGGAATATCGAAAATTCGAGTGGCTGAAGCTGAAGCAGCTACTTTCGAAGTAACAGAAAGAAAAGCAACGACTG
GAGTGGGAGAGTC-------------------------------------------------------------------
------------------------------------------TCTTCTTTCTTTTTTGATTACCTTCCTCGCGTATGTAT
AAGACCGAATCCATTCGATTTCT------AAAAAGGATGACTAATCCTTAACTTTTCGA--------GGAATCC------
--TTGATCAG--------TGG-------TTGTGA--ATGACCAATTTTTCTCAATCTTTCTGACT--------TGCTCCT
A----------CGGAAC-----CAAGAGGTC-------------AATAGAACCATCTGATTTGATTCGTTCTCAATAGCC
ATGAGATGATCATCTTAGGGTGATCCTTTTGTCGACGGATGCTCCTATTACACTCGTAGTCTCTGAAGGATGAGAACCAA
CTATGTAGCATCTA-CATCGAGAATTTAAATATTGTATACGTCATTAGTCCGATCTTTTGTAGGAGCTACCCGTAATAAC
GAACTTGCAAAATGAATT----TTATCATAAAAAGATTCGTTGTTCCTGACGCTGCTTCACCTTAATTRTTATTTGAACA
AGTAAAAGTTATGTCTTGGTCCGAGTGCGGATAGCATTTCTCTTCTGCATGTCCATGGAGTTTTGAAAAATCCAAGCATC
TCAGAGATAGAT--AGAGAAGTWG--GAATTTTTCGAACGAACCGCACTCCTTCGTATACGTCAGGAGTCCATTGATGAA
AAGGGGCTAGGGAAA----------------------------TATAAGCGCAATTGAAATTCCTGGGGAGTTATACATT
TGTGTATTGATAAGACCATTCACTATTTCTTGAAGCTCGATCTCTCCCCCGGA-CGAACCATATAGCCAAGAGAAACCAT
GAACCAGAATAGAAGAGCTTGCCCCACCCATGAGTAAATATTTCATAGTAGCCTCATTAGACCGTACATCTTTCTTGGTA
TATCCAGATAATAGGTAGGAGCATAAACTGAAACATTCTGGAGCTACAAAGATAGTTATTAAATCGTTAGCACCGCATAA
AAACATTCCTCCTAGAGTAGCTGTTAATACGAATAAGAGAAACTCTGTTATAGCCATTTCTGTACATTCAATGTA-----
--------------------------------------------------------------------------------
--------------------------------------------------------------------------------
-----------AAGGTATATCTTTTTGATCAGAAGTTGAATCGATCATCAGAAGAAGAATTAGGCCAAAAATTAGGATAC
ATTCTGGGAAAATAAAACTTCCATCGAAGAGAAGCAAATGAAAGGCTTTCATAAAAATTCTCGTAGAATCGAGAATGAA-
----------------------------------------------------------------------------TTCT
--C------TTTTTTTTTTGGAATGGAATATTTACGGAATCCCCATAAATAGGATCAAACCTTATTCCATGGTATTTACC
-----CTTTTTT-----TAT-----TCTTAAGCAAGTCCCCGAGAGGGCTTAATTGATCCATGATTTATGTTTCATCTTT
CGTTTCCTTTTCGTTTGTTTCGAGAAATATAGCGATCAATTCCGAT-TCCTTCTTTTTCTATTGATT--------CTTTT
CCGATCGAGATGTATGGCTC-----CATGAGTCTAT------------ATAGATCCTGTTCATGGATTAACGAAAATGCG
CAAAAG-------------------------------------------------ATCGCCACTCCCTTTGGCAGCATCC
ACTAATTCGGAACTTAATTTGAAAGCCATATTTCGGCCCGGACGTTTTCGGGATGCCCCTAATAACCAACGAATGGCAAG
TGCTTTTCCTTGTGTGGATCCTATTTCAATGGGAACTTGATGAGTCGATCCGCCTACACGTCTTGCTTTTACTGC-----
-------TACTCCACGTATTGCTTGACGTAAAACAGATAGTGGATTTGTTTCTGTCTTTTGTTGAATCTTTTTCATGGCT
CGATAGATAATTTGATAAGCCAATGATTTTTTTCCGTGTTTCAGAATACGGTTAACCAACATGTTAACTAATCGATTACG
ATAAATTGGATCGGATTTTGCAGTTTTTTCTTCTGCAGTACCTCGACGTGACATGAGCGTACAAGGGGTTCT---CAAGA
ATCAGTTTTCCTKTTATAAGGGCTAATAAAATCATTTATTTTGGCTTTTTGACCCCATATTGTAGGGTGGATCTCGAAAG
ATATGAAAGACCTCCCTCCAAGCCGTACAT-----------------------------------------------TGA
GATCGAGTATGGAATTCTGTTTACTCACTTTAAATTGAGTATCCGTTTCCCTCCTTTTCCTGCTAGGATTGGAAATCCTG
TATTTTACATATCCATACGATGGAGTCCTTGGGTTTCCGAAATAGTGTAAAAAGAAGTGCTTTGAATCATTGCTATTTGA
CTCGGACCTGCTCTAAAAAAGTCGAGGCATTTCGAATTGTTTGTTGACACGGACAAAGT---------------------
--------------------------------------------------------------------TCTCATGGTAGC
CCGCTCCAGTCCCCTTACGAAACTTTCGTTATTGGGTTAGCCGTACACTTTACATGTTTCTAGCGATTCACAT-------
--------------------ATAAGAATCTACAACGCACTAGAACGCCCTTGTTGACGATCCTTTACTCCGACAGCATCT
AGGGTTCC------------------------------------------------------------------------
--------------------------------------------------AGGTTAATCGTACTCTGGCAACTTTACGTA
AGGCAGAGTTTGGTTTTTTGGGGGTAATAGTGGAAAAGTTGACAGATAAGTCACCCTTACTGCCACTCTACAGAACCGTA
CATGAGATTTTCACCTCATACGGCTCCTCGTTCAATTCTTTCGAAGTCATTGG---------------------------
--------------------------------------------------------------------------------
--------------------------------------------------------------------------------
--------------------------------------------------------------------------------
--------------------------------------------------------------------------------
--------------------------------------------------------------------------------
--------------------------------------------------------------------------------
--------------------------------------------------------------------------------
--------------------------------------------------------------------------------
--------------------------------------------------------------------------------
--------------------------------------------------------------------------------
-------------------------GAATCCATTTTCTGAAAGATCCTGGCTTTCGTGCTTTGGTGGGTCTCCGAGATCC
TTTCGACGACCTATGTTGTGTTGAAGGGATAT------CTATATGATCCGATCGAT------------------------
--------------------------------------------------------------------------------
--------------------------------------------------------------------------------
--------------------------------------------------------------------------------
--------------------------------------------------------------------------------
--------------------------------------------------------------------------------
--------------------------------------------------------------------------------
------------------------------------------------------TGTGTTCC--------TAAGAAAAGG
AATTTGTCCATTTTTTGGGGTCTCAAAGGGGCGTGGAAACACATAAGAACTCTTGAATGG----AAAAGAGATGTAACTC
CAGTTCCTTCGGAAATAGTAAGATCTTTGGCGCAAGAAG-AAGGGGTTGATACGTATCATCTTGA---------------
--------------------------------------------------------------------------------
--------------------------------------------------------------------ATCCGTAGTCAA
TCCTATTTCCGATAGGAGCAGTTGACAATTGAATCCAATTTTTCCCATTATTTTCGTATCCGTAATGGTGCGAAAAGAAG
GCCCGACTCCAAGTTGTTCAAAAATAGTGGCGTTGAGTTTCTCGACCCTTTGCCTTAGGATTAGTCAGTTCTATTTC---
---TCGATGG----------------------------------------------------------------------
--------------------------------------------------------------------------------
-----------------------------------------------GGAGCGAACTCTAAGCGAATATGAAGCGCATGG
ATACAAGTTATGC-------CTTGAAATGAAAGACAGTTCCGAATCAGCTTT----------------------------
--------------------------------------------------------------------------------
--------------------------------------------------------------------------------
--------------------------------------------------------------------------------
--------------------------------------------------------------------------------
--------------------------------------------------------------------------------
--------------------------------------------------------------------------------
--------------------------------------------------------------------------------
--------------------------------------------------------------------------------
-----------GTGAAATGCGTAGAGATCGGAAAGAACACCAACGGCGAAAGCACTCTGCTGGGCCGACACTGACACTGA
GAGACGAAAGCTAGGGGAGCGAATGGGATTAGATACCCCAGTAGTC----------------------------------
--------------------------------------------------------------------------------
--TGACGGGGGCCCGCACAAGCGGTGGRGCATGTGGTTTAATTCGATGCAAAGCGAAGAACCTTACCAGGGCTTGACATG
CCGCGAATCCTCTTGAAAGAGAGGGGTGCCTTCGGGAACGCGGACACAGGTGGTGCATGGCTGTCGTCAGCTCGTGCCGT
AAG---GTGTTGGGTTAAG-------------------------------------------------------------
--------------------------------------------------------------------------------
--------------------------------------------------------GTCCTCAGTTCGGATTGCAGGCTG
CAACTCGCCTGCATGAAGCCGGAATCGCTAGTAATCGCCGGTCAGCCATACGGCGGTGAATTCGTTCCCGGGCCTTGTAC
ACACCGCCCGTCACACTATG-GGAGCTGGCCAT-----------------------------------------------
-------------------------------------------------------------------------------T
AATGCTTGTTGGGTATTTTGGTTTG----------ACACTGCTTCACACCCAAAAAGAAGGGA-GCTACGTATGA-----
----GTTAAACT---------TGTCGACGGAAGTCTTCTTTCGTTTCTCGACGGTGAAGTAAGACCAAGCTCATGAGCTT
A-------------------------------------------------------------------------------
--------------------------------------------------------------------------------
--------------------------------------------------------------------------------
--------------------------------------------------------------------------------
--------------------------------------------------------------------------------
--------------------------------------------------------------------------------
--------------------------------------------------------------------------------
--------------------------------------------------------------------------------
--------------------------------------------------------------------------------
--------------------------------------------------------------------------------
--------------------------------------------------------------------------------
----------------------------------------------------------------------------AGCA
GGTTTG------AAAAAGGATCTTAGAGTGTCTAAGGTGGGGCCAGGAGGG-----------------------------
--------------------------------------------------------------------------------
------------------------------------------------------------------------TGGACCGT
AGGTGCGATGATTTACTTCACGGGCGAGGTCTCTGGTTCAAGTCCAGGATGGCCCAGCTGC-------------------
--------------------------------------------------------------------------------
--------------------------------------------------------------------------------
--------------------------------------------------------------------------------
-------GGTAGGATGGGCAGTTGGTCAGATCTAGTATGGATCGTACATGGACGATAGTTGGAGTCGGCGGCTCTCCTAG
GGTTCCCTCATCTGGGATTCCTGGGGAAGAGGATCAAGTTGGCCCTTGCGAACAGCTTGATGCACTATCCCCCTTCAACC
CTTTAGCGAAATGCGGCAAAAGGAAGGAAAATCCATGGACCGACCCCATCGTCTCCACCCCGTAGGAACTACGAGATCAC
CCCAAGGACGCCTTCGGCATCCAGGGGTCGCGGACCGACCATAGAACCGTGTTCAATAAGTGGAAGGCATTAGC-----T
GTCCGCTCTCAGGTTGGGCAGTAAGGGTCGGAGAAGGGCAATCACTCATTCTTAAAACCAGCATTCTTAAGA-CCAAAGA
GTGGGGCGGAAGGGGGGA--------------------------AAGCTCTC----------------------------
-----------AAGAATCCTTAGTT---------GAATGGG--------A--------TTCCAA--------CTCAGCAC
CTTTTGAGATTTTGAGAAGAG--------TT-----GCT--------CTTTGG--------AGAG-------CACAGTAC
GATGAAAGTTGTAAGCTGTGTTC-------GGGGGGAGTTATTGTT----------------------------------
--------------------------------------------------------------------------------
-----------------------------------------------------------------TCTATG-TTTATCAT
TCATGGACGTTGATAAGATCCTTCCATTTAGCAGCACCTTAGGATGGCATAGCCTTAAAGTTAAG------GGCGAGGTT
CAAATGAGGAAAGGCTTACGGTGGA--------------------------GGTGTAGTAAGCGACGAAATGCTTCGGGG
AGTTGAAAATAAGCGTAGATCCGGAGATTCCCGAATAGGTCAACCTTTCAAACTG-------------------------
--------------------------------------------------------------------------------
--------------------------------------------------------------------------------
--------------------------------------------------------------------------------
--------------------------------------------------------------------------------
--------------------------------------------------------------------------------
--------------------------------------------------------------------------------
--------------------------------------------------------------------------------
--------------------------------------------------------------------------------
---------------------------------------GAG-----GCGCAGCAGTTGACTGGACATCTAGGGGTAAAG
CACTGTTTCGGTGCGGGCCGCGAGAGCGGTACCAAATCGAGGCAAACTCTGAATACTAGATATGACCTC-----AAAATA
ACAGGGGTCA-----------------------------------------AGAGGGAAACAGCCCGGATCACCAGCTAA
GGCCCCTAAATGACCGCTCAGTGATAAAGGAGATAGGGGTGCAGAGACAGTCAGGAGGTTTGCCTAAAAGCAGCCATCCT
TGAAAGAGTGCGTAATAGCTCACT-GATCGAGCGCTCTTGCGCCGAAGATGAACGGGGCTAAGCGATCTGCCGAAGCTGT
GGGATGTA---AAAATGCATCGGTAGGGGAGCGTTCCGCCTTAGAGGGAAGC----------------------------
--------------------------------------------------------------------------------
----------------------------------------------------------CAACAGGTGAATATTCCTGTAC
TACCCCTTGTTGGTCCCGAGGGACGGAGGAGGCTAGGTTAGCCGAAAGATGGTTATCGGTTCAAGGACGCACGGTGTCC-
--------------------------------------------------------------------------------
--------------------------------------------------------------------------------
--------------------------------------------------------------------------------
--------------------------------------------------------------------------------
--------------------------------------------------------------------------------
--------------------------------------------------------------------------------
--------------------------------------------------------------------------------
--------------------------------------------------------------------------------
--------------------------------------------------------------------------------
--------------------------------------------------------------------------------
--------------------------------------------------------------------------------
--------------------------------------------------------------------------------
--------------------------------------------------------------------------------
--------------------------------------------------------------------------------
-----------------GGGCTGTAGTATGTTCCAAGGGTTGGGCTGTTCGCCCATTAAAGCGGTACGTGAGCTGGGTTC
AGAACGTCGTGAGACAGTTCGGTCCATATCCGGTGTGGGCGTTAGAGCATTGAGAGGACCTTTCCCTAGTACGAGAGGAC
CGGGAAGGACGCACCTCTGGTGTACCAGTTATCGTGCCCACGGTAAACGCTGTGTAGCCAAGTGCGGAGCGGATAACTGC
TGAAAGCATCTAAGTAGTAAGCC---------------------------------------------------------
------------------------------------------------TTTTGAGAATTCAAGAGAAGGTCACGGCGAGA
CGAGC---------------------------------------------------------------------------
----------------------------------------GTACTCGCCATCTATTTTTATTGTTCAACTC---TTTGAC
AACATGAAAAAACCAAAAGCTCTGCCCCCCCTCTCTATCGATCCAAGG-GATGGAAGGGCGGAGGCCTTTGGTGTCCCCT
---GTCAATAATTGGGGCCTCACAATCACTATCCAATATGTTTTTCTCTCATGCCTTTCTTCGTTCATAGTTCGATATTC
TGGTGTCCTAGGCGTAGARGAACCACACCAATCCATCC---------GGTGGTTAAACTCTACTGCGGTGAAGATACTGT
AGGGGAGGTCCTGCGGAAAAATAGCTCGACGCCAGGATGATAAAAAGCTTA-----------------------------
----------------------------------------------------------------------------TCTC
TCCCACTTCACACCTCGGAACGCACCGTTCTTATCTTATAGAGAGAGAGAGGCGCTTTCGCATCTTCTT-----AACCC-
-----GAAATGGCTGGGGAGAGGAAAGGTTCCTTTTTTAGGGTACTC---------------------------------
--------------------------------------------------------------------------------
------------CCCCTCCCTCTGGAGGTAGGAAAATCATGATCGGGATAGCGGATCCAAGGCTATGGAACTTGGG----
--------------------------------------------------------------------------------
--------------------------------------------------------------------------------
---------------------------------------------------------------AATCAGCA---------
-TATTTTTTTG----------TTTTACG---------CCCCATAACTCTTCC------TCAGCCAGGCTTG---------
GGCAGAATAGCAGA----------GCAAGTATTAG-----TAGCATAGCAAAAATGTGTTCGTCGTCATTAATA----TG
TTTGCTCGCGGTAA------------------------------------------------------------------
--------------------------------------------------------------------------------
--------TCTCAAATATCGCAGAACAGAATGTGATATGATGAGATAGAATGCAATAGAAAGAAAGCCACAGGGAACGGG
TTACCTACTCTTAACGGTCAAAGCAAACCCTTT-----------------------------------------------
--------------------------------------------------------------------------------
-------------------------------------------------------AAGTTTCCTTCGTAACTCCCGAAAC
TTCTTCGTAGTGTCTTCGTTCCATGCCTCATTTCATAGGGAA---------CCTCAAAGCGGCTCTATT---------TC
ATTATATTCCATCCATATCCCAATTCCATTCATTTAATATCC-----C----CT-----TTGGTGTCATTGACATAAGAG
ATGTCGTTTCTAGTCTATCTGTTTCTA-----------------------------------------------------
----------------------------------------AAAAG-AAAAAGGGGGGTTTGTGATATGATTTTGAAATCT
TTTATACTAGGTAATCTAGTATCCTTATGCATGAAGATAATCAATTCGGTCGTTATGGTCGGACTCTATTATGGATTTCT
TACCACATTCTCCATGGGGCCCTCTTATCTCTTCCTTCTCCGAGCTCGGGTTAGAGAAGAAG-----GAGAAGAAGGAAC
CGAGAAGAAGGTATCAGCAAC----------AACAGGTTTTATTACGGGACAGCTCATGATGTTCATATCGATCTATT--
-----------ATGC--------------GCCTCTGCATCT--------------AGCATTG-------------GGTAG
ACCTCATACAATAACTGTCCTA--------------GCTC--------------TACCCTATCTTTTGTTTCATTTCTTC
TGGAACAATCACAAACACTTTTTTGATTATGGATCTACTACCAGAAATTCAATGCGTAATCTTAGCATTCAATGTGTATT
CCTGAATAATCTCATTTTTCAATTATTCAACCATTTCATTTTACCAAGTTCAATGTTAGTCAGAT-TAGTCAATATTTAT
ATGTTTCGATGCAACAACAAGATGTTATTTGTAACAAGTAGTTTTGTTGGTTGGTTAATTGGTCACATT-----------
--------------------------------------------------------------------------------
--------------------------------------------------------------------------------
--------------------------------------------------------------------------------
------------------------------------------------------------AATAAAAGAGATAAACTATA
AAAATAAWCAATT-----TTTTKNAAATTTKATAT------TCTTA----TGATTTAGATGGTA----------ATCAAG
AAAATTC---------------AAAATTGA---------------TAAA-TAAAAAAGATCTCTTCTGGTTTGAAAAACC
TCTTGTAACTAGTCTTTTCGATTACAAACRATGGAATCATCC--------------------------------------
--------------------------------------------------------------------------------
-----------ACTTTTTTAGAAATGATACAAAGAAAAATAGCTATGTTTACAACAAAGGAACTCTCCTTTGATG-----
----AGTTGTCTAATCATTGGAATTCTAACAATGAAAAAAGAAGGAAAAACTTAAATAAAGAGTTTATAAATAKAGTCGA
AGCGCTATATCC--GAGACTTCTTGTTCCGAATACACTAGAAAAAAAGACTAGATTGTGTAATGATGAAACTAAAAAAGA
ATACTTACCTAAAACTTATGATC---------------------------------------------------------
--------------------------------------------G-----------------------------------
--------------------------------------------------------------------------------
--------------------------------------------------------------------------------
--------------------------------------------------------------------------------
---AAAACAAT-----------------------------A---TACTGAAATAAGCAAACAAGTTTCTCGCTGGTCATA
TAAATTACTCGACGAGTTGGAACAACAAGAGGGAGAAAATGAGGAAAACGTGATAGAGGATCATGAGATTCGTTCACGAA
AAGCCAAGCGTGTAGTAATTTTTACTGACAATCAACAAAACAATGATCCTTATAATACCAGCA---AGGATAAAACAAAT
TCTGA---TCAAATAGACGAAGT---------------------------------------------------------
--------------------------------------------------------------------------------
--------------------------------------------------------------------------------
--------------------------------------------------------------------------------
--------------------------------------------------------------------------------
--------------------------------------------------------------------------------
-------------------------------------------------------TTTTTTCAATTTCCCGAATGGTCCG
AAGATTTAAAGGATTGGAATAGAGAAATGCATGTTAAATGCACCTATAATGGAG--------------------------
---------TTAACAGATGGTATTCAAATAAAGATCTTATTTCCTTTTCGTCTAAAACCTTGGCACCGATCTAAA-----
--------------------------------------------------------------------------------
--T-----------------------------------------------------------------------------
--------------------------------------------------------------------------------
------------------------------------AAAAACCGGGTCATCAAAAGCATTCTATTTCTAAAAGAAAAAAT
AAACAAACTTCCAAAATTAAAAAGAAACCCAATTCTATTATTTGGATTTAGAGAAGTATATGGATTGAATGAAACTAAAA
AAGATCCGATAATCAA------------TAATCGAAT-------------------------------------------
-----------------------GA-------------------------------------------------------
--------------------------------------------------------------------------------
--------------------------------------------------------------------------------
--------------------------------------------------------------------------------
--------------------------------------------------------------------------------
---------------------------------------------------------------------TTAGAAAATCA
T------CAAAAAATTGATAAAAGAAATGAAAATGCAATTCACTTTATTT---CAATTAT-AAAAAAGTCACTTATT---
AATAA------TAGTAGCGTTCTTACTAAGAATTCACAACTTTTTTGTGATGTAT-------------------------
--------------------------------------------------------------------------------
--------------------------------------------------------------TTCTGAATTAAAAGATAA
AAATTTTCGAAATTCTG-TAATGAATCAATGGAAAAAC------------------------------------TCTCCG
ATTAGATGGTCTAGATTAATACCACAAAAAAGGCGAAATAAGATCAGTCAAGACCGTATGAT------TCAAAATAAAGA
AAAAAATTTAAACAAATGGATTTTTA------------------------------------------------------
--------------------------------------------------------------------------------
--------------------------------------------------------------------------------
--------------------------------------------------------------------------------
--------------------------------------------------------------------------------
--------------------------------------------------------------------------------
--------------------------------------------------------------------------------
--------------------------------------------------AGCCTTTTGATTGGATGGGAATGAATGAAG
AAATACTAAATCACCCCATATTCAATTTTGAACTTTGGTTTTTTCAAAAATTTGTAATACTTTACAACACCTACAAGATA
AAACCATGGTCGATACCAATCAAATTACTTCTCTTAAATTCAAATGGAAATGAAACTGCTCATGAAAA------------
----------AAGAAAAAAGGAGATCCTCTTATATC----TATATCATCGACTGAAAAAAAATCTATTGAATTAGCGAAT
GGAAATCAAGAAGAAAAAGAATCTGAGGATCAAGTGCATCTTGGATCAGTTCTCGCAAATCAAGAAAAGGATATTGAAGA
AGCTT-----------------------------------------------AATAATACGGAAGCAGAACTCGATTTCT
TCCTAAAAAGGTATTTACGTTTTCAATTAAGATGGGATGATTCTTTGAATCAAAAAATAATCAATAATATCAAAGTATAT
TGTCTCCTGCTTAGACTACCCAATCCA-----------------------------------------------------
---------------------------------------------------------------AGTTCATTTGTCAGTAA
AAAATGATGGACAATTTTTTATGTAT-CAAATCATAGGTATTTTATTGGTTCATAATAGCAAACAACAAATTAATCAAAG
ATACAGAGAAAAAAGCTAT--GTTGATAAAAAGAATTTTATGACACCGATTGAAATAGATCAAAATATAACTGGAAATAG
AGAT------------AAAAATCATAAT----------------------------------------------------
-----------------AAAAAAAAAAATAGAAATGATATTCATATAAATACAAAAATTTTCAATGCTAATAACATAAAA
GACTCTGGTCACATTCTGGATAAAAGCAAACATTTTGATAGAGCTAAA-AATAAACTAATTAAATTAAAGCTTTTT----
-GCCCAATTATCGATTAGAAGATTTAGCTTGTATGAATCGCTATTGGTTTGATACCAATAATGCCAGTCGTTTCAGTATG
GTAAGGATACATATATACC--CACCATTGAAAATTTAGTAAGAGCA-TATCTTTCATATA--------------------
--------------------------------------------------------------------------------
--------------------------------------------------------------------------------
----------------------------CT--------------------------------------------------
--------------------------------------------------------------------------------
--------------------------------------------------------------------------------
--------------------------------------------------------------------------TAAAAT
A--------------AGATAA-----------------------------------------------------------
----------------------------------------------A----------------ATA----------A-GA
AAAGGGGGC--TTTTTTTATG------GTAAAAAATTCATTCATTTCAATTATTTCACAAAAACAAAAAGAAGAAAACAC
GGGATCTATTGAATTTCAAATAAAAAGTTTCGCTAATAAGATACGAAGACTTACTT------------------------
--------------------------------------------------------------------------------
----------------------------------------------AAAAACTCGTTAATTTGAAGAG------TC-CTT
TTTTGAATTATTTGATTTATGAGATCTTGAATTTTGATGAATTTC-TTTTCGTTTTCAGT-A------ATTCATAG-AAG
AATGAATCGAGGAAATCCCTATGAA--------------------------------------------------AGCTA
TCA----------------------TCGTTACTCTAGACGGTTAAGATGTTATTGACTGTGAACCAATTTTAGGTTATTT
ACACAGAGGAATGGAAAAAATTGCGGAAAACCGAA-----ATACAATATTTGCCTTATGTAACACGTTGGGATTATTTAG
CTACGATGTTCACAGAAGCAATAACAGTAAATGGGCCAGAACAGTTAGGAAATATTCAAGTACCTAAAAGGGCCAGCTAT
ATCCGAATAATTATGTTAGAATTAAGTCGTATAGCCTCTCATC-------------------------------------
--------------TCTATATTTTTAGAGAAAGAGAATTAA---------------------------------------
-------------------------------------ATCTACC--TCATGGATGGATAGATAAATGTTTGGATTTCTGT
GATT-ATTTT---------------------------------------AATCCTATTTTTTTAGAACGAGTTGAAGGAG
TAGGTATTGTTGGTTCGGAGGAAGCAATAAATTGGGGTTTATCAGGACCGATGCTACGAGCTTCCGGAATACAATGGGAT
CTTCGTAAAGTTGATCATTATGAGTCTTATGACGAATTTGATTGGGAAGTTCAGTGGCAAAAAGAAGGAGATT-------
---TTATTTAGTCCGAATTGGTGAAATGACGGAATCCATAAAAATTCTTCAACAAGCTCTGGAAGGAATCCCAGGAGGAC
CTTATGAAAATTTAGAAACGCGATGTTTTGATAGAGAAAGGGATCCAG---AGTGGAATGAT-TTTGAATATCGATTCAT
TAGTAAAAAAA---------------------------------------------------------------------
---------------------------------------------------------CGGGTTTTATCAATTTGCAAATT
CTTCCTCAATTAGTTAAAAGAATGAAATTGGCTGATATTATGACAATACTAGGTAGCATA--------------------
--------------------------------------------------------------------------------
--------------------------------------------------------------------------------
--------------------------------------------------------------------------------
--------------------------------------------------------------------------------
-----------------------------------------------------------------CTTTTAGTTATCACC
TTGTTTTAGCTAATCTAAATATCGGTGTTTTTTTATGGATTGCCATTTCAAGTATTGCTCCGATTGGACTTCTTATGTCA
GGATATGGATCAAATAATAAATATTCCTTTT-------------------------------------------------
--------------------------------------------------------------------------------
--------------------------------------------------------AATAGATATTTTCATTTTTTATTT
ATCATTTTGTTTGATGAAC-------TAAATTAGATAGTTATATGAGTG----AAAAAAACTGCTGCTAAATTTGTAGTA
TACAAAATTGAGACTCATTT------------------------------------------------------------
--------------------------------------------------------------------------------
---------ATTCA--GTTTTCA-CTATTATTTCTATGTA----------TTAC--YATAATGCTAACGGGTGATTGA--
----------GCARAAACGAGTGGATGGTTAGGAACACCAAGATACACA-------------------------------
--------AAGGATTAGTAATA---------------------------------------------GAGATTAT-----
--------------------------------------------------------------------------------
--------------------------------------------------------------------------------
-----------------------------------------TA-------------------------------------
--------------------------------------------------------------------------------
--------------------------------------------------------------------------------
-----------TT-------------------------------------------------------------------
--------------------------------------------------------------------------------
--------------------------------------------------------------------------------
--------------------------------------------------------------------------------
--------------------------------------------------------------------------------
--------------------------------------------------------------------------------
--------------------------------------------------------------------------------
--------------------------------------------------------------------------------
--------------------------------------------------------------------------------
----------------------------------------------------CGGTTCTGTAATAGCGATGCAAACAGTG
ATGTTATCACCGACTATGATTATCTAACAGTTCAAGTACAGTTGATATAGTTGAAGCACAATCAAAATATGGTTTTTTGG
GGTGGAATTTGTGGCGTCAACCTATAGGGGTT--------------------CCCTAGCAGAATGTGAAAGACTACCTTT
TGATTTACCAGAAGCAGAAGAAGAATTAGTAGCAGGGTATCAAACCGAATACTCGGGTATCAAATTTGGTTTATTTTATG
TTGCTTCCTATCTAAACTTATTAGTTTCTTCATTATTTGTAACAGTTCTTTACTTGGGGGGTTGGAATATCTCTATTCCG
TA-----------------------------------------------------------------GAACAATGATTGG
TATCTTTATTACATTGGTTAAAACATATTTGTTCTTGTTCATT-------------------------------------
--------------------------AAATTTCTTTTACCTATTTCTCTTGGTAATCTATTATTAACAACCTCTTCTGAA
CTCCTTTCACTATAAGCACTCT-----------AAAGAAATCCTTT-TCTATATTCACAACTTGTCTG------AAACAA
GAG--------AAAGAAACAAAGATAAAACT-------------------------------------------------
--------------------------------------------------------------------------------
--------------------------------------------------------------------------------
--------------------------------------------------------------------------------
--------ATTGTTTAATTACAGTATTGATTTTGGAATCTGTATATTTTGTGGCAACTGTGTTGAGTATTGTCCAACAAA
TTGTTTATCAATGACTGAAGAATATGAGCTTTCTACTTATGATCGTCACGAATTAAATTATAATCAAATT----------
--------------------------------------------------------------------------------
---------------------------------------ATTA-----------------------AATGTAGAATAG--
-------TCTTTTTTCAT-------------------------------------TTTACTTGAGCAATAACTATAAAAA
CTACAA------GTGCTTAGTTGGTGAGAATCACATCGGGACTTAATTTGT-----------------------------
--------------------------------------------------------------------------------
--------------------------------------------------------------------------------
------ATAAAAAATTCGA-TTTTTTTATTTCTTATTTTACGTACAATGGA-TTTGCTTGGACCAATACATGATTTTATT
TTAGTCTTTCTGGGTTTAGGTCTTATATTAGGAGGTCTAGGAGTGGTATTACTTACTAATCCAATTTATTCTGCCTTTTC
GTTGGGATTGGTTCTTGTTTGTATATCTTTATTCTATATTTTATCAAACTCTCCTTTTGTAGCTGCCGCACAACT-----
--------------------------------------------------------------------------------
-------------------GGATTACCCTCTTAGTTTGTACAAGTATTTTTGTTTCACTAATTAGTATTGTTCTAGATAA
GTCATGGTACGGGATTATTTGGACTACAAGACCAAATCAGATTATAGAGCAAGAGTT-GATAAGTAATGGTCAACAAATT
GGAATTCATTTATCAACAGATTTTTTTCTTTCATTTGAATTTATTTCAATAATTCTTTTAGTTGCTTTGATAGGTGCGAT
TGTTGTGGCTCGTCAGTAAGAAA-TCTTTAKRATTAGAA-----ATTGGAATCAAAATGAAAC---------TTTTGTCT
ATGTTATTACATCCATTTTCCTTTAATTGTAT--------TTGAATAT-TATTCAT------------------------
GTATAAATTTGTTC-ATTCAATCTATTA-CCAATAGATTTTTTT-GTTCTGTACT--TGTGATATTGTTATTATAA----
--------------------------------------------------------------------------------
--------------------------------------------------------------------------------
--------------------------------------------------------------------------------
--------------------------------------------------------------------------------
--------------------------------------------------------------------------------
--------------------------------------------------------------------------------
--------------------------------------------------------------------------------
--------------------------------------------------------------------------------
--------------------------------------------------------------------------------
--------------------------------------------------------------------------------
--------------------------------------------------------------------------------
---------CACCCGAAGTATGGGTCTWGCTTATTGATACTTTCCAT-----AAAAAAACCACTTGAA-TACATTTGATT
TTTTGTTTACCGACAAAAACCTGTAATCGAAAAG-----ATAATATA-TTTGT------TATAATTTTCGATTACGGGTT
TTTCTGGTCCAAGTGTATCTTGTCTTTACCACGAA---------TTCTTTTCCTTGGTTAACATTATTTGTAGTTTTACC
GCTATCCGCAGGGTCTTTAATTTTTTTTTT-CCCTCATCGAGGAAATAAGGTTATTAAATG------------------T
TTATCCGAWCTTCTTTTAATGACCTATGCATTCTCTTTTTATTTCGAATTGGATGATCCATTAATTCAATTAACAGAGGA
TTTTAAATGGATAAATTTCTTTGATTTTTACT-GGAGATTGGGAATAGATGGACTTTCTCTAGGGCCGACTTTACTGACA
GGATTTATTACTACTTTAGCTACTTTAGCGGCTCGGCCAGTTACT-----------------------------------
--------------------------------------------------------------------------------
--------------------------------------------------------------------------------
----------------TAATGGGAGCTTTAGGTATTGCTTTATATGGTTCTACTGAACCAAC-ATTTAATTTTGAAACAT
CAGCAAATCAATCATATCCTGTGTCTTTGGAAATAATAT-CTATATTGGATTTCTTATTGCTTTTGCTGTCAAATCACYG
ATTATACCTTTCCATACATGGTTACCCGACACCCATGGGGAAGCACATTATAGTACTTGTATGCTTCTAGCCGGAATCCT
ATTAAAAATGGGAGCGTATGGGTTAATTCGAATCAATATGCAATTATTACCCCACGCTCATTCTAGATTTTCTCC-----
---------------------------TCTATGCAGCTTCAACATCTCCTGGTCAACGAAATTTAAAAAAAAAGAATAGC
CTATTCTTCTGTATCTCATATGGGTTTCATAATTATAGGAATTTGCTCTATAAGTGATATGGGACTTAATGGAGCCATTT
TACAAATAATATCACATGGATTTATTGGCGCTGTCTTTTTTTTCTTGGCAGGAACGAGTTATGATAGAATACGTCTCGTT
TATCTTGACGAAATGGGTGGAATGGCTAACCCAATGCCAAAAATATTTATGATGTTCAGTATCTTATCACTAGCCTCCCT
TGCAT------GCATGAGCGGTTTTTTTTCGGAATTGATAGTATTTCTTGGAATAATTACTAGTCAAAAATA-TCTTTTA
ATGCCAAAAATACTAATTACTTTTGGAATGGCAGTTGGAATGATATTAACTCCTATTTATTTATTATCTATGTCACGCCA
AATATTCTATGGATACAAGCTTCTTAATKGCACAAATTCTTCTTTTTTT----GATTCTGGGCCACGGGAGCTATTTGTT
TTAATTTCTATCCTTT----------------------------------------------------------------
--------------------------------------------------------------------------------
--------------------------------------------------------------------------------
----------------------------------------------------------------------C---------
--------------------------------------------------------------------------------
--------------------------------------------------------------------------------
--------------------------------------------------------------------------------
--------------------------------------------------------------------------------
--------------------------------------------------------------------------------
--------------------------------------------------------------------------------
-------------------------------------------------------------------------T------
---------------------------------------------------------------CCAAAATA-ACATATCC
AAATTATAAGAAAGCCGATAGAAGCGACAATTGCGGAATTAAAACCTTCCAAATTTTTCTTTGTTCGA----------AA
ATCGCGAATATAGTCCAAGTAATAAATGCCCAAG--TTTCCTTTGGATCCCAATTCCAATATGATCCC------------
--------------------------------------------------------------------------------
--------------------------------------------------------------------------------
--------------------------------------------------------------------------------
--------------------------------------------------------------------------------
--------------------------------------------------------------------------------
--------------------------------------------------------------------------------
--------------------------------------------------------------------------------
--------------------------------------------------------------------------------
--------------------------------------------------------------------------------
--------------------------------------------------------------------------------
-----------------------------------------------------------------CT-------------
-----------------TCT-----------------------------------------TGA----------------
--------------------------------------------------------------------------------
--------------------------------------------------------------------------------
---------------------TTTA-------------------------------------------------------
--------------------------------------------------------------------------------
--------------------------------------------------------------------------------
--------------------------------------------------------------------------------
--------------------------------------------------------------------------------
--------------------------------------------------------------------------------
--------------------------------------------------------------------------------
--------------------------------------------------------------------------------
-----------------------------------------------------------------------A--------
---A----------------------------------------------------------------------------
--------------------------------------------------------------------------------
--------------------------------------------------------------------------------
--------------------------------------------------------------------------------
---------------------------------------------------------TATGTGAATTATTTGGTAAA--G
ATTTAGAATAATT----------AAGAATAGCAAATTTTCTT--------TTAGTTT----TG---TATA-TCTTTAT--
------------------------CTTTT---------------------------------------------------
-------------------------------------T------------------------------------------
---------------------------------T-TTTCTTTAT------------------------------------
--------------------------------------------------------------------------------
-----------------------------TATAATTATGATTTTTTCGACCGATCTGTCTATTCAGCAAATAAACAGCTC
ATTTATCTATCAATATGTATGGTCTTGGACCATCAATAATGATT----TTTCTTTAGAGTTTGGACACTTGATCGAC---
-------------------------------------------------------WTAGTGACAATTATATGTTTCATGA
TCAAAGCTATTTGAGATTTTTTGCTTATATGAGTTTTTTCAATACTTCAATGTTGGGATTAGTTACTAGTTCTAATTTGA
TACAAATTTATATTTTTTGGGAATTGGTTGGAATGTGTTCTTATCWR---------------------------------
--------------------------------------------------------------------------------
--------------------------------------------------------------------------------
--------------------------------------------------------------------------------
------------------------------------------------------------------------------CT
TGTAGCTCGACTTTTACCTCTTTTCGTACTCATACCCTACATAATGAATCTAATAGTTTTGATAGGTATAATAACAGTAT
TTTTAGGAGCGACTTTAGCGCTTGCTCAAAGAGATATTAAGAGGAGTTTAGCCTATTCTACAATGTCTCAATTGGGTTAT
ACAATGTTAGCTCTAGGTATGGGGTCGTATCGAGCGGCTTTATTT-----------------------------------
--------------GATCCGTTATTCATTCAATGGAAGCTATTGTTGGTTATTCCCCAGATAAGAGCCAAAATATGGTTC
TTATGGGTGGCTTAACAAAACATGTTCCGATTACAAAAATTGCTTTTTTATTAGGAACCCTCTCTCTTTGTGGTATTCCG
CCCCTTGCCTGTTTTTGGTCCAAAGATGAAATTCTTAATGATATTT----------------------------------
--------------------------------------------------------------------------------
--------------------------------------------------------------------------------
--------------------------------------------------------------------------------
TTCCTTTTTT-CGGAAGAAGACATACCAAATTGATGGTAATGTAAGAAATATGACACATCCTTTTATTACTATTAAATCT
TTTGACAATAAGAGTACTTTCTCCTATCCTCACGAATCGGATAATA----------------------------------
--------------------------------------------------------------------------------
--------------------------------------------------------------------------------
--------------------------------------------------------------------------------
--------------------------------------------------------------------------------
--------------------------------------------------------------------------------
--------------AGTAATTGATGGACTTACTAATGGAATCGGAGTTACAAGTTTCTTTGTAGGAGAATGTATAAAATA
TATAGGAGGAGGTCGCATCTCTTCTTATCTCTTGTTCTATTCGTTTTATGT-AT------------------TAATC---
--------------------------------------------------------------------------------
------------------------------------------------------------------------TCTAAATC
ATAAGAATATAAAATTTCAAAAAATTGTTTATTTTTATAGTCTA-TCTCTTTTGTTTCGGAAGTTTTTTCTATTTCTACA
TCTGTTTC---------TTCCTCA------------------------CTT-----------------------------
--------------------------------------------------------------------------------
------CCATAAAATTTATCAATTCTGATACAAGGTWCTTATTAGATCGAATAAGTACA-----TTCGATTTAATAGAAT
GATTTTGCTGTATCCAGACTAATATCAATCCAACCCATTTCATGAATAAAATGTGACCAATTAACCAACCAACAAAACTA
CTTGTTACAAATAACATCTTGTTGTTGCATCGAAACATATAAATATTGACTAATCTGACTAACATTGAACTTGGTAAAAT
GAAATGGTTGAATAATTGAAAAATGAGATTATTCAGGAATACACATTGAAAGCTAAGATTACGC----------------
---------------AAAAGTGTTTGTGATTGTTCCAGAAGAAATGAAACAAAAGATACGGTAGAGCTAGGACAGTTATT
GTA--------------TGAGGTCTACCCAATG--------------CTAGATGCAGAGG---------CGCATAATAGA
TCGATATGAACATCATGAGCTGTCCCGTAATAAAACCTGTTGTTGCTGATACCTTCTTCTCGGTTCCTTCTTC-----TC
CTTCTTCTCTAACC---------CGAGCTCGGAGAAGGAAGAGATAAGAGGGCCCCATGGAGAATGTGGTAAGAAATCCA
TAATAGAGTCCGACCATAACGACCGA-------ATTGATTATCTTCATGCATAAGGATACTAGATTACCTAGTATAAAAG
ATTTCAAAATCATATCACAAACCCCCC-TTTTTCTTAT------------------------------------------
--------------------------------------------------------------------------------
--------------------------------------------------------------------------------
--------------------------------------------------------------------------------
----------------ATTGGTCATGGGTTAAGAACGGGAATTGAACTCTATGAGATCTAAT-CTCCCGTTGTTCCTCAG
TAGCTCAGTGGTAGAGCGGTCGGCTGTTAACTGACTGGTCGTAGGTTCGAATCCTACTT---------------------
--------------------------------------------------------------------------------
----------------------------------------------------------------------------TAGG
TAAGTCCGGTATAATCCTTTGTTCCATAGTCTGGGGCTATTTACAACTAGCCAATTAAGAATTTT-CAGATGTACTAGCA
AGTGCATCTTTGATGCAGTCATCGATTCTGCCGAGAGGCCCCAATTACCGCGAGCAAACATA-----TTAATGACGACGA
ACACATTTT-----TGCTATGCTACTAATACTTGCT----CTGCTATTCTGCCCAAGCCTGG------CTGAGGAA----
---GAGTTATGGGGCG-------------A--------------------------------------------------
--------------------------------------------------------------------------------
--------------------------------------------------------------------------------
-CCTACACCCAAGTTCCATAGCCTTGGATCCGCTATCCCGATCATGATTTTCCTACCTCCAGAGGGAGGGGTCCTTCCCT
-----TTTTGGCCGGTTGTGGGCGAGGAGGGATTCGAACCCCCGACACCGTGGTTCGTAGCCACGTGCTCTAATCCTC--
------AGGCCCCACCCTGTCTCCACTGGATCTGTTCCTGGGAGTACCCTAAAAAAGGAACCTTTCCTCTCCCCAGCCAT
TT------CGGGTT-AAGAAGATGCGAAAGCGCCTCTCTCTCTCTATAAGATAAGAACGGTGCGTTCCGAGGTGTGAAGT
GGGAGAGAAGAGATTTCATAATTGGGGTTTTG------AATG--------------------------------------
--------------------------------------------------------------------------------
--------------------------------------------------------------------------------
--------------------------------------------------------------------------------
-----------------------------------------------------GGGCAGAGCTTTTGGTTTTTTCATGTT
GTC---AAAGAGTTGAACAATAAAAATAGA--------------------------------------------------
--------------------------------------------------------------------------------
-----------------------------------------------------------------CCCGTCGCTGTCTCG
GCTGTGCTACCGGAGGCTCTGGGGAAGTCGGAATAGGAGAGCACTCATCTTGGGGTGGGCTTACTACTTAGATGCTTTCA
GCAGTTATCCGCTCCGCACTTGG---------------------------------------------------------
-----------CTAGGGAAAGGTCCTCTCAATGCTCTAACGCCCACACCGGATATGGACCGAACTGTCTCACGACGTTCT
GAACCCAGCTCACGTACCGCTTTAATGGGCGAACAGCCCAACCCTTGGAAC----------CCCAGGTGGCGAAGAGCCG
ACATCGAGGTGCCAAACCTTCCCG--------------------------------------------------------
--------------------------------------------------------------------------------
----------------------------------------------CCCGAGGAAACCTTTGCACGCCTCCGTTACCTTT
TGGGAGGCCTACGCCCCATAGAAACTGTCT--------------------------------------------------
--------------------------------------------------------------------------------
---------AAGGCCCAAAGCCAATCCCAGGGAACAGTGAAGCTTCATAGGGTCTTTCTGTCCAGGTGCAGGTAGTCCGC
ATCTTCACAGACATGTCTATTTCACCGAGCCTCTCTCCGAGACAGTGCCCAGATCGTTACGCCTTTCGT-----------
--------------------------------------------------------------------------------
--------------------------------------------------CAGCCCCCATACATGGTCTTACGACTTTGC
GGAGACCTGTGTTTTTGGTAAACAGTCGCCCGGGCCTGGTCACTGCGACCCCCTTTGTGAGGAGGCACCCCTTCTCCCGA
AGTTACGGGGCTATTTTGCCGAG--TTCCTTAGAGAG----------------------------------CCACCTGTG
TCGGTTTCGGGTACAGGTACCCTTTTGTTGAAGGTCGTTCTAGCTTTTCCTGGGAGTATGGCATGGGTTACTTCAACGCC
GTAGCGCCTGGTACTCGAACATTGGCTCGAGGCATTTT------------------------------------------
--------------------------------------------------------------------------------
-----------------------------------------------------------TGGACGAACCTTGCGGAGGAA
CCCTTAGGTTTTCGGGGCATTGGATTCTCACCAATGTTTGCGTTACTCAAGCCGACATTCTCGCTTCCGCTTCGTCCACC
CCTGCTCGCGCGGGTGCTTCCCTCTAAGGCGGAACGCTCCCCTACCGATGCATTTTTACATCCCACAGCTTCGG------
-------------------------------------------TGAGCTATTACGTACTCTTTCAAGGATGGCTGCTTCT
AGGCAAACCTCCTGACTGTCTCTGCACCCCTACCTCCTT-----------------------------------------
--------------------------------------------------------------------------------
-------------GTATTCAGAGTTTGCCTCGATTTGGTACCGCTCTCGCGGCCCGCACCGAAACAGTGCTTTACCCCTA
GATGTCCAGTCAACTGCTGCGCCTCAACGCATTTCGGGGAGAACCAGCTAGCTCTGGGTTCGAGTGGCATTT--------
------------------ATTCTTCAACATCAGTCGGTTCGGACCTCCACTTAGTTTCACCCAAGCTTCATCCTGGTCAT
GGATAGATCACCCAGGTTCGGGTCCATAAGCAGTGACAAT-----------TGACTCGCTTTCGCTACGGCTCCGGTGGG
TTCCCTTAACCAAGCCACTGCCTATGAGTCGCCGGCTCATTCTTC-----------------------------------
-----------------------------------------------------------------TTTTCMCCCTTCCCT
CACGGTACTACTTCGCTATCGGTCMCCCAGGAGTATTTAGCCTTGCAAGGTGGTCCTTGCTGATTCACACGGGATTCCAC
GTGCCCCATGCTACTCGGGTCA--------------------------------ACTCTCGCCATCTAGGGTGCAGCACT
CCACCGCTTCGCCTAGCAGCACGACGCTTGTATTGCTCTCCCACAACCCCGTTTTCAC--GGTTTAGGCTGCTCCCATTT
CGCTCGCCGCTACTACGGGAATCGCTTTTGCTTTCTTTTCCTCTGG-TTACTAAGATGTTTCAGTTCGCCAGGTTGTCTC
TTGCCTGCCCATGGATTCAGCAGCAGTTTGAAAGGTTGACCTATTMGGGAATCTCCGGATCTACGCTTATTTTCAACTCC
CCGAAGCATTT---------------------------------------------------------------------
--------------------------------------------------------------------------------
TGAATGATAAATCATAAATCGAACTACCGAATCGGAAAAATTGGGTGCTATCATATAGCTTTGTACCGGCTAAGTTCACG
AGTTGGAGATAAGCGGACTCGAACC-------------------------------------------------------
--------------------------------------------------------------------------------
--------------------------------------------------------------------------------
----------------------------------------TCCCATTCTAACTAAGGATTCTTGTGGTTCCGGAGGATCC
AACTACAGGAAAACCAGGAACGGAGAGCTTT----CCCCCCTTCCGCCCCACTCTTT-GGTCTTAAG-------------
---AATGCTGGTTTTAAGAATGAGTGATTGCCCTTCTCCGACCCTTACTGCCCAACCTGAGAGCGGAC-----AGCTAAT
GCCTTCCACTTATTGAACACGGTTCTATGGTCGGTCCGCGACCCCTGGATGCCGAAGGCGTCCTTGGGGTGATCTCGTAG
TTCCTACGGGGTGGAGACGATGGGGTCGGTCCATGGATTTTCCTTCCTTTTGCCGCATTTCGCTAAAGGGTTGAAGGGGG
ATAGTGCATCAAGCTGTTCGCAAGGGCCAACTTGATCCTCTTCCCCAGGAATCCCAGATGAGGGAACCCTAGGAGAGCCG
CCGACTCCAACTATCGTCCATGTACGATCCATACTAGATCTGACCAACTGCCCATCCTACCTCCTCTACGTTCTTGACAG
CCCATCTTTGTCTCAGTAGAGTCTTTCAGTGGCATGTTTCGGTCCTCTTCCCCATTACTTAGAAAG--------------
--------------------------------------------------------------------------------
--------------------------------------------------------------------------------
-------------------------------------------CCGTGAAGTAAATCATCGCACCTACGGTCCAACCAAT
TAGGAGAGAATCAATAGATTCCTTTTCGGGAGCGATTCATCCTTCC----------------------------------
--------------------------------------------------------------------------------
--------------------------------------------------------------------------------
--------------------------------------------------------------------------------
---------------------------------------------------------------TGCGGAAAGGAAAAAGA
ATTTCACG------------------------------------------------------------------------
--------------------------------------------------------------------------------
--------------------------------------------------------------------------------
--------------------------------------------------------------------------------
--------------------------------------------------------------------------------
--------------------------------------------------------------------------------
--------------------------------------------------------------------------------
---------------------CGCTCTACCACTGAGCTAATAGCCCGTCGTGCGGGCCTCTCGCCGGGG---GCCCGCTA
TGCCAAAAGCGAGAGAAACCCCA------TCCCTCTCTTTC---------------------------------------
--------------------------------------------------------------------------------
-----------------------------------------------------------------------TAGC-TCCC
TTCTTTTTGGGTGTGAAG----------CAGTGTCAAACCAAAATACCCAACAAGCATTATCTCTCCCTGAAAAGGAGGT
GATCCAGC------------------------------------------------------------------------
--------------------------------------------------------------------------------
-----------------------------------TCCGGCTTCATGCAGGCGAGTTGCAGCCTGCAATCCGAACTGAGG
ACGGGTTTTTGGAGTTAGCTCACCCTCGCGGGATCGCGACCCTTTGTCCCGGCCATTGTAGCACGTGTGTCGCCCAGGGC
ATAAGGGGCATGATGACTTGACGTCATCCT--------------------------------------------------
--------------------------------------------------------------------------------
----------------------------------------------GATTCGCGGCATGTCAAGCCCTGGTAAGGTTCTT
CGCTTTGCATCGAATTAAACCACATGCTCCACCGCTTGTGCGG-------------------------------------
--------------------------------------------------------------------------------
--------------------------------------------------------------------------------
--------------------------------------------------------------------------------
---------------GCCACCGCCTGTCCAGGGTTGAGCCCTGGGATTTGACGGCGGACTTAAAAAGCCACCTACAGACG
CTTTACGCCCAATCATTCCGGATAACGCTTGCATCCTCT-----------------------------------------
--------------------------------------------------------------------------------
---TCAGGCTTTCGCCCATTGCGGAAAATTCCCCACTGCTGCCTCCCGTAGGAGTCTGGGCCGTGTCTCAGTCCCAGTGT
GGCTGATCATCCTCTCGGA-------------------------------------------------------------
--------------------------------------------------------------------------------
--------------------------------------------------------------------------------
--------------------------------------------------------------------------------
--------------------------------------------------------------------------------
--------------------------------------------------------------------------------
------------------------------------------------------------------------CAGGCTCG
AWCTGATGACTTCCACCACGTCAAGGTGACACTCTACCGCTGAGTTATATCCCTTCCCTTGCCCCCATCGAGAAATAGAA
CTGACTAATCCTAAGGCAAAGGGTCGAGAAAC------------------------------------------------
--------------------------------------------------------------------------------
----------------------------------------CCCGATCTAAATAAAGCAGGTTTTACATGAAGAAAATTTG
GCTCAGCATGTTCTATTC--------------------GAAGACCCCGACTCGGTATTCTT---AAAAAAATAGAGAAAT
CAGAACCAAGTCAAGATGATACGTATCAACCCCTT-CTTCTTGCGCCAAAGATCTTACTATTTCCGAAGGAACTGGAGTT
ACATCTC------TTTTCCATTCAAGAGTTCTTATGTGTTTCCACGCCCCTTTGAGACCCCAAAAAATGGACAAATTCCT
TTTCTTAGGAACACATACAAGATTCGTCAC--------------------------------------------------
--------------------------------------------------------------------------------
--------------------------------------------------------------------------------
-----------------------------------------------------------------GTACAATCCTCTTCT
CGCTAAGCCCCTTTCCCCTCGGTCCACAGAGACAAAATGTAGGACTGGTGCCAACAGTTCATC---------------AC
GGAAGAAAG----GACTCACTGAGCCAGGATCACTAACTAATACTAATCTATTACTAATAGAAA------------ATAC
TAAT-------------ATAATAGATCGAATAGAAAAGAACTGTCTTT--------------------------------
--------------------------------------------------------------------------------
------------------ATCTTTCAGAAAATGGATTCCTATTCGAAGAGTGCATAACCGCATGGATAAGCTCACACTAA
CCCGTCAATTTGGGATCC-------AATTCRGGATTTTCCTTGGGAGGTGTCGGGAAGGAATTGGAATGTAATAATTATC
GATTCA-----TACAGAW--------------------------------------------------------------
---------------------------------ATAGCGAAAGAGGAAAAAACCGAAGATTTCACATAGTACTTTTGATC
GAAAAATCAATCTGATTTATTTCGTACCCTTCGCTCAATGAGAAAATGGGTCAGATTCTACAGGATCAAACCTATGGGAC
TTAAGGAATGACGGAAGGGAAT-AAAAAAGAAATAAATA-------------------AAAATGAAGTAGAAGAGCCCAG
ATTCCAAATGAACAA----------ATTAAAACTTG--------------AAAAAAAGCTTTCTGATTCTCGA-------
AGAATGAGGGGC--------------------------------------------------------------------
--------------------------------------------------------------------------------
-----------------------------------------------------------GTTACT-CTTCGGGACGGAGT
GGATGAAGGGAGGAGCTTCTCGAACGAGGAAAGGGA------TCCAATGACT-------------T--------------
--------------------------------------------------------------------------------
--------------------------------------------------------------------------------
---
>13_Brac_aren
--------------------------------------------------------------------------------
--------------------------------------------------------------------------------
--------------------------------------------------------------------------------
--------------------------------------------------------------------AACCCGTCAATT
-------TGGGATCCAATTCG---------GGATTTTCCTTGGGAG----------------------------------
--------------------------------------------------------------------------------
--------------------------------------------------------------------------------
---------------------------------------------AATCTAATTTA----------TTTCGTACCCTTCG
CTCAGTGAGAAAATGGGTCAGATTCTACAGGATCAAACCTATGRGACTTAAGGAATGACGGAAGGGAAT-AAAAAAGAAA
TAAATAAAA-----------------------------------------------------------------------
--------------------------------------------------------------------------------
--------------------------------------------------------------------------------
--------------------------------------------------------------------------------
--------------------------------------------------------------------------------
--------------------------------------------------------------------------------
---------------------AGTACGATTAACCTCGGGATTTGAAATCACTGCTTATATACCCGGTATTGGCCATAATT
TACAAGAGCATTCTGTAGTCTTAGTAAGAGGGGGAAGGGTTAAGGATTTACCCGGTGTGAGATATCACATTGTTCGAG--
------------------GTAAAGGATCGTCAACAAGGGCGTTCTAGTGCGTTGTAGATTCTTATCYAAGACTTGTATCA
TTTGATGATGC-CATGTGAATCGCTA--GAAACATGTAAAGTGTATGGCTAACCCAATAACGAAAG-------AGGGGAC
TGGAGCAGGCTA-CCATGAGACAAAAGATCT--------------ATTCGATTCGGAACTCTTATATGTCCAAGGTCCAA
TATTGGAAGAATTTCAGAGGTTTTCCTTGACTTTGTCCGTGTCAACAAACAATTCGAAATGCCTCGACTTTTTTAGAGCA
GGTCCGAGTCAAATAG----------------------------------------------------------------
----------------------------GGAAAAGTAGGGAAACGGATACTCAATTTAAAGTGAGTAAATAGAATTCCAT
ACTCAATCTCATAGATACATATAGAATTCTGTGGAAAGCCGTATTCGATGAAAGTAGTATATACGGCTTGGAGGGAGGTC
T-------------------------------------------------------------------------------
--------------------------------------------------------------------------------
--------------------------------------------------------------------------------
-TCTATCGAGCCATGAAAAAGATTCAACAAAAGACAGAAACAAATCCACTATCTGTTTTACGTCAAGCAATACGTGGAGT
AACTCCCGATATAGCAGTAAAAGCAAGACGTGTAGACGGATCGACTCATCAAGTTCCCATTGAAATAGGATC--------
-------ACTTGCCATTCGTTGGTTATTAGGGGCATCCCGAAAACGTCCGGGCCGAAATATGGCTTTCAAATTAAGTTCC
GAATTAGTGGATGCTGCCAAAGGGAGTGGCGATGCCATACGCAAAAAGGAAGAGACTCATAGAATGGCGGAGGCAAATAG
AGCTTTTGCGCATTTTCGTTAAT--ATGAACAGGATCTATATAGAC-----TCATGGAGCCATACATCTCGAT-------
-CGGAAAAGAATCAATAGAAAAAGAAAGAATCGGAATTGATCGCTATATTTC----------------------------
-----------------ATCAATTAAGCCCTCTCGGGGACTTGCTTAAGATAAGAATAAAAAAAA-GGTAAATACMATGG
AATAAGGTTTGATCCTATTTATGGGGATTC--------------------------------------------------
---------------------------------------------------------AATGAAAACTTCATTCTCGATTC
TACGAGAATTTTTATGAAAGCCTTTCATTTGCTTCTCTTCGATGGAAG--------------------------------
-----------------ATG-ATCGATTCAACTTCTGATCAAAAAGATATACCTTGGTTATATTTCATCTCTTCAACAAG
TTTAGTAATGAGTATAACGGCCCTATTGTTCCGATGGAGAGAAGAACCTATGATTAGCTTTTCGGGAAATTTCCAAACGA
ACAATTTCAACGAAATATTTCAATTTCTTATTTTACTATGTTCAACTCTATGTATTCCTCTATCCGTAGAGTACATTGAA
TGTACAGAAATGGCTATAACAGAGTTTCT------------------------AGGAGGAATGTTTTTATGCGGTGCTAA
CGATTTAATAACTAT-------------------------------------------------------------GATG
TACGGTCTAATGAGGCTACTATGAAATATTTACTCATGGGTGGGGCAAGCTCTTCTATTCTKRTTYATGGTTTCTCTTGG
CTATATGGTTCGTCCGGGGGAGAGATCGAGCTTCAAGAAATAGTGAATGGTCTTATCAATACACAAATGTATAACTCCCC
AGGAATTTCAATTGCGCTTATATTCATCACTGTAGGAATTGGGTTCAAGCTTTCCCTAGCCCCTTCTCATCAATGGACTC
CTGACGTATACGAAGGAGTGCGGTTCGTTCGAAAAATTCATACTTCTCT--ATCTATCTCTGAGATGCTTGGATTTTTCA
AAACTCCATGGACATGCAGAAGAGAAATGCTATCCGCACTCGGACCAAGACATAACTTTTACTTGTTCAAATAACAATTA
AGGTGAAGCAGCGTCAGGAACAACGAATCTCTTTATGATAAACAAGAT--------------------------------
--------------------------------------------------------CTACATAGTTGGTTCTCATCCTTC
AGAGACTACGAGTGTAATAGGAGCATC-----------------------------------------------------
--------------------------------------------------------------------------------
-----------------------------------------------------------------------AAGG-----
-----ATTCCTCGAAAAGTTAAGGATTAGTAATCCTTT------TTAGAAATCGAATGGATTCGGTCTTATACATACGCG
AGGAAGGTAATCAAAAAAGAAAGAAGATGAGTTCTTCTTTC-TTTTATCACTTAGGAGCCGTGCGAGATGAAAGTCTCAT
GCACGGT-------------------------------------------------------------------------
------------------------------------CTCGAATTTTCGATATTCCTTTTTATTTCTCATCAAACGAATGG
--------------------------------------------------------------------------------
--------------------------------------------TTGGAATCATTGTTGGAGACTCAAATGGTGGATATG
CAAGCATGATAACTTATATCTTCTTCTATAT-------------------------------------------------
-----------------------------AGGATTATACACGAAAGATCC-TTTTTTGGCTCTCTCTTTAGCCCTATGTC
TCTTATCACTA------------------------------KGAAAACTCCATTTATTCTGGTGTGGATGGCAGGCAGGC
CTATATTTCTTGGTTTCAATAGGAC-------------------------------------------------------
-ACTGGACGAAACCAAGAAATAACCCCTCACGTGCGAAATTATAGAAGATCCCCTTTAAGATCAAACAATTCCATCGAAT
TGAGTATGATTGTATGTGTAATAGCATCTACTATACCAGGAATATCAATGAACCCGATTATTGAAATTGCTCAAGATACC
CTTTTTTAGCTTCTAGAACCTATTTCTTAGTTCAAAATCCCTCTTACTAACTGGAATCAAAGAATTAGTAGATCTGTTCC
G-CCCAAAATGGGAATGGGCTAGGG-------------------------------------------------------
--------------------------------------------------------------------------------
------------------GT--------------------CATTCGAGCGTATCTAAATAGAT---ACTATCGTATCTAA
ATAGATA---CTATGTTTC---CATATG----------------------GATCCCTC----------------------
CGTCGTTACATTCCATTTAGGATTAGGAATAGGCGTAATCGGACCTGCTTTTTACATATA--------------------
--------------------------GGCGTCTATTGA-------------ATCGAGAA-------------ATGGGTTT
GA-------------TTGTTCA---TTTTTTTGCTATAATTTTTTG-------------CTATAATAT------------
-----------------A--------------GAAGGCA---------------TGTTCCGGATAATTCAAAT--AAGCA
ATTGGATGTCCGACTCGGGCCT-------ATATG--------ACATGAACGATCAATAGAAATACTCCAACACTCCACCT
TT---------GTCATATATTCCATACATCA-------------------------------------------------
------------------------------------------CTAAAGAGCGTGGAGGTTCGAGTCCTCTTCAAGGCATA
ATATTGAGAAT---------GCTCATTGAATTGG------AATAAGTTCGGCAGCGGATC-----ACGAAATCTTGGTGA
TCTTCTCTATCTAAT--GAATGGGGAGTCCGCTTTGA---AATCG-----------------------------------
--------------------------------------------------------------------------------
--------------------------------------------------------------------------------
--------------------------------------------------------------------------------
--------------------------------------------------------------------------------
----ACATTACATAGTCCGTTTTAGGGATTGGCGAC------------TTACCC---------ATTC-------------
---------AGTGACTTTGGCACTGGATGGT-CCC--AAAAAAA---------AATGGGTACTAT-CGGGTCGGGTGAAT
--------------------------------------------------------------------------------
--------------------------------------------------------------AACAAT-TAAAATTAGGC
CCGGTCAACT---------------GGAATGTGTATTATCCATATAGGGGATCTTCCAATTGAGAAG-----------AT
CCATCGACCTG-------AGACGAAG------------AGAAGGGTCTATCTATT--TTATTTAGTTA-TTCATTTAGTT
ATTCAGTTA-------AACCAATGATTCGTTATTGGAGCAGATAGCAACAACCACCATTTCATCCGACATACATATTTTT
GATTTTCCAATGGATTTACATCTTTCATTAAAGGAAA--TTTTTTGATGTAGTGAGTAATAGCTCTGGTTGCTCGCTGTT
CAA-GAATTCTTGTTTAGGCAGTTCATACCATCCATACATAGTGTTTTGATCTAAGATTTCAATTCTTCCATGTTTCAGC
AGTA----------------------------------------------------------------------------
--------------------------------------------------------------------------------
-ATGAATCCAATTTCATCCGGGAAAAGCCATCTTTTTCTCAACAATGCCTTTGTCATTTGATCCAATAGCGTTCCGTTAG
ATAGGAACAGATTTGATAAATACTGATAACTCTCGGATAGAGTATTAGAA------------------------------
-----------------------------------------CTTTTCTTGCGTATTCTTGATAAACCAGCGTTTATATAT
AGATGTAGGAGGATTGGTTTGGGAAGTAAGAAGCCCCTTTGACATCTCTTCATCTGCAAAGAATTCTTGATGTGAAAACA
------------------------------------------------GGTCCCAAATGAATTGGCTTATTCGAAAAAAG
CCTTGTTCTTTGGAAGATCTATCTCCTGT---------------------------------------------------
--------------------------------------------------------------------------------
--ATACAATCAAATAGAAAGCCCCAGGGGCGCCATATTCTAGGAGCCCAAACTA-------TGTGATTGAATAAAACCTC
CTCTATC-------TGTTGTG------GATCGAGGACTCCTTCTCCTTCCCCTTCTTCAAACTCCGATTCG------TAT
TTTTCATAGAGAAAT------CTCTGATCAAGGATAGAACAAGATCC------ATTTT----------------------
-----------------------TCACTCGATCATTATCAAACCGACTGCAATCTTTTTCTGTCCGTGARGATCCCACCA
GAGCGCCTTCTA----TAATAGGCCGTGAACTAGATCCGAATCATTTTCAACAAGTCAATAATAAGTGATCCCATTTTTT
TCATCGGGTCCGGGTAGAGACCAAAGGTCTTGAGCAACCAATCCGGCAGAACAACTCAAAAGATAAAGAAGT--------
--------------------------------------------------CCCCTTCATTACATGATTTCTTCTTCATAT
AGATAGATATAGGATCTACGGGGCAATTACTTAGAAATACATTTTGTGCAACAGCCCTTCCTATCTGATAGAAAAGGATC
CCATGATCCTGAACCGATCTTACCTGGGATCGCAAATCCCAAGTTTGTCT------------------------------
--------------------------------------------------------------------------------
--------------------------------------------------AATCCCCTAGTATATGAAAGAGTGAAAAAG
TGCTTTCGTTGTTKTGGAATAAGAAGCCTTCGTATCTTAATGCATGTATTTAATTTATTCGGAGCTATTAGAGCGGGATC
CACTTTTTGGGGAATATGAGTCGAAGCAATAACAAGAATATCTCTAGTGG-AACATCTTTCACAATCCCTGGAGAGATAG
TTCACTAATAGACCAAGGGATAAGTAA-----------------------------------------------------
----------------AATTCGAATTGAAGGGTGATAT------AAAATCGGTCTATTTCCGGCATCATATCCATAGTTA
GCGCATTCATCCTAGTTAGAAGC---------------------------------------------------------
--------------------------------------------------------------------------------
--------------------------------------------------------------------------------
--------------------------AGATGGGAAATGAAAACTATTCGCCCCACACGAGGTTTGTGAATAAGTGATTGT
CTGATAATGAGCAAGGAATATCCGTCTTTCGGCTAAACAG----------------------------------------
----------------------------------------------------------GTTGTTCTTTGATAAATGATCA
CTATGAGTCAGACTCAATAGAATTTGATCAATCC-TTTTTTCTGTCGTTAAGGTGGAGAACTGAACCAAGAATTCTCTTT
CTTTATCATCAATTGAATCACTGTTCGCGACCAAGGATTCTATTTTATCATCAATCCAATCACCGTTCACGTTTTTTCTT
TTTCTTATCMATGAATAAATCTCTTTWCTTGTATGACTTAGATGTCTCGTATTTCTCGAAAAAGTAATTCGATTGATGGG
AT-TTGGTATGATACTTATGAGATCGATGAGATTGATATTCAAAAATTGCTTCTTAGAACGTATTGATTTGACCCCATAA
GCGGGACCACCACCCCATAGCATGTTGCCGCCAGAAGCAGAACCCCGTATTTCTTCTAGAAAATCTCCTAATTGTTCCAG
AGCAACTAGAAAGAGATTCTTTAACCAGAAAGAATTCAGTTCAGATGTAGGATACCTATCCAGAAGTTTTCGCAACTCAA
TCATGTATGATGGAATCATCAAAGATTTGACCTTTTCGAACTCTGTCTGTAACTCACTAGAGGCTCGGGAAA--------
-CAAAGAGAAGATGTGTACGAACGAGATATCCAGCAACAAGAAGAAGGAAAAGGATTGAATAGAGGAACTCCC-------
---GAACGTTTGRCGATCTCAGATGTGTCGATRTCAATGGTGACTCATTATTTCGATGAATCATTTCTTCGGA------A
AGATTATGTAAACACTTACTCGAAATCTCGCTTATCAGATTCCATTGTGGAAGACACAATTTTTTCTGAAGAATTCGCCA
TGATATATCTAATCCATGCATAATATCATGAAAAATGGATACAAATTTTTGACTGCTACTTAGTATCGGTAATAGGTCTG
AAAAGGTATCTAAAAATATCAAATTTAGATATTTGTACCCTGTCGA--------ACCATGGCA---------TATATGTT
TGGAATAGATTCCATTTTGAGAGAGTTGAAAAAGCACTATCTCGTTGAAAGGTTCTATACATCTGCCCTTTTTCAACGCA
TTTCTTTAGACAAAGACT--CCGTTTTTTCCTCTTTTCGGATGGTAAATCTT---------TCTCAGAACATGGAGTGTG
AATCAAACCCATGTTTGAAT--------------------------------------------------------GAAA
GAGGTTGACAATAAGKTCTTTCAAAATTGACTATTT--------------------------------------------
-----------------------GGATCGAATTGGAAAATGGAAAGATTTGTACAAGTTATACCTTTCGTCACCACTTCG
TGGAAAATCATTAGGTATGAATATGTTAGATACCTGTGACTCGATTKGTGAAATAGTATCTCTCTCCAAAAA------AG
CATG---------------------------AAGAGAATATTTTGTTGCGAATGAAC-AAGATATTGAGGAATTGTC-CA
TACGTAAAATCATAATTCT--TGATACGGGCCTTTTCCACATAAAAAGGGAATCTTTTGTTACAATAGAAGCAGAAGTGA
TGTAGATTATTCAAGAATCGAAGTCGATTTGCTTTATAAAAAGAAGATATCAATGAACTTCTATGAAATGGTTTTACGGG
ATTCAGCCAATTGTCTTGATCGTGGGATATCA---------TTGAGAAATAGGAATCCGTGTT-----------------
--------ATCAAAAGATTTCC----------------------------------------------------------
--------------------------------------------------------------------------------
--------------------------------------------------------------------------------
--------------------------------------------------------------TT----------------
--------------------------------------------------------------------------------
---------------------------AATC----AGCAATGGTTTCAAGGTCATACACCAACCTCTTAGATCTGGCGTC
TGGTAATGTTCCAAATTTTGGCCGGGAAAGGAAGAGGTTACCTCGAGTTGCAACTGTTGCGGGCGTTTTGTCTGAGCTGG
ATGATGAAACATGCAATAGTGTTGGCTCTGATGCTCCTTCATCGGTATCACAAGAGCGGATTATCATTGTGGGTAACCAG
CTTCCCCTTCGGTCCCATCGAAATCCAGATGGCAGTGGAGAATGGTGCTTTAGCTGGGA--TGAGGACTCACTTCTTTTG
CAACTTAAAGATGGCCTGGGAGAGGATGTTGAAGTCATCTATGTCGGCTGTCTCAAAGAAGAGATCGACGCTAGTGAGCA
AGATGATGTAGCACAAATACTGCTTGAGGTTTTCAAATGTGTTCCTGCTTTTATACCTCCGGACCTTTTCACTAAGTTCT
ACCATGGCTTCTGCAAGCAGCATCTCTGGCCTTTATTTCACTACATGCTTCCTCTATCACCTGATCTTGGTGGCCGCTTT
GATCGGTCCCTTTGGCAGGCTTATGTTTCTGTCAACAAAATATTTGCAGACAAATTAATGGAAGTAATCAGCCCTGATGA
TGATTATGTG----------------------TGGGTTCATGACTACCATCTCATGGTTTTGCCAACATTC---------
-------------TTGAGGAAAAG-------R-------------------------TTCAA----TAGAG-----TGAA
---------------A--------------------CTAGGGTT---CTTCCTCCACAGTCCATTTCCTTCA--------
--------------------------------------------------------------------------------
--------------------------------------------------------------------------------
--------------------------------------------------------------------------------
--------------------------------------------------------------------------------
--------------------------------------------------------------------------------
--------------------------------------------------------------------------------
-----------------------------------------------------------------------------GGA
CTC-----------CTTTGTTTTGTGCT---------------------TT-----------------------------
--------------------------ACCGGG-TAA--------------------------GGTATACCA------AGA
AAAGCC-------------TATTTGACAATGTTACCAATGAAAGGTGTCAAAG---------------------------
-------------------------ATCCTCATTTTTCCA--------ACTC-G-------AGCTTACCAATA-------
--AATACAGTAA-------GTCGTTCCT-------------AAACCCGTGTAACTDAACTA-GTGGATTCGATTTTGATT
GGGTTAGATTGGAGC--TTTTTTTTTTAACCG---TTATGAT----TTTGGC-----------------TCCAAAAATTC
ATTAGGTTTAGGTAGGTATTTCAAAGG--CGAAGAAAAGAAGTATCACTAACTT--------------------------
---------------------TTTGATTG---------------------------------------------------
-------------------------------------------------CCGAAAGGAAAGGAGGCA-------------
--------AATTCATATGTAATTGACCTACAAAGAGTAATGAAGAAAATTTGGTTTGTTTAGACAAGATTAAAAA---AA
ATACTGATTGGATCTATTGAAATGCGC-TTTTTTGTTTCAGCTTTAT---------------------------------
--------------------------GCTCGGCCCTGAATGATTCCTATAAGTAGAA--TGC-TTTTTCTTTT-------
TCGATG-AATC-AAGC-AAGCACAAGCGGCTAG-TTCTAAACAA--------CAAAGAATACAATAATGAA-------GA
ACT------------------GAAAAMTATACAATTTWYWW-----TTYWT------TTTTT---CATTTTTTTTTAGGG
CTATACGGACTCGAACCGTAG-----------------------------------------------------------
-------------TTTTTTGTTTTTTGCATTGAGCTCTTTCATTAACTG-ATAGAAATAATCGGTTAGWCTACCATAGTT
CTCTTGACAGAAAGATAAGAAGATGGCTCCATGTGCTCTGATTTATTATGGATTCCGATCCGAGAGCACTACCAAAGTGT
TTCAAAG-AAGGGTTATCC-------------------------------------TCAACCTAAGTTAAATGGA-----
------GTCTCCAT---CG-CCCCGCTTCT---GC-----TTAAAG-AATCAAA-----------TA-------TGAAAC
TTCATACAC---------CTTAAAGTTCATAGGGATAGGATAGGACGAAAAGAGAATTTTT-TGAA------ATCCTTAT
AC-----------------------------------CCTTATCAA-----TATCTTA-----AATCAATA-A------T
GGGTTCTCTTGAGTGCTG---AAAAGAG---------------------------------GGCTATTGTT---CTCTTG
TTCCCTAAAAGT--------CATGGAGT--------AAGACATCAACTTCTGAATAAGTCTT-------TTAATTATATG
AT----ATACTTCTTTG---------AAAAACATTGACGCGCGTGTAAACGAGGTGCTCTACCTAACTGAGCTATAGCCC
TTGTA-------CTTATGATACACATTTTATCATGTCGATAATTTCTTGTCAAG-------------------------A
TCCTATTTCTTTGATCTGGTTGTTTGGTA--TTGCTTATAAATAATATTCGATTTATA----ATCGATAGATGGGACAGG
CTACT---------------------------------------------------------------------------
--------------------------------------------------------------------------------
--------------------------------------------------------------------------------
--------------------------------------------------------------------------------
--------------------------------------------------------------------------------
--------------------------------------------------------------------------------
-----------------------------------------------------------------------------GGA
TCAATGTCACTACCCCTCTCCGCATCATTTACTAAAACAGTAATCTCATTATTGCCTATTCTAGCAAAACCACCCATCAG
AGCCATCGTTAACCATTCGTCGTTAAGGCGTATTCTCAAAATACCGATATCGACAGCAGTGGCAATAGGTGCGTGATTTG
RTAATACGCCAATTTGTCCRCTATTAGTAGATAAAATGATTTCTTTAACTTCTGAATCCCAAACAATTCGATT-------
--------------------------------------------------------------------------------
------------------------------------------------------------GATCAATTTAAAGCCTCTAA
TTGTTTCCACTAGACCGACATATTTTCCCGGAGAACCGGTAAATACTTCTGCTACAAAAAAGGGTTGTGA-TAAGAAACG
CTCAATTTTTCGTGCTCTTGCTACAGTTAAGCGATCCTCTTCGGACAATTCGTCCA-ACCCAAGGATAGCTATAATGTCC
TGAAGTTCTTTGTAACGTTGTAAAGTTTGCTTAACTCTTTGCGCAGTTTCATAATGTTCTTCACCAACGATCTGAGGTTG
GAGCATAGTTGACGTTGAATCTAAARGATCCAC-----------------------------------------------
--------------------------------------------------------------------------------
----------------------------------------------------------------------------CCCA
CAGCAGAAGGCATTCTGCCCAATAAGGCGGATAC------------------GAAACGGAAGATATTGTCGATAAATAGA
AGCACGTCTTGTT-------------------------------------------------------------------
--------------------------------------------------------------------------------
--------------------------------------CCTACTCCGCCAAATACGGATACACCCCCGTGAGCTTTCGCA
ATGTTGTTGATTAATTCCATAATTAGTACTGTTTTCCCCACTCCAGCCCCCCCGAATAGTCCGATTTTTCCTCCGCGTCG
ATAAGGGGCTAAAAGATCTACTACTTTAATTCCGGTTTCAAAAATAGATAATTTTGTATCTAACTGGATAAA---GGCAG
GCACAGATCTATGAATAGGGG----------------------------AATCATCAATAGGTTCTCCAAGCACATTGAA
AAKTCGTCCTAGAGTCGCCCCGCSGACTGGAACACTTAGAGGAGCTCCTGTGTCAATCACTTCTATTCCTCTCATTAGAC
CATCTGTAGCACTCATAGCTACAGCGCGAACTCGATTATTTCCTAATAATTGCTGTACTTCACAAGTCACATTAATTTGT
TGACCGGCAGTATCT-------------CCAGCGCGTTGTAAATATTAGGCATCTTGCCCGG-GGGAAAAGTTACATCTA
GCACCGGGCCAATGATTTGAGCGATACGCCCCAAGTTCTTTTTTT-CAAGCGTGGAAACTCCAGGGTCAGAAGTAGTAGG
ATTGATTCTCATAATAGTATCGAA-------------------------------------------TTCGAATCT----
--------------------------------------------------------------------------------
-----------------------------------TTTAATTGTTTACTTA---------TTTTCAA----------TTT
CAATGAGTGA--ATTTTCAA---------------GTTCAACTAACT--------------CATTT--------------
----TCAAAACAAAATAGAAAT-------ATCAAAATAGA---------------GATATTAAGT-------------GA
--------------AAAGGGCTTCAGGAAG------CTTTTCATTTGTC------TATCATTATAAACAATACTA-TCT-
--------AT-TTATGGAATTCGAACCTGAAC-----TCTATTTAT-GATTCATTATTTCTATCTCATAAGTAC----TC
TTTTCTTATTTAAACAGATCTAGTTACGCCTAGTT-ATTA-------TTTTCTTTTTTTCCTAAACGAATTCCGCGGATT
TG------------------------------------------------------------------------------
--------------------------------------------------------------------------------
-----------------------------------------------ATCTAATG-------TCTAAT------AACGAA
ATTATGATTAGTTGATA-----A-TA-TTGGTTAATAATTTTGTGAAAGATTCCTGTG-AAAG------G-----GTTCA
TTCACTCCTAATTCATGTCGAGTAGACCTTGTTGCTGTGAGAATTCTTAATTCATGAGTT--------------------
-------------------------------TCAAGGCTGGTGTTAAAGATTATAAATTGACTTATTATACTCCTGACTA
TGAAACCAAAGATACTGATATCTTGGCAGCATTCCGAGTAACTCCTCAACCTGGAGTTCCG-------------------
--------------------------------------------------------------------------------
------------------------------------------------GCTTATGTAGCTTACCCTTTAGACCTTTTTGA
AGAAGGTTCTGTTACTAACATGTTTACTTCCATTGTGGGTAATGTATTTGGGTTCAAAGCCCTACGCGCTCTACG-----
--------------------------------------------------------------------------------
-------------------------------------------------------TCCGCTAAAAATTACGGTAGAGCTG
TTTATGAATGTCTCCGCGGTGGACTTGATTTTACCAAAGATGATGAGAATGTGAACTCCCAACCATTTATGCGTTGGAGA
GACCGTTTCCTATTTTGTGCCGAAGCACTTTATAAAGCCCAGGCGGAAACGGGTGAAATCAAAGGACATTATTTAAATGC
TACTGCGGGTACATGCGAAGAAATGATGAAAAGGGCTATATTTGCCAGAGAATTGGGAGTTCCTATCGTAATGCATGACT
ACTTAACAGGAGGAT-----------------------------------------------------------------
------------------------CAGAAGAATCATGGTATGCACTTTCGTGTACTAGCTAAGGCGTTACGTATGTCTGG
TGGAGATCATATTCACGCTGGTACCGTAGTAGGTAAACTTGAAGGGGAAAGAGAAATCACTTTGGGCTTTGTTGATTTAC
TGCGCGATGATTTTATTGAAAAAGATCGAAGTCGCGGTATTTATTTCACTCAAGACTGGGTCTCTCTACCAGGTGTTCTG
CCCGTGGCTTCAGGAGGTATTCACGTTTGGCATATGCCTGCTCTGACCGAGATCTTTGGAGATGATGCCGTACTACAATT
TGGTGGAGGAACTT-TAGGGCACCCTTGGGGAAATGCACCCGGTGCTGTAGCTAATCGAGTAGCTCTAGAAGCATGTGTA
AAAG----------------------------------------------------------------------------
--------------------------------AA----------------------------------------------
--------------------------------------------------------------------------------
--------------------------------------------------------------------------------
--------------------------------------------------------------------------------
--------------------------------AAATAAAAAGG-------------------TCCTATTGTATAT-----
------------ATTTTTG-----TATATATTTTT---TATATTTTTGATAGAT-----------TAGATATACAATAT-
--------------------------------------------------------------------------------
----------------GCTTATTGACTCAAACCTTTCTATTTTTGTCTTGGATCCACACTTAATCCTAAGGATCTATAGG
ATTGATGTATTC-------TTTTATA-------TCT-ATA----------------------------------------
------------------CACA----ACTTTGTCGACC-CATCCTGTA-----TATTGTCCTTTTCGTTCCTTATCCGTA
TT--GGAATAGAAACGTATT-----------------------AA--------------------------TAGGCGAG-
--------------------------------------------------------------------------------
--------------------------------------------------------------------------------
--------------------------------------------------------------------------------
--------------------------------------------------------------------------------
--------------------------------------------------------------------------------
--------------------------------------------------------------------------------
--------------------------------------------------------------------------------
------------------------------------------------------------------------------A-
--------------------------------------------------------------------------------
--------------------------------------------------------------------------------
--------TG----------------------------------------------------------------------
------------------------------CTAAATAAATCAATGGATAATATTGGTCCTCTTGAAAATACC---AGTAT
AAGTGAGGACC-C-----------------TAT------TATAA------------------ATAAGACAGATAAAATAA
ATAAGACAGATAAAAACACCTATAATTGGAGTAATA--GTAAGAGTTCTAGTTATTGTAATGTTGATCATTTAGTCAACA
TTAGGGACA-TTCGGAATTTCCGTGCGGATGACACGTTTTNCGTTAGGGATAATAATAGGAACAGTTATTCGATATATAT
TGATAATCCAATTTTTAAGATGAACAATGATCGTTCTTTTCTGAGTGAACCAGAAAG------CTCTTTTTATATTTATT
GGAATG---------------------------GGGGAC---GGCCACTAT------GATCATTATATG------TATGA
TACTAAATATAG--TTGGAATAATTACATCAATAGTTGCATTGACAGTTATCTTCATTCTCAAATCTGTATTGATGGTTC
TATTTTAAATGCTAGTGACAATTACACCGAAAGTTACATTTATAGTTCTATTTGTGGTGAAACTGGAAATAGGAGTGAAA
ACGAGAGTTCCGGTCT------AAGAAGAAAAACGAATGGCAGCGATTTAACTAGAAAA-GAAAGTTCTAATGATCGCGA
TGTCGCTCAAAAATACAGGCATTTGTGGATTCAATGTGAAATTTGTTATGCATTAAATTATA-----AAAAAAATTTTAA
GTCAAGAATGAATATTTGTGAACAATGTGGATATCATTTGAAAATGAGTAGTTCAGATAGAATTGAATTTTCGATTGATC
CAGGTACTTGGAATCCTATGGATGAAGACATGGTATCCCTGGATCCCATTGGATTTCATTCGGAGGAGGAACCTTATAAA
GATCGTATTGATTCTTATCAAAGAAAGACAGGATTAACCGAGGCTGTTCAAACAGGCACAGGTCAACTAAACGGAA----
----------GGGGTTATGGATTTCCAGTTTATGGGGGGTAGTATGGGATCCGTAGTAGGCGAGAAAATTACTCGTTTGG
TCGAGTAT------------------CCTCTTATTCTAGTGTGTGCTTCTGGAGGAGCTCGCATGCAAGAGGGTAGTTTG
AGCTTGATGCAAATGGCTAAAATTTCTTCCGCTTTATATGATTATCAATCTAATAAAAAGTTATTTTATGTATCAAT---
-------------------------------------------------------------------CCCAATGCTTACA
TTGCGTTTGCGGGTAAAAGAGTAATTGAACAAACATTGAATAAGACAGTACCTGAAGGTTCCCAAGCGGCTGAATTTTTA
TTCCATAAAGGCTTATTTGATCCAATCGTACCACGTAATCTTTTAAAAGGGGTTCTGAATGAGTTATTTCAGCTCCACGC
TTTTTT-TCCTTTGAATTCTA-------------AATAAAATAAATAAATAAAG-TAAAGTAGA-GC-------------
TTAACTTAA------------TTA-ATTCTAAAGTRG-----------T----------------TTAATTAGAAATAAG
TTAACT------AATTAT----TTGAGTTC-------------------GGCCGAAC---------------A------A
GTATTTATCGAAATCAAAGGAAA-----AA----------TCTGAAGAATGCA--------TTTTTTTTTGACAGA----
--------------AGAGTAAATTGTAGAAAGTA----------------------------------------------
-----------------------------------------ATACTAATTAGGCAACCTCTAT------CGACAAAACAA
G-AGAAAGGA-GTGCATTTTTTCT---TATGCGAAA-------TTGAATTTACAAGG-------TAAATAATAAATAAAA
CCAATTTCATGT------TCTTACCTCTGTATAGAAAAG-----------------------------------------
--------------------------------------------------------------------------------
-----------------------------------------------------------GCACTTTTTCAGAA------A
TTTCTAAG--CGGAAGAA---------------------------GTTCTT-----------------------------
--------------------------TCYTATTAAAGTTATAAG------------------------------------
-----------------------ACAA-GAAAAAGATAATAA--AAGAAGAATGAGAACTAAGTGGGTT-----------
--------------------------------------------------------------------------------
--------------------------------------------------------------------------------
--------------------------------------------------------------------------------
--------------------------------------------------------------------------------
-----------------AATCGAGGTG-CCCATTCTATGACAATTCTCAACGACTTACCCCCTATTTTTGTGCCTTTAGT
GGGCTTAGTATTTCCGGCAATTGCAATGGCTTCT----------------------------------------------
--------------------------------------------------------------------------------
--------------------------------------------------------------------------------
--------------------------------------------------------------------------------
--------------------------------------------------------------------------------
--------------------------------------------------------------------------------
--------------------------------------------------------------------------------
--------------------------------------------------------------------------------
--------------------------------------------------------------------------------
----------------------------------------------------------------------------TTCA
------TTTGGGCTAGTCTCCC----------------------------------------------------------
--------------------------------------------------------------------------------
-ACTTCCAATAA------AAT-TAACTGGATCTAGTATGAGTTGGCGATCAGAACGTATATGGATAGAACTTATAGCGGG
ATCTCGAAAAACAAGTAATTTTTTCTGTGCCTTTATACTTTTTTTAGGTTCCTTGGGTTTTTTATTGGTTGGAATTTCCA
GTTATCTTGGCAGAAATTTAATATCTTTATTTCCGTATCAGCAAATAATTTTTTTCCCACAAGGAATGGTGATGTCTTTC
TA-TGGCATTGCCGGTCTATTTATTAG-----------------------------------------------------
--------------------------------------------------------------------------------
----------------------------------------GGTATTTATGCTCGGCGTGTCCTT------TATATGGAAA
TCAGAGGGCAGGGGACCATTCCTTTGACTCGTACTGATGAGAATTTGACTCCACGAGAAATGGAGCAAAAAGCGGCTGAA
TTGGCC---------------------------------------------------------------TATTTCTTGCG
TGTAC--CAATTGAAGTATT------------------------------------------------------------
TTTTTTTT-TTCA------ATCGACGTTTCTTTTTA--------TCTGTGCTCT----------TTAATGAGCGTTGGAC
CAGTTCGAA------------TGATAACTTT--TCTGTTTTATTTGG-CTTTTACCGCTC----A-----TTTTTGATCA
TC---ACAATATTCTTTCAGAAATCTATCTCACTTATTCCTG-----TGGAATATCGGCAGTTGA---------------
----------------------------CCAA--------TTTTGTTTTCAAAATATTTTAGATTTTGATACAAA-GGAA
TTCTT---------------------------------------------------------------------------
------------------------------------------------TGAGATATCTGGAAAGAATAGGAATTTTTTGT
TTCTTCATTCGTCTTTCTTAGGTCA----------------------------TTTCTGTATTCTTTCTAAATTCAAGAA
TTAC-CCACTGATTCACATATAAACAAATAAAAAA-GAACTAGCTT------CATAGG-TTCGAAAGGGTCC--------
----------CTTATGCTTGATAGAAATATTCGATCATATAGAGTCGACGGATGGGATCGGTTCATTAA----AAATTCA
CAGACAACAAAATG---A-AAAAAAAAACATTTATTCCCCTTCTATATCTTATATCTATAACCCTTTTGCCCTGGTGTAT
CTCTTTTTCATTTAATAAAAGTCTGGAATCTTGGATTATTAATTGGTGGAATACTAATAAATATGAAACTTTTTT-AAAT
GATATTCACGAAAAGGGTATTCTAAAAAAATTCATAGAATTAGAGGAACT------------------GATAAAAGAATA
CCCCGAAACGCATCTACAAAAGTTT---------CCTATCGCAGTCCACAAAGAAACAATCCAATTGCTCAAGATGCATA
ATGAGCAGCGTATCCATACAATTTTGCACTTCTCGACAAATATAATCTCTTTCGTTATTCTAAGTGTTTATTCTATTCTA
GGTAATGAAGAACTTATTATTCTTAATTCT--GGTTCAAGAATTCCTATATAACTTAAGTGACACAATAAAAGCTTTTTC
TATTCTTTTATTAACCGATGT-----------------------------------------------------------
--------------------------------------------------------------------------------
--------------------------------------------------------------------------------
--------------------------------------------------------------------------------
----------------------------------------------------AATTTT----------TTTCGATA----
---------CATTCAAAAGATTCGGATT---------TTTCT-------------TAT-------ATTTTAG-AAAAATT
TTTCAGTAAATAGCAGCATCGTGGATAGGGAACTATACTAGTAAYCTACCTAATTTTATTGTAGAAATTTTCGGGATCAA
CG-TTGGATCATGCAAACTAGAAGGACCCTTTC---TTGGATAAAGGAAGAGATTACCCGCTCCATTTCCGTATCGCTCA
TGATATATATAATCACTCAGGCATCCA------------------------CACAGCAGGGTTATGAAAATCCACGCGAA
GCAACTGGCCGTATTGTATGCGC------------AGCTAATAAGCCCGTGGATATTGAGGTTCCACAAGCGGTACTTCC
TGATACTGTATTTGAAGCAGTTGTTCGAATTCCTTATGATATGCAACTGAAACAAGTTCTTGCTAATGGCAAAAAAGGAA
CTTTAAATGTAGGAGCTGTCCTTATTTTACCCGAAGGGTTTGAATTAGCCCCTC--------------------------
--------------------------------------------------------------------------------
---------TGAAATCAMCTTTCCTATTCTTTCTCCGAGCCCTGCTACTAGTAAGAATATTCACTTCTTAAAATATCCCA
TATACGTAGGAGGAAACAGGGGAAGGGGGCAGATTTATCCCGACGGGAGCAAGAGTAATAATACGGTTTATAATGCTACC
GCAGCAGGTATAGTAAG-----------------------------------------------------CAGAGGGACG
TCAAGTGATTGATATTATACCTCCAGGACCAGAACTTCTTGTTTCAGAAGGCGA--------------------------
---------------------------------------------TAGTATTTCAAGACCCATTACGGGTTCAAGGCCTT
TTGTTTTTCTTGGCATCTGTTATTTTGGCACAAWTCTTTTTAGTTCTT--------------------------------
----------------------------------------------------------------------GGCAATTATG
TATGATCAAATTTTGACAAGCC-----TTTTTCT---TTTCTTTCTAC--------------------------------
--------------------------------------------------------TT--GTAAAGGCTATTTTACTTTA
---TCCCTTCT-----TTTGGTCTT------TTTTAATCTAAATGGAAGCGGTCTGATTCTGTTACTATTGTCAGATTTC
ATAGAATGTATCATTTTTCTAA---------------------------------TTCTTAGTCGTCGGCACAAGAAAGG
GATTT-----TCTTGTGTCGAAATAATAATGATTCTTGATCTCATTTGTCAAAGATCCCTATTCTTAGTTTCTA-TC---
---------TA-TTTTTTCCAGGTTTATC--------ATAATATCATATCCCTTTCGAT---------------------
------------------------TTGAATT----------TAT-TTATTACGTATA------AAAACGTATAAAAAGTT
---AAAA----------CCTAGTGGACAAAAAAAAAAGAAAGAGAAAATT------------------------------
--------------------------------------------------------------------------------
--------------------------------------------------------------TATT--------------
-------------------------AGTAT-----------------------------------------------AGA
AAAAT-TGGCATTCTATC--GGATCGACCGAAACAAAATATATAACATAAAGT-------AA------------------
------------------------------ATAGCTTTTTTC------------------------TTATAACTTT--GA
AAGTAGTGATAGATACTAT-----------------CGAGGAACAACTGTTTTGAGTCAATTAATGAAGTTACTTTTTCA
AAAGCATCATCCAG--------AAAAAATTGGATGGAG-TTTTT------------------------------------
-----------------------------------------------------------TGAACTCTTACGCTTTCATGT
CTACACTGCAGTTTATCCGATTATTACAGGGACGAACCCAATCCGGAATATGAACCATAAAAG-----------------
--------------------------CTATTATCCAAAGAGGAATCCTTCCAGTAGTATCGGCCATTTCTCTTACTTTCC
TCCA-----CAT---TGAATCAAGTGGTCATGCTAGAGACCTAAAC----------------------------------
--------------AAGAGAATTTCTACTCT--TATTTATTATTCTACTA----TTCTCTTTAGCTTCTATTAATTGAAG
AAATAATTA-----------------------------------------------------------------------
--------------------------------------------------------------------------------
--------------------------------------------------------------------------------
----------------------------------------------------------------------GCCAGTTATT
AATGGAATTCCTTGTCGGCTCTCTGTAAAATATTCATTTGGGCGAGTGCTTCCAAAGA-----------AAACCCGTGCT
TACGAATAACCAACCTGCAATGAATAGGGAAGGTATAGTAATGCTATGAATGA--------------CTGGTAATAATAT
CAGCAAACGAACGTTCTCCTGTGCTTCCAGACATGCTGAGCTCCATATATTCTTGTACAGTCA---AAGGGGGATCCGTT
TTGTAAACGATTGGATCAGTAAATG-AAAATTTACTGGGATTYCATCCT-------TGTGAGATCGT-----CAATATTG
TACCAAGGGTTTCGTTAMAGTAN---------------------------------------------------------
--------------------------------------------------------------------------------
--------------------------------------------------------------------------------
---------NCATTTTAAAGGAATTGGTTAGTCGTCCAGTACCAAGAACCGGCAGTAGAAAGTATTCGATGAAAGAAGGA
GACGAGAACAACGAA------AAAATAAGTGTAATAATCAATATTCGTGATGTACGC------ATTCTTATAGTAGATCA
-AAAA--GGCCTTCTT----------------------------------------------------------------
--------------------TTCTATT---------------------TTATT------TCTCC------AGAATTGTCC
AACGAATCTCTTG-----------ATTCGGAATCACGTGAGGATAGG---------------TGAATGTTTTAGATGATG
AA----------TGGA---TTTCTTTTTCTAC--TT-A--TACCACTCTATTTTT-----GTTAGTGCCATCTATAGAT-
--------AATA-ATATATAATTATTATG--------ATTGA------TAAATAATTGATA--------------AATTA
A----AAACTTTCAATTGAACGTATTCATTTAATATTGGTATGTA---TTTTTTTTATTCTTGTATCTTTC----AAAAA
ATTG--------AACGTTAGGGAAGTACTTTATAACCATATGATATGT------AG-AAAAAAGTTTATTTAGTTCTTTC
ATGCCTACTATAACTAGTTATTTCGGTTTTCTACTAGCGGCTTTAACTATAACCTCAGTTTTATTTTTTGGTATGAGTAG
GATACGACTTATTT----GAAATGAATTGACTGAACAATTCAT-AAAAAAAGA---------------------------
TTATC-----TAGT--------GTGTCAATTTCCATTCCAATTCTTGGTTATTGAGATTTATGGATAATATGGATTAATA
TTTAAGGATAGATATTACCTCT----------------------------------------------------------
--------------------------------------------------------------------------------
----------TTAATT-----AACATCGTGC----C--TTTTTTGACCTCCTTTTA-----AATCCGCAG--GAG----G
TC-AAATTAGAGTAGATTGTTGTTCCAT--TTTT-------ATTTTGACCT-----------------------AATTCA
CGCTCTGTAGGATTTGA----------ACCTACGACATTAGGTTTTGGAGACCTACGTTCTACCGAACTGAACTAAGAGC
GC----TTTT-------TTTATGACAAAGAATATAAGACTGTAAGGAAAAATATTC------------------------
-----------------------------------TTTT-----------------------------------------
----------------------------------AAAAAT----GAAAGATTAGGTATGT--CCAATTT-----TAATTG
ATCTCAATTGA------TCCCTCG----TTGTTGCTTAGAGACGAAGTAATAGGTA------------------------
--------------------------------------------------------------------------------
-----------------------------------------TGATATACACAACTTATCTTGCTATTTC-TTCTTTTTGG
TCTC--------------------AT------------------------------------------------------
--------------------------------------------------------------------------------
--------------------------------------------------------------------------------
----------------------------ATGAATGCAAGTGG-------CC--TTT---------AATTA-CATAAACCT
TAGATC------ATGTATGTA-----TTATACAATAAACAT-----TTTTTTT-----TTACACT-------AAAGAAGG
AGGATT-----TAAAATGCGAGATTTCAAAACATATCTATCCGCGGCACCGGTAATAAG---------------------
--------------------------------------------------------------------------------
------------------------------------GAATTAAAAATTTGTGACTA----------CTCCTCC--TTTCT
CTTTTCTCG---------------------------TTTTTTTAATTCC-TCTTTT------TTAGG-------------
-----------ATAAGTTAG---------------------------------------AAAGAGAAAGAATAAGTGG--
----------------------------ATTCAAACTTAGTGA---------AACTGG------------------CTTG
G---------------------------------------------GTCCTGCCTTCAAGTAAATTAA------------
------------------CTTTAAGTAAATTTACTTTAATCCAATTAAGAGAACAG------AAGTC-------------
--------------------------------------------------------------------------------
--------------------------------------------------------------------------------
-------------------------------------------------TTCTAT-----TTTTTCCTT-----------
-CC--TTTCTTCTTCG------TTTTGGAT--CAAAAA----AAAA---AGAGAA-----GAG-TTGATTGGAT--AAAA
AATCCAA---AGGAGG--TTCATGGCCAAGGGTAAAGATGCCCGAGTAAGGGTTA--TTTTGGAATGTACCGGTTGTGTT
CGAA--ACAGTGTTAATAAGAAATCAACAGGCATTTCCAGATATATTACTCAAAAGAATCGTCACAATACGCCTAGCCGA
TTGGAATTGAGAAAATTTTG------------------------------------------------------------
--------------------------------------------------------------------------------
--------------------------------------------------------------------------------
--------------------------------------------------------------------------------
--------------------------------------------------------------------------------
--------------------------------------------------------------------------------
--------------------------------------------------------------CAACGATTAATTACTATT
GCTATAAAACAAGCTCGTATTTTATCTTCGTTACCTTTTCTTAGTAATGAAAAACAATTTG-AAAAAAGCGAGTTGGTCG
TTAAAATGACTGGTCTTAGAACCAG---AAAAAAATAGGCTTACTCTATC------------------------------
--------------------------------------------------------------------------------
-------------------------TTTTTTTTATT-------------------------------------------G
AATA--TTTTTGTTCAGTTTCACTACT--TGATCATATTATGATCATATT------------------------------
----------------------------------------------------------------------TTATC-----
----------------------------------------------------A---------------------------
--------------------------------------------------------------------------------
--------------------ATTTAATATGGCTATTTGCGCCAGTATTTTACGATTAAGAAGCAATTGTTTCTTGTATAG
ATTTTTTATTAATCTACTATAACTATAGGATGCCTTATTCTCACGAATTACTGCATTCATCCGAGTAATCCACAAACGAC
GAAAATCTCTTTTTTGCCC-ATCTCTATCCCGATGGGACGAAAG--AAGCTCTTATGTTTTGTTGGATAATAGTTCGGGT
AAGTCTTGAATGAGCTCCGCGAAAGCTTGATGCGAATAAACGAATTTTTGTTCTACGCCTTCGAGCTATATATCCTCGTC
TAATTCTGGTCATTGACTAAACGAAACTTTGATGAATAACT--------AATTG--------------------------
----------TTAATAACAAAACGGAATCCTCCAAT------GTATA-AAATAACAATTCCAACGGCTTTTGCTACTATA
ACCTTCCCAACCACAA--TT--------TTTTTC---------------------------------------TTT-TTT
TCTTCTAGGCGAC---------AATG---CYT---------------------AGAAGAAAAA-----------------
-----------TTTTA---------------TTGA--------T------------ACT--AA--G--------------
-TATTAAAT-AAAAAAATAGTA----------------------------------------------------------
--------------------------------------------------------------------------------
--------------------------------------------------------------------------------
------------------------------------------------------------------TCATGAATTCTCTA
GTAATAAGCCTTT----CACAACGAAATTTATCTATACA-----------------------------------------
------------------------------------TATAATTTTTCGGCCTTT-TAATTT-AAATAAGATTTTCCCTGC
TT-AAGGTATAATCATTTACTA-----CCAATAGGGAATTCTTT--ATCATTTTAAATGAAAATTTGA-GTGATTGAATT
TCCACCAATAGAAAACA--TAAATTTAATACACAATAATAATAGAAGGGATATAATAGATC--TTT-------TTT----
--TA--------------GATAGTG-AAGGGG----TTTTTCTATC-----CTATCCATC--GGTACTGATCATGGATAG
TGG-AAAAAATTGTTTCCTTT-----CTTTTGTCCTAACCCAC-GATCTGAACGAGT-----------------ACATGT
TCCTCGCCGCTGAGGACATCCCCCAAGAGCGGGGGATTTGGTGACATTTCTGATTGGCTGTCTTGTGTTTCTAATAAGTT
GTTTAATAGTTGGCATATTGAATTGTATGCATAATGGGC------TGGTTTAG-----------ATCGATCCTAACCGGA
-----------A-----------GATTATGAA-----------TTATTT-------------------------------
--------------------------------------------------------------------------------
------------------------GTTTGTGCAATTTGCGTGAAATTCCTGTTATTTTTTA-------------------
----------------------------CTGACATAAAAACATCCCTTTCCATGTCTTCRGATACGACCCATAAGGGTTT
GCCCGTTCTTAATGCATAAA------------------------------------------------------------
--------------------------------------------------------------------------------
--------------------------------------------------------------------------------
-------------CGGATTGCATACGGC-TTCAGACTGGAATTCAC--TTTTACC-------------------------
---------------------------------------------CCTTCCTTTGTGAGTAGTT--AAAAAATACTACGG
TGGCTCCGTTGCTTTATTTCA-----------------------------------------------------------
--------------------------------------------------------------------------------
--------------------------------------------------------------------------------
-------------------------------------------------------------------------CTATCTC
ATACTATTCTTTCGATATCGAATCAAATATTAAATTAC--AAAAAACAA----G-AAAAAAATTTCTTATATCGAATTCG
AAATGCCATGCTATTATTACTTAATATTCATTCATATTTCATATGGCGAAGGCATAGTTTTCTTTGTT--CTTTCAAAT-
-----AAAAAACGCATTGGCGCCAAGCGTGCGGGAATGCTAGACGTT-----------------------ATAAAAGATC
CCATTGAAGCGGCCAATCCCATACATACTGTC------------------------------------------------
-GTATTACCCATCCGCCAGGAGAGTTTATAAACAAATACAAATA------------------------GATATACCATAA
GACCAATAAGTTGATTTGAGATCTCGCTATCAACATC-------------------------------------------
----------------------------------------------CATACGGTTTAACAAAAGTCGCG-----AAAAAA
ACAATCAATGTGTAGCTTCCAGTTCTC-CTGTTTTTGATAG------CTTTCTAACTTCTCT-------TCATTAGAAGA
GGTTGTTCTTCCAT-------TTTTTTTTTT-------CAAGAAAGAGGGGTTTTGACCCGTTTA---------------
----CCTATATGTTTACC-----------TA--TATAT-------AATTCATTAAATTAAACTTATCAA-----------
ATTAACT--TTATTGATGTATTCTTT-CATCGAGATCTAATTCAAATCACGATGACATTTTCTTGTTCC-TGAATGGG--
-TTTCTTTAATTCTTCTTTAGGTTTGTGCTCTACTCCGTGTAAAGATCTGTCCGAATTTGG---ATTTG-CCCGTATAGG
GCAAATGCCCCCAAGACTCCGTC---TTTTTGTT--ACAAC---------------------------------------
--------------------------------------------------------------------------------
------------T-------------------------------------------------------TTT---------
--------------------------------------------------------------------------------
--------------------------------------------------------------------------------
------------------CTAACCATAAATTATTCTAACTGATAATATTAATCTGGATACCCCCAAAACATAGATGAACT
TCACGCTCCAAATTT------TTTATAATTAAATAAATCTTTC-------------AGGATC-TCTCGATCGGGGGAGAG
AACGGGAAAATCCCGT---------------------------------------CCAAATTGAATCGTCTTCCCCAGGA
TTTCTAAAAGGCACTTTTGGAACACCAATAGGCATGA-------------------------------------------
----------------------------------AAAATATTG------------------GCCTTT-------------
--------------------------------ATCATATGTTATGCGTGGATTCGGTAAGTTCATA----AAAATAAAG-
-----------------GAAGACAAAGTAATAA---------------------AGTAAAATTCTTA----TAGC-----
-----------TCCCTTGAATAATGAACAAATCTGTATGCAGTCGTT---------------------------------
--------------------------------------------------------------------------------
--------------------------------------------------------------------------------
[truncated: 25,035,064 more chars]
